# Supplementary material for: Identification of FMR1-regulated molecular networks in human neurodevelopment
Source: HighWire-hosted journal article supplement (doi:10.1101/gr.251405.119), 2020-03-01
Supplement: Supplemental_Table_S1.xlsx [file Supplemental_Table_S1.xlsx]

## Sheet: S1A. read stats
Supplemental Table S1A. Read stats.
	dNPC									vNPC
	H1			H13			GM1			H1			H13			GM1
	FLAG	WT	SMI	FLAG	WT	SMI	FLAG	WT	SMI	FLAG	WT	SMI	FLAG	WT	SMI	FLAG	WT	SMI
reads	32019161	18065727	23060871	13552228	13132468	13659034	24308127	45505553	48999280	31549671	35807942	9475306	19118980	33319553	7871241	49015935	61190768	36207794
reads passing quality filters	31227946	17176477	21180251	13179546	12466204	12971810	23634306	43971963	41526767	30751918	34756227	8712354	18569818	31826153	7251597	47835490	59368838	34498566
unique reads	14439717	4924118	17221843	3658061	4661928	11531321	12527611	13158417	30527824	12422607	12400767	4348211	4788461	4765618	4301831	18140374	12411726	26290203
reads aligned to unique genomic locus	2206960	430599	8058171	1111108	472449	5802492	1975212	1417853	9644004	1819801	1188610	847677	1076106	368856	1115947	2848122	793352	14462993
reads aligned to exons	1311742	101956	1261232	791934	127779	976740	1322013	292616	2593868	1087196	233216	105290	637324	89206	158160	1821304	144765	2913408
	dNeuron									vNeuron
	H1			H13			GM1			H1			H13			GM1
	FLAG	WT	SMI	FLAG	WT	SMI	FLAG	WT	SMI	FLAG	WT	SMI	FLAG	WT	SMI	FLAG	WT	SMI
reads	32439027	36315302	41476066	15005169	19821082	19995187	18741549	23094507	20773586	31133565	35983074	29657788	20007082	17137100	19428068	21438839	19664760	21679349
reads passing quality filters	31288940	33802310	37382997	14554483	19250596	18042386	18034189	22367795	19539699	29956055	34316131	27229382	19462353	16630619	17592280	20806034	18992169	20514390
unique reads	11935293	6742103	26699298	4445741	3878513	14639030	11485814	4003076	14883178	8379834	7374213	22384265	9230174	5311307	14523435	10493767	5361251	16193394
reads aligned to unique genomic locus	2215680	592264	9342861	783467	496331	5822096	2027916	405394	6867072	1914581	868051	10174523	854884	370539	5303417	2626613	540097	8024431
reads aligned to exons	1445144	170542	1533981	447607	243130	780146	1386259	148163	1276287	1193971	258826	1651940	306715	118212	632203	1751885	223910	1509984

## Sheet: S1B. analysis
Supplemental Table S1B. Analysis of sequencing data of CLIP from NPCs and neurons
FMR1 targets (highlighted in yellow) are defined as: padj_SMI<0.05 & padj_WT<0.05 & log2FC_SMI>0 & log2FC_WT>0
				dNPC						vNPC						dNeuron						vNeuron
				FLAG/SMI		FLAG/WT			1232	FLAG/SMI		FLAG/WT			1234	FLAG/SMI		FLAG/WT			629	FLAG/SMI		FLAG/WT			721
stableID	GeneName	biotype	length/bp	log2FC_SMI	padj_SMI	log2FC_WT	padj_WT	avg.log2FC	avg.p	log2FC_SMI	padj_SMI	log2FC_WT	padj_WT	avg.log2FC	avg.p	log2FC_SMI	padj_SMI	log2FC_WT	padj_WT	avg.log2FC	avg.p	log2FC_SMI	padj_SMI	log2FC_WT	padj_WT	avg.log2FC	avg.p
ENSG00000000003	TSPAN6	protein_coding	4535	-1.61913	7.38909e-05	-0.502279	0.700079	-0.955224	1	-1.20966	0.0774984	-1.3792	0.136564	-1.29194	1	-1.30879	0.0434808	0.261241	NA	-0.319974	1	-1.63643	0.00173156	-0.498619	NA	-0.958147	1
ENSG00000000005	TNMD	protein_coding	1610	NA	NA	NA	NA	0	1	NA	NA	NA	NA	0	1	1.85666	NA	-0.87613	NA	1.05884	1	-0.741642	NA	NA	NA	0	1
ENSG00000000419	DPM1	protein_coding	1207	-0.604719	0.433909	0.789543	NA	0.25467	1	-0.427451	0.674397	-0.0973567	0.963766	-0.252983	1	-0.487959	0.694166	0.533007	NA	0.111015	1	-0.228014	0.800402	0.592493	NA	0.239801	1
ENSG00000000457	SCYL3	protein_coding	6883	-0.758456	0.376421	-0.437946	NA	-0.589319	1	-0.826878	0.374018	-0.308922	0.884673	-0.544779	1	-0.701849	0.442848	1.92341	NA	1.14012	1	-0.299392	0.658596	-0.146232	0.945482	-0.220781	1
ENSG00000000460	C1orf112	protein_coding	5967	-0.492213	0.477924	0.69952	0.700844	0.22336	1	-1.29546	0.167246	-1.17131	0.455859	-1.23205	1	-0.437405	0.664721	0.171395	NA	-0.101127	1	-0.635793	0.414486	0.722941	NA	0.197947	1
ENSG00000000938	FGR	protein_coding	3474	-0.0262819	NA	-3.54752	NA	-0.905802	1	NA	NA	NA	NA	0	1	1.41354	NA	-1.33404	NA	0.613795	1	NA	NA	NA	NA	0	1
ENSG00000000971	CFH	protein_coding	8145	0.851342	NA	-0.223762	NA	0.411702	1	NA	NA	-3.32248	NA	0	1	1.45133	NA	-1.26744	NA	0.655353	1	0.98028	NA	-1.00336	NA	0.305495	1
ENSG00000001036	FUCA2	protein_coding	2793	-0.65268	0.331627	-1.42799	0.208359	-0.988868	1	-0.017421	0.990381	-1.01184	0.396393	-0.430597	1	-1.33413	0.375037	-1.68483	NA	-1.49885	1	0.142601	0.892644	2.33329	NA	1.61905	1
ENSG00000001084	GCLC	protein_coding	8463	0.489186	0.346395	2.02322	0.11286	1.45116	1	0.738485	0.322636	1.13821	0.335386	0.952145	1	0.638248	0.341029	1.05394	NA	0.861013	1	0.865118	0.0670778	1.74048	0.267246	1.3682	1
ENSG00000001167	NFYA	protein_coding	3811	-0.59361	0.306243	0.604292	0.729216	0.126256	1	-0.355337	0.715109	2.8538	0.14911	2.00193	1	0.330017	0.665221	1.54377	NA	1.06094	1	-0.0759531	0.903174	1.60608	NA	0.997455	1
ENSG00000001460	STPG1	protein_coding	8511	-0.545879	0.77027	-1.35844	NA	-0.895693	1	0.553794	0.800333	2.07349	NA	1.50512	1	0.13048	0.964332	0.994536	NA	0.626251	1	-0.390889	0.843265	-0.517884	NA	-0.45299	1
ENSG00000001461	NIPAL3	protein_coding	9404	-0.729688	0.373409	-0.800559	NA	-0.764688	1	-0.599169	0.687719	-0.528603	0.822311	-0.563455	1	-0.632552	0.540896	-1.75289	0.255107	-1.0866	1	-0.36891	0.675074	-0.871709	NA	-0.598515	1
ENSG00000001497	LAS1L	protein_coding	5589	1.7478	4.43157e-05	0.695567	0.487929	1.31556	1	2.01341	0.000369808	-0.682889	0.322803	1.22041	1	0.12472	0.885614	-1.29428	0.266888	-0.416929	1	0.39186	0.486415	-0.498902	0.748598	0.0141618	1
ENSG00000001561	ENPP4	protein_coding	4651	-1.99819	0.0041876	-1.52022	NA	-1.7395	1	-0.653296	0.55362	-0.0387555	0.984368	-0.313549	1	-1.7988	0.0262803	1.52127	NA	0.658947	1	-1.31966	0.0472882	0.558777	NA	-0.0941496	1
ENSG00000001617	SEMA3F	protein_coding	4826	1.13265	0.0686565	0.964088	0.532547	1.05083	1	1.91013	0.180255	0.281903	0.911541	1.31447	1	0.701007	0.357221	-0.495204	0.792246	0.223485	1	1.38918	0.151499	-0.5441	NA	0.724698	1
ENSG00000001626	CFTR	protein_coding	8517	4.81256	0.0715137	0.837011	NA	3.90147	1	-0.582606	NA	-3.63385	NA	-1.41829	1	2.25544	NA	-1.60503	NA	1.35149	1	-1.51862	NA	-4.81872	NA	-2.37912	1
ENSG00000001629	ANKIB1	protein_coding	7130	1.30259	1.26922e-05	1.3884	0.0414939	1.34613	0.0207533	0.694347	0.110645	1.12442	0.0819438	0.925349	1	1.5188	2.51751e-08	0.129478	0.893803	0.985291	1	1.32611	2.01993e-07	0.347268	0.721118	0.91816	1
ENSG00000001630	CYP51A1	protein_coding	4074	-0.312697	0.530053	1.53258	0.243691	0.88681	1	-0.438617	0.479264	-0.0726533	0.95622	-0.244062	1	-1.74182	6.90674e-06	-0.250045	0.895181	-0.81114	1	-1.03059	0.00164786	-0.433767	0.750588	-0.701536	1
ENSG00000001631	KRIT1	protein_coding	6204	-0.543459	0.1875	0.383329	0.756211	-0.00688908	1	-0.661534	0.17706	0.329446	0.774834	-0.0825789	1	-0.54831	0.230359	-1.51256	0.0613824	-0.951331	1	-0.869951	0.0107372	-1.28458	0.178807	-1.06242	1
ENSG00000002016	RAD52	protein_coding	4190	-1.85614	0.00709744	-2.07788	0.107402	-1.96275	1	-2.07702	0.0172678	-2.64541	0.0164611	-2.3334	1	-1.22022	0.1363	-1.76058	NA	-1.46525	1	-1.76816	0.0296288	-1.50234	NA	-1.62914	1
ENSG00000002079	MYH16	transcribed_unitary_pseudogene	6307	2.86877	NA	-1.90897	NA	1.92042	1	0.864991	0.812056	-2.00161	NA	0.0503615	1	1.73231	NA	-1.35571	NA	0.892714	1	1.04281	NA	-2.6352	NA	0.151338	1
ENSG00000002330	BAD	protein_coding	1708	-0.386352	0.820025	0.827927	NA	0.344939	1	-0.0939236	0.974663	-0.176616	NA	-0.134678	1	0.132408	0.933214	-0.669668	NA	-0.213593	1	0.360963	0.78487	-0.428404	NA	0.0196067	1
ENSG00000002549	LAP3	protein_coding	3785	1.42301	0.0112887	0.629311	0.644912	1.08007	1	1.4197	0.0528376	2.38926	0.0764774	1.98444	1	1.66815	0.220092	2.67388	NA	2.25694	1	1.42437	0.0917807	2.76949	NA	2.24833	1
ENSG00000002586	CD99	protein_coding	3284	NA	NA	NA	NA	0	1	NA	NA	NA	NA	0	1	NA	NA	NA	NA	0	1	NA	NA	NA	NA	0	1
ENSG00000002586	CD99	protein_coding	3284	NA	NA	NA	NA	0	1	NA	NA	NA	NA	0	1	NA	NA	NA	NA	0	1	NA	NA	NA	NA	0	1
ENSG00000002587	HS3ST1	protein_coding	8166	0.632449	0.767223	0.774963	NA	0.705465	1	0.848244	NA	-0.38075	NA	0.36084	1	1.02258	0.753588	-0.236892	NA	0.526128	1	-2.06041	0.484954	-1.48528	NA	-1.74437	1
ENSG00000002726	AOC1	protein_coding	3824	-0.468459	NA	-0.624121	NA	-0.544192	1	-0.44378	0.914439	-3.52662	NA	-1.28283	1	-2.93111	0.203793	-0.87613	NA	-1.56503	1	-2.31765	0.345451	-2.68956	NA	-2.49165	1
ENSG00000002745	WNT16	protein_coding	3261	2.08276	NA	-3.91217	NA	1.10521	1	1.26199	NA	-0.955204	NA	0.543017	1	-0.349544	NA	-3.20604	NA	-1.16295	1	-0.84818	NA	NA	NA	0	1
ENSG00000002746	HECW1	protein_coding	13965	2.85912	5.24e-06	2.79122	0.0329403	2.82557	0.0164727	2.92483	0.0261869	0.62936	0.782326	2.19231	1	1.60552	3.45919e-08	2.10938	0.0100446	1.87934	0.00502234	1.97166	8.4752e-12	0.878913	0.359889	1.52637	1
ENSG00000002822	MAD1L1	protein_coding	7230	1.56221	0.00992047	0.426974	0.77555	1.10349	1	1.34886	0.135153	-0.773061	0.539457	0.647215	1	0.814008	0.380566	1.12878	NA	0.979963	1	1.30256	0.0513721	0.333247	0.873773	0.897826	1
ENSG00000002834	LASP1	protein_coding	7061	-0.993372	0.00577047	-1.21615	0.0717721	-1.10047	1	-0.566742	0.367167	-0.855399	0.350766	-0.703863	1	-0.154418	0.725949	-0.0437101	0.974071	-0.0980022	1	0.0369385	0.922448	-0.439897	0.698712	-0.181868	1
ENSG00000002919	SNX11	protein_coding	3606	0.0758504	0.951878	1.6884	NA	1.09659	1	0.032202	0.985211	1.04121	NA	0.623177	1	-0.664033	0.643591	-2.72459	NA	-1.35402	1	0.0744632	0.93929	0.535601	NA	0.323379	1
ENSG00000002933	TMEM176A	protein_coding	3479	-0.0262819	NA	-3.15827	NA	-0.87044	1	-1.68762	NA	NA	NA	0	1	1.45133	NA	-1.88397	NA	0.587625	1	NA	NA	NA	NA	0	1
ENSG00000003056	M6PR	protein_coding	3777	-1.60342	0.00612109	-1.04802	0.484267	-1.29916	1	-0.946685	0.155298	-1.37003	0.138743	-1.14288	1	-1.53136	0.034641	-1.56577	NA	-1.54846	1	-1.33266	0.0192503	-1.53854	0.291521	-1.43193	1
ENSG00000003096	KLHL13	protein_coding	6983	2.14482	2.37223e-05	2.71177	0.0518134	2.45597	1	2.02596	0.00770844	1.69621	0.0928563	1.87049	1	1.78945	0.00235473	1.15916	0.480768	1.50846	1	2.20891	7.18926e-07	1.99785	0.11822	2.10724	1
ENSG00000003137	CYP26B1	protein_coding	5015	0.429396	0.814644	0.464518	NA	0.447064	1	-0.109442	NA	-2.2176	NA	-0.808506	1	1.90997	0.35884	-0.868458	NA	1.10626	1	-1.35225	0.587417	-0.704791	NA	-0.992501	1
ENSG00000003147	ICA1	protein_coding	4891	0.521516	0.540579	-0.43369	0.803368	0.121565	1	0.820162	0.376785	-0.106462	0.945411	0.43	1	1.06063	0.366751	0.606616	NA	0.851409	1	0.849842	0.369769	1.28853	NA	1.0858	1
ENSG00000003249	DBNDD1	protein_coding	4791	-0.912181	0.524852	0.533098	NA	-0.0156556	1	-0.138925	0.958618	-1.52963	NA	-0.672815	1	0.0770847	0.955198	-2.1887	0.10186	-0.65037	1	0.360259	0.662934	-1.07513	0.558839	-0.185831	1
ENSG00000003393	ALS2	protein_coding	10384	2.11916	1.80996e-16	2.80876	2.34743e-07	2.50478	1.17371e-07	1.67815	2.12141e-06	3.46714	6.09389e-08	2.83381	1.09117e-06	2.25654	1.93159e-18	1.3154	0.0911916	1.86139	1	2.39925	2.85204e-29	2.41591	0.385769	2.40761	1
ENSG00000003400	CASP10	protein_coding	7598	0.238509	0.943029	-2.19375	NA	-0.516269	1	-1.32458	NA	-1.76803	NA	-1.52933	1	-0.349544	NA	NA	NA	0	1	-1.03066	NA	-3.54255	NA	-1.7976	1
ENSG00000003402	CFLAR	protein_coding	22529	-0.76208	0.376943	-0.904065	NA	-0.831327	1	-1.33819	0.0905906	-0.964612	0.543681	-1.13934	1	-1.0614	0.558499	-2.34925	NA	-1.56616	1	-1.03347	0.0803104	-0.296586	NA	-0.618483	1
ENSG00000003436	TFPI	protein_coding	11714	-3.29833	0.00152579	-3.02063	NA	-3.15281	1	-2.37276	0.404257	0.0218091	NA	-0.727012	1	-1.1266	0.567638	0.0122678	NA	-0.447589	1	-1.67925	0.383195	-1.71318	NA	-1.69612	1
ENSG00000003509	NDUFAF7	protein_coding	3651	-0.491364	0.586825	-0.391453	NA	-0.440544	1	-0.381852	0.774698	-0.428098	0.848766	-0.40479	1	-1.02182	0.207985	-0.799065	NA	-0.906147	1	-1.56677	0.0185784	-1.90046	0.232483	-1.72399	1
ENSG00000003756	RBM5	protein_coding	10368	-0.208476	0.484106	0.202419	0.761802	0.0115509	1	-0.870775	0.0101634	-0.655931	0.19935	-0.759357	1	-1.21915	5.53453e-07	-1.14408	0.0588998	-1.18113	1	-0.896273	2.42848e-05	-0.486752	0.638928	-0.67703	1
ENSG00000003987	MTMR7	protein_coding	5692	-0.128716	0.894287	-0.0822737	NA	-0.105308	1	-1.59814	0.228835	-0.396204	NA	-0.875463	1	-0.743514	0.178736	-0.863568	0.527442	-0.802292	1	-0.446698	0.400167	0.428751	0.832671	0.0564363	1
ENSG00000003989	SLC7A2	protein_coding	7905	-1.47328	0.301726	0.633287	NA	-0.065478	1	-1.18716	0.2275	0.00610335	0.997521	-0.470524	1	-0.970869	0.653137	-0.774549	NA	-0.869372	1	-0.994978	0.404905	2.13497	NA	1.29102	1
ENSG00000004059	ARF5	protein_coding	1871	-0.049845	0.93981	-0.697679	0.484876	-0.3377	1	0.345551	0.743777	-0.554278	0.635922	-0.0353172	1	-0.306859	0.629112	0.228954	0.901443	-0.0142192	1	0.278422	0.618865	-0.198153	0.916398	0.0597246	1
ENSG00000004139	SARM1	protein_coding	11137	1.01779	0.0453479	0.824059	0.393565	0.924172	1	1.11527	0.0523091	0.277043	0.833807	0.756199	1	0.409223	0.327838	1.54458	0.116573	1.08582	1	0.470368	0.104905	0.0992146	0.937458	0.296694	1
ENSG00000004142	POLDIP2	protein_coding	2121	0.918384	0.0939409	1.27255	0.345954	1.10631	1	1.0843	0.157895	-0.0802789	0.956296	0.616462	1	0.855119	0.212949	0.56371	NA	0.71676	1	1.18143	0.0280308	1.99039	0.264043	1.64188	1
ENSG00000004399	PLXND1	protein_coding	9738	2.39269	5.51502e-09	3.29991	0.00294681	2.91647	0.00147341	2.7213	4.86573e-05	0.502864	0.617297	2.0021	1	2.30385	0.00810157	1.7812	NA	2.06606	1	3.63679	6.83185e-19	2.57994	0.0324753	3.20305	0.0162377
ENSG00000004455	AK2	protein_coding	5727	-2.60254	8.17525e-07	-2.008	0.12084	-2.27486	1	-2.45139	0.000418777	-1.40529	0.392967	-1.83553	1	-1.77297	0.00442978	0.825593	NA	0.0460506	1	-2.08701	0.000186882	-0.96066	NA	-1.4166	1
ENSG00000004468	CD38	protein_coding	6855	-1.23996	NA	-3.95691	NA	-2.0357	1	-0.970765	NA	-2.0095	NA	-1.3986	1	0.692498	NA	-3.06812	NA	-0.204803	1	-1.39853	NA	NA	NA	0	1
ENSG00000004478	FKBP4	protein_coding	5180	0.891622	0.00221863	0.655877	0.374775	0.77856	1	1.70692	4.51925e-05	1.27448	0.0410766	1.50684	0.0205609	0.758478	0.14883	-0.217958	0.885541	0.351338	1	1.01229	0.0128028	-0.441623	0.722701	0.46122	1
ENSG00000004487	KDM1A	protein_coding	5435	2.17311	9.72129e-22	1.52294	6.9191e-05	1.88435	3.45955e-05	2.41013	4.3797e-21	2.06038	4.6645e-08	2.24582	2.33225e-08	1.83023	3.73837e-17	0.900354	0.139138	1.43895	1	2.2793	5.96837e-27	1.05681	0.161235	1.79384	1
ENSG00000004534	RBM6	protein_coding	7302	0.915501	0.00135177	0.542561	0.389335	0.741048	1	-0.0649213	0.908349	-0.383602	0.566173	-0.21548	1	0.796265	0.00169867	-0.392104	0.632264	0.321129	1	0.572315	0.0167766	-0.366427	0.711549	0.177987	1
ENSG00000004660	CAMKK1	protein_coding	7424	0.588349	0.705255	-0.316692	NA	0.205664	1	1.18051	0.605959	-0.449659	NA	0.584377	1	0.658547	0.629971	0.0523094	NA	0.38704	1	0.247101	0.806548	-0.508569	NA	-0.0818126	1
ENSG00000004700	RECQL	protein_coding	3778	0.826521	0.109976	1.6707	0.161016	1.3095	1	0.809488	0.27488	2.59601	0.07463	1.96323	1	0.0374007	0.974728	0.321121	NA	0.186224	1	0.451883	0.456766	0.896352	0.668089	0.691167	1
ENSG00000004766	VPS50	protein_coding	9454	0.605465	0.260923	1.3136	0.280757	1.00255	1	0.307854	0.697017	0.758931	0.568974	0.550951	1	1.02673	0.0172019	1.37863	0.266636	1.21338	1	0.767929	0.0501902	0.639209	0.623544	0.705004	1
ENSG00000004776	HSPB6	protein_coding	1721	1.0414	NA	-2.0957	NA	0.196715	1	2.05503	NA	-2.94132	NA	1.09954	1	3.25225	NA	1.44341	NA	2.61449	1	2.51592	0.350643	0.628748	NA	1.86113	1
ENSG00000004777	ARHGAP33	protein_coding	5260	1.37731	0.00265884	0.0660087	0.948549	0.865782	1	1.54613	0.00112446	0.118812	0.910477	1.00222	1	1.00596	0.000179579	0.141952	0.888554	0.637693	1	1.31404	1.38095e-06	0.57567	0.539373	0.991585	1
ENSG00000004779	NDUFAB1	protein_coding	1600	0.17156	0.856462	0.847393	NA	0.548694	1	0.670703	0.537906	1.43544	0.410489	1.10316	1	0.509343	0.650123	1.66885	NA	1.20258	1	1.70284	0.0196676	-0.12415	0.954437	1.06107	1
ENSG00000004799	PDK4	protein_coding	4519	0.841458	NA	-2.29385	NA	-0.00303972	1	-0.523312	NA	-1.4401	NA	-0.910075	1	1.45133	NA	-1.26744	NA	0.655353	1	0.98028	NA	-1.00336	NA	0.305495	1
ENSG00000004809	SLC22A16	protein_coding	3907	NA	NA	-3.26027	NA	0	1	NA	NA	-3.32248	NA	0	1	1.48924	NA	-1.3335	NA	0.679969	1	NA	NA	NA	NA	0	1
ENSG00000004838	ZMYND10	protein_coding	4009	0.799946	0.789983	-0.432014	NA	0.311655	1	-1.29366	NA	-2.41599	NA	-1.74833	1	-2.06342	0.356927	-1.19411	NA	-1.56425	1	-0.96955	NA	-2.21633	NA	-1.46225	1
ENSG00000004846	ABCB5	protein_coding	9257	2.48488	NA	-1.47292	NA	1.57486	1	0.309205	NA	-2.21864	NA	-0.460103	1	0.551482	NA	-1.3335	NA	-0.102841	1	NA	NA	NA	NA	0	1
ENSG00000004848	ARX	protein_coding	3097	0.649034	0.25524	0.0492357	0.973669	0.380084	1	0.737903	0.435011	1.00274	0.56497	0.87639	1	1.22342	0.0488492	-1.6605	0.162746	0.406712	1	1.14307	0.00381615	-0.29974	0.829822	0.594982	1
ENSG00000004864	SLC25A13	protein_coding	3710	1.14851	0.00291479	1.38788	0.0818648	1.27315	1	1.63699	0.00060994	1.0407	0.132738	1.36944	1	1.09402	0.0864235	2.04692	NA	1.64775	1	1.52847	0.000350791	1.78079	0.197894	1.66014	1
ENSG00000004866	ST7	protein_coding	6742	0.259686	0.752587	0.962851	NA	0.653691	1	-0.334568	0.699931	-0.558807	0.692382	-0.442335	1	-0.651259	0.198623	-0.155142	0.927347	-0.381979	1	-0.409153	0.346998	-0.585754	0.644944	-0.494753	1
ENSG00000004897	CDC27	protein_coding	6824	-0.532723	0.145625	1.07649	0.274864	0.485504	1	-0.735731	0.137669	0.101001	0.941794	-0.257536	1	-0.549202	0.141609	0.766731	0.545802	0.253874	1	-0.762137	0.00773941	0.296074	0.825988	-0.138107	1
ENSG00000004939	SLC4A1	protein_coding	5287	0.841458	NA	-3.22806	NA	-0.0750764	1	NA	NA	-3.32248	NA	0	1	0.212282	NA	-1.26744	NA	-0.345642	1	-0.778303	NA	NA	NA	0	1
ENSG00000004948	CALCR	protein_coding	4042	0.623758	NA	-2.96693	NA	-0.261204	1	-0.0202362	0.996175	-1.64216	NA	-0.614352	1	0.0973249	0.975698	-2.5243	NA	-0.685464	1	-0.925392	NA	-1.94	NA	-1.34528	1
ENSG00000004961	HCCS	protein_coding	2335	-1.34631	0.143039	1.61772	NA	0.791684	1	-0.527737	0.761036	-1.26953	0.522785	-0.851475	1	-0.597034	0.605168	-1.24254	NA	-0.88398	1	-0.969018	0.259202	0.723528	NA	0.112412	1
ENSG00000004975	DVL2	protein_coding	5350	0.791392	0.0277218	1.23947	0.127562	1.03276	1	1.4444	0.00120381	1.35617	0.0523843	1.40096	1	0.040407	0.949811	-0.609972	0.596664	-0.248439	1	0.514868	0.201531	0.116064	0.93886	0.329202	1
ENSG00000005001	PRSS22	protein_coding	2387	-0.0262819	NA	NA	NA	0	1	0.474498	NA	-1.53274	NA	-0.205018	1	1.48924	NA	-1.3335	NA	0.679969	1	0.0951944	NA	-2.65175	NA	-0.70447	1
ENSG00000005007	UPF1	protein_coding	8600	2.33641	8.58619e-19	2.122	6.64069e-05	2.23318	3.32035e-05	3.10547	3.20623e-15	2.6544	1.09326e-06	2.89749	5.46632e-07	2.26655	3.54272e-11	2.42413	0.00849333	2.34749	0.00424666	3.23169	2.0964e-33	1.95557	0.0227003	2.73036	0.0113501
ENSG00000005020	SKAP2	protein_coding	5520	-1.18581	0.500089	-0.434404	NA	-0.761729	1	-1.27337	0.551458	1.60477	NA	0.788751	1	-0.826899	0.654578	0.626906	NA	0.0758673	1	-0.49254	0.815098	-1.05082	NA	-0.744841	1
ENSG00000005022	SLC25A5	protein_coding	1500	-0.0589004	0.942337	0.897677	0.576086	0.497259	1	0.495978	0.605824	0.598695	0.675128	0.54825	1	1.26206	0.189568	0.507323	NA	0.933491	1	1.11838	0.149748	1.24995	NA	1.18566	1
ENSG00000005059	MCUB	protein_coding	3566	0.175938	0.866623	0.46662	NA	0.328587	1	1.18175	0.445653	0.331284	0.911375	0.818298	1	0.790572	0.686346	1.12292	NA	0.966295	1	0.44607	0.80508	1.16556	NA	0.850209	1
ENSG00000005073	HOXA11	protein_coding	2307	2.51516	NA	-0.624121	NA	1.67025	1	1.77849	NA	-1.52119	NA	0.918033	1	1.48924	NA	-2.45148	NA	0.580256	1	1.79437	NA	-1.55778	NA	0.929152	1
ENSG00000005075	POLR2J	protein_coding	1355	0.706742	0.587266	-0.614795	NA	0.192281	1	-0.455249	0.810497	-0.779389	NA	-0.608234	1	0.364364	0.856729	-0.487467	NA	0.000425568	1	0.619102	0.655796	-0.183473	NA	0.272919	1
ENSG00000005100	DHX33	protein_coding	5872	0.414528	0.405258	0.515367	0.649542	0.465829	1	0.626725	0.357221	0.640817	0.57478	0.633788	1	0.621783	0.307767	0.905685	0.572706	0.770706	1	0.293591	0.643197	0.688986	0.68685	0.504792	1
ENSG00000005102	MEOX1	protein_coding	2707	-0.418468	NA	NA	NA	0	1	NA	NA	-4.07507	NA	0	1	0.56728	NA	-1.26744	NA	-0.0761862	1	1.40156	NA	-2.44148	NA	0.498748	1
ENSG00000005108	THSD7A	protein_coding	10929	2.04763	2.19422e-05	2.67859	0.0103575	2.39733	0.00518971	1.57841	0.00142493	2.51829	0.00635645	2.12358	0.00389069	0.514341	0.134511	-0.0396289	0.972773	0.263784	1	0.859288	0.00077151	0.0785659	0.947428	0.521106	1
ENSG00000005156	LIG3	protein_coding	12919	1.13619	2.89853e-06	1.27611	0.0100721	1.20785	0.00503748	1.43137	2.40513e-06	1.58035	0.000387405	1.50778	0.000194905	0.786434	0.0465651	1.59345	0.159584	1.24565	1	1.18976	4.25606e-06	1.35445	0.152849	1.27445	1
ENSG00000005175	RPAP3	protein_coding	5381	0.362577	0.415148	1.50788	0.100021	1.04601	1	0.334326	0.574758	0.390694	0.679025	0.362785	1	0.10562	0.853542	0.634538	0.627939	0.394183	1	0.056076	0.893959	0.26509	0.858088	0.164365	1
ENSG00000005187	ACSM3	protein_coding	7822	0.180657	NA	-0.624121	NA	-0.166329	1	-1.99242	NA	-1.4643	NA	-1.70433	1	2.22711	NA	-0.487418	NA	1.43169	1	-0.761308	NA	-1.70133	NA	-1.15607	1
ENSG00000005189	REXO5	protein_coding	4114	0.229582	0.817557	0.587885	NA	0.419828	1	1.16698	0.376934	2.88204	NA	2.26564	1	-0.20538	0.924285	0.0248186	NA	-0.0856941	1	0.075982	0.961037	0.696402	NA	0.419289	1
ENSG00000005194	CIAPIN1	protein_coding	3509	-1.21666	0.121673	-1.57358	0.29267	-1.38411	1	0.0144432	0.992569	0.415488	0.86026	0.228857	1	-0.548935	0.64844	2.14428	NA	1.3517	1	-0.068559	0.952316	0.560335	NA	0.279888	1
ENSG00000005206	SPPL2B	protein_coding	7130	-0.409559	0.523696	-1.52757	0.0658975	-0.862871	1	-0.0205727	0.984055	-0.72884	0.477733	-0.331672	1	0.0498609	0.949811	-1.19558	0.2392	-0.442441	1	-0.578737	0.245239	-0.917878	0.510538	-0.738365	1
ENSG00000005238	FAM214B	protein_coding	6409	-0.334412	0.575986	-0.490049	0.694948	-0.410133	1	-0.0550978	0.957258	-0.179904	0.90176	-0.116152	1	-0.163809	0.819075	-0.846918	0.480768	-0.465304	1	0.360349	0.429727	0.552012	0.713475	0.459361	1
ENSG00000005243	COPZ2	protein_coding	1851	0.799356	NA	-0.646484	NA	0.250452	1	-1.86802	NA	-0.917045	NA	-1.31555	1	-0.319659	NA	NA	NA	0	1	-1.88783	NA	-1.81579	NA	-1.85136	1
ENSG00000005249	PRKAR2B	protein_coding	4318	0.204123	0.709025	0.267155	0.841673	0.235983	1	0.600051	0.404385	0.444973	0.742404	0.524595	1	-0.434495	0.165671	0.973879	0.289904	0.435131	1	-0.119917	0.753294	-0.214825	0.838642	-0.166591	1
ENSG00000005302	MSL3	protein_coding	6496	-0.882218	0.241547	-0.678876	0.703119	-0.776967	1	-0.900863	0.504072	-0.852363	0.664969	-0.876409	1	-0.80688	0.319544	-2.61282	0.00864619	-1.444	1	-0.587765	0.379574	0.620144	NA	0.139078	1
ENSG00000005339	CREBBP	protein_coding	15492	2.60788	1.02032e-37	1.70248	5.58546e-07	2.22507	2.79273e-07	2.38758	2.98438e-18	1.43171	3.02766e-05	1.9874	1.51383e-05	2.79498	9.05678e-56	1.69498	0.000231742	2.34737	0.000115871	3.05693	1.72844e-63	1.26941	0.0396948	2.42393	0.0198474
ENSG00000005379	TSPOAP1	protein_coding	11354	1.88141	4.24458e-06	0.889352	0.268088	1.46902	1	1.11557	0.0797113	-0.137577	0.911678	0.620988	1	1.27337	2.72405e-06	0.124749	0.897133	0.810473	1	1.4517	6.23929e-08	0.0062246	0.994619	0.902894	1
ENSG00000005381	MPO	protein_coding	3526	NA	NA	-3.18064	NA	0	1	0.651708	NA	-2.36168	NA	-0.179848	1	NA	NA	NA	NA	0	1	0.0475709	NA	-2.71865	NA	-0.754578	1
ENSG00000005421	PON1	protein_coding	2832	0.609043	NA	-1.37783	NA	-0.0663927	1	-0.209437	NA	-1.1508	NA	-0.604664	1	-0.690091	NA	NA	NA	0	1	-0.741642	NA	NA	NA	0	1
ENSG00000005436	GCFC2	protein_coding	5465	-0.594629	0.527762	-0.537258	NA	-0.565658	1	-0.32557	0.830182	1.20431	NA	0.633317	1	0.0278395	0.989298	-1.79288	NA	-0.612551	1	-0.383571	0.658618	0.377999	NA	0.0468934	1
ENSG00000005448	WDR54	protein_coding	2860	0.97284	0.171254	1.0237	0.565031	0.998492	1	1.84666	0.0672401	0.873608	0.590336	1.44066	1	0.863936	0.468369	1.76576	NA	1.3842	1	0.788817	0.40046	1.07251	NA	0.937625	1
ENSG00000005469	CROT	protein_coding	4979	-0.340599	0.452288	0.586163	0.597494	0.195954	1	-0.243616	0.8096	-0.454043	0.72699	-0.344997	1	-0.651336	0.50407	0.803943	NA	0.252511	1	-0.536858	0.499305	1.93264	NA	1.1721	1
ENSG00000005471	ABCB4	protein_coding	7494	3.30823	0.127669	1.82259	NA	2.74875	1	0.958115	0.589707	1.36877	NA	1.17801	1	-0.349544	NA	-4.11557	NA	-1.24722	1	1.7609	0.498047	0.949409	NA	1.41148	1
ENSG00000005483	KMT2E	protein_coding	9231	1.02324	8.99366e-06	0.530422	0.203609	0.797771	1	0.514239	0.162854	0.0462067	0.940269	0.29912	1	1.81982	3.03963e-21	0.00178507	0.998151	1.18002	1	1.61675	5.87281e-16	0.3586	0.715962	1.12069	1
ENSG00000005486	RHBDD2	protein_coding	2441	-0.00553768	0.994118	-0.426129	0.756211	-0.20056	1	0.094187	0.92532	-1.20392	0.128335	-0.41354	1	0.256609	0.770432	-1.43373	0.191326	-0.353985	1	0.299935	0.560642	-0.652496	0.632486	-0.0990716	1
ENSG00000005513	SOX8	protein_coding	4432	0.944719	0.382362	1.40107	NA	1.19086	1	1.22086	0.109194	0.446591	0.745933	0.885054	1	2.07738	0.304855	1.55702	NA	1.84053	1	1.36957	0.246083	1.44793	NA	1.40929	1
ENSG00000005700	IBTK	protein_coding	8722	1.66684	1.95834e-10	1.32093	0.012116	1.50422	0.00605802	1.35132	0.000427958	1.3609	0.0077045	1.35612	0.00406623	1.81531	1.34009e-12	1.69565	0.00742315	1.75672	0.00371157	1.75823	1.57028e-16	1.60554	0.030551	1.6839	0.0152755
ENSG00000005801	ZNF195	protein_coding	5709	0.73098	0.0895674	1.25099	0.211498	1.01429	1	0.308692	0.690994	0.797139	0.47334	0.573489	1	0.256946	0.638925	-0.404339	0.73408	-0.0361346	1	0.230523	0.623268	0.950943	0.499117	0.635242	1
ENSG00000005810	MYCBP2	protein_coding	15945	2.6787	2.69255e-38	2.30799	3.7055e-09	2.50522	1.85275e-09	2.11062	5.61058e-13	2.30673	1.82031e-09	2.21201	9.10438e-10	3.23572	2.75309e-84	0.646302	0.267475	2.45747	1	3.45573	8.57818e-65	1.58523	0.0337428	2.8045	0.0168714
ENSG00000005812	FBXL3	protein_coding	7082	0.0968965	0.885381	1.05382	0.4361	0.653287	1	0.25069	0.761517	0.509323	0.6951	0.385794	1	-0.232482	0.709331	1.61893	NA	0.971828	1	0.122861	0.800222	2.63568	0.0705073	1.86861	1
ENSG00000005844	ITGAL	protein_coding	6472	0.539371	NA	-4.66307	NA	-0.42197	1	1.67345	NA	-1.68833	NA	0.807379	1	2.21697	0.426178	-0.440428	NA	1.42923	1	0.468873	NA	-1.36448	NA	-0.174294	1
ENSG00000005882	PDK2	protein_coding	5481	0.714176	0.428133	2.73052	NA	2.0492	1	1.28517	0.326041	-0.575198	0.758983	0.636126	1	0.613738	0.527255	0.405073	NA	0.513175	1	-0.0060095	0.995635	-0.700891	NA	-0.312012	1
ENSG00000005884	ITGA3	protein_coding	9802	1.52241	0.0736482	0.273567	NA	1.0291	1	0.985513	0.466814	1.29618	NA	1.14919	1	0.862477	0.306008	-0.786803	0.640549	0.261702	1	0.755145	0.189778	-1.63826	0.103761	0.0065104	1
ENSG00000005889	ZFX	protein_coding	9037	0.509797	0.227596	0.794798	0.431994	0.659324	1	0.467247	0.492413	1.16316	0.37149	0.856765	1	0.811082	0.0478655	1.13162	0.344755	0.980233	1	0.856137	0.0166513	1.16275	0.311397	1.01757	1
ENSG00000005893	LAMP2	protein_coding	5526	-1.82889	3.7345e-08	-1.22772	0.125197	-1.49722	1	-1.64466	5.14418e-05	-0.765606	0.397154	-1.13919	1	-2.30767	3.15034e-07	-0.800161	NA	-1.36537	1	-1.97928	1.10779e-10	-0.655061	0.65442	-1.17029	1
ENSG00000005961	ITGA2B	protein_coding	5551	-0.968967	0.597509	-1.25688	NA	-1.10575	1	-0.963017	0.677819	-3.06513	0.101171	-1.66094	1	-1.36166	0.383423	-2.38538	NA	-1.78456	1	-2.03589	0.0938402	-3.08138	NA	-2.46593	1
ENSG00000005981	ASB4	protein_coding	4605	NA	NA	NA	NA	0	1	0.475727	NA	-0.703823	NA	0.003287	1	-0.726967	NA	NA	NA	0	1	0.103678	NA	-1.00336	NA	-0.346164	1
ENSG00000006007	GDE1	protein_coding	4416	0.0717252	0.927246	0.884717	0.536271	0.534746	1	0.0332394	0.973904	-0.0386375	0.98057	-0.00225145	1	0.555256	0.509817	0.605763	NA	0.58073	1	0.652576	0.253028	1.95333	NA	1.44484	1
ENSG00000006015	C19orf60	protein_coding	3370	-0.103571	0.951859	0.089414	NA	-0.0038539	1	0.821184	0.660801	-0.989459	0.613632	0.183024	1	0.173656	0.891989	0.446567	NA	0.316555	1	-0.533214	0.684429	-2.93719	0.0452113	-1.28353	1
ENSG00000006016	CRLF1	protein_coding	3018	-0.395595	NA	-2.30766	NA	-1.05565	1	-0.88486	NA	-0.919396	NA	-0.902025	1	2.2697	NA	-0.366127	NA	1.48493	1	-0.437331	NA	-2.20133	NA	-1.06501	1
ENSG00000006025	OSBPL7	protein_coding	6572	0.6154	0.521769	0.675371	NA	0.645697	1	0.239329	0.856051	0.88385	0.687084	0.597286	1	0.12886	0.930388	-0.859821	NA	-0.282394	1	0.149956	0.876145	-0.651838	NA	-0.195943	1
ENSG00000006042	TMEM98	protein_coding	5187	-0.67127	0.157041	-1.33912	0.0832913	-0.966892	1	-0.316303	0.631467	0.356654	0.777652	0.0590629	1	-0.489482	0.607065	-1.47763	0.353042	-0.900558	1	-0.756488	0.1589	-0.368557	0.850366	-0.549523	1
ENSG00000006047	YBX2	protein_coding	4618	0.109557	0.973357	-2.14162	NA	-0.615374	1	-2.79623	NA	-2.01048	NA	-2.35051	1	-0.121713	0.969799	-2.42528	NA	-0.855602	1	-1.86024	NA	-3.14489	NA	-2.36406	1
ENSG00000006059	KRT33A	protein_coding	1287	NA	NA	NA	NA	0	1	0.474498	NA	-1.53274	NA	-0.205018	1	NA	NA	NA	NA	0	1	NA	NA	-3.60387	NA	0	1
ENSG00000006062	MAP3K14	protein_coding	5852	-0.202564	0.870202	-1.50962	NA	-0.712873	1	0.225488	0.918988	1.84414	NA	1.25083	1	0.0897875	0.947011	-1.60037	NA	-0.520764	1	0.65481	0.454231	1.11437	NA	0.902814	1
ENSG00000006071	ABCC8	protein_coding	6778	0.788117	0.611325	-0.815243	NA	0.198577	1	0.395951	0.851939	0.583503	NA	0.492772	1	-0.159163	0.924647	-1.77289	NA	-0.751262	1	0.345052	0.837709	-0.71004	NA	-0.0881168	1
ENSG00000006116	CACNG3	protein_coding	3088	2.1359	0.414539	-2.76873	NA	1.18328	1	-0.386528	0.899767	-3.56556	0.0620577	-1.23543	1	1.89996	NA	-1.24585	NA	1.0544	1	2.1043	0.296711	-0.0572396	NA	1.39533	1
ENSG00000006118	TMEM132A	protein_coding	7271	1.27751	0.000732972	0.0771164	0.936026	0.798715	1	1.76577	5.36055e-06	0.449393	0.498913	1.25279	1	1.0396	0.00136038	-0.250023	0.78298	0.534333	1	1.38118	1.11597e-07	-0.416964	0.645817	0.745799	1
ENSG00000006125	AP2B1	protein_coding	7587	1.57551	2.00982e-11	2.15433	4.74798e-08	1.89376	2.375e-08	1.76161	1.90034e-09	2.08914	1.03479e-08	1.93465	6.12413e-09	1.94943	8.33499e-21	1.4879	0.00793937	1.73705	0.00396968	2.16087	3.04037e-33	1.75125	0.00952338	1.97055	0.00476169
ENSG00000006128	TAC1	protein_coding	1888	-0.686905	NA	-3.42142	NA	-1.48495	1	-2.29552	NA	-1.53274	NA	-1.86429	1	-2.07411	0.0839009	-3.07056	NA	-2.48796	1	-1.04684	0.382025	-0.850406	NA	-0.945282	1
ENSG00000006194	ZNF263	protein_coding	6945	0.409658	0.587776	0.481007	0.794107	0.445773	1	0.96841	0.190269	2.32815	0.110832	1.80288	1	0.695436	0.435859	-0.249086	NA	0.299129	1	0.660769	0.308799	0.16843	0.938126	0.435501	1
ENSG00000006210	CX3CL1	protein_coding	5983	-0.687829	0.675104	-0.337925	NA	-0.502295	1	0.505136	0.871133	-2.067	0.294116	-0.270632	1	0.427851	0.803804	2.70807	NA	1.97814	1	-0.388107	0.728351	1.54412	NA	0.87986	1
ENSG00000006282	SPATA20	protein_coding	5337	2.37636	6.59363e-05	3.39175	0.0586921	2.9716	1	2.52999	0.000227588	3.54628	0.00377417	3.12583	0.00200088	2.03677	0.00678815	4.77008	NA	3.97219	1	2.67472	1.26787e-05	1.69549	0.327347	2.26664	1
ENSG00000006283	CACNA1G	protein_coding	9709	2.4997	6.0701e-05	1.16065	0.438246	1.98026	1	2.85841	0.000986306	1.77747	0.221222	2.4169	1	1.83966	0.000188329	1.56577	0.318793	1.70921	1	2.97234	1.39428e-05	0.884348	0.606405	2.27709	1
ENSG00000006327	TNFRSF12A	protein_coding	1848	-1.64469	0.356669	-1.81805	NA	-1.72877	1	-2.23547	0.303419	0.226943	NA	-0.532507	1	-0.984427	0.53802	1.36365	NA	0.622357	1	-0.527453	0.63279	-0.752447	NA	-0.635569	1
ENSG00000006377	DLX6	protein_coding	3449	-1.95621	0.315497	-2.19674	NA	-2.07147	1	0.493376	NA	-1.60905	NA	-0.204608	1	-0.522866	0.41996	-2.19137	0.0390846	-1.12826	1	-0.459851	0.318139	-1.39527	0.197094	-0.853038	1
ENSG00000006432	MAP3K9	protein_coding	12386	-0.0138827	0.982385	-0.101035	0.932484	-0.0568009	1	0.521631	0.488666	1.0388	0.364464	0.803268	1	0.717739	0.0218284	0.643405	0.497116	0.681051	1	0.97535	0.000159913	1.10084	0.277112	1.03946	1
ENSG00000006451	RALA	protein_coding	3665	-1.83361	0.000130517	-0.25308	0.894982	-0.836934	1	-0.590199	0.453084	-0.69328	0.579377	-0.640819	1	-1.53173	0.00407933	-0.0720503	NA	-0.624657	1	-1.05119	0.0154451	-0.921205	0.507298	-0.984733	1
ENSG00000006453	BAIAP2L1	protein_coding	4798	1.30225	0.0557254	0.137305	0.941932	0.8343	1	0.869123	0.624027	-0.021517	0.99468	0.491467	1	1.06368	0.554282	0.279396	NA	0.724191	1	2.2316	0.317964	0.294348	NA	1.5663	1
ENSG00000006459	KDM7A	protein_coding	9430	-0.073383	0.883641	0.819334	0.418456	0.440951	1	-0.0942847	0.885951	0.418251	0.648299	0.184625	1	-0.288522	0.484283	0.0448387	0.973468	-0.112234	1	-0.0914883	0.785529	0.275387	0.811166	0.10358	1
ENSG00000006468	ETV1	protein_coding	9616	-0.956151	0.0331037	-0.660916	0.534987	-0.800995	1	-1.05821	0.0546681	0.051156	0.974734	-0.399422	1	-0.832497	0.193939	-0.719149	0.704302	-0.77471	1	-0.564718	0.421225	-0.393279	0.865145	-0.476453	1
ENSG00000006530	AGK	protein_coding	6547	-0.850133	0.138065	-0.581937	0.687325	-0.709812	1	-0.74063	0.380137	0.450731	0.81792	-0.0253164	1	-0.650499	0.369717	-0.979265	0.545666	-0.805537	1	-1.31631	0.0121247	-0.267308	NA	-0.698497	1
ENSG00000006534	ALDH3B1	protein_coding	6626	-1.45375	NA	-1.47167	NA	-1.46268	1	NA	NA	-3.21968	NA	0	1	NA	NA	-3.0458	NA	0	1	-0.741642	NA	-3.49112	NA	-1.54163	1
ENSG00000006555	TTC22	protein_coding	6055	4.04987	0.100708	-0.670008	NA	3.1036	1	3.47516	NA	-2.95855	NA	2.49175	1	2.57443	NA	-0.139969	NA	1.77903	1	0.763428	NA	-2.5276	NA	-0.0962323	1
ENSG00000006576	PHTF2	protein_coding	8646	-0.344771	0.491794	0.79396	0.513799	0.334145	1	-0.10182	0.901176	1.83429	0.178328	1.16923	1	-0.39432	0.452175	0.283214	0.862759	-0.0161393	1	-0.381117	0.318955	0.4571	0.763801	0.0980306	1
ENSG00000006606	CCL26	protein_coding	706	NA	NA	NA	NA	0	1	NA	NA	NA	NA	0	1	NA	NA	NA	NA	0	1	NA	NA	NA	NA	0	1
ENSG00000006607	FARP2	protein_coding	14413	1.50052	0.00570398	1.12946	0.394494	1.32688	1	1.6414	0.0562717	0.619144	0.699806	1.21898	1	0.839191	0.274923	0.26999	NA	0.582481	1	1.22595	0.0328918	-0.158593	0.934712	0.69376	1
ENSG00000006611	USH1C	protein_coding	4904	2.08276	NA	-1.94602	NA	1.16855	1	0.683345	NA	-2.38834	NA	-0.154521	1	-0.266512	NA	-1.26744	NA	-0.681859	1	0.992856	NA	-1.77155	NA	0.19094	1
ENSG00000006625	GGCT	protein_coding	1597	-1.3299	0.190857	-1.0229	NA	-1.16825	1	-1.79177	0.299348	-1.3658	NA	-1.56312	1	-1.92327	0.222204	0.132933	NA	-0.556207	1	-1.96193	0.191104	0.611521	NA	-0.164437	1
ENSG00000006634	DBF4	protein_coding	4583	-0.450856	0.475217	1.0591	0.52948	0.493257	1	0.0932283	0.955122	1.26308	0.582304	0.79362	1	0.319033	0.816653	2.4147	NA	1.71799	1	-0.391863	0.623042	2.27656	NA	1.48732	1
ENSG00000006638	TBXA2R	protein_coding	2793	-0.0262819	NA	NA	NA	0	1	-0.542002	NA	-1.4401	NA	-0.922266	1	1.48924	NA	-1.3335	NA	0.679969	1	1.758	NA	-1.00336	NA	0.956473	1
ENSG00000006652	IFRD1	protein_coding	7489	0.195588	0.685434	1.54757	0.157922	1.02447	1	-0.0759155	0.913405	0.75061	0.439364	0.395745	1	0.242479	0.607901	0.670715	0.582453	0.472428	1	0.342094	0.334099	0.0953038	0.944387	0.22397	1
ENSG00000006659	LGALS14	protein_coding	1079	0.835448	NA	-2.32466	NA	-0.0115634	1	NA	NA	-3.487	NA	0	1	1.85666	NA	-2.6068	NA	0.920614	1	1.04281	NA	-2.92194	NA	0.13237	1
ENSG00000006695	COX10	protein_coding	3172	-0.220781	0.818698	-0.29666	NA	-0.258222	1	0.217278	0.868411	0.521142	0.814513	0.377195	1	0.539682	0.652043	0.446929	NA	0.494051	1	0.386125	0.648232	1.16623	NA	0.828275	1
ENSG00000006704	GTF2IRD1	protein_coding	6498	1.29506	0.000364955	1.05626	0.180498	1.1806	1	1.88451	2.511e-06	1.90146	0.00791406	1.89301	0.00395828	0.778932	0.0550259	1.34497	0.240849	1.08954	1	1.37059	4.32464e-06	0.446393	0.690859	0.981264	1
ENSG00000006712	PAF1	protein_coding	2668	1.07282	0.0952811	1.44974	0.388959	1.27355	1	1.76455	0.0392115	0.164938	0.926455	1.17594	1	1.89182	0.000734473	-0.155539	0.922659	1.2044	1	1.61692	0.00200021	1.12186	0.542346	1.39052	1
ENSG00000006715	VPS41	protein_coding	7801	1.35775	4.01678e-07	1.92457	0.000337681	1.66882	0.000169042	1.2706	0.00040117	1.85859	0.000281787	1.59434	0.000341478	1.25004	6.41577e-05	0.93427	0.252963	1.10078	1	1.4732	4.14886e-11	0.787	0.388809	1.17052	1
ENSG00000006740	ARHGAP44	protein_coding	9281	0.905305	0.253436	2.2138	NA	1.70308	1	1.06505	0.326442	1.86232	0.351696	1.51807	1	1.12545	0.0920786	3.09823	NA	2.42564	1	1.45071	0.0181857	1.60747	NA	1.53122	1
ENSG00000006744	ELAC2	protein_coding	6345	1.3913	0.00193709	0.757154	0.493344	1.10879	1	1.72056	0.00149848	1.11644	0.2021	1.44989	1	1.33638	0.0594418	0.120162	0.952683	0.85281	1	1.66083	0.00207113	1.90499	0.264753	1.78807	1
ENSG00000006747	SCIN	protein_coding	11623	3.33955	0.212866	-2.5451	NA	2.36376	1	2.52537	NA	-1.97049	NA	1.58794	1	-1.18665	NA	-4.51012	NA	-2.04928	1	-2.14572	NA	NA	NA	0	1
ENSG00000006756	ARSD	protein_coding	7030	-0.797941	0.590764	-0.446093	NA	-0.611317	1	-0.877824	0.630158	-1.50079	NA	-1.15594	1	-1.66771	0.388719	-1.95625	NA	-1.80478	1	-1.3412	0.219415	0.716093	NA	0.0267433	1
ENSG00000006757	PNPLA4	protein_coding	3441	-2.45984	0.0715997	-2.58198	NA	-2.51961	1	-0.36262	0.855298	1.58308	NA	0.916032	1	0.669594	0.718879	1.00315	NA	0.84599	1	-0.503341	0.729245	0.483938	NA	0.0731532	1
ENSG00000006788	MYH13	protein_coding	6120	2.32029	NA	-2.93703	NA	1.35753	1	0.651708	NA	-2.38654	NA	-0.182567	1	0.56728	NA	-3.28367	NA	-0.33605	1	1.79437	NA	-2.68956	NA	0.857444	1
ENSG00000006831	ADIPOR2	protein_coding	5878	-0.918077	0.0685711	-0.345657	0.820364	-0.603662	1	0.0229728	0.983648	-0.90931	0.363808	-0.369137	1	-0.514917	0.473632	0.160848	NA	-0.137825	1	-0.35517	0.517094	-0.495201	0.764522	-0.423487	1
ENSG00000006837	CDKL3	protein_coding	3057	-4.32256	0.0229453	-3.13121	NA	-3.60725	1	-3.59931	0.120054	-1.71156	NA	-2.36647	1	-2.98164	0.0474374	0.0750326	NA	-0.761231	1	-2.41853	0.0343957	-1.79062	NA	-2.07068	1
ENSG00000007001	UPP2	protein_coding	2957	NA	NA	NA	NA	0	1	0.474498	NA	-1.53274	NA	-0.205018	1	-0.688851	NA	-2.71028	NA	-1.37118	1	-1.54902	NA	NA	NA	0	1
ENSG00000007038	PRSS21	protein_coding	1967	2.90809	NA	-2.58921	NA	1.93968	1	0.629622	NA	-3.41017	NA	-0.285226	1	0.586678	NA	-1.3335	NA	-0.0750724	1	1.1292	NA	-1.65969	NA	0.324165	1
ENSG00000007047	MARK4	protein_coding	6668	1.63999	3.33757e-06	2.05464	0.0098003	1.86216	0.00490182	1.77732	0.000109533	1.92866	0.00266892	1.85498	0.00138923	1.50204	2.2793e-06	1.13086	0.181607	1.32836	1	1.73439	2.27542e-10	0.532946	0.610287	1.25528	1
ENSG00000007062	PROM1	protein_coding	7434	0.344983	0.575236	0.143781	0.929126	0.247887	1	1.21034	0.602117	1.91495	NA	1.60524	1	0.529837	0.708186	1.03524	NA	0.80456	1	-0.140933	0.909149	1.88307	NA	1.20023	1
ENSG00000007080	CCDC124	protein_coding	1660	-0.20907	0.879787	-2.62156	0.0235588	-0.96074	1	1.03677	0.547679	-0.384094	0.881103	0.494611	1	0.382407	0.73226	-2.19003	0.0557255	-0.393404	1	0.926123	0.359696	-2.76795	0.0121365	0.0334945	1
ENSG00000007129	CEACAM21	protein_coding	1964	NA	NA	NA	NA	0	1	0.651708	NA	-1.4643	NA	-0.0488318	1	-1.54813	NA	-0.907264	NA	-1.1924	1	NA	NA	NA	NA	0	1
ENSG00000007168	PAFAH1B1	protein_coding	8127	-0.329149	0.231073	0.0432775	0.953796	-0.130951	1	-0.486531	0.279952	-0.0739808	0.923608	-0.26556	1	-0.334781	0.165014	-0.258938	0.712714	-0.296361	1	-0.364299	0.0757999	-0.217562	0.818905	-0.289066	1
ENSG00000007171	NOS2	protein_coding	4176	2.11463	3.60005e-07	2.8295	0.00369322	2.5159	0.00184679	2.64006	0.000409876	1.78874	0.0847598	2.2763	1	2.94431	0.100388	2.77642	NA	2.86281	1	4.49195	6.98061e-05	2.54368	NA	3.82438	1
ENSG00000007174	DNAH9	protein_coding	16980	2.22876	0.138364	-0.981346	NA	1.3768	1	1.09753	0.655467	-0.956451	NA	0.408826	1	1.64167	0.12156	-0.0177139	NA	1.03846	1	-0.220626	0.918688	-2.06732	NA	-0.866705	1
ENSG00000007202	KIAA0100	protein_coding	9235	3.13546	2.14975e-49	2.84326	2.46955e-18	2.99675	1.23478e-18	3.0446	4.29364e-20	2.70079	9.54931e-21	2.88291	2.62428e-20	3.26585	1.61655e-57	1.80577	0.000259385	2.71314	0.000129692	3.3372	6.89612e-77	2.81855	1.18139e-06	3.10106	5.90693e-07
ENSG00000007216	SLC13A2	protein_coding	3226	2.06352	NA	-2.84009	NA	1.11093	1	-0.268131	0.961105	-2.92678	NA	-1.05604	1	NA	NA	-3.0458	NA	0	1	NA	NA	NA	NA	0	1
ENSG00000007237	GAS7	protein_coding	10100	0.135441	0.892384	-0.538726	0.74188	-0.162616	1	0.943897	0.604356	1.00338	NA	0.973945	1	0.145573	0.83591	0.640347	0.705548	0.414067	1	0.736841	0.34711	-0.797965	0.63917	0.164582	1
ENSG00000007255	TRAPPC6A	protein_coding	933	-0.440433	0.750916	0.76165	NA	0.282346	1	-0.329614	0.885649	-2.0293	0.298448	-0.942413	1	0.385067	0.9081	0.753411	NA	0.580963	1	-0.931544	0.620638	0.820844	NA	0.195811	1
ENSG00000007264	MATK	protein_coding	4141	-0.0334851	NA	-1.61687	NA	-0.618052	1	1.63665	0.552849	0.954312	NA	1.33545	1	2.60169	NA	-0.842327	NA	1.72852	1	0.976381	NA	-1.19425	NA	0.265759	1
ENSG00000007306	CEACAM7	protein_coding	2649	1.68758	NA	-2.32466	NA	0.77433	1	NA	NA	NA	NA	0	1	NA	NA	NA	NA	0	1	NA	NA	NA	NA	0	1
ENSG00000007312	CD79B	protein_coding	2080	2.10629	NA	-1.86188	NA	1.19565	1	1.65539	NA	-1.82594	NA	0.77911	1	1.45133	NA	-4.28216	NA	0.478197	1	1.32057	NA	-3.12072	NA	0.385497	1
ENSG00000007314	SCN4A	protein_coding	8243	1.52657	0.455509	-0.585313	NA	0.826801	1	1.33672	0.440451	1.59757	NA	1.47303	1	0.908356	NA	-1.02067	NA	0.244761	1	0.0235456	0.993687	-0.641882	NA	-0.271139	1
ENSG00000007341	ST7L	protein_coding	8111	-2.00109	0.00437827	-2.17045	0.109382	-2.08328	1	-2.28074	0.0384323	-2.28008	0.166852	-2.28041	1	-1.70826	0.0199574	0.718374	NA	-0.0355233	1	-2.15855	0.0020448	-2.69911	0.0444781	-2.40366	1
ENSG00000007350	TKTL1	protein_coding	3650	1.50383	0.177659	1.71969	NA	1.61579	1	-0.505204	NA	-2.74038	NA	-1.22734	1	1.18927	NA	-0.78612	NA	0.516156	1	NA	NA	-3.94993	NA	0	1
ENSG00000007372	PAX6	protein_coding	20812	-0.565158	0.0456664	-0.519881	0.400014	-0.542342	1	0.0691036	0.96537	-0.840261	0.604803	-0.315085	1	-0.726507	0.00474578	-0.840916	0.240122	-0.782578	1	-0.242977	0.869591	-1.47606	NA	-0.731603	1
ENSG00000007376	RPUSD1	protein_coding	2769	-0.294572	0.85291	-0.267969	NA	-0.281209	1	0.548749	0.813593	-1.31055	0.552518	-0.100064	1	0.181392	0.909113	0.748395	NA	0.492571	1	0.945806	0.388307	0.418195	NA	0.705986	1
ENSG00000007384	RHBDF1	protein_coding	4914	0.851002	0.25267	-0.243989	0.886382	0.404991	1	1.13529	0.208071	0.122922	0.942898	0.716144	1	0.903874	0.619102	-0.115766	NA	0.482319	1	1.00571	0.202633	3.27159	NA	2.54412	1
ENSG00000007392	LUC7L	protein_coding	6176	-1.31964	0.000597428	-0.981207	0.271159	-1.14052	1	-1.46834	0.00125794	-1.68879	0.00744394	-1.57436	1	-1.15262	0.000956789	-1.54021	0.0426845	-1.33344	1	-1.76704	7.60883e-08	-1.90639	0.0262267	-1.83503	1
ENSG00000007402	CACNA2D2	protein_coding	6322	0.794753	0.200587	-1.31383	0.114662	0.0956079	1	0.90246	0.149379	-0.280587	0.802593	0.42895	1	-0.342139	0.59672	-1.4573	0.135427	-0.794552	1	0.425795	0.383437	0.346663	0.838486	0.386772	1
ENSG00000007516	BAIAP3	protein_coding	6146	2.19156	0.00165391	1.17279	0.389635	1.77029	1	1.74037	0.0100109	-0.27015	0.818586	1.0602	1	0.704398	0.081333	-0.35248	0.722042	0.270649	1	1.56529	1.67175e-07	0.62675	0.590075	1.17103	1
ENSG00000007520	TSR3	protein_coding	1243	1.24092	0.0954597	0.354167	0.850184	0.864629	1	2.53161	0.0199967	0.176595	0.925609	1.78918	1	0.926045	0.256482	0.619951	NA	0.7811	1	1.72256	0.0211942	0.332017	0.870803	1.18872	1
ENSG00000007541	PIGQ	protein_coding	7904	-0.219567	0.773019	-0.931477	0.405669	-0.532048	1	0.546923	0.520497	-0.763568	0.458111	0.0356267	1	0.256145	0.730288	-0.673911	0.644455	-0.135199	1	0.11181	0.86434	-1.54015	0.150322	-0.489613	1
ENSG00000007545	CRAMP1	protein_coding	8373	0.980945	0.0351575	1.36236	0.21193	1.18422	1	0.0511504	0.961105	-0.555162	0.620898	-0.220386	1	1.11485	0.0226837	0.95707	0.536001	1.03812	1	1.36947	0.00075137	2.37528	0.11131	1.95831	1
ENSG00000007866	TEAD3	protein_coding	3046	0.190442	0.833335	0.572203	0.771859	0.393914	1	0.236912	0.849372	-0.217762	0.917724	0.0274131	1	0.211156	0.879368	3.2344	NA	2.40176	1	0.461355	0.681275	0.529331	NA	0.495743	1
ENSG00000007908	SELE	protein_coding	4585	1.75126	NA	-1.37783	NA	0.907397	1	0.309205	NA	-1.4401	NA	-0.315121	1	NA	NA	-3.08032	NA	0	1	0.0823838	NA	-3.43367	NA	-0.79672	1
ENSG00000007923	DNAJC11	protein_coding	5083	0.840724	0.133736	0.402485	0.778177	0.638181	1	0.592638	0.461511	-0.136318	0.93123	0.273719	1	1.04115	0.0905729	-0.139596	0.933339	0.568343	1	1.72233	0.000613662	1.4942	0.29657	1.61277	1
ENSG00000007933	FMO3	protein_coding	3463	NA	NA	NA	NA	0	1	NA	NA	NA	NA	0	1	NA	NA	NA	NA	0	1	-1.12746	NA	NA	NA	0	1
ENSG00000007944	MYLIP	protein_coding	3033	-0.577531	0.626616	2.75592	NA	1.89238	1	0.714195	0.732475	1.41269	NA	1.10531	1	0.249075	0.884481	0.621278	NA	0.447147	1	0.701246	0.430467	1.09131	NA	0.90942	1
ENSG00000007952	NOX1	protein_coding	2529	-0.06512	NA	NA	NA	0	1	-1.3286	NA	NA	NA	0	1	NA	NA	NA	NA	0	1	0.9398	NA	-1.81579	NA	0.139019	1
ENSG00000007968	E2F2	protein_coding	5457	0.174503	0.86426	0.845516	NA	0.548675	1	0.229852	0.877302	2.0021	NA	1.37255	1	0.514482	0.780429	1.76277	NA	1.26962	1	-1.17019	0.521339	0.553147	NA	-0.0651852	1
ENSG00000008018	PSMB1	protein_coding	2256	0.282874	0.611358	1.23543	0.327325	0.836379	1	1.26261	0.0440858	0.791094	0.461724	1.04603	1	0.391239	0.677985	1.81513	NA	1.27215	1	0.985862	0.0933884	0.652615	0.741207	0.828839	1
ENSG00000008056	SYN1	protein_coding	3822	1.60936	0.0782018	2.69003	NA	2.2486	1	1.28376	0.29692	1.6144	0.483552	1.45853	1	2.32404	1.80085e-07	1.6071	0.187236	2.00965	1	1.93369	3.87291e-07	0.870214	0.482208	1.4978	1
ENSG00000008083	JARID2	protein_coding	6015	1.5466	1.0588e-10	1.35972	0.00317496	1.45618	0.00158748	1.87404	1.05577e-11	1.00359	0.00669281	1.50349	0.00334641	1.31117	3.2872e-06	1.53717	0.0652231	1.42859	1	1.61623	2.96914e-14	2.14895	0.0506272	1.90704	1
ENSG00000008086	CDKL5	protein_coding	17075	0.120944	0.83916	0.597869	0.642045	0.379025	1	-0.00286663	0.997813	-0.567539	0.629274	-0.257751	1	0.52501	0.20465	1.15242	0.311906	0.872557	1	0.289138	0.490393	0.238094	0.872389	0.263841	1
ENSG00000008118	CAMK1G	protein_coding	2676	-0.331766	0.839383	-2.2909	NA	-1.00157	1	1.01848	0.66776	-1.49611	NA	0.251141	1	0.37417	0.812355	2.19466	NA	1.55432	1	1.30709	0.202468	3.52528	NA	2.80613	1
ENSG00000008128	CDK11A	protein_coding	4701	0.483095	NA	-1.41608	NA	-0.17424	1	2.24492	NA	-0.559038	NA	1.43799	1	-1.11313	NA	-3.20604	NA	-1.80932	1	-1.47688	NA	-1.4327	NA	-1.45462	1
ENSG00000008130	NADK	protein_coding	5570	0.903318	0.129254	1.50932	0.296654	1.2379	1	1.71712	0.0136517	1.90339	0.122697	1.81326	1	1.45382	0.0145877	1.39054	NA	1.42253	1	1.66124	0.00108947	1.21846	0.473131	1.45677	1
ENSG00000008196	TFAP2B	protein_coding	6149	-2.20445	0.381178	-2.19333	NA	-2.19888	1	-0.916278	0.711564	-0.483871	NA	-0.683934	1	1.18634	0.648261	0.789393	NA	1.00148	1	-1.42379	NA	-1.70133	NA	-1.55589	1
ENSG00000008197	TFAP2D	protein_coding	1856	NA	NA	-3.18064	NA	0	1	0.309205	NA	-2.51251	NA	-0.499937	1	NA	NA	NA	NA	0	1	-0.741642	NA	-3.54255	NA	-1.54819	1
ENSG00000008226	DLEC1	protein_coding	8338	-0.594572	0.794787	-1.28731	NA	-0.899755	1	-0.0115711	0.996583	2.13127	NA	1.42574	1	1.23794	NA	0.570826	NA	0.942605	1	0.614355	0.826193	-0.140465	NA	0.285758	1
ENSG00000008256	CYTH3	protein_coding	5808	1.38034	0.00547375	0.295084	0.825161	0.937443	1	1.74543	0.0206068	0.611518	0.640657	1.28712	1	1.98086	3.02306e-06	0.944402	0.417764	1.55377	1	1.78464	1.91814e-06	0.628312	0.622408	1.31935	1
ENSG00000008277	ADAM22	protein_coding	12199	-0.645338	0.175147	-0.724144	0.433498	-0.684203	1	-0.930366	0.114963	-0.742256	0.498296	-0.833247	1	-1.17027	0.000162091	-0.0523833	0.972773	-0.505656	1	-1.29484	4.48826e-05	-1.26192	0.180517	-1.27829	1
ENSG00000008282	SYPL1	protein_coding	2804	-2.12585	0.000159452	-0.408242	NA	-1.02524	1	-1.08007	0.172266	0.448729	0.824802	-0.121986	1	-1.19148	0.285315	0.189223	NA	-0.3419	1	-1.51153	0.0240282	0.449614	NA	-0.220601	1
ENSG00000008283	CYB561	protein_coding	5320	-0.369315	0.802726	0.420096	NA	0.0787236	1	0.161891	0.953267	-1.0616	NA	-0.323865	1	-0.674829	0.645603	-1.93253	NA	-1.17076	1	0.0853074	0.953103	2.57865	NA	1.81449	1
ENSG00000008294	SPAG9	protein_coding	11963	1.27011	4.05801e-09	1.26985	0.000413611	1.26998	0.000206807	0.760026	0.0272632	0.976033	0.00961612	0.872069	0.0184396	1.68124	9.83916e-20	1.17565	0.0125851	1.45048	0.00629256	1.57446	2.29006e-19	1.06314	0.115447	1.34133	1
ENSG00000008300	CELSR3	protein_coding	13873	3.65593	1.04338e-65	2.60187	2.86732e-13	3.2231	1.43366e-13	3.61861	4.65078e-33	2.45494	4.1622e-15	3.15105	2.0811e-15	3.40345	3.89659e-86	2.57519	1.40753e-08	3.04796	7.03763e-09	3.82792	8.13365e-67	2.37257	1.06116e-05	3.27647	5.30582e-06
ENSG00000008311	AASS	protein_coding	4591	0.424523	0.253351	-0.0569509	0.951178	0.203779	1	0.0900292	0.912355	-0.0284981	0.97948	0.0319824	1	0.65679	0.35649	-0.35967	0.838809	0.236286	1	0.393767	0.416534	2.28737	0.169275	1.63121	1
ENSG00000008323	PLEKHG6	protein_coding	4260	0.639401	NA	-2.85787	NA	-0.238184	1	-0.893882	NA	-1.1508	NA	-1.01663	1	0.530977	NA	-2.08966	NA	-0.251673	1	1.32296	NA	-2.20133	NA	0.443195	1
ENSG00000008324	SS18L2	protein_coding	1298	-0.674888	0.627014	1.28947	NA	0.618597	1	-1.06349	0.627341	-1.25753	NA	-1.15725	1	0.279282	0.908284	-0.895546	NA	-0.19171	1	-1.54594	0.348048	-1.42761	NA	-1.48556	1
ENSG00000008382	MPND	protein_coding	2049	1.05931	0.107008	1.94622	0.265799	1.56987	1	2.42234	0.0257864	1.69335	0.32308	2.10341	1	1.07686	0.227839	-0.207459	NA	0.573131	1	1.38391	0.0453443	-0.266903	0.898486	0.782766	1
ENSG00000008394	MGST1	protein_coding	7440	-1.75843	0.0462234	-0.0270538	NA	-0.647251	1	-1.20302	0.0517857	-1.35434	0.104926	-1.2767	1	-1.604	0.154572	1.5125	NA	0.669937	1	-1.25458	0.0323425	1.87467	NA	1.0308	1
ENSG00000008405	CRY1	protein_coding	5062	0.959191	0.121337	0.269628	0.859226	0.655222	1	0.75077	0.261619	-0.503655	0.614706	0.255808	1	0.36186	0.652555	3.92839	NA	3.04529	1	1.14709	0.015302	1.30286	0.405573	1.22707	1
ENSG00000008438	PGLYRP1	protein_coding	720	1.75126	NA	-3.45927	NA	0.789704	1	0.474498	NA	-2.81938	NA	-0.385425	1	2.2697	NA	-1.87932	NA	1.34881	1	NA	NA	NA	NA	0	1
ENSG00000008441	NFIX	protein_coding	6302	-0.415905	0.885381	-3.29676	NA	-1.23224	1	-1.82572	0.482065	-3.6693	NA	-2.47112	1	-0.848613	0.774873	-0.803978	NA	-0.826123	1	0.895954	NA	-1.02077	NA	0.234927	1
ENSG00000008513	ST3GAL1	protein_coding	8729	0.644082	0.596571	-1.30091	0.440576	-0.022819	1	0.181735	0.937519	-0.961095	NA	-0.279359	1	0.479198	0.767435	-1.38919	NA	-0.171574	1	0.700043	0.533387	-0.420218	NA	0.246022	1
ENSG00000008516	MMP25	protein_coding	4126	2.80532	0.269155	-2.6279	NA	1.83833	1	2.11622	NA	-1.72572	NA	1.21348	1	2.72266	0.293768	-0.283905	NA	1.89185	1	-0.558987	NA	-2.14484	NA	-1.14417	1
ENSG00000008517	IL32	protein_coding	3209	NA	NA	-3.95129	NA	0	1	-2.2023	NA	-3.58426	NA	-2.73377	1	2.46463	NA	-0.150605	NA	1.68274	1	0.15292	0.938433	-0.817799	NA	-0.252291	1
ENSG00000008710	PKD1	protein_coding	18532	2.27362	1.29225e-15	-0.403518	0.399678	1.4832	1	2.45214	4.59883e-11	0.600767	0.276666	1.80504	1	1.97041	6.55192e-15	0.307692	0.725304	1.3664	1	2.145	2.02908e-15	0.430479	0.652735	1.52872	1
ENSG00000008735	MAPK8IP2	protein_coding	5901	2.78368	0.0212324	1.98984	0.0182255	2.44069	0.0197289	1.49755	0.0398935	1.58485	0.174612	1.54186	1	1.50072	3.432e-06	0.172234	0.870083	0.984275	1	2.07425	1.36667e-12	1.64716	0.0630395	1.87645	1
ENSG00000008838	MED24	protein_coding	6962	1.45565	1.9145e-07	1.75865	0.0119113	1.61509	0.00595577	1.77252	1.82526e-05	1.91839	0.000480917	1.8473	0.000249585	1.51743	7.40464e-07	0.652141	0.461742	1.14871	1	1.68116	1.67151e-09	1.38652	0.140016	1.54135	1
ENSG00000008853	RHOBTB2	protein_coding	6580	1.71435	0.000108355	1.49921	0.13654	1.61079	1	1.87543	0.0255883	0.122324	0.938664	1.25023	1	2.1682	6.72088e-15	1.82438	0.0153081	2.00651	0.00765403	2.26536	1.48745e-17	0.566427	0.583643	1.65274	1
ENSG00000008869	HEATR5B	protein_coding	8206	2.42901	9.6886e-18	1.9203	0.000698907	2.19696	0.000349453	2.51391	1.75332e-09	2.97677	3.33947e-07	2.76382	1.6785e-07	2.49992	7.57328e-20	1.79818	0.00944966	2.1913	0.00472483	2.75602	2.67992e-31	1.91344	0.0165508	2.39539	0.00827541
ENSG00000008952	SEC62	protein_coding	7928	-0.758218	0.021104	0.165965	0.876581	-0.223355	1	-0.735776	0.128959	-0.0423912	0.970223	-0.347822	1	-0.832567	0.00347492	-0.881436	0.298479	-0.856794	1	-0.821709	0.00041214	-0.427694	0.681548	-0.611292	1
ENSG00000008988	RPS20	protein_coding	3002	-1.1326	0.00228727	-1.85078	0.000301747	-1.44745	1	-1.02811	0.0252524	-1.2134	0.0490837	-1.11778	1	-1.09911	0.0210952	-1.08037	0.399962	-1.08971	1	-0.943671	0.00957589	-1.34276	0.203224	-1.12946	1
ENSG00000009307	CSDE1	protein_coding	5778	2.0325	1.80378e-15	2.11599	1.14414e-12	2.07485	5.7297e-13	1.84649	4.80891e-15	2.45621	3.80225e-20	2.18333	2.40447e-15	2.11639	2.45053e-29	1.76477	5.44559e-05	1.95126	2.7228e-05	2.34072	8.17024e-56	2.00393	0.000798762	2.18213	0.000399381
ENSG00000009335	UBE3C	protein_coding	9220	1.17567	7.2898e-05	0.87365	0.21243	1.03255	1	0.936523	0.0189177	1.40466	0.0420687	1.1895	0.0304932	1.43713	3.90408e-07	0.216409	0.824313	0.952202	1	1.53339	1.04595e-08	1.81121	0.0525809	1.67898	1
ENSG00000009413	REV3L	protein_coding	12425	0.979741	0.000288704	1.52401	0.00226546	1.27739	0.00127708	0.614875	0.105378	0.726932	0.234326	0.671992	1	2.00253	2.02468e-24	0.985954	0.105315	1.58199	1	1.99761	8.84192e-20	1.41349	0.057626	1.73492	1
ENSG00000009694	TENM1	protein_coding	12896	1.40545	0.0626487	-0.0888655	0.96355	0.843687	1	-0.329237	0.886046	-1.16248	NA	-0.686521	1	1.44974	5.98642e-09	1.7065	0.0112045	1.58382	0.00560227	1.45169	0.00378979	0.488698	0.795142	1.0491	1
ENSG00000009709	PAX7	protein_coding	6313	0.189511	0.892013	-0.735642	0.73691	-0.200144	1	0.0540808	0.987004	0.627265	NA	0.368954	1	-0.669845	NA	-0.120806	NA	-0.369364	1	2.19879	NA	-0.545063	NA	1.39952	1
ENSG00000009724	MASP2	protein_coding	4251	-0.0733754	NA	-1.47167	NA	-0.609358	1	1.31001	NA	-2.37814	NA	0.417802	1	1.45133	NA	-1.26744	NA	0.655353	1	0.152588	NA	-1.77155	NA	-0.509988	1
ENSG00000009765	IYD	protein_coding	10362	2.38684	NA	-2.97208	NA	1.42158	1	0.626914	NA	-3.49554	NA	-0.292546	1	3.59265	NA	0.328896	NA	2.73554	1	-0.440327	NA	-2.30035	NA	-1.0893	1
ENSG00000009780	FAM76A	protein_coding	4034	-2.33388	0.00366886	-0.941071	NA	-1.47554	1	-1.79312	0.136583	-1.43476	0.437304	-1.60284	1	-1.74684	0.0742365	0.771045	NA	0.00321215	1	-1.80848	0.0114895	-1.29263	NA	-1.52762	1
ENSG00000009790	TRAF3IP3	protein_coding	7750	-0.0262819	NA	-3.26027	NA	-0.880559	1	0.474498	NA	-1.53274	NA	-0.205018	1	NA	NA	NA	NA	0	1	-0.84818	NA	NA	NA	0	1
ENSG00000009830	POMT2	protein_coding	10008	0.56024	0.449376	0.0779356	0.965344	0.339149	1	0.901683	0.351392	0.108157	0.954346	0.558804	1	-0.269523	0.772926	0.215971	NA	-0.00644974	1	0.262161	0.709686	0.0341228	0.986883	0.152643	1
ENSG00000009844	VTA1	protein_coding	7262	-0.8931	0.06694	-0.924069	0.393558	-0.908501	1	-0.709257	0.298205	0.27978	0.858278	-0.131594	1	-1.23444	0.00743009	-0.195934	0.920343	-0.623692	1	-0.884984	0.0345692	0.807512	0.668103	0.196409	1
ENSG00000009950	MLXIPL	protein_coding	4815	0.519587	0.836716	-0.238198	NA	0.189886	1	1.26881	0.661038	-0.00407833	NA	0.768416	1	-1.06912	NA	-3.04699	NA	-1.74274	1	0.0823838	NA	-2.71865	NA	-0.72418	1
ENSG00000009954	BAZ1B	protein_coding	7053	2.84225	1.54315e-36	1.64516	3.48818e-06	2.36446	1.74409e-06	2.50036	7.80332e-20	1.50645	3.46257e-06	2.08736	1.73129e-06	3.15824	1.65099e-56	0.932069	0.102494	2.43768	1	3.22919	2.99835e-81	1.53546	0.0735626	2.6178	1
ENSG00000010017	RANBP9	protein_coding	3347	0.2793	0.515577	1.00944	0.25483	0.690076	1	0.492185	0.322014	1.72788	0.0364489	1.23848	1	0.854015	0.0240815	0.834395	0.425448	0.844238	1	1.08034	0.000149365	1.67049	0.0910793	1.40538	1
ENSG00000010030	ETV7	protein_coding	2374	-0.0875248	NA	-4.01442	NA	-0.995657	1	-1.96677	NA	-1.4643	NA	-1.69377	1	NA	NA	NA	NA	0	1	-1.59912	NA	NA	NA	0	1
ENSG00000010072	SPRTN	protein_coding	5906	-0.543903	0.451548	-0.472488	0.78679	-0.507754	1	-0.0284037	0.982487	0.174872	0.93233	0.0768113	1	-0.563277	0.534273	-1.36784	NA	-0.910185	1	-0.767279	0.186694	1.34071	NA	0.641677	1
ENSG00000010165	METTL13	protein_coding	3827	2.06609	7.23174e-06	0.638997	0.559319	1.52224	1	2.66489	6.68023e-05	2.73218	0.00739835	2.69893	0.00373258	2.0525	0.00408345	1.55215	NA	1.82391	1	2.20889	0.000131876	2.17319	NA	2.19115	1
ENSG00000010219	DYRK4	protein_coding	7054	-1.5011	0.297127	-2.74096	NA	-1.99174	1	-1.87116	0.139297	-1.375	NA	-1.60185	1	-2.211	0.314603	-2.47502	NA	-2.33698	1	-1.03638	0.419093	0.964333	NA	0.286119	1
ENSG00000010244	ZNF207	protein_coding	15834	-2.15063	2.51924e-21	-1.03641	0.0278167	-1.48853	1	-2.67048	9.67229e-25	-1.52479	0.000226865	-1.98677	1	-2.63169	2.717e-37	-0.836172	0.328862	-1.47096	1	-3.01599	9.21801e-59	-1.16584	0.146773	-1.81267	1
ENSG00000010256	UQCRC1	protein_coding	3236	2.46187	3.90729e-13	0.351045	0.657306	1.76231	1	2.89675	3.13749e-10	2.01951	0.0022772	2.5238	0.0011386	2.21987	8.75087e-06	0.248031	0.870968	1.54747	1	2.72043	9.97778e-12	1.02273	0.396933	2.1081	1
ENSG00000010270	STARD3NL	protein_coding	4348	-0.50698	0.362436	0.0699121	0.965253	-0.189889	1	0.0871887	0.933594	-0.707389	0.484475	-0.256075	1	-0.521635	0.469909	0.332255	NA	-0.0324168	1	-0.546117	0.297485	-1.24577	0.262031	-0.853939	1
ENSG00000010278	CD9	protein_coding	3299	-0.265634	0.916715	-2.36184	NA	-0.962441	1	0.186202	0.957762	0.109429	NA	0.148326	1	0.126055	0.971646	-1.66341	NA	-0.507379	1	-0.471172	0.888121	-1.27672	NA	-0.818437	1
ENSG00000010282	HHATL	protein_coding	2891	1.68758	NA	-1.47167	NA	0.840658	1	2.05602	NA	-1.10511	NA	1.20891	1	2.37377	NA	-2.3823	NA	1.4262	1	-0.123231	NA	-2.71865	NA	-0.902328	1
ENSG00000010292	NCAPD2	protein_coding	6487	3.0941	3.36738e-39	2.36457	3.63488e-11	2.77497	1.81744e-11	3.2354	3.28797e-26	2.74574	2.03766e-14	3.01125	1.01883e-14	3.17201	4.76092e-20	2.4771	0.00262568	2.866	0.00131284	3.5972	4.62169e-42	3.61691	7.50109e-05	3.60709	3.75054e-05
ENSG00000010295	IFFO1	protein_coding	5203	1.20427	0.0943942	0.322815	0.859594	0.829842	1	0.682046	0.482065	0.85804	0.619228	0.772725	1	0.424743	0.707996	-0.573734	NA	0.0102136	1	0.780604	0.312414	0.266752	NA	0.546435	1
ENSG00000010310	GIPR	protein_coding	4736	-0.662319	0.701596	0.661624	NA	0.146475	1	-2.19669	0.0354553	-1.17438	NA	-1.59682	1	-0.60538	0.513835	0.243595	NA	-0.119325	1	-2.07211	0.00369684	0.534731	NA	-0.245982	1
ENSG00000010318	PHF7	protein_coding	3367	-0.763925	0.583335	-1.63042	NA	-1.13307	1	-0.2689	0.901544	-0.918206	NA	-0.557329	1	-0.354472	0.826186	0.369166	NA	0.0522503	1	-0.927838	0.500428	-2.38496	NA	-1.47976	1
ENSG00000010319	SEMA3G	protein_coding	5011	0.683895	0.796011	-1.6787	NA	-0.0597694	1	2.18297	NA	-2.3206	NA	1.24521	1	1.83546	NA	-2.78138	NA	0.893089	1	1.81939	NA	-2.98431	NA	0.870141	1
ENSG00000010322	NISCH	protein_coding	9161	2.20585	2.1477e-24	1.99605	1.15902e-07	2.10476	5.79508e-08	2.63242	1.15589e-21	2.03666	4.29227e-09	2.36508	2.14614e-09	2.28365	2.80246e-28	2.02539	0.000282663	2.16029	0.000141332	2.71417	4.71177e-26	1.17414	0.0713135	2.14057	1
ENSG00000010327	STAB1	protein_coding	10588	3.39118	NA	-2.73048	NA	2.41176	1	-0.505204	NA	-4.32653	NA	-1.4066	1	0.829547	NA	-3.14203	NA	-0.0813029	1	1.79437	NA	-0.952277	NA	0.994745	1
ENSG00000010361	FUZ	protein_coding	2950	0.504554	0.665637	-0.684572	NA	0.0291879	1	1.79053	0.177304	1.15138	0.6239	1.50607	1	0.757485	0.616301	1.92741	NA	1.45792	1	0.652107	0.639283	1.6	NA	1.20254	1
ENSG00000010379	SLC6A13	protein_coding	4243	-1.62449	NA	-3.78232	NA	-2.33278	1	-1.83546	NA	-1.53274	NA	-1.67618	1	-1.85009	NA	-2.14177	NA	-1.98857	1	-2.74678	NA	-2.65548	NA	-2.70041	1
ENSG00000010404	IDS	protein_coding	9292	-2.29485	2.2893e-11	-1.27914	0.169428	-1.69939	1	-2.14305	2.35752e-07	-0.963594	0.291968	-1.43601	1	-2.75189	4.12133e-28	-0.193808	0.894438	-0.967545	1	-2.50876	1.24226e-28	-1.12466	0.28205	-1.65672	1
ENSG00000010438	PRSS3	protein_coding	1664	NA	NA	NA	NA	0	1	0.474498	NA	-1.53274	NA	-0.205018	1	NA	NA	NA	NA	0	1	NA	NA	NA	NA	0	1
ENSG00000010539	ZNF200	protein_coding	7498	-0.603236	0.598851	-1.35484	NA	-0.930636	1	0.237999	0.896511	-1.79529	0.164296	-0.446669	1	-0.71329	0.503894	-1.85088	NA	-1.17275	1	0.0460354	0.967477	0.19205	NA	0.120889	1
ENSG00000010610	CD4	protein_coding	4583	-2.40674	NA	-1.40845	NA	-1.82292	1	-1.56672	NA	-0.703823	NA	-1.0717	1	1.12142	NA	-1.5871	NA	0.326798	1	-0.378204	NA	-1.77155	NA	-0.912823	1
ENSG00000010626	LRRC23	protein_coding	3054	0.184805	0.925309	-1.94611	NA	-0.518518	1	-0.871698	0.641547	-1.01246	NA	-0.940362	1	0.0688378	0.972562	0.957958	NA	0.580835	1	-0.135171	0.924952	1.61045	NA	0.986971	1
ENSG00000010671	BTK	protein_coding	4575	1.11558	NA	-1.08895	NA	0.398854	1	-0.505204	NA	-1.53274	NA	-0.929362	1	NA	NA	NA	NA	0	1	0.98028	NA	-1.00336	NA	0.305495	1
ENSG00000010704	HFE	protein_coding	5675	-3.56342	NA	NA	NA	0	1	-1.50466	NA	-1.15772	NA	-1.32078	1	0.424248	NA	-1.28656	NA	-0.191163	1	-3.01095	NA	-3.49112	NA	-3.23115	1
ENSG00000010803	SCMH1	protein_coding	4447	-0.397281	0.475628	-0.354411	0.785679	-0.375687	1	-0.385274	0.719587	-0.392669	0.81792	-0.388967	1	0.0370726	0.961292	-1.21877	0.264537	-0.458307	1	0.107101	0.883809	-0.258804	0.898486	-0.0642822	1
ENSG00000010810	FYN	protein_coding	7411	1.9781	1.25496e-13	1.39031	0.00461041	1.71394	0.0023052	2.01824	2.48268e-09	1.30782	0.0106555	1.70632	0.00532774	2.22419	1.11474e-17	0.467455	0.540421	1.59816	1	2.55831	4.5105e-26	0.676035	0.398177	1.90456	1
ENSG00000010818	HIVEP2	protein_coding	10682	1.85118	2.91252e-08	1.17124	0.139345	1.5509	1	1.21297	0.0189267	1.08496	0.174003	1.15039	1	2.82153	4.72693e-27	1.79954	0.0177517	2.3992	0.00887585	2.58798	2.28848e-24	2.74135	0.00176139	2.6667	0.000880695
ENSG00000010932	FMO1	protein_coding	3602	NA	NA	-3.54752	NA	0	1	NA	NA	NA	NA	0	1	0.692498	NA	-1.26744	NA	0.0225279	1	NA	NA	NA	NA	0	1
ENSG00000011007	ELOA	protein_coding	5391	1.75736	3.07484e-08	0.243983	0.79548	1.19063	1	1.50014	0.00139938	0.481311	0.536976	1.07885	1	1.53098	2.06558e-06	0.302911	0.786603	1.04386	1	1.64023	1.36005e-10	1.76005	0.0807905	1.70138	1
ENSG00000011009	LYPLA2	protein_coding	2196	-0.561001	0.493488	-1.47182	0.253928	-0.945694	1	-0.861107	0.515293	-0.157556	NA	-0.466863	1	-1.17694	0.173658	-0.436897	NA	-0.759978	1	-0.791674	0.286209	-0.998844	NA	-0.891543	1
ENSG00000011021	CLCN6	protein_coding	6938	-0.519622	0.346667	-0.0344243	0.980804	-0.256721	1	-0.566848	0.249329	-0.381179	0.714865	-0.471029	1	-0.298453	0.578734	0.209303	0.897456	-0.0223511	1	-0.650863	0.102645	-0.430216	0.775837	-0.536325	1
ENSG00000011028	MRC2	protein_coding	6860	1.17449	0.000387999	0.958497	0.203109	1.07053	1	1.56205	8.2667e-06	0.68029	0.222036	1.18751	1	0.338135	0.728076	2.06325	NA	1.4445	1	0.675983	0.245237	0.319562	0.850033	0.508751	1
ENSG00000011052	NME1-NME2	protein_coding	1241	NA	NA	NA	NA	0	1	NA	NA	NA	NA	0	1	NA	NA	NA	NA	0	1	NA	NA	NA	NA	0	1
ENSG00000011083	SLC6A7	protein_coding	4391	2.30538	NA	-2.22352	NA	1.36656	1	1.57466	0.660166	-2.83475	NA	0.641002	1	2.64851	0.367911	-1.20528	NA	1.745	1	1.04281	NA	-3.952	NA	0.0873608	1
ENSG00000011105	TSPAN9	protein_coding	6905	-0.991397	0.258479	0.239905	NA	-0.248189	1	-0.558883	0.647796	-1.5161	0.261681	-0.959518	1	-0.260386	0.780231	3.49096	NA	2.5943	1	-0.187669	0.867942	0.0932698	NA	-0.040372	1
ENSG00000011114	BTBD7	protein_coding	11333	0.847323	0.012762	1.03957	0.117187	0.946649	1	0.552894	0.225072	2.06909	0.004431	1.50163	1	1.03854	0.000530242	1.34837	0.0972702	1.20176	1	1.28468	3.13278e-07	1.31197	0.1453	1.29839	1
ENSG00000011132	APBA3	protein_coding	5556	0.270131	0.875149	-0.916329	NA	-0.204421	1	1.09545	0.469034	0.711045	NA	0.916011	1	0.321977	0.841249	0.27289	NA	0.297642	1	1.10091	0.304496	3.444	NA	2.70353	1
ENSG00000011143	MKS1	protein_coding	4078	0.487324	0.501009	0.835976	0.60653	0.672156	1	1.13759	0.207047	-0.0828482	0.956674	0.65275	1	-0.0586919	0.960976	-0.376813	NA	-0.209002	1	0.289428	0.669708	1.55237	NA	1.0549	1
ENSG00000011198	ABHD5	protein_coding	3172	0.602641	0.501358	2.29014	NA	1.68022	1	1.05054	0.333001	2.82178	0.213656	2.19245	1	0.900392	0.363446	0.35372	NA	0.652796	1	1.08203	0.101297	0.567833	NA	0.847718	1
ENSG00000011201	ANOS1	protein_coding	7131	-1.1415	0.0167306	-0.543805	0.684078	-0.811921	1	-1.28281	0.389089	-0.0467146	NA	-0.53624	1	-0.91602	0.434255	-0.278518	NA	-0.562339	1	-0.194787	0.937374	-1.69784	NA	-0.758831	1
ENSG00000011243	AKAP8L	protein_coding	5081	1.93346	6.96924e-09	0.16686	0.838495	1.30518	1	1.69343	4.1433e-05	1.43487	0.0633434	1.56994	1	1.03856	0.00821757	-0.620548	0.497116	0.435417	1	1.37774	0.000113546	0.273235	0.842546	0.928705	1
ENSG00000011258	MBTD1	protein_coding	7201	-0.389035	0.314938	0.161458	0.861175	-0.0876893	1	-0.593028	0.159763	-0.472466	0.529685	-0.531488	1	-0.0327463	0.947011	-0.0111685	0.993074	-0.0219171	1	-0.0932828	0.777169	0.0738634	0.95224	-0.00729041	1
ENSG00000011260	UTP18	protein_coding	2721	1.92044	0.000254117	1.88943	0.0826068	1.90502	1	1.70836	0.00741811	0.647837	0.511572	1.27343	1	1.25538	0.0759063	1.40436	NA	1.3318	1	1.73472	0.00111703	1.44205	0.384981	1.5958	1
ENSG00000011275	RNF216	protein_coding	7619	2.08824	6.73806e-12	1.98363	0.00231805	2.03688	0.00115902	1.87767	9.45536e-07	1.9511	0.000830107	1.91485	0.000415526	2.1567	4.37465e-11	1.00632	0.24041	1.69326	1	2.63341	1.32155e-22	2.2384	0.0116545	2.44938	0.00582727
ENSG00000011295	TTC19	protein_coding	5966	-0.737859	0.128081	0.54646	0.719935	0.042733	1	-0.308109	0.686935	-0.138258	0.93123	-0.220685	1	-1.19314	0.0432358	-0.606526	NA	-0.87022	1	-0.688875	0.160412	0.0445639	0.983647	-0.276041	1
ENSG00000011304	PTBP1	protein_coding	6883	0.48132	0.118959	0.640506	0.330359	0.563108	1	0.998703	0.00584896	0.239185	0.727709	0.668359	1	0.820379	0.0309371	1.61523	0.137337	1.27186	1	0.531344	0.149204	0.267204	0.849409	0.40531	1
ENSG00000011332	DPF1	protein_coding	4800	0.31669	0.677493	-0.384435	0.814638	0.00830655	1	0.283072	0.797547	1.40008	0.451898	0.947084	1	0.567425	0.198733	-0.658408	0.510383	0.0809671	1	0.502901	0.268419	-0.461942	0.726119	0.0996784	1
ENSG00000011347	SYT7	protein_coding	5953	0.754138	0.27333	1.45425	0.406188	1.14625	1	0.633188	0.577929	-0.0491438	0.981697	0.331991	1	0.551159	0.195594	0.678852	0.552851	0.616418	1	1.0325	0.0193938	0.122529	0.943057	0.648103	1
ENSG00000011376	LARS2	protein_coding	5393	1.98189	1.14349e-07	1.15107	0.185696	1.62548	1	2.55904	1.1832e-06	1.58101	0.0509924	2.15136	1	2.23049	6.08933e-05	1.47073	0.292514	1.90005	1	2.45594	1.24356e-09	1.37981	0.268293	2.01597	1
ENSG00000011405	PIK3C2A	protein_coding	9204	1.17109	4.62996e-06	1.74131	2.02075e-05	1.48419	1.24187e-05	0.881785	0.00881684	1.24767	0.00117327	1.0763	0.00499505	1.34242	2.36402e-07	1.60288	0.0423173	1.47852	0.0211588	1.33428	1.20285e-11	1.39841	0.0573495	1.3667	1
ENSG00000011422	PLAUR	protein_coding	4457	-0.823198	NA	-1.42144	NA	-1.09153	1	0.220665	0.948856	0.0189273	NA	0.123319	1	-0.0809364	NA	-0.677087	NA	-0.348436	1	-0.828142	0.767539	-0.972373	NA	-0.898456	1
ENSG00000011426	ANLN	protein_coding	6012	0.912153	0.0109013	1.38095	0.0505045	1.16551	1	1.85637	0.000217894	1.25458	0.098944	1.58663	1	1.77982	0.00600745	2.13317	NA	1.96728	1	1.36668	0.00241874	3.01372	0.0578272	2.41348	1
ENSG00000011451	WIZ	protein_coding	7965	1.64839	3.55338e-08	0.894493	0.302502	1.32014	1	2.15947	1.15201e-07	1.67552	0.00225276	1.9377	0.00112644	1.94777	7.93274e-12	0.703299	0.410712	1.45576	1	2.28864	4.37558e-22	1.74059	0.0399267	2.04048	0.0199633
ENSG00000011454	RABGAP1	protein_coding	9162	1.2474	4.28359e-08	1.2602	0.00673696	1.25382	0.0033685	1.51848	4.43563e-08	1.29913	0.000491481	1.41297	0.000245763	1.64259	6.41856e-13	0.986284	0.173121	1.35144	1	2.00496	2.03758e-21	0.622538	0.45705	1.47336	1
ENSG00000011465	DCN	protein_coding	12847	0.839326	NA	-2.3181	NA	-0.00741661	1	-1.3286	NA	NA	NA	0	1	-1.0926	NA	-3.08032	NA	-1.76821	1	-0.229793	NA	-1.70133	NA	-0.785553	1
ENSG00000011478	QPCTL	protein_coding	2396	-1.45906	0.333252	-1.07336	NA	-1.25336	1	0.648851	0.743721	0.309207	NA	0.489001	1	-1.13059	0.537073	-0.747514	NA	-0.926373	1	-1.49408	0.375922	-1.2905	NA	-1.3887	1
ENSG00000011485	PPP5C	protein_coding	7059	1.67906	3.77773e-06	0.848841	0.373065	1.32287	1	2.49669	5.02911e-07	1.63169	0.0259929	2.12807	0.0129967	1.48963	0.000520508	0.680842	0.592272	1.14119	1	1.98271	4.48505e-07	1.38107	0.311556	1.71303	1
ENSG00000011523	CEP68	protein_coding	8623	0.369872	0.353133	1.28983	0.160854	0.901971	1	0.60718	0.277603	0.67702	0.4842	0.642523	1	0.0532009	0.927198	0.86315	0.498322	0.514284	1	0.398307	0.248455	1.24059	0.248837	0.880061	1
ENSG00000011566	MAP4K3	protein_coding	6067	0.0708182	0.882804	-0.144061	0.881679	-0.0326246	1	0.0481263	0.946109	0.47556	0.609079	0.277615	1	0.728696	0.0420644	0.277661	0.8115	0.520733	1	0.388763	0.234848	0.462456	0.684254	0.42608	1
ENSG00000011590	ZBTB32	protein_coding	2770	NA	NA	NA	NA	0	1	0.309205	NA	-1.4401	NA	-0.315121	1	-0.287473	NA	NA	NA	0	1	NA	NA	NA	NA	0	1
ENSG00000011600	TYROBP	protein_coding	907	NA	NA	NA	NA	0	1	-1.3286	NA	NA	NA	0	1	NA	NA	NA	NA	0	1	0.9398	NA	-1.81579	NA	0.139019	1
ENSG00000011638	TMEM159	protein_coding	2558	-1.06228	0.142869	-1.68236	0.200376	-1.33926	1	-0.441449	0.720527	-0.400685	0.852344	-0.420923	1	-1.15387	0.552415	-2.28235	NA	-1.61047	1	-0.786742	0.442083	0.366816	NA	-0.0976133	1
ENSG00000011677	GABRA3	protein_coding	4193	-0.252377	0.852992	-1.67197	NA	-0.794186	1	-0.388121	0.839859	-1.23849	NA	-0.751538	1	-0.898951	0.136277	0.656749	NA	0.0791579	1	-0.71646	0.183641	-1.24559	0.335072	-0.9569	1
ENSG00000012048	BRCA1	protein_coding	8922	1.47049	2.52014e-06	1.3866	0.0198778	1.42915	0.00994015	0.983649	0.0490418	0.738303	0.381936	0.866185	1	1.82721	0.00117713	1.44816	0.333829	1.6501	1	1.32032	0.0165244	1.47507	0.414239	1.39977	1
ENSG00000012061	ERCC1	protein_coding	5576	-0.456316	0.473312	-1.2184	0.230445	-0.787612	1	0.152194	0.876967	-1.0317	0.271564	-0.321575	1	-0.986296	0.177414	-1.25532	NA	-1.11455	1	-0.479414	0.382225	0.0755597	0.972478	-0.175404	1
ENSG00000012124	CD22	protein_coding	6159	-0.999462	NA	-1.47167	NA	-1.21633	1	-1.3286	NA	NA	NA	0	1	-2.44436	NA	NA	NA	0	1	-1.30053	NA	-1.70133	NA	-1.48705	1
ENSG00000012171	SEMA3B	protein_coding	5768	-0.127952	0.95646	-1.73283	NA	-0.717867	1	0.126166	NA	-3.16512	NA	-0.733518	1	0.756516	0.721134	-0.834341	NA	0.170082	1	0.0776947	0.963961	-1.03798	NA	-0.37488	1
ENSG00000012174	MBTPS2	protein_coding	8927	-2.0473	3.88829e-05	-0.741427	0.673938	-1.25139	1	-1.81446	0.005519	-1.69406	0.104926	-1.753	1	-1.38446	0.0181017	0.124614	NA	-0.441	1	-1.90481	8.9069e-05	-0.918418	NA	-1.3289	1
ENSG00000012211	PRICKLE3	protein_coding	3194	-0.367282	0.916982	-2.45668	NA	-1.0628	1	0.649096	0.810786	0.0546745	NA	0.382285	1	0.530977	NA	-1.28656	NA	-0.10871	1	-0.0622557	NA	-0.41302	NA	-0.227004	1
ENSG00000012223	LTF	protein_coding	4247	0.488631	NA	-2.29385	NA	-0.315592	1	0.474498	NA	-3.22189	NA	-0.418297	1	1.45133	NA	-1.26744	NA	0.655353	1	-0.741642	NA	-5.12287	NA	-1.67402	1
ENSG00000012232	EXTL3	protein_coding	13220	2.3439	1.28065e-19	2.13104	8.3304e-06	2.24139	4.1652e-06	2.81161	4.04047e-16	2.26572	4.10154e-09	2.56433	2.05077e-09	3.00173	7.00719e-31	2.12238	0.0022799	2.62804	0.00113995	3.1835	1.10271e-33	2.62887	0.000180755	2.93267	9.03773e-05
ENSG00000012504	NR1H4	protein_coding	3460	1.75126	NA	-1.37783	NA	0.907397	1	-1.34429	NA	NA	NA	0	1	NA	NA	NA	NA	0	1	NA	NA	NA	NA	0	1
ENSG00000012660	ELOVL5	protein_coding	3813	-1.81491	1.30046e-07	0.0464913	0.975509	-0.602776	1	-1.78875	4.80733e-07	-0.930697	0.194519	-1.29685	1	-1.62944	1.21567e-05	-0.356299	0.811925	-0.856765	1	-1.95761	1.18889e-11	-1.30519	0.201664	-1.59483	1
ENSG00000012779	ALOX5	protein_coding	3730	1.13555	NA	-2.57518	NA	0.241733	1	0.641485	NA	-2.36389	NA	-0.189186	1	2.05758	NA	-0.677087	NA	1.25952	1	2.3126	NA	-0.446075	NA	1.51142	1
ENSG00000012817	KDM5D	protein_coding	9463	1.47778	1.38777e-06	1.31025	0.0742298	1.39645	1	1.74157	3.1402e-06	1.25318	0.0537116	1.51795	1	0.844436	0.0595167	0.0706701	0.958098	0.508818	1	1.34058	5.27623e-05	0.93391	0.481169	1.15153	1
ENSG00000012822	CALCOCO1	protein_coding	8898	-0.156142	0.81412	0.0988274	0.948549	-0.023032	1	-0.430765	0.611019	-0.328315	0.805766	-0.378631	1	-0.917028	0.00759648	-1.21206	0.122063	-1.05701	1	-0.693418	0.0154518	-0.908869	0.380306	-0.797125	1
ENSG00000012963	UBR7	protein_coding	3694	0.340015	0.557245	1.22736	0.361664	0.850861	1	0.899668	0.275408	0.852159	0.547798	0.876109	1	0.906139	0.241362	2.00255	NA	1.55609	1	1.20525	0.0361361	0.711301	0.709282	0.979311	1
ENSG00000012983	MAP4K5	protein_coding	7620	-0.605018	0.0872413	0.088079	0.936026	-0.217242	1	-0.587656	0.216093	-0.166327	0.88723	-0.361665	1	-0.233912	0.533919	0.280656	0.809097	0.0461929	1	-0.430873	0.162485	0.272416	0.821155	-0.0367907	1
ENSG00000013016	EHD3	protein_coding	4636	0.141515	0.890378	2.36782	NA	1.64724	1	0.948449	0.297507	1.92265	0.275352	1.51626	1	0.217709	0.855066	0.145701	NA	0.182154	1	0.92691	0.220426	2.88362	NA	2.21431	1
ENSG00000013275	PSMC4	protein_coding	2387	1.07079	0.0724639	1.2369	0.403561	1.15623	1	1.63672	0.0167722	0.101051	0.940603	1.06424	1	1.03455	0.0790885	-0.594049	0.665816	0.438799	1	1.42717	0.00772977	0.143455	0.941701	0.923622	1
ENSG00000013288	MAN2B2	protein_coding	8898	0.640297	0.464811	0.448105	NA	0.547399	1	2.06134	0.0234235	2.1964	0.164113	2.13045	1	1.04683	0.363282	-0.0108057	NA	0.612834	1	1.07282	0.131328	0.487331	NA	0.809576	1
ENSG00000013293	SLC7A14	protein_coding	10459	0.333742	0.905128	-0.970588	NA	-0.175781	1	1.49394	NA	0.864143	NA	1.21314	1	-0.956412	0.282807	1.01275	NA	0.340897	1	-0.603794	0.656219	0.905747	NA	0.340013	1
ENSG00000013297	CLDN11	protein_coding	6032	-3.1756	0.0122436	-1.74383	NA	-2.28894	1	-0.985446	0.561047	-1.28753	0.539862	-1.12859	1	-3.10799	NA	-3.80381	NA	-3.41435	1	-2.41704	0.319035	-0.952277	NA	-1.50624	1
ENSG00000013306	SLC25A39	protein_coding	3526	0.512076	0.44016	-0.222555	0.884811	0.191024	1	1.08778	0.212981	0.786227	0.588444	0.944869	1	-0.0571264	0.961443	-0.117878	NA	-0.0871824	1	1.28426	0.0936394	-0.730578	0.64273	0.603236	1
ENSG00000013364	MVP	protein_coding	6141	0.738587	0.724437	0.420948	NA	0.588492	1	2.40026	0.0933552	0.000883729	0.999477	1.65068	1	1.90861	0.513763	1.33149	NA	1.64871	1	1.25084	0.297105	0.271449	NA	0.842702	1
ENSG00000013374	NUB1	protein_coding	5411	1.16752	0.00590259	1.27135	0.251403	1.22037	1	1.76717	0.0111458	1.37547	0.201073	1.58457	1	1.20882	0.0174405	-0.167595	0.913922	0.678885	1	1.46693	0.000164765	1.46868	0.302567	1.4678	1
ENSG00000013375	PGM3	protein_coding	7335	-0.378858	0.442388	0.470566	0.722321	0.107486	1	-0.544913	0.29692	-0.256129	0.79942	-0.393307	1	-0.432442	0.527149	0.536634	NA	0.131978	1	-0.808911	0.0712901	-0.481564	0.761093	-0.635973	1
ENSG00000013392	RWDD2A	protein_coding	3744	0.0980874	0.946848	-0.295835	NA	-0.0854704	1	-1.08052	0.611398	-0.161892	NA	-0.549291	1	-0.550422	0.74083	-0.0160487	NA	-0.258634	1	-0.918977	0.411681	0.770983	NA	0.160479	1
ENSG00000013441	CLK1	protein_coding	5170	-1.09728	0.0211342	-0.960457	0.392008	-1.02725	1	-0.456047	0.479247	-0.819637	0.366474	-0.626418	1	-0.879727	0.0291005	-2.28173	0.000446275	-1.41673	1	-1.09994	0.00405147	-1.9193	0.0167031	-1.45222	1
ENSG00000013503	POLR3B	protein_coding	4858	2.70297	6.43174e-10	2.20275	0.0336218	2.47444	0.0168109	2.27351	0.000351265	1.72955	0.119269	2.02702	1	2.65573	7.63388e-07	0.0919852	0.953386	1.88117	1	3.41367	9.8246e-12	2.6914	0.0504298	3.09727	1
ENSG00000013523	ANGEL1	protein_coding	6414	-0.147329	0.79463	0.316881	0.806232	0.103367	1	0.582092	0.377406	-0.234323	0.818104	0.230881	1	-0.715066	0.345083	-0.194636	NA	-0.43151	1	-0.0705806	0.92397	-0.0178821	0.992246	-0.0439907	1
ENSG00000013561	RNF14	protein_coding	4987	-0.182357	0.771134	-0.902248	0.354912	-0.497858	1	0.590921	0.444293	0.348653	0.780117	0.474867	1	0.425032	0.469253	0.996299	0.530423	0.738759	1	0.574021	0.238774	1.19511	0.413944	0.917735	1
ENSG00000013563	DNASE1L1	protein_coding	4130	-1.07454	0.514145	-0.311726	NA	-0.643295	1	-0.283344	0.909748	-1.37894	NA	-0.729549	1	-0.828473	0.735304	-0.894219	NA	-0.860971	1	0.126159	0.939281	0.133058	NA	0.129613	1
ENSG00000013573	DDX11	protein_coding	8374	0.505513	0.514394	1.39972	NA	1.02082	1	0.63073	0.574531	2.57532	0.240973	1.9085	1	0.365045	0.844527	1.70408	NA	1.18464	1	0.482698	0.670652	1.21788	NA	0.89662	1
ENSG00000013583	HEBP1	protein_coding	3442	-0.688135	0.509623	0.357719	NA	-0.072442	1	0.447466	0.82586	-0.718086	NA	-0.0206721	1	-0.289415	0.907648	-0.508044	NA	-0.394592	1	-0.528049	0.677988	0.313626	NA	-0.0466833	1
ENSG00000013588	GPRC5A	protein_coding	8440	-0.287936	0.877745	-1.15828	NA	-0.658449	1	-1.69969	0.505975	-2.00732	NA	-1.84532	1	0.205922	NA	-2.48948	NA	-0.586955	1	0.176496	NA	-3.27726	NA	-0.697499	1
ENSG00000013619	MAMLD1	protein_coding	5958	1.31559	0.365749	0.469391	NA	0.953662	1	2.42112	0.413909	0.95449	NA	1.86666	1	0.798678	0.570759	3.06589	NA	2.33819	1	0.717073	0.570756	-0.515282	NA	0.228665	1
ENSG00000013725	CD6	protein_coding	5958	-0.0262819	NA	NA	NA	0	1	0.685913	NA	-0.919396	NA	0.0958908	1	NA	NA	-3.08032	NA	0	1	0.0475709	NA	-2.65175	NA	-0.745829	1
ENSG00000013810	TACC3	protein_coding	6528	1.7989	4.4841e-07	0.136237	0.895995	1.1949	1	2.37035	1.67407e-05	3.23945	0.00198958	2.86938	0.00100316	1.53712	0.0626786	0.404075	0.875057	1.07909	1	1.64717	0.00723233	3.18614	NA	2.61282	1
ENSG00000014123	UFL1	protein_coding	4539	0.41618	0.30582	0.97794	0.289948	0.724232	1	0.680561	0.164418	1.20181	0.0792775	0.964602	1	-0.0526052	0.948633	3.08927	NA	2.2441	1	0.106547	0.82249	0.526413	0.729458	0.331701	1
ENSG00000014138	POLA2	protein_coding	5726	-0.0967184	0.892013	0.612332	0.691687	0.300935	1	0.990043	0.211465	0.818564	0.523616	0.90685	1	0.32401	0.8361	2.15299	NA	1.51078	1	0.591375	0.516071	1.06019	NA	0.844744	1
ENSG00000014164	ZC3H3	protein_coding	3731	2.5595	2.50241e-08	1.78975	0.0718411	2.22536	1	3.00846	9.60266e-08	1.38849	0.147229	2.41482	1	2.93972	6.5056e-09	1.5159	0.199157	2.39676	1	2.80235	8.42381e-12	4.13064	0.00924797	3.61425	0.00462399
ENSG00000014216	CAPN1	protein_coding	7553	2.62526	2.86426e-13	1.77405	0.0275869	2.26154	0.0137934	2.67071	3.84058e-06	0.763216	0.451187	2.01162	1	1.42265	0.000123473	1.16882	0.199381	1.30131	1	2.28982	4.06231e-15	1.35931	0.157318	1.89832	1
ENSG00000014257	ACPP	protein_coding	4193	4.08594	NA	-2.72791	NA	3.0987	1	0.651708	NA	-4.18126	NA	-0.298542	1	2.18716	NA	-1.56702	NA	1.2903	1	1.04281	NA	-4.20547	NA	0.0802748	1
ENSG00000014641	MDH1	protein_coding	4990	0.401183	0.407952	0.94222	0.390935	0.696917	1	1.01295	0.0848742	-0.263599	0.795739	0.511491	1	0.961005	0.106251	0.146266	0.935405	0.610401	1	1.00832	0.0368789	0.116933	0.949402	0.630402	1
ENSG00000014824	SLC30A9	protein_coding	7225	-0.0296128	0.958768	0.946696	0.264182	0.539599	1	-0.192338	0.713528	0.655077	0.395105	0.292715	1	-0.0366902	0.94139	1.91767	0.0955791	1.24884	1	0.225126	0.48578	0.942992	0.334982	0.628256	1
ENSG00000014914	MTMR11	protein_coding	4562	-0.787655	0.686373	-0.921537	NA	-0.853044	1	0.0423696	0.988033	1.25664	NA	0.773656	1	-1.86586	0.412573	-2.14546	NA	-1.9989	1	-1.52836	0.387058	0.251941	NA	-0.379432	1
ENSG00000014919	COX15	protein_coding	4177	-1.03783	0.024792	-0.677554	0.585595	-0.846473	1	-0.7219	0.34277	-0.496963	0.714254	-0.605052	1	-1.01512	0.12504	-0.731628	0.72405	-0.866423	1	-1.68767	0.000483673	-1.08533	0.532999	-1.35529	1
ENSG00000015133	CCDC88C	protein_coding	12426	2.89307	6.19914e-28	2.21862	9.02392e-06	2.5949	4.51196e-06	3.30168	2.26969e-08	1.69859	0.00496938	2.71221	0.0024847	3.25588	3.58288e-27	2.55441	0.00255974	2.94736	0.00127987	3.31172	1.37506e-32	1.79371	0.028528	2.74379	0.014264
ENSG00000015153	YAF2	protein_coding	10839	-2.64752	3.96325e-07	-2.31515	0.0274847	-2.47179	1	-3.33936	1.3241e-08	-2.01043	0.167559	-2.527	1	-3.51089	1.5505e-12	0.978115	NA	0.0409717	1	-3.04886	5.0764e-16	-1.18947	0.481061	-1.8383	1
ENSG00000015171	ZMYND11	protein_coding	5300	0.556104	0.151743	0.237449	0.79654	0.405557	1	0.141119	0.827295	1.01429	0.273062	0.64278	1	0.224102	0.574965	0.481104	0.66542	0.358318	1	0.547361	0.0353924	1.7293	0.126115	1.25613	1
ENSG00000015285	WAS	protein_coding	2381	0.831915	NA	-2.3181	NA	-0.0140786	1	-0.505204	NA	-3.59882	NA	-1.34539	1	-0.599933	NA	-1.26744	NA	-0.895421	1	0.516414	NA	-1.4327	NA	-0.151336	1
ENSG00000015413	DPEP1	protein_coding	2737	2.10629	NA	-0.653707	NA	1.30494	1	-0.562226	NA	-1.53969	NA	-0.969713	1	2.19935	NA	0.394685	NA	1.56251	1	0.647119	NA	-0.932851	NA	0.0634059	1
ENSG00000015475	BID	protein_coding	4446	-0.713365	0.730189	-0.908332	NA	-0.807557	1	-1.69098	0.375925	0.426282	NA	-0.274493	1	-0.573789	0.763564	1.12031	NA	0.508824	1	0.309104	0.833032	0.0956606	NA	0.206326	1
ENSG00000015479	MATR3	protein_coding	12090	0.0407687	0.971557	-0.843695	0.596504	-0.33472	1	-0.0694022	0.970226	0.270006	NA	0.11026	1	0.0666192	0.964249	1.27883	NA	0.796463	1	0.712936	0.382686	2.58179	NA	1.93091	1
ENSG00000015520	NPC1L1	protein_coding	5252	2.48488	NA	-1.47292	NA	1.57486	1	0.624794	NA	-1.68196	NA	-0.109631	1	1.02905	NA	-0.918668	NA	0.361585	1	0.150624	NA	-3.53685	NA	-0.741531	1
ENSG00000015532	XYLT2	protein_coding	5472	0.6763	0.378947	0.513415	0.77954	0.597155	1	1.67715	0.0678383	1.15799	0.48421	1.4408	1	0.773727	0.54814	0.845122	NA	0.809866	1	0.606425	0.475626	0.729359	NA	0.669201	1
ENSG00000015568	RGPD5	protein_coding	14175	NA	NA	NA	NA	0	1	NA	NA	NA	NA	0	1	NA	NA	NA	NA	0	1	NA	NA	NA	NA	0	1
ENSG00000015592	STMN4	protein_coding	3294	0.242661	0.797306	-0.20619	0.907837	0.0356216	1	-0.948283	0.402517	-0.238818	NA	-0.550372	1	-1.03714	0.00185328	-1.24871	0.12766	-1.13905	1	-0.983781	0.00183082	-1.14124	0.278397	-1.06036	1
ENSG00000015676	NUDCD3	protein_coding	10113	0.364197	0.459292	0.565442	0.622421	0.468326	1	1.01226	0.107288	0.0545238	0.964862	0.611451	1	0.978896	0.0162604	1.01368	0.361856	0.99639	1	0.827123	0.0319574	0.735512	0.551339	0.782045	1
ENSG00000016082	ISL1	protein_coding	2882	1.19415	NA	-2.30034	NA	0.316792	1	0.846809	NA	-0.639451	NA	0.287163	1	-0.074435	0.952122	-1.80195	0.196474	-0.693738	1	0.66404	0.310528	-0.814596	0.572355	0.106403	1
ENSG00000016391	CHDH	protein_coding	7758	-0.680242	0.657025	-1.17024	NA	-0.904535	1	-0.0765772	0.975799	0.57269	NA	0.284277	1	1.22645	0.606318	-1.85139	NA	0.387934	1	2.61577	0.246167	1.70071	NA	2.2296	1
ENSG00000016402	IL20RA	protein_coding	4730	-0.0875248	NA	NA	NA	0	1	1.58569	NA	-1.15981	NA	0.78621	1	-1.85086	NA	NA	NA	0	1	-0.778303	NA	-4.30837	NA	-1.65853	1
ENSG00000016490	CLCA1	protein_coding	3340	1.70612	NA	-1.40845	NA	0.863755	1	NA	NA	NA	NA	0	1	0.692498	NA	-2.06228	NA	-0.10818	1	-1.54902	NA	-3.60387	NA	-2.2379	1
ENSG00000016602	CLCA4	protein_coding	3447	1.68758	NA	-1.47167	NA	0.840658	1	0.474498	NA	-1.53274	NA	-0.205018	1	1.48924	NA	-1.3335	NA	0.679969	1	-0.84818	NA	NA	NA	0	1
ENSG00000016864	GLT8D1	protein_coding	3783	-0.209775	0.760347	-0.84984	0.446802	-0.494599	1	-0.439544	0.630219	-0.320117	0.852344	-0.378595	1	-0.0756823	0.938938	-0.396653	NA	-0.22726	1	-0.316397	0.655537	-0.627571	0.764522	-0.463611	1
ENSG00000017260	ATP2C1	protein_coding	8533	0.782178	0.00385267	1.39979	0.00607621	1.12378	0.00496444	0.732501	0.059678	0.6313	0.313591	0.682788	1	0.298204	0.42637	0.00814765	0.994325	0.160453	1	0.658591	0.0164083	0.400684	0.686517	0.535393	1
ENSG00000017427	IGF1	protein_coding	8087	NA	NA	NA	NA	0	1	-1.3286	NA	-3.32248	NA	-2.00545	1	NA	NA	NA	NA	0	1	-0.826966	NA	-3.53685	NA	-1.62177	1
ENSG00000017483	SLC38A5	protein_coding	4014	0.481259	NA	-2.99541	NA	-0.394639	1	0.0866707	NA	-1.86886	NA	-0.582397	1	0.177639	NA	-0.366127	NA	-0.068775	1	-0.678263	NA	-3.58862	NA	-1.4981	1
ENSG00000017797	RALBP1	protein_coding	8043	1.766	1.24617e-07	0.662254	0.315243	1.3172	1	2.06231	1.17835e-08	2.31963	8.39592e-05	2.1967	4.19855e-05	2.03551	1.37475e-08	0.946721	0.368031	1.59148	1	2.48674	6.96431e-19	0.701438	0.479658	1.85424	1
ENSG00000018189	RUFY3	protein_coding	8070	0.101804	0.787538	0.32528	0.595635	0.217864	1	-0.421202	0.277225	0.0248234	0.974734	-0.181021	1	-0.46079	0.0344052	0.501154	0.439231	0.0989135	1	-0.424339	0.0295562	0.219362	0.811166	-0.0668817	1
ENSG00000018236	CNTN1	protein_coding	7492	-0.0733922	0.950339	2.03321	NA	1.33444	1	0.560477	0.668173	0.201278	0.930495	0.392028	1	-0.859798	0.0321454	0.500837	0.736357	-0.0246898	1	-0.629551	0.325438	-0.367547	0.854743	-0.492609	1
ENSG00000018280	SLC11A1	protein_coding	8676	-1.62449	NA	-4.02864	NA	-2.37484	1	-0.691709	NA	-2.38654	NA	-1.30336	1	-1.49505	NA	NA	NA	0	1	-1.54902	NA	NA	NA	0	1
ENSG00000018408	WWTR1	protein_coding	8413	-0.428556	0.661111	2.22995	NA	1.44206	1	0.0254971	0.987717	-0.220771	0.91399	-0.0923883	1	0.773358	0.463299	4.08467	NA	3.22314	1	0.181362	0.821367	0.840637	NA	0.548336	1
ENSG00000018510	AGPS	protein_coding	8745	-0.619482	0.0807606	0.866923	0.331423	0.307238	1	-0.246824	0.642813	0.828186	0.355308	0.388576	1	-0.667837	0.081555	1.08754	0.39804	0.461822	1	-0.287242	0.346998	2.21298	0.0432816	1.44779	1
ENSG00000018607	ZNF806	unprocessed_pseudogene	1774	-0.0262819	NA	NA	NA	0	1	-2.47237	NA	-4.93573	NA	-3.23196	1	-0.287473	NA	NA	NA	0	1	-3.60221	NA	-3.49112	NA	-3.5456	1
ENSG00000018610	CXorf56	protein_coding	2580	-2.75041	0.01222	-1.3611	NA	-1.8946	1	-0.443841	0.80705	1.67106	NA	0.970732	1	-1.46158	0.206675	0.851439	NA	0.115962	1	-1.24283	0.209404	-0.520659	NA	-0.837021	1
ENSG00000018625	ATP1A2	protein_coding	6298	-0.381178	0.682359	0.617824	NA	0.203119	1	-0.332804	0.84027	-1.67087	0.298313	-0.851968	1	-0.872875	0.57281	1.46394	NA	0.724501	1	0.490973	0.856616	-0.8773	NA	-0.0366902	1
ENSG00000018699	TTC27	protein_coding	3185	1.55316	0.00236977	1.30277	0.302811	1.43339	1	2.19693	0.000932667	2.11631	0.0919222	2.15718	1	0.727633	0.540958	1.49401	NA	1.16112	1	1.08359	0.127032	1.96524	NA	1.59074	1
ENSG00000018869	ZNF582	protein_coding	3350	-0.657446	0.584423	0.493757	NA	0.0300582	1	-0.643917	0.732571	-1.35247	0.558719	-0.955124	1	-0.397443	0.803369	0.439455	NA	0.0808589	1	-1.15319	0.228855	-0.51502	NA	-0.799104	1
ENSG00000019102	VSIG2	protein_coding	1432	-0.0262819	NA	NA	NA	0	1	NA	NA	-3.21968	NA	0	1	0.530977	NA	-1.28656	NA	-0.10871	1	0.9398	NA	-1.81579	NA	0.139019	1
ENSG00000019144	PHLDB1	protein_coding	21722	2.30295	1.07486e-13	1.20123	0.0424261	1.8548	0.0212131	2.75392	2.59671e-11	0.988598	0.0776795	2.12594	1	2.08557	1.02876e-14	0.381364	0.635856	1.4717	1	2.17903	1.61014e-23	1.77319	0.0323027	1.99033	0.0161513
ENSG00000019169	MARCO	protein_coding	2079	1.68758	NA	-1.47167	NA	0.840658	1	0.309205	NA	-2.70598	NA	-0.52255	1	0.586678	NA	-1.3335	NA	-0.0750724	1	NA	NA	-3.49112	NA	0	1
ENSG00000019186	CYP24A1	protein_coding	3972	1.20847	NA	-2.97707	NA	0.285651	1	3.63197	NA	-2.38413	NA	2.65409	1	1.43698	NA	-3.59363	NA	0.480456	1	0.860136	NA	-4.14207	NA	-0.0955365	1
ENSG00000019485	PRDM11	protein_coding	13940	0.714256	0.211457	0.535428	0.69955	0.627611	1	0.826844	0.318671	1.27387	0.386211	1.0676	1	0.801299	0.147578	1.58478	0.304776	1.24559	1	1.05714	0.0179114	0.492713	0.751454	0.802353	1
ENSG00000019505	SYT13	protein_coding	5424	-0.567461	0.539034	-0.834655	NA	-0.694881	1	-0.186398	0.893851	1.61568	NA	0.979428	1	-0.907501	0.0289029	0.93616	0.527659	0.290741	1	-0.500066	0.206729	-0.600405	0.628033	-0.549363	1
ENSG00000019549	SNAI2	protein_coding	2204	-0.913675	0.778133	-1.0121	NA	-0.962047	1	-1.33747	NA	-1.51008	NA	-1.4212	1	-0.993797	NA	-1.28656	NA	-1.13277	1	-0.141272	0.96414	0.129947	NA	0.000701676	1
ENSG00000019582	CD74	protein_coding	3184	-1.80082	NA	-3.15827	NA	-2.32545	1	-1.10786	NA	-1.66968	NA	-1.3616	1	1.42629	NA	-2.05466	NA	0.550044	1	0.699104	NA	-0.289423	NA	0.287901	1
ENSG00000019991	HGF	protein_coding	8897	-0.0550405	NA	-1.47787	NA	-0.597731	1	0.538223	0.860904	-0.475413	NA	0.118655	1	-0.319659	NA	NA	NA	0	1	NA	NA	-3.54255	NA	0	1
ENSG00000019995	ZRANB1	protein_coding	5993	1.29453	4.93493e-06	1.53576	0.00533642	1.42018	0.00267068	0.855071	0.0288991	1.08001	0.0834925	0.971919	1	1.78422	1.20521e-13	2.57665	0.000103147	2.23417	5.15736e-05	1.777	2.06023e-16	2.7164	0.00166764	2.32185	0.000833822
ENSG00000020129	NCDN	protein_coding	4917	0.911174	0.054823	0.843288	0.462367	0.87763	1	0.945445	0.184883	0.371599	0.735695	0.686868	1	0.991285	0.0151943	0.808419	0.485325	0.902748	1	1.33781	5.30389e-05	-0.345983	0.782617	0.728769	1
ENSG00000020181	ADGRA2	protein_coding	7061	-0.17601	0.913056	-1.05904	NA	-0.550994	1	0.467035	0.799303	1.18659	NA	0.871213	1	1.06298	0.483405	1.80304	NA	1.47995	1	-0.197063	0.891596	1.29398	NA	0.733077	1
ENSG00000020219	CCT8L1P	processed_pseudogene	1674	-0.356606	NA	-2.32918	NA	-1.02915	1	0.474498	NA	-2.74458	NA	-0.378339	1	NA	NA	NA	NA	0	1	NA	NA	-3.60387	NA	0	1
ENSG00000020256	ZFP64	protein_coding	6997	1.22851	0.0251683	1.01285	0.462177	1.12471	1	1.41828	0.0783263	1.43456	0.356467	1.42644	1	1.87165	0.00674963	1.05172	NA	1.51916	1	1.47348	0.0137669	1.48714	0.424126	1.48032	1
ENSG00000020426	MNAT1	protein_coding	3865	-0.825194	0.281894	-1.45923	0.266913	-1.10766	1	-0.873334	0.381582	1.01383	0.679025	0.359042	1	-1.08821	0.191314	-3.03935	0.00342902	-1.75638	1	-1.22366	0.0647338	-1.37617	0.43127	-1.2979	1
ENSG00000020577	SAMD4A	protein_coding	12170	-0.0329841	0.96716	-0.520425	0.682457	-0.256215	1	-0.367855	0.730456	-0.783764	0.574663	-0.560873	1	0.495126	0.467992	0.803239	0.676176	0.657392	1	0.0582319	0.892577	0.773287	0.54185	0.459614	1
ENSG00000020633	RUNX3	protein_coding	4523	NA	NA	NA	NA	0	1	NA	NA	NA	NA	0	1	-0.319659	NA	NA	NA	0	1	1.04281	NA	-1.70133	NA	0.243509	1
ENSG00000020922	MRE11	protein_coding	7689	-1.07715	0.00338065	-0.335323	0.763469	-0.659071	1	-1.17353	0.0124486	0.402281	0.786061	-0.180389	1	-1.15754	0.0528343	-0.262046	NA	-0.6414	1	-1.11463	0.00823393	-0.223786	0.913253	-0.601512	1
ENSG00000021300	PLEKHB1	protein_coding	4933	-1.43288	0.435411	-2.42079	NA	-1.84387	1	-0.748595	0.729414	-1.28534	NA	-0.992147	1	0.522311	NA	-1.1846	NA	-0.0921855	1	1.85639	0.437172	1.36128	NA	1.62997	1
ENSG00000021355	SERPINB1	protein_coding	3094	-0.456558	NA	-2.38797	NA	-1.12065	1	-0.431858	NA	0.222653	NA	-0.0677994	1	NA	NA	NA	NA	0	1	-0.343111	NA	-0.902574	NA	-0.595891	1
ENSG00000021461	CYP3A43	protein_coding	2637	-1.75077	NA	-1.10719	NA	-1.39339	1	-2.68157	NA	NA	NA	0	1	-0.690091	NA	NA	NA	0	1	-3.17472	NA	NA	NA	0	1
ENSG00000021488	SLC7A9	protein_coding	2597	-0.872234	NA	NA	NA	0	1	-2.47237	NA	NA	NA	0	1	-1.67892	NA	NA	NA	0	1	-0.778303	NA	NA	NA	0	1
ENSG00000021574	SPAST	protein_coding	5213	0.995461	0.00235979	1.91676	0.00174269	1.52844	0.00205124	1.16229	0.00155599	1.62163	0.00481918	1.41017	0.00318759	0.841413	0.000444494	2.27169	0.00124723	1.72698	0.000845862	1.18119	1.7574e-07	2.1204	0.00266193	1.72591	0.00133105
ENSG00000021645	NRXN3	protein_coding	15535	0.0188574	0.975918	-0.521032	0.543169	-0.225978	1	0.485351	0.545886	-0.0389821	0.978154	0.246875	1	0.0626951	0.903553	-1.26948	0.114417	-0.454798	1	0.463719	0.120973	-0.539352	0.553653	0.0476587	1
ENSG00000021762	OSBPL5	protein_coding	7466	1.24499	0.0763722	0.882742	0.582093	1.07521	1	1.41886	0.143729	0.353388	0.848766	0.982328	1	0.445034	0.515415	-1.52782	0.117202	-0.227566	1	1.47597	0.000607138	-0.693007	0.590075	0.765651	1
ENSG00000021776	AQR	protein_coding	13528	1.95652	9.15957e-17	2.36961	3.40169e-07	2.1778	1.70085e-07	1.86606	2.0964e-09	2.44121	5.30613e-05	2.18211	2.65317e-05	1.84268	9.4527e-14	2.89796	0.000538264	2.46473	0.000269132	2.04128	1.4333e-22	2.07035	0.0157742	2.05589	0.0078871
ENSG00000021826	CPS1	protein_coding	10444	2.68338	2.85496e-25	2.59764	4.34446e-09	2.64115	2.17223e-09	2.96759	1.87411e-15	3.30466	3.74629e-16	3.14594	1.12437e-15	3.05266	1.29558e-10	6.50781	0.050438	5.6337	1	2.94368	2.19222e-17	2.94892	0.00555955	2.9463	0.00277977
ENSG00000021852	C8B	protein_coding	2729	1.70612	NA	-2.30766	NA	0.792776	1	-0.919226	NA	NA	NA	0	1	NA	NA	NA	NA	0	1	0.9398	NA	-1.81579	NA	0.139019	1
ENSG00000022267	FHL1	protein_coding	5997	-0.622927	0.192246	-0.463551	0.673025	-0.541039	1	0.0835474	0.9403	-0.59815	0.550279	-0.217406	1	-1.00691	0.0224356	-0.141792	0.935795	-0.510455	1	-0.510232	0.154889	-0.078	0.960153	-0.277989	1
ENSG00000022277	RTFDC1	protein_coding	4063	0.72311	0.247955	-0.136291	0.930986	0.356477	1	0.0131578	0.991887	-0.164122	0.92713	-0.0727607	1	1.0041	0.1494	0.357719	NA	0.71681	1	0.715088	0.273706	-0.446065	0.821078	0.248307	1
ENSG00000022355	GABRA1	protein_coding	6935	-0.740337	NA	-3.5588	NA	-1.54908	1	0.401504	0.919434	0.22007	NA	0.313637	1	-1.25876	0.427827	-0.107237	NA	-0.571036	1	-1.63847	0.0500061	-2.12337	NA	-1.86064	1
ENSG00000022556	NLRP2	protein_coding	6313	2.64156	8.75741e-08	2.2084	0.0658975	2.44117	1	2.80111	5.14418e-05	3.12201	0.00562259	2.97046	0.00283702	2.01146	0.0050964	1.17577	0.532809	1.6533	1	2.62531	1.32087e-08	1.59667	0.25255	2.20079	1
ENSG00000022567	SLC45A4	protein_coding	8608	0.612285	0.34132	0.00839007	0.99657	0.341708	1	0.574201	0.514158	0.300395	0.846091	0.443784	1	0.976986	0.138803	0.700763	NA	0.845475	1	0.66145	0.333399	0.541488	NA	0.602716	1
ENSG00000022840	RNF10	protein_coding	5911	1.6822	5.67888e-09	1.31987	0.0134905	1.51238	0.00674527	1.89615	3.21942e-07	1.67213	0.00157906	1.78849	0.000789691	1.58546	2.49381e-10	0.97739	0.179756	1.31323	1	1.90328	6.06577e-13	1.01992	0.19413	1.52818	1
ENSG00000022976	ZNF839	protein_coding	5590	1.38364	0.00811143	0.897971	0.495115	1.16115	1	2.14809	0.0140524	0.529234	0.731135	1.55472	1	1.55196	0.0397665	0.878534	NA	1.25419	1	2.07752	0.000735808	2.9115	NA	2.55395	1
ENSG00000023041	ZDHHC6	protein_coding	3748	-0.681696	0.275321	-1.58567	0.0793469	-1.06401	1	-1.46563	0.0532103	-1.89061	0.0829966	-1.66253	1	-0.839857	0.304734	-2.52904	0.0196184	-1.45018	1	-0.907966	0.117002	-0.729403	0.708	-0.815924	1
ENSG00000023171	GRAMD1B	protein_coding	14408	-0.0235054	0.972774	-0.374274	0.744649	-0.188256	1	-0.247837	0.810905	-0.622403	0.669937	-0.422998	1	-0.185264	0.809089	-0.785907	0.563208	-0.45455	1	0.0519201	0.941752	-0.802031	0.603235	-0.312774	1
ENSG00000023191	RNH1	protein_coding	7374	0.442145	0.59573	-0.322477	0.862042	0.109908	1	1.3369	0.135021	0.0491224	0.976158	0.832165	1	0.875603	0.275761	0.183246	NA	0.570565	1	0.959064	0.146549	0.768534	NA	0.866942	1
ENSG00000023228	NDUFS1	protein_coding	12268	0.577964	0.0449754	2.02671	0.000504251	1.47702	0.0227398	0.590313	0.115441	1.30872	0.0228106	0.99378	1	0.148442	0.699621	0.873818	0.256107	0.556247	1	0.415287	0.0747587	1.53357	0.0544958	1.08017	1
ENSG00000023287	RB1CC1	protein_coding	7615	2.01595	1.1088e-16	2.18263	5.08484e-08	2.1017	2.54242e-08	1.33946	3.25623e-05	1.76039	0.000102696	1.56522	6.7629e-05	2.34512	2.79323e-36	1.72474	0.000576526	2.06802	0.000288263	2.36741	3.26764e-41	2.30889	0.000379841	2.33845	0.00018992
ENSG00000023318	ERP44	protein_coding	4854	-1.25793	0.016391	-1.03216	0.41724	-1.14063	1	-1.31356	0.0122588	0.727875	0.632476	0.041611	1	-1.92251	1.18675e-05	0.79062	NA	-0.00461501	1	-1.83671	3.2412e-08	-0.118571	0.952155	-0.735692	1
ENSG00000023330	ALAS1	protein_coding	2536	1.93261	7.34052e-06	2.19449	0.0375025	2.06949	0.0187549	2.00757	0.00022655	1.0308	0.2477	1.60032	1	1.98897	0.000431124	1.22053	0.45216	1.65532	1	2.10804	8.08864e-07	1.84395	0.203641	1.98203	1
ENSG00000023445	BIRC3	protein_coding	7518	0.71578	NA	-1.61687	NA	-0.0229665	1	-2.19929	NA	-2.70598	NA	-2.4305	1	-1.26644	NA	-1.28656	NA	-1.27647	1	-0.463663	0.755734	-1.13781	NA	-0.761713	1
ENSG00000023516	AKAP11	protein_coding	9920	1.27984	4.25806e-08	1.94666	3.06043e-06	1.65144	1.55151e-06	1.14266	5.78267e-05	1.89774	5.07933e-08	1.56905	2.89388e-05	1.27358	2.01207e-10	2.44412	5.76527e-06	1.97444	2.88274e-06	1.48592	9.46061e-20	2.45714	5.20295e-05	2.05176	2.60148e-05
ENSG00000023572	GLRX2	protein_coding	1299	-2.63837	0.29124	-1.94987	NA	-2.25343	1	-2.03602	NA	-2.68072	NA	-2.32266	1	-0.674268	NA	-0.0492815	NA	-0.328193	1	-0.33365	0.878663	0.904526	NA	0.414382	1
ENSG00000023608	SNAPC1	protein_coding	2656	-0.691298	0.469585	-0.0743858	NA	-0.350115	1	-0.388419	0.784367	-1.7647	0.140677	-0.918315	1	-1.41725	0.25293	0.910417	NA	0.172496	1	-0.919108	0.276991	0.0803526	NA	-0.334505	1
ENSG00000023697	DERA	protein_coding	2844	-0.244228	0.779591	-0.699399	0.652604	-0.453937	1	0.104295	0.95573	0.600586	NA	0.373677	1	-0.294415	0.871514	0.766675	NA	0.33156	1	-0.0310679	0.981746	1.69107	NA	1.07301	1
ENSG00000023734	STRAP	protein_coding	2211	0.693659	0.0460991	0.555992	0.411524	0.626467	1	0.916062	0.0159812	1.02514	0.0628699	0.971633	1	0.781896	0.0285674	-0.0456621	0.971579	0.426659	1	0.998	0.000231029	0.396526	0.708622	0.728383	1
ENSG00000023839	ABCC2	protein_coding	6232	0.870824	0.758721	-1.26254	NA	0.167047	1	-0.347553	NA	-1.50165	NA	-0.812149	1	0.329545	0.901836	0.368944	NA	0.349379	1	0.255076	0.900943	-2.0736	NA	-0.483013	1
ENSG00000023892	DEF6	protein_coding	2545	-0.581294	NA	-2.64856	NA	-1.27257	1	0.619764	NA	-1.74556	NA	-0.124345	1	-2.80591	NA	-3.68139	NA	-3.17824	1	-3.08614	NA	-4.11755	NA	-3.51157	1
ENSG00000023902	PLEKHO1	protein_coding	6565	2.29205	1.77593e-06	1.50913	0.185887	1.95306	1	1.92395	0.00677488	2.32914	0.0827297	2.14072	1	1.34653	0.00421972	0.284458	0.846197	0.911098	1	1.82653	1.84535e-05	0.0809896	0.957588	1.20306	1
ENSG00000023909	GCLM	protein_coding	5420	-0.967993	0.357045	0.363886	NA	-0.153523	1	-1.22673	0.46729	1.5208	NA	0.721063	1	-0.733377	0.501134	2.02645	NA	1.22513	1	-1.10469	0.190942	0.841263	NA	0.174163	1
ENSG00000024048	UBR2	protein_coding	8840	0.97411	0.000753642	0.702172	0.243155	0.844539	1	0.68517	0.0785857	1.16694	0.0571409	0.94607	1	0.91925	0.00169243	-0.406002	0.606489	0.403728	1	1.01898	4.65671e-06	1.23088	0.183382	1.12882	1
ENSG00000024422	EHD2	protein_coding	3923	0.396694	0.853011	-0.265804	NA	0.103143	1	0.30536	0.89736	-1.01455	NA	-0.208635	1	-0.0760616	0.98388	0.359569	NA	0.158134	1	-0.370789	0.90066	-2.5846	NA	-1.08916	1
ENSG00000024526	DEPDC1	protein_coding	5904	-0.405843	0.435575	0.360628	0.794527	0.0277057	1	-0.222563	0.819945	0.139066	0.940761	-0.0304476	1	0.46838	0.672179	1.04525	NA	0.785458	1	0.149183	0.874872	2.88624	NA	2.08786	1
ENSG00000024862	CCDC28A	protein_coding	1507	-1.15729	0.413735	-0.0937188	NA	-0.529637	1	-0.780534	0.695149	0.503632	NA	-5.07593e-05	1	-0.599276	0.816876	-0.827935	NA	-0.70908	1	-0.595179	0.762695	-1.82843	NA	-1.08386	1
ENSG00000025039	RRAGD	protein_coding	5072	-0.645791	0.224135	0.833866	0.489471	0.275959	1	-0.335682	0.62339	0.671879	0.4842	0.254325	1	-0.0283819	0.971381	-0.957732	0.476045	-0.419483	1	-0.467016	0.265658	1.25434	0.398988	0.636471	1
ENSG00000025156	HSF2	protein_coding	2702	-0.578932	0.277043	-0.284126	0.8379	-0.424012	1	-0.398982	0.573746	-0.209436	0.870676	-0.301098	1	-0.485967	0.394698	0.961908	NA	0.412458	1	-0.306887	0.520906	1.28134	0.43127	0.695564	1
ENSG00000025293	PHF20	protein_coding	8383	1.9031	1.28419e-10	2.46901	7.00012e-05	2.21363	3.50007e-05	1.67835	2.00657e-05	1.73538	0.00758333	1.70714	0.0038017	2.20852	1.89145e-12	0.872323	0.36331	1.68988	1	2.16335	3.83267e-15	1.71897	0.161235	1.9582	1
ENSG00000025423	HSD17B6	protein_coding	2272	-0.833956	NA	-1.98329	NA	-1.29707	1	-2.47237	NA	NA	NA	0	1	0.996988	NA	-0.87613	NA	0.345201	1	-0.761308	NA	-1.70133	NA	-1.15607	1
ENSG00000025434	NR1H3	protein_coding	4533	-0.71834	0.574352	0.650228	NA	0.122482	1	-0.913946	0.679988	0.423901	NA	-0.0952022	1	-0.212077	0.916951	1.0351	NA	0.542286	1	-3.77875	0.033849	-5.69312	NA	-4.43928	1
ENSG00000025708	TYMP	protein_coding	3320	1.52252	NA	-2.11284	NA	0.634179	1	0.507628	NA	-2.0166	NA	-0.261145	1	1.43443	NA	-2.0888	NA	0.554751	1	-1.8673	0.482156	-2.66868	NA	-2.21305	1
ENSG00000025770	NCAPH2	protein_coding	3159	1.11206	0.0641042	0.107005	0.945207	0.695342	1	0.852645	0.311738	0.253828	0.882672	0.584084	1	0.0460979	0.968168	-0.626192	NA	-0.251236	1	0.892928	0.143123	0.660036	0.73795	0.781176	1
ENSG00000025772	TOMM34	protein_coding	2062	0.411125	0.628042	-0.750249	0.606191	-0.0557239	1	0.82912	0.404122	1.58842	0.408178	1.25816	1	0.198503	0.922892	-1.03584	NA	-0.2905	1	0.892048	0.411777	-0.0235868	NA	0.505684	1
ENSG00000025796	SEC63	protein_coding	8587	-0.331887	0.355471	0.0780245	0.937739	-0.112421	1	-0.379004	0.449027	-0.00242387	0.997521	-0.178461	1	-0.669877	0.0480062	-0.874042	0.288872	-0.768351	1	-0.686981	0.0143417	-0.122349	0.92749	-0.377217	1
ENSG00000025800	KPNA6	protein_coding	7480	-0.381454	0.274082	1.36084	0.0910147	0.73812	1	0.157497	0.775932	0.69964	0.311352	0.453886	1	-0.697981	0.0819312	1.63589	0.24893	0.89694	1	-0.373588	0.273337	-0.0735407	0.956779	-0.215778	1
ENSG00000026025	VIM	protein_coding	5158	0.7548	0.000619709	0.0364003	0.943203	0.439862	1	1.65739	0.000559254	0.833775	0.00435597	1.30358	0.00245761	1.20721	5.96313e-09	1.06206	0.118282	1.13646	1	0.975161	3.24088e-06	1.00323	0.189047	0.989266	1
ENSG00000026036	RTEL1-TNFRSF6B	protein_coding	8738	NA	NA	NA	NA	0	1	NA	NA	NA	NA	0	1	NA	NA	NA	NA	0	1	NA	NA	NA	NA	0	1
ENSG00000026103	FAS	protein_coding	4253	-1.58517	0.347392	-0.323504	NA	-0.820602	1	-0.803859	0.690292	-0.668464	NA	-0.734573	1	-1.62835	0.431058	0.700472	NA	-0.0376396	1	0.290879	0.866526	1.07254	NA	0.734012	1
ENSG00000026297	RNASET2	protein_coding	7643	-0.633656	0.637225	-1.6624	NA	-1.05821	1	-1.11884	0.525062	-1.87367	0.393513	-1.44745	1	-1.32639	0.394801	0.81962	NA	0.113504	1	-1.63344	0.29634	0.0210745	NA	-0.580965	1
ENSG00000026508	CD44	protein_coding	10057	0.283269	0.927564	-0.0365787	NA	0.132191	1	-1.56532	NA	-2.51251	NA	-1.96254	1	-0.707744	0.847517	-0.487418	NA	-0.593379	1	-2.20511	0.269228	-0.446075	NA	-1.07263	1
ENSG00000026559	KCNG1	protein_coding	5437	1.27943	0.471425	-1.16882	NA	0.522162	1	0.648063	0.680535	0.992561	NA	0.83057	1	2.72383	NA	0.854466	NA	2.07285	1	2.4146	0.0887122	1.68767	NA	2.09644	1
ENSG00000026652	AGPAT4	protein_coding	8769	-1.64682	3.82522e-07	-0.550426	0.58809	-0.996885	1	-1.36104	0.00459665	-1.39858	0.0596522	-1.37969	1	-1.74619	1.14013e-07	-1.26659	0.182928	-1.48655	1	-1.65189	7.67983e-07	-1.63818	0.10249	-1.64502	1
ENSG00000026751	SLAMF7	protein_coding	4833	1.75126	NA	-1.37783	NA	0.907397	1	0.309205	NA	-1.4401	NA	-0.315121	1	NA	NA	NA	NA	0	1	NA	NA	NA	NA	0	1
ENSG00000026950	BTN3A1	protein_coding	5547	-0.424841	0.729803	0.856855	NA	0.353892	1	-0.820492	0.603182	0.770669	NA	0.184159	1	-0.344995	0.819448	-2.0658	NA	-0.962738	1	-0.666249	0.519426	0.977509	NA	0.378071	1
ENSG00000027001	MIPEP	protein_coding	3407	1.04244	0.253785	1.23488	NA	1.14187	1	1.38034	0.316509	2.50933	NA	2.05256	1	0.805671	0.598453	1.56921	NA	1.23738	1	1.08997	0.354868	-0.176427	NA	0.591481	1
ENSG00000027075	PRKCH	protein_coding	8833	2.27466	0.226951	-2.34807	NA	1.33206	1	2.19496	0.428355	-2.08964	0.292553	1.26715	1	2.97078	0.265978	-2.1067	NA	2.01289	1	2.99148	NA	-3.18838	NA	2.01124	1
ENSG00000027644	INSRR	protein_coding	5101	1.77293	0.380857	-1.96576	NA	0.877143	1	2.93922	0.189852	-1.98618	0.211018	1.98593	1	2.31867	0.155686	-1.45883	NA	1.42022	1	-0.37766	0.433524	-3.07317	5.38387e-05	-1.17055	1
ENSG00000027697	IFNGR1	protein_coding	2571	-0.292323	0.724436	-0.136038	0.948549	-0.212065	1	-0.0187108	0.988658	-0.0763703	0.968844	-0.0472525	1	-0.3278	0.786033	0.0796337	NA	-0.109748	1	-0.383098	0.585397	-0.64206	NA	-0.506777	1
ENSG00000027847	B4GALT7	protein_coding	4927	0.520639	0.604958	0.795248	NA	0.664468	1	0.769617	0.602117	-0.682305	0.678822	0.219082	1	-0.820629	0.52659	0.233877	NA	-0.199101	1	0.36866	0.746255	-0.0217887	NA	0.186604	1
ENSG00000027869	SH2D2A	protein_coding	2512	0.361765	NA	-3.42439	NA	-0.537276	1	0.542684	NA	0.00130679	NA	0.297242	1	-0.287473	NA	NA	NA	0	1	-1.89621	NA	NA	NA	0	1
ENSG00000028116	VRK2	protein_coding	3509	-0.195957	0.798908	1.13169	0.539576	0.615482	1	-0.20486	0.897643	-0.122272	0.963038	-0.162975	1	0.292641	0.894188	0.949072	NA	0.657874	1	-0.0255923	0.986658	1.23905	NA	0.741076	1
ENSG00000028137	TNFRSF1B	protein_coding	3766	1.55567	NA	-1.10348	NA	0.767694	1	2.05981	NA	0.46494	NA	1.47238	1	-0.287473	NA	-2.93637	NA	-1.07404	1	0.0951944	NA	-2.71865	NA	-0.71297	1
ENSG00000028203	VEZT	protein_coding	8757	-0.0657461	0.868029	-0.355586	0.582211	-0.2034	1	-0.556171	0.142286	0.18407	0.833807	-0.139086	1	-0.315285	0.279983	-0.847274	0.178591	-0.556896	1	-0.53946	0.0159885	-0.768149	0.331728	-0.649278	1
ENSG00000028277	POU2F2	protein_coding	9072	1.37962	0.0500936	1.12188	0.41034	1.2565	1	0.723858	0.499506	0.500848	0.801155	0.616658	1	-0.0591681	0.924829	-0.985922	0.223207	-0.449375	1	0.451544	0.0686315	0.242806	0.826137	0.350947	1
ENSG00000028310	BRD9	protein_coding	9572	1.47828	0.000124425	0.678495	0.476173	1.13311	1	1.96384	0.000889807	2.01846	0.0389423	1.99141	0.0199161	1.25123	0.0171619	-1.39872	0.122035	0.464513	1	1.83484	1.31396e-05	0.52199	0.69627	1.32286	1
ENSG00000028528	SNX1	protein_coding	9780	0.045862	0.939276	0.748349	0.543058	0.439447	1	0.163888	0.834818	1.07931	0.40107	0.693022	1	-0.224691	0.735776	-0.910398	0.460059	-0.527183	1	-0.134069	0.807775	-0.944133	0.403801	-0.482977	1
ENSG00000028839	TBPL1	protein_coding	5039	-2.22085	0.000121733	-1.8451	0.171348	-2.02078	1	-1.33782	0.0678383	-0.813276	0.582551	-1.05184	1	-1.02964	0.0934155	0.398868	NA	-0.145361	1	-1.45977	0.000634765	-1.38862	0.271886	-1.42376	1
ENSG00000029153	ARNTL2	protein_coding	6983	-0.656514	0.436682	-0.39184	NA	-0.518116	1	-1.81183	0.149612	-3.11841	0.0121948	-2.322	1	-0.673332	0.306597	-0.709728	0.676315	-0.691415	1	-0.585913	0.272469	1.89387	NA	1.13177	1
ENSG00000029363	BCLAF1	protein_coding	9533	-0.477374	0.129726	0.188736	0.798753	-0.106212	1	-1.19785	0.00038427	-0.21892	0.803324	-0.626898	1	0.0981679	0.772926	0.388782	0.676128	0.25078	1	-0.0588692	0.882977	0.915908	0.25114	0.509327	1
ENSG00000029364	SLC39A9	protein_coding	7136	-1.78764	3.30011e-06	-1.39098	0.110613	-1.57572	1	-1.50886	0.00165381	-1.22754	0.14085	-1.36135	1	-1.90576	2.52206e-06	0.0367801	0.987541	-0.629615	1	-1.75128	6.10223e-06	-0.138063	0.943307	-0.730036	1
ENSG00000029534	ANK1	protein_coding	10799	3.05813	0.000166289	0.0287155	0.986896	2.22482	1	3.15005	0.0105067	1.7786	0.391909	2.6215	1	2.7891	1.6496e-07	1.0309	0.453101	2.16274	1	3.46982	2.93491e-11	2.05344	0.151547	2.92889	1
ENSG00000029559	IBSP	protein_coding	1546	NA	NA	NA	NA	0	1	NA	NA	NA	NA	0	1	1.45133	NA	-1.26744	NA	0.655353	1	NA	NA	NA	NA	0	1
ENSG00000029639	TFB1M	protein_coding	2736	0.569776	0.570571	0.713327	NA	0.643336	1	-0.177553	0.896297	1.45108	0.546389	0.855322	1	0.204564	0.894892	-0.470003	NA	-0.0936471	1	-0.282633	0.854797	-0.401977	NA	-0.341071	1
ENSG00000029725	RABEP1	protein_coding	6531	2.05506	9.06994e-14	1.66619	0.000570089	1.87369	0.000285045	1.81876	7.08232e-08	1.97198	3.27976e-05	1.8974	1.64342e-05	2.09767	6.49548e-24	1.16834	0.0394285	1.70658	0.0197143	2.23222	3.62542e-32	1.36162	0.0658733	1.86162	1
ENSG00000029993	HMGB3	protein_coding	3967	-0.743249	0.092332	-0.779322	0.412278	-0.761173	1	-0.598335	0.514935	-0.99925	0.36881	-0.784911	1	-0.331414	0.483841	-0.198663	0.896265	-0.263512	1	-0.315611	0.440096	-0.832599	0.48196	-0.55107	1
ENSG00000030066	NUP160	protein_coding	8576	1.96698	1.95623e-17	2.06345	2.2362e-06	2.01602	1.1181e-06	1.8499	8.31499e-08	1.69016	0.000129924	1.77224	6.50036e-05	1.32345	3.44413e-06	0.858918	0.306335	1.1098	1	1.58473	7.30484e-12	1.14476	0.162084	1.38145	1
ENSG00000030110	BAK1	protein_coding	2212	0.456865	0.743115	1.71699	NA	1.22035	1	-0.884437	0.640239	-1.6687	NA	-1.22392	1	0.349895	0.870827	-0.39654	NA	0.0244234	1	-0.996859	0.44127	1.06859	NA	0.377661	1
ENSG00000030304	MUSK	protein_coding	4246	0.835448	NA	-2.68985	NA	-0.0443958	1	NA	NA	-3.32248	NA	0	1	-0.331786	NA	-2.06228	NA	-0.951779	1	1.04281	NA	-1.70133	NA	0.243509	1
ENSG00000030419	IKZF2	protein_coding	12240	-2.20653	8.4602e-08	-1.56269	0.121682	-1.84899	1	-1.78306	0.00118921	-0.702933	0.568838	-1.14419	1	-2.09858	6.00698e-06	-0.82004	0.66542	-1.32208	1	-1.872	5.60055e-06	-1.40088	0.271886	-1.61729	1
ENSG00000030582	GRN	protein_coding	3680	0.107772	0.906285	1.39479	NA	0.890279	1	1.45813	0.131243	0.858779	0.561171	1.18936	1	1.1488	0.229819	2.63476	NA	2.07519	1	0.916944	0.177017	2.15567	NA	1.66536	1
ENSG00000031003	FAM13B	protein_coding	6808	-0.749137	0.0847771	-0.493859	0.617234	-0.615859	1	-2.24899	2.89938e-06	-1.94883	0.0155593	-2.09112	1	1.19024	1.25175e-06	0.491954	0.523173	0.882938	1	0.245153	0.839187	-0.155476	0.898253	0.0587006	1
ENSG00000031081	ARHGAP31	protein_coding	9384	3.07516	0.00432308	1.85861	NA	2.59149	1	2.05171	0.22735	1.48272	NA	1.79508	1	1.30466	0.585871	0.9971	NA	1.15906	1	2.72113	0.0387655	3.12858	NA	2.93919	1
ENSG00000031691	CENPQ	protein_coding	1733	-0.36377	0.729341	-1.36977	0.369721	-0.780803	1	-0.299258	0.886285	-1.36392	0.503933	-0.735529	1	-0.806531	0.669563	-0.0541539	NA	-0.381842	1	-0.0126672	0.994432	1.08923	NA	0.64102	1
ENSG00000031698	SARS	protein_coding	3836	2.01678	7.36185e-11	0.463	0.530922	1.43968	1	2.2221	2.04195e-10	1.19189	0.0135603	1.79706	0.00678017	1.33284	0.00162728	-0.319699	0.785255	0.731279	1	1.88377	2.38115e-10	0.0805082	0.954553	1.24725	1
ENSG00000031823	RANBP3	protein_coding	7445	0.433316	0.452335	1.17812	0.395101	0.853255	1	0.739259	0.361266	0.205234	0.891207	0.496816	1	0.314762	0.642148	0.0660182	0.972715	0.195744	1	1.13515	0.0144457	0.862147	0.606405	1.0051	1
ENSG00000032219	ARID4A	protein_coding	7568	1.2642	7.18699e-05	0.316093	0.684078	0.866666	1	0.577443	0.290447	0.563863	0.544063	0.570669	1	1.77607	4.88761e-13	-0.338239	0.641326	1.07585	1	1.34167	3.32454e-07	0.650612	0.602548	1.03713	1
ENSG00000032389	EIPR1	protein_coding	5775	0.35336	0.71032	-0.190474	NA	0.106918	1	0.507476	0.689302	0.553898	0.809364	0.530873	1	0.901668	0.355917	0.0291546	NA	0.53039	1	0.935033	0.200065	1.3254	NA	1.14338	1
ENSG00000032444	PNPLA6	protein_coding	7055	3.37183	8.40317e-22	2.99569	4.28568e-05	3.19598	2.14284e-05	3.88936	9.85346e-22	3.15857	2.37579e-07	3.56975	1.1879e-07	2.90762	1.1079e-13	1.4616	0.151496	2.35867	1	3.43668	5.71217e-32	2.78344	0.00531793	3.14672	0.00265896
ENSG00000032742	IFT88	protein_coding	6111	0.380461	0.542273	0.322743	0.827837	0.351891	1	0.0458114	0.96895	-0.317988	0.819883	-0.124651	1	-0.0788326	0.934157	-0.61511	0.72405	-0.322196	1	-0.0590955	0.931858	0.32549	0.871744	0.145975	1
ENSG00000033011	ALG1	protein_coding	4496	-1.13385	0.429482	0.162577	NA	-0.344663	1	0.33983	0.885649	2.82703	NA	2.0638	1	-0.3182	0.899825	1.3492	NA	0.744062	1	0.622342	0.694213	2.25586	NA	1.65891	1
ENSG00000033030	ZCCHC8	protein_coding	9124	0.403306	0.412729	0.668361	0.554461	0.541912	1	0.133193	0.873543	0.401377	0.750787	0.273508	1	0.200116	0.751442	0.443415	0.790122	0.326888	1	0.17316	0.723021	-0.798134	0.489024	-0.232245	1
ENSG00000033050	ABCF2	protein_coding	4448	2.03412	6.99658e-06	1.2461	0.244921	1.69325	1	2.82619	1.11345e-05	1.83181	0.0653043	2.41303	1	2.42224	6.53605e-06	1.15587	0.438502	1.92376	1	2.51888	4.45672e-09	2.03506	0.146773	2.29716	1
ENSG00000033100	CHPF2	protein_coding	4205	-0.145789	0.843273	-0.884234	0.435292	-0.468272	1	0.662533	0.294711	-0.304206	0.751278	0.258668	1	0.518169	0.416443	-0.618858	0.645129	0.0588865	1	1.04776	0.0139536	-0.318899	0.813678	0.520547	1
ENSG00000033122	LRRC7	protein_coding	14652	0.530889	0.784829	-0.885016	NA	-0.00991591	1	-0.597831	0.84646	-1.81542	NA	-1.08181	1	0.367825	0.369717	0.341262	0.773952	0.354605	1	-0.0968437	0.826193	-0.251678	0.853312	-0.172185	1
ENSG00000033170	FUT8	protein_coding	6700	0.72249	0.0460483	0.501447	0.497701	0.616198	1	1.10259	0.0619957	1.31763	0.162735	1.21411	1	0.433488	0.436351	0.284977	0.859288	0.361143	1	0.766984	0.092028	-0.143758	0.928272	0.382317	1
ENSG00000033178	UBA6	protein_coding	11432	0.135772	0.700313	1.26377	0.0321485	0.807317	1	-0.287872	0.545886	0.71572	0.301706	0.299486	1	-0.257491	0.505535	0.682114	0.480383	0.287491	1	-0.0448492	0.881814	1.03546	0.258039	0.594148	1
ENSG00000033327	GAB2	protein_coding	6771	-0.255284	0.685888	-0.276244	0.814072	-0.265726	1	0.0702461	0.938304	0.0173045	0.990327	0.0440182	1	0.307887	0.50468	0.237807	0.874839	0.273272	1	0.697824	0.0125124	0.24072	0.840433	0.487301	1
ENSG00000033627	ATP6V0A1	protein_coding	10955	1.20561	3.91782e-05	1.34995	0.038505	1.27958	0.0192721	1.21169	0.00131226	1.45074	0.0098164	1.33616	0.00556433	0.671038	0.0107637	0.646342	0.396211	0.658743	1	1.2963	1.81043e-06	0.666506	0.4108	1.0155	1
ENSG00000033800	PIAS1	protein_coding	10776	-0.524294	0.0882108	0.305453	0.713679	-0.0505729	1	-0.0181369	0.976944	0.23953	0.757581	0.116441	1	-0.749865	0.00720237	0.805155	0.423924	0.227736	1	-0.468928	0.0499524	0.450551	0.669203	0.0628563	1
ENSG00000033867	SLC4A7	protein_coding	9616	0.0530692	0.878506	0.62711	0.229789	0.368454	1	0.228262	0.575958	0.76178	0.075998	0.519544	1	-0.460385	0.142556	-0.598569	0.43527	-0.527823	1	-0.0824523	0.813192	0.138748	0.906173	0.0323833	1
ENSG00000034053	APBA2	protein_coding	6869	2.46611	6.21548e-14	1.00915	0.146926	1.91423	1	2.15988	3.90978e-07	1.23092	0.0884972	1.76891	1	1.90015	1.51034e-11	1.36613	0.0735189	1.65771	1	2.29137	3.09148e-15	0.908557	0.276367	1.75966	1
ENSG00000034152	MAP2K3	protein_coding	3783	0.439023	0.703923	0.950727	NA	0.717444	1	1.68357	0.129586	1.4344	0.483588	1.56436	1	-0.00976821	0.994872	0.46176	NA	0.245175	1	0.518898	0.635117	-0.385279	NA	0.136514	1
ENSG00000034239	EFCAB1	protein_coding	5805	-1.54172	NA	-2.30766	NA	-1.87445	1	-3.00159	NA	-3.21968	NA	-3.10652	1	1.94404	NA	-0.78612	NA	1.14656	1	0.0860455	NA	-0.620009	NA	-0.224213	1
ENSG00000034510	TMSB10	protein_coding	496	-0.00645029	0.990959	-1.63818	0.00108826	-0.602963	1	-0.360838	0.588225	-1.38174	0.0331037	-0.782809	1	-0.446338	0.187743	-2.73147	2.31106e-09	-1.17711	1	-0.374644	0.208976	-2.34164	0.000145551	-1.04605	1
ENSG00000034533	ASTE1	protein_coding	3427	0.73963	0.656676	0.685621	NA	0.712878	1	0.874024	0.662507	2.02997	NA	1.5648	1	0.491254	NA	-1.26744	NA	-0.13522	1	0.890033	0.63788	0.854082	NA	0.87217	1
ENSG00000034677	RNF19A	protein_coding	6031	0.880997	0.028851	1.00319	0.302236	0.943385	1	0.511967	0.428118	1.56192	0.116188	1.13042	1	0.780701	0.103593	0.0960455	0.948706	0.478612	1	1.02457	0.000581441	0.697711	0.540966	0.870376	1
ENSG00000034693	PEX3	protein_coding	2222	-0.863253	0.38463	0.551831	NA	0.0112503	1	-0.912353	0.372173	-0.317553	0.89384	-0.584515	1	-0.99825	0.326779	0.0920699	NA	-0.35245	1	-1.86149	0.0175941	-0.840273	NA	-1.26235	1
ENSG00000034713	GABARAPL2	protein_coding	3034	-1.47056	0.0127129	-1.93507	0.0611293	-1.6842	1	-0.600391	0.538328	-0.908083	0.49966	-0.746049	1	-1.36348	0.00325013	-0.88172	0.546245	-1.10258	1	-1.4936	0.000292227	-1.41999	0.264335	-1.45633	1
ENSG00000034971	MYOC	protein_coding	2099	1.75126	NA	-2.29385	NA	0.836105	1	NA	NA	NA	NA	0	1	1.42629	NA	-1.28656	NA	0.631096	1	NA	NA	NA	NA	0	1
ENSG00000035115	SH3YL1	protein_coding	11165	-1.58922	0.00368182	-1.13726	0.388959	-1.34562	1	-1.97091	0.0121063	-2.02884	0.0727868	-1.99958	1	-2.18757	0.000737104	-2.68545	0.0258904	-2.41514	1	-1.86078	0.000303513	-0.950052	0.599464	-1.33471	1
ENSG00000035141	FAM136A	protein_coding	3086	-1.53685	0.0177697	-0.946601	0.583619	-1.21175	1	-1.24493	0.21166	-2.16423	0.0613745	-1.63257	1	-1.31332	0.227049	-1.07512	NA	-1.18931	1	-1.6728	0.0977178	-2.13854	NA	-1.88696	1
ENSG00000035403	VCL	protein_coding	9992	1.694	8.5266e-12	1.9919	2.1295e-05	1.85062	1.06475e-05	2.56169	7.7697e-17	2.27917	1.03218e-09	2.42734	5.16092e-10	1.40826	4.46259e-06	1.60303	0.118817	1.50893	1	2.18937	9.351e-19	2.64856	0.00022247	2.43716	0.000111235
ENSG00000035499	DEPDC1B	protein_coding	3806	0.486573	0.339338	0.145291	0.895796	0.326	1	0.72808	0.32051	0.887725	0.462075	0.81011	1	0.345297	0.75136	4.06329	NA	3.16896	1	0.455337	0.539509	1.17924	NA	0.862225	1
ENSG00000035664	DAPK2	protein_coding	13612	-2.33976	0.335765	-2.78434	NA	-2.54499	1	-1.10585	NA	-1.4629	NA	-1.27335	1	0.424248	NA	-1.28656	NA	-0.191163	1	1.59002	NA	-0.711262	NA	0.85652	1
ENSG00000035681	NSMAF	protein_coding	6165	0.652925	0.247608	1.17027	0.391766	0.934664	1	0.122154	0.91163	0.490534	0.780117	0.31807	1	-0.136597	0.871469	-1.04508	0.435355	-0.52048	1	0.482536	0.342802	0.209561	0.916007	0.352495	1
ENSG00000035687	ADSS	protein_coding	3666	-0.0377131	0.949687	0.80639	0.443086	0.445212	1	0.706784	0.260633	0.876605	0.387964	0.794192	1	0.275777	0.649379	0.0709921	0.962935	0.177015	1	0.329656	0.452151	0.842548	0.530446	0.608775	1
ENSG00000035720	STAP1	protein_coding	1655	NA	NA	NA	NA	0	1	NA	NA	NA	NA	0	1	1.48924	NA	-2.45148	NA	0.580256	1	NA	NA	NA	NA	0	1
ENSG00000035862	TIMP2	protein_coding	5633	-0.67424	0.09527	-0.468358	0.660715	-0.567629	1	-0.531703	0.461864	-0.0375915	0.981697	-0.263596	1	-0.544582	0.166417	-0.213918	0.862799	-0.369797	1	-0.450875	0.111695	-0.432683	0.689248	-0.441751	1
ENSG00000035928	RFC1	protein_coding	6719	1.60415	1.53655e-08	1.56385	0.00601314	1.58414	0.00300658	1.80158	9.18427e-07	1.59572	0.0088493	1.70232	0.00442511	2.28759	1.19636e-12	0.967871	0.295869	1.77365	1	2.23115	1.38611e-16	0.250341	0.82602	1.55693	1
ENSG00000036054	TBC1D23	protein_coding	5168	-0.18056	0.783002	0.25544	0.875877	0.0538486	1	0.0662128	0.9403	0.482577	0.72543	0.289364	1	-0.344503	0.606386	-0.234587	0.900326	-0.288498	1	-0.449566	0.407661	-0.107426	0.957419	-0.268377	1
ENSG00000036257	CUL3	protein_coding	11505	1.54607	3.5337e-10	1.61077	0.00122723	1.57878	0.000613613	1.27898	0.000112698	1.76746	6.99655e-05	1.54379	9.13318e-05	1.08611	2.0228e-05	0.771898	0.31301	0.937539	1	1.30592	2.03716e-10	0.94019	0.230637	1.13461	1
ENSG00000036448	MYOM2	protein_coding	7062	3.40778	0.0154367	0.83345	NA	2.63169	1	1.74511	0.373398	-0.0457295	NA	1.11137	1	1.87671	0.142556	-0.140801	NA	1.19515	1	2.57632	0.0938402	0.745391	NA	1.93369	1
ENSG00000036473	OTC	protein_coding	1585	NA	NA	NA	NA	0	1	-1.3286	NA	NA	NA	0	1	1.48924	NA	-1.3335	NA	0.679969	1	NA	NA	-3.60387	NA	0	1
ENSG00000036530	CYP46A1	protein_coding	9352	0.198717	0.932827	0.51179	NA	0.363729	1	-0.713127	0.661915	-0.153928	NA	-0.406602	1	-0.564535	0.699662	1.66609	NA	0.944752	1	0.303535	0.814821	-0.336336	NA	0.0187872	1
ENSG00000036549	ZZZ3	protein_coding	9008	1.33498	7.18268e-05	1.25495	0.0272443	1.29552	0.0136581	0.938241	0.0275847	1.28197	0.0596645	1.12032	1	1.83329	5.62031e-11	2.2302	0.00585176	2.04535	0.00292588	1.82297	1.29901e-12	1.7264	0.0461407	1.77549	0.0230704
ENSG00000036565	SLC18A1	protein_coding	3910	-0.673643	0.676097	-1.34568	NA	-0.97088	1	0.069964	0.978997	-1.69662	NA	-0.558305	1	-1.35367	0.569756	-1.0335	NA	-1.18472	1	-1.84486	0.3624	-1.87322	NA	-1.85897	1
ENSG00000036672	USP2	protein_coding	4538	1.117	0.624338	0.529799	NA	0.853072	1	2.27889	0.459669	0.0231574	NA	1.55317	1	0.0915935	0.979308	0.613553	NA	0.376051	1	1.58491	0.491498	0.648209	NA	1.19128	1
ENSG00000036828	CASR	protein_coding	10625	1.14779	NA	-2.69809	NA	0.24479	1	2.01566	NA	-1.47439	NA	1.13867	1	0.828474	NA	-1.57225	NA	0.078671	1	1.1292	NA	-1.55778	NA	0.33745	1
ENSG00000037042	TUBG2	protein_coding	2772	-0.512645	0.707502	1.50081	NA	0.820061	1	0.165673	0.948519	-2.33064	0.122925	-0.598932	1	-0.886009	0.445383	-0.992523	NA	-0.938283	1	-0.487965	0.637274	-1.21823	NA	-0.807375	1
ENSG00000037241	RPL26L1	protein_coding	1164	-0.67618	0.714415	-0.86292	NA	-0.766531	1	-1.01952	0.589072	0.387729	NA	-0.15071	1	-0.113606	0.972584	0.589431	NA	0.28032	1	-0.84637	0.76848	-0.293526	NA	-0.543627	1
ENSG00000037280	FLT4	protein_coding	8852	1.59654	0.25175	-1.58782	NA	0.747105	1	2.78179	0.188843	-1.26688	0.475221	1.86644	1	3.17732	0.195001	1.92156	NA	2.68196	1	1.58028	0.63261	0.147909	NA	1.035	1
ENSG00000037474	NSUN2	protein_coding	5506	0.782358	0.0703104	0.602905	0.560931	0.69542	1	0.74647	0.27455	0.305191	0.786449	0.542637	1	0.638422	0.247635	0.344286	0.83155	0.498837	1	1.08638	0.00936045	0.781459	0.606131	0.94196	1
ENSG00000037637	FBXO42	protein_coding	8984	0.690506	0.132905	0.438832	0.687908	0.57015	1	0.450758	0.511135	0.381231	0.759914	0.416414	1	0.481654	0.304435	0.361056	0.787417	0.422615	1	0.486913	0.202731	1.11407	0.447209	0.834305	1
ENSG00000037749	MFAP3	protein_coding	4792	-0.884147	0.0910312	0.210988	0.906551	-0.235069	1	-0.812853	0.310458	-1.04408	0.330207	-0.923839	1	-0.387712	0.543951	0.459807	0.814594	0.0974077	1	-0.529946	0.315083	1.02692	0.588906	0.449032	1
ENSG00000037757	MRI1	protein_coding	3456	-2.01073	0.0493397	-1.55093	NA	-1.76259	1	-1.26664	0.292837	-0.783457	NA	-1.00492	1	-1.52345	0.0503723	-1.22356	NA	-1.36573	1	-2.31838	0.000897975	-1.3109	NA	-1.72843	1
ENSG00000037897	METTL1	protein_coding	2621	0.7585	0.723948	0.969547	NA	0.867879	1	-0.243954	0.919434	1.94487	NA	1.23096	1	2.33593	NA	-0.403176	NA	1.53728	1	0.639537	NA	0.329775	NA	0.492954	1
ENSG00000037965	HOXC8	protein_coding	1889	NA	NA	-3.54752	NA	0	1	1.72813	NA	-0.0428761	NA	1.09886	1	2.64105	NA	-2.72264	NA	1.67567	1	1.04281	NA	-2.92194	NA	0.13237	1
ENSG00000038002	AGA	protein_coding	2675	-1.57821	0.208991	-1.46577	NA	-1.52089	1	-2.36695	0.134871	-3.21815	0.0770795	-2.73066	1	-1.07144	0.61962	0.868108	NA	0.20233	1	-2.93199	0.110054	-1.76691	NA	-2.2349	1
ENSG00000038210	PI4K2B	protein_coding	3540	-1.5198	0.0983576	0.219241	NA	-0.402726	1	-1.26009	0.440521	0.470853	NA	-0.149244	1	-1.09135	0.328845	1.89888	NA	1.06989	1	-1.68225	0.0879202	-0.530769	NA	-0.994553	1
ENSG00000038219	BOD1L1	protein_coding	15860	2.9181	1.35717e-38	2.04146	2.86498e-09	2.54537	1.43249e-09	2.50744	1.03002e-20	1.84834	1.5639e-07	2.21521	7.81952e-08	3.16099	3.8238e-71	1.26753	0.0349458	2.50487	0.0174729	3.17182	2.58293e-79	1.92464	0.0148834	2.679	0.00744172
ENSG00000038274	MAT2B	protein_coding	5153	-1.22626	0.0030952	-0.814951	0.397938	-1.006	1	-0.450629	0.487727	0.254536	0.844192	-0.0553846	1	-0.93943	0.164736	0.856942	NA	0.22196	1	-0.459106	0.39604	0.694687	0.71736	0.230184	1
ENSG00000038295	TLL1	protein_coding	7522	1.22059	0.624169	0.531739	NA	0.916895	1	-0.208125	NA	-0.286071	NA	-0.246572	1	1.19941	0.493708	1.3155	NA	1.25862	1	1.30334	0.174732	1.11793	NA	1.21361	1
ENSG00000038358	EDC4	protein_coding	6173	2.62987	1.32347e-14	2.56928	0.000266885	2.59989	0.000133443	3.30876	1.90034e-09	2.20207	0.0058649	2.85903	0.00293245	2.55317	2.26943e-13	2.11872	0.0223841	2.35224	0.011192	2.95501	1.25455e-17	1.85328	0.0491162	2.50686	0.0245581
ENSG00000038382	TRIO	protein_coding	17500	2.73468	3.91978e-44	1.8397	1.85201e-08	2.3555	9.26007e-09	2.42223	3.46052e-21	1.78241	2.95282e-11	2.1375	1.47641e-11	2.94184	5.56937e-66	1.77751	1.23784e-05	2.47408	6.18919e-06	3.25038	6.01142e-102	1.94578	0.000596329	2.74078	0.000298164
ENSG00000038427	VCAN	protein_coding	14831	1.39265	9.17407e-14	1.44376	1.07961e-05	1.41843	5.39804e-06	1.43066	2.46066e-08	1.36057	1.00669e-05	1.39604	5.04577e-06	1.06375	2.96801e-10	-0.678253	0.212502	0.441097	1	1.39719	5.61267e-20	0.891823	0.230471	1.16652	1
ENSG00000038532	CLEC16A	protein_coding	12387	1.59979	4.37764e-06	1.52953	0.0599293	1.56509	1	1.46582	0.0015475	0.96946	0.237406	1.23888	1	1.70682	7.06742e-07	1.73719	0.0615356	1.72208	1	1.99803	2.54349e-11	0.562179	0.605229	1.45181	1
ENSG00000038945	MSR1	protein_coding	7812	1.17163	NA	-3.65725	NA	0.221521	1	1.56198	NA	-2.07159	NA	0.673779	1	1.00908	NA	-1.38602	NA	0.260172	1	-1.12746	NA	-3.60387	NA	-1.88905	1
ENSG00000039068	CDH1	protein_coding	6177	0.098394	0.956296	0.828286	NA	0.509015	1	-1.02477	0.60222	0.925105	NA	0.257198	1	-1.00597	NA	-2.13936	NA	-1.46412	1	-0.701669	NA	-1.55778	NA	-1.06713	1
ENSG00000039123	SKIV2L2	protein_coding	6578	1.85507	2.27086e-11	2.52365	1.0008e-06	2.22775	5.00413e-07	1.71357	5.17801e-08	2.22071	5.53804e-06	1.98931	2.79491e-06	1.64195	4.61442e-08	0.860236	0.289904	1.3034	1	1.98311	5.38717e-17	1.566	0.0454718	1.78958	0.0227359
ENSG00000039139	DNAH5	protein_coding	16475	2.14546	0.000409478	0.993033	0.460286	1.68138	1	2.0318	0.0207248	0.717798	0.638726	1.5195	1	1.87829	0.00254354	0.357731	0.843086	1.3097	1	2.08563	9.26484e-06	0.952784	0.536682	1.62766	1
ENSG00000039319	ZFYVE16	protein_coding	11461	1.05124	9.76205e-05	1.45208	0.00145916	1.26554	0.000778391	0.735956	0.0582135	1.29843	0.00598707	1.04443	1	1.07999	0.00049332	0.646467	0.505923	0.879453	1	1.23497	1.71203e-07	1.24791	0.23065	1.24145	1
ENSG00000039523	RIPOR1	protein_coding	6729	1.70327	5.44161e-07	1.2703	0.0906321	1.50297	1	1.98921	1.16583e-06	1.1753	0.0472976	1.63891	0.0236494	1.19892	0.000282079	1.55487	0.0896917	1.38784	1	1.55134	2.82101e-09	0.285063	0.790556	1.05289	1
ENSG00000039537	C6	protein_coding	4739	NA	NA	-3.15827	NA	0	1	0.474498	NA	-2.3883	NA	-0.339671	1	-0.184537	0.938414	-0.494747	NA	-0.33132	1	0.9398	NA	-1.81579	NA	0.139019	1
ENSG00000039560	RAI14	protein_coding	7687	1.45133	3.4153e-09	1.64165	0.000980369	1.54963	0.000490186	1.40989	5.59272e-05	1.63904	0.00270874	1.52901	0.00138233	1.55004	2.28953e-05	3.0143	0.0206975	2.46048	0.0103602	2.2069	6.07092e-17	3.1632	0.000448905	2.76287	0.000224453
ENSG00000039600	SOX30	protein_coding	3471	2.51516	NA	-2.58122	NA	1.55672	1	-1.72164	NA	-3.21968	NA	-2.28438	1	-0.726967	NA	NA	NA	0	1	1.26487	NA	-0.659988	NA	0.602144	1
ENSG00000039650	PNKP	protein_coding	4635	0.0589459	0.956483	-0.273308	NA	-0.0976373	1	0.919137	0.473088	-0.227969	0.919171	0.456711	1	-0.177859	0.877023	-0.914847	NA	-0.499796	1	0.0500315	0.965314	-0.173332	NA	-0.0573319	1
ENSG00000039987	BEST2	protein_coding	2646	1.68758	NA	-3.81608	NA	0.719037	1	1.22151	NA	-1.14933	NA	0.476503	1	2.2697	NA	-0.366127	NA	1.48493	1	1.34308	NA	-0.571417	NA	0.682515	1
ENSG00000040199	PHLPP2	protein_coding	12493	1.13473	0.00289003	1.5912	0.0427299	1.38094	0.02281	0.927111	0.132812	0.809369	0.40721	0.869441	1	1.38761	0.000119516	1.0345	0.277818	1.22183	1	1.35443	2.68888e-06	0.915887	0.363537	1.15176	1
ENSG00000040275	SPDL1	protein_coding	4777	0.497852	0.364734	0.0602324	0.965025	0.295572	1	0.828045	0.289827	0.204909	0.895569	0.549862	1	0.812858	0.215916	0.342976	0.868487	0.596963	1	0.828027	0.13704	0.00565801	0.996908	0.474662	1
ENSG00000040341	STAU2	protein_coding	8998	-0.924817	0.0065309	-0.0835496	0.944345	-0.443713	1	-1.42845	0.00135733	-0.788355	0.423794	-1.07319	1	-1.36493	1.59664e-05	-0.324539	0.810256	-0.752913	1	-1.34811	3.03138e-06	-0.524638	0.661274	-0.878402	1
ENSG00000040487	PQLC2	protein_coding	2686	0.248811	0.867832	-0.987604	NA	-0.240808	1	0.640515	0.758056	1.37091	NA	1.05145	1	0.363457	0.803066	-1.4677	NA	-0.279229	1	0.286652	0.804579	1.01934	NA	0.699015	1
ENSG00000040531	CTNS	protein_coding	3398	-0.14639	0.91993	-1.26246	NA	-0.599091	1	0.403629	0.852206	-0.480714	NA	0.0281832	1	0.921782	0.586137	2.87393	NA	2.20556	1	1.31962	0.362178	-0.774924	NA	0.623129	1
ENSG00000040608	RTN4R	protein_coding	3339	2.06112	0.0210611	-0.123148	NA	1.34803	1	2.25928	0.0526009	-0.2291	0.90762	1.49587	1	2.3645	0.026513	0.760189	NA	1.77473	1	2.70537	6.18734e-05	1.73411	NA	2.29997	1
ENSG00000040633	PHF23	protein_coding	2783	0.744316	0.134548	-0.657018	0.492831	0.207498	1	1.53726	0.0411135	0.0948893	0.94822	0.989287	1	1.09676	0.0269999	-0.949632	0.35223	0.409529	1	1.37263	0.00651301	0.252931	0.878014	0.918783	1
ENSG00000040731	CDH10	protein_coding	3660	0.856126	0.14302	1.11984	0.444749	0.994002	1	1.15234	0.241914	0.702454	0.646733	0.944861	1	-0.00942478	0.993772	-0.142609	0.951025	-0.0744805	1	0.102546	0.847192	-1.45435	0.149507	-0.475349	1
ENSG00000040933	INPP4A	protein_coding	13187	0.931067	0.00306838	0.352707	0.654829	0.670677	1	0.912865	0.128293	1.40437	0.0596522	1.17945	1	0.726768	0.0118616	0.909374	0.318793	0.820958	1	0.863495	0.000406688	1.40974	0.138316	1.16232	1
ENSG00000041353	RAB27B	protein_coding	7432	-1.5132	0.4258	-0.627693	NA	-1.00355	1	-0.187903	NA	0.407244	NA	0.140144	1	-1.66671	0.0374496	0.602533	NA	-0.125517	1	-2.00554	0.000106531	-1.32094	0.430352	-1.62301	1
ENSG00000041357	PSMA4	protein_coding	6996	-0.135557	0.822261	-0.628523	0.550443	-0.361086	1	0.468645	0.593233	-0.0420062	0.976927	0.235796	1	-0.193786	0.824862	0.0941837	0.967306	-0.0426278	1	0.372926	0.477583	0.231208	0.899228	0.303806	1
ENSG00000041515	MYO16	protein_coding	9209	3.47083	7.48274e-09	2.18743	0.0586921	2.96737	1	2.44724	0.000128035	1.01118	0.431757	1.90097	1	2.71971	1.1079e-13	1.44193	0.17234	2.21789	1	2.86334	3.10238e-26	2.18353	0.00822713	2.56311	0.00411356
ENSG00000041802	LSG1	protein_coding	4818	1.68691	0.000198061	1.36409	0.21265	1.53451	1	1.62159	0.00876997	0.675214	0.536668	1.22465	1	1.80987	0.0112584	-0.268142	0.888554	1.11653	1	1.98317	0.00029202	0.867043	0.614594	1.53045	1
ENSG00000041880	PARP3	protein_coding	2928	0.786252	NA	-1.14684	NA	0.121812	1	-2.37252	NA	-4.65804	NA	-3.10335	1	0.962933	0.667856	0.489048	NA	0.745361	1	-0.72159	0.755468	-1.31299	NA	-0.987195	1
ENSG00000041982	TNC	protein_coding	9636	1.79477	0.00968164	1.53586	0.344569	1.67111	1	1.41101	0.116959	-0.120613	0.935741	0.839571	1	2.0303	0.0155438	0.633028	NA	1.4946	1	1.69246	0.0405771	1.02419	NA	1.39668	1
ENSG00000041988	THAP3	protein_coding	4072	0.723877	0.537848	0.990578	NA	0.863381	1	0.27547	0.886811	-0.0711817	NA	0.112531	1	0.445227	0.811534	-1.00319	NA	-0.104369	1	-0.270693	0.860475	-2.25067	NA	-0.944739	1
ENSG00000042062	RIPOR3	protein_coding	6009	-0.425261	NA	-2.07194	NA	-1.02541	1	0.0522088	0.984055	0.868988	NA	0.517645	1	1.69128	NA	0.27275	NA	1.14976	1	0.713823	NA	-1.47344	NA	0.000193092	1
ENSG00000042088	TDP1	protein_coding	6227	0.243403	0.689204	0.592744	0.651256	0.428622	1	0.740222	0.349207	1.97695	0.133368	1.48723	1	1.06694	0.150444	0.506694	NA	0.813843	1	0.890907	0.0763675	0.927531	0.580342	0.909335	1
ENSG00000042286	AIFM2	protein_coding	5135	0.0686933	NA	-3.88933	NA	-0.841341	1	0.836297	0.826078	-0.523228	NA	0.311081	1	0.947731	0.746653	1.09049	NA	1.02087	1	0.587128	0.772168	-1.06856	NA	-0.0151944	1
ENSG00000042304	C2orf83	protein_coding	3486	NA	NA	NA	NA	0	1	NA	NA	NA	NA	0	1	NA	NA	NA	NA	0	1	0.9398	NA	-1.81579	NA	0.139019	1
ENSG00000042317	SPATA7	protein_coding	6872	0.227627	0.789594	1.43569	NA	0.954577	1	-0.330012	0.779159	-0.260445	0.883243	-0.294809	1	0.352395	0.774416	-1.57641	NA	-0.311154	1	0.218184	0.762695	-0.465085	0.806753	-0.0833733	1
ENSG00000042429	MED17	protein_coding	16610	-0.559386	0.637748	0.0601379	NA	-0.216622	1	-1.47242	0.225321	-1.36768	NA	-1.4191	1	0.133523	0.933862	0.195479	NA	0.164833	1	-0.461256	0.654321	0.831745	NA	0.325496	1
ENSG00000042445	RETSAT	protein_coding	4005	0.175734	0.866408	0.0682271	NA	0.122982	1	1.47655	0.145312	0.301392	0.872441	1.00546	1	-0.691804	0.580282	1.2302	NA	0.568065	1	0.00208658	0.998711	3.53345	NA	2.65313	1
ENSG00000042493	CAPG	protein_coding	2607	-2.09843	NA	NA	NA	0	1	0.261317	0.930998	-0.0382352	NA	0.119301	1	NA	NA	NA	NA	0	1	0.441139	NA	-2.26724	NA	-0.353467	1
ENSG00000042753	AP2S1	protein_coding	1704	0.793235	0.246514	0.000654581	0.999489	0.450702	1	0.950512	0.47998	0.0881411	0.970223	0.582825	1	1.03542	0.279214	1.2178	NA	1.12949	1	1.05601	0.228478	0.0644465	NA	0.643793	1
ENSG00000042781	USH2A	protein_coding	20506	2.90534	0.201147	-1.60613	NA	1.96724	1	2.53586	0.130039	-0.224708	0.93238	1.73444	1	0.971776	0.602869	0.176538	NA	0.628271	1	1.33825	0.198244	0.992418	NA	1.17567	1
ENSG00000042813	ZPBP	protein_coding	2643	NA	NA	NA	NA	0	1	NA	NA	NA	NA	0	1	-0.319659	NA	NA	NA	0	1	NA	NA	NA	NA	0	1
ENSG00000042832	TG	protein_coding	11132	0.817494	NA	-1.42279	NA	0.094461	1	-0.954387	0.725113	-0.38075	NA	-0.639244	1	-2.99031	0.123365	-2.15592	NA	-2.51362	1	-1.63265	NA	-3.79165	NA	-2.34115	1
ENSG00000042980	ADAM28	protein_coding	9351	-1.96306	0.23614	-0.309937	NA	-0.91164	1	-3.19749	NA	-1.4643	NA	-2.08492	1	1.29891	NA	-0.120806	NA	0.757067	1	NA	NA	NA	NA	0	1
ENSG00000043039	BARX2	protein_coding	3660	0.279234	NA	-1.37783	NA	-0.323418	1	0.629622	NA	-1.15772	NA	-0.0033358	1	NA	NA	-2.93637	NA	0	1	NA	NA	-3.54255	NA	0	1
ENSG00000043093	DCUN1D1	protein_coding	8412	-1.8221	1.38004e-05	0.389808	0.842952	-0.328228	1	-1.86905	0.000365087	-0.665092	0.637855	-1.14496	1	-1.63306	0.000803777	1.1398	NA	0.336806	1	-2.05412	5.26201e-07	0.789408	NA	-0.0224195	1
ENSG00000043143	JADE2	protein_coding	9877	-0.0886628	0.96357	-0.113323	NA	-0.10094	1	1.76039	0.12165	1.3325	0.501321	1.56225	1	1.94916	0.35361	0.565753	NA	1.41729	1	0.983264	0.352295	2.55592	NA	1.97404	1
ENSG00000043355	ZIC2	protein_coding	3310	-0.0159973	0.971038	1.05453	0.122038	0.616362	1	0.643412	0.253594	2.47659	0.0148607	1.83346	1	0.480484	0.143831	0.713933	0.410745	0.601925	1	0.62768	0.320513	2.36024	NA	1.73977	1
ENSG00000043462	LCP2	protein_coding	7244	NA	NA	NA	NA	0	1	-1.3286	NA	-4.48872	NA	-2.17561	1	0.433073	NA	-1.3335	NA	-0.195194	1	NA	NA	-3.54255	NA	0	1
ENSG00000043514	TRIT1	protein_coding	2663	-0.753299	0.244527	-0.428191	0.806646	-0.581606	1	-0.78723	0.357622	-1.5159	0.152725	-1.10604	1	-1.65044	0.00727933	-1.82025	0.175931	-1.73285	1	-1.42154	0.00328086	-1.69025	0.189733	-1.54965	1
ENSG00000043591	ADRB1	protein_coding	2853	-1.21557	NA	-4.31407	NA	-2.05626	1	-0.523312	NA	-2.35434	NA	-1.16597	1	0.611237	NA	-0.491441	NA	0.162779	1	-0.892445	0.710893	-0.603514	NA	-0.740758	1
ENSG00000044012	GUCA2B	protein_coding	597	NA	NA	NA	NA	0	1	NA	NA	NA	NA	0	1	NA	NA	NA	NA	0	1	NA	NA	NA	NA	0	1
ENSG00000044090	CUL7	protein_coding	5628	3.36275	8.64042e-43	2.5929	1.35474e-09	3.02857	6.77371e-10	3.97829	2.0435e-36	3.08667	2.17249e-19	3.60029	1.08624e-19	3.03823	1.48268e-23	1.61618	0.0250715	2.49575	0.0125358	3.35352	1.52782e-39	3.30802	9.70134e-05	3.33095	4.85067e-05
ENSG00000044115	CTNNA1	protein_coding	8830	2.62727	1.19346e-30	2.29988	7.85401e-10	2.47284	3.92701e-10	3.04379	6.63633e-25	2.77421	6.33918e-19	2.91529	3.16959e-19	2.27132	1.7512e-12	1.48852	0.0661952	1.93238	1	2.71916	4.31213e-38	2.22787	0.00172982	2.49433	0.000864909
ENSG00000044446	PHKA2	protein_coding	9029	2.07607	1.83181e-08	1.82919	0.0340799	1.95791	0.0170399	2.00509	0.000126743	1.88618	0.0244416	1.94686	0.0122842	1.47733	0.00652934	1.64847	0.298165	1.56544	1	1.75811	0.000118189	1.66401	0.28716	1.71183	1
ENSG00000044459	CNTLN	protein_coding	11064	-0.356756	0.431817	-0.164808	0.886014	-0.257592	1	-0.862276	0.189778	-1.40074	0.110569	-1.10653	1	-0.279698	0.726866	-0.953511	0.515672	-0.577619	1	-0.317366	0.634184	0.837817	NA	0.372884	1
ENSG00000044524	EPHA3	protein_coding	6674	1.46958	2.71875e-05	2.00378	0.00196415	1.76126	0.000995667	1.02329	0.152217	1.02144	0.46248	1.02236	1	0.660017	0.12156	-0.193069	0.883526	0.295631	1	0.612646	0.138771	-0.485196	0.748836	0.165726	1
ENSG00000044574	HSPA5	protein_coding	3908	-0.245793	0.542273	-1.10264	0.0792066	-0.611518	1	0.316213	0.44208	-0.359119	0.380246	0.017707	1	-0.0935411	0.869994	-1.52487	0.0911916	-0.638535	1	0.120759	0.755537	-0.91176	0.331774	-0.305037	1
ENSG00000046604	DSG2	protein_coding	6190	0.714435	0.0274692	1.054	0.127782	0.894184	1	1.18422	0.0394102	1.44268	0.032247	1.31923	0.0358286	0.909844	0.207662	1.6433	0.379825	1.32269	1	0.788798	0.156078	2.50192	0.0776466	1.88597	1
ENSG00000046647	GEMIN8	protein_coding	2424	-1.45983	0.216119	0.659248	NA	-0.0418657	1	-0.378665	0.866027	1.37703	NA	0.751244	1	-0.57886	0.749905	-1.77901	NA	-1.05758	1	-0.986896	0.486579	-0.819545	NA	-0.900795	1
ENSG00000046651	OFD1	protein_coding	5172	0.309527	0.612819	-0.328748	0.78735	0.0254035	1	-0.606634	0.433376	-0.463339	0.755649	-0.533208	1	0.728605	0.207536	-0.829383	0.463447	0.150433	1	-0.170035	0.787795	-1.5135	0.187004	-0.690728	1
ENSG00000046653	GPM6B	protein_coding	5675	-1.70888	4.83033e-07	-0.870131	0.293233	-1.22939	1	-1.60597	0.000985828	-1.35785	0.070653	-1.47658	1	-1.91035	5.61519e-07	-1.00841	0.411992	-1.39001	1	-2.04769	7.65424e-11	-0.703443	0.637545	-1.22436	1
ENSG00000046774	MAGEC2	protein_coding	1991	NA	NA	-3.15827	NA	0	1	0.475727	NA	-0.703823	NA	0.003287	1	-0.349544	NA	NA	NA	0	1	NA	NA	-3.60387	NA	0	1
ENSG00000046889	PREX2	protein_coding	12058	1.29505	2.93983e-07	1.75975	0.000552646	1.54603	0.00027647	1.88187	0.00022137	1.6894	0.00111671	1.78884	0.000669039	2.10328	2.50312e-05	3.7716	0.00897	3.16625	0.00449752	1.5912	8.69972e-05	2.21316	0.0990666	1.93544	1
ENSG00000047056	WDR37	protein_coding	5656	-0.0335027	0.960507	0.687316	0.617085	0.371464	1	-0.0719418	0.954708	0.552734	0.731934	0.273945	1	0.680972	0.12667	1.03914	0.381924	0.871142	1	0.244447	0.588808	-0.577065	0.644944	-0.108608	1
ENSG00000047188	YTHDC2	protein_coding	10816	0.114241	0.791945	0.92322	0.293656	0.574706	1	0.0448861	0.949144	0.831277	0.367494	0.491012	1	0.0201028	0.968204	-0.223877	0.834883	-0.0967359	1	-0.214863	0.563668	-1.15068	0.198738	-0.608187	1
ENSG00000047230	CTPS2	protein_coding	5510	0.466013	0.359663	1.13565	0.334942	0.839339	1	0.167204	0.818059	1.65919	0.120906	1.09804	1	-0.0852061	0.93669	-0.138444	NA	-0.111579	1	0.388736	0.401846	0.755967	0.618989	0.584005	1
ENSG00000047249	ATP6V1H	protein_coding	5090	0.641708	0.126542	0.394087	0.727949	0.523204	1	0.90748	0.0701185	0.78906	0.314189	0.849484	1	0.595402	0.341218	-0.115299	0.947387	0.283379	1	1.11685	0.0107827	-0.278333	0.848876	0.58172	1
ENSG00000047315	POLR2B	protein_coding	5901	2.47021	3.20812e-22	2.7092	4.60354e-11	2.59465	2.30177e-11	2.67825	1.10128e-21	2.41886	8.90158e-12	2.55438	4.45079e-12	2.92636	3.42791e-33	1.56186	0.00825021	2.39976	0.00412511	2.9736	1.28223e-41	1.86191	0.00956195	2.52228	0.00478098
ENSG00000047346	FAM214A	protein_coding	9832	1.55419	1.65545e-06	1.72788	0.0139335	1.64365	0.00696757	0.60058	0.319211	0.901237	0.335388	0.758727	1	0.677052	0.0673612	1.30718	0.152933	1.02625	1	0.735149	0.0179114	2.27853	0.0507281	1.70407	1
ENSG00000047365	ARAP2	protein_coding	12428	1.35681	0.348137	0.923348	NA	1.1563	1	1.9903	0.555043	0.93846	NA	1.55819	1	2.31108	0.138185	2.93872	NA	2.65877	1	2.78392	0.0842991	0.909486	NA	2.13185	1
ENSG00000047410	TPR	protein_coding	12350	2.65386	2.86483e-32	2.02255	4.59893e-09	2.37246	2.29947e-09	2.43071	2.01503e-22	1.68787	6.19345e-09	2.10658	3.09673e-09	2.70141	2.62415e-48	0.123298	0.892289	1.92478	1	2.6721	2.51936e-53	0.517918	0.631651	1.96448	1
ENSG00000047457	CP	protein_coding	7296	0.234	NA	-2.02343	NA	-0.492013	1	-0.938758	NA	-2.3883	NA	-1.48866	1	0.418816	0.886947	-1.24446	NA	-0.185331	1	1.1292	NA	-1.81511	NA	0.305417	1
ENSG00000047578	KIAA0556	protein_coding	9784	2.60506	2.48605e-14	2.45954	0.00099882	2.53413	0.00049941	2.50077	5.21839e-07	1.50546	0.0300284	2.0873	0.0150145	2.48156	2.34261e-08	1.60211	0.146631	2.10784	1	2.49324	9.84745e-11	1.82314	0.117083	2.19675	1
ENSG00000047579	DTNBP1	protein_coding	3052	0.494841	0.63863	-0.0988555	NA	0.228319	1	1.47454	0.318411	0.518282	0.843411	1.07423	1	-0.371697	0.801544	0.785805	NA	0.320153	1	0.861456	0.339108	1.15714	NA	1.01686	1
ENSG00000047597	XK	protein_coding	5206	-1.09098	0.552373	1.1048	NA	0.38964	1	-3.20115	NA	-2.38654	NA	-2.73709	1	-0.97364	0.75964	0.00936729	NA	-0.399984	1	-2.95935	0.0716813	-1.25508	NA	-1.86896	1
ENSG00000047617	ANO2	protein_coding	6255	1.51472	0.127324	1.71658	NA	1.61918	1	1.86545	0.280103	3.29069	NA	2.74735	1	1.21249	0.552553	1.32983	NA	1.27235	1	1.39114	0.512263	0.927142	NA	1.17771	1
ENSG00000047621	C12orf4	protein_coding	4939	-1.17012	0.124895	-1.00564	NA	-1.08554	1	-1.64584	0.0849272	-2.47483	0.0263722	-2.00159	1	-0.321809	0.712128	1.36142	NA	0.752514	1	-0.956214	0.112076	0.493125	NA	-0.0567176	1
ENSG00000047634	SCML1	protein_coding	5497	-1.80501	0.00487492	-1.75777	0.184049	-1.7812	1	-0.942941	0.558678	-1.41878	NA	-1.16133	1	-1.67114	0.217668	-1.9782	NA	-1.81652	1	-1.22323	0.313701	0.452092	NA	-0.154936	1
ENSG00000047644	WWC3	protein_coding	7114	1.95647	7.11171e-11	1.99047	0.00252233	1.97357	0.00126117	2.29746	1.53518e-09	1.87946	0.00459184	2.10355	0.00229592	1.44767	0.00382983	1.17803	0.386392	1.31914	1	2.26072	8.60958e-14	2.91709	0.00291182	2.62592	0.00145591
ENSG00000047648	ARHGAP6	protein_coding	7885	0.0986956	0.964362	-1.04283	NA	-0.361993	1	0.40041	0.894353	0.192083	NA	0.300003	1	1.34919	0.627851	0.426545	NA	0.960399	1	1.02637	0.723352	-0.175351	NA	0.547176	1
ENSG00000047662	FAM184B	protein_coding	6622	1.34148	NA	-2.3181	NA	0.451349	1	1.50298	NA	0.619499	NA	1.12784	1	-1.7321	NA	-2.13936	NA	-1.92141	1	2.09299	NA	-2.06077	NA	1.17185	1
ENSG00000047849	MAP4	protein_coding	14943	1.84026	5.32368e-19	1.9212	3.15935e-08	1.8813	1.57968e-08	1.76461	1.13278e-11	1.496	3.58917e-05	1.63654	1.79459e-05	0.740421	0.00501074	0.849039	0.17334	0.795752	1	1.29876	1.51237e-07	1.52049	0.0213826	1.41388	0.0106914
ENSG00000047932	GOPC	protein_coding	4628	-1.71794	0.000135247	-1.29315	0.21265	-1.48997	1	-1.37498	0.00562693	-0.519991	0.646518	-0.885055	1	-1.14943	0.00591685	0.162154	0.931999	-0.349456	1	-1.07402	0.000763039	-0.136933	0.937669	-0.530693	1
ENSG00000047936	ROS1	protein_coding	7856	0.835448	NA	-3.0876	NA	-0.0724468	1	NA	NA	-3.32248	NA	0	1	0.569267	NA	-1.3011	NA	-0.0819301	1	-0.84818	NA	-4.30837	NA	-1.72271	1
ENSG00000048028	USP28	protein_coding	5719	0.788746	0.0345242	0.682196	0.471007	0.736455	1	0.654699	0.31058	0.978721	0.332496	0.825787	1	0.509726	0.498172	0.555774	0.775265	0.532934	1	0.473367	0.373452	0.243258	0.902187	0.362896	1
ENSG00000048052	HDAC9	protein_coding	16827	-0.444186	0.202789	0.231997	0.808811	-0.0668366	1	-0.648209	0.189965	-0.343536	0.693132	-0.487844	1	-0.554359	0.256508	0.493572	0.727699	0.0627339	1	-0.588519	0.00633779	-0.418466	0.676987	-0.500988	1
ENSG00000048140	TSPAN17	protein_coding	5215	0.89802	0.196379	-0.0429844	0.98003	0.502917	1	1.07971	0.187795	0.305396	0.842888	0.743889	1	0.174264	0.850144	-1.32856	0.288907	-0.389722	1	1.01254	0.0637684	-0.272896	0.865566	0.508487	1
ENSG00000048162	NOP16	protein_coding	2862	1.15688	0.400739	-1.57655	NA	0.358974	1	1.16576	0.585609	-1.28991	0.519801	0.407349	1	1.38261	0.444115	-0.705112	NA	0.687416	1	1.09343	0.499833	-0.0505406	NA	0.63198	1
ENSG00000048342	CC2D2A	protein_coding	7606	2.08908	1.51982e-07	1.75467	0.038934	1.93154	0.0194671	1.75028	0.00399223	0.015479	0.990504	1.1293	1	2.64199	8.06971e-08	0.598906	0.670412	1.9554	1	2.16066	2.31265e-07	1.27373	0.318277	1.78431	1
ENSG00000048392	RRM2B	protein_coding	5548	-1.46479	0.00467067	0.126553	0.952853	-0.460001	1	-1.09487	0.0370344	0.537233	0.717863	-0.0593698	1	-0.768225	0.297435	2.17295	NA	1.34953	1	-1.06863	0.012818	-0.582234	0.708	-0.805028	1
ENSG00000048405	ZNF800	protein_coding	5793	-0.347636	0.555893	0.202557	0.897658	-0.0464687	1	-0.557303	0.459226	-0.300969	0.827579	-0.42345	1	-0.0456596	0.949811	0.0335286	0.985739	-0.00552223	1	-0.266173	0.569062	-0.137695	0.931499	-0.200504	1
ENSG00000048462	TNFRSF17	protein_coding	1118	3.24669	NA	-2.18167	NA	2.27981	1	0.626914	NA	-3.99477	NA	-0.315644	1	2.87413	NA	-1.52964	NA	1.94073	1	1.79437	NA	-3.2153	NA	0.838472	1
ENSG00000048471	SNX29	protein_coding	11298	0.855658	0.158475	-0.308235	0.821423	0.388031	1	0.656772	0.486737	-0.625174	0.62503	0.153736	1	1.6656	0.00180371	-0.000719335	0.999466	1.06072	1	1.51447	0.000524659	1.88102	0.197094	1.70936	1
ENSG00000048540	LMO3	protein_coding	10268	-1.77341	7.49548e-05	-1.58618	0.0788839	-1.67676	1	-1.37561	0.0376672	-1.04545	0.30608	-1.2011	1	-1.91788	0.00116434	-0.803442	NA	-1.25563	1	-1.86315	2.61929e-06	-0.699315	0.705591	-1.16693	1
ENSG00000048544	MRPS10	protein_coding	2110	-1.67223	0.0109637	-0.831569	NA	-1.19151	1	-1.41696	0.0980292	0.595028	NA	-0.0854337	1	-1.31636	0.199977	2.94061	NA	2.01416	1	-1.86913	0.00899988	0.285885	NA	-0.421887	1
ENSG00000048545	GUCA1A	protein_coding	2341	-1.65895	NA	-2.64497	NA	-2.06931	1	-2.47962	NA	-0.621773	NA	-1.27027	1	-1.05178	NA	-2.05466	NA	-1.46778	1	-0.449327	0.89639	-1.96893	NA	-1.01767	1
ENSG00000048649	RSF1	protein_coding	15740	1.82176	9.33285e-19	1.05884	0.0118329	1.49015	0.00591644	1.55132	6.18537e-07	1.12747	0.000733691	1.35491	0.000367155	1.51926	1.14108e-16	0.473755	0.4501	1.08921	1	1.59732	2.03046e-22	1.15428	0.193112	1.39274	1
ENSG00000048707	VPS13D	protein_coding	20023	2.96843	1.46165e-38	3.01938	1.2042e-13	2.99413	6.02101e-14	2.31313	6.12151e-12	2.33567	2.05038e-07	2.32444	1.02522e-07	2.99875	2.22402e-45	1.02796	0.0473461	2.32657	0.023673	3.16153	5.33993e-64	1.60006	0.01341	2.58248	0.006705
ENSG00000048740	CELF2	protein_coding	10978	-1.36255	2.19084e-07	0.188905	0.849511	-0.387608	1	-1.25271	0.00297761	-0.795108	0.293556	-1.00584	1	-1.2702	1.56778e-09	2.09997	0.01122	1.23315	1	-1.06882	2.47171e-06	-0.172165	0.891326	-0.551925	1
ENSG00000048828	FAM120A	protein_coding	7204	0.266803	0.589894	1.00794	0.335609	0.684449	1	-0.0247651	0.977632	-0.125082	0.929089	-0.074052	1	0.508897	0.368696	0.987484	0.521731	0.767946	1	0.216255	0.651564	0.796836	0.616828	0.535556	1
ENSG00000048991	R3HDM1	protein_coding	7898	-0.719913	0.0662484	-0.0719861	0.952676	-0.359877	1	-1.10333	0.0570691	-0.617489	0.56974	-0.840054	1	-0.0544459	0.910112	-0.758263	0.334526	-0.363854	1	-0.37982	0.321961	-1.79621	0.0160984	-0.920758	1
ENSG00000049089	COL9A2	protein_coding	4151	0.454215	0.800698	0.477019	NA	0.465662	1	1.20879	0.549219	1.61845	NA	1.42811	1	1.25436	0.602147	-1.3847	NA	0.469145	1	1.29453	0.322041	-2.87399	0.0285635	0.372607	1
ENSG00000049130	KITLG	protein_coding	6030	-0.380196	0.760708	-0.466212	NA	-0.422563	1	-0.0737266	0.976821	-0.616353	NA	-0.319677	1	0.974216	0.708629	0.797387	NA	0.888509	1	-0.566688	0.654589	2.28895	NA	1.47565	1
ENSG00000049167	ERCC8	protein_coding	4847	-0.00643465	0.993918	1.75473	NA	1.12769	1	-0.897429	0.372173	-0.998535	0.554693	-0.947097	1	0.00465345	0.996658	2.34857	NA	1.60796	1	-0.123044	0.884018	0.663607	NA	0.323247	1
ENSG00000049192	ADAMTS6	protein_coding	8567	-1.36515	0.029576	-0.763501	0.656207	-1.03319	1	-1.08048	0.228214	-0.0965451	0.968123	-0.506208	1	-0.488326	0.768822	0.280179	NA	-0.0534955	1	-1.03443	0.295225	-1.69622	NA	-1.32771	1
ENSG00000049239	H6PD	protein_coding	9321	0.52223	0.144751	0.920997	0.24868	0.735347	1	1.54975	0.000124735	0.892383	0.143343	1.25819	1	0.0102556	0.989486	0.712251	0.668045	0.403536	1	0.481708	0.298953	0.795933	0.570017	0.647358	1
ENSG00000049245	VAMP3	protein_coding	2760	-1.94447	0.00139752	-1.83507	0.145719	-1.88873	1	-1.82009	0.0112076	-2.57631	0.00225723	-2.14921	1	-0.552789	0.549285	1.92224	NA	1.16086	1	-1.62139	0.00621972	-1.05843	NA	-1.31262	1
ENSG00000049246	PER3	protein_coding	8099	0.160342	0.847952	1.9208	NA	1.29393	1	-0.224846	0.831658	1.53316	0.405079	0.906846	1	0.875896	0.314972	1.20594	NA	1.05033	1	0.691396	0.311074	1.21129	NA	0.974639	1
ENSG00000049247	UTS2	protein_coding	1791	1.68758	NA	-1.47167	NA	0.840658	1	NA	NA	NA	NA	0	1	-0.726967	NA	-3.0458	NA	-1.46342	1	0.150624	NA	-3.1916	NA	-0.713706	1
ENSG00000049249	TNFRSF9	protein_coding	6331	-1.9227	NA	NA	NA	0	1	NA	NA	NA	NA	0	1	-2.03938	NA	-1.28656	NA	-1.61441	1	-2.78188	0.0433697	-0.696271	NA	-1.39106	1
ENSG00000049283	EPN3	protein_coding	4642	-1.39054	NA	-1.40845	NA	-1.39947	1	-0.820839	NA	-2.38871	NA	-1.40151	1	2.49401	NA	-0.0891718	NA	1.71666	1	-1.12746	NA	-3.54255	NA	-1.87954	1
ENSG00000049323	LTBP1	protein_coding	7329	1.11733	0.000191664	1.30828	0.113959	1.21596	1	1.90561	3.74662e-07	1.4279	0.000561248	1.68644	0.000280811	1.42582	0.00307529	2.0491	0.189102	1.77086	1	1.40667	0.000361805	2.84329	0.0114202	2.29687	0.00589099
ENSG00000049449	RCN1	protein_coding	7225	-1.0522	0.0239692	0.142588	0.927799	-0.334503	1	-0.77467	0.205828	-1.12814	0.180283	-0.940606	1	-0.809826	0.28998	2.06933	NA	1.25319	1	-0.497891	0.455412	0.309999	NA	-0.0381188	1
ENSG00000049540	ELN	protein_coding	6542	-1.26176	0.494849	-1.18885	NA	-1.22484	1	-0.768009	NA	-2.55392	NA	-1.40065	1	1.39454	NA	0.359569	NA	0.967942	1	1.81022	0.526873	0.790525	NA	1.38865	1
ENSG00000049541	RFC2	protein_coding	2211	-0.329965	0.678729	0.041172	0.983777	-0.132495	1	0.390151	0.757431	-0.313385	0.877394	0.0808495	1	0.378762	0.797782	1.93594	NA	1.35798	1	0.0218115	0.988233	-0.572059	NA	-0.24478	1
ENSG00000049618	ARID1B	protein_coding	44058	2.25542	4.88364e-27	1.95031	9.35926e-08	2.11091	4.67963e-08	2.12864	2.45732e-15	2.56685	1.77401e-13	2.36432	8.99294e-14	2.45555	2.01833e-40	2.1191	9.81766e-06	2.29711	4.90883e-06	2.45111	5.90501e-48	2.16892	0.000256305	2.3169	0.000128152
ENSG00000049656	CLPTM1L	protein_coding	6557	0.537988	0.341696	0.447488	0.7314	0.493447	1	1.75894	0.0020221	1.70876	0.0534754	1.73407	1	0.567372	0.424624	-0.350373	0.833288	0.180277	1	2.05086	3.59689e-06	2.04214	0.148321	2.04651	1
ENSG00000049759	NEDD4L	protein_coding	17455	2.06065	1.66238e-19	1.89385	3.75863e-05	1.97966	1.87931e-05	1.51391	4.79239e-05	2.21034	2.42427e-06	1.90375	2.51741e-05	1.90037	1.76061e-26	2.10459	3.7278e-06	2.00609	1.8639e-06	2.09361	8.00456e-41	2.16976	0.000432529	2.13219	0.000216264
ENSG00000049768	FOXP3	protein_coding	2647	0.835448	NA	-2.32466	NA	-0.0115634	1	NA	NA	-3.32248	NA	0	1	0.222819	NA	-1.3335	NA	-0.354929	1	1.32296	NA	-2.6687	NA	0.410914	1
ENSG00000049769	PPP1R3F	protein_coding	4173	0.261338	0.78419	-0.908576	0.53715	-0.208144	1	-0.0540438	0.968162	-0.262097	0.897971	-0.154323	1	0.667255	0.374694	0.636837	NA	0.652126	1	0.402502	0.55475	0.282519	0.898486	0.343758	1
ENSG00000049860	HEXB	protein_coding	5067	-0.203005	0.818726	-0.767499	0.607856	-0.457817	1	0.293719	0.815994	-0.491468	0.753792	-0.0461041	1	-0.735542	0.618028	-0.159442	NA	-0.418925	1	-0.668758	0.472092	-0.820386	NA	-0.742581	1
ENSG00000049883	PTCD2	protein_coding	12115	-1.99971	0.000389563	-2.46617	0.00925034	-2.21417	1	-2.07227	0.00574695	-0.350882	0.895125	-0.968762	1	-1.89462	0.0166912	0.379912	NA	-0.349046	1	-2.30529	0.000226262	-0.43938	NA	-1.08962	1
ENSG00000050030	NEXMIF	protein_coding	11757	1.58391	0.000369065	1.85711	0.0995741	1.72697	1	0.662596	0.442048	1.60247	0.327105	1.20776	1	1.63729	3.28339e-14	2.15277	0.00262132	1.91793	0.00131066	1.6296	4.51398e-14	2.38144	0.00309414	2.05395	0.00154707
ENSG00000050130	JKAMP	protein_coding	4350	-1.20202	0.0324408	-1.37791	0.206907	-1.28729	1	-0.397123	0.678537	-0.941654	0.360041	-0.643848	1	-1.08639	0.108567	-1.16969	NA	-1.12744	1	-0.591299	0.262509	-0.700913	0.637545	-0.645065	1
ENSG00000050165	DKK3	protein_coding	5059	-0.204555	0.874762	-1.32963	NA	-0.660091	1	0.0520911	0.981488	-0.863232	NA	-0.334165	1	-0.880275	0.397862	-0.874554	NA	-0.877411	1	0.0162363	0.981696	-0.728546	0.605178	-0.308618	1
ENSG00000050327	ARHGEF5	protein_coding	5818	1.0727	NA	-1.7628	NA	0.261861	1	-1.3286	NA	NA	NA	0	1	NA	NA	NA	NA	0	1	NA	NA	NA	NA	0	1
ENSG00000050344	NFE2L3	protein_coding	4249	0.68383	0.737449	1.85793	NA	1.38716	1	0.157998	NA	-0.575909	NA	-0.162782	1	1.6059	0.581859	0.52543	NA	1.16453	1	1.44537	0.691408	-2.47188	NA	0.537834	1
ENSG00000050393	MCUR1	protein_coding	6057	-2.13023	4.85569e-05	-1.29196	0.364864	-1.65105	1	-1.50554	0.0206019	-0.324471	0.867986	-0.797376	1	-1.07782	0.135211	0.0468153	NA	-0.408581	1	-1.26673	0.00773718	-1.80023	0.111831	-1.50896	1
ENSG00000050405	LIMA1	protein_coding	6317	1.02535	0.0622933	0.963342	0.491478	0.994681	1	1.17784	0.184885	-0.203372	0.892761	0.646573	1	-0.229717	0.809716	-0.303745	NA	-0.266257	1	0.501591	0.396303	1.38828	0.442521	1.01201	1
ENSG00000050426	LETMD1	protein_coding	6032	-1.24952	0.0271951	0.210681	NA	-0.342065	1	-1.38479	0.120056	0.812486	0.752973	0.0970578	1	-1.88826	0.00850332	0.943807	NA	0.133386	1	-1.39655	0.02554	-0.423178	NA	-0.829286	1
ENSG00000050438	SLC4A8	protein_coding	17980	0.392135	0.250766	1.25459	0.0497938	0.886874	1	0.863243	0.031407	0.593407	0.350995	0.734625	1	0.0734894	0.835076	0.422928	0.589363	0.258763	1	0.486489	0.0825362	1.40321	0.130047	1.01647	1
ENSG00000050555	LAMC3	protein_coding	7594	-0.350705	NA	-1.37783	NA	-0.774726	1	0.292777	NA	-0.286071	NA	0.0321917	1	1.40792	NA	-0.487418	NA	0.751395	1	NA	NA	NA	NA	0	1
ENSG00000050628	PTGER3	protein_coding	9653	2.67062	0.0905715	2.64389	NA	2.65732	1	-0.756385	0.828753	-2.40147	NA	-1.35614	1	-1.61957	0.0162517	0.649054	NA	-0.0788888	1	-0.650046	0.66469	1.06456	NA	0.448264	1
ENSG00000050730	TNIP3	protein_coding	3768	2.63259	NA	-0.888794	NA	1.75306	1	1.93998	NA	-2.79436	NA	0.993188	1	3.15465	NA	-3.75482	NA	2.1666	1	1.51975	NA	-2.03734	NA	0.637394	1
ENSG00000050748	MAPK9	protein_coding	8955	-1.32112	0.00641392	-0.767157	0.581105	-1.01771	1	-1.84223	0.00433776	-1.07597	0.455864	-1.40881	1	-0.93997	0.0134518	-0.0869573	0.952033	-0.451317	1	-0.912059	0.00466993	-0.755261	0.51086	-0.831531	1
ENSG00000050767	COL23A1	protein_coding	3586	-0.281523	NA	-0.223762	NA	-0.252353	1	-2.59544	0.203223	0.229963	NA	-0.579636	1	NA	NA	NA	NA	0	1	NA	NA	NA	NA	0	1
ENSG00000050820	BCAR1	protein_coding	9178	1.78387	7.48448e-07	2.06135	0.00538466	1.92927	0.00269271	2.41951	1.61858e-07	1.39225	0.0475961	1.99544	0.0237981	2.08331	4.08685e-09	2.15366	0.0543595	2.11891	1	2.43716	3.1815e-17	1.60788	0.0951368	2.0813	1
ENSG00000051009	FAM160A2	protein_coding	4736	0.183051	0.752912	0.502099	0.687841	0.351377	1	1.00088	0.12119	1.0296	0.312732	1.01531	1	1.09418	0.0221997	0.433188	0.760139	0.801215	1	1.04714	0.0125374	0.12579	0.937351	0.658797	1
ENSG00000051108	HERPUD1	protein_coding	5155	-0.0154313	0.987967	1.09535	NA	0.644321	1	0.0749219	0.916033	1.09753	0.203441	0.674998	1	0.405291	0.61561	0.845038	NA	0.641855	1	0.477761	0.430983	2.10837	NA	1.51213	1
ENSG00000051128	HOMER3	protein_coding	3422	0.586886	0.437931	-0.222253	0.901046	0.238314	1	-0.344716	0.78409	-0.152691	0.949824	-0.245511	1	0.546621	0.607742	1.19196	NA	0.905075	1	0.695682	0.399289	-1.12572	0.489024	0.0551435	1
ENSG00000051180	RAD51	protein_coding	3046	-0.317373	0.772348	0.55967	NA	0.186793	1	-0.613242	0.750801	-1.25774	NA	-0.899798	1	-0.907107	0.654233	0.554329	NA	0.00125351	1	-1.99788	0.291234	-1.1114	NA	-1.4876	1
ENSG00000051341	POLQ	protein_coding	9400	0.392504	0.334439	1.63785	0.0564036	1.14557	1	0.126301	0.888873	1.39339	0.309846	0.894699	1	0.394274	0.724456	1.67246	NA	1.17052	1	1.06126	0.0668716	2.80664	NA	2.18322	1
ENSG00000051382	PIK3CB	protein_coding	7850	1.49743	0.000136549	2.15737	0.015488	1.86481	0.00781228	1.50279	0.0226004	1.3589	0.256656	1.43264	1	1.9252	1.85414e-05	3.32649	0.0228544	2.78968	0.0114365	2.21867	1.89908e-07	2.7522	0.0673119	2.50996	1
ENSG00000051523	CYBA	protein_coding	3357	-0.768308	0.579406	-0.662092	NA	-0.714223	1	0.278385	0.894595	-0.949744	0.656119	-0.20876	1	-2.02154	0.311164	-1.37258	NA	-1.66087	1	-0.984598	0.498174	-0.129572	NA	-0.494649	1
ENSG00000051596	THOC3	protein_coding	3453	-2.74708	0.118901	-0.9628	NA	-1.59507	1	-1.4101	0.600169	0.481295	NA	-0.174392	1	-2.31569	0.440707	-0.907264	NA	-1.44603	1	-1.19961	0.541071	-0.281564	NA	-0.668764	1
ENSG00000051620	HEBP2	protein_coding	10356	-0.647061	0.407964	-1.22834	0.340063	-0.908623	1	-0.509007	0.668951	-1.07753	0.431123	-0.765442	1	-1.49122	0.26248	-2.64456	NA	-1.95558	1	-1.18568	0.133272	0.212382	NA	-0.323538	1
ENSG00000051825	MPHOSPH9	protein_coding	10304	-0.200984	0.621862	-0.0285423	0.97518	-0.112188	1	-0.996375	0.02917	-0.622041	0.47448	-0.797101	1	0.338101	0.424457	-0.546158	0.548694	-0.0373154	1	-0.134665	0.727053	-0.924156	0.367219	-0.476066	1
ENSG00000052126	PLEKHA5	protein_coding	12558	0.773537	0.00454238	0.732351	0.155421	0.753091	1	0.0902215	0.863415	0.397243	0.572602	0.251884	1	0.912671	0.00042412	-0.321864	0.678676	0.423612	1	0.539517	0.050208	-0.44321	0.653365	0.13026	1
ENSG00000052344	PRSS8	protein_coding	3010	0.0803107	NA	0.101333	NA	0.0908601	1	-0.738007	NA	-3.37544	NA	-1.52299	1	2.22796	NA	-0.510974	NA	1.42933	1	2.51479	NA	-0.236212	NA	1.7146	1
ENSG00000052723	SIKE1	protein_coding	5894	-2.37337	4.43458e-10	-1.32723	0.197879	-1.75748	1	-2.54176	8.49253e-10	-1.19941	0.243536	-1.71979	1	-2.20852	4.10923e-09	-0.63454	0.688163	-1.21675	1	-2.42792	1.88479e-15	-0.0396765	0.984432	-0.787485	1
ENSG00000052749	RRP12	protein_coding	8529	3.2283	1.6556e-13	2.90163	0.0055516	3.07419	0.0027758	3.29613	8.08849e-11	0.70171	0.339243	2.51718	1	2.23547	0.00033846	2.99443	NA	2.66429	1	2.92991	7.31285e-08	0.456842	0.797969	2.16883	1
ENSG00000052795	FNIP2	protein_coding	10868	1.71066	3.70194e-09	2.01568	0.00111443	1.87122	0.000557218	1.4851	0.00121704	1.57992	0.0452966	1.53329	0.0232568	1.68836	1.02696e-14	2.38508	0.000491452	2.07838	0.000245726	1.96827	3.05048e-20	3.18721	0.000100785	2.70282	5.03924e-05
ENSG00000052802	MSMO1	protein_coding	2892	-0.960757	0.00935173	-0.714855	0.412174	-0.832573	1	-0.965282	0.0593041	-0.60696	0.442362	-0.775025	1	-1.21821	0.000439936	-0.234791	0.876639	-0.644279	1	-0.927951	0.00135979	-0.900306	0.364094	-0.914062	1
ENSG00000052841	TTC17	protein_coding	11284	0.0994065	0.78641	0.289591	0.685624	0.19763	1	-0.0485091	0.933266	-0.220228	0.734799	-0.131815	1	0.204001	0.634845	0.0278181	0.982673	0.118597	1	0.453644	0.102776	-0.327028	0.763801	0.115481	1
ENSG00000052850	ALX4	protein_coding	5750	0.775337	NA	-2.30115	NA	-0.0630386	1	2.34273	NA	-1.76856	NA	1.42388	1	2.18182	NA	0.296726	NA	1.52747	1	0.921181	NA	-3.80614	NA	-0.0253584	1
ENSG00000053108	FSTL4	protein_coding	6734	0.19258	0.945101	0.00878966	NA	0.103609	1	1.19883	NA	-0.619642	NA	0.558934	1	0.309659	0.833032	1.78073	NA	1.2251	1	1.80574	0.546679	-0.467885	NA	1.07694	1
ENSG00000053254	FOXN3	protein_coding	11033	-1.78041	7.49919e-05	-0.778807	0.543169	-1.19438	1	-1.27378	0.0221299	-1.26257	0.155785	-1.26816	1	-1.4837	0.00043714	0.0479062	0.982673	-0.523532	1	-1.21975	0.00296158	-0.323795	0.861943	-0.703311	1
ENSG00000053328	METTL24	protein_coding	1774	-0.953414	NA	-2.32466	NA	-1.48191	1	-2.36756	NA	NA	NA	0	1	0.433073	NA	-1.3335	NA	-0.195194	1	0.428787	NA	-2.20133	NA	-0.355185	1
ENSG00000053371	AKR7A2	protein_coding	1781	-0.413687	0.680379	1.2349	NA	0.634292	1	0.672118	0.534056	0.0976203	0.963147	0.413279	1	-0.79212	0.589664	1.89897	NA	1.10667	1	0.272514	0.806907	-0.950655	NA	-0.213146	1
ENSG00000053372	MRTO4	protein_coding	2822	-0.67742	0.512054	-1.41653	NA	-1.00015	1	0.349185	0.820639	0.251919	0.928312	0.301372	1	-0.335125	0.805486	1.84871	NA	1.1357	1	-0.542572	0.65736	-1.00721	NA	-0.756264	1
ENSG00000053438	NNAT	protein_coding	1297	-1.54819	3.87994e-06	-1.37201	0.0564248	-1.45741	1	-0.703649	0.379288	-2.59309	4.59333e-08	-1.35892	1	-0.959491	0.0321891	-0.831474	0.453446	-0.894063	1	-0.756486	0.512263	-1.83481	0.028528	-1.19716	1
ENSG00000053501	USE1	protein_coding	2431	-0.556654	0.729312	1.07444	NA	0.478085	1	0.063323	0.983245	-2.27142	NA	-0.675771	1	-0.832655	0.637461	-0.848385	NA	-0.840498	1	-1.43866	0.246252	-0.986089	NA	-1.1947	1
ENSG00000053524	MCF2L2	protein_coding	20568	1.44114	0.0386499	1.2317	0.464966	1.34022	1	0.654043	0.559095	1.30251	0.516162	1.01441	1	1.84293	1.13304e-06	1.25268	0.245693	1.57779	1	1.59295	5.42789e-07	0.611284	0.583991	1.18405	1
ENSG00000053702	NRIP2	protein_coding	2803	-1.62449	NA	-3.18064	NA	-2.2022	1	-1.20683	NA	-1.4643	NA	-1.32983	1	1.48924	NA	-2.45148	NA	0.580256	1	0.9398	NA	-1.81579	NA	0.139019	1
ENSG00000053747	LAMA3	protein_coding	13522	0.199428	0.92409	-2.75853	NA	-0.625915	1	0.0951645	0.972807	-2.50719	0.168488	-0.684916	1	2.36548	0.175208	-1.22035	NA	1.48089	1	1.92092	0.523741	-2.19135	NA	1.00201	1
ENSG00000053770	AP5M1	protein_coding	13034	-1.00291	0.00895629	-0.0579602	0.965344	-0.454413	1	-1.9951	5.90479e-06	-1.69774	0.0239203	-1.83877	1	-1.14061	0.000507502	0.604438	0.632074	-0.018911	1	-1.64702	1.99774e-11	-0.15561	0.914022	-0.716609	1
ENSG00000053900	ANAPC4	protein_coding	7494	0.216851	0.691377	0.479233	0.687908	0.353999	1	-0.381203	0.574155	-0.00612473	0.996258	-0.181509	1	0.333775	0.648853	-0.0943509	0.958156	0.135535	1	-0.286486	0.59464	-0.430983	0.788333	-0.356926	1
ENSG00000053918	KCNQ1	protein_coding	3971	0.890339	NA	-3.32861	NA	-0.0341971	1	0.0124642	NA	-1.97855	NA	-0.663806	1	0.905684	NA	-0.842327	NA	0.281654	1	0.9398	NA	-3.9214	NA	-0.0113973	1
ENSG00000054116	TRAPPC3	protein_coding	3527	-0.966804	0.338804	-1.69657	NA	-1.28603	1	-0.971387	0.432121	-0.600419	NA	-0.774012	1	-0.800794	0.3718	2.39983	NA	1.54879	1	-1.28157	0.105285	0.175109	NA	-0.376697	1
ENSG00000054118	THRAP3	protein_coding	4736	1.91131	1.50796e-17	2.08621	9.49394e-07	2.00141	4.74697e-07	1.91537	1.01935e-10	1.76016	2.73708e-05	1.83985	1.36855e-05	1.93476	4.28102e-18	0.746222	0.286568	1.45957	1	2.19455	6.03945e-30	1.06469	0.148642	1.73751	1
ENSG00000054148	PHPT1	protein_coding	1612	0.558493	0.421017	-0.421978	0.778618	0.149994	1	1.07582	0.251391	-0.792054	0.458054	0.425159	1	1.02032	0.281329	-0.49292	NA	0.453627	1	0.929735	0.218551	-0.755506	0.67289	0.320349	1
ENSG00000054179	ENTPD2	protein_coding	2633	1.25988	NA	-4.9334	NA	0.279462	1	0.983448	NA	-1.87679	NA	0.169588	1	1.45133	NA	-2.48026	NA	0.542911	1	NA	NA	-3.54255	NA	0	1
ENSG00000054219	LY75	protein_coding	8798	-0.65462	NA	NA	NA	0	1	-2.06839	NA	NA	NA	0	1	NA	NA	NA	NA	0	1	NA	NA	NA	NA	0	1
ENSG00000054267	ARID4B	protein_coding	11073	1.23901	1.02443e-05	0.178901	0.80353	0.804211	1	0.774005	0.048835	0.649718	0.331831	0.7132	1	2.05637	2.73547e-20	-0.519716	0.426097	1.28003	1	1.71083	4.51141e-15	-0.149244	0.900985	1.06185	1
ENSG00000054277	OPN3	protein_coding	3716	-0.55723	0.761554	1.43265	NA	0.75661	1	0.581094	0.835759	1.27406	NA	0.96879	1	0.960867	0.768973	-0.63947	NA	0.372076	1	-0.17653	0.905487	1.58118	NA	0.95493	1
ENSG00000054282	SDCCAG8	protein_coding	5322	0.424331	0.622093	-0.265556	0.886382	0.120238	1	0.0578685	0.962669	-0.243005	0.897897	-0.0847392	1	-0.023745	0.979968	-0.375365	0.850552	-0.188869	1	-0.0851804	0.905507	-0.560534	0.74864	-0.303367	1
ENSG00000054356	PTPRN	protein_coding	8261	2.24629	0.0631836	-0.138568	NA	1.49903	1	0.728132	0.617848	-0.607588	0.782326	0.209632	1	0.765775	0.182548	-0.010065	0.995643	0.429392	1	1.41711	0.000434285	0.205576	0.877882	0.934951	1
ENSG00000054392	HHAT	protein_coding	6641	-1.19986	0.06694	-0.89268	0.571341	-1.03811	1	-1.43724	0.033589	0.0360747	0.988279	-0.520154	1	-2.21345	0.0864058	-0.855711	NA	-1.38043	1	-1.76584	0.0238847	0.295053	NA	-0.394993	1
ENSG00000054523	KIF1B	protein_coding	17720	2.42693	3.15729e-37	2.60154	1.10266e-19	2.51687	5.51332e-20	2.39138	1.81344e-30	2.31327	4.02436e-27	2.35285	2.01309e-27	2.70465	8.60867e-56	2.22044	9.98068e-07	2.48276	4.99034e-07	2.89878	1.17989e-78	2.63795	7.71407e-07	2.77425	3.85703e-07
ENSG00000054598	FOXC1	protein_coding	3926	0.985141	0.702945	-2.20016	NA	0.135614	1	-0.540538	NA	-0.730004	NA	-0.632163	1	2.04371	0.402908	-0.217863	NA	1.31698	1	-2.20598	NA	-3.43367	NA	-2.693	1
ENSG00000054611	TBC1D22A	protein_coding	5315	-0.251191	0.771741	0.455542	NA	0.145026	1	0.0159269	0.989945	-1.26736	0.158682	-0.487499	1	0.930407	0.238307	2.91761	NA	2.24211	1	0.843169	0.166459	1.10745	NA	0.981353	1
ENSG00000054654	SYNE2	protein_coding	31374	3.71694	1.90953e-93	2.4237	5.97347e-27	3.21062	2.98674e-27	3.24379	1.98013e-42	2.3821	1.33394e-27	2.87635	6.66972e-28	3.5973	1.44259e-54	1.10994	0.0754735	2.83404	1	3.81597	9.84548e-141	2.16168	0.00100536	3.21399	0.000502681
ENSG00000054690	PLEKHH1	protein_coding	10817	1.3588	0.000274625	1.56305	0.074334	1.46453	1	0.603433	0.329596	0.193713	0.879941	0.413069	1	-0.144075	0.825261	0.00758237	0.996488	-0.0662543	1	0.741743	0.0396375	1.35669	0.323276	1.08174	1
ENSG00000054793	ATP9A	protein_coding	8317	1.50489	1.74457e-11	1.57752	0.000986738	1.54166	0.000493369	1.35527	0.000132394	1.81911	3.1671e-05	1.60575	8.20325e-05	1.3995	8.2016e-14	1.8764	0.000728388	1.65756	0.000364194	1.72179	3.46524e-14	1.89954	0.00499434	1.8134	0.00249717
ENSG00000054796	SPO11	protein_coding	1867	NA	NA	-3.15827	NA	0	1	0.685913	NA	-1.87921	NA	-0.0888436	1	-0.349544	NA	-3.0458	NA	-1.14254	1	NA	NA	NA	NA	0	1
ENSG00000054803	CBLN4	protein_coding	3024	1.68758	NA	-4.25062	NA	0.710923	1	1.65539	NA	-1.24721	NA	0.836468	1	1.48924	NA	-4.38686	NA	0.513594	1	1.79437	NA	-1.81511	NA	0.907976	1
ENSG00000054938	CHRDL2	protein_coding	3135	-0.0875248	NA	NA	NA	0	1	NA	NA	NA	NA	0	1	1.17641	NA	-0.510974	NA	0.566517	1	NA	NA	-3.60387	NA	0	1
ENSG00000054965	FAM168A	protein_coding	7887	-1.82007	2.20886e-08	-0.78251	0.386182	-1.20996	1	-1.87338	2.68704e-06	-0.723404	0.430724	-1.18672	1	-1.0285	0.000316955	0.846929	0.414649	0.194647	1	-1.30923	7.40515e-05	1.0717	0.385842	0.325067	1
ENSG00000054967	RELT	protein_coding	6322	-1.28804	0.231558	-0.165545	NA	-0.620269	1	-0.383847	0.801075	1.33682	NA	0.719107	1	-0.604795	0.643171	2.76316	NA	1.89654	1	-0.559525	0.658596	0.578046	NA	0.118593	1
ENSG00000054983	GALC	protein_coding	6825	-0.405515	0.4512	-0.0699188	0.964829	-0.227981	1	0.371099	0.632453	1.11338	0.307064	0.789464	1	-0.174826	0.844077	1.31527	NA	0.754616	1	0.335669	0.457341	0.0726917	0.964728	0.210164	1
ENSG00000055044	NOP58	protein_coding	3299	0.531783	0.243014	-0.502897	0.581919	0.105278	1	0.0513225	0.957223	-0.887773	0.262502	-0.343127	1	0.421965	0.490425	-1.33017	0.132845	-0.203011	1	0.316337	0.544613	-0.592386	0.680533	-0.0676287	1
ENSG00000055070	SZRD1	protein_coding	4747	-0.947568	0.0455365	-0.748429	0.507826	-0.844566	1	-1.18902	0.059964	-0.0247764	0.990327	-0.492512	1	-0.924001	0.0924709	0.984446	NA	0.325155	1	-0.72133	0.0927904	-0.510153	0.73937	-0.611881	1
ENSG00000055118	KCNH2	protein_coding	5877	2.93881	2.13423e-08	1.52837	0.180121	2.3995	1	2.56915	1.65566e-07	1.19587	0.119314	2.04009	1	1.91994	4.95708e-07	1.28349	0.223167	1.63653	1	2.31106	2.45016e-10	0.808179	0.414239	1.74706	1
ENSG00000055130	CUL1	protein_coding	3548	2.14845	2.57553e-14	1.69241	0.00153809	1.93838	0.000769044	1.99212	5.1483e-07	1.95025	0.00322302	1.97134	0.00161177	2.10363	7.64001e-13	1.50795	0.0521211	1.83632	1	2.32236	7.99558e-17	0.240165	0.821078	1.62822	1
ENSG00000055147	FAM114A2	protein_coding	6543	-0.351392	0.629139	0.795932	0.666545	0.333439	1	-1.0472	0.204296	-0.301695	0.882546	-0.62682	1	-1.17038	0.097624	0.237287	NA	-0.301266	1	-1.31815	0.0101129	1.94018	NA	1.08358	1
ENSG00000055163	CYFIP2	protein_coding	10498	2.69858	1.69871e-38	2.17603	6.24036e-08	2.46084	3.12018e-08	2.69833	2.15732e-20	2.56159	1.27345e-11	2.63158	6.36727e-12	2.67262	4.93991e-36	2.26104	1.20601e-05	2.48146	6.03007e-06	2.83276	1.32059e-52	2.04735	0.00140602	2.49285	0.000703008
ENSG00000055208	TAB2	protein_coding	6010	-0.0179044	0.968735	0.620049	0.443732	0.336051	1	0.0958395	0.884348	-0.337417	0.659461	-0.104585	1	0.236481	0.565009	0.0541643	0.963226	0.148201	1	0.154764	0.673733	0.958238	0.338649	0.611727	1
ENSG00000055211	GINM1	protein_coding	2248	-1.52015	0.0179256	-1.46144	0.273701	-1.4905	1	-0.550114	0.592503	0.663445	0.73607	0.180674	1	-0.558845	0.472021	-0.233372	NA	-0.38695	1	-0.686465	0.329647	0.131873	NA	-0.220034	1
ENSG00000055332	EIF2AK2	protein_coding	10753	-1.00238	0.00244232	-0.600819	0.471007	-0.787674	1	-0.456932	0.416319	-0.00795318	0.995586	-0.215047	1	-0.784058	0.128766	0.77065	NA	0.193311	1	-0.657109	0.0435125	1.34196	0.332936	0.664071	1
ENSG00000055483	USP36	protein_coding	9235	0.514389	0.246367	0.866519	0.389814	0.701171	1	0.561805	0.273224	0.175688	0.848219	0.381626	1	0.264306	0.653137	0.0796741	0.959462	0.174942	1	0.162717	0.73437	-0.126035	0.937669	0.0255534	1
ENSG00000055609	KMT2C	protein_coding	20114	1.8279	9.7349e-21	1.96455	7.59684e-09	1.89784	3.79842e-09	1.28475	3.08345e-06	0.955424	0.00208836	1.12947	0.00104572	2.05708	1.58328e-32	0.764648	0.170239	1.551	1	2.01177	9.43953e-37	0.869269	0.259506	1.55078	1
ENSG00000055732	MCOLN3	protein_coding	6623	-0.76641	0.810501	-0.989894	NA	-0.873829	1	-2.65157	NA	-3.32248	NA	-2.94837	1	-0.907208	NA	-1.69945	NA	-1.24962	1	-0.384464	NA	-2.44148	NA	-1.07376	1
ENSG00000055813	CCDC85A	protein_coding	3982	1.61885	0.455222	1.45287	NA	1.53824	1	-0.486597	NA	-1.52119	NA	-0.913073	1	1.15507	0.316125	-1.5472	NA	0.361276	1	2.4789	0.237506	-1.62481	NA	1.56047	1
ENSG00000055917	PUM2	protein_coding	6978	0.0356402	0.920636	0.920003	0.0768159	0.54455	1	0.477667	0.144799	1.33891	0.00254039	0.971626	1	0.521357	0.0286351	2.13892	0.000576526	1.54588	0.0146058	0.659127	0.00078204	1.03058	0.166438	0.856776	1
ENSG00000055950	MRPL43	protein_coding	3573	-0.256155	0.798158	-0.971975	0.5457	-0.570117	1	-0.354288	0.814616	-0.804734	0.698577	-0.562002	1	-1.11499	0.289609	-0.728275	NA	-0.908714	1	-0.760334	0.359384	-2.09525	0.137485	-1.27861	1
ENSG00000055955	ITIH4	protein_coding	5462	-0.06512	NA	NA	NA	0	1	NA	NA	-3.63598	NA	0	1	-0.319659	NA	NA	NA	0	1	0.0951944	NA	-1.81579	NA	-0.564629	1
ENSG00000055957	ITIH1	protein_coding	4544	NA	NA	NA	NA	0	1	1.56198	NA	-0.286071	NA	0.915608	1	NA	NA	NA	NA	0	1	0.152588	NA	-2.40882	NA	-0.62163	1
ENSG00000056050	HPF1	protein_coding	1436	0.39967	0.642871	-0.24433	0.896758	0.113309	1	0.519767	0.679075	0.949868	0.649571	0.750786	1	1.36206	0.236758	0.147629	NA	0.879029	1	0.802357	0.491114	-0.43401	NA	0.312752	1
ENSG00000056097	ZFR	protein_coding	6792	1.90674	1.72196e-16	2.03182	1.65812e-07	1.97063	8.29058e-08	1.94265	1.80378e-13	2.39089	3.60672e-10	2.18411	1.80426e-10	2.05654	2.83834e-18	1.51558	0.00681319	1.81127	0.0034066	2.20804	6.05888e-34	2.25837	0.00124271	2.23342	0.000621353
ENSG00000056277	ZNF280C	protein_coding	4634	-1.20025	0.000984567	-0.558932	0.568836	-0.844245	1	-0.879537	0.0969812	0.467982	0.725324	-0.0538567	1	-1.11945	0.0288811	0.417269	NA	-0.15548	1	-1.4466	0.000171992	-0.488201	0.792401	-0.889238	1
ENSG00000056291	NPFFR2	protein_coding	2359	-0.0875248	NA	NA	NA	0	1	NA	NA	NA	NA	0	1	-0.287473	NA	NA	NA	0	1	1.57866	0.576615	0.479404	NA	1.13129	1
ENSG00000056487	PHF21B	protein_coding	5753	0.00488832	0.993752	0.559938	0.6101	0.308943	1	-0.277393	0.721763	-1.47148	0.0410062	-0.754271	1	0.534314	0.180785	-0.262882	0.813386	0.190093	1	0.952787	0.00113605	0.315854	0.783713	0.669188	1
ENSG00000056558	TRAF1	protein_coding	6449	-2.32446	0.195244	-1.48497	NA	-1.8445	1	-2.04314	0.193668	-1.31179	NA	-1.63161	1	0.632078	0.851797	-0.85548	NA	0.0720905	1	-1.91394	0.149538	0.171089	NA	-0.523592	1
ENSG00000056586	RC3H2	protein_coding	11545	-0.370748	0.259471	0.317071	0.638365	0.0137697	1	-0.743372	0.0264807	-0.339706	0.568498	-0.527466	1	0.485614	0.0502578	1.45307	0.0183844	1.04896	1	0.274886	0.209195	0.947517	0.221617	0.650052	1
ENSG00000056736	IL17RB	protein_coding	3038	0.495905	NA	-0.624121	NA	0.0419579	1	-1.02264	NA	-1.53274	NA	-1.25526	1	1.12454	NA	-0.487418	NA	0.532878	1	-0.84818	NA	NA	NA	0	1
ENSG00000056972	TRAF3IP2	protein_coding	6553	0.616184	0.741527	2.0551	NA	1.50806	1	-0.981013	0.712567	-1.33249	NA	-1.14608	1	0.692856	NA	0.233736	NA	0.481483	1	1.20069	0.675376	-1.42733	NA	0.417011	1
ENSG00000056998	GYG2	protein_coding	3655	-0.474403	0.508784	0.236312	0.906801	-0.0757157	1	-0.337858	0.722486	0.767701	0.672841	0.318328	1	-0.332285	0.795826	1.84408	NA	1.13242	1	-0.0512905	0.94875	0.856887	NA	0.473111	1
ENSG00000057019	DCBLD2	protein_coding	11274	0.0705983	0.836883	0.185273	0.772342	0.129075	1	0.51303	0.155325	0.597253	0.231961	0.555756	1	0.0338289	0.930544	1.77538	0.00709619	1.15284	1	0.401628	0.141741	1.53508	0.0479769	1.07691	1
ENSG00000057149	SERPINB3	protein_coding	1777	1.68758	NA	-4.15029	NA	0.712589	1	1.77849	NA	-3.33655	NA	0.819532	1	NA	NA	-3.0458	NA	0	1	0.9398	NA	-2.83748	NA	0.0413603	1
ENSG00000057252	SOAT1	protein_coding	7005	-1.99647	5.3782e-05	-0.177182	0.933158	-0.817255	1	-1.57138	0.00280793	-0.215571	0.904551	-0.739744	1	-1.52446	0.0242564	1.15731	NA	0.366262	1	-1.36379	0.00836246	0.739138	NA	0.0410593	1
ENSG00000057294	PKP2	protein_coding	7043	1.26911	0.0870943	3.61007	NA	2.86995	1	1.78429	0.0311632	3.3802	0.0305576	2.79251	0.0308604	1.26528	0.354343	2.79119	NA	2.22122	1	2.09191	0.0241872	4.26805	NA	3.55643	1
ENSG00000057468	MSH4	protein_coding	3266	-0.801293	NA	-1.47167	NA	-1.09789	1	-2.38584	NA	-1.4401	NA	-1.83682	1	-2.88168	NA	-4.33779	NA	-3.43334	1	-3.67965	NA	NA	NA	0	1
ENSG00000057593	F7	protein_coding	3795	-0.549056	NA	NA	NA	0	1	-0.477408	NA	-0.919396	NA	-0.681542	1	-1.46574	NA	NA	NA	0	1	0.670054	NA	-1.00336	NA	0.0634816	1
ENSG00000057608	GDI2	protein_coding	4033	0.815453	0.00215299	0.952551	0.0519959	0.88563	1	1.23881	0.0226411	0.612491	0.289535	0.959372	1	0.540084	0.127624	1.01456	0.287026	0.796742	1	1.08809	6.00443e-06	0.495742	0.605337	0.822109	1
ENSG00000057657	PRDM1	protein_coding	6369	-0.703619	0.764864	-0.155804	NA	-0.403864	1	1.41826	0.589185	-0.488483	NA	0.759328	1	0.212282	NA	-3.06812	NA	-0.64639	1	-0.604609	0.827716	-0.918003	NA	-0.752813	1
ENSG00000057663	ATG5	protein_coding	5517	-1.30926	0.0580001	-0.947149	NA	-1.11687	1	-0.878654	0.350009	-0.0096004	0.996269	-0.379656	1	-0.316665	0.775454	-1.35745	NA	-0.745171	1	-1.21842	0.0858405	0.311883	NA	-0.25922	1
ENSG00000057704	TMCC3	protein_coding	6515	0.282532	0.809191	0.680872	NA	0.495407	1	-0.141846	0.947705	1.15226	NA	0.645694	1	0.372221	0.827193	2.6991	NA	1.96131	1	1.19724	0.316248	1.15071	NA	1.17416	1
ENSG00000057757	PITHD1	protein_coding	2186	-1.69227	0.0115205	-1.11173	NA	-1.37299	1	-0.75258	0.402519	-0.557082	0.755649	-0.651522	1	-0.785436	0.348512	-0.0712312	NA	-0.384582	1	-0.26979	0.682826	1.52903	NA	0.893498	1
ENSG00000057935	MTA3	protein_coding	10580	0.789936	0.0247744	1.1921	0.125997	1.00499	1	0.843384	0.0977584	0.929568	0.268457	0.887119	1	0.826127	0.0860512	0.56356	0.700335	0.700809	1	1.063	0.00255783	1.17627	0.347252	1.12075	1
ENSG00000058056	USP13	protein_coding	8440	0.0974804	0.834497	0.0666102	0.948537	0.0821279	1	0.786237	0.162285	0.773731	0.42062	0.779997	1	0.364865	0.501254	0.332874	0.84207	0.348958	1	0.387856	0.354891	1.53385	0.258985	1.07177	1
ENSG00000058063	ATP11B	protein_coding	9196	0.216164	0.60148	0.797606	0.267109	0.535981	1	0.272041	0.628782	0.980394	0.13828	0.669262	1	0.400662	0.35649	1.75098	0.126478	1.22835	1	0.375055	0.284876	1.548	0.112882	1.07759	1
ENSG00000058085	LAMC2	protein_coding	6543	2.30229	0.417879	-0.77585	NA	1.46374	1	-0.421978	NA	-1.74801	NA	-0.937722	1	2.05232	NA	0.251953	NA	1.41645	1	2.09973	NA	-0.659988	NA	1.29842	1
ENSG00000058091	CDK14	protein_coding	6841	-0.20974	0.645217	0.100131	0.922802	-0.0465011	1	0.359234	0.580353	0.640992	0.539457	0.50698	1	0.565674	0.190192	1.50272	0.186338	1.10897	1	0.724953	0.0645413	2.00765	0.127775	1.50439	1
ENSG00000058262	SEC61A1	protein_coding	4697	-0.152257	0.759764	-0.556917	0.523553	-0.340445	1	-0.244822	0.651346	-0.0418307	0.968184	-0.139759	1	0.184975	0.75228	0.0884207	0.952683	0.137505	1	0.22179	0.610315	1.46629	0.295542	0.974266	1
ENSG00000058272	PPP1R12A	protein_coding	11815	0.838213	0.00119504	0.231472	0.724331	0.566507	1	1.13209	0.000778691	0.934123	0.0520985	1.0365	1	0.872382	0.000455477	-0.261086	0.746161	0.414212	1	1.16605	6.62051e-09	0.751233	0.472826	0.973501	1
ENSG00000058335	RASGRF1	protein_coding	9929	2.26693	0.419513	-2.49287	NA	1.31922	1	-0.268131	0.961105	-2.39477	NA	-0.970657	1	2.03147	4.38391e-05	0.638724	0.743124	1.49701	1	1.32651	0.490816	-1.08333	NA	0.575256	1
ENSG00000058404	CAMK2B	protein_coding	8159	0.0324304	0.989431	-3.18873	NA	-0.820609	1	1.32043	0.506468	-1.79353	0.281429	0.478132	1	0.198815	0.781019	-1.0814	0.328862	-0.303716	1	0.207642	0.772912	-0.979804	0.518203	-0.267212	1
ENSG00000058453	CROCC	protein_coding	8871	2.21355	4.07419e-12	1.5496	0.0196237	1.91944	0.00981184	1.88723	8.50562e-05	0.183052	0.844337	1.27338	1	1.20317	0.0224605	-0.291219	0.832519	0.641391	1	1.20696	0.00467897	1.02888	0.490477	1.12067	1
ENSG00000058600	POLR3E	protein_coding	9488	0.931571	0.0843893	-0.158337	0.912066	0.487182	1	0.346415	0.642846	0.99378	0.356322	0.706107	1	0.398507	0.642885	-1.38375	0.259386	-0.233308	1	0.239863	0.709384	-0.63492	0.677751	-0.132217	1
ENSG00000058668	ATP2B4	protein_coding	9721	1.67202	1.90845e-12	1.85464	0.000285719	1.76622	0.000142859	1.63787	1.10455e-06	0.84439	0.0680176	1.29501	1	1.08069	0.0346376	1.67614	0.188499	1.40892	1	1.49401	3.40164e-07	2.44382	0.0121748	2.0457	0.00608759
ENSG00000058673	ZC3H11A	protein_coding	12798	NA	NA	NA	NA	0	1	NA	NA	NA	NA	0	1	NA	NA	NA	NA	0	1	NA	NA	NA	NA	0	1
ENSG00000058729	RIOK2	protein_coding	5502	0.284501	0.657025	-0.358226	0.80353	-0.00136199	1	1.09687	0.0983679	1.18849	0.32644	1.14341	1	0.103889	0.908954	-0.504928	0.775644	-0.16864	1	0.661865	0.244174	0.243935	0.900677	0.467981	1
ENSG00000058799	YIPF1	protein_coding	2072	-0.347895	0.717306	0.186989	NA	-0.055805	1	0.775761	0.56073	2.12356	0.348585	1.60165	1	0.701921	0.579803	1.91149	NA	1.42993	1	0.933202	0.267563	0.807054	NA	0.871506	1
ENSG00000058804	NDC1	protein_coding	5135	-0.70694	0.0789835	0.249775	0.834214	-0.150689	1	-0.356997	0.657722	0.0364179	0.981697	-0.14692	1	-0.69059	0.379835	1.33297	NA	0.650218	1	-0.503905	0.410524	1.91014	NA	1.15822	1
ENSG00000058866	DGKG	protein_coding	10978	-0.0875248	NA	NA	NA	0	1	NA	NA	NA	NA	0	1	-1.13048	NA	NA	NA	0	1	0.9398	NA	-2.65175	NA	0.0547717	1
ENSG00000059122	FLYWCH1	protein_coding	8419	1.66968	0.00706075	0.55892	0.701095	1.21866	1	1.81271	0.0141257	0.797025	0.542301	1.39247	1	1.69262	0.00400724	1.81788	NA	1.75661	1	1.44526	0.00217327	1.59882	0.285296	1.52408	1
ENSG00000059145	UNKL	protein_coding	7494	-0.116483	0.873917	0.180459	0.915081	0.0396142	1	-0.413656	0.658624	-1.42842	0.133648	-0.833599	1	0.290172	0.655588	0.723662	0.676789	0.523138	1	0.447791	0.338715	-0.0329733	0.984876	0.227343	1
ENSG00000059377	TBXAS1	protein_coding	6200	-0.545992	0.769123	-0.647882	NA	-0.596038	1	-0.302309	0.941273	-0.341276	NA	-0.321661	1	-1.32024	0.650954	-0.986564	NA	-1.14378	1	-1.74266	0.365994	-2.32662	NA	-2.00529	1
ENSG00000059378	PARP12	protein_coding	6285	1.99148	0.37233	1.74254	NA	1.87237	1	-0.747956	0.797162	0.753616	NA	0.189957	1	-1.37335	NA	-1.26744	NA	-1.31942	1	-1.32525	NA	-0.902574	NA	-1.09849	1
ENSG00000059573	ALDH18A1	protein_coding	3766	1.67582	3.90412e-08	1.03217	0.178607	1.3896	1	2.06096	1.58934e-09	2.6997	2.2304e-07	2.4154	1.12314e-07	1.47134	0.00155532	0.314936	0.819596	1.00603	1	2.02916	1.73079e-08	1.26719	0.252444	1.6979	1
ENSG00000059588	TARBP1	protein_coding	7743	-0.384601	0.446432	-0.585042	0.556225	-0.481343	1	-0.388177	0.61192	0.0623177	0.968871	-0.145417	1	-0.119714	0.831804	-1.81215	0.00639396	-0.730804	1	-0.846011	0.0346933	-2.13948	0.0122108	-1.3524	1
ENSG00000059691	GATB	protein_coding	11757	0.851046	0.382362	2.93663	NA	2.24185	1	1.34581	0.228801	0.985605	0.61605	1.17692	1	1.3251	0.27324	2.06827	NA	1.74401	1	1.64227	0.0873481	2.88487	NA	2.39341	1
ENSG00000059728	MXD1	protein_coding	6351	-1.87717	0.00243185	1.51655	NA	0.647672	1	-1.49064	0.0124854	0.584804	0.764791	-0.108045	1	-1.76023	4.86237e-05	-0.288278	NA	-0.844146	1	-2.03699	2.67397e-06	-1.01061	0.542057	-1.43438	1
ENSG00000059758	CDK17	protein_coding	6547	0.128463	0.780757	0.0960144	0.928492	0.11233	1	0.279044	0.634034	0.669579	0.455439	0.487486	1	0.151503	0.733242	0.128056	0.912449	0.139827	1	0.296537	0.340139	1.2606	0.21259	0.857644	1
ENSG00000059769	DNAJC25	protein_coding	2586	-0.895137	0.42811	-0.831525	NA	-0.862981	1	-0.961636	0.418298	-1.04319	0.596395	-1.00183	1	0.95395	0.444713	-0.829141	NA	0.321947	1	-1.28021	0.25338	-2.75108	NA	-1.83579	1
ENSG00000059804	SLC2A3	protein_coding	6159	-1.53621	0.000392488	-0.090198	0.957719	-0.639148	1	-0.600246	0.42619	0.0680618	0.965648	-0.227735	1	-0.794596	0.207455	0.107307	NA	-0.274285	1	-1.41778	0.000954506	-0.681373	0.69627	-1.00309	1
ENSG00000059915	PSD	protein_coding	6338	1.29968	0.0858119	-0.308239	0.82546	0.709012	1	0.836252	0.267513	0.44105	0.751463	0.652141	1	1.70546	1.69816e-09	0.212341	0.844285	1.14401	1	1.69277	6.9789e-08	0.660349	0.480602	1.267	1
ENSG00000060069	CTDP1	protein_coding	7415	1.6959	0.000945499	1.23507	0.312596	1.48381	1	2.60441	7.93425e-06	1.02784	0.286616	2.02155	1	2.13795	0.00037788	1.44482	0.369697	1.83262	1	2.36157	1.84954e-06	2.3397	0.115228	2.35068	1
ENSG00000060138	YBX3	protein_coding	8610	-0.648147	0.268227	-0.892682	0.471895	-0.76524	1	0.203978	0.820834	-0.793517	0.391709	-0.210224	1	-0.111842	0.925059	1.53698	NA	0.936315	1	0.192532	0.832804	0.842813	NA	0.554005	1
ENSG00000060140	STYK1	protein_coding	3424	-0.0262819	NA	-4.02864	NA	-0.938957	1	0.641485	NA	-2.01846	NA	-0.146598	1	-0.287473	NA	NA	NA	0	1	0.0475709	NA	-1.81579	NA	-0.602117	1
ENSG00000060237	WNK1	protein_coding	14370	1.916	3.12649e-20	1.60729	1.89378e-08	1.76989	9.46892e-09	1.7794	1.52188e-14	1.79235	1.96768e-11	1.78589	9.84601e-12	2.17404	6.40478e-37	2.08298	4.3666e-06	2.12923	2.1833e-06	2.38834	3.1307e-51	1.87029	0.00120887	2.15245	0.000604435
ENSG00000060303	RPS17P5	processed_pseudogene	408	NA	NA	NA	NA	0	1	-0.542002	NA	-2.21864	NA	-1.14934	1	-0.349544	NA	NA	NA	0	1	NA	NA	NA	NA	0	1
ENSG00000060339	CCAR1	protein_coding	6059	1.09022	5.35262e-06	-0.0891639	0.890543	0.617833	1	0.89105	0.00580964	0.508275	0.349659	0.71232	1	1.48004	4.80828e-11	-0.72528	0.199381	0.763173	1	1.01576	6.73255e-06	-0.118658	0.934369	0.557294	1
ENSG00000060491	OGFR	protein_coding	4702	1.68097	0.00331372	0.423087	0.757311	1.18498	1	1.27778	0.055688	0.180156	0.8935	0.830927	1	1.17206	0.0506206	0.297571	0.874839	0.800083	1	1.4776	0.00222194	1.4282	0.391246	1.45311	1
ENSG00000060558	GNA15	protein_coding	2613	2.51516	NA	-2.64293	NA	1.55501	1	-1.05125	NA	-2.37217	NA	-1.56554	1	2.2697	NA	-2.39938	NA	1.32532	1	0.992856	NA	-3.0788	NA	0.0762005	1
ENSG00000060566	CREB3L3	protein_coding	2678	2.06731	NA	-1.10984	NA	1.21859	1	1.77849	NA	-2.39027	NA	0.856556	1	0.530977	NA	-2.45353	NA	-0.297368	1	NA	NA	NA	NA	0	1
ENSG00000060642	PIGV	protein_coding	3382	-0.474146	0.66561	0.100989	NA	-0.158106	1	0.0431512	0.979322	0.787421	0.771109	0.462758	1	-0.111948	0.958884	-0.941185	NA	-0.46779	1	-0.318076	0.795757	-0.396157	NA	-0.356588	1
ENSG00000060656	PTPRU	protein_coding	6682	2.38304	4.6558e-13	1.5752	0.0252318	2.03494	0.0126159	2.89958	1.62467e-10	2.01838	0.00108209	2.52524	0.000541044	2.29369	3.96245e-09	2.43911	0.0243084	2.36823	0.0121542	2.78862	1.30672e-14	1.47374	0.182896	2.27606	1
ENSG00000060688	SNRNP40	protein_coding	3881	-0.251918	0.691477	0.0484073	0.975509	-0.0939544	1	0.151745	0.884909	-0.0192245	0.991081	0.0687912	1	-1.15715	0.222803	-1.3747	NA	-1.26183	1	-0.499939	0.466937	0.446631	NA	0.0496242	1
ENSG00000060709	RIMBP2	protein_coding	8536	1.35751	0.0278315	-0.160461	0.91336	0.789592	1	1.28492	0.309498	-0.568851	0.749297	0.637307	1	0.35463	0.487334	0.329633	0.819264	0.342186	1	0.447088	0.447001	0.0268433	0.988395	0.252214	1
ENSG00000060718	COL11A1	protein_coding	8512	1.14993	3.85535e-05	0.42902	0.490654	0.834041	1	0.87144	0.236822	0.74059	0.462448	0.807498	1	0.255323	0.734745	2.33697	0.138532	1.64293	1	0.492048	0.2521	2.19027	0.0996695	1.57781	1
ENSG00000060749	QSER1	protein_coding	10537	0.523112	0.0489677	1.47223	0.00015648	1.07435	0.0245621	0.0465191	0.921146	0.685034	0.136681	0.400816	1	0.621138	0.00782747	1.43963	0.0141682	1.08767	0.0109978	0.526988	0.0131005	0.75536	0.318413	0.645688	1
ENSG00000060762	MPC1	protein_coding	1546	-1.9927	0.216893	-1.92797	NA	-1.95997	1	-0.802787	0.692975	-2.31422	NA	-1.36901	1	-1.61148	0.28703	0.561447	NA	-0.149592	1	-2.05509	0.117155	0.266552	NA	-0.470366	1
ENSG00000060971	ACAA1	protein_coding	7106	-0.872524	0.434131	-1.98312	0.205378	-1.32349	1	0.193042	0.917242	0.928245	NA	0.606978	1	-2.03703	0.0663327	-1.63111	NA	-1.81984	1	-0.370438	0.727219	-0.673114	NA	-0.513853	1
ENSG00000060982	BCAT1	protein_coding	11775	-1.60173	3.75402e-11	-0.147236	0.83704	-0.698459	1	-1.04814	0.00129894	-0.0900463	0.908013	-0.490981	1	-1.78214	1.82919e-10	1.61249	0.163167	0.743534	1	-1.4934	6.13252e-06	0.157727	0.920787	-0.443495	1
ENSG00000061273	HDAC7	protein_coding	9928	0.364742	0.473883	0.483991	0.627068	0.425598	1	0.763145	0.16239	0.465728	0.617297	0.622087	1	-0.0247691	0.974176	-0.162854	0.907574	-0.0921603	1	0.560538	0.120589	0.148753	0.914009	0.369288	1
ENSG00000061337	LZTS1	protein_coding	5706	1.70208	0.000421622	3.86501	0.0142473	3.15579	0.00733447	0.29887	0.852414	0.885158	NA	0.621593	1	1.29572	0.00112209	1.39054	0.178937	1.34391	1	1.76381	5.11105e-08	-0.0687078	0.958963	1.12083	1
ENSG00000061455	PRDM6	protein_coding	9350	0.1954	NA	-1.82366	NA	-0.486464	1	0.964378	0.77522	0.732947	NA	0.853298	1	-0.662867	NA	-1.26744	NA	-0.933714	1	0.202034	NA	-2.4559	NA	-0.585774	1
ENSG00000061492	WNT8A	protein_coding	2089	NA	NA	NA	NA	0	1	-1.34429	NA	-3.21968	NA	-1.99657	1	2.61233	NA	-0.899863	NA	1.73354	1	0.992856	NA	-1.77155	NA	0.19094	1
ENSG00000061656	SPAG4	protein_coding	2240	0.703387	NA	0.0195268	NA	0.401603	1	0.464252	NA	-0.374541	NA	0.104976	1	-1.04352	NA	-2.45877	NA	-1.58415	1	-1.23511	0.64213	-1.05789	NA	-1.14378	1
ENSG00000061676	NCKAP1	protein_coding	22520	1.81308	9.12221e-18	2.19724	1.40412e-10	2.01791	7.0206e-11	1.52179	3.47736e-09	1.8987	2.61934e-11	1.72252	1.75178e-09	1.86737	9.35402e-22	2.26089	5.41007e-05	2.0775	2.70503e-05	1.7654	3.10415e-26	1.94576	0.00109386	1.8584	0.000546931
ENSG00000061794	MRPS35	protein_coding	1979	-0.174325	0.82367	0.0329752	0.985107	-0.0669546	1	0.477475	0.654014	0.32252	0.85505	0.402077	1	-0.282764	0.780442	1.56043	NA	0.915112	1	-0.359054	0.633281	-0.0288876	NA	-0.184546	1
ENSG00000061918	GUCY1B3	protein_coding	3724	0.384509	0.630827	1.72443	NA	1.20474	1	1.63044	0.150111	3.0424	0.158888	2.50267	1	1.20937	0.218551	1.493	NA	1.35815	1	0.830893	0.351125	1.28813	NA	1.07755	1
ENSG00000061936	SFSWAP	protein_coding	10157	1.22618	0.00194105	0.340445	0.715175	0.850247	1	1.82446	0.000176534	1.8056	0.0161437	1.81506	0.00816011	1.04035	0.0290658	-1.00967	0.277289	0.35241	1	1.43382	5.15678e-05	0.15347	0.93097	0.93125	1
ENSG00000061938	TNK2	protein_coding	12015	1.45252	0.00207034	0.398258	0.72103	1.01962	1	1.09447	0.0934388	-0.586669	0.503805	0.486059	1	0.744398	0.0490158	-0.38006	0.710701	0.289056	1	0.892361	0.0123055	-0.479961	0.695701	0.363568	1
ENSG00000061987	MON2	protein_coding	16017	0.417237	0.16884	0.955769	0.118783	0.711487	1	0.155902	0.714883	0.915964	0.0975626	0.585418	1	0.403794	0.1936	-0.619102	0.361556	-0.018835	1	0.146152	0.611294	-0.116327	0.917581	0.0208734	1
ENSG00000062038	CDH3	protein_coding	6236	1.90305	0.107365	0.214276	NA	1.29282	1	1.38266	0.150967	0.0503347	0.978067	0.865127	1	0.740309	0.645347	2.74751	NA	2.068	1	1.26614	0.0534482	0.626599	0.760564	0.981522	1
ENSG00000062096	ARSF	protein_coding	2204	-0.474239	NA	NA	NA	0	1	-0.773478	0.84861	-1.15772	NA	-0.952843	1	NA	NA	NA	NA	0	1	NA	NA	NA	NA	0	1
ENSG00000062194	GPBP1	protein_coding	6472	0.465676	0.152649	0.125947	0.861175	0.305788	1	0.171466	0.729916	0.186958	0.805627	0.179233	1	0.909108	0.00136562	-0.677062	0.297435	0.323843	1	0.966346	1.88415e-05	-0.234201	0.814193	0.487507	1
ENSG00000062282	DGAT2	protein_coding	7905	1.01663	NA	-1.98684	NA	0.186172	1	-0.843069	0.761798	0.255049	NA	-0.191959	1	-0.765372	0.820911	0.0750326	NA	-0.284822	1	0.238209	NA	-2.27463	NA	-0.528871	1
ENSG00000062370	ZNF112	protein_coding	3848	-0.982112	0.215776	-0.238619	NA	-0.562991	1	-1.78279	0.0725103	-1.37505	0.486605	-1.56456	1	-0.580887	0.458858	-1.54536	0.24832	-0.983985	1	-0.877093	0.151816	-0.799543	0.658099	-0.837797	1
ENSG00000062485	CS	protein_coding	6402	0.0728759	0.891449	0.311094	0.790136	0.196896	1	0.0991208	0.900776	-0.233352	0.828527	-0.0575594	1	0.20475	0.761293	0.701437	0.66232	0.474363	1	0.0826407	0.868421	0.112649	0.944005	0.0977229	1
ENSG00000062524	LTK	protein_coding	3490	2.51516	NA	-1.47787	NA	1.60303	1	-0.572873	NA	-1.4401	NA	-0.942281	1	1.48924	NA	-2.10807	NA	0.603769	1	0.360394	NA	-2.65548	NA	-0.471437	1
ENSG00000062582	MRPS24	protein_coding	2613	0.665578	NA	-1.37783	NA	-0.021071	1	0.474498	NA	-2.74458	NA	-0.378339	1	1.45133	NA	-1.26744	NA	0.655353	1	-1.59912	NA	-3.54255	NA	-2.26569	1
ENSG00000062598	ELMO2	protein_coding	6598	1.94884	1.1553e-08	1.25455	0.0876381	1.64307	1	1.39602	0.00236412	1.06629	0.176969	1.24056	1	2.12549	2.83677e-09	0.750558	0.452622	1.59597	1	1.84479	3.19447e-08	1.35357	0.197234	1.61998	1
ENSG00000062650	WAPL	protein_coding	7228	1.86396	4.22238e-13	2.16456	7.36429e-07	2.02207	3.68215e-07	1.45216	5.91328e-07	1.98134	3.46129e-06	1.74088	2.02631e-06	1.83527	3.14311e-14	1.92918	0.00291467	1.88299	0.00145734	1.81988	1.62116e-19	2.07214	0.00718129	1.95151	0.00359064
ENSG00000062716	VMP1	protein_coding	6916	-1.60976	0.000502647	-0.675019	0.627675	-1.06798	1	-1.68873	0.00113374	-1.1393	0.28172	-1.38802	1	-1.7468	0.00264677	-0.193877	NA	-0.770763	1	-2.21005	1.92032e-07	-0.904319	0.567974	-1.41424	1
ENSG00000062725	APPBP2	protein_coding	9876	-0.444269	0.260592	-0.021862	0.98477	-0.217661	1	-0.243252	0.686935	0.00334306	0.997441	-0.114692	1	-0.720872	0.0327775	0.747032	0.504765	0.192236	1	-0.868714	0.00441558	0.770548	0.518832	0.172201	1
ENSG00000062822	POLD1	protein_coding	4858	2.70362	1.87006e-13	2.72831	0.00131097	2.71602	0.000655487	2.86219	5.04754e-09	1.14401	0.129424	2.24506	1	2.19197	0.00431759	1.56138	NA	1.91086	1	2.82376	9.50319e-06	0.914933	0.640763	2.16439	1
ENSG00000063015	SEZ6	protein_coding	5115	-1.04548	0.652248	-0.9628	NA	-1.00355	1	0.521905	NA	0.0227152	NA	0.293794	1	0.0896396	0.929609	2.3702	NA	1.64021	1	1.05542	0.409565	1.44045	NA	1.26074	1
ENSG00000063046	EIF4B	protein_coding	6146	0.493468	0.216013	0.286954	0.615683	0.393903	1	0.648561	0.0850823	1.1983	0.00847648	0.949461	1	0.575289	0.131904	0.364764	0.721574	0.473863	1	0.949245	0.000259016	1.24428	0.177892	1.10429	1
ENSG00000063127	SLC6A16	protein_coding	3599	-1.4773	0.0182886	-1.06494	0.500899	-1.25644	1	-2.23603	0.00312687	-2.20579	0.0671216	-2.22083	1	-1.96702	0.0933781	0.0285909	NA	-0.648602	1	-1.86299	0.0280308	-0.830872	NA	-1.25654	1
ENSG00000063169	BICRA	protein_coding	7507	1.27037	0.00613185	0.485471	0.645644	0.930654	1	0.891664	0.202061	-0.348722	0.720524	0.400862	1	1.36054	0.00709833	1.11286	0.354313	1.24201	1	1.31787	0.000201956	-0.0291329	0.983647	0.796175	1
ENSG00000063176	SPHK2	protein_coding	6009	-0.0192069	0.983602	0.957034	NA	0.54996	1	0.0943753	0.949583	-0.77076	0.627417	-0.274292	1	0.111614	0.89719	-1.66394	0.095363	-0.518689	1	0.341897	0.619679	-0.431503	0.794725	0.0064134	1
ENSG00000063177	RPL18	protein_coding	4209	-0.500338	0.261891	-0.790152	0.310937	-0.63798	1	0.102267	0.928688	-1.26314	0.0297044	-0.424595	1	1.03461	0.117865	0.434888	0.827892	0.76569	1	1.01374	0.0347113	-0.989411	0.379423	0.335035	1
ENSG00000063180	CA11	protein_coding	2075	-0.935962	0.448116	0.319401	NA	-0.175838	1	-0.269451	0.871679	-1.08483	0.576676	-0.620286	1	-0.768307	0.367374	-1.64881	0.269088	-1.1424	1	-0.147173	0.850134	-0.950285	0.567974	-0.493552	1
ENSG00000063241	ISOC2	protein_coding	4408	0.541454	0.684362	0.891554	NA	0.727098	1	0.491134	0.797731	-0.642028	NA	0.0330609	1	0.197713	0.940377	-0.446216	NA	-0.0886198	1	1.55116	0.305197	0.843824	NA	1.24041	1
ENSG00000063244	U2AF2	protein_coding	4115	1.2009	6.2275e-05	-0.0165445	0.98432	0.716961	1	1.32246	0.000801459	1.53003	0.0391101	1.42997	0.0199558	0.236972	0.595239	-0.556466	0.522728	-0.105875	1	0.548472	0.066199	-0.0453967	0.974873	0.281882	1
ENSG00000063245	EPN1	protein_coding	17616	0.793171	0.0256448	-0.252034	0.763355	0.363222	1	1.19744	0.0105303	0.231571	0.771519	0.79387	1	0.871428	0.00983243	0.355178	0.760232	0.636273	1	0.707957	0.0100149	-0.0576891	0.962029	0.37534	1
ENSG00000063322	MED29	protein_coding	3835	-1.42358	0.0210014	-1.56173	0.216613	-1.491	1	-1.33608	0.202791	-1.94592	0.134499	-1.60902	1	-1.21215	0.121911	1.29006	NA	0.524572	1	-0.742555	0.202331	-0.437219	NA	-0.581824	1
ENSG00000063438	AHRR	protein_coding	7678	1.81865	0.482206	-0.499237	NA	1.08235	1	-0.890448	0.73606	-2.34062	NA	-1.44051	1	-0.816246	NA	-0.661325	NA	-0.736707	1	0.961834	0.464476	0.0840464	NA	0.588695	1
ENSG00000063515	GSC2	protein_coding	1033	1.68758	NA	-1.47167	NA	0.840658	1	NA	NA	NA	NA	0	1	NA	NA	NA	NA	0	1	NA	NA	-3.60387	NA	0	1
ENSG00000063587	ZNF275	protein_coding	8139	-0.275857	0.685888	-0.26207	0.871758	-0.268947	1	-0.849527	0.251491	-1.76793	0.0313567	-1.23685	1	-0.322877	0.628316	-0.27707	0.874865	-0.299792	1	-0.331404	0.53535	0.0324012	0.985264	-0.138064	1
ENSG00000063601	MTMR1	protein_coding	6323	1.11675	0.0138805	2.38374	0.0436903	1.88508	0.0287854	1.14442	0.0618469	2.63568	0.024724	2.07472	1	0.883154	0.0711893	1.32181	0.327611	1.11909	1	1.0924	0.00955717	1.33865	0.331728	1.22077	1
ENSG00000063660	GPC1	protein_coding	6516	0.720542	0.0714016	-0.0644864	0.948781	0.380778	1	1.15813	0.0493665	-0.680744	0.397154	0.513754	1	0.529755	0.199531	-1.27278	0.0894791	-0.106602	1	0.802299	0.0147757	-0.936167	0.285111	0.180464	1
ENSG00000063761	ADCK1	protein_coding	5317	1.64088	0.124519	3.58273	NA	2.91647	1	1.46499	0.416784	2.64439	NA	2.172	1	1.1806	0.426308	0.425652	NA	0.851957	1	1.85321	0.297698	2.1852	NA	2.02874	1
ENSG00000063854	HAGH	protein_coding	5975	0.199397	0.859483	-0.990401	0.539416	-0.276174	1	0.561435	0.620171	0.41871	0.849694	0.491837	1	-0.0300516	0.978142	-1.22063	0.4668	-0.505861	1	0.170404	0.844498	-0.362976	NA	-0.0717758	1
ENSG00000063978	RNF4	protein_coding	7270	-1.21509	0.0104215	-0.845475	0.481652	-1.01848	1	-0.682725	0.309095	1.05774	0.49801	0.435448	1	0.246736	0.757313	0.421132	NA	0.336568	1	-1.2322	0.00907577	-0.542894	0.775837	-0.846764	1
ENSG00000064012	CASP8	protein_coding	7243	-0.00278626	NA	-2.29708	NA	-0.735109	1	-0.810263	NA	-1.1508	NA	-0.970508	1	-1.98807	NA	NA	NA	0	1	-2.23095	NA	NA	NA	0	1
ENSG00000064042	LIMCH1	protein_coding	10862	1.46917	3.59504e-05	0.666044	0.429808	1.12278	1	1.5211	0.00333167	2.3968	0.00516272	2.0244	0.0042472	1.28014	0.00184622	0.803543	0.47901	1.06143	1	1.55705	1.36052e-08	1.13694	0.232189	1.36223	1
ENSG00000064102	INTS13	protein_coding	3345	0.607203	0.284716	0.63906	0.646903	0.623219	1	0.654478	0.383995	-0.316067	0.803901	0.249326	1	0.529206	0.459448	0.903971	NA	0.728724	1	0.678391	0.173765	0.544553	0.754515	0.613023	1
ENSG00000064115	TM7SF3	protein_coding	3888	0.152781	0.783796	0.394062	0.707689	0.27846	1	0.435709	0.546457	-0.306587	0.728588	0.111784	1	-0.0107861	0.99211	0.0725014	NA	0.0314586	1	0.265872	0.686939	1.45901	0.387576	0.982424	1
ENSG00000064195	DLX3	protein_coding	2715	1.12007	NA	0.0874355	NA	0.694238	1	0.457667	NA	-1.30777	NA	-0.170342	1	-0.58669	NA	0.00936729	NA	-0.258095	1	0.150624	NA	-1.70133	NA	-0.496599	1
ENSG00000064199	SPA17	protein_coding	5205	-1.47289	0.102004	-1.05248	NA	-1.24743	1	-2.68031	0.0700076	-1.57209	NA	-2.02231	1	-0.839693	0.570484	0.660654	NA	0.0973153	1	-2.77116	0.0127855	-0.0813231	NA	-0.873455	1
ENSG00000064201	TSPAN32	protein_coding	3793	-0.0875248	NA	NA	NA	0	1	NA	NA	NA	NA	0	1	NA	NA	NA	NA	0	1	NA	NA	NA	NA	0	1
ENSG00000064205	WISP2	protein_coding	4981	-0.0262819	NA	-3.15827	NA	-0.87044	1	NA	NA	NA	NA	0	1	NA	NA	NA	NA	0	1	NA	NA	-4.30837	NA	0	1
ENSG00000064218	DMRT3	protein_coding	2387	1.75212	0.0372061	1.9602	NA	1.85991	1	2.28953	NA	1.47059	NA	1.93741	1	1.71573	0.605576	0.688354	NA	1.29163	1	1.04281	NA	-1.70133	NA	0.243509	1
ENSG00000064225	ST3GAL6	protein_coding	6288	-1.30464	0.324934	-1.0796	NA	-1.18773	1	-1.62212	0.206351	-0.0629664	NA	-0.641432	1	-2.45415	0.253008	-1.31403	NA	-1.77428	1	-1.25901	0.500706	-0.0153157	NA	-0.5071	1
ENSG00000064270	ATP2C2	protein_coding	7352	3.07754	NA	-2.15895	NA	2.11531	1	2.3771	0.497926	-1.96184	NA	1.44668	1	3.87953	0.187768	-1.55649	NA	2.91248	1	-0.0873859	0.977956	-2.23103	NA	-0.793065	1
ENSG00000064300	NGFR	protein_coding	4150	0.0922636	0.836342	0.933721	0.302169	0.57349	1	1.27715	0.0097645	0.204334	0.777916	0.838246	1	0.809581	0.332109	2.28317	NA	1.72687	1	0.662923	0.261268	0.364656	0.848876	0.521484	1
ENSG00000064309	CDON	protein_coding	10600	0.149826	0.678313	0.686315	0.31207	0.442866	1	-0.601487	0.589185	0.309012	0.894651	-0.0755706	1	-0.457251	0.330053	-1.38576	0.103064	-0.848061	1	-0.710593	0.251273	-0.873438	0.618989	-0.789719	1
ENSG00000064313	TAF2	protein_coding	6547	0.79828	0.0298667	1.08062	0.166548	0.946346	1	0.884973	0.11512	0.791328	0.375123	0.83891	1	1.24733	0.00051655	0.860836	0.471234	1.06699	1	1.62137	2.59451e-08	1.17685	0.32711	1.41616	1
ENSG00000064393	HIPK2	protein_coding	15402	0.000865356	0.997796	0.346644	0.512874	0.184089	1	-0.171987	0.674803	-0.44922	0.393513	-0.303954	1	0.194233	0.453394	0.466579	0.474326	0.336823	1	0.169442	0.428269	0.450804	0.580342	0.316971	1
ENSG00000064419	TNPO3	protein_coding	4676	1.62656	1.10952e-10	1.6973	0.000452166	1.66236	0.000226083	1.75671	5.19129e-07	1.7289	0.000218662	1.74288	0.000109591	1.76987	1.00821e-08	1.59804	0.0227769	1.68651	0.0113885	1.9965	5.39971e-18	1.08585	0.180991	1.61186	1
ENSG00000064489	BORCS8-MEF2B	protein_coding	1931	NA	NA	NA	NA	0	1	NA	NA	NA	NA	0	1	NA	NA	NA	NA	0	1	NA	NA	NA	NA	0	1
ENSG00000064490	RFXANK	protein_coding	2503	0.170693	0.872944	-0.442482	0.822094	-0.10356	1	0.897164	0.54858	-0.748929	0.678021	0.29716	1	0.705734	0.675502	-0.622392	NA	0.189392	1	0.786618	0.516537	0.74631	NA	0.766605	1
ENSG00000064545	TMEM161A	protein_coding	3281	-0.66946	0.505548	1.44273	NA	0.74291	1	0.273203	0.859533	-0.464833	0.829473	-0.0491264	1	-0.737733	0.637552	1.25514	NA	0.578499	1	-0.25413	0.836255	0.312527	NA	0.0568427	1
ENSG00000064547	LPAR2	protein_coding	2980	0.365251	0.610167	0.195538	0.91302	0.282889	1	0.129826	0.913405	-1.02468	0.436569	-0.334897	1	0.220152	0.765526	-0.974654	0.412841	-0.256943	1	-0.0396932	0.944942	-1.25259	0.262564	-0.522264	1
ENSG00000064601	CTSA	protein_coding	5856	-0.687309	0.519578	-0.977879	NA	-0.825291	1	-0.724213	0.620566	-2.27011	0.0822742	-1.29931	1	-0.819536	0.444011	-0.137791	NA	-0.438763	1	0.0322076	0.981746	-1.31431	NA	-0.48935	1
ENSG00000064607	SUGP2	protein_coding	8468	1.1099	5.46149e-06	0.79818	0.0803135	0.962442	1	1.40939	2.53865e-06	0.751406	0.0837143	1.11759	1	0.987622	3.98463e-05	0.707977	0.311906	0.854565	1	1.12928	2.93506e-08	0.640695	0.433062	0.905574	1
ENSG00000064651	SLC12A2	protein_coding	10664	0.482025	0.247228	-0.0293385	0.97586	0.248882	1	0.944	0.0501374	1.42092	0.0760594	1.20208	1	0.0430167	0.948633	0.0812667	0.956505	0.0622685	1	0.328808	0.351293	1.57894	0.135608	1.08525	1
ENSG00000064652	SNX24	protein_coding	3550	-1.35105	0.127324	-1.67539	NA	-1.50413	1	-1.19345	0.365472	0.505637	NA	-0.107021	1	-2.97986	0.0211027	-1.15214	NA	-1.79407	1	-1.80951	0.0506714	-0.621214	NA	-1.09633	1
ENSG00000064655	EYA2	protein_coding	3618	0.659072	0.605494	0.666475	NA	0.662778	1	1.50588	0.54858	1.14018	NA	1.33459	1	-0.032687	0.992654	0.694971	NA	0.37654	1	1.39932	0.536119	1.3484	NA	1.37408	1
ENSG00000064666	CNN2	protein_coding	3645	-0.620799	0.127826	0.41701	0.731067	-0.0105209	1	0.298258	0.644305	0.0130289	0.990888	0.162681	1	-0.118121	0.861132	1.00397	0.578094	0.549369	1	0.156856	0.756498	1.72028	0.290234	1.14073	1
ENSG00000064687	ABCA7	protein_coding	8367	2.00413	0.000640824	0.238884	0.88015	1.37616	1	1.96992	0.00306482	1.43804	0.229352	1.72835	1	0.724341	0.173871	0.868161	0.534097	0.798042	1	1.30523	0.00979196	0.0340904	0.983839	0.805353	1
ENSG00000064692	SNCAIP	protein_coding	7325	1.7355	0.00142285	0.835637	0.471007	1.35462	1	1.76431	0.015715	1.63015	0.203943	1.69879	1	1.16349	0.0415738	1.37387	0.433667	1.27251	1	1.92318	4.21075e-07	1.60095	0.198206	1.77104	1
ENSG00000064703	DDX20	protein_coding	6019	0.616615	0.243074	1.15893	0.367754	0.913107	1	0.845511	0.256642	1.40018	0.274909	1.14934	1	0.980046	0.142412	0.439915	0.810575	0.735112	1	0.763775	0.134909	0.57644	0.732649	0.673146	1
ENSG00000064726	BTBD1	protein_coding	4169	-0.21649	0.674161	0.966476	0.412494	0.492991	1	0.108422	0.867882	2.30374	0.0138794	1.58866	1	-0.845696	0.0284561	1.56524	0.265591	0.813815	1	-0.350984	0.317383	1.48965	0.209988	0.844894	1
ENSG00000064763	FAR2	protein_coding	5411	-0.88908	0.695489	-2.44908	NA	-1.46776	1	-1.97432	NA	-3.36009	NA	-2.50685	1	0.298177	0.894928	2.04406	NA	1.42052	1	0.333978	0.835933	0.485265	NA	0.411604	1
ENSG00000064787	BCAS1	protein_coding	8186	1.75126	NA	-1.37783	NA	0.907397	1	NA	NA	NA	NA	0	1	0.692498	NA	-1.26744	NA	0.0225279	1	NA	NA	NA	NA	0	1
ENSG00000064835	POU1F1	protein_coding	1569	1.75126	NA	-1.37783	NA	0.907397	1	NA	NA	NA	NA	0	1	NA	NA	-3.20604	NA	0	1	-0.84818	NA	NA	NA	0	1
ENSG00000064886	CHI3L2	protein_coding	3295	1.68758	NA	-3.16126	NA	0.736799	1	1.56198	NA	-1.12778	NA	0.769862	1	0.551482	NA	-1.3335	NA	-0.102841	1	NA	NA	-3.54255	NA	0	1
ENSG00000064932	SBNO2	protein_coding	6626	2.66546	9.72093e-09	2.03954	0.0606789	2.38618	1	3.1645	6.62971e-08	1.05696	0.194243	2.46555	1	1.87193	0.00217905	2.33763	NA	2.12349	1	2.64395	3.7235e-09	1.07901	0.441471	2.06402	1
ENSG00000064933	PMS1	protein_coding	5454	0.381503	0.364806	1.52296	0.087755	1.06229	1	0.146299	0.841004	-0.180564	0.865433	-0.00789518	1	0.328272	0.579142	0.0300287	0.985967	0.186843	1	0.223569	0.644967	0.174725	0.927836	0.199354	1
ENSG00000064961	HMG20B	protein_coding	3857	0.537415	0.546555	0.623077	0.766655	0.580882	1	1.21301	0.307265	1.00052	0.641341	1.11067	1	-0.824272	0.633118	-1.38693	NA	-1.07834	1	0.59749	0.567992	0.367575	NA	0.487108	1
ENSG00000064989	CALCRL	protein_coding	6144	-1.77787	0.0387485	-0.418503	NA	-0.943675	1	-0.626875	0.723444	1.07742	NA	0.463538	1	-1.33196	0.635533	0.00936729	NA	-0.510722	1	-1.06336	0.64063	-0.257603	NA	-0.604945	1
ENSG00000064995	TAF11	protein_coding	1580	-1.18546	0.0808291	-0.685286	0.709266	-0.913805	1	-1.12439	0.211495	-0.88902	0.604803	-1.00191	1	-1.10682	0.222251	-1.04762	NA	-1.07692	1	-1.48231	0.025254	-1.47909	NA	-1.4807	1
ENSG00000064999	ANKS1A	protein_coding	6777	1.85556	2.31818e-09	1.36423	0.0869514	1.63071	1	2.23332	4.28994e-07	0.212738	0.785194	1.55115	1	2.13757	1.28697e-14	1.47908	0.0464012	1.84558	0.0232006	2.40509	1.47178e-19	1.65649	0.0740696	2.07881	1
ENSG00000065000	AP3D1	protein_coding	8601	2.69405	3.15549e-29	1.12766	0.00574524	2.11375	0.00287262	2.77367	8.1426e-17	1.62628	2.25057e-06	2.31115	1.12528e-06	2.93277	7.51793e-39	0.664401	0.278646	2.20487	1	3.53033	1.67567e-47	2.30876	0.00170171	3.04515	0.000850855
ENSG00000065029	ZNF76	protein_coding	6789	-0.405634	0.597011	-0.37963	0.833224	-0.392574	1	-0.300962	0.811324	-1.51788	0.181812	-0.784746	1	-0.257578	0.797193	-1.26067	NA	-0.673647	1	-0.13768	0.857113	-0.104989	NA	-0.121242	1
ENSG00000065054	SLC9A3R2	protein_coding	3550	1.80616	0.525048	-1.61552	NA	0.934875	1	0.844416	0.800518	0.64399	NA	0.74768	1	0.828485	0.650139	1.21351	NA	1.0338	1	2.76651	0.0787673	1.82567	NA	2.37146	1
ENSG00000065057	NTHL1	protein_coding	2430	-0.168447	0.953917	-0.740436	NA	-0.426278	1	1.09793	0.639535	2.62095	NA	2.05172	1	1.02482	0.727418	-1.12035	NA	0.318863	1	1.09914	0.609003	1.42159	NA	1.26935	1
ENSG00000065060	UHRF1BP1	protein_coding	9908	1.44895	2.35262e-07	1.88606	0.00056524	1.684	0.000282737	1.36046	2.56205e-05	1.46479	0.00221763	1.41357	0.00112162	1.67329	1.72943e-09	2.03195	0.00778801	1.86374	0.00389401	1.94569	9.97844e-17	1.15016	0.209988	1.60208	1
ENSG00000065135	GNAI3	protein_coding	27174	-1.2486	4.69079e-05	-0.0869122	0.936958	-0.553859	1	-1.11207	0.00630571	-0.501989	0.499223	-0.77502	1	-1.57583	7.72341e-08	-0.626428	0.553202	-1.0244	1	-1.36022	4.95509e-09	0.347778	0.801804	-0.266973	1
ENSG00000065150	IPO5	protein_coding	9671	2.66851	4.95793e-26	2.78064	2.23904e-22	2.72567	1.11977e-22	2.63335	1.07583e-19	2.47242	7.15949e-15	2.55513	3.5798e-15	2.68798	1.728e-27	2.48649	5.98232e-07	2.59075	2.99116e-07	2.88524	1.71684e-65	2.76295	2.95703e-06	2.82539	1.47851e-06
ENSG00000065154	OAT	protein_coding	3388	-0.0677875	0.935908	0.855244	0.640677	0.466322	1	0.84914	0.367936	5.33815	0.00709	4.40101	1	0.00991548	0.993734	1.08276	NA	0.643851	1	0.553852	0.456482	-0.385872	0.844698	0.159188	1
ENSG00000065183	WDR3	protein_coding	10275	1.73896	4.25019e-08	2.29928	0.0017489	2.04615	0.00087447	2.09065	1.0642e-07	1.48499	0.0135825	1.81937	0.00679129	1.74266	3.61431e-05	1.74075	0.148493	1.74171	1	1.85558	7.30777e-09	1.33429	0.213133	1.61835	1
ENSG00000065243	PKN2	protein_coding	6897	0.244355	0.461961	0.726356	0.211364	0.505392	1	0.333029	0.402927	0.835315	0.145092	0.605922	1	0.270599	0.542637	-0.0172166	0.990019	0.133857	1	0.422299	0.123898	0.444949	0.709282	0.433668	1
ENSG00000065268	WDR18	protein_coding	2357	0.695368	0.419501	1.08889	NA	0.905504	1	2.0961	0.0207029	1.37412	0.380246	1.77981	1	0.873583	0.462985	0.743695	NA	0.8101	1	0.653274	0.501624	0.358686	NA	0.513486	1
ENSG00000065308	TRAM2	protein_coding	6908	-2.30194	0.00010039	-1.85199	0.171348	-2.0595	1	-1.02553	0.197373	-0.338031	0.854512	-0.641208	1	-1.2396	0.183841	2.05539	NA	1.19536	1	-0.836361	0.141554	0.099412	0.96722	-0.293897	1
ENSG00000065320	NTN1	protein_coding	6383	1.07662	0.172725	1.16316	NA	1.12054	1	0.672954	0.192657	-0.392604	0.65042	0.236393	1	0.545863	0.560583	0.229009	NA	0.396117	1	0.698525	0.0392424	1.38482	0.178381	1.0821	1
ENSG00000065325	GLP2R	protein_coding	6052	0.812987	NA	-1.47167	NA	0.0823004	1	0.309205	NA	-2.21864	NA	-0.460103	1	2.22711	NA	-1.32861	NA	1.34486	1	NA	NA	NA	NA	0	1
ENSG00000065328	MCM10	protein_coding	5454	1.05082	0.00834253	0.489061	0.615683	0.797115	1	1.24855	0.082232	1.04527	0.426068	1.15049	1	0.688541	0.455104	0.68365	NA	0.686097	1	0.488748	0.595258	1.69742	NA	1.21612	1
ENSG00000065357	DGKA	protein_coding	10215	0.888938	0.614881	-0.4749	NA	0.362514	1	0.678469	0.781601	0.079377	NA	0.4098	1	1.39859	0.449744	1.10824	NA	1.26071	1	0.943382	0.437986	-0.862047	NA	0.30638	1
ENSG00000065361	ERBB3	protein_coding	8658	1.7165	0.0216208	1.52392	NA	1.62342	1	1.96166	0.0570114	2.42365	0.231855	2.21107	1	1.45668	0.311744	2.203	NA	1.87757	1	-1.62113	0.524641	-0.696271	NA	-1.08582	1
ENSG00000065371	ROPN1	protein_coding	4518	NA	NA	NA	NA	0	1	NA	NA	NA	NA	0	1	NA	NA	NA	NA	0	1	1.04281	NA	-1.70133	NA	0.243509	1
ENSG00000065413	ANKRD44	protein_coding	10839	0.697693	0.3848	0.809043	0.65556	0.754442	1	-0.491583	0.663876	0.614824	0.795739	0.165182	1	0.00503631	0.994872	0.597376	0.736357	0.331395	1	0.114079	0.769316	-0.221526	0.856827	-0.0439865	1
ENSG00000065427	KARS	protein_coding	4065	1.95058	1.19884e-07	2.4494	0.00172854	2.22144	0.000864328	2.34658	8.77354e-07	1.26947	0.0623089	1.90629	1	2.18667	1.06861e-06	0.850689	0.499493	1.66809	1	2.27643	4.85498e-11	1.84766	0.134753	2.07791	1
ENSG00000065457	ADAT1	protein_coding	4486	0.950822	0.254634	2.85801	NA	2.19899	1	1.29436	0.234844	2.07304	0.30737	1.73561	1	0.174755	0.886901	0.61848	NA	0.41361	1	1.39937	0.0310648	0.676538	NA	1.08276	1
ENSG00000065485	PDIA5	protein_coding	4030	0.198127	0.932022	-0.818317	NA	-0.222371	1	0.0943186	0.967716	1.50529	NA	0.965831	1	0.714873	0.842677	0.466422	NA	0.595989	1	-0.274525	0.916322	-0.315763	NA	-0.294997	1
ENSG00000065491	TBC1D22B	protein_coding	3462	-0.00487232	0.99539	-0.537788	0.718201	-0.246862	1	0.475275	0.677819	-1.61894	0.0633434	-0.221154	1	0.888746	0.206795	0.623461	NA	0.762193	1	0.630884	0.354377	-0.596423	0.71736	0.143985	1
ENSG00000065518	NDUFB4	protein_coding	1889	-0.585142	0.500056	-0.127401	NA	-0.338193	1	-1.03359	0.426028	-0.756973	NA	-0.888661	1	-0.286305	0.805225	-1.18307	NA	-0.666105	1	-0.609987	0.405627	-0.541677	NA	-0.575427	1
ENSG00000065526	SPEN	protein_coding	13294	2.51819	1.85112e-29	1.96362	1.0904e-09	2.26739	5.45199e-10	2.40326	8.69067e-21	1.48066	1.60818e-05	2.01449	8.04091e-06	3.39187	1.62881e-82	2.02184	3.11327e-05	2.86372	1.55663e-05	3.45962	4.27562e-83	2.471	0.000106662	3.04838	5.33312e-05
ENSG00000065534	MYLK	protein_coding	22167	2.53158	1.51591e-14	2.46174	0.00026643	2.49708	0.000133215	3.16389	1.82355e-11	3.4161	3.17321e-05	3.2955	1.5866e-05	2.45611	2.51707e-05	4.47335	0.0207382	3.79184	0.0103817	2.9896	3.87842e-08	3.48921	0.0321072	3.26093	0.0160536
ENSG00000065548	ZC3H15	protein_coding	3125	0.413191	0.359736	0.134268	0.906322	0.28046	1	0.358435	0.564351	-0.197327	0.849085	0.107152	1	0.332349	0.528363	-0.732919	0.474867	-0.104118	1	0.476145	0.236881	0.183458	0.920665	0.337211	1
ENSG00000065559	MAP2K4	protein_coding	5714	-0.652528	0.202807	0.791349	0.594654	0.242972	1	-0.742862	0.28386	0.175773	0.923608	-0.21163	1	0.0318114	0.964064	1.68238	0.264108	1.0813	1	-0.213109	0.636781	0.480257	0.769213	0.174834	1
ENSG00000065600	TMEM206	protein_coding	2914	-0.66794	0.556822	-0.917708	NA	-0.787425	1	0.0959575	0.946279	-0.898963	0.533181	-0.317385	1	-0.17536	0.9045	0.505093	NA	0.204617	1	-0.510849	0.539384	-0.712817	NA	-0.608302	1
ENSG00000065609	SNAP91	protein_coding	6651	1.28123	0.0170299	1.91106	0.110928	1.63025	1	0.901768	0.292461	1.70482	0.292553	1.35846	1	0.501623	0.0867922	1.15354	0.136278	0.864096	1	0.783398	0.0048511	1.21974	0.175379	1.018	1
ENSG00000065613	SLK	protein_coding	7974	1.78967	4.94751e-13	1.5863	0.000298237	1.69157	0.000149119	1.73175	1.20475e-07	1.62568	9.40816e-05	1.67969	4.7101e-05	1.815	9.11552e-14	0.969387	0.225283	1.45328	1	1.87832	1.32671e-18	1.08023	0.271886	1.53377	1
ENSG00000065615	CYB5R4	protein_coding	9635	0.0412142	0.959853	1.87624	0.276315	1.23271	1	-0.560755	0.596586	-0.625142	0.678504	-0.59259	1	-0.0219803	0.977231	1.26143	0.430211	0.757965	1	0.160291	0.765124	0.270446	0.871883	0.21642	1
ENSG00000065618	COL17A1	protein_coding	6426	1.67877	NA	-3.58151	NA	0.715924	1	1.46903	NA	-1.59949	NA	0.6315	1	1.90861	0.513763	0.519401	NA	1.37513	1	2.0598	NA	-0.677694	NA	1.26136	1
ENSG00000065621	GSTO2	protein_coding	9921	-1.75078	0.122801	-1.53075	NA	-1.63657	1	-0.913026	0.589185	2.42245	NA	1.55873	1	-1.46915	0.521855	-0.394454	NA	-0.833962	1	-0.861771	0.464011	1.34396	NA	0.627025	1
ENSG00000065665	SEC61A2	protein_coding	3916	-2.27393	2.61054e-05	-1.71921	0.177858	-1.97007	1	-1.97586	0.00713321	-1.47546	0.262081	-1.70407	1	-2.02419	0.000675041	-1.82585	NA	-1.92161	1	-1.69926	0.000139599	0.120563	NA	-0.519628	1
ENSG00000065675	PRKCQ	protein_coding	3295	2.38067	0.17906	-0.667207	NA	1.54535	1	0.878395	0.60976	1.63067	NA	1.30302	1	3.35059	0.282612	-1.2425	NA	2.40916	1	0.342766	0.891596	-0.778043	NA	-0.111428	1
ENSG00000065717	TLE2	protein_coding	4038	0.841458	NA	-2.29385	NA	-0.00303972	1	0.702317	0.71501	1.21033	NA	0.978568	1	1.26215	0.663343	-0.63542	NA	0.605156	1	0.992979	0.12957	0.914984	NA	0.954509	1
ENSG00000065802	ASB1	protein_coding	7410	-0.0848816	0.874801	0.0636694	0.95993	-0.00869495	1	-0.176901	0.821221	-0.0660033	0.956088	-0.120387	1	0.715383	0.101422	1.10968	0.368045	0.925959	1	0.95001	0.000657754	1.91085	0.0720592	1.50899	1
ENSG00000065809	FAM107B	protein_coding	7019	-0.758434	0.0509415	-0.896605	0.251156	-0.825866	1	-1.24569	0.0286786	-0.801635	0.484957	-1.00665	1	-0.642048	0.127753	-1.49567	0.0497537	-1.00663	1	-0.479093	0.180347	-0.703314	0.530446	-0.586852	1
ENSG00000065833	ME1	protein_coding	3371	1.56489	0.570827	-0.439673	NA	0.885904	1	1.73102	0.426465	1.13992	NA	1.46553	1	1.45133	NA	-2.06228	NA	0.572425	1	0.320768	0.835623	1.50335	NA	1.02998	1
ENSG00000065882	TBC1D1	protein_coding	9032	2.51247	3.87797e-20	3.10434	2.23681e-09	2.83855	1.11841e-09	2.59828	1.20039e-12	1.71283	0.00130857	2.22245	0.000654283	2.8714	1.33078e-13	3.23897	0.00600292	3.06686	0.00300146	3.35871	1.94264e-21	3.10161	0.00289045	3.23588	0.00144522
ENSG00000065883	CDK13	protein_coding	8921	1.81848	1.98077e-12	1.7184	0.000945545	1.76931	0.000472772	1.47249	1.17411e-05	1.59477	0.00380546	1.53492	0.0019086	1.75274	2.36754e-12	0.614238	0.427077	1.29299	1	1.63502	2.31081e-13	1.37631	0.0968572	1.51146	1
ENSG00000065911	MTHFD2	protein_coding	4870	-0.562041	0.225282	0.588809	0.602864	0.125219	1	-0.7137	0.175769	0.370981	0.750787	-0.071735	1	-0.227132	0.737727	3.42229	NA	2.53291	1	0.104448	0.840263	1.21324	0.425086	0.762844	1
ENSG00000065923	SLC9A7	protein_coding	10033	-0.734031	0.205495	0.399458	0.834214	-0.0587176	1	-0.586703	0.46469	0.0750887	0.969307	-0.218188	1	-0.850375	0.053222	0.0715968	0.970932	-0.31696	1	-0.491583	0.24496	2.50623	0.164466	1.67639	1
ENSG00000065970	FOXJ2	protein_coding	6296	0.17035	0.817908	-0.132202	0.938628	0.0269911	1	0.406962	0.762626	-1.44306	0.166743	-0.239841	1	0.471646	0.479985	0.778689	0.644352	0.633321	1	-0.220922	0.704279	0.899463	0.651581	0.445403	1
ENSG00000065978	YBX1	protein_coding	1930	-1.07551	0.00211561	-1.73189	0.00107014	-1.36669	1	-0.622882	0.275712	-1.21427	0.0757696	-0.888484	1	-0.090815	0.870287	-2.14861	0.000133755	-0.780262	1	-0.0481868	0.919906	-2.04703	0.00375226	-0.726027	1
ENSG00000065989	PDE4A	protein_coding	6646	0.812951	0.458309	0.816786	NA	0.814869	1	2.28851	0.0802034	-0.736657	0.631993	1.45566	1	0.611366	0.341587	1.33339	0.467715	1.01708	1	0.239971	0.789285	0.289756	NA	0.265078	1
ENSG00000066027	PPP2R5A	protein_coding	3825	-0.0974197	0.940799	0.700958	NA	0.356306	1	0.795992	0.450817	-0.346364	0.835771	0.335046	1	0.537017	0.766963	2.51392	NA	1.84049	1	0.606108	0.574949	3.30445	NA	2.51118	1
ENSG00000066032	CTNNA2	protein_coding	7535	2.51538	8.68987e-12	1.72274	0.0161679	2.17283	0.00808395	2.55529	1.58193e-06	3.14182	0.00346232	2.87815	0.00173195	1.34602	7.764e-08	0.447921	0.558416	0.965755	1	2.21319	5.41986e-21	2.20169	0.00956195	2.20745	0.00478098
ENSG00000066044	ELAVL1	protein_coding	6956	-1.21289	4.60843e-05	-0.63494	0.388959	-0.895166	1	-0.512807	0.228738	-0.131382	0.882672	-0.309526	1	-1.62744	1.48031e-08	-0.680535	0.516554	-1.07766	1	-1.36321	5.54739e-08	-0.885052	0.400617	-1.10441	1
ENSG00000066056	TIE1	protein_coding	6694	3.30824	0.0700979	0.552536	NA	2.50744	1	1.95517	0.19967	0.96657	NA	1.54394	1	3.18544	0.232199	-0.718542	NA	2.27873	1	1.54679	0.660907	-1.4492	NA	0.717158	1
ENSG00000066084	DIP2B	protein_coding	10361	2.16648	6.30655e-21	2.25241	2.06099e-08	2.21008	1.03049e-08	2.08999	1.44228e-13	2.57493	1.3549e-12	2.35274	7.49565e-13	2.11338	9.16866e-23	2.45657	1.89075e-05	2.29515	9.45373e-06	2.42388	5.87674e-43	2.97786	4.21472e-07	2.7273	2.10736e-07
ENSG00000066117	SMARCD1	protein_coding	5136	1.40043	2.82019e-08	1.77595	0.00139947	1.60037	0.000699748	1.81722	1.37645e-07	1.22176	0.0179601	1.55	0.00898014	1.1208	0.000222789	0.595023	0.487208	0.881734	1	1.44403	1.01949e-09	1.46977	0.0736293	1.45696	1
ENSG00000066135	KDM4A	protein_coding	5172	2.18748	1.82756e-18	1.66457	0.00162065	1.94959	0.000810323	2.22279	3.95155e-10	1.66452	0.00238405	1.97049	0.00119202	1.93255	2.58009e-12	1.80461	0.012946	1.86999	0.006473	2.37903	3.67409e-21	1.68673	0.02849	2.07401	0.014245
ENSG00000066136	NFYC	protein_coding	5990	-1.12073	0.0396998	-0.521892	0.745193	-0.790461	1	-0.979095	0.211148	-0.104162	0.964094	-0.476295	1	-0.560245	0.397043	-0.996079	0.474867	-0.761767	1	-0.596039	0.300584	0.28294	0.89859	-0.0906186	1
ENSG00000066185	ZMYND12	protein_coding	2195	-2.69756	NA	-3.15827	NA	-2.9096	1	-1.32654	NA	-1.4401	NA	-1.3822	1	NA	NA	NA	NA	0	1	0.908585	NA	-1.44838	NA	0.165839	1
ENSG00000066230	SLC9A3	protein_coding	2783	0.841458	NA	-1.37783	NA	0.122115	1	-1.65609	NA	-1.53274	NA	-1.5931	1	2.05191	NA	-0.640382	NA	1.25945	1	0.9398	NA	-1.81579	NA	0.139019	1
ENSG00000066248	NGEF	protein_coding	4678	0.207102	NA	-1.0121	NA	-0.277366	1	0.518581	NA	0.571931	NA	0.545503	1	4.12368	0.14306	0.600662	NA	3.24402	1	0.714224	0.805509	-1.05266	NA	0.0858854	1
ENSG00000066279	ASPM	protein_coding	10887	1.47833	2.61939e-10	1.82097	2.6623e-06	1.6598	1.33128e-06	1.10523	0.00138252	0.9991	0.0501658	1.05314	1	1.82505	6.46746e-07	2.85806	0.00849333	2.4321	0.00424699	1.57033	5.11347e-07	2.27644	0.027837	1.96616	0.0139188
ENSG00000066294	CD84	protein_coding	9255	-0.06512	NA	-3.18064	NA	-0.907583	1	0.651708	NA	-3.52662	NA	-0.270731	1	NA	NA	NA	NA	0	1	-1.54902	NA	-3.54255	NA	-2.2258	1
ENSG00000066322	ELOVL1	protein_coding	2507	0.0850537	0.959853	0.0991153	NA	0.0921016	1	-0.0244961	0.99129	-0.236132	NA	-0.126437	1	-0.507414	0.784731	0.896234	NA	0.358781	1	0.614465	0.59055	-1.50987	NA	-0.0876312	1
ENSG00000066336	SPI1	protein_coding	2069	0.775337	NA	-3.39073	NA	-0.146456	1	0.629622	NA	-2.05387	NA	-0.161656	1	2.22711	NA	-0.487418	NA	1.43169	1	0.474949	NA	-2.27115	NA	-0.324605	1
ENSG00000066379	ZNRD1	protein_coding	3672	-1.16208	0.447703	-2.17945	NA	-1.58288	1	0.177257	0.939646	-0.992805	NA	-0.292271	1	-0.389873	0.88917	-1.59325	NA	-0.869569	1	-0.696909	0.692917	1.23863	NA	0.573685	1
ENSG00000066382	MPPED2	protein_coding	8197	-0.635624	0.358506	-0.740555	0.618616	-0.687136	1	-1.77273	0.000853816	-1.38881	0.195802	-1.56803	1	-0.99181	0.00165439	0.445285	0.722042	-0.101266	1	-1.29743	3.25075e-05	-0.341908	0.821078	-0.741966	1
ENSG00000066405	CLDN18	protein_coding	3880	1.75126	NA	-1.37783	NA	0.907397	1	-0.505204	NA	-1.53274	NA	-0.929362	1	-0.726967	NA	NA	NA	0	1	1.32296	NA	-1.4327	NA	0.522168	1
ENSG00000066422	ZBTB11	protein_coding	7416	0.990056	0.016063	0.693286	0.471007	0.849289	1	0.720846	0.194962	1.20407	0.201045	0.982596	1	0.736233	0.0888897	0.793637	0.526636	0.76522	1	0.763053	0.026488	1.80205	0.129399	1.37413	1
ENSG00000066427	ATXN3	protein_coding	28202	-2.54889	5.15565e-13	-1.68058	0.0503649	-2.05037	1	-2.28972	9.63937e-09	-1.32011	0.126488	-1.72495	1	-2.68614	3.02758e-11	-1.79268	0.122432	-2.17132	1	-2.74227	3.04337e-22	-1.6566	0.11131	-2.09963	1
ENSG00000066455	GOLGA5	protein_coding	3295	2.01482	2.69302e-07	1.80228	0.0352067	1.91246	0.0176035	1.90437	1.08284e-05	2.8066	0.000514363	2.42489	0.000262596	2.54356	1.98853e-07	0.743454	0.57472	1.90775	1	2.63013	6.06405e-11	2.39669	0.0728145	2.51812	1
ENSG00000066468	FGFR2	protein_coding	7578	1.32705	0.000191355	0.954935	0.194058	1.15296	1	1.73407	2.43756e-05	2.23618	2.90312e-05	2.00686	2.67034e-05	0.800312	0.318548	2.20641	0.225435	1.66829	1	1.56106	0.000100762	3.87156	0.317762	3.13651	1
ENSG00000066557	LRRC40	protein_coding	2884	0.079341	0.880856	1.19692	0.238443	0.743744	1	-0.200131	0.793619	0.928314	0.441684	0.471719	1	-0.437248	0.361227	-0.0507376	0.974392	-0.231087	1	-0.442677	0.243223	-0.698266	0.510333	-0.564819	1
ENSG00000066583	ISOC1	protein_coding	1940	-0.623877	0.527465	0.835312	NA	0.282836	1	-0.499998	0.65731	2.49896	NA	1.669	1	-0.385803	0.794991	1.15727	NA	0.582892	1	-0.444187	0.647968	-0.567872	NA	-0.504704	1
ENSG00000066629	EML1	protein_coding	8899	1.4114	4.0168e-05	2.51996	0.00215073	2.06963	0.00109545	1.57891	0.0010565	1.59469	0.078854	1.58682	1	1.91985	4.64474e-07	1.62861	0.16303	1.78156	1	2.36715	2.73405e-12	2.14224	0.0463264	2.25907	0.0231632
ENSG00000066651	TRMT11	protein_coding	2690	-0.132607	0.856783	-0.0934831	0.957685	-0.112913	1	0.272286	0.751793	0.112133	0.941418	0.194431	1	-0.358133	0.692405	-0.934417	NA	-0.61769	1	-0.340251	0.619932	-0.135018	0.956779	-0.233988	1
ENSG00000066654	THUMPD1	protein_coding	6501	-1.21206	0.0119195	-0.535159	0.685023	-0.834269	1	-0.595201	0.350747	0.0799278	0.95694	-0.2185	1	-1.06638	0.0277296	-0.495447	0.76995	-0.752852	1	-0.46951	0.265925	1.97106	0.230471	1.21498	1
ENSG00000066697	MSANTD3	protein_coding	3253	-0.489273	0.507954	0.221989	NA	-0.0902464	1	-0.357294	0.744891	-0.838896	0.580972	-0.578092	1	-0.844709	0.230457	-2.03967	0.0814822	-1.32185	1	-0.347967	0.53078	-0.752709	0.65442	-0.536191	1
ENSG00000066735	KIF26A	protein_coding	6756	3.33733	1.89091e-24	2.54802	4.70798e-06	2.99599	2.35399e-06	3.87783	8.68693e-25	1.82816	4.39632e-05	3.18996	2.19816e-05	3.22001	1.57081e-31	1.9268	0.00318372	2.7137	0.00159186	3.35201	1.4456e-45	2.47185	0.000907978	2.97804	0.000453989
ENSG00000066739	ATG2B	protein_coding	14778	1.56434	2.71767e-09	2.30249	8.87601e-05	1.98012	4.43814e-05	1.15783	0.0018722	1.16004	0.0519494	1.15893	1	1.48046	1.8167e-07	0.858246	0.274332	1.20264	1	1.54268	2.63535e-11	1.49978	0.128534	1.52139	1
ENSG00000066777	ARFGEF1	protein_coding	10964	1.58495	5.09936e-12	1.69268	3.57806e-05	1.63982	1.78903e-05	1.43577	3.93025e-06	1.08093	0.0153682	1.26923	0.00768609	1.6459	1.23208e-14	0.129546	0.874839	1.0784	1	1.65233	4.24236e-19	0.561509	0.554768	1.20765	1
ENSG00000066813	ACSM2B	protein_coding	8158	NA	NA	NA	NA	0	1	NA	NA	NA	NA	0	1	NA	NA	NA	NA	0	1	1.04281	NA	-1.70133	NA	0.243509	1
ENSG00000066827	ZFAT	protein_coding	8900	2.45016	0.00933868	0.475834	NA	1.77726	1	2.08013	0.0441838	0.791996	0.670462	1.57529	1	2.19787	0.0225667	-1.30649	0.357958	1.31971	1	2.76674	0.000142996	3.116	NA	2.95191	1
ENSG00000066855	MTFR1	protein_coding	4629	-0.554148	0.52477	-0.182247	NA	-0.356247	1	0.153197	0.922318	1.05077	0.664983	0.670689	1	-0.950765	0.3675	-2.04111	NA	-1.39529	1	-1.04839	0.186694	-0.577671	NA	-0.793916	1
ENSG00000066923	STAG3	protein_coding	8583	2.16716	0.384295	0.294318	NA	1.51543	1	-1.9425	NA	-2.22416	NA	-2.07647	1	0.986614	NA	-1.52378	NA	0.219898	1	-0.826966	NA	-2.6352	NA	-1.46459	1
ENSG00000066926	FECH	protein_coding	4473	-0.182819	0.84916	1.57515	NA	0.948841	1	0.491903	0.789708	1.92286	NA	1.37797	1	0.324809	0.801983	-0.534847	NA	-0.041914	1	-0.133545	0.890395	-0.742009	NA	-0.405934	1
ENSG00000066933	MYO9A	protein_coding	20253	2.32313	8.1329e-19	2.22175	1.07647e-07	2.27333	5.38237e-08	1.89889	3.79458e-09	1.77438	8.25967e-05	1.83797	4.13002e-05	2.4362	4.35053e-26	1.28594	0.0415042	1.97279	0.0207521	2.56093	3.18594e-39	1.40757	0.0618968	2.09656	1
ENSG00000067048	DDX3Y	protein_coding	5738	0.272418	0.603714	-0.822477	0.427379	-0.173563	1	-0.0797534	0.940486	-0.0202266	0.996258	-0.049683	1	0.350684	0.517192	-1.29274	0.238727	-0.248674	1	0.405579	0.370898	-1.06737	0.489819	-0.150555	1
ENSG00000067057	PFKP	protein_coding	4836	0.994307	0.123692	0.866828	0.58809	0.931975	1	1.80564	0.0693741	1.17851	0.448068	1.52589	1	0.133327	0.911051	0.159127	NA	0.146285	1	1.39243	0.00479101	1.98506	0.249874	1.71896	1
ENSG00000067064	IDI1	protein_coding	3589	-1.2071	0.00905771	-0.176361	0.913221	-0.601571	1	-1.06059	0.0615136	-0.78081	0.427804	-0.913928	1	-1.35894	3.43598e-05	-0.453231	0.705548	-0.836148	1	-1.1401	0.000229066	0.351209	0.825212	-0.209765	1
ENSG00000067066	SP100	protein_coding	12618	-0.0143936	NA	-1.47167	NA	-0.56636	1	-0.493885	NA	-1.4643	NA	-0.898994	1	-0.331786	NA	-1.88397	NA	-0.908484	1	-0.23336	NA	-1.20076	NA	-0.637448	1
ENSG00000067082	KLF6	protein_coding	6139	-1.05773	0.0836841	0.0930782	0.966757	-0.370499	1	-1.28326	0.0934476	3.36277	NA	2.41927	1	-0.93174	0.0847256	1.93049	NA	1.11639	1	-0.935833	0.0200087	-0.395142	0.80225	-0.640305	1
ENSG00000067113	PLPP1	protein_coding	2016	-1.11999	0.326905	-1.87749	NA	-1.44959	1	-0.482978	0.782156	-0.223556	0.944077	-0.347444	1	-0.912191	0.577061	-2.09349	NA	-1.38517	1	-1.38668	0.191266	-2.63331	NA	-1.87933	1
ENSG00000067141	NEO1	protein_coding	8117	0.97903	1.90272e-05	1.11966	0.00645543	1.05106	0.00323723	1.35659	4.03792e-05	1.44154	0.00018677	1.39969	0.000113575	0.996225	2.50603e-05	0.502417	0.486548	0.770346	1	1.40673	4.08199e-12	1.13743	0.135957	1.27836	1
ENSG00000067167	TRAM1	protein_coding	3878	-1.76072	1.41115e-05	-0.901527	0.412492	-1.26809	1	-2.08759	7.98401e-07	-0.532814	0.678359	-1.11017	1	-2.43788	8.72307e-06	-0.261051	NA	-0.972797	1	-1.84847	2.74429e-07	-1.48273	0.208459	-1.65404	1
ENSG00000067177	PHKA1	protein_coding	6350	1.13927	0.0138805	0.671435	0.566008	0.924235	1	1.23751	0.0716019	1.99281	0.094794	1.66403	1	0.833878	0.410575	-0.159109	0.94664	0.421182	1	1.37995	0.0435493	1.25081	NA	1.31682	1
ENSG00000067182	TNFRSF1A	protein_coding	4005	0.414576	0.568777	0.597119	0.729367	0.508733	1	0.834222	0.354178	0.902144	0.539112	0.868583	1	1.06718	0.315926	2.63389	NA	2.05351	1	1.03451	0.175334	1.20001	NA	1.11963	1
ENSG00000067191	CACNB1	protein_coding	7094	-0.181407	0.864958	-1.30815	0.35317	-0.637467	1	-0.317692	0.785995	-0.895085	0.572719	-0.577694	1	0.517987	0.435202	0.482974	0.768949	0.500587	1	0.876051	0.0398384	0.692145	0.665739	0.787026	1
ENSG00000067208	EVI5	protein_coding	8276	-0.121375	0.808447	0.476509	0.654346	0.20832	1	-0.478267	0.367955	0.541329	0.621141	0.119789	1	0.176367	0.776452	0.721924	0.636001	0.474781	1	0.1506	0.740396	0.0908718	0.953999	0.121045	1
ENSG00000067221	STOML1	protein_coding	10461	1.01546	0.583166	0.121338	NA	0.636586	1	0.826908	0.65014	-0.525665	0.848766	0.303645	1	0.706054	0.584208	0.0896426	NA	0.430522	1	0.0430868	0.971051	-0.495534	NA	-0.201232	1
ENSG00000067225	PKM	protein_coding	8571	1.1943	2.72704e-06	0.301229	0.547184	0.815792	1	1.84164	8.75306e-07	1.32981	0.00161024	1.60831	0.000805556	1.52887	1.06729e-08	0.260431	0.782498	1.02979	1	1.75641	5.08269e-13	1.70315	0.041595	1.73003	0.0207975
ENSG00000067248	DHX29	protein_coding	4734	1.80392	9.94154e-08	1.08735	0.151475	1.48968	1	1.24558	0.0110255	1.44709	0.0867571	1.34985	1	1.77235	1.65583e-07	0.361614	0.726895	1.23296	1	2.13981	2.09849e-13	1.23568	0.326719	1.75744	1
ENSG00000067334	DNTTIP2	protein_coding	7519	2.62832	3.38648e-15	1.89992	0.00576601	2.30961	0.002883	2.10868	1.92349e-05	2.06565	0.00645023	2.08732	0.00323473	2.18765	6.85762e-10	0.97273	0.355932	1.70447	1	2.11807	1.07525e-12	1.10689	0.297708	1.69932	1
ENSG00000067365	METTL22	protein_coding	8254	-0.509135	0.484272	-0.812699	0.591859	-0.652947	1	-0.983029	0.240446	-1.75029	0.077446	-1.31624	1	-1.5448	0.0577106	-0.208564	NA	-0.727212	1	-1.27779	0.0468523	-1.2198	NA	-1.2485	1
ENSG00000067369	TP53BP1	protein_coding	12991	2.16746	1.80429e-27	2.34636	9.01687e-14	2.25968	4.50844e-14	1.78413	7.04329e-15	2.36427	3.34e-11	2.10317	1.67035e-11	2.0767	3.75455e-35	1.50288	0.000773565	1.81813	0.000386783	2.26288	1.64924e-52	1.84709	0.00668096	2.06992	0.00334048
ENSG00000067445	TRO	protein_coding	6716	1.879	1.71833e-12	1.48779	0.00515923	1.69661	0.00257961	1.77838	7.27092e-08	1.1336	0.0563749	1.49171	1	2.13969	9.80473e-17	0.720928	0.342873	1.59811	1	2.6062	7.74371e-35	0.906468	0.224321	1.99339	1
ENSG00000067533	RRP15	protein_coding	7883	-1.15673	0.010469	-0.700881	0.567265	-0.910876	1	-1.29845	0.024204	-0.289827	0.844655	-0.707734	1	-1.5767	0.000615833	0.269738	NA	-0.376285	1	-1.6825	2.49669e-05	-1.69829	0.165357	-1.69038	1
ENSG00000067560	RHOA	protein_coding	2582	-1.46239	2.42206e-06	-1.00914	0.126452	-1.21804	1	-1.12625	0.0108339	-1.16839	0.0441229	-1.14716	1	-1.03686	0.00347301	1.21699	0.460059	0.491594	1	-1.40558	5.36785e-07	0.635105	0.678958	-0.0510122	1
ENSG00000067596	DHX8	protein_coding	9302	2.92843	1.92785e-26	1.58273	0.00351031	2.4071	0.00175516	3.30435	1.4559e-18	2.41062	3.09372e-07	2.92562	1.54686e-07	2.96841	1.01679e-16	1.69082	0.045449	2.46665	0.0227245	3.00567	4.98319e-26	1.07284	0.240295	2.34129	1
ENSG00000067601	PMS2P4	transcribed_unprocessed_pseudogene	1060	-1.07863	NA	-1.10719	NA	-1.09284	1	-1.46384	0.612807	-0.851866	NA	-1.12564	1	0.711329	NA	-1.91824	NA	-0.0725678	1	-0.188759	NA	-0.524047	NA	-0.346684	1
ENSG00000067606	PRKCZ	protein_coding	7636	1.91586	0.00701553	2.1223	NA	2.02277	1	2.37417	0.037498	3.66842	0.121235	3.16181	1	2.09296	9.12053e-05	0.261723	0.875699	1.45025	1	2.72943	3.17343e-06	1.10624	0.455988	2.13501	1
ENSG00000067646	ZFY	protein_coding	5527	0.259578	0.713731	0.925147	0.576086	0.630408	1	-0.444929	0.686781	1.09981	0.587748	0.525009	1	-0.118826	0.877577	0.786496	0.694861	0.403713	1	-0.410091	0.424411	2.28414	NA	1.49142	1
ENSG00000067704	IARS2	protein_coding	4165	2.75679	7.23881e-20	2.44751	1.49758e-06	2.61042	7.48789e-07	2.97887	9.62857e-19	4.00303	5.59342e-14	3.57998	2.79676e-14	3.00769	2.05918e-17	1.95435	0.0226411	2.57509	0.0113206	3.32498	1.07735e-34	4.38885	3.85639e-06	3.95284	1.92819e-06
ENSG00000067715	SYT1	protein_coding	6494	-0.365769	0.444472	-0.549041	0.541919	-0.454497	1	-0.554133	0.230431	-0.536779	0.477144	-0.54543	1	-0.260548	0.358858	-1.40944	0.00778337	-0.72353	1	-0.240994	0.31636	-0.716488	0.353788	-0.459239	1
ENSG00000067798	NAV3	protein_coding	12135	2.34817	3.22159e-17	1.5451	0.0016074	2.00181	0.000803701	1.49	0.0255899	1.60336	0.168866	1.54779	1	2.57208	7.96963e-35	1.82794	0.000490792	2.24746	0.000245396	2.70832	1.64477e-25	2.43032	0.0178171	2.57601	0.00890854
ENSG00000067829	IDH3G	protein_coding	2717	1.37439	0.124864	0.15488	0.944749	0.889829	1	0.233187	0.859906	-0.541266	0.763961	-0.102685	1	-0.272474	0.82487	-1.92318	NA	-0.873593	1	0.45423	0.614723	-0.764703	NA	-0.0301581	1
ENSG00000067836	ROGDI	protein_coding	3683	0.232107	0.832589	0.685491	NA	0.476536	1	-0.018731	0.993441	-1.83783	0.222842	-0.658761	1	0.105307	0.90392	-1.1342	0.351492	-0.385232	1	0.0117113	0.991049	-0.252651	NA	-0.114423	1
ENSG00000067840	PDZD4	protein_coding	4341	3.24572	2.74992e-19	1.95249	0.00120799	2.7394	0.000603994	3.15266	2.48879e-11	1.4636	0.0238809	2.54237	0.0119404	2.14784	1.62711e-26	0.778217	0.182893	1.6198	1	2.69772	1.4768e-35	1.63725	0.0121025	2.26281	0.00605123
ENSG00000067842	ATP2B3	protein_coding	7534	2.98349	0.0380171	-2.32586	0.0739054	2.01942	1	5.18868	0.031407	-1.59381	0.329336	4.20173	1	1.01007	0.298685	-0.0174847	NA	0.585905	1	1.5062	0.195478	-1.59299	NA	0.665436	1
ENSG00000067900	ROCK1	protein_coding	11113	2.04779	3.41586e-16	1.96476	8.26218e-06	2.00688	4.13109e-06	2.19762	1.58236e-10	1.29839	0.00373948	1.81696	0.00186974	1.84944	1.43102e-13	0.215066	0.825492	1.25228	1	1.74761	5.17675e-14	0.460388	0.664603	1.24304	1
ENSG00000067955	CBFB	protein_coding	4129	-2.51537	8.47966e-10	-2.22283	0.00212207	-2.3617	1	-2.20522	4.57758e-05	-1.31984	0.219495	-1.69565	1	-2.08382	7.98766e-05	-1.02357	NA	-1.45841	1	-2.30867	1.74295e-06	-1.08506	NA	-1.57085	1
ENSG00000067992	PDK3	protein_coding	2695	1.35663	0.00627232	0.809757	0.515778	1.10895	1	1.3814	0.0416958	3.17797	0.0186362	2.54294	0.030166	0.78295	0.447284	-0.349162	NA	0.325205	1	0.694559	0.3416	1.87412	NA	1.40168	1
ENSG00000068001	HYAL2	protein_coding	4545	2.36876	1.7732e-07	1.03416	0.316841	1.85058	1	2.65952	1.0075e-05	1.45214	0.0841139	2.17861	1	1.5873	0.00584791	2.31862	NA	1.99881	1	2.45712	5.49389e-08	1.29754	0.271886	1.99083	1
ENSG00000068024	HDAC4	protein_coding	13368	0.864421	0.0456691	0.907768	0.344792	0.886257	1	0.491562	0.42216	0.582102	0.575917	0.537542	1	0.806791	0.0767259	1.59102	0.23242	1.25155	1	0.955381	0.004043	1.40972	0.240295	1.20037	1
ENSG00000068028	RASSF1	protein_coding	3683	-1.0599	0.455469	-0.842379	NA	-0.947042	1	-0.814752	0.536048	1.9844	NA	1.17808	1	-1.02053	0.493073	0.749075	NA	0.12012	1	-0.515164	0.629954	-0.271146	NA	-0.388002	1
ENSG00000068078	FGFR3	protein_coding	4834	1.47211	3.94483e-05	0.592826	0.510805	1.09844	1	2.23219	8.61421e-13	1.344	6.72752e-05	1.85539	3.36376e-05	1.43278	0.0415415	2.44305	NA	2.0246	1	1.92426	4.96329e-08	2.81061	0.0148581	2.43446	0.0074291
ENSG00000068079	IFI35	protein_coding	1973	-0.418468	NA	NA	NA	0	1	-0.820839	NA	-1.53274	NA	-1.13332	1	0.91005	NA	-0.907264	NA	0.270413	1	-0.778303	NA	NA	NA	0	1
ENSG00000068097	HEATR6	protein_coding	4868	2.12109	3.31615e-11	1.69394	0.0380189	1.92326	0.0190094	2.64049	2.39791e-08	1.41671	0.0290845	2.15465	0.0145423	1.85311	0.0001497	1.23161	0.342813	1.57557	1	2.33305	2.25922e-12	1.84703	0.0880158	2.11041	1
ENSG00000068120	COASY	protein_coding	4032	1.4032	0.0125609	0.839179	0.518003	1.14858	1	1.96077	0.00765811	0.326297	0.788522	1.36359	1	1.03037	0.244235	0.82982	NA	0.933575	1	1.72614	0.00158278	1.05963	0.581238	1.43104	1
ENSG00000068137	PLEKHH3	protein_coding	4803	1.77906	0.0120441	0.723234	0.673815	1.34565	1	1.97261	0.0245008	0.403595	0.811973	1.39165	1	2.18773	8.47831e-05	0.762955	0.641947	1.64452	1	2.13796	2.16802e-05	1.25922	0.405573	1.76448	1
ENSG00000068305	MEF2A	protein_coding	6925	-0.603952	0.164454	0.357734	0.77334	-0.0444188	1	-0.512709	0.395006	-0.3885	0.717579	-0.449269	1	0.260235	0.553412	1.32903	0.191809	0.891424	1	0.00736064	0.988233	0.681171	0.616692	0.383251	1
ENSG00000068308	OTUD5	protein_coding	3592	0.945054	0.04346	-0.601087	0.509716	0.369895	1	0.46951	0.516167	-0.291115	0.812676	0.138755	1	0.894807	0.0879173	0.0342792	0.983922	0.527774	1	0.823538	0.0540425	-0.569626	0.639706	0.288968	1
ENSG00000068323	TFE3	protein_coding	4283	0.125526	0.906179	-0.489699	NA	-0.149538	1	0.949064	0.398211	0.949528	0.6239	0.949296	1	0.289816	0.736732	0.634625	NA	0.472497	1	0.75526	0.217277	0.292884	0.878696	0.542517	1
ENSG00000068354	TBC1D25	protein_coding	4223	0.521006	0.632472	0.972186	NA	0.764162	1	1.14041	0.325419	-0.355194	0.857255	0.57831	1	1.02942	0.246185	0.0314678	NA	0.615064	1	1.01792	0.108654	1.25811	NA	1.14301	1
ENSG00000068366	ACSL4	protein_coding	6415	0.462139	0.211932	1.43743	0.102967	1.03068	1	1.10615	0.010221	2.83097	0.000201258	2.21229	0.00521114	0.264678	0.554197	1.21322	0.183042	0.815541	1	0.669781	0.0112636	1.06032	0.250167	0.878226	1
ENSG00000068383	INPP5A	protein_coding	3706	0.711501	0.261307	0.30235	0.847161	0.521382	1	-0.0615282	0.958529	-0.331312	0.845058	-0.190123	1	0.940076	0.160992	0.422596	NA	0.704414	1	1.21228	0.00910058	1.95554	0.229867	1.63126	1
ENSG00000068394	GPKOW	protein_coding	1742	1.33037	0.303821	0.109856	NA	0.845504	1	1.44793	0.331074	0.935375	NA	1.21429	1	0.760762	0.60716	0.305432	NA	0.550987	1	1.00346	0.283316	2.17064	NA	1.702	1
ENSG00000068400	GRIPAP1	protein_coding	6841	1.74253	6.1695e-07	0.959538	0.208084	1.40351	1	1.98393	1.27064e-06	0.98764	0.12468	1.57013	1	0.929005	0.00411694	-0.541421	0.524684	0.37354	1	1.26658	2.837e-06	0.149467	0.900218	0.81355	1
ENSG00000068438	FTSJ1	protein_coding	2872	0.0241259	0.985814	-0.775002	0.67706	-0.3208	1	0.319349	0.830521	-1.12994	0.441918	-0.230479	1	0.0262661	0.982443	-1.06208	NA	-0.417622	1	-1.05499	0.222732	-1.0618	NA	-1.05839	1
ENSG00000068489	PRR11	protein_coding	4080	-0.562909	0.4031	-0.542313	0.727487	-0.552574	1	-0.383572	0.750801	0.641244	0.791044	0.217982	1	-0.286366	0.839789	-0.7093	NA	-0.48239	1	0.135013	0.895193	2.34323	NA	1.62585	1
ENSG00000068615	REEP1	protein_coding	5380	-1.00456	0.475317	-0.374432	NA	-0.655363	1	-1.48036	0.492602	-1.75594	NA	-1.61158	1	-1.50827	6.19053e-05	-0.818958	0.550866	-1.12283	1	-0.791665	0.0413575	-0.129692	0.943872	-0.423039	1
ENSG00000068650	ATP11A	protein_coding	13733	1.27193	1.59545e-08	0.647001	0.137831	0.993039	1	1.51828	9.54951e-07	1.80664	2.30643e-05	1.66965	1.20096e-05	0.923468	0.00182643	0.643754	0.502415	0.790379	1	1.32995	1.05231e-07	2.28215	0.0115637	1.88322	0.00578189
ENSG00000068654	POLR1A	protein_coding	13519	2.02184	9.16005e-17	1.53244	0.00196415	1.79779	0.000982073	2.32997	3.316e-12	1.40528	0.00155402	1.94047	0.000777012	1.94829	1.34599e-13	0.973343	0.183042	1.54165	1	2.3394	1.23559e-21	2.0601	0.0100063	2.2065	0.00500316
ENSG00000068697	LAPTM4A	protein_coding	1946	-1.77589	8.63588e-07	-1.32156	0.087216	-1.53091	1	-1.21357	0.00913992	-0.545333	0.578765	-0.841103	1	-2.03097	0.00024493	-1.46677	NA	-1.72146	1	-1.28877	0.00104813	-0.54507	0.741632	-0.86952	1
ENSG00000068724	TTC7A	protein_coding	6949	1.10191	0.0812532	0.655112	0.676524	0.895736	1	1.45321	0.0708709	1.82073	0.20993	1.64864	1	-0.14707	0.896961	0.892725	NA	0.464544	1	0.571781	0.397068	-0.746077	0.641564	0.0583722	1
ENSG00000068745	IP6K2	protein_coding	5624	-0.322727	0.446432	-1.03453	0.0933375	-0.635167	1	-0.494153	0.308842	-0.846133	0.241566	-0.659435	1	-0.729665	0.0209914	-1.70564	0.00599269	-1.13665	1	-0.763255	0.00354148	-1.23806	0.16612	-0.981212	1
ENSG00000068781	STON1-GTF2A1L	protein_coding	4294	-2.31589	NA	NA	NA	0	1	0.109851	NA	-2.68843	NA	-0.696366	1	-0.690091	NA	NA	NA	0	1	0.329378	0.925727	-0.284569	NA	0.0548196	1
ENSG00000068784	SRBD1	protein_coding	5045	1.9765	9.94154e-08	1.59775	0.0433789	1.79952	0.0216895	1.45318	0.00200758	2.20951	0.008995	1.88035	0.00550129	2.03862	6.87732e-05	1.34796	0.329806	1.73423	1	1.96887	4.73609e-06	2.49301	0.0798434	2.25461	1
ENSG00000068796	KIF2A	protein_coding	4774	1.06826	0.000329334	1.00107	0.0711749	1.03506	1	1.63966	2.8416e-06	1.85765	5.67705e-05	1.75277	2.9806e-05	1.57833	1.8971e-10	0.555435	0.452027	1.1557	1	1.76498	1.92903e-18	1.26457	0.0990617	1.53636	1
ENSG00000068831	RASGRP2	protein_coding	6084	1.79271	0.391848	-0.614656	NA	1.04185	1	1.84209	0.529456	-1.76683	0.4004	0.95574	1	1.04478	0.593608	-0.186701	NA	0.556631	1	0.219355	0.90253	-1.3162	NA	-0.353096	1
ENSG00000068878	PSME4	protein_coding	10241	2.03003	6.0437e-17	2.04907	2.70307e-05	2.03958	1.35153e-05	1.72987	2.23777e-08	2.2882	4.36602e-10	2.03588	1.14071e-08	2.39035	2.45503e-25	1.51422	0.0239355	2.0178	0.0119677	2.38659	3.86247e-32	2.28637	0.0017978	2.33735	0.0008989
ENSG00000068885	IFT80	protein_coding	7175	-1.355	0.0125553	-0.0539882	0.978505	-0.562555	1	-1.37325	0.13165	1.65772	NA	0.824234	1	-0.644353	0.395282	0.421283	NA	-0.0153031	1	-1.2385	0.032703	0.596183	NA	-0.047275	1
ENSG00000068903	SIRT2	protein_coding	6224	0.538921	0.637435	-1.57637	0.289045	-0.161484	1	1.03532	0.367379	-1.01154	0.455683	0.347997	1	0.279103	0.762603	-0.414237	NA	-0.0263107	1	-0.0704888	0.934834	-1.00394	0.556802	-0.463001	1
ENSG00000068912	ERLEC1	protein_coding	2592	-0.16905	0.792595	0.396371	0.80787	0.141185	1	0.398059	0.592687	1.64603	0.180017	1.15298	1	0.514039	0.379898	-0.101704	0.952683	0.238771	1	0.504326	0.268444	-0.261629	0.857829	0.171595	1
ENSG00000068971	PPP2R5B	protein_coding	3376	1.86896	0.00878287	1.38756	0.411471	1.64825	1	1.51801	0.109688	0.230939	0.903135	1.01348	1	1.31999	0.00530095	1.06186	0.405081	1.19669	1	2.38985	2.72682e-09	-0.0762932	0.954553	1.62983	1
ENSG00000068976	PYGM	protein_coding	4981	3.19869	0.094299	-1.191	NA	2.26593	1	2.2941	0.135844	0.47406	NA	1.65386	1	0.0201882	NA	-1.27065	NA	-0.485435	1	1.02401	0.604102	0.908504	NA	0.967412	1
ENSG00000068985	PAGE1	protein_coding	665	NA	NA	NA	NA	0	1	0.474498	NA	-1.53274	NA	-0.205018	1	NA	NA	NA	NA	0	1	0.9398	NA	-1.81579	NA	0.139019	1
ENSG00000069011	PITX1	protein_coding	3511	3.09219	0.274773	-3.55926	NA	2.10647	1	2.75406	NA	-2.51075	NA	1.7911	1	0.273601	NA	-4.15983	NA	-0.661128	1	3.21759	NA	-2.36806	NA	2.24733	1
ENSG00000069018	TRPC7	protein_coding	3185	NA	NA	-3.26027	NA	0	1	-1.12667	0.793768	-2.05387	NA	-1.51703	1	0.692498	NA	-2.13417	NA	-0.117257	1	-0.84818	NA	NA	NA	0	1
ENSG00000069020	MAST4	protein_coding	14675	1.88624	7.09863e-06	0.885059	0.358716	1.47081	1	2.04795	0.000406397	2.13989	0.0190481	2.09465	0.00972725	2.15327	9.79699e-06	2.53527	0.0733148	2.35688	1	2.25367	6.88916e-10	1.46127	0.212358	1.9112	1
ENSG00000069122	ADGRF5	protein_coding	6650	NA	NA	-4.01442	NA	0	1	0.309205	NA	-2.21864	NA	-0.460103	1	NA	NA	NA	NA	0	1	0.9398	NA	-2.71865	NA	0.0497555	1
ENSG00000069188	SDK2	protein_coding	11607	1.65627	1.50436e-17	1.02743	0.0122189	1.37584	0.00610944	2.7497	7.7697e-17	1.89191	5.10224e-14	2.38364	2.555e-14	1.52783	1.23127e-08	2.11796	0.00477743	1.85286	0.00238872	1.71168	1.20365e-13	0.466225	0.61475	1.21937	1
ENSG00000069206	ADAM7	protein_coding	4483	2.86877	NA	-3.56659	NA	1.88534	1	3.41012	NA	-1.82366	NA	2.44796	1	2.77144	0.343384	1.24966	NA	2.20253	1	-0.229793	NA	-5.16417	NA	-1.18337	1
ENSG00000069248	NUP133	protein_coding	6080	1.96895	7.99255e-13	2.04907	0.000105027	2.00956	5.25136e-05	1.77324	4.70906e-07	2.46852	8.69423e-06	2.16237	4.58257e-06	1.90324	3.64546e-08	1.9643	0.0277496	1.93409	0.0138748	2.39669	2.06614e-21	2.11786	0.0371309	2.264	0.0185654
ENSG00000069275	NUCKS1	protein_coding	6546	-1.57586	8.90496e-13	-1.28138	4.96125e-05	-1.42112	1	-1.26404	2.35083e-06	-1.21842	0.000102779	-1.24105	1	-1.36767	1.37509e-11	-1.07742	0.0439637	-1.21526	1	-1.40808	2.61535e-14	-1.38024	0.0428761	-1.39409	1
ENSG00000069329	VPS35	protein_coding	9733	1.62916	5.57897e-11	1.47581	0.00130568	1.55452	0.000652841	1.72453	1.9499e-07	2.29369	1.34531e-06	2.037	7.70151e-07	1.19426	1.93727e-05	1.72925	0.0128818	1.48641	0.00645061	1.42773	1.27986e-10	1.36398	0.083666	1.39621	1
ENSG00000069345	DNAJA2	protein_coding	5065	0.430729	0.314029	0.945327	0.343964	0.710851	1	0.79335	0.132928	1.10748	0.140589	0.958947	1	0.378094	0.485781	-0.389576	0.760232	0.0447286	1	0.633137	0.091177	-0.179337	0.894857	0.283354	1
ENSG00000069399	BCL3	protein_coding	3242	-0.026432	0.99235	0.812891	NA	0.453425	1	0.288065	0.934398	0.374499	NA	0.331929	1	2.40541	NA	1.04562	NA	1.88012	1	0.709439	0.785197	0.613421	NA	0.662229	1
ENSG00000069424	KCNAB2	protein_coding	9534	-0.773706	0.513321	-2.40629	0.0946424	-1.37043	1	1.02621	0.498394	0.530842	0.830717	0.799686	1	0.315292	0.771629	0.65488	NA	0.495055	1	0.366383	0.691942	-0.411851	0.855488	0.0291174	1
ENSG00000069431	ABCC9	protein_coding	11616	0.391991	NA	-2.14221	NA	-0.378255	1	1.43498	0.508887	0.307541	NA	0.978702	1	0.372729	0.90463	-2.40771	NA	-0.431234	1	1.23696	0.509354	-1.24805	NA	0.474059	1
ENSG00000069482	GAL	protein_coding	1300	0.933659	NA	-1.40845	NA	0.19335	1	NA	NA	-3.21968	NA	0	1	NA	NA	NA	NA	0	1	0.915235	NA	-0.902574	NA	0.275488	1
ENSG00000069493	CLEC2D	protein_coding	6957	-2.96777	0.001122	-2.4202	NA	-2.66816	1	-2.68075	0.00629051	-2.07792	NA	-2.34808	1	-2.44345	0.0894853	0.182063	NA	-0.601267	1	-2.95197	0.00938242	-1.68306	NA	-2.18228	1
ENSG00000069509	FUNDC1	protein_coding	1399	-0.694543	0.635547	-0.626741	NA	-0.660244	1	-0.828954	0.679259	-0.00240678	NA	-0.35728	1	-1.52388	0.20585	0.385023	NA	-0.274364	1	-0.477511	0.68233	-0.918761	NA	-0.681331	1
ENSG00000069535	MAOB	protein_coding	2891	1.43691	0.58093	1.23214	NA	1.33816	1	-1.68762	NA	NA	NA	0	1	-0.866078	NA	-1.28656	NA	-1.06106	1	-0.747468	0.813626	-0.710245	NA	-0.728736	1
ENSG00000069667	RORA	protein_coding	17040	-2.43707	0.000288952	-0.713672	NA	-1.33202	1	-1.73088	0.00755201	-0.0307372	0.990327	-0.643643	1	-1.36319	0.0440303	-0.20488	NA	-0.67078	1	-1.52827	0.00536054	0.353508	NA	-0.300132	1
ENSG00000069696	DRD4	protein_coding	1477	0.82726	0.323851	0.972177	NA	0.901538	1	0.890818	0.500675	1.25405	0.605801	1.08383	1	1.72231	0.0603324	1.48225	NA	1.60727	1	0.616254	0.499212	1.29665	NA	0.996198	1
ENSG00000069702	TGFBR3	protein_coding	8705	-1.42074	0.303229	-1.9144	NA	-1.64656	1	0.181233	0.906895	-1.24903	0.40721	-0.363473	1	-0.463126	0.835358	-0.291802	NA	-0.374922	1	-0.356541	0.858566	-1.78611	NA	-0.901059	1
ENSG00000069712	KIAA1107	protein_coding	4631	NA	NA	NA	NA	0	1	NA	NA	NA	NA	0	1	NA	NA	NA	NA	0	1	NA	NA	NA	NA	0	1
ENSG00000069764	PLA2G10	protein_coding	1116	NA	NA	-3.26027	NA	0	1	1.77849	NA	-1.4629	NA	0.923506	1	1.48924	NA	-1.3335	NA	0.679969	1	1.04281	NA	-2.92194	NA	0.13237	1
ENSG00000069812	HES2	protein_coding	5407	1.68758	NA	-1.47167	NA	0.840658	1	-0.00840202	NA	-2.94631	NA	-0.831445	1	-1.49505	NA	NA	NA	0	1	1.02517	NA	-2.68956	NA	0.131069	1
ENSG00000069849	ATP1B3	protein_coding	2584	-1.11868	0.0196567	-0.404557	0.771435	-0.717876	1	-0.869261	0.381238	-1.15934	0.234334	-1.00702	1	-0.702413	0.202491	-0.872416	0.530573	-0.784912	1	-1.03762	0.0132678	-1.34904	0.240186	-1.18494	1
ENSG00000069869	NEDD4	protein_coding	9097	0.900977	0.083354	1.00664	0.406188	0.954776	1	1.11567	0.0293737	1.71616	0.040048	1.44694	0.0347108	1.46634	0.0468556	0.890812	NA	1.20709	1	1.45147	3.61897e-05	2.12367	0.072385	1.82637	1
ENSG00000069943	PIGB	protein_coding	4542	-0.890444	0.486426	-1.78001	NA	-1.26772	1	-0.915424	0.503705	-1.45982	0.41104	-1.16209	1	-0.680294	0.729104	-2.63614	NA	-1.34943	1	-0.883702	0.513626	1.82073	NA	1.02665	1
ENSG00000069956	MAPK6	protein_coding	6388	1.05307	0.00268054	2.3183	0.000184579	1.82016	0.00143256	1.03215	0.0177981	2.34181	0.000521173	1.83075	0.00915964	1.7668	1.09919e-09	3.4058	7.73519e-05	2.80752	3.86765e-05	1.56218	8.66822e-14	2.24872	0.00300345	1.94591	0.00150172
ENSG00000069966	GNB5	protein_coding	13302	-0.700005	0.274807	-0.6145	0.670597	-0.656619	1	-0.575437	0.52814	0.314631	0.886502	-0.0628243	1	-0.897128	0.0467801	1.94637	0.267248	1.13455	1	-0.840802	0.0228051	0.0164684	0.992246	-0.349407	1
ENSG00000069974	RAB27A	protein_coding	5605	-1.76141	0.141012	-1.16306	NA	-1.43144	1	-2.27479	0.133196	0.547582	NA	-0.261642	1	-2.2156	0.206149	-2.33855	NA	-2.27576	1	-2.2271	0.0670778	0.267128	NA	-0.497163	1
ENSG00000069998	HDHD5	protein_coding	4936	0.701306	0.327872	1.29723	NA	1.02982	1	1.44449	0.133196	1.75716	0.334955	1.60928	1	0.831722	0.450362	0.989512	NA	0.912773	1	0.99189	0.265658	-0.880347	0.631126	0.340292	1
ENSG00000070010	UFD1	protein_coding	8736	-1.31765	0.21274	-0.63628	NA	-0.937107	1	0.36461	0.831589	2.51961	NA	1.81184	1	-0.0357941	0.980143	0.89944	NA	0.506316	1	0.172684	0.872981	2.19469	NA	1.51225	1
ENSG00000070018	LRP6	protein_coding	10337	1.57484	4.84689e-16	1.91696	8.67339e-09	1.75602	4.3367e-09	1.64635	1.85642e-12	2.04486	4.65547e-11	1.85932	2.42056e-11	0.872766	0.000387285	1.02973	0.0842551	0.953382	1	1.06953	7.69785e-07	1.98806	0.0255519	1.60069	0.0127763
ENSG00000070019	GUCY2C	protein_coding	4177	-0.872234	NA	-3.26027	NA	-1.62001	1	0.381678	NA	-2.08512	NA	-0.378446	1	0.56728	NA	-1.26744	NA	-0.0761862	1	1.32296	NA	-2.20133	NA	0.443195	1
ENSG00000070031	SCT	protein_coding	366	NA	NA	NA	NA	0	1	NA	NA	NA	NA	0	1	-0.319659	NA	NA	NA	0	1	NA	NA	NA	NA	0	1
ENSG00000070047	PHRF1	protein_coding	5769	2.47513	2.16982e-18	1.60721	0.00316377	2.10547	0.00158189	2.25655	1.26958e-08	0.511069	0.395105	1.6331	1	2.65669	5.15114e-19	1.26802	0.109937	2.12336	1	2.95233	1.13759e-26	0.77263	0.385769	2.24006	1
ENSG00000070061	ELP1	protein_coding	6048	2.37309	1.93619e-17	2.30469	1.83043e-05	2.3393	9.15214e-06	2.09061	7.18254e-09	1.56416	0.00242914	1.85127	0.00121457	2.27772	6.41601e-15	0.957703	0.196192	1.76369	1	2.51652	1.40692e-26	1.80306	0.0510127	2.20345	1
ENSG00000070081	NUCB2	protein_coding	8995	-0.268738	0.697533	-0.962861	0.392034	-0.57445	1	-0.214443	0.820798	-1.3926	0.0963026	-0.686457	1	-0.537076	0.341984	-1.40786	0.156259	-0.907743	1	-0.579836	0.249988	-1.06807	0.489024	-0.803397	1
ENSG00000070087	PFN2	protein_coding	3440	-2.07607	1.35095e-13	-1.55787	0.00466691	-1.79383	1	-1.7137	2.17858e-06	-1.67468	0.00241231	-1.69406	1	-1.84806	7.29056e-11	-0.47624	0.679244	-1.00489	1	-1.6362	6.98728e-10	-1.03185	0.267966	-1.30261	1
ENSG00000070159	PTPN3	protein_coding	9995	0.022279	0.970878	1.38033	0.230759	0.855526	1	-0.163277	0.825153	0.377872	0.736729	0.132523	1	0.632169	0.685806	1.13686	NA	0.906473	1	0.364868	0.751915	-0.122105	NA	0.141831	1
ENSG00000070182	SPTB	protein_coding	14772	3.05952	0.045214	-1.43528	NA	2.12213	1	3.91639	0.0918212	-1.12893	0.602993	2.95943	1	3.88188	1.75235e-11	3.34666	0.0244313	3.63895	0.0122156	3.26579	0.00114738	1.46993	NA	2.63093	1
ENSG00000070190	DAPP1	protein_coding	4548	1.67809	NA	-1.47787	NA	0.831499	1	-1.3286	NA	-3.21968	NA	-1.98422	1	-0.463922	NA	-2.13417	NA	-1.06974	1	0.0475709	NA	-1.81579	NA	-0.602117	1
ENSG00000070193	FGF10	protein_coding	3011	3.61215	NA	-0.324111	NA	2.70344	1	-0.591418	NA	-3.36529	NA	-1.39454	1	3.01827	NA	-3.31471	NA	2.03605	1	0.0177412	0.995433	-2.101	NA	-0.683309	1
ENSG00000070214	SLC44A1	protein_coding	12172	-1.24952	0.000617971	-0.239762	0.8493	-0.658044	1	-1.00964	0.0215465	0.38175	0.757279	-0.152332	1	-1.5215	0.00435373	1.36983	NA	0.552244	1	-1.53715	0.00094184	-0.700476	0.667072	-1.05899	1
ENSG00000070269	TMEM260	protein_coding	8077	-2.02007	0.000795492	-2.04656	0.0849414	-2.03325	1	-1.11405	0.149379	-1.0036	0.536632	-1.05777	1	-1.35061	0.0426248	-1.08896	NA	-1.21386	1	-1.12974	0.0443454	-0.598654	0.771525	-0.839898	1
ENSG00000070366	SMG6	protein_coding	10554	2.84068	5.80027e-36	2.3995	3.57458e-09	2.63689	1.78729e-09	2.4674	7.29114e-16	1.93222	4.01506e-06	2.22448	2.00753e-06	2.76978	5.87079e-26	2.97023	4.45124e-05	2.87348	2.22562e-05	3.04376	1.22861e-44	3.13035	0.000110774	3.08771	5.53868e-05
ENSG00000070367	EXOC5	protein_coding	12575	-0.133517	0.731499	1.07164	0.0654993	0.591403	1	0.2347	0.574896	1.18475	0.0185206	0.786555	1	-0.311901	0.282695	1.70009	0.0173812	1.01963	1	-0.0949987	0.705486	0.946756	0.232483	0.517934	1
ENSG00000070371	CLTCL1	protein_coding	10049	1.64245	0.00463387	1.3024	0.361693	1.48242	1	2.23063	0.0295628	1.09373	0.516727	1.77138	1	0.621719	0.508703	-0.743081	NA	0.095026	1	1.45684	0.00754392	1.86715	0.310175	1.67653	1
ENSG00000070388	FGF22	protein_coding	2778	-0.441682	NA	NA	NA	0	1	1.31001	NA	-0.686071	NA	0.632719	1	-0.726967	NA	-3.0458	NA	-1.46342	1	1.40156	NA	-1.36629	NA	0.599207	1
ENSG00000070404	FSTL3	protein_coding	3067	-0.0472194	0.980337	0.434623	NA	0.213725	1	-0.342769	0.89089	-0.730185	NA	-0.523511	1	-0.992442	0.607916	-1.25627	NA	-1.11833	1	-0.0444292	0.977203	-0.561493	NA	-0.27992	1
ENSG00000070413	DGCR2	protein_coding	5605	0.74643	0.0602656	1.30121	0.151138	1.05033	1	1.41213	0.00266579	0.196295	0.838773	0.928675	1	0.998434	0.00818212	2.26939	0.0333225	1.76957	0.0207523	0.927842	0.00294678	-0.121558	0.923888	0.496525	1
ENSG00000070423	RNF126	protein_coding	3496	0.601649	0.504221	0.625553	NA	0.61365	1	1.21543	0.430519	-0.174543	0.945977	0.681741	1	0.851752	0.412573	0.725372	NA	0.789946	1	1.24361	0.105879	1.50584	NA	1.38067	1
ENSG00000070444	MNT	protein_coding	8728	0.649353	0.219188	0.739067	0.526202	0.694908	1	0.394384	0.617341	-0.954296	0.283039	-0.127782	1	0.826603	0.0443725	0.00210022	0.998894	0.472467	1	0.814949	0.0268233	0.705845	0.559949	0.761428	1
ENSG00000070476	ZXDC	protein_coding	7357	1.67538	2.96194e-05	1.24841	0.188522	1.47763	1	1.87107	0.000118379	1.05837	0.209948	1.5212	1	1.90679	4.10565e-06	0.958874	0.381252	1.50932	1	1.97803	1.51873e-07	1.90981	0.0844566	1.94432	1
ENSG00000070495	JMJD6	protein_coding	5969	0.118718	0.918604	1.12016	NA	0.70464	1	0.00591884	0.996591	-0.0570734	0.979304	-0.0252335	1	-0.754836	0.361901	-0.367781	NA	-0.548367	1	-0.816507	0.214276	-0.937252	0.591061	-0.875617	1
ENSG00000070501	POLB	protein_coding	4106	-0.863207	0.202103	-0.273847	NA	-0.538639	1	-0.690418	0.495846	-0.21295	0.928919	-0.432021	1	-0.112102	0.894223	-0.441486	0.797317	-0.267414	1	-0.5551	0.307052	0.0167848	0.992711	-0.241004	1
ENSG00000070526	ST6GALNAC1	protein_coding	3448	0.812987	NA	-2.32466	NA	-0.0317491	1	NA	NA	-3.21968	NA	0	1	NA	NA	NA	NA	0	1	NA	NA	-3.54255	NA	0	1
ENSG00000070540	WIPI1	protein_coding	3402	0.427613	0.728536	-0.116128	NA	0.181209	1	0.970583	0.402472	0.234068	0.91399	0.648824	1	0.747838	0.673227	-0.800059	NA	0.172232	1	2.36287	0.0320719	2.17891	NA	2.27382	1
ENSG00000070601	FRMPD1	protein_coding	5867	1.88814	0.386766	0.388812	NA	1.32507	1	2.80096	NA	-1.02079	NA	1.89954	1	3.13449	NA	-0.058455	NA	2.2842	1	3.76684	NA	-1.22346	NA	2.81153	1
ENSG00000070610	GBA2	protein_coding	4803	2.23028	6.87026e-15	2.14057	0.000721417	2.18613	0.000360708	2.73386	1.06454e-09	1.45814	0.0182207	2.23264	0.00911036	2.06377	1.96095e-12	0.514734	0.544395	1.48787	1	2.70866	8.72064e-19	0.398459	0.692254	1.97366	1
ENSG00000070614	NDST1	protein_coding	9529	0.710224	0.0218634	1.15673	0.0717721	0.950685	1	0.738747	0.0875936	0.493213	0.453309	0.621197	1	1.03179	0.000200791	1.54662	0.0600504	1.31205	1	1.16971	2.61869e-06	0.744531	0.433391	0.972727	1
ENSG00000070669	ASNS	protein_coding	4455	-2.15007	0.428133	-1.98329	NA	-2.06427	1	-3.61317	0.0961447	-2.77979	NA	-3.13713	1	-0.345569	0.852472	-1.15205	NA	-0.693174	1	-0.239767	0.866266	2.38405	NA	1.60096	1
ENSG00000070718	AP3M2	protein_coding	6276	-0.632898	0.341017	-0.991121	0.418598	-0.800919	1	-0.939891	0.306451	-0.485704	0.798197	-0.694997	1	-0.829523	0.238563	0.48617	NA	-0.026619	1	-1.23566	0.0237277	-0.391862	NA	-0.752933	1
ENSG00000070729	CNGB1	protein_coding	7298	1.87254	0.0603818	0.150688	NA	1.25456	1	1.64612	0.423297	-0.730868	NA	0.900124	1	0.753153	0.21223	-1.49717	0.159828	0.0283713	1	0.0766481	0.927838	-0.796452	0.664546	-0.294837	1
ENSG00000070731	ST6GALNAC2	protein_coding	3098	-0.0262819	NA	-3.15827	NA	-0.87044	1	-0.241641	NA	-1.15772	NA	-0.628157	1	NA	NA	-2.93637	NA	0	1	-0.84818	NA	NA	NA	0	1
ENSG00000070748	CHAT	protein_coding	3750	-0.0875248	NA	NA	NA	0	1	-0.505204	NA	-2.74038	NA	-1.22734	1	-0.726967	NA	-3.83135	NA	-1.56827	1	-0.778303	NA	NA	NA	0	1
ENSG00000070756	PABPC1	protein_coding	4752	-0.586043	0.131116	-0.145469	0.809788	-0.349003	1	-0.245056	0.739165	-0.154452	0.795739	-0.199043	1	0.410542	0.230904	1.55345	0.118282	1.09233	1	0.180573	0.620448	0.810429	0.526712	0.529604	1
ENSG00000070759	TESK2	protein_coding	3322	1.5824	0.4258	-0.637549	NA	0.862942	1	-0.749099	0.715781	0.31261	NA	-0.122706	1	0.623767	NA	-0.475317	NA	0.176451	1	-1.77	0.562609	-3.10794	NA	-2.28913	1
ENSG00000070761	CFAP20	protein_coding	2375	-0.433834	0.61515	0.0966759	NA	-0.14433	1	0.0303011	0.982487	0.175982	0.941187	0.104979	1	0.252406	0.842682	-0.774129	NA	-0.171422	1	0.435478	0.571995	-0.207139	NA	0.149658	1
ENSG00000070770	CSNK2A2	protein_coding	6905	1.35599	0.00185484	0.893175	0.385466	1.14306	1	1.22071	0.0458885	0.843879	0.433666	1.04456	1	2.13592	9.12053e-05	0.929167	0.538167	1.65521	1	1.93587	0.000184135	1.74193	0.266428	1.84216	1
ENSG00000070778	PTPN21	protein_coding	7396	1.55812	2.39581e-06	1.38747	0.0564163	1.47532	1	0.884056	0.0967459	0.760301	0.413478	0.823505	1	1.25811	0.00301346	2.64482	0.0489886	2.11203	0.026001	1.65417	1.8888e-09	1.12564	0.231471	1.41398	1
ENSG00000070785	EIF2B3	protein_coding	3411	0.547396	0.595379	1.74937	NA	1.2701	1	1.87033	0.0502062	1.6203	0.332377	1.75072	1	-0.210383	0.902832	-1.11406	NA	-0.592594	1	1.5279	0.124878	-0.240223	NA	0.899281	1
ENSG00000070808	CAMK2A	protein_coding	6150	-1.48487	0.3768	-1.68847	NA	-1.58308	1	-0.818664	0.718757	-2.01129	NA	-1.2951	1	-0.42751	0.432469	-1.16414	0.262301	-0.749313	1	-0.42249	0.415005	-1.30515	0.260272	-0.797343	1
ENSG00000070814	TCOF1	protein_coding	11278	2.36433	2.4317e-15	0.890628	0.187353	1.808	1	3.04885	3.64857e-11	2.37897	0.000710116	2.75245	0.000355058	2.42936	4.3383e-11	0.603737	0.579434	1.78789	1	2.60213	7.52118e-14	1.41341	0.216818	2.12689	1
ENSG00000070831	CDC42	protein_coding	3598	-1.93359	3.08726e-08	-1.78861	0.0202469	-1.85928	1	-1.7766	2.64462e-05	0.0677457	0.966986	-0.577822	1	-2.3502	6.91274e-14	-1.63081	0.08918	-1.94612	1	-1.87264	1.75848e-12	-0.0715284	0.964644	-0.707569	1
ENSG00000070882	OSBPL3	protein_coding	8100	0.699314	0.231524	0.557368	0.717823	0.630086	1	0.226189	0.874733	0.473647	0.824802	0.355217	1	0.963935	0.416443	1.31702	NA	1.15125	1	0.345334	0.665903	4.08089	NA	3.18532	1
ENSG00000070886	EPHA8	protein_coding	5358	4.3623	0.0501527	0.785969	NA	3.47845	1	0.117557	NA	0.254557	NA	0.187682	1	0.980254	NA	-1.47792	NA	0.221455	1	1.96517	0.17057	-0.651153	NA	1.18312	1
ENSG00000070915	SLC12A3	protein_coding	6180	NA	NA	-4.01442	NA	0	1	0.831559	NA	-1.09599	NA	0.168271	1	2.64105	NA	-1.19411	NA	1.73875	1	-2.68194	NA	NA	NA	0	1
ENSG00000070950	RAD18	protein_coding	6983	-1.45953	0.00237467	0.165109	0.937984	-0.429671	1	-1.0972	0.174741	0.268836	0.91399	-0.258202	1	-1.4707	0.0600723	-0.246445	NA	-0.732431	1	-1.77388	0.000657009	-0.63737	NA	-1.09649	1
ENSG00000070961	ATP2B1	protein_coding	9493	0.831952	0.00628553	1.53343	0.00105533	1.22491	0.00367043	1.18159	0.000202964	2.05204	5.47616e-06	1.68149	0.00010422	1.17469	6.94996e-07	0.405306	0.59453	0.840689	1	1.11295	2.9335e-08	0.85311	0.384592	0.988875	1
ENSG00000070985	TRPM5	protein_coding	3962	-0.0262819	NA	NA	NA	0	1	-1.96322	NA	-2.38871	NA	-2.16033	1	-0.349544	NA	NA	NA	0	1	-1.45025	NA	NA	NA	0	1
ENSG00000071051	NCK2	protein_coding	2990	0.843781	0.133041	-0.740941	0.438245	0.258879	1	1.68884	0.00992926	0.516388	0.652684	1.21858	1	0.421992	0.433754	-0.954707	0.334526	-0.108019	1	0.741613	0.0907219	-0.529536	0.678958	0.241731	1
ENSG00000071054	MAP4K4	protein_coding	11961	2.44633	3.61821e-34	1.66331	5.50906e-09	2.10731	2.75453e-09	2.12591	1.39961e-16	1.90598	2.07864e-13	2.02013	1.04002e-13	2.26426	4.18001e-38	1.22798	0.00625341	1.83723	0.0031267	2.50025	9.08549e-52	1.59609	0.01173	2.11787	0.00586502
ENSG00000071073	MGAT4A	protein_coding	9630	-0.494126	0.520046	0.80234	NA	0.295087	1	-0.81802	0.435378	-0.809935	0.642636	-0.813972	1	-0.282526	0.55459	0.263698	0.862791	0.0162842	1	-0.500405	0.189687	0.037599	0.981825	-0.206468	1
ENSG00000071082	RPL31	protein_coding	5791	-1.83601	8.32853e-08	-2.29023	3.29022e-05	-2.04532	1	-1.59949	0.00012631	-1.61824	0.0122589	-1.60884	1	-1.0683	0.0277768	-1.41301	0.170972	-1.23038	1	-1.23936	0.00369067	-1.64538	0.122218	-1.42813	1
ENSG00000071127	WDR1	protein_coding	7827	1.18681	2.10093e-05	1.05227	0.109449	1.12111	1	2.10983	5.60719e-06	1.99849	0.000185684	2.05523	9.56458e-05	1.44828	0.000145977	0.792977	0.541876	1.15752	1	1.563	1.96664e-06	1.88538	0.0910793	1.73317	1
ENSG00000071189	SNX13	protein_coding	16418	0.0745714	0.857581	0.649557	0.343838	0.390522	1	-0.560342	0.210214	-0.127207	0.895569	-0.32758	1	0.0607492	0.895393	0.807716	0.376126	0.482046	1	-0.0929174	0.800739	0.979477	0.342932	0.54071	1
ENSG00000071203	MS4A12	protein_coding	1839	NA	NA	NA	NA	0	1	NA	NA	NA	NA	0	1	NA	NA	NA	NA	0	1	NA	NA	NA	NA	0	1
ENSG00000071205	ARHGAP10	protein_coding	10759	1.07044	0.395713	0.688357	NA	0.892008	1	0.719215	0.729363	2.87553	NA	2.16752	1	0.841723	0.636355	-0.834246	NA	0.234541	1	1.01576	0.493366	-0.0557567	NA	0.577278	1
ENSG00000071242	RPS6KA2	protein_coding	8243	1.69278	2.73218e-07	1.24997	0.0928207	1.4883	1	1.58618	0.000969668	1.07039	0.175021	1.35121	1	1.87811	4.7297e-10	1.35162	0.0999052	1.63875	1	2.33906	1.28822e-16	1.70862	0.0279908	2.05801	0.0139954
ENSG00000071243	ING3	protein_coding	5214	-0.516873	0.547149	1.47722	NA	0.800329	1	-1.5644	0.0785103	-0.379483	NA	-0.853565	1	-1.07119	0.275182	-1.12333	NA	-1.09703	1	-0.892536	0.193405	-1.09517	0.534125	-0.990297	1
ENSG00000071246	VASH1	protein_coding	6502	1.59043	3.12675e-05	0.729358	0.459078	1.22321	1	1.15109	0.0682238	0.218429	0.853784	0.758848	1	0.518881	0.180785	0.788157	0.453101	0.659793	1	1.21461	7.04969e-05	0.261387	0.82232	0.815334	1
ENSG00000071282	LMCD1	protein_coding	9130	-0.714306	0.638228	-0.90234	NA	-0.805262	1	0.0931535	0.977013	0.911415	NA	0.559535	1	-0.833238	0.736765	-0.0316454	NA	-0.377471	1	-0.244258	0.867254	1.51978	NA	0.89209	1
ENSG00000071462	BUD23	protein_coding	7944	-0.743776	0.459292	0.742911	NA	0.183152	1	0.518207	0.753315	1.54123	NA	1.11856	1	-0.625435	0.675697	-2.27604	NA	-1.22653	1	-1.10793	0.351462	-0.0750897	NA	-0.50099	1
ENSG00000071537	SEL1L	protein_coding	9559	-0.758821	0.0227908	-0.0259573	0.978911	-0.346346	1	-0.283066	0.630631	-0.0160543	0.986472	-0.143391	1	-1.02292	0.00218834	-0.911633	0.331844	-0.966204	1	-0.551691	0.0818023	0.478388	0.6977	0.0533939	1
ENSG00000071539	TRIP13	protein_coding	3560	0.523298	0.497354	0.662689	0.727893	0.594677	1	0.383586	0.805645	3.02362	NA	2.23827	1	0.432091	0.812836	2.14653	NA	1.53027	1	0.397753	0.786062	1.60313	NA	1.12283	1
ENSG00000071553	ATP6AP1	protein_coding	4884	-0.389037	0.560119	-0.265769	0.875169	-0.326087	1	0.177358	0.855681	-0.231869	0.86464	-0.0127939	1	-0.605258	0.312991	0.296077	0.883526	-0.0853168	1	0.0233719	0.969455	-0.692549	0.590075	-0.290628	1
ENSG00000071564	TCF3	protein_coding	6080	0.58491	0.0445185	-0.578082	0.293694	0.117562	1	0.758775	0.0916722	-0.430183	0.393399	0.28346	1	0.47779	0.261007	0.177079	0.897133	0.335256	1	0.72055	0.0181139	0.250294	0.833209	0.504498	1
ENSG00000071575	TRIB2	protein_coding	4588	-0.215399	0.637225	-0.0433046	0.969373	-0.126787	1	0.24399	0.718774	0.55249	0.615	0.406471	1	0.286709	0.405327	0.546136	0.538167	0.422246	1	0.228784	0.417865	-0.324118	0.744316	-0.0213404	1
ENSG00000071626	DAZAP1	protein_coding	9201	-0.760312	0.096322	0.0769206	0.960177	-0.281796	1	-0.0966563	0.910809	-0.450327	0.676858	-0.262681	1	-0.595072	0.278401	-0.579491	0.691948	-0.58726	1	-0.26052	0.627876	0.278745	0.889622	0.0341641	1
ENSG00000071655	MBD3	protein_coding	7845	1.51718	0.0020329	1.95207	0.0950215	1.75095	1	1.74272	0.0542349	0.72485	0.606039	1.32175	1	1.26109	0.00288947	1.12599	0.342319	1.19512	1	1.58714	6.23263e-06	0.206744	0.882242	1.0561	1
ENSG00000071677	PRLH	protein_coding	264	3.71106	NA	-0.359073	NA	2.79449	1	3.05208	NA	0.753616	NA	2.31905	1	NA	NA	-3.83135	NA	0	1	NA	NA	-4.35329	NA	0	1
ENSG00000071794	HLTF	protein_coding	6024	0.824229	0.00551101	1.38932	0.0165968	1.13427	0.0110539	0.501758	0.285634	1.18993	0.0374185	0.886492	1	0.42118	0.194608	0.147535	0.888423	0.290836	1	0.682394	0.00707977	0.510883	0.613574	0.599186	1
ENSG00000071859	FAM50A	protein_coding	2567	1.19343	0.0969919	-0.99271	0.370648	0.480005	1	0.634811	0.60121	-0.792755	0.58456	0.0908365	1	0.639659	0.415385	-1.51747	0.159828	-0.0684996	1	0.675913	0.307757	-0.159344	0.944591	0.317906	1
ENSG00000071889	FAM3A	protein_coding	5098	0.683287	0.5527	0.112871	NA	0.426089	1	1.10763	0.513945	-1.46072	0.324568	0.332407	1	0.647952	0.621538	0.429696	NA	0.542947	1	0.468483	0.691997	-1.68871	NA	-0.239687	1
ENSG00000071894	CPSF1	protein_coding	6072	2.69899	4.46203e-27	2.25942	6.51867e-06	2.49588	3.25933e-06	3.39379	7.63214e-22	2.58431	1.26692e-09	3.04509	6.33459e-10	2.17829	2.35899e-12	1.5872	0.0605372	1.9128	1	2.60339	3.56563e-14	1.50483	0.0755584	2.15624	1
ENSG00000071909	MYO3B	protein_coding	8236	-0.167103	0.959147	-3.21502	NA	-1.00242	1	1.89513	0.537355	0.106442	NA	1.26187	1	1.276	NA	-0.227303	NA	0.711886	1	2.27328	0.145395	1.06802	NA	1.79302	1
ENSG00000071967	CYBRD1	protein_coding	5176	-3.29299	0.00167632	-3.11045	NA	-3.19884	1	-2.14255	0.134486	0.0356617	NA	-0.676334	1	-2.30029	0.250434	-0.976146	NA	-1.49135	1	-2.58374	0.127957	-2.01216	NA	-2.26983	1
ENSG00000071991	CDH19	protein_coding	6864	3.12486	NA	0.00732665	NA	2.28219	1	-1.04371	NA	-1.4643	NA	-1.23873	1	0.379522	NA	-0.87613	NA	-0.115803	1	-0.777613	NA	-2.65175	NA	-1.42962	1
ENSG00000071994	PDCD2	protein_coding	6476	-1.21617	0.0290668	-0.605843	0.700364	-0.878971	1	-1.65002	0.0160571	-1.49521	0.190633	-1.57054	1	-0.728444	0.313614	-0.536062	NA	-0.629049	1	-0.831548	0.0882112	1.50178	NA	0.762925	1
ENSG00000072041	SLC6A15	protein_coding	8781	-1.32504	0.00909524	-1.1243	0.384013	-1.22118	1	-0.556876	0.583102	-1.67566	0.064696	-1.01043	1	-1.74955	0.000733789	-2.1096	0.0754735	-1.91837	1	-1.15448	0.00257576	-0.814383	0.548713	-0.974435	1
ENSG00000072042	RDH11	protein_coding	5518	-1.07709	0.0769706	1.64045	NA	0.844631	1	-1.47325	0.0355824	-1.41037	0.198083	-1.44147	1	-2.0502	0.00033375	-0.224027	NA	-0.865619	1	-1.22238	0.00925887	-0.868045	0.577077	-1.03436	1
ENSG00000072062	PRKACA	protein_coding	6144	0.662081	0.160506	0.217344	0.857997	0.456782	1	1.02214	0.0905527	0.401702	0.707854	0.745022	1	0.0785139	0.904046	-0.192657	0.897133	-0.0507097	1	0.405049	0.256155	-0.303048	0.811166	0.0940145	1
ENSG00000072071	ADGRL1	protein_coding	8487	1.74862	6.99059e-14	1.38857	0.00173806	1.5798	0.000869028	2.42757	6.57099e-15	1.58129	4.99078e-05	2.06561	2.49539e-05	1.72497	6.18159e-19	1.91486	0.00255974	1.82304	0.00127987	2.19861	2.23439e-27	1.19168	0.0824049	1.78127	1
ENSG00000072080	SPP2	protein_coding	1265	-0.06512	NA	NA	NA	0	1	0.474498	NA	-3.22189	NA	-0.418297	1	1.45133	NA	-1.26744	NA	0.655353	1	NA	NA	NA	NA	0	1
ENSG00000072110	ACTN1	protein_coding	10626	2.39102	5.65596e-15	1.25902	0.02362	1.93331	0.01181	2.46397	4.01351e-09	1.11755	0.063893	1.94244	1	1.61995	4.43666e-05	1.02319	0.453101	1.35221	1	2.32702	3.51319e-15	2.06618	0.0174747	2.20249	0.00873734
ENSG00000072121	ZFYVE26	protein_coding	15706	2.29034	3.95418e-16	2.43523	4.82602e-05	2.3646	2.41301e-05	2.58566	1.17835e-08	2.29187	0.000126103	2.44623	6.30574e-05	2.29757	2.26221e-15	1.44233	0.103528	1.93242	1	2.87004	1.52227e-24	2.14602	0.00811528	2.55298	0.00405764
ENSG00000072133	RPS6KA6	protein_coding	8502	0.280183	0.578648	0.761168	0.491773	0.540628	1	0.250648	0.67028	0.360159	0.704619	0.306442	1	0.404197	0.36468	2.6815	0.0390846	1.95207	1	0.279852	0.380814	0.710089	0.490107	0.51095	1
ENSG00000072134	EPN2	protein_coding	8517	-0.207555	0.707221	-0.35388	0.75594	-0.278863	1	0.275995	0.698322	-0.313856	0.765837	0.011007	1	-0.111345	0.857393	0.0492916	0.975831	-0.0287922	1	-0.0239756	0.955872	-0.215632	0.871744	-0.116623	1
ENSG00000072135	PTPN18	protein_coding	5774	-0.834086	0.317464	2.19805	NA	1.36444	1	-0.272937	0.846319	2.05053	NA	1.31331	1	-1.31493	0.255385	-2.1865	NA	-1.68587	1	-0.255546	0.792431	-0.600863	NA	-0.417897	1
ENSG00000072163	LIMS2	protein_coding	8487	1.48617	NA	-3.28619	NA	0.538014	1	0.12884	NA	0.467915	NA	0.308316	1	0.819448	NA	-1.32269	NA	0.114047	1	-0.962361	0.681432	0.205329	NA	-0.263468	1
ENSG00000072182	ASIC4	protein_coding	5250	1.21097	0.658786	-3.02331	NA	0.285654	1	2.90399	NA	-0.903767	NA	2.00349	1	-0.00138157	0.99904	1.46623	NA	0.911511	1	0.640235	0.74984	-1.82544	NA	-0.119716	1
ENSG00000072195	SPEG	protein_coding	17910	2.01555	0.00238254	-0.0723944	0.964829	1.32031	1	1.25105	0.1675	-1.28296	0.16429	0.480836	1	0.767161	0.186126	-0.725488	0.569721	0.205836	1	1.55005	0.000278942	-0.330436	0.810751	0.896688	1
ENSG00000072201	LNX1	protein_coding	5725	1.85267	0.364789	0.451038	NA	1.31577	1	-0.491497	0.878494	-1.36975	NA	-0.8648	1	-0.134978	0.959067	1.39866	NA	0.826704	1	0.9398	NA	-1.81579	NA	0.139019	1
ENSG00000072210	ALDH3A2	protein_coding	6457	-0.0489584	0.927564	0.36119	0.74662	0.170642	1	0.473895	0.459119	1.38859	0.188344	1.00255	1	0.141528	0.852427	1.10771	NA	0.704031	1	0.228751	0.68398	0.366249	0.832882	0.299137	1
ENSG00000072274	TFRC	protein_coding	7887	-0.822818	0.0273755	-0.342	0.7608	-0.56247	1	-0.468612	0.275525	0.0760952	0.940729	-0.170702	1	-1.02711	0.0197938	-0.0400774	0.983475	-0.45078	1	-0.556303	0.111773	0.31289	0.818235	-0.0572144	1
ENSG00000072310	SREBF1	protein_coding	8030	1.92037	2.2485e-05	1.90905	0.0436861	1.91472	0.0218543	2.02107	7.16699e-06	0.228234	0.780238	1.38688	1	1.70488	0.00079225	0.546225	0.708474	1.23887	1	1.26444	0.0035907	1.03062	0.390214	1.15226	1
ENSG00000072315	TRPC5	protein_coding	5839	1.11558	NA	-1.94602	NA	0.278786	1	0.491839	NA	-2.01846	NA	-0.274862	1	0.741184	0.703498	0.0324897	NA	0.429923	1	2.19879	NA	-1.81338	NA	1.28554	1
ENSG00000072364	AFF4	protein_coding	11297	0.371577	0.155832	1.24212	0.0023914	0.871537	1	0.167966	0.652213	0.616279	0.145211	0.409467	1	0.838315	2.72388e-05	1.94377	4.35144e-05	1.49443	3.53766e-05	0.688211	2.81808e-05	1.64316	0.0116951	1.2433	0.00586162
ENSG00000072401	UBE2D1	protein_coding	3486	-2.45032	2.40441e-05	-1.02874	NA	-1.57109	1	-2.01083	0.00567759	-0.719649	0.745741	-1.22537	1	-1.96977	2.85636e-05	0.439721	NA	-0.311474	1	-2.01598	2.17013e-07	-0.211927	0.92749	-0.848623	1
ENSG00000072415	MPP5	protein_coding	8743	0.370085	0.349183	0.745836	0.352722	0.570159	1	0.345039	0.516167	1.4688	0.0594727	1.01368	1	0.431889	0.492505	0.859632	0.573543	0.661555	1	0.77376	0.0332828	0.49083	0.697551	0.639219	1
ENSG00000072422	RHOBTB1	protein_coding	4841	1.51462	0.00046713	0.970343	0.353416	1.268	1	1.05357	0.126648	0.94215	0.464716	0.998938	1	1.60948	0.0301732	1.87694	NA	1.7494	1	1.91085	1.18832e-05	1.85715	0.16688	1.88425	1
ENSG00000072501	SMC1A	protein_coding	10484	1.60098	1.6214e-13	0.381301	0.412174	1.11637	1	1.70333	1.29521e-11	1.08789	0.00254039	1.42818	0.00127019	1.26049	2.99189e-09	-0.299048	0.700293	0.681927	1	1.40839	4.53849e-09	0.698259	0.51973	1.09658	1
ENSG00000072506	HSD17B10	protein_coding	1115	0.865041	0.411334	2.33613	NA	1.78049	1	1.21489	0.540319	0.29074	NA	0.825584	1	0.722897	0.616428	-0.747165	NA	0.167529	1	1.59205	0.158329	2.52867	NA	2.13507	1
ENSG00000072518	MARK2	protein_coding	6154	1.85919	8.86088e-09	1.05299	0.16534	1.51168	1	1.82412	4.54441e-05	0.904764	0.228761	1.43647	1	1.50378	8.99989e-06	0.423322	0.703372	1.06242	1	2.19656	1.35454e-12	0.611736	0.540119	1.61163	1
ENSG00000072571	HMMR	protein_coding	3936	0.437535	0.439057	-0.125575	0.926842	0.183282	1	0.577378	0.509292	0.721104	0.63314	0.65103	1	1.71381	0.0805237	2.73634	NA	2.31383	1	0.24833	0.781754	-0.170645	NA	0.0539985	1
ENSG00000072609	CHFR	protein_coding	17127	-0.0371459	0.963679	-0.395129	0.778013	-0.205062	1	-0.318753	0.680559	-0.614434	0.589703	-0.459032	1	-0.570663	0.299975	-0.420457	0.776992	-0.493606	1	-0.493125	0.289338	-1.00934	0.384932	-0.728267	1
ENSG00000072657	TRHDE	protein_coding	11950	1.43055	0.252708	1.4806	NA	1.45579	1	0.536154	0.830609	-1.08211	NA	-0.057061	1	0.46209	0.244466	1.47678	0.145447	1.05686	1	0.211617	0.574949	0.820423	0.546416	0.547899	1
ENSG00000072682	P4HA2	protein_coding	8502	-0.128217	0.921994	0.865917	NA	0.452837	1	-0.353929	0.724191	2.74237	0.172972	1.9019	1	-2.04566	0.315434	0.273535	NA	-0.462975	1	-0.304466	0.785006	2.06449	NA	1.31979	1
ENSG00000072694	FCGR2B	protein_coding	6651	2.08276	NA	-1.08895	NA	1.23459	1	NA	NA	-3.32248	NA	0	1	-0.319659	NA	NA	NA	0	1	NA	NA	-3.54255	NA	0	1
ENSG00000072736	NFATC3	protein_coding	8806	0.162818	0.746172	0.3154	0.782381	0.241125	1	0.360247	0.631557	0.0228787	0.985707	0.201402	1	0.239461	0.766963	0.859847	NA	0.582747	1	0.21248	0.679633	-0.603438	0.654575	-0.138551	1
ENSG00000072756	TRNT1	protein_coding	5518	-0.789767	0.212682	0.0889145	0.965344	-0.284539	1	-0.95701	0.246466	-0.158396	0.941163	-0.503135	1	-0.474121	0.592411	0.172819	NA	-0.114688	1	-0.943883	0.192154	-0.291365	NA	-0.581043	1
ENSG00000072778	ACADVL	protein_coding	4865	0.594462	0.258098	-0.261972	0.818593	0.228884	1	1.25523	0.0184759	0.648068	0.483845	0.983356	1	-0.650605	0.205631	-2.08648	0.00501885	-1.19683	1	0.0520281	0.928643	-0.430898	0.766313	-0.169322	1
ENSG00000072786	STK10	protein_coding	9083	1.88887	0.00570398	1.32817	0.433206	1.63559	1	2.08939	0.0177891	0.662915	0.676023	1.54571	1	1.51811	0.069504	-1.06509	0.456424	0.740756	1	1.8838	0.000571571	-0.41783	0.786646	1.15024	1
ENSG00000072803	FBXW11	protein_coding	5577	0.765411	0.0177249	2.17668	0.00139947	1.63714	0.00956216	1.10209	0.00113499	1.20347	0.0186899	1.15367	0.00991243	0.678262	0.0422181	2.04789	0.0219178	1.51985	0.0320679	1.08354	1.43128e-06	1.74091	0.0427149	1.44935	0.0213582
ENSG00000072818	ACAP1	protein_coding	7421	2.40999	NA	-0.435523	NA	1.59792	1	-0.000823449	NA	-1.98825	NA	-0.676371	1	0.56728	NA	-1.26744	NA	-0.0761862	1	0.358962	NA	-0.284569	NA	0.0727847	1
ENSG00000072832	CRMP1	protein_coding	5823	1.46474	2.24531e-07	1.34118	0.00223214	1.40429	0.00111618	1.66461	1.39142e-08	1.04661	0.00983737	1.38845	0.00491869	1.27254	2.70704e-10	1.23685	0.0131244	1.2548	0.00656222	1.68885	3.61677e-13	1.20964	0.058952	1.46905	1
ENSG00000072840	EVC	protein_coding	7148	1.9824	0.00036209	0.954026	0.472574	1.55797	1	2.00781	0.0172678	1.35136	0.289137	1.7166	1	3.09333	0.0132599	3.68323	NA	3.41822	1	1.86204	0.0216773	2.23613	NA	2.06118	1
ENSG00000072849	DERL2	protein_coding	6386	-1.74391	0.000286889	-0.802505	0.585683	-1.19775	1	-2.10497	0.000126743	-1.22487	0.3159	-1.59882	1	-2.87276	3.63961e-07	-0.891667	NA	-1.56594	1	-2.00167	4.10736e-07	0.179	NA	-0.533441	1
ENSG00000072858	SIDT1	protein_coding	8060	1.18888	NA	-1.42279	NA	0.407484	1	1.94246	NA	-1.14321	NA	1.10311	1	0.56658	NA	-2.53187	NA	-0.274108	1	-1.54816	NA	-2.27115	NA	-1.86483	1
ENSG00000072864	NDE1	protein_coding	5512	0.640106	0.419162	-1.05195	0.379499	0.0291069	1	1.48904	0.146002	-0.0917668	0.962463	0.905121	1	0.583342	0.735776	-0.562764	NA	0.121228	1	-0.0777578	0.961037	-1.15019	NA	-0.516539	1
ENSG00000072952	MRVI1	protein_coding	7700	0.616978	0.513299	0.55741	NA	0.587501	1	-0.505422	0.727458	2.27917	NA	1.47468	1	1.32286	0.559774	1.84617	NA	1.60811	1	0.186945	0.927228	0.094175	NA	0.141305	1
ENSG00000072954	TMEM38A	protein_coding	3005	-2.9455	0.272078	-1.40845	NA	-1.98128	1	-2.5723	NA	-1.53274	NA	-1.96084	1	-4.17369	0.0877273	-3.08032	NA	-3.52581	1	-1.67606	0.443586	-2.59538	NA	-2.0637	1
ENSG00000072958	AP1M1	protein_coding	14371	0.257862	0.648557	0.254695	0.847821	0.256279	1	1.08704	0.0937667	0.177535	0.888434	0.702801	1	-0.225821	0.688323	-0.112906	0.937204	-0.168259	1	0.627168	0.139736	-0.365677	0.766968	0.214519	1
ENSG00000073008	PVR	protein_coding	3519	-0.678808	0.605281	-0.927877	NA	-0.797974	1	-0.958511	0.361342	-0.934978	0.61459	-0.946696	1	-0.79169	0.450653	-1.36844	NA	-1.05143	1	-0.296727	0.713179	-0.568885	NA	-0.426397	1
ENSG00000073050	XRCC1	protein_coding	3459	0.430006	0.509526	0.383146	0.808587	0.406766	1	1.07006	0.169545	1.1196	0.430489	1.09504	1	0.85932	0.25469	1.21686	NA	1.04914	1	0.76147	0.201546	-0.805154	0.569613	0.181114	1
ENSG00000073060	SCARB1	protein_coding	7741	0.49435	0.753476	0.329336	0.90482	0.414201	1	-0.0614244	0.980327	-0.0112679	NA	-0.0361282	1	-1.08212	0.549449	0.486132	NA	-0.0946358	1	0.319568	0.827962	1.7911	NA	1.23534	1
ENSG00000073067	CYP2W1	protein_coding	2773	NA	NA	-4.01442	NA	0	1	-1.68762	NA	-3.21968	NA	-2.25917	1	-0.331786	NA	-2.06228	NA	-0.951779	1	NA	NA	-4.65169	NA	0	1
ENSG00000073111	MCM2	protein_coding	4902	2.79507	4.07084e-22	2.17402	5.17633e-06	2.51771	2.58816e-06	3.48941	3.87425e-19	2.37499	5.54319e-05	3.03723	2.7716e-05	2.92078	2.76458e-08	5.50504	0.355052	4.72753	1	2.85933	6.09379e-12	4.2255	0.00855267	3.69843	0.00427634
ENSG00000073146	MOV10L1	protein_coding	6872	1.41868	NA	-2.82892	NA	0.492695	1	2.59061	NA	-1.27457	NA	1.68637	1	0.606535	NA	-4.39005	NA	-0.348967	1	2.83594	0.33856	-1.26935	NA	1.91742	1
ENSG00000073150	PANX2	protein_coding	3102	1.77936	0.264287	-0.402083	NA	1.06678	1	1.21383	NA	-1.86116	NA	0.375617	1	0.300954	0.869801	-1.07361	NA	-0.228465	1	0.441604	0.695251	0.414378	NA	0.428055	1
ENSG00000073169	SELENOO	protein_coding	2363	-0.499904	0.674161	0.519211	NA	0.0978297	1	0.0595177	0.971303	1.68063	NA	1.08672	1	-0.578812	0.617285	0.580354	NA	0.114187	1	-0.548357	0.533976	0.680195	NA	0.192923	1
ENSG00000073282	TP63	protein_coding	7454	2.29547	NA	-0.861046	NA	1.44882	1	0.994073	NA	-3.42501	NA	0.0599813	1	1.78509	NA	-2.33924	NA	0.865524	1	0.11885	NA	-4.02547	NA	-0.801788	1
ENSG00000073331	ALPK1	protein_coding	12325	0.488631	NA	-2.29385	NA	-0.315592	1	0.277323	NA	0.227944	NA	0.252845	1	1.29816	NA	-0.134126	NA	0.752905	1	2.39816	0.44127	0.531542	NA	1.74777	1
ENSG00000073350	LLGL2	protein_coding	7909	0.845363	0.679949	0.865466	NA	0.855449	1	2.58734	0.236108	0.895862	NA	1.97647	1	2.84251	0.210372	1.95888	NA	2.46731	1	3.44867	0.18031	1.07759	NA	2.70363	1
ENSG00000073417	PDE8A	protein_coding	7886	-0.643888	0.515989	2.23596	NA	1.41974	1	-1.31185	0.206495	-1.18533	0.514394	-1.2472	1	0.406319	0.700822	-0.170643	NA	0.14649	1	-0.318511	0.740395	-0.873345	0.676614	-0.569418	1
ENSG00000073464	CLCN4	protein_coding	6789	0.825401	0.105826	0.137004	0.919525	0.521878	1	1.47966	0.0210737	0.190192	0.887536	0.974439	1	0.148336	0.831566	-0.130349	0.93712	0.0157124	1	1.10883	0.0326412	0.429303	0.772463	0.808709	1
ENSG00000073536	NLE1	protein_coding	5463	0.296532	0.740989	-0.256818	0.893325	0.0462257	1	0.103422	0.941013	1.30761	0.537998	0.827666	1	0.0162732	0.987515	0.469608	NA	0.260674	1	0.144198	0.883605	-1.33787	0.423173	-0.414344	1
ENSG00000073578	SDHA	protein_coding	8383	1.10261	0.0517082	-0.0625255	0.965347	0.634599	1	1.97953	0.00224976	1.83423	0.10162	1.90871	1	1.52991	0.0135148	2.51761	0.189124	2.10668	1	2.49726	2.0223e-05	3.19172	0.102033	2.88588	1
ENSG00000073584	SMARCE1	protein_coding	11022	-1.55305	3.07891e-06	-0.817693	0.360429	-1.13902	1	-1.24783	0.0102168	-1.13196	0.13657	-1.18873	1	-1.05329	0.000220775	0.393506	0.747145	-0.155655	1	-1.23751	1.93545e-06	0.645995	0.648893	-0.00801358	1
ENSG00000073598	FNDC8	protein_coding	1388	1.68758	NA	-2.32918	NA	0.774066	1	NA	NA	NA	NA	0	1	NA	NA	NA	NA	0	1	NA	NA	NA	NA	0	1
ENSG00000073605	GSDMB	protein_coding	5905	-2.90342	0.023717	-2.83456	NA	-2.86858	1	-2.1618	0.0182612	1.15535	NA	0.293288	1	-2.85238	0.0190107	-3.61789	NA	-3.18495	1	-1.90284	0.0104556	-3.03567	0.0200257	-2.36081	1
ENSG00000073614	KDM5A	protein_coding	12091	2.24365	2.29245e-29	2.32506	1.30361e-13	2.28493	6.51805e-14	2.11096	5.99497e-19	2.02013	1.36021e-12	2.06626	6.80107e-13	1.98266	5.78163e-23	1.31753	0.0204715	1.68809	0.0102358	2.28903	4.61509e-40	1.56508	0.0209468	1.972	0.0104734
ENSG00000073670	ADAM11	protein_coding	4770	-0.402572	0.744948	-0.00264944	NA	-0.188797	1	-0.351177	0.846865	1.3573	NA	0.742433	1	-0.999204	0.354111	-1.02869	NA	-1.01387	1	-0.738156	0.578955	-0.956376	NA	-0.843144	1
ENSG00000073711	PPP2R3A	protein_coding	7837	1.44178	1.34677e-06	1.66084	0.0100394	1.55546	0.00502037	0.743441	0.150812	0.70338	0.435213	0.72355	1	1.54494	1.97474e-09	2.3392	0.00156146	1.99605	0.000780733	1.68994	2.58641e-10	2.29875	0.0148621	2.02623	0.00743106
ENSG00000073712	FERMT2	protein_coding	8510	0.891359	0.0228274	1.40353	0.113568	1.17006	1	0.76181	0.147072	1.49949	0.0521538	1.17729	1	0.879113	0.0743769	0.811574	0.54718	0.845739	1	1.08098	0.00196268	1.46754	0.240295	1.28717	1
ENSG00000073734	ABCB11	protein_coding	5151	0.819403	0.791263	-0.695077	NA	0.252387	1	-0.772962	0.846319	-2.01048	NA	-1.26291	1	-1.91844	0.481329	-3.00283	NA	-2.36106	1	-0.403038	NA	-2.91049	NA	-1.16932	1
ENSG00000073737	DHRS9	protein_coding	3750	NA	NA	NA	NA	0	1	0.474498	NA	-1.53274	NA	-0.205018	1	1.73879	NA	-0.141283	NA	1.08552	1	-1.18221	NA	-3.60387	NA	-1.93533	1
ENSG00000073754	CD5L	protein_coding	2456	NA	NA	NA	NA	0	1	-1.34429	NA	-3.32248	NA	-2.01797	1	NA	NA	NA	NA	0	1	0.992856	NA	-1.77155	NA	0.19094	1
ENSG00000073756	PTGS2	protein_coding	5269	0.267295	NA	-2.32466	NA	-0.511309	1	-2.06665	NA	-1.4643	NA	-1.73426	1	-1.18188	0.730389	-1.57225	NA	-1.3639	1	-2.36625	NA	-3.49112	NA	-2.82172	1
ENSG00000073792	IGF2BP2	protein_coding	4735	-0.346246	0.323754	-0.833234	0.140448	-0.569289	1	-0.587875	0.221599	-0.645346	0.377991	-0.616324	1	-0.46518	0.252567	-1.41072	0.047213	-0.861836	1	-0.826079	0.00430693	-1.01362	0.377729	-0.916802	1
ENSG00000073803	MAP3K13	protein_coding	12623	-0.0788499	0.896031	-0.112266	0.928798	-0.0954612	1	-0.291183	0.65699	-0.781296	0.347468	-0.515526	1	0.112682	0.825255	0.817313	0.463447	0.507595	1	-0.0197416	0.965799	-0.152718	0.908393	-0.0846983	1
ENSG00000073849	ST6GAL1	protein_coding	9151	0.532118	0.362498	0.240963	0.85914	0.393873	1	0.409604	0.68145	-0.674142	0.604769	-0.0328119	1	0.552444	0.410575	0.33165	0.863804	0.446267	1	1.06108	0.0284262	0.290405	0.861997	0.726604	1
ENSG00000073861	TBX21	protein_coding	2614	NA	NA	NA	NA	0	1	NA	NA	NA	NA	0	1	1.42629	NA	-1.28656	NA	0.631096	1	-0.778303	NA	-3.49112	NA	-1.5735	1
ENSG00000073905	VDAC1P1	processed_pseudogene	848	1.70612	NA	-1.40845	NA	0.863755	1	1.77849	NA	-1.52119	NA	0.918033	1	-0.319659	NA	NA	NA	0	1	2.14261	NA	-0.622684	NA	1.34058	1
ENSG00000073910	FRY	protein_coding	13810	2.84717	3.14104e-31	2.6098	4.53709e-08	2.73336	2.26854e-08	2.35171	2.1764e-07	1.06985	0.0510144	1.8487	1	3.04972	1.43653e-59	1.80859	0.000100203	2.5587	5.01016e-05	3.06883	1.03601e-49	1.45915	0.0735766	2.47773	1
ENSG00000073921	PICALM	protein_coding	5833	0.0596707	0.878468	0.823551	0.203443	0.491589	1	0.128763	0.799346	0.91207	0.182228	0.572938	1	-0.0429963	0.923646	0.894159	0.290149	0.500375	1	0.0518685	0.864293	-0.0808557	0.943164	-0.0129678	1
ENSG00000073969	NSF	protein_coding	5005	0.88799	0.0348584	2.43442	0.019809	1.85919	0.0273337	1.66887	0.000626891	1.09827	0.166926	1.4116	1	1.04535	0.0134283	0.548159	0.657692	0.818066	1	1.59788	9.26484e-06	2.02894	0.0897763	1.82945	1
ENSG00000074047	GLI2	protein_coding	7341	1.84679	2.30192e-11	1.53481	0.0113685	1.69922	0.00568426	1.76149	0.026542	2.24853	0.0931402	2.02547	1	2.01316	5.48332e-05	5.74271	0.00201232	4.84757	0.00103358	2.36973	0.00314936	4.50368	NA	3.79979	1
ENSG00000074054	CLASP1	protein_coding	11052	1.61289	2.38785e-16	1.73987	2.38777e-07	1.67778	1.19388e-07	1.4748	1.68971e-08	1.16233	0.000240012	1.32701	0.000120015	1.70757	3.62102e-20	1.82127	0.000570666	1.76554	0.000285333	2.03053	1.23578e-33	1.81323	0.00504552	1.92597	0.00252276
ENSG00000074071	MRPS34	protein_coding	1097	0.972365	0.311682	0.958332	NA	0.965365	1	1.42796	0.217737	0.350901	0.872016	0.98769	1	1.82141	0.104781	-0.365844	NA	1.10778	1	0.0892931	0.946922	0.111741	NA	0.100561	1
ENSG00000074181	NOTCH3	protein_coding	9394	2.40557	4.72416e-35	2.15501	5.42884e-11	2.28572	2.71442e-11	3.23484	7.16133e-28	2.23037	8.53423e-12	2.81831	4.26712e-12	2.63647	3.2389e-18	3.00904	0.00138711	2.83475	0.000693555	2.63072	1.75943e-24	2.98555	4.43594e-05	2.81901	2.21797e-05
ENSG00000074201	CLNS1A	protein_coding	4592	-0.883113	0.0199926	-1.04945	0.161713	-0.963886	1	-0.953949	0.075186	-0.417423	0.69763	-0.660887	1	-0.985815	0.0664231	-1.54399	0.183601	-1.23808	1	-0.771641	0.109212	-0.678672	0.674745	-0.724408	1
ENSG00000074211	PPP2R2C	protein_coding	9198	1.10736	0.273837	1.60769	NA	1.37911	1	0.146379	0.932386	2.67305	NA	1.90392	1	1.32129	0.00132369	0.661317	0.604513	1.02872	1	1.2049	0.190358	3.12243	NA	2.46123	1
ENSG00000074219	TEAD2	protein_coding	2980	-0.133541	0.77396	-0.678348	0.319679	-0.380379	1	-0.0756892	0.911371	-0.494749	0.559273	-0.270057	1	-0.244412	0.756353	-0.0607514	0.980807	-0.149661	1	-0.247108	0.648147	0.355952	0.850033	0.0857058	1
ENSG00000074266	EED	protein_coding	7016	0.387626	0.449127	1.19742	0.327671	0.848611	1	0.590301	0.476307	0.956567	0.472621	0.785026	1	-0.36922	0.635872	-1.22381	0.347961	-0.734142	1	-0.349321	0.546102	0.215012	0.92293	-0.0397349	1
ENSG00000074276	CDHR2	protein_coding	5348	-0.0262819	NA	-4.36126	NA	-0.956511	1	NA	NA	NA	NA	0	1	1.49891	0.646134	0.0122678	NA	0.939166	1	2.46776	0.415765	0.1217	NA	1.7268	1
ENSG00000074317	SNCB	protein_coding	2006	0.490399	NA	-0.987843	NA	-0.0671339	1	-2.2023	NA	-3.22189	NA	-2.62384	1	0.379574	0.835278	-0.0383609	NA	0.185688	1	0.43556	0.803286	0.264878	NA	0.352741	1
ENSG00000074319	TSG101	protein_coding	3839	0.630155	0.245422	0.758741	0.566008	0.69588	1	1.15823	0.129794	0.488865	0.715036	0.862024	1	0.491897	0.505385	0.765725	NA	0.635298	1	0.669612	0.153175	0.701997	0.676537	0.685895	1
ENSG00000074356	NCBP3	protein_coding	14718	-0.533862	0.0814308	-0.932831	0.0766255	-0.719599	1	-0.672306	0.0838334	-0.665998	0.238946	-0.669149	1	-0.228352	0.503781	-1.15023	0.0432016	-0.616875	1	-0.151984	0.562673	-0.0109889	0.992246	-0.0797646	1
ENSG00000074370	ATP2A3	protein_coding	6893	1.06477	0.665508	-2.84575	NA	0.157658	1	0.495377	0.893799	-3.20894	NA	-0.397985	1	3.06739	0.303941	0.762114	NA	2.33321	1	1.39509	0.558008	1.17629	NA	1.28983	1
ENSG00000074410	CA12	protein_coding	7313	-0.418155	0.891584	-2.34419	NA	-1.08113	1	-0.0451764	NA	0.363969	NA	0.173852	1	0.977749	NA	-1.29637	NA	0.248862	1	0.128043	NA	-1.44838	NA	-0.45478	1
ENSG00000074416	MGLL	protein_coding	10102	-0.101989	NA	-4.04866	NA	-1.01133	1	0.642795	0.847049	-1.64433	NA	-0.0883111	1	0.176902	0.941208	-0.967419	NA	-0.284657	1	0.167423	0.928785	-0.337742	NA	-0.0631612	1
ENSG00000074527	NTN4	protein_coding	4166	0.802201	0.178316	0.131637	0.933756	0.505533	1	1.91159	0.0642694	1.12709	0.548107	1.57202	1	1.73356	0.0876496	2.10252	NA	1.9298	1	2.14568	0.00108173	0.731552	0.710983	1.60536	1
ENSG00000074582	BCS1L	protein_coding	3379	-0.0194011	0.9893	0.518364	NA	0.274394	1	0.32105	0.845067	1.90926	NA	1.32348	1	-1.54895	0.124489	-1.87328	NA	-1.70202	1	-0.612181	0.500937	0.391119	NA	-0.0250177	1
ENSG00000074590	NUAK1	protein_coding	7008	0.796191	0.0593718	0.503655	0.636707	0.657325	1	1.05833	0.278992	1.49429	0.381936	1.29271	1	1.51098	5.14241e-05	2.13921	0.0388622	1.85902	0.0194568	1.63237	5.25674e-07	1.10709	0.280427	1.39351	1
ENSG00000074603	DPP8	protein_coding	10211	-0.352637	0.393154	-0.0664837	0.952844	-0.202477	1	-0.958298	0.0231924	0.307092	0.792607	-0.1911	1	-0.724663	0.0821911	-0.184603	0.903065	-0.429508	1	-0.643556	0.0363285	-0.183743	0.892095	-0.395407	1
ENSG00000074621	SLC24A1	protein_coding	9084	0.588477	0.491921	0.568236	NA	0.578392	1	0.195748	0.888791	-0.41922	0.830831	-0.0792138	1	1.46227	0.343384	0.134872	NA	0.946137	1	0.784405	0.523869	1.13844	NA	0.972257	1
ENSG00000074657	ZNF532	protein_coding	11951	0.87737	0.000158753	0.644634	0.161857	0.76569	1	0.762515	0.020707	0.924376	0.110362	0.845714	1	1.18196	3.12415e-07	0.290955	0.707722	0.804174	1	1.20535	3.24038e-08	0.708128	0.397446	0.978056	1
ENSG00000074660	SCARF1	protein_coding	4961	0.074189	0.977062	1.29421	NA	0.809494	1	-0.372459	0.924969	-2.21221	NA	-1.01702	1	1.73049	0.575453	0.408873	NA	1.216	1	-0.138945	0.950489	1.10688	NA	0.614465	1
ENSG00000074695	LMAN1	protein_coding	6767	-1.43266	1.26946e-05	0.412211	0.724301	-0.233472	1	-1.02342	0.0168092	0.1532	0.847681	-0.318342	1	-1.079	0.0124836	-0.0859723	0.962447	-0.498682	1	-1.17279	0.000227724	-0.258961	0.854809	-0.6447	1
ENSG00000074696	HACD3	protein_coding	7097	-0.481899	0.109925	-0.0217815	0.978505	-0.233574	1	-0.0523754	0.927345	0.586875	0.395752	0.30237	1	-0.73174	0.0723489	-0.40049	0.737905	-0.556629	1	-0.594312	0.0493538	1.16847	0.282666	0.541066	1
ENSG00000074706	IPCEF1	protein_coding	8474	0.919483	0.577502	1.37233	NA	1.1636	1	0.0061646	NA	-1.2676	NA	-0.494483	1	0.24266	0.857393	-0.300443	NA	-0.00348476	1	-0.254698	NA	-3.37707	NA	-1.09787	1
ENSG00000074755	ZZEF1	protein_coding	15878	2.36015	5.35446e-20	2.32822	1.57124e-05	2.34427	7.85622e-06	2.0851	5.32504e-09	1.77478	0.000596127	1.93826	0.000298066	2.55345	3.81617e-27	0.94887	0.131234	1.96361	1	2.48358	3.85291e-29	1.83024	0.0132381	2.19358	0.00661904
ENSG00000074771	NOX3	protein_coding	2042	NA	NA	NA	NA	0	1	0.309205	NA	-1.4401	NA	-0.315121	1	-0.680624	NA	NA	NA	0	1	1.04281	NA	-1.70133	NA	0.243509	1
ENSG00000074800	ENO1	protein_coding	3958	0.911074	0.000468881	0.223932	0.764016	0.608032	1	1.66968	2.09247e-06	1.13324	0.00573156	1.42625	0.00286683	1.52608	1.53967e-06	0.459569	0.635273	1.08921	1	1.57685	2.51493e-07	0.581163	0.594379	1.16325	1
ENSG00000074803	SLC12A1	protein_coding	12476	-0.0875248	NA	-4.01442	NA	-0.995657	1	NA	NA	NA	NA	0	1	-0.232426	NA	-1.25205	NA	-0.653975	1	-1.54097	0.474765	-2.65254	NA	-1.99225	1
ENSG00000074842	MYDGF	protein_coding	1678	-0.830369	0.549758	1.00936	NA	0.364797	1	-0.259571	0.867726	-1.31769	0.420961	-0.693721	1	0.074203	0.971394	0.358703	NA	0.223454	1	0.369122	0.77673	-2.40803	0.122218	-0.434422	1
ENSG00000074855	ANO8	protein_coding	4979	1.60304	1.82754e-05	0.482807	0.559435	1.14903	1	1.85595	3.88437e-05	0.50795	0.51817	1.33398	1	0.705071	0.0401018	-0.911919	0.210629	0.112168	1	1.41237	1.20047e-06	0.246779	0.829822	0.944222	1
ENSG00000074935	TUBE1	protein_coding	6973	-0.169758	0.838641	0.354301	0.860181	0.115937	1	0.0316554	0.982788	0.359993	0.854512	0.205145	1	-0.87178	0.217668	-1.93976	0.0900159	-1.30912	1	-1.13463	0.0479411	-1.28312	0.433776	-1.20697	1
ENSG00000074964	ARHGEF10L	protein_coding	7817	1.70918	5.78008e-05	0.888517	0.340063	1.35643	1	1.59201	0.00225392	-0.448458	0.600977	0.905936	1	1.44228	3.26823e-05	-0.0216481	0.9859	0.888544	1	2.13827	2.50671e-14	1.23215	0.189047	1.75521	1
ENSG00000074966	TXK	protein_coding	3472	0.835448	NA	-2.32466	NA	-0.0115634	1	1.31001	NA	-1.87874	NA	0.460137	1	1.42629	NA	-1.28656	NA	0.631096	1	0.9398	NA	-1.81579	NA	0.139019	1
ENSG00000075035	WSCD2	protein_coding	6557	0.647047	0.654183	0.993813	NA	0.830824	1	0.16733	0.956217	-1.29111	NA	-0.384947	1	1.25132	0.0321	1.26402	0.458643	1.25768	1	2.28954	0.010032	2.14505	NA	2.2191	1
ENSG00000075043	KCNQ2	protein_coding	12775	1.62637	1.14626e-06	1.12154	0.124885	1.39592	1	1.16403	0.0273441	0.336659	0.708346	0.808857	1	1.52821	2.74987e-11	1.0678	0.0869217	1.3163	1	1.93537	1.92867e-23	0.987126	0.177431	1.53779	1
ENSG00000075073	TACR2	protein_coding	2871	NA	NA	-3.95691	NA	0	1	0.474498	NA	-1.53274	NA	-0.205018	1	-0.319659	NA	NA	NA	0	1	NA	NA	NA	NA	0	1
ENSG00000075089	ACTR6	protein_coding	3813	-0.189812	0.800796	-1.00788	0.38935	-0.541622	1	0.756628	0.441263	0.326815	0.835711	0.557669	1	0.126617	0.896735	-0.549502	NA	-0.172192	1	0.491536	0.372965	1.58124	0.368815	1.13692	1
ENSG00000075131	TIPIN	protein_coding	2755	-0.486656	0.633928	0.296093	NA	-0.0428336	1	-0.202225	0.909903	-0.322655	NA	-0.261183	1	-1.37207	0.375523	1.65725	NA	0.823949	1	0.363522	0.804741	0.0902043	NA	0.233326	1
ENSG00000075142	SRI	protein_coding	4237	-0.620881	0.27826	-0.958839	0.413699	-0.779987	1	-0.443961	0.552849	0.589133	0.679025	0.163148	1	-1.05704	0.217946	-2.75158	0.0204715	-1.66862	1	-0.905051	0.0995068	0.329647	0.891715	-0.159461	1
ENSG00000075151	EIF4G3	protein_coding	9596	2.43314	7.5354e-35	1.62239	3.40169e-07	2.08399	1.70085e-07	2.42682	2.21115e-21	2.04558	1.58975e-08	2.24875	7.94877e-09	2.33381	3.09974e-30	0.6986	0.200021	1.73645	1	2.60309	1.52177e-48	1.30216	0.0493251	2.09455	0.0246625
ENSG00000075188	NUP37	protein_coding	3492	-0.284616	0.769298	0.147373	NA	-0.0525128	1	-0.306069	0.810052	-0.465743	0.819473	-0.383698	1	0.298412	0.901202	-1.12892	NA	-0.245499	1	0.0274146	0.986522	1.23627	NA	0.754915	1
ENSG00000075213	SEMA3A	protein_coding	9371	-0.574533	0.209053	0.150913	0.906322	-0.166684	1	-0.500295	0.567468	0.00501724	0.997521	-0.225628	1	-0.754535	0.0426908	0.174191	0.902266	-0.216695	1	-0.41324	0.417203	0.5459	0.781469	0.144612	1
ENSG00000075218	GTSE1	protein_coding	4242	1.74461	5.25352e-06	1.46311	0.105613	1.61071	1	2.03472	0.00225303	1.73178	0.123135	1.89119	1	1.9094	0.0229595	2.64264	NA	2.32211	1	1.70315	0.0083711	2.91635	NA	2.43369	1
ENSG00000075223	SEMA3C	protein_coding	6268	-0.516038	0.531209	0.33301	0.883024	-0.0299354	1	-0.312799	0.882305	0.987623	NA	0.479227	1	-0.602404	0.0489799	-0.129023	0.904381	-0.346384	1	-0.778248	0.186651	1.19124	NA	0.519321	1
ENSG00000075234	TTC38	protein_coding	3578	0.842125	0.365034	2.57303	NA	1.95294	1	0.69769	0.580353	1.08999	0.632786	0.907133	1	1.14788	0.690339	1.06618	NA	1.10761	1	0.0907768	0.944942	-0.0823401	NA	0.00681347	1
ENSG00000075239	ACAT1	protein_coding	5584	1.22773	0.12143	2.66472	NA	2.1182	1	1.58421	0.18129	0.0627617	0.976351	1.01539	1	0.965355	0.379751	2.55357	NA	1.96779	1	0.337038	0.728759	-0.988687	NA	-0.178619	1
ENSG00000075240	GRAMD4	protein_coding	4885	1.11391	0.0214779	2.98617	0.0402797	2.33457	0.0308788	1.62321	0.00805281	1.04131	0.306853	1.3614	1	0.843331	0.111941	0.685052	0.641873	0.766361	1	1.13584	0.00249604	0.113506	0.939228	0.713394	1
ENSG00000075275	CELSR1	protein_coding	12806	3.20529	1.99344e-49	3.01818	6.97774e-15	3.11476	3.48887e-15	3.66148	1.4149e-33	2.93484	7.5376e-25	3.34343	3.7688e-25	3.08671	1.26006e-16	3.40158	0.00105553	3.25272	0.000527763	3.54224	4.99428e-42	3.53538	8.31277e-08	3.53881	4.15639e-08
ENSG00000075290	WNT8B	protein_coding	2112	-0.764448	0.71306	-0.481361	NA	-0.615972	1	1.02443	NA	-1.53819	NA	0.250034	1	0.925884	0.641152	2.14523	NA	1.66071	1	-2.67302	0.343074	-1.81579	NA	-2.18165	1
ENSG00000075292	ZNF638	protein_coding	12474	1.46251	1.12006e-11	1.26596	0.00106455	1.36758	0.000532274	0.914323	0.00116225	0.292818	0.516842	0.636783	1	1.55932	2.05784e-17	0.00129303	0.998894	0.981139	1	1.36805	4.67763e-10	0.269191	0.755036	0.920803	1
ENSG00000075303	SLC25A40	protein_coding	5081	-1.48154	0.0035306	-1.45514	0.166478	-1.46828	1	-1.55096	0.045924	-1.13397	0.464789	-1.32745	1	-0.991943	0.169577	-0.536108	NA	-0.746096	1	-1.34918	0.0305779	2.03347	NA	1.16556	1
ENSG00000075336	TIMM21	protein_coding	5208	-0.69229	0.458822	-1.40788	0.3422	-1.00617	1	-0.643396	0.547413	-0.878264	0.609019	-0.756056	1	-0.727812	0.426187	0.262091	NA	-0.149573	1	-1.47165	0.0655057	-1.26211	NA	-1.36308	1
ENSG00000075340	ADD2	protein_coding	12673	0.468645	0.168968	0.860277	0.302236	0.677709	1	0.845035	0.104945	0.780212	0.347089	0.812988	1	-0.121761	0.705689	0.240362	0.772273	0.0706325	1	0.422128	0.0750298	0.660132	0.449493	0.546032	1
ENSG00000075388	FGF4	protein_coding	3233	2.51516	NA	-3.10641	NA	1.54417	1	1.31001	NA	-1.43733	NA	0.510291	1	NA	NA	NA	NA	0	1	1.04281	NA	-2.98044	NA	0.128915	1
ENSG00000075391	RASAL2	protein_coding	16044	0.576627	0.0351306	1.24731	0.0297658	0.950596	0.0324482	0.502521	0.156815	0.757953	0.124761	0.635883	1	-0.0326248	0.925102	0.629814	0.356261	0.336286	1	0.10738	0.690297	0.706192	0.395438	0.437634	1
ENSG00000075399	VPS9D1	protein_coding	3428	0.253671	0.839646	-0.64448	NA	-0.126612	1	1.03671	0.479078	0.747091	NA	0.899158	1	0.366256	0.665889	-0.499163	NA	-0.00251191	1	0.535994	0.448469	1.08677	NA	0.837507	1
ENSG00000075407	ZNF37A	protein_coding	13190	-2.24708	0.00302238	-0.756519	NA	-1.3173	1	-2.10787	0.06585	-1.0865	NA	-1.50863	1	-1.18795	0.0927543	-1.20522	NA	-1.19656	1	-2.04784	0.000521047	-2.47072	0.101142	-2.24384	1
ENSG00000075413	MARK3	protein_coding	8891	1.00496	0.000815799	0.367131	0.604201	0.721011	1	0.934129	0.0250834	1.02	0.111871	0.977704	1	1.07637	0.000344225	-0.0316938	0.977544	0.626202	1	1.44583	8.75295e-08	0.574399	0.558839	1.07493	1
ENSG00000075415	SLC25A3	protein_coding	8896	0.0691468	0.865179	0.527154	0.436161	0.31625	1	0.352019	0.434328	0.131568	0.85709	0.246	1	-0.336388	0.3675	1.65168	0.131603	0.976002	1	-0.0126583	0.976933	0.429784	0.6977	0.225458	1
ENSG00000075420	FNDC3B	protein_coding	13270	0.374966	0.242363	0.760918	0.222151	0.58081	1	0.576289	0.118848	0.594784	0.277686	0.585566	1	0.993066	0.0101795	0.848458	0.401325	0.922573	1	0.856155	0.000864777	1.76574	0.0578272	1.38147	1
ENSG00000075426	FOSL2	protein_coding	7157	-0.250158	0.785383	-1.19454	0.353881	-0.646416	1	-0.688445	0.611298	-0.476907	0.861591	-0.578802	1	0.0468279	0.95163	1.71006	NA	1.10592	1	-0.273483	0.644339	0.998789	0.598193	0.498578	1
ENSG00000075429	CACNG5	protein_coding	1311	-0.0508653	NA	-4.43987	NA	-0.9836	1	0.474498	NA	-1.53274	NA	-0.205018	1	0.586678	NA	-2.10807	NA	-0.206111	1	0.9398	NA	-3.17486	NA	0.0207649	1
ENSG00000075461	CACNG4	protein_coding	3380	1.30068	0.00522295	0.149167	0.898657	0.836886	1	1.07354	0.214027	-0.158469	0.923608	0.585235	1	1.33645	7.96524e-06	0.592559	0.528105	1.01193	1	1.73854	1.00967e-09	0.20765	0.860108	1.16728	1
ENSG00000075539	FRYL	protein_coding	18161	1.69958	9.70036e-15	1.50751	7.14892e-05	1.60674	3.57446e-05	1.01037	0.00249389	0.734089	0.116195	0.878831	1	1.81395	2.44309e-18	0.0292046	0.97375	1.18158	1	1.90463	1.05124e-19	1.23424	0.22018	1.60803	1
ENSG00000075568	TMEM131	protein_coding	12985	0.726177	0.00835462	0.531132	0.385466	0.631948	1	0.316797	0.59501	-0.156409	0.851994	0.0995095	1	0.534768	0.206193	0.103046	0.942204	0.334996	1	0.625744	0.0413228	0.579341	0.665586	0.602729	1
ENSG00000075618	FSCN1	protein_coding	3692	1.51559	1.08583e-08	0.815171	0.185247	1.20748	1	2.05137	5.73167e-11	0.946945	0.0328552	1.60236	0.0164276	1.48464	1.49865e-08	1.52705	0.0307868	1.506	0.0153934	1.72177	9.03882e-15	0.894407	0.26695	1.3666	1
ENSG00000075624	ACTB	protein_coding	3256	0.715206	0.000533731	0.329062	0.385466	0.535015	1	1.14088	3.64994e-07	0.993756	0.000175791	1.06919	8.80781e-05	0.896941	3.34234e-06	1.08775	0.127412	0.9955	1	1.11659	1.97659e-10	0.686068	0.329711	0.917326	1
ENSG00000075643	MOCOS	protein_coding	6281	-0.0512518	0.980974	0.500059	NA	0.25058	1	1.16724	NA	-0.368088	NA	0.594845	1	-2.59314	NA	-3.97341	NA	-3.12414	1	-0.44247	NA	-0.41302	NA	-0.42767	1
ENSG00000075651	PLD1	protein_coding	12859	0.445833	0.838858	0.723786	NA	0.591493	1	-2.29044	0.437405	-1.40168	NA	-1.77868	1	0.262162	NA	-0.640098	NA	-0.119555	1	1.57425	0.394536	1.84355	NA	1.71517	1
ENSG00000075673	ATP12A	protein_coding	4442	-0.0508653	NA	-2.35374	NA	-0.784638	1	0.626914	NA	-2.89838	NA	-0.252931	1	-0.349544	NA	-3.0458	NA	-1.14254	1	0.0951944	NA	-1.81579	NA	-0.564629	1
ENSG00000075702	WDR62	protein_coding	9775	1.40475	0.0150991	0.812845	0.572525	1.13894	1	1.44111	0.0944195	1.58396	0.3159	1.5143	1	1.05463	0.392148	1.39005	NA	1.23207	1	1.70315	0.116144	1.4244	NA	1.5705	1
ENSG00000075711	DLG1	protein_coding	11001	0.212212	0.552788	0.911762	0.148911	0.603979	1	0.213398	0.676143	0.305366	0.693901	0.260115	1	0.339192	0.431767	-0.143724	0.901529	0.117846	1	0.408556	0.173763	0.0330604	0.980264	0.232991	1
ENSG00000075785	RAB7A	protein_coding	2717	-1.36067	0.000419952	-0.650508	0.557734	-0.962325	1	-0.964884	0.0428726	-0.468893	0.663739	-0.695677	1	-1.10828	0.00181916	1.54358	0.288872	0.756603	1	-1.09633	0.000156206	-0.532297	0.661574	-0.786922	1
ENSG00000075790	BCAP29	protein_coding	8409	-1.97248	0.000196751	-0.688334	0.70327	-1.19201	1	-2.29427	0.0202849	-2.2563	0.0998664	-2.27516	1	-2.0951	0.00257108	-0.381233	NA	-0.997357	1	-2.04319	0.00206234	-1.72458	NA	-1.8751	1
ENSG00000075826	SEC31B	protein_coding	7938	-0.922101	0.19979	-1.52591	0.241656	-1.19264	1	-1.25643	0.147365	-1.23832	0.388762	-1.24735	1	-1.24841	0.0576956	-1.93507	0.126117	-1.55127	1	-1.13752	0.0617143	-2.67682	0.0120899	-1.71093	1
ENSG00000075856	SART3	protein_coding	7271	1.78074	4.59202e-10	1.36256	0.0283415	1.58675	0.0141707	2.17273	9.07323e-10	1.12038	0.0286527	1.74045	0.0143264	1.73229	3.43276e-06	-0.106221	0.930365	1.088	1	2.34358	7.80037e-17	1.26693	0.238828	1.90344	1
ENSG00000075884	ARHGAP15	protein_coding	6226	-0.750715	NA	-1.0946	NA	-0.912437	1	3.27721	NA	0.455847	NA	2.46811	1	-0.502889	NA	-0.907264	NA	-0.690955	1	0.11885	NA	-4.00176	NA	-0.800509	1
ENSG00000075886	TUBA3D	protein_coding	1598	1.68758	NA	-1.47167	NA	0.840658	1	NA	NA	NA	NA	0	1	NA	NA	NA	NA	0	1	NA	NA	NA	NA	0	1
ENSG00000075891	PAX2	protein_coding	6243	0.452394	NA	-1.75341	NA	-0.264556	1	1.05807	0.673472	1.39345	NA	1.23548	1	1.39964	0.358888	2.5533	NA	2.08884	1	2.56846	NA	-0.954405	NA	1.68881	1
ENSG00000075914	EXOSC7	protein_coding	4442	-0.0201615	0.987937	0.334975	NA	0.168307	1	0.699758	0.606551	0.13506	0.954105	0.444864	1	-0.781952	0.593218	0.880854	NA	0.276821	1	-0.253934	0.855559	1.0459	NA	0.537674	1
ENSG00000075945	KIFAP3	protein_coding	4978	2.92923	1.49228e-20	2.56151	0.000164273	2.75705	8.21365e-05	2.91822	4.43115e-12	2.50564	6.19355e-05	2.72663	3.09677e-05	2.13144	1.9653e-14	0.99377	0.195287	1.67196	1	2.65003	4.62156e-25	2.42413	0.0174487	2.5415	0.00872433
ENSG00000075975	MKRN2	protein_coding	2848	-0.17893	0.802431	1.60377	0.367714	0.971857	1	0.569521	0.372483	1.20573	0.258085	0.922417	1	-0.82164	0.255385	-0.0823392	NA	-0.405142	1	-0.354859	0.564096	1.0144	0.605178	0.486463	1
ENSG00000076003	MCM6	protein_coding	4118	2.71165	2.22946e-24	2.57186	1.11688e-08	2.64345	5.58439e-09	2.93337	3.15988e-17	3.05088	1.11024e-11	2.99332	5.55124e-12	2.80435	1.16853e-07	2.69862	0.083513	2.75245	1	2.834	6.12663e-15	2.72783	0.0149146	2.78189	0.00745731
ENSG00000076043	REXO2	protein_coding	3699	-0.91239	0.413047	-0.188392	NA	-0.505444	1	-2.99256	0.0699009	-1.76696	NA	-2.25335	1	-1.11342	0.56501	-0.0909862	NA	-0.513464	1	-2.29534	0.127967	-3.71989	NA	-2.8385	1
ENSG00000076053	RBM7	protein_coding	7885	-2.83835	9.70871e-05	-1.43942	NA	-1.97558	1	-2.48244	0.00246646	-0.198343	NA	-0.928935	1	-2.21606	0.00514822	-0.219618	NA	-0.896978	1	-2.81773	4.85729e-07	0.38372	NA	-0.467398	1
ENSG00000076067	RBMS2	protein_coding	8808	-1.96441	6.91797e-06	-1.81614	0.0323773	-1.88837	1	-2.22507	0.000276569	-1.04176	0.464516	-1.51535	1	-1.70575	0.0058036	-2.14918	0.0905863	-1.91049	1	-1.91792	2.35673e-07	-1.04575	0.447209	-1.41691	1
ENSG00000076108	BAZ2A	protein_coding	10918	2.13355	1.04051e-25	2.00183	9.77234e-11	2.06919	4.88617e-11	2.3954	9.66544e-25	2.54231	6.76798e-21	2.47072	3.38447e-21	1.95742	1.31835e-18	1.46797	0.00291467	1.73335	0.00145734	2.31752	3.31248e-27	2.35418	0.000294879	2.33597	0.00014744
ENSG00000076201	PTPN23	protein_coding	5981	2.66177	5.01751e-20	1.69337	0.00328793	2.25734	0.00164396	2.91569	4.61289e-17	2.31403	1.42659e-06	2.646	7.13293e-07	1.66445	3.47117e-07	0.600802	0.503674	1.22851	1	2.31187	2.29757e-15	0.745038	0.405576	1.73146	1
ENSG00000076242	MLH1	protein_coding	3532	0.776965	0.112937	1.92785	0.108702	1.46425	1	0.696488	0.314714	0.643729	0.582538	0.67035	1	0.338021	0.650274	0.157427	0.93712	0.250548	1	0.459964	0.412275	0.194612	0.916398	0.33338	1
ENSG00000076248	UNG	protein_coding	2567	-0.717112	0.228254	-0.443788	0.775629	-0.573987	1	-0.0325304	0.977179	0.937747	0.590116	0.532685	1	-0.238941	0.822361	2.85923	NA	2.01857	1	-0.665829	0.365095	-0.239141	NA	-0.436768	1
ENSG00000076258	FMO4	protein_coding	2517	-1.20003	0.503702	-0.171103	NA	-0.595718	1	-1.16488	0.608583	-0.645343	NA	-0.881849	1	-0.301859	NA	-0.87613	NA	-0.560607	1	-1.76082	NA	-1.81579	NA	-1.78804	1
ENSG00000076321	KLHL20	protein_coding	4254	0.365008	0.55625	1.48014	0.318891	1.02774	1	-0.0194368	0.985929	0.971446	0.533012	0.559454	1	-0.0721239	0.924758	0.736254	0.692634	0.387959	1	0.379925	0.454005	1.70918	0.293089	1.19252	1
ENSG00000076344	RGS11	protein_coding	4798	-0.182162	0.95162	-2.59949	NA	-0.934596	1	-0.272269	NA	-0.944992	NA	-0.56977	1	-0.98397	0.711602	-1.59721	NA	-1.25825	1	-0.719193	0.555555	-3.25113	0.0148834	-1.4891	1
ENSG00000076351	SLC46A1	protein_coding	7838	0.577174	0.673412	-0.223491	NA	0.231687	1	0.177908	0.942382	-0.303082	NA	-0.0426337	1	0.203062	0.895251	0.456757	NA	0.335479	1	0.235832	0.832651	0.600075	NA	0.429418	1
ENSG00000076356	PLXNA2	protein_coding	13781	2.22839	4.1657e-12	2.06863	0.00601314	2.15072	0.00300657	2.88112	2.5276e-05	2.11848	0.0629236	2.54962	1	2.36224	1.3754e-27	1.72631	0.00218299	2.07903	0.00109149	2.63335	2.03667e-16	2.31469	0.01084	2.4828	0.00542
ENSG00000076382	SPAG5	protein_coding	5472	2.16383	6.64307e-15	1.27517	0.0462187	1.78687	0.0231094	2.40008	4.6963e-08	1.82106	0.00905256	2.13943	0.0045263	2.27526	2.06297e-05	1.71594	0.265527	2.02253	1	2.27417	6.68804e-07	2.01726	0.179251	2.15142	1
ENSG00000076513	ANKRD13A	protein_coding	7350	0.792448	0.0837955	0.625849	0.562781	0.711552	1	0.764474	0.222847	0.577514	0.567294	0.67402	1	0.415833	0.474167	0.284623	0.866358	0.351719	1	0.703899	0.121729	0.547483	0.706091	0.62781	1
ENSG00000076554	TPD52	protein_coding	8197	-2.67202	0.00136697	-1.93209	NA	-2.25513	1	-2.27739	0.0491595	1.55462	NA	0.652524	1	-1.88653	0.116861	-1.72306	NA	-1.80248	1	-3.17354	0.00402276	0.0653705	NA	-0.789378	1
ENSG00000076555	ACACB	protein_coding	14505	1.91698	7.15544e-06	0.427787	0.693705	1.35656	1	1.87921	0.010488	0.0451502	0.976158	1.23588	1	1.59887	0.106756	0.905537	NA	1.29346	1	1.89607	0.0045153	0.847879	NA	1.46515	1
ENSG00000076604	TRAF4	protein_coding	4596	1.22308	0.000331145	0.396182	0.643441	0.868078	1	1.90011	1.27567e-06	1.41337	0.0194853	1.67717	0.00974331	1.07864	0.0130246	0.364018	0.785479	0.765131	1	1.60613	2.62581e-06	1.30613	0.240295	1.46392	1
ENSG00000076641	PAG1	protein_coding	11023	0.361716	0.730397	1.2852	NA	0.896121	1	0.196674	0.911778	2.40188	NA	1.68504	1	-1.04308	0.080789	2.09414	NA	1.24944	1	-0.582258	0.215745	0.795564	0.663398	0.265241	1
ENSG00000076650	GPATCH1	protein_coding	4488	1.84961	0.00328952	0.781471	0.610768	1.41222	1	1.56963	0.118809	-0.026739	0.989338	0.981825	1	1.82921	0.00230922	0.874298	0.605914	1.42936	1	2.07164	6.1353e-05	1.29036	0.454675	1.73325	1
ENSG00000076662	ICAM3	protein_coding	2950	-0.0748551	NA	-3.15816	NA	-0.913952	1	-0.435265	NA	-0.36589	NA	-0.400161	1	-0.663101	NA	-1.28656	NA	-0.941412	1	-0.460365	NA	-1.20076	NA	-0.783577	1
ENSG00000076685	NT5C2	protein_coding	5156	0.615001	0.158468	0.511945	0.573756	0.564393	1	0.00931468	0.992142	-0.0855314	0.948	-0.0373291	1	0.828407	0.0081572	1.58876	0.0737444	1.25811	1	0.531628	0.099394	1.0896	0.384233	0.837424	1
ENSG00000076706	MCAM	protein_coding	7422	-0.327099	0.814644	-1.07173	NA	-0.651895	1	1.05535	0.218738	0.273771	0.865363	0.716853	1	0.271319	0.870701	2.27804	NA	1.59863	1	1.08266	0.19849	1.2158	NA	1.15076	1
ENSG00000076716	GPC4	protein_coding	4960	-0.45103	0.266374	-0.618099	0.488575	-0.532148	1	-0.872228	0.274781	0.767528	0.665815	0.169061	1	-0.29442	0.642109	3.59224	0.437654	2.68662	1	-0.865683	0.00940827	0.922746	0.557403	0.289543	1
ENSG00000076770	MBNL3	protein_coding	12199	-1.91932	0.0126909	1.22106	NA	0.376041	1	-2.39074	0.24364	0.605643	NA	-0.224029	1	-0.676916	0.659768	0.399762	NA	-0.0403846	1	-1.85796	0.365914	-0.236212	NA	-0.830282	1
ENSG00000076826	CAMSAP3	protein_coding	4845	2.91304	1.73097e-13	1.39339	0.106882	2.34469	1	2.91606	1.29402e-06	0.941765	0.347209	2.24316	1	2.39979	1.23208e-14	0.761852	0.352205	1.80177	1	2.64325	7.961e-15	1.38232	0.103825	2.14637	1
ENSG00000076864	RAP1GAP	protein_coding	5755	1.16562	0.103639	-0.273291	0.865599	0.618577	1	1.56305	0.048599	0.782421	0.593125	1.22491	1	1.39462	0.067945	4.69016	NA	3.83009	1	1.42659	0.0472399	1.32323	NA	1.37584	1
ENSG00000076924	XAB2	protein_coding	4673	2.99612	3.4093e-17	3.27796	0.000158533	3.14391	7.92666e-05	3.78366	1.426e-15	2.15707	0.000201601	3.1884	0.000100801	2.14999	0.000112797	1.26184	0.447133	1.77321	1	2.79291	2.46287e-13	2.17298	0.097487	2.51599	1
ENSG00000076928	ARHGEF1	protein_coding	8636	1.40572	0.0241685	0.22455	0.882743	0.932783	1	2.06589	0.00312902	0.799569	0.500665	1.56743	1	0.526992	0.518885	-2.09327	0.0343199	-0.255606	1	0.72469	0.20588	0.226985	0.914258	0.497194	1
ENSG00000076944	STXBP2	protein_coding	6036	-0.781056	0.629314	-0.207758	NA	-0.466115	1	0.613102	0.750551	1.14931	0.696195	0.905973	1	-0.572747	0.810504	-0.967485	NA	-0.756657	1	-0.702186	0.653167	-1.19374	NA	-0.92713	1
ENSG00000076984	MAP2K7	protein_coding	5145	-0.026788	0.975502	0.420078	0.814072	0.213878	1	0.543312	0.539266	-0.393694	0.772247	0.14958	1	0.12984	0.864924	0.291358	0.8733	0.212858	1	0.473501	0.309761	-0.423874	0.755113	0.0934891	1
ENSG00000077009	NMRK2	protein_coding	1141	-0.65462	NA	NA	NA	0	1	-0.919226	NA	NA	NA	0	1	-0.690091	NA	NA	NA	0	1	-0.993154	NA	-1.77155	NA	-1.33048	1
ENSG00000077044	DGKD	protein_coding	9771	2.2418	2.05628e-12	2.08076	0.00151381	2.16353	0.000756904	2.01333	0.00033932	0.790729	0.348724	1.52784	1	3.40099	3.80753e-46	2.73123	4.61599e-05	3.10463	2.30799e-05	3.59119	1.07429e-38	4.48759	9.04643e-07	4.10792	4.52321e-07
ENSG00000077063	CTTNBP2	protein_coding	7035	0.633532	0.224159	-0.0311938	0.98003	0.339119	1	0.699541	0.426154	-0.200427	0.900661	0.318624	1	0.915878	0.0167931	-0.979895	0.227155	0.259262	1	0.715632	0.117881	-0.089921	0.962152	0.368364	1
ENSG00000077080	ACTL6B	protein_coding	2389	1.18637	0.379812	1.61329	NA	1.41556	1	0.12309	0.956771	2.426	NA	1.69222	1	-0.0149361	0.985633	-1.5314	0.136287	-0.582467	1	0.579134	0.298327	0.871036	0.632717	0.732455	1
ENSG00000077092	RARB	protein_coding	3697	0.579124	0.795474	0.260808	NA	0.428727	1	1.25857	NA	0.958122	NA	1.11615	1	-0.623312	0.842677	-0.403176	NA	-0.50905	1	-1.6993	NA	-2.85481	NA	-2.16433	1
ENSG00000077097	TOP2B	protein_coding	6044	3.05419	9.82595e-37	2.99067	6.15574e-27	3.02278	3.07787e-27	2.86294	7.89422e-40	2.89228	5.87801e-28	2.87768	2.93901e-28	3.23485	4.09215e-75	1.54449	0.000570666	2.62425	0.000285333	3.20489	2.53857e-107	2.38016	0.000226211	2.85067	0.000113105
ENSG00000077147	TM9SF3	protein_coding	7095	-1.18408	1.11312e-05	-0.625611	0.327039	-0.877988	1	-0.569177	0.132294	0.205701	0.757612	-0.130327	1	-1.40645	8.80762e-07	-0.612322	0.518074	-0.95542	1	-1.08607	2.07124e-05	0.354269	0.749115	-0.193155	1
ENSG00000077150	NFKB2	protein_coding	4484	2.61142	4.1075e-05	1.89148	0.220513	2.2959	1	2.62578	0.000302328	1.9425	0.121727	2.32422	1	1.9856	0.270223	1.17508	NA	1.63653	1	2.33965	0.0014495	0.624393	0.765732	1.7232	1
ENSG00000077152	UBE2T	protein_coding	1065	-1.23691	0.166298	-1.40266	NA	-1.31741	1	-2.17106	0.184852	0.0223289	NA	-0.692403	1	-1.76132	0.339543	-2.48409	NA	-2.07791	1	-0.858022	0.462448	1.41742	NA	0.688308	1
ENSG00000077157	PPP1R12B	protein_coding	21069	-0.455098	0.255962	-0.00227854	0.998926	-0.210995	1	-1.00409	0.0424737	-0.938627	0.336879	-0.970989	1	-0.299724	0.502791	-0.544542	0.600815	-0.416946	1	-0.428952	0.228026	-0.553324	0.614594	-0.489798	1
ENSG00000077232	DNAJC10	protein_coding	21835	-0.882717	0.00170549	-0.457318	0.487587	-0.654394	1	-1.18878	5.72867e-05	-0.630263	0.271087	-0.882662	1	-0.684522	0.0607166	-0.203654	0.87767	-0.424145	1	-1.02344	1.80482e-05	-0.566007	0.582308	-0.77667	1
ENSG00000077235	GTF3C1	protein_coding	11562	3.56858	6.01998e-68	2.75674	9.64676e-15	3.21903	4.82338e-15	3.78913	3.50552e-46	2.58777	5.73766e-20	3.31005	2.86883e-20	3.25131	3.37763e-47	1.85777	0.000191382	2.71664	9.56912e-05	3.98818	9.00579e-80	2.53395	0.000366498	3.43703	0.000183249
ENSG00000077238	IL4R	protein_coding	5894	2.46823	0.0816797	0.523258	NA	1.80134	1	1.56859	0.329833	3.67796	NA	2.97867	1	3.0238	0.131495	2.3102	NA	2.71068	1	0.489594	0.786062	0.926422	NA	0.724479	1
ENSG00000077254	USP33	protein_coding	6918	0.961957	0.000327188	0.830015	0.112738	0.897494	1	0.850093	0.0179361	1.44854	0.0109614	1.18013	0.0144488	0.822723	0.000661977	0.540697	0.46412	0.68859	1	0.900457	1.11245e-05	0.714107	0.455901	0.810288	1
ENSG00000077264	PAK3	protein_coding	10312	-0.448903	0.384501	-0.847559	0.219508	-0.634504	1	-1.04826	0.0365993	-1.12593	0.153526	-1.08657	1	-0.862986	0.000149616	-1.03473	0.0737444	-0.946304	1	-0.864971	7.54107e-05	-0.397287	0.686304	-0.61226	1
ENSG00000077274	CAPN6	protein_coding	3568	1.60467	0.00420963	1.8141	0.207447	1.71318	1	3.46036	0.0661801	2.80372	7.77126e-13	3.16908	1	1.35499	0.425946	2.75416	NA	2.21794	1	2.34925	3.1958e-08	3.34733	0.583824	2.93293	1
ENSG00000077279	DCX	protein_coding	10203	-1.05932	0.277027	-0.0625369	0.937984	-0.4765	1	-1.79689	2.4019e-12	-0.589052	0.291171	-1.0701	1	-1.75714	1.13192e-27	0.379485	0.59453	-0.324897	1	-1.63258	2.0899e-27	-0.35764	0.708622	-0.85863	1
ENSG00000077312	SNRPA	protein_coding	2361	0.286887	0.628047	-0.549128	0.620495	-0.0713928	1	0.683727	0.460329	-0.932346	0.361592	0.0910493	1	0.345282	0.702025	-0.4255	NA	0.0107656	1	0.837664	0.210151	0.351669	0.874025	0.615035	1
ENSG00000077327	SPAG6	protein_coding	3887	0.138134	0.961874	0.00878966	NA	0.0749111	1	1.18297	0.598114	0.0781999	NA	0.733847	1	-0.317046	0.922288	0.570826	NA	0.194141	1	-1.3127	0.443161	0.0126808	NA	-0.502879	1
ENSG00000077348	EXOSC5	protein_coding	1488	0.745249	0.799613	-0.819841	NA	0.165281	1	0.080888	0.978997	0.989095	NA	0.605309	1	-0.426968	NA	-0.141283	NA	-0.277065	1	1.38752	0.571771	0.355969	NA	0.962044	1
ENSG00000077380	DYNC1I2	protein_coding	4695	1.0257	0.00170119	0.27574	0.740805	0.698913	1	1.19922	0.00648936	0.917157	0.20011	1.06507	1	1.26658	0.000484427	-0.417947	0.66232	0.657364	1	1.62789	5.79833e-09	0.261844	0.855488	1.10085	1
ENSG00000077420	APBB1IP	protein_coding	3981	3.71106	NA	-2.51663	NA	2.73019	1	3.26406	NA	-1.37477	NA	2.32083	1	NA	NA	-4.63287	NA	0	1	0.258867	NA	-3.14489	NA	-0.61088	1
ENSG00000077454	LRCH4	protein_coding	6838	1.04596	0.466925	-0.806608	NA	0.398605	1	1.30377	0.385429	0.796133	NA	1.07217	1	-0.594721	0.709331	-0.848926	NA	-0.716232	1	1.38545	0.163937	0.687018	NA	1.0781	1
ENSG00000077458	FAM76B	protein_coding	6042	-1.96597	1.34263e-05	-1.5544	0.154953	-1.74556	1	-2.5333	4.07753e-07	-1.55026	0.17038	-1.95962	1	-2.03338	4.72486e-07	-0.77714	0.606839	-1.27264	1	-1.81454	5.76186e-08	-0.903787	0.501225	-1.28846	1
ENSG00000077463	SIRT6	protein_coding	2787	0.09932	0.94194	3.14503	NA	2.30995	1	0.148565	0.950138	0.592415	NA	0.387492	1	0.0734042	0.956518	2.6876	NA	1.90585	1	0.294368	0.789219	0.561862	NA	0.434306	1
ENSG00000077498	TYR	protein_coding	3016	1.17163	NA	-1.08895	NA	0.445073	1	NA	NA	NA	NA	0	1	NA	NA	NA	NA	0	1	NA	NA	NA	NA	0	1
ENSG00000077514	POLD3	protein_coding	5508	-0.389409	0.482879	0.535004	0.725769	0.145605	1	0.0645276	0.955471	-0.0913468	0.957503	-0.0113055	1	-0.565793	0.561217	1.18767	NA	0.562392	1	-0.354029	0.656211	2.09728	NA	1.33954	1
ENSG00000077522	ACTN2	protein_coding	5530	-0.997935	0.707347	-1.42144	NA	-1.1942	1	-0.98499	0.776011	-0.117842	NA	-0.487223	1	-0.59411	0.821832	-0.894219	NA	-0.736375	1	-5.32129	0.00742891	-4.35329	NA	-4.75758	1
ENSG00000077549	CAPZB	protein_coding	3238	-0.425336	0.386766	-0.586979	0.589065	-0.503895	1	0.342287	0.641481	-0.0807051	0.948721	0.146238	1	0.0780082	0.91004	0.992201	0.527949	0.606337	1	0.155383	0.754393	0.437203	0.772463	0.303164	1
ENSG00000077585	GPR137B	protein_coding	2309	-0.613575	0.530913	-0.179691	NA	-0.380383	1	-1.24412	0.167298	-0.906501	0.622265	-1.06546	1	-1.88238	0.168364	-0.195012	NA	-0.804903	1	-1.44546	0.072003	-0.827507	NA	-1.10365	1
ENSG00000077616	NAALAD2	protein_coding	7254	-2.16088	9.26463e-06	-1.85114	0.0776691	-1.99771	1	-1.86342	4.61972e-06	-1.70754	0.00716058	-1.78338	1	-2.65052	0.00214693	-0.921608	NA	-1.54123	1	-2.5216	4.96329e-08	-0.953412	0.610287	-1.53416	1
ENSG00000077684	JADE1	protein_coding	9129	0.556895	0.134153	0.714285	0.393565	0.637735	1	1.50291	0.0491349	0.726873	0.513037	1.16645	1	0.318785	0.634085	1.57239	0.303947	1.07767	1	0.521656	0.301403	0.604714	0.709444	0.563782	1
ENSG00000077713	SLC25A43	protein_coding	3115	-0.96476	0.629617	-3.59421	NA	-1.74864	1	-0.823684	0.736955	0.932261	NA	0.306415	1	-0.615446	NA	-0.487418	NA	-0.550012	1	-2.57126	0.321568	-1.4327	NA	-1.89246	1
ENSG00000077721	UBE2A	protein_coding	5276	-1.54316	0.00715735	-0.377538	NA	-0.845699	1	-1.3358	0.140469	-0.708809	0.701603	-0.98851	1	-1.75944	0.00940438	-0.0453206	NA	-0.661504	1	-1.12018	0.0290506	0.70057	NA	0.0601742	1
ENSG00000077782	FGFR1	protein_coding	12698	1.43733	8.85575e-11	1.06008	0.0110261	1.261	0.00551304	1.78988	5.40328e-12	1.37282	0.000122002	1.59637	6.10009e-05	1.3199	5.82573e-06	0.879358	0.23379	1.11638	1	1.54507	5.2642e-11	0.783007	0.343401	1.21378	1
ENSG00000077800	FKBP6	protein_coding	2469	0.775337	NA	-1.94602	NA	-0.0209834	1	1.31001	NA	-3.04696	NA	0.378745	1	NA	NA	NA	NA	0	1	1.04281	NA	-1.70133	NA	0.243509	1
ENSG00000077935	SMC1B	protein_coding	4253	2.89115	0.149007	-1.41933	NA	1.96208	1	2.78485	0.307226	-2.00487	NA	1.83609	1	2.54411	0.268698	-2.06389	NA	1.60209	1	2.56846	NA	-3.69422	NA	1.58713	1
ENSG00000077942	FBLN1	protein_coding	7285	0.866085	0.0679098	0.251627	0.827837	0.591325	1	1.61745	2.4083e-05	-0.0450049	0.955648	1.0135	1	1.54808	0.0446874	0.73011	0.697865	1.19631	1	1.24257	0.000543951	0.884655	0.420973	1.07468	1
ENSG00000077943	ITGA8	protein_coding	7528	3.22927	0.0831813	-1.12274	NA	2.29824	1	2.33876	NA	-2.25744	NA	1.3972	1	4.2999	0.110452	-2.39073	NA	3.3138	1	0.11885	NA	-3.53685	NA	-0.770992	1
ENSG00000077984	CST7	protein_coding	930	NA	NA	NA	NA	0	1	NA	NA	NA	NA	0	1	NA	NA	NA	NA	0	1	0.9398	NA	-2.71865	NA	0.0497555	1
ENSG00000078018	MAP2	protein_coding	11559	1.83098	1.15146e-25	2.30538	2.52561e-18	2.08759	1.2628e-18	1.52914	1.45166e-05	1.94988	1.71288e-14	1.7548	7.2583e-06	1.50781	2.06179e-23	1.07901	0.0247694	1.30928	0.0123847	1.6148	7.44401e-32	1.27136	0.0368637	1.45328	0.0184318
ENSG00000078043	PIAS2	protein_coding	17527	-1.57121	3.00385e-07	-1.23709	0.0594563	-1.3945	1	-1.68019	4.66137e-06	0.411221	0.772283	-0.284675	1	-1.41024	2.35528e-06	-0.0953966	0.948026	-0.607943	1	-1.7361	6.84308e-11	-1.17832	0.249915	-1.43042	1
ENSG00000078053	AMPH	protein_coding	5636	2.04453	6.2665e-09	1.56973	0.0439911	1.82658	0.0219955	2.01433	0.0017776	1.72222	0.125319	1.87565	1	1.87761	1.49342e-06	0.751318	0.508041	1.42169	1	2.49335	1.32816e-14	0.577973	0.582743	1.8326	1
ENSG00000078061	ARAF	protein_coding	3535	0.788697	0.183047	-0.274012	0.842275	0.353058	1	1.19467	0.0457294	1.01618	0.316342	1.10819	1	0.926419	0.303195	-0.431646	NA	0.401613	1	0.256644	0.701394	0.693484	0.739756	0.491535	1
ENSG00000078070	MCCC1	protein_coding	4321	1.19802	0.0373163	2.5676	0.141294	2.03957	1	1.03229	0.22968	1.0237	0.527063	1.028	1	1.50697	0.0249993	0.633656	NA	1.13541	1	1.38586	0.00354843	0.128777	0.942891	0.890111	1
ENSG00000078081	LAMP3	protein_coding	3816	0.132813	NA	-1.37783	NA	-0.433207	1	1.87837	0.657912	-1.06414	NA	1.0548	1	0.555394	NA	-0.366127	NA	0.166993	1	0.0823838	NA	-1.81579	NA	-0.574739	1
ENSG00000078098	FAP	protein_coding	7003	-3.12027	NA	NA	NA	0	1	NA	NA	NA	NA	0	1	-1.13048	NA	NA	NA	0	1	NA	NA	-3.49112	NA	0	1
ENSG00000078114	NEBL	protein_coding	13654	-1.31644	0.00347909	-1.66059	0.0170751	-1.47828	1	-0.952194	0.151218	-0.538233	0.637784	-0.730417	1	-1.26904	0.000131432	-1.46452	0.0652231	-1.36347	1	-1.23993	8.08243e-06	0.048736	0.974873	-0.456254	1
ENSG00000078124	ACER3	protein_coding	8442	-2.06926	4.3223e-06	-1.29704	0.280757	-1.63209	1	-3.36356	1.44902e-08	-2.60214	0.0225985	-2.93319	1	-2.61601	6.54548e-07	0.636428	NA	-0.219611	1	-3.5733	2.61019e-12	-2.35593	NA	-2.83985	1
ENSG00000078140	UBE2K	protein_coding	5245	-2.41685	2.93952e-17	-1.21239	0.086961	-1.69241	1	-2.69438	6.61245e-12	-1.88537	0.00134046	-2.23389	1	-2.29784	2.18016e-18	0.226095	0.886871	-0.542635	1	-2.87443	1.32725e-29	-0.297512	0.844377	-1.07397	1
ENSG00000078142	PIK3C3	protein_coding	15198	0.244662	0.547388	0.820729	0.30273	0.561259	1	0.117307	0.834312	1.58955	0.0320781	1.0336	1	-0.0307181	0.949811	0.591971	0.568187	0.313964	1	0.119046	0.727245	0.473819	0.660577	0.307311	1
ENSG00000078177	N4BP2	protein_coding	9835	1.49555	5.88842e-11	1.99009	1.63594e-08	1.76391	8.20915e-09	1.44027	1.13595e-07	1.85729	2.8145e-07	1.66379	1.97523e-07	1.34157	9.8774e-11	1.69307	0.00188107	1.528	0.000940536	1.31084	1.68972e-16	1.08021	0.125257	1.20013	1
ENSG00000078237	TIGAR	protein_coding	4017	-0.580153	0.453206	0.131037	NA	-0.181171	1	-0.767164	0.338512	-0.649541	0.655968	-0.707154	1	-0.253821	0.837091	2.0622	NA	1.32622	1	-1.19803	0.0822673	-0.101515	NA	-0.548012	1
ENSG00000078246	TULP3	protein_coding	3181	-0.218257	0.768048	-0.0266582	0.987148	-0.119279	1	-0.358551	0.723444	0.450421	0.803316	0.10191	1	-0.786702	0.430121	-0.660377	NA	-0.722157	1	0.25499	0.744655	-0.718356	0.695923	-0.151108	1
ENSG00000078269	SYNJ2	protein_coding	12493	0.973034	0.242679	-0.254846	0.888027	0.485963	1	0.913775	0.284553	1.9986	0.215662	1.55584	1	1.66819	0.208829	0.9675	NA	1.35997	1	0.977556	0.187077	1.23926	NA	1.11433	1
ENSG00000078295	ADCY2	protein_coding	17538	2.61827	4.00926e-07	0.888198	0.313772	1.99837	1	2.41879	0.0461466	0.430208	0.845675	1.74301	1	2.35348	3.64753e-08	1.38315	0.212533	1.9484	1	2.03665	0.00119788	1.02999	0.613574	1.6194	1
ENSG00000078304	PPP2R5C	protein_coding	14289	-0.306278	0.358218	0.172265	0.834139	-0.047255	1	-0.105369	0.850854	0.350293	0.656248	0.140377	1	-0.290967	0.484866	0.807391	0.478954	0.360307	1	0.0251101	0.945151	1.44612	0.184151	0.903924	1
ENSG00000078319	PMS2P1	unprocessed_pseudogene	1228	-0.231331	0.865704	-0.650631	NA	-0.425802	1	-2.0334	0.427236	-1.62175	NA	-1.81294	1	-1.2729	0.53802	0.798041	NA	0.106057	1	-0.213869	0.916861	-0.0294187	NA	-0.118698	1
ENSG00000078328	RBFOX1	protein_coding	10121	-2.38185	0.260601	-4.11421	NA	-3.00227	1	-0.581742	0.82586	-1.70693	NA	-1.03731	1	-0.966752	0.0589065	0.131626	NA	-0.315464	1	-1.34457	0.278442	0.575405	NA	-0.0863022	1
ENSG00000078369	GNB1	protein_coding	6417	-0.0690796	0.850957	-0.0818966	0.901196	-0.0754739	1	0.262609	0.485781	0.217871	0.722471	0.240414	1	0.14149	0.646575	0.422375	0.565864	0.288758	1	0.284099	0.209488	-0.0221271	0.984188	0.139096	1
ENSG00000078399	HOXA9	protein_coding	3029	NA	NA	NA	NA	0	1	NA	NA	NA	NA	0	1	1.48924	NA	-1.3335	NA	0.679969	1	-1.61565	NA	NA	NA	0	1
ENSG00000078401	EDN1	protein_coding	2033	0.218829	NA	-3.16126	NA	-0.648858	1	0.126166	NA	-2.03636	NA	-0.582979	1	0.494924	0.847986	-1.69543	NA	-0.219263	1	-0.75569	0.536608	-2.41782	NA	-1.35956	1
ENSG00000078403	MLLT10	protein_coding	6945	-0.101307	0.808936	0.25346	0.782381	0.0869541	1	-0.173339	0.751621	0.497739	0.601701	0.200873	1	0.228887	0.618449	-0.347383	0.752123	-0.0306641	1	0.210361	0.570936	-0.352733	0.755113	-0.0438863	1
ENSG00000078487	ZCWPW1	protein_coding	3318	0.2777	0.910518	0.182516	NA	0.230893	1	-1.33381	0.595707	0.193931	NA	-0.376512	1	0.373982	0.882369	0.156061	NA	0.269132	1	-1.5035	0.522712	-1.21237	NA	-1.3506	1
ENSG00000078549	ADCYAP1R1	protein_coding	6832	-0.0525446	0.967449	1.03028	NA	0.588161	1	-0.485287	0.60676	-1.41498	0.165173	-0.876504	1	-0.609756	0.57837	0.919845	NA	0.348923	1	-0.322523	0.676282	0.204379	NA	-0.03515	1
ENSG00000078579	FGF20	protein_coding	1688	NA	NA	NA	NA	0	1	NA	NA	-4.01553	NA	0	1	0.586678	NA	-2.66703	NA	-0.269481	1	0.9398	NA	-1.81579	NA	0.139019	1
ENSG00000078589	P2RY10	protein_coding	1803	2.90809	NA	-1.13565	NA	1.99302	1	0.629622	NA	-2.90821	NA	-0.251221	1	2.2697	NA	-0.366127	NA	1.48493	1	NA	NA	NA	NA	0	1
ENSG00000078596	ITM2A	protein_coding	2051	0.472726	NA	-0.223762	NA	0.166111	1	-1.21885	NA	-0.312875	NA	-0.695884	1	1.38741	NA	-0.141283	NA	0.816725	1	NA	NA	NA	NA	0	1
ENSG00000078618	NRDC	protein_coding	6773	2.4204	2.10831e-24	1.83602	1.1381e-05	2.1576	5.6905e-06	2.41845	2.00474e-17	2.01625	7.78128e-06	2.23132	3.89064e-06	2.56613	2.29259e-28	0.422998	0.532043	1.86054	1	2.72456	1.14868e-41	1.34831	0.108226	2.19468	1
ENSG00000078668	VDAC3	protein_coding	3141	-0.692171	0.193303	-0.701964	0.607417	-0.69706	1	-0.709897	0.355597	-0.275928	0.84952	-0.476656	1	-0.230372	0.790531	-1.063	0.472531	-0.587436	1	-0.288213	0.622904	-1.50489	0.182896	-0.771923	1
ENSG00000078674	PCM1	protein_coding	14445	2.55323	1.68131e-41	2.13298	4.2174e-14	2.35835	2.1087e-14	2.03084	1.05269e-18	2.01052	7.15949e-15	2.02072	3.58027e-15	2.33563	2.0378e-39	0.498279	0.427815	1.69159	1	2.36785	1.22486e-53	1.28371	0.130922	1.92531	1
ENSG00000078687	TNRC6C	protein_coding	11111	1.06143	0.000125744	0.720274	0.22529	0.900915	1	0.903521	0.0278914	0.837167	0.207177	0.870725	1	1.81614	5.17164e-18	1.07543	0.051072	1.49281	1	1.82344	2.08843e-18	0.72389	0.342732	1.37598	1
ENSG00000078699	CBFA2T2	protein_coding	9457	-0.117803	0.817875	0.757912	0.459661	0.385504	1	-0.253008	0.641547	0.226536	0.823679	0.00659757	1	-0.13647	0.78779	0.41963	0.744788	0.16821	1	-0.108282	0.793226	0.523655	0.707361	0.242014	1
ENSG00000078725	BRINP1	protein_coding	3905	3.63874	0.0559927	0.507278	NA	2.79463	1	0.754844	0.819945	0.445012	NA	0.60823	1	2.15822	6.75077e-05	-0.191548	0.911069	1.41665	1	2.42748	1.27927e-08	1.01065	0.460605	1.88643	1
ENSG00000078747	ITCH	protein_coding	6664	0.160222	0.683479	0.698289	0.3422	0.454196	1	-0.0333396	0.955763	0.653351	0.378831	0.350482	1	0.440556	0.203338	0.555668	0.577916	0.49926	1	0.599589	0.025266	1.7815	0.124252	1.30834	1
ENSG00000078795	PKD2L2	protein_coding	4653	0.665578	NA	-3.86517	NA	-0.27332	1	0.626914	NA	-2.01048	NA	-0.158068	1	1.45133	NA	-1.26744	NA	0.655353	1	NA	NA	NA	NA	0	1
ENSG00000078804	TP53INP2	protein_coding	4228	0.0903877	0.942644	-0.704757	NA	-0.253084	1	-1.92944	0.0589451	-0.846273	NA	-1.2885	1	-0.437171	0.441554	-0.441183	0.763097	-0.439175	1	-0.796845	0.0431667	-0.22702	0.894249	-0.48398	1
ENSG00000078808	SDF4	protein_coding	4709	1.43204	0.00943341	0.10396	0.948549	0.91571	1	1.74143	0.022796	1.57065	0.242818	1.65857	1	0.64694	0.364697	-0.051434	0.980396	0.339605	1	0.445373	0.449136	-1.39342	0.234476	-0.198984	1
ENSG00000078814	MYH7B	protein_coding	7931	0.523331	0.854576	-2.28858	NA	-0.284592	1	0.322996	NA	0.149524	NA	0.238866	1	1.2915	NA	-1.37625	NA	0.502352	1	-0.9979	NA	-1.10004	NA	-1.04807	1
ENSG00000078898	BPIFB2	protein_coding	1898	NA	NA	NA	NA	0	1	0.474498	NA	-1.53274	NA	-0.205018	1	NA	NA	NA	NA	0	1	NA	NA	NA	NA	0	1
ENSG00000078900	TP73	protein_coding	6763	2.44565	NA	-2.83518	NA	1.48229	1	2.69718	NA	-0.26294	NA	1.87159	1	2.64518	0.337223	-2.26313	NA	1.69244	1	2.19879	NA	-2.6411	NA	1.2483	1
ENSG00000078902	TOLLIP	protein_coding	5983	-0.202834	0.820637	-0.359953	0.847727	-0.279256	1	-0.408571	0.711812	0.236651	0.925086	-0.0501857	1	0.0627345	0.943633	1.0235	NA	0.621658	1	-0.192467	0.769316	0.0422804	0.984432	-0.0703239	1
ENSG00000078967	UBE2D4	protein_coding	4713	-0.433939	0.716019	0.594545	NA	0.170075	1	-0.349683	0.800333	3.76913	NA	2.84987	1	-1.47838	0.22975	0.693822	NA	-0.0170845	1	-0.203159	0.844498	-0.285371	NA	-0.24368	1
ENSG00000079101	CLUL1	protein_coding	3846	2.86877	NA	-0.874801	NA	1.97264	1	-0.493885	NA	-2.38654	NA	-1.14984	1	0.659738	0.849457	-0.542565	NA	0.180367	1	2.26148	NA	-1.06774	NA	1.39833	1
ENSG00000079102	RUNX1T1	protein_coding	13535	0.140743	0.878468	-0.209001	0.898517	-0.0235566	1	-0.884012	0.347668	0.934852	0.677389	0.294873	1	-1.0621	1.86228e-06	0.304269	0.723734	-0.222863	1	-1.00403	0.000205229	-1.16283	0.178536	-1.08125	1
ENSG00000079112	CDH17	protein_coding	3901	1.68758	NA	-1.47167	NA	0.840658	1	NA	NA	-3.32248	NA	0	1	1.42629	NA	-2.08966	NA	0.547199	1	-0.741642	NA	NA	NA	0	1
ENSG00000079134	THOC1	protein_coding	8102	-0.972356	0.0664993	-0.758349	0.556696	-0.861388	1	-2.02102	0.00696847	-0.872378	0.633501	-1.33528	1	0.096543	0.902469	-1.30483	0.215949	-0.440285	1	-0.127262	0.839881	-0.558129	0.749115	-0.32667	1
ENSG00000079150	FKBP7	protein_coding	3080	-1.09684	0.301864	-2.04662	NA	-1.49494	1	-1.89593	0.0645768	-1.56097	NA	-1.71875	1	-1.8888	0.0474912	-0.314232	NA	-0.896589	1	-2.06449	0.0113994	-0.998831	NA	-1.43542	1
ENSG00000079156	OSBPL6	protein_coding	11486	0.558012	0.330827	0.479594	0.733226	0.519335	1	-0.047353	0.971066	0.778396	0.716159	0.423811	1	-0.261098	0.655588	-0.624089	0.627939	-0.431207	1	-0.12068	0.822302	0.892305	0.608139	0.472952	1
ENSG00000079215	SLC1A3	protein_coding	6265	-0.957397	0.18277	-1.0313	0.558311	-0.993877	1	-0.808574	0.545594	-0.487626	0.848219	-0.639193	1	-0.269658	0.87288	1.63189	NA	0.974051	1	-1.47645	0.355054	0.698994	NA	-0.012502	1
ENSG00000079246	XRCC5	protein_coding	5463	1.76307	9.30503e-17	1.63831	1.12187e-05	1.70204	5.60933e-06	2.29639	3.03026e-21	2.36752	6.45347e-15	2.33239	3.22674e-15	1.828	2.4463e-13	1.01288	0.0622862	1.47726	1	2.30548	3.37902e-28	1.69498	0.0114202	2.03228	0.00571009
ENSG00000079257	LXN	protein_coding	1504	0.283729	0.921243	-0.365307	NA	-0.00459434	1	-1.14163	NA	-0.168946	NA	-0.574821	1	0.174852	NA	-0.141283	NA	0.0254265	1	1.02994	NA	-0.0418289	NA	0.591376	1
ENSG00000079263	SP140	protein_coding	5582	2.52489	NA	-0.59265	NA	1.68222	1	-0.691709	NA	-1.4643	NA	-1.02689	1	0.692498	NA	-1.26744	NA	0.0225279	1	-0.993154	NA	-2.59395	NA	-1.58206	1
ENSG00000079277	MKNK1	protein_coding	8070	-0.690804	0.576437	-1.44978	NA	-1.02095	1	-0.422883	0.860819	2.24493	NA	1.45577	1	0.33811	0.860225	1.72155	NA	1.18967	1	-1.71523	0.158217	-1.42058	NA	-1.5604	1
ENSG00000079308	TNS1	protein_coding	15595	1.83232	0.0258081	0.332211	0.869745	1.26904	1	1.06755	0.253396	2.31027	0.202749	1.81877	1	0.947629	0.12807	0.898468	0.612616	0.923258	1	1.39046	0.0087914	1.71098	0.248061	1.5596	1
ENSG00000079313	REXO1	protein_coding	5199	2.63536	3.11269e-11	1.52441	0.0904968	2.18428	1	2.82764	6.10421e-08	1.87543	0.0112376	2.42871	0.00561882	2.71596	3.78283e-14	2.11499	0.028268	2.44655	0.014134	2.95581	7.52285e-20	2.28432	0.0227003	2.65878	0.0113501
ENSG00000079332	SAR1A	protein_coding	6914	-1.63065	3.87418e-06	-1.52342	0.0266566	-1.57603	1	-1.23685	0.00326329	-0.919258	0.291689	-1.06933	1	-1.93544	7.83506e-08	-1.17632	0.303947	-1.50652	1	-1.60748	1.01626e-06	0.471015	0.784228	-0.222418	1
ENSG00000079335	CDC14A	protein_coding	5579	0.108046	0.874479	1.17552	0.38935	0.738339	1	-0.452383	0.607445	0.128599	0.951697	-0.132842	1	-0.328511	0.766963	0.696142	NA	0.272934	1	-0.926098	0.156078	1.44194	NA	0.697389	1
ENSG00000079337	RAPGEF3	protein_coding	12078	0.741925	0.730146	-1.79443	NA	-0.0286382	1	0.394294	0.891018	-0.174206	NA	0.137868	1	0.183319	0.941305	-0.629725	NA	-0.166671	1	-0.447327	NA	-4.34881	NA	-1.35388	1
ENSG00000079385	CEACAM1	protein_coding	5524	-0.835552	NA	-3.15827	NA	-1.57265	1	NA	NA	-3.32248	NA	0	1	-0.319659	NA	NA	NA	0	1	0.11885	NA	-1.70133	NA	-0.52142	1
ENSG00000079387	SENP1	protein_coding	6342	0.15055	0.781652	1.23041	0.23764	0.789243	1	0.14561	0.838397	0.381172	0.73534	0.268193	1	0.147177	0.833859	0.787697	0.639553	0.502696	1	0.565362	0.144591	0.748534	0.567974	0.659853	1
ENSG00000079393	DUSP13	protein_coding	2351	2.06352	NA	-2.38797	NA	1.128	1	0.0393704	NA	-1.53274	NA	-0.542368	1	0.571097	NA	-1.28656	NA	-0.0773614	1	-0.778303	NA	NA	NA	0	1
ENSG00000079432	CIC	protein_coding	9494	2.23447	3.44055e-14	1.33755	0.00881967	1.85462	0.00440984	2.26442	1.19123e-06	1.27232	0.00841461	1.85202	0.0042079	2.30388	4.02696e-26	1.63998	0.00328291	2.00979	0.00164146	2.55714	1.75084e-39	1.09231	0.16173	2.00316	1
ENSG00000079435	LIPE	protein_coding	5206	1.99064	0.0310539	1.71345	NA	1.8587	1	3.02015	0.0142882	0.729934	0.725179	2.28851	1	1.67811	0.0742542	2.49062	NA	2.14082	1	1.19151	0.187735	2.61831	NA	2.07454	1
ENSG00000079459	FDFT1	protein_coding	5202	0.627475	0.0426568	0.411972	0.471895	0.523744	1	0.937852	0.0204565	0.365301	0.448016	0.679795	1	-0.138002	0.707061	-0.136745	0.891662	-0.137373	1	0.320928	0.272515	0.383267	0.708	0.352434	1
ENSG00000079462	PAFAH1B3	protein_coding	1419	0.651246	0.430404	-0.952449	0.483993	0.0616231	1	0.8162	0.511816	-1.48834	0.201172	0.0821465	1	0.848705	0.196784	-0.0342434	0.985905	0.473749	1	1.10412	0.0398005	-1.58677	0.127057	0.311849	1
ENSG00000079482	OPHN1	protein_coding	8224	0.417568	0.408489	0.944889	0.410317	0.705188	1	0.194529	0.853185	-0.0931374	0.957335	0.0578538	1	1.00941	0.0325648	1.46087	0.28572	1.25273	1	0.596867	0.283937	2.17688	0.174753	1.59316	1
ENSG00000079557	AFM	protein_coding	2244	NA	NA	NA	NA	0	1	NA	NA	NA	NA	0	1	-0.287473	NA	-4.21491	NA	-1.19564	1	NA	NA	NA	NA	0	1
ENSG00000079616	KIF22	protein_coding	4312	1.59341	3.49462e-05	0.455098	0.695339	1.13373	1	2.67203	1.13429e-05	1.56542	0.0931083	2.22232	1	1.31427	0.0471806	1.44994	NA	1.3837	1	1.54454	0.00253317	-0.450447	0.76404	0.867475	1
ENSG00000079689	SCGN	protein_coding	1482	-1.13352	NA	-3.70554	NA	-1.90927	1	1.31001	NA	-3.53281	NA	0.359423	1	0.556999	NA	-4.79834	NA	-0.408183	1	-0.778303	NA	-4.30837	NA	-1.65853	1
ENSG00000079691	CARMIL1	protein_coding	6799	1.39631	0.000450104	0.953762	0.319325	1.19194	1	1.4083	0.282237	0.484437	0.831625	1.01909	1	0.921225	0.0531178	0.182696	0.904381	0.598711	1	1.95516	0.0040974	0.146175	0.950816	1.31737	1
ENSG00000079739	PGM1	protein_coding	4090	1.28935	0.0250448	1.2364	0.371824	1.26312	1	2.07558	0.0140169	2.4996	0.0859219	2.30311	1	1.41731	0.310209	1.01487	NA	1.23008	1	2.1193	0.0279077	0.153381	NA	1.44811	1
ENSG00000079785	DDX1	protein_coding	3833	1.591	1.01437e-07	1.58315	0.0111951	1.58708	0.00559761	1.60919	8.61921e-06	1.58698	0.00579353	1.59813	0.00290107	1.68711	5.64784e-07	1.23806	0.146853	1.47999	1	1.962	4.69636e-14	1.64138	0.0433361	1.81058	0.021668
ENSG00000079805	DNM2	protein_coding	13443	2.01704	1.73333e-09	1.3288	0.0867673	1.71358	1	2.85208	4.18545e-11	1.92208	0.00190264	2.46076	0.000951318	1.73055	1.39664e-05	1.43949	0.186338	1.59235	1	2.66372	3.58358e-14	2.57265	0.0208646	2.6189	0.0104323
ENSG00000079819	EPB41L2	protein_coding	10320	0.743931	0.0113754	1.37989	0.0359059	1.09667	0.0236406	0.854735	0.0982891	1.93486	0.00223036	1.4936	1	0.0426768	0.956518	-0.044895	0.98173	-0.000444756	1	0.264666	0.569714	3.53822	0.0172377	2.68019	1
ENSG00000079841	RIMS1	protein_coding	12788	1.1016	0.0311553	-0.102671	0.936663	0.621637	1	1.19343	0.168827	0.882909	0.580993	1.04651	1	1.12963	0.000516972	-0.198157	0.850724	0.613386	1	0.969509	0.00861861	1.76521	0.186963	1.42153	1
ENSG00000079931	MOXD1	protein_coding	5293	-0.23097	0.808113	1.51947	NA	0.894883	1	-0.0944836	0.957471	-0.151298	0.957057	-0.122611	1	0.459694	0.796315	1.02439	NA	0.769498	1	-0.061839	0.951563	-0.0732693	NA	-0.0675428	1
ENSG00000079950	STX7	protein_coding	16387	-1.91462	1.81854e-08	-0.978544	0.329038	-1.37196	1	-2.01905	4.99825e-06	-0.39305	0.757754	-0.988163	1	-2.65421	1.92318e-21	-0.614697	0.658446	-1.30059	1	-2.71345	1.39235e-30	-0.937025	0.416211	-1.56752	1
ENSG00000079974	RABL2B	protein_coding	5870	-2.00772	0.0292367	-1.4798	NA	-1.71975	1	-2.63975	0.0412051	-2.96018	0.129844	-2.79109	1	-2.16412	0.0149427	-1.11021	NA	-1.543	1	-1.83163	0.0195678	-1.53785	NA	-1.67727	1
ENSG00000079999	KEAP1	protein_coding	3761	2.09898	0.000106518	1.59846	0.225401	1.87032	1	2.77528	5.00771e-05	3.18169	0.00731596	2.99275	0.00368302	2.23811	0.000285435	3.14702	NA	2.76299	1	2.34678	1.25259e-05	2.12062	0.187004	2.23813	1
ENSG00000080007	DDX43	protein_coding	2807	0.521439	NA	-4.26484	NA	-0.427203	1	-0.893882	NA	-3.49554	NA	-1.67386	1	1.73231	NA	-0.627792	NA	0.98905	1	-0.123231	NA	-2.67312	NA	-0.895775	1
ENSG00000080031	PTPRH	protein_coding	4344	2.77975	0.0930024	2.69161	NA	2.73635	1	2.7859	0.128142	2.12799	NA	2.49413	1	2.03486	0.353849	1.29124	NA	1.71044	1	4.31476	0.000288936	3.18932	NA	3.85911	1
ENSG00000080166	DCT	protein_coding	7543	-0.145729	0.895042	0.459808	NA	0.188579	1	0.817784	0.67993	-1.43574	NA	0.0924465	1	-0.0976027	0.963235	0.910417	NA	0.492711	1	0.450549	0.822231	-1.42662	NA	-0.202107	1
ENSG00000080189	SLC35C2	protein_coding	7708	-1.08369	0.0668553	-0.613807	0.692077	-0.829701	1	-0.647106	0.456808	-1.36708	0.165748	-0.962638	1	-0.550259	0.45154	-1.62027	0.171034	-0.988259	1	-1.14289	0.0435034	-1.48918	0.294158	-1.30567	1
ENSG00000080200	CRYBG3	protein_coding	10929	2.43933	4.79639e-18	2.46685	1.1266e-05	2.45315	5.63299e-06	1.59601	4.27421e-05	1.65683	0.00278753	1.62674	0.00141514	2.32817	6.75686e-06	2.92579	0.0438669	2.65771	0.0219369	2.68891	1.41886e-22	3.64649	0.000181257	3.24573	9.06283e-05
ENSG00000080224	EPHA6	protein_coding	6291	0.831679	0.789268	0.321739	NA	0.599123	1	2.26695	NA	-0.828275	NA	1.4266	1	0.467813	0.822667	0.645437	NA	0.559357	1	0.737333	0.636444	1.04926	NA	0.901712	1
ENSG00000080293	SCTR	protein_coding	3426	1.75126	NA	-2.64497	NA	0.818194	1	0.629622	NA	-1.15772	NA	-0.0033358	1	1.48924	NA	-1.3335	NA	0.679969	1	-0.741642	NA	-3.60387	NA	-1.55574	1
ENSG00000080298	RFX3	protein_coding	11169	-0.958656	4.2072e-05	-0.499703	0.373065	-0.711005	1	-0.901021	0.00073194	0.12896	0.864143	-0.296002	1	-1.03214	7.74104e-06	0.707455	0.384833	0.0853609	1	-0.982503	1.50048e-07	0.643193	0.453126	0.048154	1
ENSG00000080345	RIF1	protein_coding	18166	1.39739	7.51359e-11	1.87011	3.90671e-08	1.65303	1.95711e-08	1.21069	4.35578e-06	1.31912	3.83704e-05	1.26592	2.13631e-05	1.51897	2.90446e-14	1.46149	0.0230677	1.49052	0.0115339	1.35081	1.20974e-14	1.66497	0.0263401	1.51643	0.0131701
ENSG00000080371	RAB21	protein_coding	16036	-2.04402	2.32009e-10	-0.671283	0.526151	-1.20019	1	-2.01349	9.41901e-08	-0.0451665	0.977203	-0.716848	1	-2.30293	6.89239e-15	-0.178502	0.909949	-0.880615	1	-2.36369	4.47023e-22	-1.32493	0.21158	-1.75277	1
ENSG00000080493	SLC4A4	protein_coding	9437	0.995181	0.265293	1.47964	NA	1.25765	1	1.98938	0.105423	1.78086	NA	1.88889	1	-0.248992	0.896577	-0.0342716	NA	-0.137641	1	2.69122	0.0695921	2.04631	NA	2.40451	1
ENSG00000080503	SMARCA2	protein_coding	18595	1.29512	0.000692691	0.60819	0.499609	0.992158	1	1.08407	0.0426764	1.44618	0.101701	1.27645	1	1.22852	0.000526839	0.79342	0.500242	1.02731	1	1.09973	0.0155682	1.82423	0.26407	1.50699	1
ENSG00000080511	RDH8	protein_coding	2001	0.773738	NA	-2.46742	NA	-0.0812261	1	0.327849	NA	-1.43733	NA	-0.300101	1	1.45133	NA	-1.26744	NA	0.655353	1	0.0951944	NA	-1.81579	NA	-0.564629	1
ENSG00000080546	SESN1	protein_coding	5121	0.333572	0.49037	0.241058	0.843724	0.288056	1	0.813018	0.219316	0.848177	0.393513	0.830704	1	0.709011	0.272578	-0.0907414	0.960008	0.363857	1	0.47021	0.357794	0.970741	0.576796	0.742074	1
ENSG00000080561	MID2	protein_coding	3097	1.78007	0.227867	0.974317	NA	1.43273	1	1.84298	0.4549	0.431469	NA	1.30338	1	2.08241	0.0621944	0.360367	NA	1.46438	1	0.787079	0.626781	1.27368	NA	1.0508	1
ENSG00000080572	PIH1D3	protein_coding	1931	-0.851048	NA	NA	NA	0	1	-1.33386	NA	-2.07509	NA	-1.65739	1	1.45133	NA	-2.13417	NA	0.566768	1	1.04281	NA	-1.70133	NA	0.243509	1
ENSG00000080573	COL5A3	protein_coding	6750	1.68896	NA	-1.31667	NA	0.858265	1	1.76015	0.50357	-0.0609519	NA	1.11967	1	0.128531	NA	-0.141283	NA	-7.75467e-05	1	3.16552	0.235102	1.34204	NA	2.52452	1
ENSG00000080603	SRCAP	protein_coding	13674	1.69777	0.0021189	1.67266	0.212341	1.68527	1	1.89332	0.0322165	1.97238	0.173531	1.93339	1	1.84316	0.000293771	1.77534	0.226172	1.80965	1	1.9906	2.91244e-07	2.73716	0.0537788	2.41164	1
ENSG00000080608	PUM3	protein_coding	2707	0.46616	0.387108	1.33873	0.298923	0.96743	1	0.556697	0.383516	0.422435	0.7033	0.491127	1	0.937915	0.177023	1.80015	NA	1.43251	1	0.765264	0.181792	-0.942137	0.471131	0.150652	1
ENSG00000080618	CPB2	protein_coding	1767	NA	NA	NA	NA	0	1	NA	NA	NA	NA	0	1	-1.13048	NA	NA	NA	0	1	-0.741642	NA	-3.54255	NA	-1.54819	1
ENSG00000080644	CHRNA3	protein_coding	4765	-1.06372	0.444472	-0.31647	NA	-0.642246	1	0.0867217	0.966036	0.671064	NA	0.408277	1	0.899579	0.626896	2.33986	NA	1.79245	1	0.0202797	0.995635	-3.39891	NA	-0.850792	1
ENSG00000080709	KCNN2	protein_coding	3864	1.9168	0.121444	-0.35302	NA	1.18865	1	1.31984	0.526685	-0.080043	NA	0.78342	1	2.48265	0.189568	-0.151308	NA	1.69815	1	0.848772	0.769316	-2.66496	NA	-0.0301449	1
ENSG00000080802	CNOT4	protein_coding	6999	-0.573781	0.205701	0.492033	0.700364	0.0553893	1	-0.921139	0.0942627	0.0159768	0.992031	-0.377793	1	-0.85941	0.0415689	0.256836	0.883933	-0.195919	1	-0.742423	0.0533029	-0.589013	0.65442	-0.66368	1
ENSG00000080815	PSEN1	protein_coding	9947	-0.763508	0.0316218	-0.558222	0.50959	-0.657217	1	-0.284777	0.611949	-0.0115546	0.991885	-0.141708	1	-1.21482	0.0142776	-0.848138	0.574204	-1.01986	1	-0.726591	0.037717	-1.28523	0.172124	-0.979039	1
ENSG00000080819	CPOX	protein_coding	3666	-0.261688	0.759673	0.0922838	NA	-0.073873	1	0.518145	0.684287	2.31837	0.288123	1.68253	1	-0.888625	0.409801	0.86833	NA	0.242253	1	-0.59698	0.490669	-1.30343	NA	-0.90739	1
ENSG00000080822	CLDND1	protein_coding	5217	-1.37908	0.000891838	0.446549	0.79548	-0.194922	1	-1.23894	0.0165792	-0.719209	0.512264	-0.955796	1	-2.1694	1.6572e-06	-0.656864	NA	-1.22338	1	-1.68628	2.70671e-07	-1.33923	0.220761	-1.50234	1
ENSG00000080823	MOK	protein_coding	10996	-0.942812	0.237614	-1.33813	0.385376	-1.12697	1	-0.880928	0.467995	-1.00534	0.581004	-0.941794	1	-1.53389	0.0111981	-1.79075	0.188776	-1.65661	1	-1.94945	0.000825817	-2.94442	0.0102626	-2.36281	1
ENSG00000080824	HSP90AA1	protein_coding	5248	1.84083	7.00715e-16	0.070546	0.901584	1.21172	1	2.26662	1.12682e-16	1.05125	0.00016765	1.7833	8.3825e-05	1.94	6.37081e-27	-0.802474	0.0973499	1.14091	1	2.26321	1.17569e-34	-0.126209	0.906562	1.51521	1
ENSG00000080839	RBL1	protein_coding	5954	0.420504	0.337636	0.670423	0.48635	0.550868	1	-0.07501	0.93015	-0.0974283	0.946225	-0.0861756	1	0.185167	0.808669	-0.320796	0.849433	-0.0457469	1	-0.151937	0.798874	0.80284	0.686469	0.403035	1
ENSG00000080845	DLGAP4	protein_coding	8789	-0.202685	0.627255	-1.28113	0.00745263	-0.643401	1	-0.223883	0.688821	-0.570351	0.416511	-0.386741	1	-0.368817	0.241379	-0.775867	0.257342	-0.558034	1	-0.122053	0.65562	-0.376348	0.68685	-0.243605	1
ENSG00000080854	IGSF9B	protein_coding	5753	1.45038	0.000925401	0.577127	0.567066	1.07884	1	2.29004	2.72509e-05	1.44225	0.0671052	1.92754	1	1.65091	7.30782e-06	0.114861	0.931643	1.07833	1	2.02884	5.84825e-13	0.286768	0.805862	1.40618	1
ENSG00000080910	CFHR2	protein_coding	1087	NA	NA	NA	NA	0	1	NA	NA	NA	NA	0	1	NA	NA	NA	NA	0	1	NA	NA	NA	NA	0	1
ENSG00000080947	CROCCP3	transcribed_unprocessed_pseudogene	6813	-2.21537	0.00091982	-2.68487	0.0144443	-2.4311	1	-2.21944	0.00580205	0.0215253	0.99468	-0.701627	1	-0.986225	0.110118	-2.1178	0.047213	-1.4438	1	-2.15056	2.94162e-05	-2.1623	0.0720018	-2.15642	1
ENSG00000080986	NDC80	protein_coding	3600	1.14421	0.0106918	0.89563	0.396572	1.02527	1	1.8993	0.0232144	1.47751	0.304989	1.70377	1	1.00339	0.450435	2.30888	NA	1.79902	1	0.864727	0.352283	2.35965	NA	1.79773	1
ENSG00000081014	AP4E1	protein_coding	7359	0.776131	0.100732	1.3759	0.221584	1.10696	1	0.106146	0.891842	1.89788	0.136888	1.26393	1	0.133857	0.865286	0.471602	0.790416	0.312591	1	0.579562	0.166743	1.50697	0.29387	1.11654	1
ENSG00000081019	RSBN1	protein_coding	6819	0.397734	0.281134	0.889845	0.225066	0.664671	1	0.428291	0.374541	1.39778	0.0438191	0.992987	1	0.101543	0.810838	0.84097	0.313623	0.51812	1	0.25281	0.34373	1.87087	0.0423983	1.2777	1
ENSG00000081026	MAGI3	protein_coding	8180	1.19925	0.000336079	1.56604	0.0344785	1.39427	0.0174073	1.26461	0.00873401	0.540974	0.505115	0.947692	1	1.18713	0.0010586	0.830043	0.435355	1.0196	1	1.37452	1.55669e-05	1.39521	0.224785	1.3849	1
ENSG00000081041	CXCL2	protein_coding	1500	-1.19903	NA	NA	NA	0	1	-1.52534	NA	-1.1508	NA	-1.32595	1	1.45133	NA	-1.26744	NA	0.655353	1	-0.84818	NA	NA	NA	0	1
ENSG00000081051	AFP	protein_coding	3259	-0.0788836	0.977749	-1.79394	NA	-0.695287	1	0.657674	NA	-1.25799	NA	-0.00313105	1	-1.71832	NA	NA	NA	0	1	-1.12746	NA	-3.78528	NA	-1.91525	1
ENSG00000081052	COL4A4	protein_coding	9895	-1.41438	NA	-3.54752	NA	-2.11812	1	-0.26171	0.946859	-0.327651	NA	-0.294304	1	-1.17702	NA	-1.26744	NA	-1.22152	1	0.771273	NA	-1.87603	NA	-0.0150771	1
ENSG00000081059	TCF7	protein_coding	10063	-0.0572768	0.983602	-0.713197	NA	-0.348277	1	0.0373675	0.992034	-0.849686	NA	-0.33903	1	-0.38982	0.877546	-0.283085	NA	-0.335466	1	-1.95133	0.227708	-0.518942	NA	-1.06422	1
ENSG00000081087	OSTM1	protein_coding	5325	-1.81488	0.000688917	-0.764775	0.644412	-1.19632	1	-1.5233	0.0159545	0.81225	0.682001	0.0730224	1	-1.93715	0.00157646	0.0195261	NA	-0.649777	1	-1.61702	0.000809324	-0.0826461	0.972768	-0.654794	1
ENSG00000081138	CDH7	protein_coding	14532	0.280912	0.846455	-0.556541	NA	-0.0778835	1	-0.106042	0.954708	-0.382197	NA	-0.237522	1	-0.365535	0.633595	-0.465172	0.810927	-0.414494	1	-0.312478	0.451099	-1.56139	0.101142	-0.80581	1
ENSG00000081148	IMPG2	protein_coding	8337	-0.811112	0.697619	0.812891	NA	0.218267	1	-4.01469	0.0358504	-3.29916	NA	-3.61301	1	-2.12354	0.0101795	-1.01977	NA	-1.46858	1	-1.9466	0.000495474	-0.144174	NA	-0.780507	1
ENSG00000081154	PCNP	protein_coding	3102	-2.80539	6.21548e-14	-2.70833	6.81897e-06	-2.75604	1	-2.7201	1.74878e-11	-1.21308	0.213656	-1.77816	1	-2.79151	2.56131e-13	-2.1368	0.0403735	-2.42733	1	-2.48286	1.05653e-15	-1.98237	0.0427149	-2.21102	1
ENSG00000081177	EXD2	protein_coding	6263	0.798498	0.116329	0.925417	0.462318	0.863353	1	0.741393	0.269373	1.00689	0.371939	0.880241	1	0.854281	0.11268	1.29747	0.412189	1.09282	1	0.880564	0.0277743	0.071176	0.964728	0.531902	1
ENSG00000081181	ARG2	protein_coding	2418	0.107462	0.92662	0.871511	NA	0.539486	1	0.622007	0.732123	2.61116	NA	1.93527	1	0.363877	0.686856	0.907048	NA	0.660875	1	0.604916	0.444321	0.0301764	NA	0.345979	1
ENSG00000081189	MEF2C	protein_coding	11755	-0.355067	0.745539	-1.54658	0.300218	-0.831161	1	-0.480553	0.645234	-1.40685	0.291531	-0.870602	1	-0.722164	0.187768	-1.29378	0.341224	-0.979844	1	-0.640086	0.240204	-0.7431	0.641461	-0.690674	1
ENSG00000081237	PTPRC	protein_coding	8371	3.24669	NA	0.0874355	NA	2.39976	1	1.26199	NA	-0.651624	NA	0.601614	1	-0.726967	NA	NA	NA	0	1	-0.778303	NA	-4.30837	NA	-1.65853	1
ENSG00000081248	CACNA1S	protein_coding	6168	1.67809	NA	-1.39385	NA	0.840201	1	1.17952	NA	0.44308	NA	0.857788	1	-1.43653	NA	-2.05466	NA	-1.71274	1	1.3984	NA	-0.622684	NA	0.716135	1
ENSG00000081277	PKP1	protein_coding	6211	3.07378	0.192388	-2.07451	NA	2.1139	1	2.47649	NA	-1.65687	NA	1.55644	1	2.17977	0.455104	-1.2327	NA	1.30928	1	1.88211	NA	-0.891938	NA	1.07896	1
ENSG00000081307	UBA5	protein_coding	6827	-0.366711	0.492365	-0.834097	0.361664	-0.581559	1	-1.06193	0.119377	-1.28899	0.137042	-1.171	1	-0.374937	0.513388	0.766147	0.647379	0.305597	1	-0.669924	0.130007	0.468673	0.798476	0.00889953	1
ENSG00000081320	STK17B	protein_coding	6580	-1.7465	0.00463809	-0.317354	NA	-0.861756	1	-0.99394	0.322636	2.29104	NA	1.43194	1	-1.35541	0.236907	1.49447	NA	0.68187	1	-0.783363	0.451085	1.33708	NA	0.635714	1
ENSG00000081377	CDC14B	protein_coding	10462	-1.08846	0.0180181	-1.02142	0.313772	-1.05455	1	-1.16898	0.0334806	-0.69507	0.516035	-0.912652	1	-0.138468	0.864665	-0.0890224	0.964779	-0.113534	1	-0.272857	0.655907	-0.0379952	0.984736	-0.150652	1
ENSG00000081386	ZNF510	protein_coding	5921	-0.780165	0.187113	-0.772166	0.540919	-0.77616	1	-1.06771	0.186565	-0.774294	0.627061	-0.913554	1	-0.194738	0.782734	1.43988	NA	0.842664	1	-0.853267	0.0848393	-0.57972	0.708529	-0.71002	1
ENSG00000081479	LRP2	protein_coding	16260	2.03948	4.04484e-23	1.8454	1.91917e-09	1.9457	9.59584e-10	2.67334	9.48991e-11	1.81381	1.00126e-10	2.30666	9.75128e-11	2.03391	1.20282e-09	2.52102	0.333829	2.29793	1	2.3576	7.92971e-29	2.04215	0.00715409	2.20848	0.00357704
ENSG00000081665	ZNF506	protein_coding	8414	-0.963269	0.0946875	-0.291244	0.876594	-0.588476	1	-2.17646	0.00946158	-1.38069	0.406579	-1.72439	1	-1.65591	0.000485669	-0.16511	NA	-0.725948	1	-1.8052	4.24193e-06	0.0393246	0.985264	-0.606282	1
ENSG00000081692	JMJD4	protein_coding	4315	0.397265	0.73037	-0.17738	NA	0.138366	1	0.782566	0.530185	-0.663429	0.704113	0.23362	1	1.00821	0.287168	0.744295	NA	0.882282	1	0.0801377	0.939479	0.290483	NA	0.189141	1
ENSG00000081721	DUSP12	protein_coding	1762	0.345296	0.733251	-0.414737	NA	0.0147606	1	0.366049	0.849372	2.14134	NA	1.51109	1	-0.595546	0.649557	-0.0858641	NA	-0.318313	1	0.421936	0.662539	-0.898056	NA	-0.0920837	1
ENSG00000081760	AACS	protein_coding	16094	0.503806	0.455676	0.448855	0.780281	0.476593	1	0.855462	0.313299	0.225429	0.891929	0.574568	1	-0.00836785	0.994872	0.448747	NA	0.238219	1	0.657704	0.402378	0.778141	NA	0.719179	1
ENSG00000081791	KIAA0141	protein_coding	6047	-0.72162	0.185596	0.16741	0.923294	-0.209681	1	-0.8918	0.117009	0.152818	0.92951	-0.27694	1	-1.55406	0.00166901	-0.527147	NA	-0.951099	1	-1.24269	0.00130454	-0.261037	0.881889	-0.669931	1
ENSG00000081800	SLC13A1	protein_coding	4415	NA	NA	NA	NA	0	1	NA	NA	NA	NA	0	1	-0.690091	NA	NA	NA	0	1	-0.84818	NA	NA	NA	0	1
ENSG00000081803	CADPS2	protein_coding	6351	1.73063	0.00298767	1.18974	0.388959	1.48539	1	2.22873	2.44749e-05	2.30124	0.0104868	2.26544	0.00525564	1.73476	0.00184706	1.69011	0.335379	1.71261	1	2.2277	1.17426e-06	4.97777	0.00965496	4.1777	0.00482807
ENSG00000081818	PCDHB4	protein_coding	3825	-0.973365	0.256097	-0.142323	NA	-0.498815	1	-1.37279	0.0967784	0.448294	NA	-0.192177	1	-2.01473	0.00088815	1.84748	NA	0.943423	1	-2.4356	6.6038e-06	-1.45206	NA	-1.86159	1
ENSG00000081842	PCDHA6	protein_coding	6133	-0.151445	0.88769	-0.601095	0.75638	-0.358822	1	-0.689834	0.57826	-0.143025	0.954346	-0.390677	1	-0.418635	0.652712	0.877954	NA	0.370666	1	-0.816567	0.175779	-1.01352	0.548471	-0.911684	1
ENSG00000081853	PCDHGA2	protein_coding	6724	-1.43354	0.601224	-1.7551	NA	-1.58538	1	-0.560968	NA	0.0989861	NA	-0.193579	1	-0.0419547	0.985633	1.7987	NA	1.15394	1	-1.51231	0.48665	-1.50828	NA	-1.51029	1
ENSG00000081870	HSPB11	protein_coding	3236	-1.94545	0.00288717	-1.59149	0.284101	-1.75764	1	-2.64109	0.00167037	-0.875142	NA	-1.50327	1	-1.97713	0.0172377	-1.33633	NA	-1.62144	1	-2.41539	0.000567408	-2.31431	NA	-2.36396	1
ENSG00000081913	PHLPP1	protein_coding	9142	2.93433	9.57921e-33	3.00822	2.7351e-09	2.97174	1.36755e-09	2.98386	1.71236e-17	3.13305	7.14523e-09	3.06038	3.57261e-09	3.10833	3.38297e-24	3.09478	0.0027302	3.10157	0.0013651	3.3844	2.07117e-37	3.91006	7.50109e-05	3.67104	3.75054e-05
ENSG00000081923	ATP8B1	protein_coding	6652	-0.259347	0.945101	-0.989894	NA	-0.578865	1	-1.159	NA	-1.63607	NA	-1.3779	1	-1.03141	NA	-1.28656	NA	-1.15335	1	-0.25339	NA	-1.16224	NA	-0.6374	1
ENSG00000081985	IL12RB2	protein_coding	4233	2.86877	NA	-1.42279	NA	1.94062	1	0.651708	NA	-3.52662	NA	-0.270731	1	-0.599933	NA	-1.88397	NA	-1.10358	1	NA	NA	NA	NA	0	1
ENSG00000082014	SMARCD3	protein_coding	5198	2.00533	0.00628699	0.830168	0.59802	1.53424	1	1.85833	0.0840917	-0.237122	0.893089	1.16167	1	0.829837	0.11024	-0.94057	0.377528	0.2007	1	1.13298	0.0251497	0.488251	0.755025	0.846336	1
ENSG00000082068	WDR70	protein_coding	7039	2.05744	9.81457e-07	1.3939	0.165375	1.76349	1	1.79236	0.00496143	1.08996	0.280459	1.48349	1	1.36215	0.0266472	-0.851532	0.488113	0.643796	1	1.51642	0.0009053	1.57106	0.32674	1.544	1
ENSG00000082074	FYB1	protein_coding	6100	2.08276	NA	-1.08895	NA	1.23459	1	1.31001	NA	-0.686071	NA	0.632719	1	-1.0926	NA	-2.93637	NA	-1.73805	1	0.9398	NA	-1.81579	NA	0.139019	1
ENSG00000082126	MPP4	protein_coding	4924	0.267487	NA	-0.624121	NA	-0.110508	1	-3.08473	NA	NA	NA	0	1	0.379522	NA	-0.87613	NA	-0.115803	1	-4.08339	0.159424	NA	NA	0	1
ENSG00000082146	STRADB	protein_coding	3242	-1.26981	0.142255	-1.19622	NA	-1.23254	1	-1.61186	0.187957	1.86065	NA	0.985093	1	-1.50686	0.217071	-0.122922	NA	-0.654941	1	-0.541481	0.527242	1.73593	NA	1.00648	1
ENSG00000082153	BZW1	protein_coding	8085	0.158689	0.757627	0.898745	0.380409	0.575659	1	-0.122391	0.867726	0.348719	0.753525	0.13231	1	-0.757416	0.0407442	0.529005	0.684665	0.024666	1	-0.485008	0.187251	-0.306853	0.835713	-0.393182	1
ENSG00000082175	PGR	protein_coding	15404	2.98109	NA	-2.41326	NA	2.01499	1	2.41411	NA	-1.44286	NA	1.51039	1	0.792801	0.793786	-2.30598	NA	-0.0479214	1	-0.720783	NA	-4.02396	NA	-1.58157	1
ENSG00000082196	C1QTNF3	protein_coding	3576	-2.78764	0.0210667	-2.4442	NA	-2.60572	1	-2.42855	0.226264	-2.38371	NA	-2.40595	1	-4.34499	0.00131463	-2.03651	NA	-2.77122	1	-3.38525	0.000341858	-0.132469	NA	-0.988541	1
ENSG00000082212	ME2	protein_coding	16243	0.575428	0.107112	1.41085	0.0814368	1.05279	1	0.581478	0.255733	0.798328	0.293712	0.693973	1	-0.535703	0.246053	0.308723	0.852753	-0.0525712	1	-0.301905	0.370058	0.632277	0.612383	0.239514	1
ENSG00000082213	C5orf22	protein_coding	4172	-0.726917	0.0983745	-0.0246383	0.985107	-0.333461	1	-0.294014	0.685815	0.720468	0.536632	0.300619	1	-0.549741	0.356202	0.357558	NA	-0.0259128	1	-0.310512	0.481229	0.489642	0.758866	0.144341	1
ENSG00000082258	CCNT2	protein_coding	9081	-0.856559	0.0065885	-0.173812	0.857258	-0.475169	1	-1.21683	0.00294183	-0.775435	0.308405	-0.979316	1	-1.0344	0.000547918	-0.340977	0.772681	-0.646421	1	-1.13097	8.01122e-06	-0.948098	0.268293	-1.03664	1
ENSG00000082269	FAM135A	protein_coding	10589	0.169466	0.705211	0.420957	0.636927	0.300684	1	-0.097665	0.885951	0.386817	0.670782	0.164818	1	0.84056	0.0225667	0.914055	0.340174	0.877776	1	0.850248	0.00477691	0.900758	0.367362	0.875724	1
ENSG00000082293	COL19A1	protein_coding	8511	2.79939	NA	-0.403022	NA	1.94818	1	1.58569	NA	-3.22492	NA	0.636201	1	-1.09809	0.637877	-0.987285	NA	-1.04162	1	-1.11077	NA	-4.00176	NA	-1.92832	1
ENSG00000082397	EPB41L3	protein_coding	12203	1.67535	0.0052946	0.989984	0.49572	1.37299	1	1.50329	0.101744	-0.605121	0.643581	0.80418	1	1.15628	0.0131238	-0.662412	0.544395	0.516339	1	1.58239	2.91208e-07	1.89401	0.0858609	1.7466	1
ENSG00000082438	COBLL1	protein_coding	17178	0.265777	0.865736	1.36662	NA	0.918745	1	0.865957	0.663402	1.45184	NA	1.18844	1	0.477898	0.797666	2.51829	NA	1.83223	1	0.44252	0.770914	1.24147	NA	0.896611	1
ENSG00000082458	DLG3	protein_coding	7844	0.305053	0.485335	0.694042	0.472037	0.512618	1	0.161959	0.832996	0.319342	0.784112	0.242795	1	0.650329	0.0786181	0.42354	0.710143	0.541386	1	0.585926	0.133991	0.518215	0.633433	0.552468	1
ENSG00000082482	KCNK2	protein_coding	3910	0.631223	0.758895	0.279731	NA	0.466155	1	-0.523312	NA	-2.35434	NA	-1.16597	1	-1.26189	0.499231	-0.894852	NA	-1.06673	1	-1.44548	0.483895	-0.672065	NA	-1.00755	1
ENSG00000082497	SERTAD4	protein_coding	5467	-0.46056	0.69857	0.562979	NA	0.140138	1	-0.327294	0.893941	1.90854	NA	1.18628	1	-0.559626	0.232197	3.81801	NA	2.8858	1	-0.0375618	0.980954	0.0844676	NA	0.0247427	1
ENSG00000082512	TRAF5	protein_coding	9022	-1.11556	0.190039	1.13396	NA	0.409314	1	-1.67275	0.295021	-2.16507	NA	-1.89801	1	0.0606293	NA	0.106533	NA	0.0837637	1	-1.45598	0.248399	-0.733998	NA	-1.05029	1
ENSG00000082515	MRPL22	protein_coding	5267	-1.16709	0.204262	-0.342463	NA	-0.696642	1	-0.712839	0.620566	-0.917709	0.632255	-0.811641	1	-1.30975	0.218487	0.0925416	NA	-0.44454	1	-1.22637	0.1199	2.22215	NA	1.34859	1
ENSG00000082516	GEMIN5	protein_coding	5637	2.5506	1.51324e-16	2.74719	3.75086e-05	2.65224	1.87543e-05	2.91016	2.88537e-10	2.87549	8.25606e-06	2.89293	4.12817e-06	2.7288	1.54793e-09	1.65764	0.200134	2.29043	1	2.80313	2.90129e-17	2.37647	0.0233223	2.60552	0.0116611
ENSG00000082556	OPRK1	protein_coding	5738	-1.3403	0.482751	0.666837	NA	-0.0126603	1	-2.70667	NA	-1.0603	NA	-1.66037	1	-0.996264	NA	-0.470833	NA	-0.709759	1	-1.03066	NA	-3.49112	NA	-1.78981	1
ENSG00000082641	NFE2L1	protein_coding	5825	1.17539	8.24254e-06	1.05283	0.0594558	1.11541	1	1.60605	1.26962e-05	0.978677	0.0364488	1.3262	0.0182308	0.8159	0.00780601	1.74061	0.0352848	1.35111	0.0215454	1.32122	4.6935e-08	1.37767	0.0815602	1.34972	1
ENSG00000082684	SEMA5B	protein_coding	6224	0.382361	0.459292	1.62473	0.170191	1.13334	1	0.783149	0.228422	0.930464	0.349601	0.858686	1	0.367191	0.740992	0.143444	NA	0.259651	1	0.676952	0.417163	0.542405	NA	0.611247	1
ENSG00000082701	GSK3B	protein_coding	8006	-0.375542	0.183148	0.124898	0.86928	-0.103731	1	-0.383956	0.322929	0.271032	0.6951	-0.0196061	1	-0.419674	0.0823646	0.481412	0.500045	0.100105	1	-0.276454	0.199457	0.52773	0.530446	0.180961	1
ENSG00000082781	ITGB5	protein_coding	6447	1.62396	0.00329897	1.26781	0.335262	1.45685	1	2.02301	0.000218062	2.54562	0.0104346	2.30785	0.00532635	1.44802	0.102336	1.92077	NA	1.70367	1	2.45951	0.00983103	1.72626	NA	2.13898	1
ENSG00000082805	ERC1	protein_coding	13484	1.85118	7.91036e-13	1.58668	0.00823419	1.72498	0.0041171	1.63694	1.88854e-05	1.04276	0.0846162	1.37022	1	2.09999	2.83834e-18	0.330995	0.689773	1.47118	1	2.05542	4.77565e-19	0.663973	0.442521	1.52132	1
ENSG00000082898	XPO1	protein_coding	11708	0.297198	0.187783	0.767363	0.0220993	0.551349	1	0.514604	0.0802584	0.611106	0.041023	0.563662	1	0.473586	0.0581001	0.0183117	0.982785	0.263834	1	0.81527	7.40932e-05	0.774874	0.426501	0.795213	1
ENSG00000082929	LINC01587	processed_transcript	1164	NA	NA	NA	NA	0	1	NA	NA	NA	NA	0	1	NA	NA	NA	NA	0	1	NA	NA	NA	NA	0	1
ENSG00000082996	RNF13	protein_coding	3635	-1.58122	0.043404	-1.14704	NA	-1.34786	1	-1.19265	0.248808	-0.701285	0.750787	-0.92615	1	-0.976586	0.333225	-0.0431717	NA	-0.435671	1	-0.988604	0.201018	0.386347	NA	-0.143178	1
ENSG00000083067	TRPM3	protein_coding	19912	1.13552	0.0247916	1.14252	0.364864	1.13902	1	0.929459	0.336364	1.07996	0.527529	1.00667	1	0.609618	0.318049	0.29692	0.868465	0.461725	1	1.17851	0.267642	1.80586	NA	1.52602	1
ENSG00000083093	PALB2	protein_coding	4747	2.1274	3.77054e-06	1.9382	0.0497938	2.0359	0.0248988	1.73206	0.0110665	2.19974	0.0746913	1.98477	1	2.94666	1.36594e-08	1.58544	0.225701	2.42097	1	2.40003	8.19749e-08	2.02368	0.17033	2.2241	1
ENSG00000083097	DOPEY1	protein_coding	10045	1.61423	3.55862e-09	1.33267	0.018504	1.48031	0.00925201	0.931305	0.0227102	1.31518	0.0629565	1.13597	1	1.4037	1.11089e-09	-0.182521	0.827512	0.818421	1	1.27566	4.35893e-09	0.126089	0.911541	0.81247	1
ENSG00000083099	LYRM2	protein_coding	8679	-1.87802	0.00221528	-1.23818	0.432947	-1.52292	1	-2.61004	0.00218841	-2.50602	0.0602853	-2.55709	1	-1.87209	0.00593177	0.447825	NA	-0.288805	1	-1.68246	0.0219238	-1.86581	0.258863	-1.77122	1
ENSG00000083123	BCKDHB	protein_coding	4071	-1.49282	0.00265933	1.9757	NA	1.10047	1	-0.964144	0.103017	0.90957	0.576295	0.257655	1	-1.36226	0.10984	1.719	NA	0.880118	1	-1.91778	0.00238046	0.313188	NA	-0.408214	1
ENSG00000083168	KAT6A	protein_coding	11852	2.56455	1.04665e-34	2.42386	4.43356e-14	2.49592	2.21678e-14	2.68347	3.20139e-21	2.05404	6.62173e-12	2.40281	3.31087e-12	2.70516	6.17894e-38	1.7773	0.00183286	2.31457	0.000916432	2.82851	3.20672e-55	2.82223	5.37087e-05	2.82537	2.68544e-05
ENSG00000083223	ZCCHC6	protein_coding	6707	2.24117	1.8224e-14	1.39529	0.0199994	1.87936	0.00999971	1.69292	3.74735e-05	0.901876	0.187082	1.35095	1	2.3444	7.22416e-15	0.546711	0.533949	1.70913	1	2.30522	2.46153e-18	0.274367	0.808125	1.62103	1
ENSG00000083290	ULK2	protein_coding	9843	0.526897	0.204092	1.39613	0.120755	1.02601	1	0.633606	0.414552	0.618773	0.513037	0.626209	1	1.01896	0.00165739	0.779351	0.382791	0.904124	1	1.20388	8.81827e-07	1.3527	0.126751	1.28021	1
ENSG00000083307	GRHL2	protein_coding	6060	0.745607	NA	-1.47787	NA	0.0255231	1	0.266471	NA	-2.25564	NA	-0.501988	1	0.680245	NA	-2.79847	NA	-0.195821	1	0.9398	NA	-1.81579	NA	0.139019	1
ENSG00000083312	TNPO1	protein_coding	11977	0.042263	0.901838	1.12882	0.00515923	0.685507	1	0.070997	0.867438	1.75035	3.22053e-06	1.14236	1	-0.580281	0.0122431	0.744875	0.221783	0.22938	1	-0.291863	0.13335	1.26602	0.114645	0.687874	1
ENSG00000083444	PLOD1	protein_coding	5320	-0.121901	0.922951	-0.886707	NA	-0.454207	1	0.401351	0.719586	0.609124	0.767382	0.508975	1	0.319012	0.854903	1.37153	NA	0.939199	1	0.504074	0.583284	0.167646	NA	0.345645	1
ENSG00000083454	P2RX5	protein_coding	4190	-0.851048	NA	NA	NA	0	1	0.474498	NA	-1.53274	NA	-0.205018	1	-2.0289	NA	NA	NA	0	1	-0.759784	NA	-2.62768	NA	-1.41045	1
ENSG00000083457	ITGAE	protein_coding	6657	0.149889	0.93053	-0.744258	NA	-0.228995	1	0.375788	0.866027	0.579161	NA	0.481055	1	-0.917724	0.583781	-2.48481	NA	-1.4982	1	-2.04108	0.0590769	-1.60256	NA	-1.80522	1
ENSG00000083520	DIS3	protein_coding	10835	1.62369	1.99345e-09	2.05277	0.000738164	1.85412	0.000369083	1.47255	4.74794e-06	1.50501	0.00137841	1.48887	0.00069158	1.41465	1.29514e-06	1.91976	0.0258904	1.6892	0.0129458	1.19076	4.32464e-06	0.946977	0.273899	1.07401	1
ENSG00000083535	PIBF1	protein_coding	4253	0.776641	0.1148	1.23337	0.295083	1.023	1	-0.017908	0.985211	-0.453995	0.664903	-0.219537	1	0.164847	0.844391	-0.80162	0.582453	-0.238926	1	0.250714	0.626087	-0.937772	0.445531	-0.224457	1
ENSG00000083544	TDRD3	protein_coding	6814	0.482955	0.420428	-0.29127	0.822425	0.147167	1	0.594467	0.423733	0.717673	0.592304	0.657385	1	1.41112	0.0305146	0.443818	0.820139	1.00706	1	1.57059	0.0145281	0.823754	0.677945	1.24497	1
ENSG00000083622	AC000061.1	antisense_RNA	376	NA	NA	NA	NA	0	1	NA	NA	NA	NA	0	1	NA	NA	NA	NA	0	1	NA	NA	NA	NA	0	1
ENSG00000083635	NUFIP1	protein_coding	3492	0.306126	0.742302	1.38173	NA	0.94193	1	0.678293	0.628782	-0.0877824	0.974352	0.345517	1	-0.116535	0.941991	0.796453	NA	0.411006	1	-0.165282	0.875578	1.2418	NA	0.703408	1
ENSG00000083642	PDS5B	protein_coding	13212	1.61552	6.19876e-11	1.37284	0.00049096	1.49927	0.00024548	1.83349	1.54129e-07	2.27523	2.19414e-05	2.0712	1.10478e-05	1.84288	5.68391e-18	0.89837	0.137547	1.44658	1	1.90149	2.74779e-26	1.21273	0.119959	1.59783	1
ENSG00000083720	OXCT1	protein_coding	4194	-0.122613	0.84765	1.15177	0.412174	0.650941	1	0.0967597	0.915573	1.64926	0.203943	1.07248	1	-0.373829	0.568534	1.01966	NA	0.485	1	-0.0677669	0.909073	0.0380817	0.983282	-0.0138721	1
ENSG00000083750	RRAGB	protein_coding	2725	0.317763	0.656676	-0.966568	0.362072	-0.185968	1	-0.379909	0.671153	-1.41807	0.137768	-0.807555	1	0.113792	0.88432	-0.891162	0.486548	-0.302895	1	0.0865045	0.877284	-1.18738	0.258985	-0.414179	1
ENSG00000083782	EPYC	protein_coding	1805	NA	NA	NA	NA	0	1	0.309205	NA	-1.4401	NA	-0.315121	1	NA	NA	NA	NA	0	1	1.26396	NA	-2.30035	NA	0.381039	1
ENSG00000083799	CYLD	protein_coding	12954	0.941494	0.0129105	1.03062	0.243957	0.986747	1	0.555034	0.343247	1.25688	0.227151	0.948223	1	0.82735	0.00378166	1.82133	0.0196046	1.4083	0.0116931	1.0479	1.8822e-05	1.69037	0.0637871	1.40461	1
ENSG00000083807	SLC27A5	protein_coding	8025	-1.88917	0.482623	-1.81336	NA	-1.85077	1	-0.596635	0.855992	-0.450779	NA	-0.521865	1	1.407	NA	-0.801649	NA	0.689546	1	-0.518291	0.81997	-0.96899	NA	-0.726112	1
ENSG00000083812	ZNF324	protein_coding	5664	0.632341	0.545655	3.58576	NA	2.76094	1	1.45998	0.223825	1.05179	0.604803	1.27027	1	1.65114	0.0186152	3.24364	NA	2.65679	1	2.16761	0.00220366	1.98841	NA	2.08079	1
ENSG00000083814	ZNF671	protein_coding	3532	0.623806	0.53575	-0.0204792	NA	0.337334	1	0.424437	0.770515	2.21392	NA	1.58048	1	-0.489548	0.698084	-1.28419	NA	-0.832836	1	0.624304	0.412017	-0.353549	0.871744	0.216687	1
ENSG00000083817	ZNF416	protein_coding	2561	1.65987	0.0537277	0.832795	NA	1.30481	1	0.153682	0.924246	0.75802	NA	0.487267	1	1.27647	0.301967	0.415865	NA	0.909411	1	1.12477	0.236954	1.63905	NA	1.4047	1
ENSG00000083828	ZNF586	protein_coding	3261	-1.24738	0.0273707	-0.507275	0.769353	-0.830381	1	-1.83874	0.00235469	-0.835513	0.592194	-1.25163	1	-1.94647	0.000473642	-2.02074	0.10686	-1.98313	1	-1.76598	0.000841941	0.44107	NA	-0.276103	1
ENSG00000083838	ZNF446	protein_coding	4923	0.765315	0.568967	-0.999321	NA	0.137488	1	-0.477517	0.811913	-2.71492	0.0460615	-1.20005	1	0.81911	0.454915	2.09878	NA	1.5964	1	0.534703	0.638171	1.56729	0.577077	1.14147	1
ENSG00000083844	ZNF264	protein_coding	12532	-1.0817	0.00031608	0.467198	0.658863	-0.108664	1	-1.0632	0.00315929	-0.0866321	0.934228	-0.493816	1	-1.50149	1.54381e-08	0.56484	0.640893	-0.126255	1	-1.38373	2.39034e-10	0.323385	0.791672	-0.29116	1
ENSG00000083845	RPS5	protein_coding	3617	-0.359873	0.478061	-0.0944498	0.946938	-0.221066	1	0.119197	0.891173	0.919425	0.410305	0.574098	1	0.587336	0.523507	1.13986	NA	0.889891	1	1.02891	0.129364	0.264908	0.902226	0.6969	1
ENSG00000083857	FAT1	protein_coding	16177	3.36126	2.88144e-46	2.96949	1.0736e-29	3.17863	5.36801e-30	3.65024	9.03543e-35	3.21452	2.91334e-50	3.44877	4.51771e-35	3.47407	5.43925e-51	3.14583	1.35745e-13	3.31926	6.78725e-14	3.75596	4.82906e-49	3.50644	4.99585e-11	3.63659	2.49792e-11
ENSG00000083896	YTHDC1	protein_coding	7032	0.967063	0.000689507	-0.0569237	0.941204	0.544074	1	1.02375	0.00336972	0.71607	0.198001	0.878096	1	0.940125	0.000476519	-0.686208	0.285084	0.34493	1	0.987299	1.22059e-05	0.288462	0.829672	0.679787	1
ENSG00000083937	CHMP2B	protein_coding	3106	-1.40045	0.0374582	-0.31653	NA	-0.759001	1	-1.17538	0.129681	-0.477138	0.796146	-0.784424	1	-1.08191	0.096983	0.233752	NA	-0.279029	1	-1.41568	0.0349184	-1.37628	NA	-1.39584	1
ENSG00000084070	SMAP2	protein_coding	3631	0.0736874	0.929548	0.919734	0.601136	0.557861	1	0.323387	0.763544	-0.210812	0.905885	0.0808728	1	-0.426298	0.433294	-0.37841	0.797902	-0.402156	1	0.149335	0.767299	0.0465358	0.980264	0.0988509	1
ENSG00000084072	PPIE	protein_coding	8071	0.474204	0.610727	0.646115	NA	0.562719	1	1.47482	0.19475	1.73254	0.39504	1.60942	1	0.317285	0.846394	1.64722	NA	1.13037	1	0.503809	0.539054	0.148338	NA	0.336994	1
ENSG00000084073	ZMPSTE24	protein_coding	3572	-1.62493	0.00563737	1.98466	NA	1.09826	1	-1.17155	0.216791	-0.265872	0.914945	-0.648778	1	-1.93542	0.0105696	-1.06487	NA	-1.43545	1	-1.27015	0.0297171	0.732612	NA	0.0539878	1
ENSG00000084090	STARD7	protein_coding	4414	-0.0221512	0.966691	1.09789	0.167209	0.643935	1	0.116754	0.845589	-0.365917	0.617109	-0.10449	1	0.126926	0.807396	0.682326	0.549256	0.43119	1	0.48366	0.189687	0.394643	0.716976	0.439838	1
ENSG00000084092	NOA1	protein_coding	3415	1.62387	0.00362758	1.71834	0.222394	1.67188	1	1.42666	0.123155	0.436507	0.795739	1.01491	1	1.67547	0.0391343	1.72493	NA	1.70042	1	1.95445	0.00146862	1.82662	NA	1.89195	1
ENSG00000084093	REST	protein_coding	7983	0.336189	0.244339	1.55364	0.0028391	1.0697	1	0.792463	0.0794797	1.27507	0.0350837	1.05385	1	0.561928	0.223899	1.57952	0.277021	1.15864	1	0.798378	0.0678567	2.41428	0.0555912	1.82165	1
ENSG00000084110	HAL	protein_coding	5146	0.697005	NA	-4.93842	NA	-0.27426	1	-0.817568	0.829659	-1.19727	NA	-0.994962	1	-0.319659	NA	-4.63287	NA	-1.24885	1	0.543115	NA	-1.19425	NA	-0.0784654	1
ENSG00000084112	SSH1	protein_coding	14537	0.0303076	0.959853	-0.197131	0.857997	-0.0789343	1	-0.537299	0.352169	-0.594994	0.552877	-0.565858	1	0.694424	0.0669756	0.417634	0.717627	0.562657	1	0.852511	0.00299516	1.15792	0.256868	1.01328	1
ENSG00000084207	GSTP1	protein_coding	1915	0.273224	0.6346	-1.36785	0.0533525	-0.325562	1	0.992969	0.12663	0.0933867	0.945977	0.612186	1	1.07959	0.0844996	-0.981698	0.407887	0.389467	1	1.34715	0.00976396	0.893043	0.600426	1.13789	1
ENSG00000084234	APLP2	protein_coding	7451	0.0802239	0.809849	-0.38397	0.537874	-0.133284	1	0.767072	0.0313822	-0.0557115	0.936153	0.413557	1	0.00710678	0.985949	-1.08723	0.0770235	-0.438695	1	0.245695	0.424799	0.0637005	0.960153	0.157566	1
ENSG00000084444	FAM234B	protein_coding	6807	-1.11762	0.0387912	-0.549926	0.708226	-0.806029	1	0.18553	0.851256	0.71389	0.642636	0.473764	1	-0.333406	0.620545	0.679939	NA	0.260467	1	-0.281415	0.565447	1.07752	0.50538	0.55247	1
ENSG00000084453	SLCO1A2	protein_coding	11520	-2.55292	0.00405396	-1.82071	NA	-2.14085	1	-1.58953	0.129681	0.85368	NA	0.0971948	1	-1.98053	0.129329	-2.57876	NA	-2.24886	1	-1.89918	0.0126669	-1.29922	NA	-1.56823	1
ENSG00000084463	WBP11	protein_coding	5315	1.26544	0.000248028	0.347144	0.646903	0.878158	1	1.7012	5.19203e-05	0.710116	0.252928	1.28914	1	1.50114	4.11496e-06	0.130856	0.913561	0.972917	1	1.68013	2.27928e-10	1.10254	0.342976	1.42005	1
ENSG00000084623	EIF3I	protein_coding	1725	1.02086	0.023676	0.67729	0.606191	0.859276	1	1.42125	0.013491	1.59024	0.140329	1.50822	1	1.24388	0.143831	0.372982	0.874839	0.873172	1	1.74653	0.00301251	1.45261	0.420288	1.60704	1
ENSG00000084628	NKAIN1	protein_coding	2987	-0.372859	0.509623	-1.39386	0.127683	-0.794864	1	-0.22272	0.825258	0.719745	0.67699	0.324142	1	0.135893	0.846093	-0.247844	0.87859	-0.0432546	1	0.329264	0.454386	-0.937162	0.370032	-0.169233	1
ENSG00000084636	COL16A1	protein_coding	9269	-1.73484	0.534592	-3.68903	NA	-2.40363	1	-0.125404	0.973222	-0.936462	NA	-0.474672	1	1.25862	0.691084	1.04562	NA	1.15605	1	1.74717	NA	-0.180777	NA	1.0838	1
ENSG00000084652	TXLNA	protein_coding	5103	-0.246894	0.579655	-0.406614	0.645161	-0.324545	1	0.418293	0.479017	-0.467522	0.564063	0.0423303	1	0.107187	0.852498	1.17051	0.355442	0.734673	1	0.352922	0.365914	0.354932	0.794495	0.353928	1
ENSG00000084674	APOB	protein_coding	14828	0.875196	0.635779	1.27399	NA	1.08833	1	0.397627	0.874527	0.925216	NA	0.685405	1	1.78509	NA	-2.33548	NA	0.865728	1	-0.0344524	0.990774	-0.554057	NA	-0.270987	1
ENSG00000084676	NCOA1	protein_coding	8633	1.66446	6.82821e-09	0.824478	0.141734	1.30475	1	1.24493	0.00090326	1.50055	0.00812284	1.37839	0.00451305	1.80754	6.64888e-14	1.38837	0.0382955	1.61312	0.0191478	1.90012	8.73407e-17	1.75385	0.0426029	1.82884	0.0213015
ENSG00000084693	AGBL5	protein_coding	5283	1.42595	0.00136695	1.63816	0.0478368	1.53596	0.0246019	1.51575	0.00706522	1.17024	0.161883	1.35331	1	1.53895	0.00385264	2.13393	0.181607	1.8669	1	1.72295	8.04329e-06	2.24059	0.0891935	2.00486	1
ENSG00000084710	EFR3B	protein_coding	10591	0.751454	0.00700332	0.323579	0.60066	0.553321	1	0.395638	0.474986	-0.288356	0.678045	0.0938028	1	0.871864	0.000508316	1.53673	0.0197207	1.24226	0.0101145	1.06695	5.67773e-06	0.818669	0.304697	0.948143	1
ENSG00000084731	KIF3C	protein_coding	6403	2.34148	2.4809e-15	1.46879	0.0117137	1.97014	0.00585685	2.23903	2.61456e-07	0.697279	0.287773	1.66499	1	2.33568	3.4557e-26	0.158658	0.840773	1.6239	1	2.27688	3.01042e-32	0.633621	0.401092	1.67756	1
ENSG00000084733	RAB10	protein_coding	3631	-1.47023	5.62024e-07	-0.99533	0.147352	-1.21333	1	-1.37522	0.000788141	-1.36759	0.0239204	-1.3714	1	-1.37885	9.72155e-06	-1.20885	0.139814	-1.29135	1	-1.33944	2.29083e-07	-1.47055	0.0810344	-1.4035	1
ENSG00000084734	GCKR	protein_coding	3146	1.33331	NA	-1.12258	NA	0.574866	1	0.126166	NA	-2.38834	NA	-0.641163	1	-0.620694	NA	-1.28656	NA	-0.915548	1	0.648029	NA	-3.17293	NA	-0.253338	1
ENSG00000084754	HADHA	protein_coding	3811	2.30746	9.09193e-15	2.46093	1.83043e-05	2.38623	9.15214e-06	2.54127	7.95895e-11	2.71213	5.66332e-05	2.62923	2.83166e-05	3.01391	9.80473e-17	1.44461	0.0961207	2.43288	1	2.83101	1.01342e-24	2.59165	0.0125015	2.71629	0.00625073
ENSG00000084764	MAPRE3	protein_coding	3459	0.628634	0.453756	-1.1791	0.357817	-0.00888071	1	0.45252	0.77473	-1.64137	0.222894	-0.243847	1	-0.125848	0.844093	-1.36583	0.098095	-0.616529	1	0.181411	0.676357	-1.4307	0.0970334	-0.41029	1
ENSG00000084774	CAD	protein_coding	8422	2.92233	1.28099e-44	2.77206	5.38076e-14	2.84915	2.69038e-14	3.57238	6.35897e-28	3.23648	4.71997e-22	3.41418	2.35999e-22	2.79673	8.59177e-18	2.9849	0.000319592	2.89388	0.000159796	3.15182	1.66554e-21	3.42782	0.000544152	3.29641	0.000272076
ENSG00000085063	CD59	protein_coding	4942	-1.70288	0.00311867	-0.454921	NA	-0.94797	1	-1.78099	0.0224887	-2.02711	0.0704059	-1.89881	1	-1.56813	0.0173029	1.23398	NA	0.42728	1	-1.34327	0.0126139	1.08144	NA	0.327848	1
ENSG00000085117	CD82	protein_coding	4054	-1.03247	0.195582	-1.07172	0.554461	-1.05196	1	-0.331453	0.884909	-0.96501	0.670465	-0.613729	1	-2.00043	0.550267	-1.28656	NA	-1.59979	1	0.93149	0.636781	0.330231	NA	0.661959	1
ENSG00000085185	BCORL1	protein_coding	7996	1.89079	4.80293e-14	1.56515	0.00746111	1.73713	0.00373056	2.6842	2.45653e-14	1.18786	0.00853923	2.12191	0.00426962	2.23151	3.06665e-16	1.81975	0.0122248	2.04027	0.0061124	2.49046	1.57483e-20	1.24668	0.129399	1.99865	1
ENSG00000085224	ATRX	protein_coding	19302	2.37489	8.10825e-27	1.95532	1.33791e-07	2.18031	6.68954e-08	1.8833	1.62662e-14	2.02722	4.29059e-11	1.95705	2.14611e-11	2.76182	4.68362e-54	0.981541	0.0891145	2.13045	1	2.63226	3.42606e-61	1.17692	0.114393	2.08081	1
ENSG00000085231	AK6	protein_coding	2162	-1.00342	0.310882	-1.10218	NA	-1.05195	1	-1.46121	0.389116	0.910577	NA	0.16542	1	-1.70143	0.250434	0.551648	NA	-0.173613	1	-2.67454	0.015059	-2.86113	NA	-2.76482	1
ENSG00000085265	FCN1	protein_coding	4981	1.72135	0.466113	-2.21995	NA	0.812333	1	1.91597	0.544797	-1.70271	NA	1.02888	1	4.60323	0.0623741	-1.77911	NA	3.62043	1	2.62031	NA	-2.22396	NA	1.66968	1
ENSG00000085274	MYNN	protein_coding	5730	-0.513965	0.381681	0.382942	0.822425	0.00309399	1	-0.35934	0.651426	0.751326	0.599813	0.300335	1	-0.713719	0.219942	-0.109915	0.95365	-0.380456	1	-0.967262	0.031752	0.411332	0.853297	-0.119206	1
ENSG00000085276	MECOM	protein_coding	9103	1.66307	7.65958e-06	0.516538	0.60022	1.20082	1	2.67301	0.0294033	-0.064954	0.975537	1.87452	1	2.37543	0.010467	-0.44356	NA	1.56662	1	1.21517	0.31332	0.173047	NA	0.786229	1
ENSG00000085365	SCAMP1	protein_coding	5106	-1.78579	1.67127e-07	0.423214	0.771279	-0.294306	1	-1.83039	0.000362026	-0.140832	0.92951	-0.751241	1	-2.51809	1.9697e-19	-0.171384	0.917164	-0.912449	1	-1.86508	1.94295e-13	-0.96869	0.36575	-1.34836	1
ENSG00000085377	PREP	protein_coding	3762	2.53062	1.64319e-12	3.13885	0.000372566	2.86655	0.000186283	2.71189	8.91359e-09	2.46024	0.00135255	2.59154	0.000676278	1.83096	0.000135669	2.82557	0.0600504	2.41233	1	2.84875	1.35019e-11	2.25815	0.0887072	2.58346	1
ENSG00000085382	HACE1	protein_coding	9238	0.274038	0.521818	1.63499	0.0532981	1.10937	1	0.14567	0.81767	0.625222	0.453655	0.40528	1	0.157613	0.818521	0.387312	0.801565	0.277029	1	0.0364608	0.937145	0.38614	0.794565	0.221869	1
ENSG00000085415	SEH1L	protein_coding	10481	-1.56963	9.26661e-05	-0.325696	0.822425	-0.817551	1	-1.12234	0.0400328	0.325667	0.848766	-0.223819	1	-2.10091	7.54955e-06	0.792973	NA	-0.0249181	1	-1.72424	3.65561e-06	1.23055	NA	0.405567	1
ENSG00000085433	WDR47	protein_coding	4423	1.93811	2.12285e-07	1.9612	0.0144335	1.9497	0.00721685	1.09027	0.0613103	1.42605	0.14724	1.2679	1	1.74208	1.04268e-09	1.02865	0.195423	1.42902	1	1.66829	5.26741e-11	1.93244	0.0862926	1.8064	1
ENSG00000085449	WDFY1	protein_coding	5516	-0.801239	0.0355398	-0.126811	0.916938	-0.424969	1	-0.23963	0.676143	0.781445	0.418107	0.359417	1	-1.15909	0.00360409	1.34832	NA	0.582048	1	-0.584646	0.0995356	0.0996896	0.949903	-0.202276	1
ENSG00000085465	OVGP1	protein_coding	2567	-0.127442	0.959853	-0.00417865	NA	-0.0644945	1	-0.671107	0.826507	1.31049	NA	0.636118	1	-2.77347	0.282903	-1.7071	NA	-2.14393	1	-0.757497	0.644667	-1.16575	NA	-0.947229	1
ENSG00000085491	SLC25A24	protein_coding	6548	0.206175	0.624668	0.500584	0.600837	0.360877	1	0.647336	0.258551	0.827956	0.366306	0.740471	1	0.33929	0.503191	1.71181	0.196474	1.18296	1	0.347905	0.34243	1.94279	0.119959	1.35535	1
ENSG00000085511	MAP3K4	protein_coding	7522	2.02349	1.44042e-14	2.00032	5.20005e-05	2.01195	2.60002e-05	1.60862	3.50586e-05	0.847643	0.146492	1.27774	1	1.82834	1.36501e-07	0.763229	0.470208	1.39192	1	2.10157	3.58629e-14	1.39708	0.18498	1.79191	1
ENSG00000085514	PILRA	protein_coding	2006	-1.93531	NA	-1.40845	NA	-1.64796	1	-1.05113	NA	-4.31674	NA	-1.90841	1	-1.4085	NA	-1.55495	NA	-1.47987	1	-2.54075	NA	NA	NA	0	1
ENSG00000085552	IGSF9	protein_coding	6628	1.59598	0.000398272	0.0316162	0.978251	1.01619	1	1.6967	0.000885649	-0.415044	0.653341	0.996965	1	1.16398	0.0242543	-1.24754	0.157145	0.412464	1	1.40807	0.000128848	-0.0860566	0.949179	0.846359	1
ENSG00000085563	ABCB1	protein_coding	5806	1.02165	NA	-0.87661	NA	0.364507	1	0.305295	NA	-1.18371	NA	-0.255072	1	1.40792	NA	-0.487418	NA	0.751395	1	0.150624	NA	-2.6352	NA	-0.654022	1
ENSG00000085644	ZNF213	protein_coding	6443	0.823583	0.337483	0.547584	NA	0.692173	1	0.791733	0.54878	-0.331913	0.879433	0.336646	1	0.820963	0.393099	1.38801	NA	1.13217	1	0.555019	0.445942	2.29641	NA	1.6739	1
ENSG00000085662	AKR1B1	protein_coding	3660	0.464136	0.474788	0.307648	0.847161	0.388013	1	0.803787	0.56957	-0.375542	0.848659	0.331415	1	0.487383	0.648124	-1.04103	NA	-0.0832325	1	0.892026	0.33573	0.0477073	NA	0.530771	1
ENSG00000085719	CPNE3	protein_coding	6745	-0.161558	0.707873	1.08054	0.209748	0.589233	1	-0.21712	0.681583	1.01159	0.209226	0.524272	1	-0.743817	0.181035	1.79487	NA	1.02396	1	-0.499684	0.173392	1.98956	0.16612	1.22602	1
ENSG00000085721	RRN3	protein_coding	4156	0.395512	0.415887	1.30448	0.249658	0.920427	1	0.562096	0.310897	1.85528	0.0516994	1.34898	1	-0.0328503	0.959067	1.89682	0.195287	1.23309	1	0.215453	0.612588	1.78496	0.140016	1.20388	1
ENSG00000085733	CTTN	protein_coding	6949	0.338335	0.359955	0.576254	0.446802	0.462193	1	0.0645402	0.911814	-0.48198	0.440344	-0.182994	1	0.174992	0.694139	-0.479227	0.637115	-0.115347	1	0.340448	0.285899	0.408658	0.71981	0.374956	1
ENSG00000085741	WNT11	protein_coding	2401	2.51516	NA	-1.47787	NA	1.60303	1	-1.72164	NA	NA	NA	0	1	0.170514	NA	-1.26744	NA	-0.376268	1	1.79437	NA	-0.952277	NA	0.994745	1
ENSG00000085760	MTIF2	protein_coding	3374	2.24884	1.35688e-08	1.1432	0.186976	1.79944	1	2.27283	5.59213e-05	2.21997	0.0328064	2.24664	0.0164312	2.58856	8.47719e-06	2.37235	0.128375	2.4845	1	2.18877	2.01065e-07	1.87119	0.195118	2.0387	1
ENSG00000085788	DDHD2	protein_coding	10686	0.215792	0.59544	0.254957	0.74342	0.235507	1	0.803285	0.0412795	0.853337	0.0888095	0.828528	1	-0.249578	0.516161	0.597543	0.564952	0.235286	1	0.317267	0.329057	0.995465	0.294297	0.695856	1
ENSG00000085831	TTC39A	protein_coding	9362	0.312609	0.906619	-1.32619	NA	-0.285625	1	-0.130092	NA	-1.76355	NA	-0.727027	1	-0.0159566	NA	-3.60796	NA	-0.90102	1	-1.71717	0.510989	-0.902574	NA	-1.25313	1
ENSG00000085832	EPS15	protein_coding	7440	0.0346131	0.937784	0.290336	0.717823	0.168133	1	-0.0468845	0.940504	0.38283	0.642426	0.183913	1	-0.146034	0.711852	0.699116	0.476045	0.337563	1	0.0202233	0.953357	1.65227	0.16582	1.05568	1
ENSG00000085840	ORC1	protein_coding	3157	1.90666	1.48305e-05	2.57286	0.0134277	2.27787	0.00672129	2.36387	0.00296493	1.2962	0.343039	1.92663	1	1.93685	0.0284713	2.17198	NA	2.0592	1	1.21944	0.188465	1.1214	NA	1.17125	1
ENSG00000085871	MGST2	protein_coding	3182	-0.81334	NA	-1.81336	NA	-1.22839	1	-0.90035	NA	0.0218091	NA	-0.366812	1	1.45133	NA	-1.26744	NA	0.655353	1	-0.272066	NA	-1.55778	NA	-0.7762	1
ENSG00000085872	CHERP	protein_coding	6113	1.30559	0.000235331	1.16673	0.143798	1.23783	1	1.55453	0.000216969	0.0914167	0.917724	1.00101	1	1.96916	8.97813e-06	1.01315	0.308521	1.56893	1	1.92002	1.86775e-08	0.665761	0.572264	1.4251	1
ENSG00000085978	ATG16L1	protein_coding	6047	1.15656	0.0583454	1.33318	0.398088	1.24757	1	0.986227	0.209266	3.13413	0.0606125	2.42766	1	0.660398	0.306081	1.41978	NA	1.08949	1	1.25228	0.00598883	1.20485	0.433776	1.22876	1
ENSG00000085982	USP40	protein_coding	9352	1.30638	0.000100301	1.5868	0.0420199	1.45339	0.0210601	1.34005	0.00672706	1.00415	0.162381	1.18186	1	0.712498	0.152269	-0.697738	0.524684	0.173241	1	0.790235	0.0274244	-0.290898	0.814684	0.348657	1
ENSG00000085998	POMGNT1	protein_coding	6198	1.54686	4.86566e-05	1.21621	0.180812	1.39098	1	1.88996	0.00039278	0.86333	0.237913	1.4661	1	0.999486	0.0392091	0.208754	0.893006	0.65763	1	1.70484	2.76019e-05	0.901093	0.42261	1.35823	1
ENSG00000085999	RAD54L	protein_coding	3212	0.944451	0.0306436	1.65494	0.126062	1.343	1	0.543554	0.515505	-0.373723	0.786105	0.156621	1	0.646191	0.585509	2.7431	NA	2.04616	1	0.758826	0.362897	3.10055	NA	2.3603	1
ENSG00000086015	MAST2	protein_coding	7877	2.19973	3.13224e-15	2.26368	0.000640538	2.23206	0.000320269	1.84298	1.6671e-05	0.767573	0.212747	1.40324	1	2.67686	2.3624e-23	1.45702	0.127479	2.1922	1	2.89766	2.67789e-28	1.94623	0.0094627	2.49899	0.00473135
ENSG00000086061	DNAJA1	protein_coding	2730	1.00257	0.000200437	0.597177	0.329249	0.814064	1	1.47365	7.86343e-05	1.14759	0.0472934	1.31982	0.023686	0.564107	0.05163	0.0360031	0.971994	0.324085	1	1.30389	1.32028e-06	1.17263	0.252444	1.23975	1
ENSG00000086062	B4GALT1	protein_coding	4901	-1.80946	0.00122268	-0.498267	NA	-1.00977	1	-0.456281	0.652422	-0.681394	0.617936	-0.564451	1	-0.613563	0.595341	3.28457	NA	2.37823	1	-0.666776	0.31818	-1.02805	0.525505	-0.836132	1
ENSG00000086065	CHMP5	protein_coding	2390	-0.473993	0.491537	-0.132418	0.94556	-0.29312	1	-0.930249	0.264536	-0.897582	0.53785	-0.913823	1	-0.94592	0.202978	-2.45358	0.0228544	-1.51117	1	-1.02815	0.0413082	-1.67075	0.179251	-1.31396	1
ENSG00000086102	NFX1	protein_coding	7147	2.09914	3.09715e-12	1.99411	0.00323836	2.04758	0.00161918	1.58602	0.000218145	1.56744	0.0125482	1.57676	0.00638317	1.7212	6.26128e-07	2.56525	0.0142513	2.20409	0.00712598	2.04397	8.72663e-13	1.82791	0.0465815	1.93998	0.0232908
ENSG00000086159	AQP6	protein_coding	5129	NA	NA	NA	NA	0	1	-0.572873	NA	-1.4401	NA	-0.942281	1	-0.349544	NA	-3.0458	NA	-1.14254	1	NA	NA	NA	NA	0	1
ENSG00000086189	DIMT1	protein_coding	3736	-0.976559	0.273027	0.401711	NA	-0.128737	1	-0.0665104	0.971303	-0.0204101	0.994481	-0.0432762	1	-1.8027	0.303648	0.0762704	NA	-0.57677	1	-0.829103	0.438032	0.494791	NA	-0.0203435	1
ENSG00000086200	IPO11	protein_coding	7540	1.04759	0.00124705	1.92113	0.00935534	1.54949	0.0053012	0.881524	0.0560862	1.45527	0.0403474	1.19673	1	0.82311	0.152363	0.688786	0.674563	0.75751	1	1.08358	0.00608063	1.45037	0.258985	1.2786	1
ENSG00000086205	FOLH1	protein_coding	3824	2.38514	0.369988	-2.72524	NA	1.42631	1	0.668307	NA	-3.71957	0.034764	-0.264377	1	1.48924	NA	-4.02654	NA	0.52043	1	2.87985	NA	-2.17411	NA	1.92264	1
ENSG00000086232	EIF2AK1	protein_coding	5550	0.922251	0.00419592	0.582653	0.361927	0.762421	1	1.50203	0.000301065	1.44183	0.00623487	1.47225	0.00326797	1.12115	0.000520962	0.554733	0.564933	0.865565	1	1.54555	4.09611e-10	1.77126	0.0452056	1.66281	0.0226028
ENSG00000086288	NME8	protein_coding	2439	0.379548	0.899807	-1.78692	NA	-0.330315	1	-1.40227	0.711065	-1.39786	NA	-1.40006	1	0.959069	NA	0.233736	NA	0.641514	1	-1.52259	NA	-3.60387	NA	-2.21656	1
ENSG00000086289	EPDR1	protein_coding	2864	-1.01367	0.306661	-1.0244	NA	-1.01903	1	-0.546478	0.738613	1.07493	NA	0.480943	1	-1.23389	0.606284	-0.387236	NA	-0.749326	1	-0.768985	0.658839	1.19426	NA	0.523611	1
ENSG00000086300	SNX10	protein_coding	3518	-1.38233	0.0297582	0.625448	NA	-0.0541755	1	-1.20182	0.316858	0.787149	NA	0.111289	1	-2.18143	0.00490911	-0.541018	NA	-1.13964	1	-1.04914	0.194825	2.25451	NA	1.39369	1
ENSG00000086475	SEPHS1	protein_coding	3888	0.188607	0.706507	0.497786	0.628871	0.351463	1	0.907928	0.176483	0.338566	0.785194	0.651154	1	0.418156	0.500303	3.24532	NA	2.43551	1	0.338741	0.526365	1.03185	0.558035	0.726523	1
ENSG00000086504	MRPL28	protein_coding	2404	1.42235	0.0432923	1.92147	NA	1.69339	1	1.40746	0.168811	0.7143	0.694521	1.10211	1	0.187422	0.907449	0.0297237	NA	0.110727	1	1.50781	0.129968	2.50692	NA	2.09218	1
ENSG00000086506	HBQ1	protein_coding	536	0.435772	NA	-1.37783	NA	-0.203043	1	1.71405	NA	-0.264953	NA	1.0402	1	NA	NA	NA	NA	0	1	0.9398	NA	-1.81579	NA	0.139019	1
ENSG00000086544	ITPKC	protein_coding	3385	2.77917	2.99467e-06	2.32243	0.128461	2.5688	1	2.27405	0.004667	1.99448	0.142203	2.14102	1	2.39131	0.00223374	1.65731	NA	2.07049	1	2.2122	0.000191683	0.880814	0.627305	1.69493	1
ENSG00000086548	CEACAM6	protein_coding	3052	-0.0875248	NA	NA	NA	0	1	NA	NA	NA	NA	0	1	NA	NA	NA	NA	0	1	0.9398	NA	-1.81579	NA	0.139019	1
ENSG00000086570	FAT2	protein_coding	14537	3.12722	0.145044	-0.208728	NA	2.26345	1	2.93948	NA	-1.90821	NA	1.98873	1	3.52164	0.157712	-0.0176509	NA	2.64069	1	0.106627	NA	-3.033	NA	-0.738311	1
ENSG00000086589	RBM22	protein_coding	3615	1.24008	0.0058498	2.39836	0.0336218	1.93247	0.0197358	1.5545	0.00656208	2.63937	0.0098055	2.19659	0.00818379	1.33966	0.008161	2.18507	0.123544	1.82343	1	1.39967	0.000451707	0.46553	0.747319	1.00692	1
ENSG00000086598	TMED2	protein_coding	3830	-1.55779	3.55581e-05	-0.932307	0.294344	-1.21141	1	-1.808	3.37828e-06	-1.41249	0.029351	-1.59674	1	-2.01561	6.71203e-08	-1.30046	0.288128	-1.61417	1	-1.78476	2.50523e-08	-1.07952	0.342817	-1.38947	1
ENSG00000086619	ERO1B	protein_coding	5361	-2.02493	0.230274	-1.52251	NA	-1.75196	1	-1.17273	0.22132	0.54637	NA	-0.0709753	1	-1.96037	0.174656	0.367883	NA	-0.370135	1	-0.867278	0.330326	1.36111	NA	0.640161	1
ENSG00000086666	ZFAND6	protein_coding	5153	-1.31061	0.00730597	0.187711	0.926241	-0.375098	1	-0.984791	0.126988	1.00969	0.573193	0.332721	1	-0.968899	0.116524	0.124109	NA	-0.32127	1	-1.24477	0.00958048	1.07393	NA	0.337503	1
ENSG00000086696	HSD17B2	protein_coding	9550	NA	NA	NA	NA	0	1	NA	NA	NA	NA	0	1	-0.319659	NA	NA	NA	0	1	NA	NA	NA	NA	0	1
ENSG00000086712	TXLNG	protein_coding	4460	-0.00406204	0.99637	-0.365391	0.821175	-0.173444	1	-0.0770889	0.955122	-1.01956	0.433355	-0.472694	1	0.467106	0.549231	-0.74398	0.633884	-0.01492	1	-0.0511289	0.942476	-0.637729	0.708	-0.314818	1
ENSG00000086717	PPEF1	protein_coding	3513	3.6237	0.167212	-0.638493	NA	2.697	1	0.983049	0.769343	-0.698107	NA	0.374633	1	-0.124024	0.96433	0.537756	NA	0.244484	1	1.1574	0.509425	-0.0754439	NA	0.668843	1
ENSG00000086730	LAT2	protein_coding	4545	-0.441682	NA	NA	NA	0	1	-0.505204	NA	-1.53274	NA	-0.929362	1	-1.46612	NA	-1.3335	NA	-1.39829	1	-1.37648	NA	-3.24117	NA	-2.02646	1
ENSG00000086758	HUWE1	protein_coding	17380	3.94903	4.47554e-90	3.23464	6.82855e-39	3.63561	3.41428e-39	3.93072	4.74359e-76	3.50081	7.9492e-67	3.73172	3.9746e-67	4.14656	2.13616e-131	2.66869	4.20085e-12	3.58913	2.10043e-12	4.51037	2.35004e-162	3.12163	2.05467e-09	3.97702	1.02734e-09
ENSG00000086827	ZW10	protein_coding	2992	1.63231	0.000139106	1.18835	0.245854	1.42734	1	1.21774	0.0650985	-0.135272	0.917406	0.694357	1	1.64277	0.028263	0.612869	NA	1.21784	1	1.29104	0.0214599	1.25145	0.492896	1.27138	1
ENSG00000086848	ALG9	protein_coding	8013	0.00290744	0.999154	0.666837	NA	0.372732	1	0.332654	NA	-0.794402	NA	-0.123505	1	-0.337843	NA	-1.68167	NA	-0.858638	1	0.403933	0.867199	0.998988	NA	0.731925	1
ENSG00000086967	MYBPC2	protein_coding	3708	3.24948	0.0768408	-0.0848336	NA	2.38586	1	2.50781	0.292602	-1.50593	NA	1.59447	1	2.77637	NA	0.242812	NA	2.00622	1	2.13735	NA	-1.30714	NA	1.26413	1
ENSG00000086991	NOX4	protein_coding	6096	-1.40974	0.277729	0.935634	NA	0.194788	1	-0.797344	0.676177	-0.345625	NA	-0.553877	1	-2.54356	0.259806	-0.487418	NA	-1.17654	1	-3.26499	0.0350611	-2.41445	NA	-2.77792	1
ENSG00000087008	ACOX3	protein_coding	3846	0.229472	0.823265	-0.41442	NA	-0.0568461	1	1.41768	0.192149	0.172351	0.930388	0.925412	1	0.161026	0.870728	0.333969	NA	0.250087	1	1.35187	0.0143088	-0.546378	0.716976	0.694729	1
ENSG00000087053	MTMR2	protein_coding	6119	0.472209	0.225408	1.37251	0.0813766	0.991477	1	0.517684	0.297127	2.54187	0.00302232	1.85899	1	0.412131	0.351542	1.89727	0.115001	1.33792	1	0.54181	0.075373	0.952591	0.344902	0.761772	1
ENSG00000087074	PPP1R15A	protein_coding	3093	3.40621	8.05232e-19	0.675898	0.398088	2.60872	1	2.71188	6.11864e-06	1.61182	0.0921936	2.26426	1	2.96398	2.3132e-19	0.931741	0.304413	2.27952	1	3.24828	1.29884e-23	2.85788	0.00481657	3.06625	0.00240829
ENSG00000087076	HSD17B14	protein_coding	1281	-1.27776	0.322367	0.476653	NA	-0.148843	1	-0.331612	0.844686	-0.498924	NA	-0.412844	1	-1.45702	0.633595	-0.510974	NA	-0.907801	1	-0.569464	0.715974	1.69461	NA	0.967448	1
ENSG00000087077	TRIP6	protein_coding	2802	1.2908	0.0384867	0.28011	0.861528	0.872211	1	1.93962	0.022149	1.68166	0.19982	1.8164	1	0.98625	0.514102	0.463848	NA	0.748566	1	0.392571	0.651356	3.92536	NA	3.04492	1
ENSG00000087085	ACHE	protein_coding	3731	1.22164	0.349444	0.423045	NA	0.876908	1	0.676744	0.656357	0.690434	NA	0.683605	1	0.986507	0.238584	-1.54087	0.189315	0.217268	1	1.33272	0.00542887	-0.1522	0.931499	0.773427	1
ENSG00000087086	FTL	protein_coding	878	-1.25972	0.00224861	-1.21519	0.105254	-1.23728	1	-0.78207	0.209404	-0.0318775	0.981882	-0.358752	1	0.342403	0.628579	0.684965	0.666628	0.523828	1	-0.184647	0.726269	0.0144554	0.992591	-0.081664	1
ENSG00000087087	SRRT	protein_coding	4850	1.40827	8.27106e-05	0.403806	0.661606	0.991744	1	0.71688	0.334388	0.28448	0.81792	0.516819	1	1.41764	3.2252e-05	-0.659553	0.430871	0.724454	1	1.26752	0.000176508	-0.860209	0.344422	0.564793	1
ENSG00000087088	BAX	protein_coding	2587	-0.347226	0.651585	-0.762742	0.598918	-0.540076	1	0.351393	0.722402	-0.736226	0.520152	-0.0922637	1	-1.02902	0.195132	-0.724118	NA	-0.868531	1	-0.513906	0.52357	1.04824	NA	0.469016	1
ENSG00000087095	NLK	protein_coding	5290	-1.12031	0.00234376	0.0746821	0.959861	-0.402471	1	-1.61986	2.73827e-05	-1.32915	0.0458592	-1.4672	1	-0.590599	0.0761264	0.961651	0.359387	0.384936	1	-0.696898	0.0168541	0.192472	0.888689	-0.184739	1
ENSG00000087111	PIGS	protein_coding	5990	-0.367336	0.572926	0.521587	0.770231	0.144533	1	0.907128	0.238465	0.125178	0.929283	0.568494	1	0.76212	0.309619	1.36881	NA	1.09713	1	0.987789	0.073458	-0.415488	0.794565	0.450438	1
ENSG00000087116	ADAMTS2	protein_coding	8726	0.750026	0.462027	-0.438283	NA	0.274909	1	1.17101	0.453988	-0.0423867	NA	0.688291	1	0.0812237	0.975663	1.30688	NA	0.820477	1	0.899703	0.704792	-1.15313	NA	0.211218	1
ENSG00000087128	TMPRSS11E	protein_coding	2138	NA	NA	NA	NA	0	1	NA	NA	NA	NA	0	1	NA	NA	NA	NA	0	1	NA	NA	NA	NA	0	1
ENSG00000087152	ATXN7L3	protein_coding	5301	1.04179	0.0119574	0.144597	0.898248	0.661843	1	0.888051	0.126988	2.73934	0.0135945	2.09226	1	1.56	4.09967e-07	1.369	0.0943513	1.46765	1	1.50878	5.73624e-08	0.985904	0.334977	1.2709	1
ENSG00000087157	PGS1	protein_coding	4965	0.264241	0.75751	0.882264	NA	0.606096	1	0.228247	0.84861	1.1756	0.506759	0.778326	1	0.0823026	0.935914	1.69518	NA	1.10329	1	-0.012054	0.988898	-0.79075	0.6519	-0.34949	1
ENSG00000087191	PSMC5	protein_coding	4490	1.51184	0.000238515	0.527906	0.601149	1.10218	1	2.43861	5.34468e-06	1.23717	0.19285	1.9595	1	1.30142	0.00405153	-0.959129	0.275331	0.574867	1	2.00619	2.32002e-06	0.162064	0.902428	1.36067	1
ENSG00000087206	UIMC1	protein_coding	4739	0.837815	0.106922	0.689953	0.592251	0.765777	1	-0.0853668	0.934053	1.40047	0.396313	0.840936	1	-0.0882637	0.923865	-0.290771	NA	-0.185967	1	-0.308433	0.634938	-0.558145	0.76404	-0.427893	1
ENSG00000087237	CETP	protein_coding	2085	-0.710219	NA	-1.10719	NA	-0.895093	1	-0.966866	NA	-1.4401	NA	-1.18416	1	-0.81259	NA	-1.28656	NA	-1.0302	1	-2.08084	0.506804	-2.39466	NA	-2.22924	1
ENSG00000087245	MMP2	protein_coding	4933	0.439502	0.534482	0.797907	0.596132	0.629806	1	1.51622	0.00281813	0.462939	0.567746	1.08364	1	0.980006	0.321298	0.505881	NA	0.762334	1	1.13714	0.0459112	-1.34417	0.205869	0.374805	1
ENSG00000087250	MT3	protein_coding	1837	NA	NA	NA	NA	0	1	NA	NA	NA	NA	0	1	NA	NA	NA	NA	0	1	NA	NA	NA	NA	0	1
ENSG00000087253	LPCAT2	protein_coding	7439	-1.40612	0.359563	-2.32281	NA	-1.79285	1	-1.31422	0.353894	0.5363	NA	-0.110611	1	-1.13068	0.616457	-0.039649	NA	-0.484397	1	-0.140507	0.919968	1.54257	NA	0.933701	1
ENSG00000087258	GNAO1	protein_coding	13697	0.948699	0.0794692	-0.1884	0.863322	0.489394	1	0.0991901	0.902609	-1.11733	0.136791	-0.384471	1	0.083721	0.862814	-0.704314	0.33298	-0.257147	1	0.40209	0.134921	-0.753493	0.3446	-0.0629672	1
ENSG00000087263	OGFOD1	protein_coding	5806	1.1422	0.0132553	2.64566	0.041767	2.0815	0.0275111	1.15952	0.0594537	2.63712	0.0289791	2.07976	1	0.584501	0.492499	-0.432794	NA	0.163721	1	0.866414	0.11413	1.17513	0.510896	1.02901	1
ENSG00000087266	SH3BP2	protein_coding	13968	-1.00907	0.0288041	-0.939599	0.355791	-0.973917	1	-1.79079	0.00057849	-0.179462	0.9289	-0.770972	1	-0.631898	0.120764	-0.673861	0.544426	-0.652727	1	-0.840267	0.00462065	-0.0876277	0.951861	-0.415413	1
ENSG00000087269	NOP14	protein_coding	3538	2.19834	3.11422e-07	0.918762	0.391392	1.69599	1	2.02515	0.000349026	1.30259	0.159247	1.70864	1	1.37288	0.0296389	0.83967	0.666628	1.13077	1	2.18711	0.000489609	1.16183	0.510917	1.76369	1
ENSG00000087274	ADD1	protein_coding	13106	1.25622	2.54453e-07	0.821197	0.109077	1.05504	1	1.61315	3.55325e-06	1.26655	0.00756654	1.45023	0.00378505	1.37712	8.68444e-08	0.947833	0.210219	1.17838	1	1.58939	4.0751e-14	0.885863	0.261493	1.2801	1
ENSG00000087299	L2HGDH	protein_coding	6879	-0.942549	0.0902141	-0.35391	0.829611	-0.618414	1	-0.772246	0.373952	-0.511463	0.759364	-0.63597	1	-0.796057	0.244813	0.0599514	NA	-0.305475	1	-1.14752	0.0645226	-0.114787	NA	-0.540655	1
ENSG00000087301	TXNDC16	protein_coding	4739	0.434463	0.391512	0.241103	0.853538	0.34102	1	-0.00148665	0.998697	0.413295	0.794516	0.220759	1	-0.756704	0.0581421	-0.607128	0.589795	-0.679979	1	-0.502481	0.161124	-0.947268	0.336502	-0.707801	1
ENSG00000087302	C14orf166	protein_coding	8323	-0.431792	0.312887	-0.419116	0.653367	-0.42544	1	-0.533148	0.332388	-0.748131	0.326895	-0.636639	1	-1.40784	0.00364102	-1.81799	0.082113	-1.59839	1	-1.46413	5.15918e-05	-0.898408	0.501225	-1.15372	1
ENSG00000087303	NID2	protein_coding	6392	0.129226	0.962789	1.02078	NA	0.642807	1	0.40418	0.896431	0.0429341	NA	0.234834	1	-0.143825	NA	-1.96805	NA	-0.784988	1	1.67136	0.574419	0.251941	NA	1.1296	1
ENSG00000087338	GMCL1	protein_coding	4922	-0.343873	0.557228	0.203623	0.890763	-0.0443078	1	-0.403754	0.580836	0.915968	0.53785	0.402026	1	0.131281	0.858413	3.16941	NA	2.33515	1	0.0197173	0.973545	0.892116	0.580108	0.520878	1
ENSG00000087365	SF3B2	protein_coding	9795	3.7848	3.6087e-64	1.19243	0.00285944	3.00613	0.00142972	4.10959	1.49809e-32	2.10769	3.58797e-08	3.43114	1.79398e-08	3.25018	1.26138e-40	0.252483	0.722042	2.42036	1	3.82536	9.54689e-53	0.953887	0.353947	3.01014	1
ENSG00000087448	KLHL42	protein_coding	7622	-1.4215	1.74048e-05	-0.378146	0.735397	-0.807491	1	-1.87247	2.14969e-05	-1.45807	0.0495426	-1.65044	1	-1.19889	7.8035e-05	-0.398776	0.731681	-0.744064	1	-1.30654	2.11885e-07	-0.254577	0.855158	-0.686729	1
ENSG00000087460	GNAS	protein_coding	13320	1.33032	3.15051e-12	1.0256	0.00122723	1.18599	0.000613613	1.31115	0.00017462	1.06342	0.000101869	1.19259	0.000138244	0.41704	0.029373	-0.0715467	0.918504	0.193332	1	0.745372	0.000410178	0.363436	0.657393	0.567006	1
ENSG00000087470	DNM1L	protein_coding	7282	0.0912889	0.834321	0.878041	0.278929	0.537644	1	0.3929	0.400654	1.31868	0.094296	0.928808	1	0.104671	0.832099	-0.1406	0.904357	-0.0127583	1	0.154264	0.663562	0.0281928	0.983282	0.0926052	1
ENSG00000087494	PTHLH	protein_coding	3377	0.708554	NA	-1.7628	NA	-0.0522653	1	-1.48502	0.636681	-1.54475	NA	-1.51457	1	0.354969	NA	-0.120806	NA	0.136606	1	1.25827	NA	-1.5632	NA	0.449162	1
ENSG00000087495	PHACTR3	protein_coding	6095	1.24506	0.695058	-0.775873	NA	0.562826	1	2.58244	NA	-1.03608	NA	1.69536	1	1.48577	0.197777	-2.78558	0.0372228	0.558608	1	1.17997	0.844362	-1.26218	0.873664	0.423652	1
ENSG00000087502	ERGIC2	protein_coding	5826	-1.28906	0.015674	-0.290259	0.870815	-0.704898	1	-1.35757	0.0225196	-0.900064	0.421628	-1.11076	1	-1.81644	8.42621e-05	-1.7117	0.155193	-1.76312	1	-1.54655	1.70834e-05	-1.02693	0.420102	-1.26347	1
ENSG00000087510	TFAP2C	protein_coding	3005	0.44705	0.63714	1.91066	NA	1.35701	1	1.26107	0.636813	1.66374	NA	1.47641	1	0.907963	0.78306	0.798041	NA	0.854049	1	1.4576	NA	-0.733332	NA	0.743308	1
ENSG00000087586	AURKA	protein_coding	2928	-0.299189	0.686612	1.27961	NA	0.696193	1	0.0954707	0.944751	2.63979	NA	1.86806	1	0.167149	0.923422	2.73146	NA	1.95682	1	0.0668936	0.959629	0.422153	NA	0.255431	1
ENSG00000087589	CASS4	protein_coding	5069	0.435772	NA	-3.52831	NA	-0.474627	1	-1.68762	NA	NA	NA	0	1	-1.47003	NA	NA	NA	0	1	-2.27457	NA	-3.49112	NA	-2.75824	1
ENSG00000087842	PIR	protein_coding	2512	-0.118966	0.961874	-0.476706	NA	-0.286776	1	0.298155	NA	0.465577	NA	0.384293	1	-0.296089	NA	-0.487418	NA	-0.388584	1	-0.47443	NA	-0.952277	NA	-0.69366	1
ENSG00000087884	AAMDC	protein_coding	1943	-1.20568	0.484659	-0.224849	NA	-0.633467	1	-0.593336	0.862264	0.277237	NA	-0.0933553	1	-0.712744	0.824862	-1.20976	NA	-0.939952	1	-0.636491	0.692927	0.727701	NA	0.201178	1
ENSG00000087903	RFX2	protein_coding	9094	1.07888	0.0914481	0.535408	0.73513	0.832587	1	1.3685	0.128714	0.240204	0.889281	0.911952	1	2.56233	0.0611307	1.41373	NA	2.09944	1	1.26159	0.0752898	-0.0184801	0.992711	0.759103	1
ENSG00000087995	METTL2A	protein_coding	3843	0.540066	0.371507	1.7562	0.225655	1.27265	1	-0.0614921	0.95854	0.222101	0.908932	0.0872616	1	0.765413	0.202875	1.1467	0.493431	0.968614	1	0.575682	0.240433	2.46631	0.147299	1.81078	1
ENSG00000088002	SULT2B1	protein_coding	2822	2.51516	NA	-1.32499	NA	1.61253	1	-1.34429	NA	-3.21968	NA	-1.99657	1	NA	NA	-3.80381	NA	0	1	NA	NA	NA	NA	0	1
ENSG00000088035	ALG6	protein_coding	4950	-1.23697	0.0660128	0.324336	NA	-0.254676	1	-1.08598	0.191883	-0.121221	0.956938	-0.524415	1	-1.54205	0.0919228	-1.41335	NA	-1.47627	1	-1.3094	0.101332	-0.817246	NA	-1.04244	1
ENSG00000088038	CNOT3	protein_coding	6676	1.03071	0.0273088	-0.296455	0.800011	0.514639	1	0.886456	0.153787	1.04795	0.334955	0.969463	1	0.737331	0.207417	-1.536	0.0993432	0.00857966	1	0.831355	0.0492629	-0.839191	0.441471	0.225468	1
ENSG00000088053	GP6	protein_coding	2703	-0.178818	NA	-1.40845	NA	-0.666412	1	-0.966866	NA	-2.35434	NA	-1.49987	1	0.212282	NA	-1.26744	NA	-0.345642	1	-1.03066	NA	-3.49112	NA	-1.78981	1
ENSG00000088179	PTPN4	protein_coding	12486	-0.834054	0.0274679	-1.0228	0.153524	-0.925342	1	-1.46968	0.00764774	-0.750551	0.499749	-1.06576	1	-0.40251	0.318665	0.65537	0.592272	0.221296	1	-0.621317	0.0593273	0.656193	0.651799	0.154451	1
ENSG00000088205	DDX18	protein_coding	7851	0.629441	0.110118	0.0964383	0.926241	0.387416	1	0.702154	0.104731	1.05034	0.122697	0.886726	1	0.580672	0.252854	-0.471178	0.674563	0.148557	1	0.582754	0.121355	1.41546	0.264057	1.05837	1
ENSG00000088247	KHSRP	protein_coding	4563	1.26936	2.60666e-07	0.776655	0.164446	1.04394	1	1.2945	0.000237945	0.668892	0.154854	1.01534	1	0.454712	0.116732	0.553057	0.532771	0.504722	1	0.792419	0.00157791	0.632794	0.488855	0.714813	1
ENSG00000088256	GNA11	protein_coding	6242	0.448684	0.553148	0.864131	NA	0.67131	1	0.21383	0.85098	-0.594294	0.678504	-0.134373	1	1.13872	0.0409959	0.229733	0.8918	0.754666	1	1.00809	0.0270005	0.088463	0.96153	0.620343	1
ENSG00000088280	ASAP3	protein_coding	4988	1.84497	3.37119e-07	1.22098	0.113167	1.56645	1	2.43636	6.17902e-05	2.23068	0.00489421	2.33718	0.002478	1.52305	0.0161163	2.45675	NA	2.06416	1	1.70662	5.72055e-05	3.7794	0.0227003	3.08706	0.0113787
ENSG00000088298	EDEM2	protein_coding	1919	1.17983	0.205361	0.00643737	NA	0.709278	1	1.73161	0.20225	1.01173	0.668757	1.41611	1	1.77285	0.403475	-0.405959	NA	1.06075	1	0.557553	0.659312	2.04835	NA	1.48751	1
ENSG00000088305	DNMT3B	protein_coding	4630	0.701274	0.0453618	1.08378	0.163601	0.905165	1	0.772663	0.174034	0.923219	0.302695	0.849904	1	0.298388	0.610895	-0.0773522	0.962935	0.122716	1	0.0151166	0.977094	-0.691734	0.558176	-0.295445	1
ENSG00000088320	REM1	protein_coding	1665	NA	NA	NA	NA	0	1	NA	NA	-3.21968	NA	0	1	1.45133	NA	-1.26744	NA	0.655353	1	NA	NA	-3.54255	NA	0	1
ENSG00000088325	TPX2	protein_coding	3605	1.70385	2.4102e-10	0.239	0.772405	1.14986	1	1.73783	1.04262e-05	1.47765	0.0130687	1.6136	0.00653954	1.89046	0.000172757	0.513437	0.788938	1.36036	1	1.83296	1.9146e-06	3.14783	0.0412606	2.63528	0.0206313
ENSG00000088340	FER1L4	transcribed_unitary_pseudogene	9067	-0.348262	0.801974	-2.64341	0.0330486	-1.08073	1	0.0778122	0.973222	-0.602277	NA	-0.222524	1	-0.933312	0.659897	-1.15307	NA	-1.03901	1	-2.06688	0.165481	-1.25236	NA	-1.60288	1
ENSG00000088356	PDRG1	protein_coding	1998	-0.38138	0.739558	0.100953	NA	-0.120149	1	-0.872055	0.493424	0.343094	NA	-0.140156	1	-1.13052	0.357424	-2.61957	NA	-1.6909	1	-0.226704	0.831288	-1.99963	0.192658	-0.856412	1
ENSG00000088367	EPB41L1	protein_coding	9674	1.80082	1.16893e-07	1.41055	0.0680129	1.61884	1	2.01327	7.63798e-06	2.15391	0.00237214	2.0853	0.00118989	1.68898	2.11822e-13	0.797075	0.259386	1.31088	1	1.99176	1.73862e-18	1.20797	0.189763	1.65245	1
ENSG00000088386	SLC15A1	protein_coding	4192	-0.0262819	NA	-3.54752	NA	-0.905802	1	NA	NA	NA	NA	0	1	1.43698	NA	-0.366127	NA	0.800495	1	NA	NA	NA	NA	0	1
ENSG00000088387	DOCK9	protein_coding	14816	1.90797	0.00153899	1.08157	0.455742	1.55315	1	2.44824	0.0392906	0.783137	0.69763	1.84365	1	1.82272	0.00627236	-0.226995	0.901251	1.13484	1	2.52702	0.00741247	0.69812	NA	1.88483	1
ENSG00000088448	ANKRD10	protein_coding	4563	-1.8215	3.93687e-06	-1.19021	0.224037	-1.4716	1	-2.11292	4.49486e-06	-1.69784	0.0472934	-1.8905	1	-1.94224	1.33296e-08	-1.12028	0.303274	-1.4735	1	-1.622	8.10555e-08	-1.58012	0.0722321	-1.60091	1
ENSG00000088451	TGDS	protein_coding	2589	-1.46367	0.0879638	-0.0789401	NA	-0.611179	1	-0.919628	0.302079	-0.499123	0.794516	-0.694109	1	-1.50889	0.481555	-0.453517	NA	-0.886777	1	-1.0186	0.351257	1.07504	NA	0.378718	1
ENSG00000088538	DOCK3	protein_coding	8755	1.78569	1.44479e-08	1.91332	0.00429325	1.85091	0.00214663	1.03595	0.0383222	2.0967	0.0164611	1.6617	0.0273916	2.32878	1.70298e-28	1.75073	0.0016662	2.06851	0.000833098	2.48056	2.14318e-23	1.88107	0.0136766	2.21173	0.00683832
ENSG00000088543	C3orf18	protein_coding	3248	-0.784371	0.5527	2.15813	NA	1.33455	1	0.316821	0.878097	-1.42085	0.392267	-0.30483	1	-0.901237	0.642208	-1.63126	NA	-1.22056	1	-0.970737	0.369187	0.349904	NA	-0.164301	1
ENSG00000088682	COQ9	protein_coding	4324	0.158055	0.888757	-0.896348	NA	-0.27489	1	0.667197	0.690292	0.274174	NA	0.484028	1	-1.26626	0.263887	-1.67652	NA	-1.45686	1	-0.382609	0.690589	0.683332	NA	0.246647	1
ENSG00000088726	TMEM40	protein_coding	3562	0.521439	NA	-1.47167	NA	-0.155252	1	-1.41259	NA	-3.58748	NA	-2.12399	1	0.986614	NA	-0.907264	NA	0.3304	1	-0.741642	NA	NA	NA	0	1
ENSG00000088727	KIF9	protein_coding	5850	1.04145	0.470597	0.466968	NA	0.782615	1	0.703123	0.741403	-1.14518	NA	0.0566924	1	1.62419	0.442254	-0.931189	NA	0.850843	1	-0.118282	0.953292	-0.0572596	NA	-0.0874481	1
ENSG00000088756	ARHGAP28	protein_coding	11910	0.629877	0.116722	2.29918	0.0178621	1.69359	1	1.19354	0.0484715	2.15006	0.0288947	1.74966	0.0386831	0.384429	0.499767	1.12576	0.435249	0.802197	1	0.874075	0.02827	3.57507	0.0280128	2.78145	0.0281414
ENSG00000088766	CRLS1	protein_coding	5370	-0.904986	0.177115	-0.319965	0.870815	-0.583023	1	-0.524771	0.535916	-0.595746	0.684433	-0.559822	1	-0.591374	0.488781	0.218012	NA	-0.13065	1	-1.00505	0.101762	-0.0831382	NA	-0.471673	1
ENSG00000088782	DEFB127	protein_coding	514	NA	NA	NA	NA	0	1	NA	NA	NA	NA	0	1	NA	NA	NA	NA	0	1	NA	NA	NA	NA	0	1
ENSG00000088808	PPP1R13B	protein_coding	9031	2.72385	0.000170547	-0.201181	0.898248	1.9023	1	0.502352	0.748762	0.0445019	0.98766	0.291514	1	1.6667	8.8185e-05	-0.302804	0.813386	0.994783	1	1.76227	0.000120067	-0.551402	0.684932	1.02668	1
ENSG00000088812	ATRN	protein_coding	8753	0.525417	0.111166	1.3958	0.0438419	1.02528	1	0.980142	0.0124493	1.2334	0.0251269	1.11232	0.0187881	0.120131	0.796118	-0.244782	0.823732	-0.0508187	1	0.529363	0.0461298	0.918461	0.311899	0.73699	1
ENSG00000088826	SMOX	protein_coding	2946	1.07865	0.343827	0.899137	NA	0.991686	1	0.705856	0.591592	-0.08958	0.967392	0.362278	1	0.989557	0.415834	0.208069	NA	0.651094	1	0.682685	0.474951	0.19482	NA	0.459277	1
ENSG00000088827	SIGLEC1	protein_coding	7886	NA	NA	NA	NA	0	1	0.651708	NA	-2.07509	NA	-0.145328	1	1.85666	NA	-2.21554	NA	0.939973	1	NA	NA	NA	NA	0	1
ENSG00000088832	FKBP1A	protein_coding	2577	-2.56857	7.14916e-06	-0.825233	0.631026	-1.44819	1	-2.68742	9.17279e-06	-0.998052	0.579746	-1.60842	1	-2.50252	8.35628e-07	1.26051	NA	0.363039	1	-2.77823	2.65338e-10	-2.11901	0.137053	-2.41129	1
ENSG00000088833	NSFL1C	protein_coding	6531	0.296971	0.645217	-0.309327	0.834338	0.0254403	1	0.309871	0.766355	-0.27933	0.853784	0.0451429	1	0.327498	0.631938	0.9567	NA	0.676132	1	0.353217	0.543927	-0.208389	0.907825	0.0995709	1
ENSG00000088836	SLC4A11	protein_coding	4081	1.19989	NA	-2.99605	NA	0.276532	1	-0.948367	0.728608	-1.11278	NA	-1.02823	1	-0.642994	NA	-3.04699	NA	-1.39332	1	-1.25517	NA	-2.95623	0.673761	-1.86829	1
ENSG00000088854	C20orf194	protein_coding	8541	1.21648	0.000119092	0.804764	0.233245	1.02526	1	0.151789	0.813961	-0.415732	0.596121	-0.104243	1	1.16184	5.80326e-06	0.55929	0.465589	0.891798	1	1.38845	9.88797e-10	1.16405	0.159851	1.28061	1
ENSG00000088876	ZNF343	protein_coding	4643	-1.2651	0.172868	-1.08714	NA	-1.17338	1	-1.16313	0.294124	0.385971	NA	-0.189943	1	-1.20416	0.202146	0.201068	NA	-0.336818	1	-1.05194	0.189254	0.462998	NA	-0.104137	1
ENSG00000088881	EBF4	protein_coding	3717	1.12325	0.264109	0.333895	NA	0.7819	1	0.064917	0.971943	-0.357125	NA	-0.130726	1	0.602633	0.334808	-0.620907	0.660707	0.116862	1	0.872056	0.11671	-0.0426011	0.983282	0.486031	1
ENSG00000088882	CPXM1	protein_coding	2391	0.207352	0.730683	-0.45159	0.672143	-0.0848205	1	1.20396	0.0415091	1.42648	0.16822	1.31951	1	0.00172119	0.998414	-0.666284	0.66232	-0.293959	1	0.185392	0.777169	0.540546	0.765732	0.373871	1
ENSG00000088888	MAVS	protein_coding	11771	-1.27478	2.80717e-05	-0.403177	0.66355	-0.774135	1	-1.39919	0.000123583	-0.967851	0.164113	-1.16746	1	-1.26332	0.00159464	-0.110704	0.949035	-0.574842	1	-0.988659	0.00214258	0.803671	0.576796	0.169593	1
ENSG00000088899	LZTS3	protein_coding	5395	1.16861	0.0110177	1.2415	0.238077	1.20551	1	0.877763	0.163306	0.220526	0.867986	0.586252	1	0.643889	0.175415	0.0653502	0.962935	0.383427	1	1.19736	0.000297476	0.348415	0.789941	0.834449	1
ENSG00000088926	F11	protein_coding	3364	-0.872234	NA	-3.15827	NA	-1.60315	1	0.626914	NA	-2.01048	NA	-0.158068	1	NA	NA	NA	NA	0	1	0.0823838	NA	-1.81579	NA	-0.574739	1
ENSG00000088930	XRN2	protein_coding	3437	1.80151	5.00573e-13	1.48848	0.00137724	1.65347	0.00068862	1.83053	1.91438e-07	2.11151	1.27951e-06	1.97785	7.35472e-07	1.96916	2.97867e-14	0.992681	0.145204	1.56201	1	2.12863	2.33838e-22	1.97247	0.0151236	2.05266	0.00756182
ENSG00000088970	KIZ	protein_coding	5207	1.31099	0.182833	0.0433308	NA	0.812133	1	0.688097	0.39527	0.759623	0.572144	0.724303	1	1.36299	0.44369	0.247041	NA	0.910328	1	1.34239	0.115319	1.97306	NA	1.69191	1
ENSG00000088986	DYNLL1	protein_coding	2957	-1.18554	0.0398291	-2.06556	0.0123103	-1.55947	1	-0.910761	0.271854	-1.56639	0.130559	-1.20165	1	-1.26965	0.0601136	-3.03833	0.000749455	-1.89839	1	-0.201793	0.746387	-1.3389	0.284636	-0.6611	1
ENSG00000088992	TESC	protein_coding	1926	0.172436	NA	-2.68985	NA	-0.641671	1	-0.114079	0.973222	-1.02395	NA	-0.498442	1	-0.349544	NA	-3.08032	NA	-1.1471	1	-0.287366	NA	-2.71865	NA	-1.04199	1
ENSG00000089006	SNX5	protein_coding	7953	-0.287625	0.579655	0.162197	0.906322	-0.045253	1	0.201387	0.790258	0.0890521	0.946225	0.146313	1	-0.511801	0.493691	0.498509	NA	0.0800432	1	-0.166762	0.81193	-0.742412	0.653337	-0.426064	1
ENSG00000089009	RPL6	protein_coding	4447	-1.16798	0.00109351	-2.20899	0.000387306	-1.59656	1	-0.371462	0.602205	-0.507203	0.605291	-0.437737	1	-0.195113	0.807824	-2.90334	0.000236664	-0.989699	1	-0.260883	0.642848	-1.03167	0.459458	-0.595403	1
ENSG00000089012	SIRPG	protein_coding	2242	-1.4958	NA	-2.46742	NA	-1.90132	1	-2.17651	0.405941	-1.53969	NA	-1.82325	1	-2.44436	NA	NA	NA	0	1	-2.11208	NA	-3.49112	NA	-2.64274	1
ENSG00000089022	MAPKAPK5	protein_coding	14006	-0.818544	0.0130919	-0.110869	0.91529	-0.421743	1	-0.565196	0.204715	-0.290393	0.74163	-0.421261	1	-0.72372	0.0146888	0.583686	0.593609	0.0732768	1	-0.486662	0.0695921	-0.703915	0.460573	-0.591203	1
ENSG00000089041	P2RX7	protein_coding	5546	1.25988	NA	-1.08895	NA	0.518466	1	-0.00840202	NA	-1.83351	NA	-0.649757	1	1.45133	NA	-1.26744	NA	0.655353	1	1.79437	NA	-1.81511	NA	0.907976	1
ENSG00000089048	ESF1	protein_coding	3216	1.61018	3.97655e-05	1.06068	0.204635	1.36143	1	1.32216	0.0115033	1.01808	0.25992	1.17812	1	2.13325	1.20593e-07	-0.138704	0.909454	1.40473	1	1.96623	1.22283e-08	0.619139	0.681939	1.44451	1
ENSG00000089050	RBBP9	protein_coding	3861	-2.3453	0.000259516	-0.422561	NA	-1.08485	1	-2.45689	0.0176414	-0.744219	NA	-1.36007	1	-2.71769	8.76648e-05	0.63442	NA	-0.230794	1	-2.43676	2.40999e-06	0.615071	NA	-0.220671	1
ENSG00000089053	ANAPC5	protein_coding	12304	1.34662	5.78271e-05	1.73062	0.0161341	1.55136	0.00809596	1.04849	0.013491	1.26762	0.031156	1.16221	0.0223235	0.906913	0.0473928	0.0313541	0.984055	0.53456	1	1.42543	3.11702e-05	0.835234	0.430352	1.16031	1
[truncated: 56,534 more rows]

## Sheet: S1C. gene lists
Supplemental Table S1C. Lists of genes used in this study. Related to Fig. 2 and Fig. S4
dNPC	vNPC	dNeuron	vNeuron	bkg_dNPC	bkg_vNPC	bkg_dNeuron	bkg_vNeuron	Ascano	Darnell	Maurin	Tran
[truncated: 13,847 more rows]

## Sheet: S1D.CLIPper and PureCLIP
Supplemental Table S1D. CLIP targets by CLIPper and PureCLIP
[truncated: 58,349 more rows]
