# Supplementary material for: Identification of FMR1-regulated molecular networks in human neurodevelopment
Source: HighWire-hosted journal article supplement (doi:10.1101/gr.251405.119), 2020-03-01
Supplement: Supplemental_Table_S2.xlsx [file Supplemental_Table_S2.xlsx]

## Sheet: S2A. analysis
Supplemental Table S2A. Analysis of RNA-seq data from NPCs and neurons
DEGs (highlighted in yellow) are defined as padj<0.05
			KO/WT_dNPC			KO/WT_vNPC			KO/WT_dNeuron			KO/WT_vNeuron
					363			287			6			55
stableID	GeneName	biotype	baseMean	log2FC	padj	baseMean	log2FC	padj	baseMean	log2FC	padj	baseMean	log2FC	padj
ENSG00000000003	TSPAN6	protein_coding	1361.57	0.291479	0.285382	1534.08	0.222076	0.388525	201.491	0.338307	0.999918	201.712	0.226939	1
ENSG00000000005	TNMD	protein_coding	0.341463	1.50019	1	0	0	1	2.34752	-0.230281	0.999918	0.762792	2.27971	1
ENSG00000000419	DPM1	protein_coding	364.443	0.559975	0.046153	428.752	0.451569	0.107684	247.029	0.122467	0.999918	294.148	0.25765	1
ENSG00000000457	SCYL3	protein_coding	184.697	-0.001645	1	212.595	0.237226	0.659087	249.697	0.0108367	0.999918	273.977	0.0473584	1
ENSG00000000460	C1orf112	protein_coding	436.22	-0.0279053	0.959766	422.89	0.0555691	0.928861	52.1212	-0.295418	0.999918	73.5344	0.166913	1
ENSG00000000938	FGR	protein_coding	0.188496	1.07965	1	0.336431	0.0635929	1	3.58309	0.675286	0.999918	1.7944	0.865868	1
ENSG00000000971	CFH	protein_coding	0.688819	0.199585	1	0.477787	-0.291729	1	2.753	0.07263	0.999918	1.57823	0.089314	1
ENSG00000001036	FUCA2	protein_coding	250.649	0.0704889	0.904524	244.011	0.0375766	0.965645	69.1956	0.579393	0.999918	51.058	0.239159	1
ENSG00000001084	GCLC	protein_coding	295.727	0.145756	0.754358	265.662	0.214336	0.664193	118.872	0.0112775	0.999918	118.939	-0.114289	1
ENSG00000001167	NFYA	protein_coding	219.253	-0.105047	0.860176	267.09	-0.175762	0.747191	134.045	0.143476	0.999918	187.669	0.186488	1
ENSG00000001460	STPG1	protein_coding	50.4433	0.385977	1	57.0255	-0.0142049	1	35.3845	-0.929119	0.999918	20.5678	-0.353975	1
ENSG00000001461	NIPAL3	protein_coding	83.0487	-0.240655	1	111.485	-0.207555	0.806067	131.204	-0.252442	0.999918	139.519	-0.546081	1
ENSG00000001497	LAS1L	protein_coding	394.89	0.122136	0.774129	371.862	-0.0126592	0.986972	134.89	0.181833	0.999918	126.202	0.305528	1
ENSG00000001561	ENPP4	protein_coding	258.774	0.09536	0.873241	386.138	0.00995308	0.989569	196.628	-0.140408	0.999918	168.363	-0.0396882	1
ENSG00000001617	SEMA3F	protein_coding	56.1102	0.152922	1	33.0651	-0.237822	1	126.625	-0.569182	0.999918	75.8331	-0.290253	1
ENSG00000001626	CFTR	protein_coding	0	0	1	0.506641	0.932308	1	5.09962	1.63533	0.999918	4.24952	0.876813	1
ENSG00000001629	ANKIB1	protein_coding	669.83	-0.0765412	0.853766	1076.16	0.147117	0.67298	928.944	-0.119968	0.999918	971.298	-0.0399996	0.94034
ENSG00000001630	CYP51A1	protein_coding	1041.93	-0.0692948	0.850126	846.143	-0.0610564	0.893931	2317.7	0.0465234	0.999918	1966.33	0.0339362	0.942784
ENSG00000001631	KRIT1	protein_coding	422.984	-0.00117941	0.997614	540.719	-0.071454	0.88966	403.776	-0.141976	0.999918	508.457	0.0918641	1
ENSG00000002016	RAD52	protein_coding	170.584	0.0323767	1	177.028	0.0108115	0.990766	91.7311	0.0703621	0.999918	96.2334	0.0523183	1
ENSG00000002079	MYH16	transcribed_unitary_pseudogene	0.355162	0.258137	1	0.789777	-1.28313	1	6.71661	0.269711	0.999918	2.15608	-0.353137	1
ENSG00000002330	BAD	protein_coding	196.232	0.165196	1	203.007	0.157912	0.817527	144.39	-0.161466	0.999918	83.6864	-0.590411	1
ENSG00000002549	LAP3	protein_coding	393.194	0.280199	0.415601	400.189	0.414789	0.161177	125.255	-0.0144876	0.999918	113.536	0.13374	1
ENSG00000002586	CD99	protein_coding	0	0	1	0	0	1	0	0	1	0	0	1
ENSG00000002586	CD99	protein_coding	0	0	1	0	0	1	0	0	1	0	0	1
ENSG00000002587	HS3ST1	protein_coding	14.9254	-0.945154	1	0.635989	-0.803725	1	28.2057	0.0529505	0.999918	40.6228	-0.513802	1
ENSG00000002726	AOC1	protein_coding	0	0	1	0.161036	0.936026	1	1.83773	1.12201	0.999918	1.00891	-0.503996	1
ENSG00000002745	WNT16	protein_coding	0	0	1	0.161036	0.936026	1	1.30439	2.57183	0.999918	1.0051	0.796329	1
ENSG00000002746	HECW1	protein_coding	127.16	-0.789231	1	38.6032	-0.418249	1	1241.84	-0.185817	0.999918	1010.44	-0.126132	0.707138
ENSG00000002822	MAD1L1	protein_coding	287.639	0.0930961	0.860176	309.88	0.179079	0.719663	268.142	-0.0122234	0.999918	242.958	-0.22627	1
ENSG00000002834	LASP1	protein_coding	963.855	-0.187423	0.505759	905.2	-0.222145	0.429107	2010.65	0.000280645	0.999918	1930.66	-0.216065	0.238423
ENSG00000002919	SNX11	protein_coding	123.958	0.0114544	1	142.279	0.0835258	0.923681	65.7697	0.0242426	0.999918	56.2966	-0.0431678	1
ENSG00000002933	TMEM176A	protein_coding	2.09381	1.00825	1	1.00131	0.0464432	1	0.580758	0.970573	0.999918	0.803662	0.964029	1
ENSG00000003056	M6PR	protein_coding	642.658	0.127877	0.740346	972.276	0.211388	0.492768	398.026	0.143982	0.999918	455.83	-0.0167496	1
ENSG00000003096	KLHL13	protein_coding	149.534	0.431159	1	328.591	-0.00175586	0.999499	260.773	-0.797135	0.999918	197.065	-0.0496244	1
ENSG00000003137	CYP26B1	protein_coding	11.3024	0.293152	1	3.26864	-0.193165	1	10.1476	-0.293007	0.999918	5.85787	-0.284308	1
ENSG00000003147	ICA1	protein_coding	66.9944	0.213373	1	117.781	0.300316	0.699433	100.496	0.152001	0.999918	85.4329	0.00778443	1
ENSG00000003249	DBNDD1	protein_coding	75.606	-1.02401	1	81.6085	-0.606041	1	299.015	-0.338966	0.999918	292.627	-0.807169	1
ENSG00000003393	ALS2	protein_coding	757.164	0.334743	0.352342	804.038	0.103649	0.818199	733.902	-0.0343907	0.999918	760.268	-0.0452961	0.94034
ENSG00000003400	CASP10	protein_coding	0.688819	0.199585	1	1.35139	2.14351	1	4.75653	2.33972	0.999918	3.86587	0.116862	1
ENSG00000003402	CFLAR	protein_coding	40.6943	-0.203047	1	64.1521	-0.618128	1	45.0795	0.442483	0.999918	76.9757	-0.1722	1
ENSG00000003436	TFPI	protein_coding	29.5273	0.260807	1	19.28	0.635234	1	9.33051	1.11293	0.999918	3.71221	1.29323	1
ENSG00000003509	NDUFAF7	protein_coding	163.347	-0.000879704	1	192.251	-0.0209244	0.98187	168.464	-0.142789	0.999918	182.313	0.140167	1
ENSG00000003756	RBM5	protein_coding	1971.21	-0.214899	0.434328	2200.21	-0.0619602	0.88181	2139.81	-0.0609916	0.999918	2376.8	0.0847448	0.743468
ENSG00000003987	MTMR7	protein_coding	185.447	-0.372274	1	186.107	-0.338856	0.476135	626.745	-0.038306	0.999918	604.546	0.182717	1
ENSG00000003989	SLC7A2	protein_coding	46.0832	1.31739	1	182.236	0.00243036	0.999467	7.08554	1.90074	0.999918	16.7168	0.41671	1
ENSG00000004059	ARF5	protein_coding	805.176	0.33159	0.225755	761.86	0.208213	0.501654	1116.99	-0.10198	0.999918	941.281	-0.0262423	0.968816
ENSG00000004139	SARM1	protein_coding	356.497	-0.423733	0.184188	279.69	-0.36898	0.393809	532.62	-0.166202	0.999918	575.209	-0.321661	1
ENSG00000004142	POLDIP2	protein_coding	420.191	0.0911005	0.840955	439.567	0.0548613	0.924065	464.287	-0.170346	0.999918	442.103	-0.0990871	1
ENSG00000004399	PLXND1	protein_coding	39.2448	0.324216	1	25.3229	0.235327	1	6.61171	0.198449	0.999918	5.96364	0.704934	1
ENSG00000004455	AK2	protein_coding	716.962	0.407977	0.0920724	763.131	0.0835085	0.856626	286.558	0.0732405	0.999918	321.658	-0.0893506	1
ENSG00000004468	CD38	protein_coding	0.812671	0.57911	1	1.16696	3.54953	1	4.93396	2.88407	0.999918	3.40436	1.57966	1
ENSG00000004478	FKBP4	protein_coding	1575.75	0.109818	0.774129	1506.27	0.0394358	0.938919	599.561	0.0430853	0.999918	492.929	-0.282727	1
ENSG00000004487	KDM1A	protein_coding	2918.07	0.00398758	0.991491	3201.86	-0.0355081	0.930839	3557.34	-0.0856926	0.999918	3794.57	-0.0924878	0.666659
ENSG00000004534	RBM6	protein_coding	846.229	-0.11329	0.767601	887.362	-0.0472093	0.926667	1018.56	-0.209981	0.999918	1144.88	-0.115409	0.699835
ENSG00000004660	CAMKK1	protein_coding	45.6389	-0.0828139	1	41.7723	-0.331761	1	41.569	-0.149692	0.999918	40.6138	-0.643929	1
ENSG00000004700	RECQL	protein_coding	516.317	0.0414142	0.9301	596.783	0.115187	0.814521	143.813	0.160908	0.999918	153.55	0.0818529	1
ENSG00000004766	VPS50	protein_coding	390.49	-0.102832	0.823345	530.04	0.153767	0.722284	479.621	-0.0907694	0.999918	504.273	0.20298	1
ENSG00000004776	HSPB6	protein_coding	0.942012	0.2193	1	1.43305	-1.54071	1	0.842312	-2.19455	0.999918	2.05872	2.50133	1
ENSG00000004777	ARHGAP33	protein_coding	164.771	-0.760388	1	131.514	-0.697758	0.101922	364.843	-0.181505	0.999918	259.702	-0.342305	1
ENSG00000004779	NDUFAB1	protein_coding	479.702	0.437918	0.138355	485.488	0.484552	0.0638605	170.861	0.160446	0.999918	179.038	-0.025512	1
ENSG00000004799	PDK4	protein_coding	3.77897	-0.908585	1	2.93438	-0.990808	1	3.66147	0.157839	0.999918	3.83105	-0.00480979	1
ENSG00000004809	SLC22A16	protein_coding	0.170731	1.09311	1	0.161036	0.936026	1	1.92418	-0.510435	0.999918	0.972735	2.37088	1
ENSG00000004838	ZMYND10	protein_coding	17.5399	-0.133588	1	16.6468	0.27988	1	15.1987	0.424545	0.999918	15.4023	-0.381645	1
ENSG00000004846	ABCB5	protein_coding	0.188496	1.07965	1	0.161036	0.936026	1	5.67174	0.675369	0.999918	1.8849	1.3285	1
ENSG00000004848	ARX	protein_coding	137.383	-0.501142	1	124.64	-0.882142	0.0365694	337.201	-0.417001	0.999918	388.49	-0.738284	1
ENSG00000004864	SLC25A13	protein_coding	855.312	0.21328	0.500526	1021.03	0.136563	0.722284	377.552	0.231046	0.999918	437.32	0.0623981	1
ENSG00000004866	ST7	protein_coding	245.611	-0.309967	0.465504	295.064	-0.0945286	0.889362	885.981	-0.193251	0.999918	912.524	-0.0432924	0.938887
ENSG00000004897	CDC27	protein_coding	1161.78	-0.076981	0.837011	1331.78	0.0120867	0.986436	1789.75	-0.0735592	0.999918	1866.41	0.0725743	0.830371
ENSG00000004939	SLC4A1	protein_coding	0.510478	-0.65389	1	0.176303	0.95217	1	4.84957	0.619561	0.999918	3.0916	1.20768	1
ENSG00000004948	CALCR	protein_coding	11.8582	1.79021	1	5.53374	0.983444	1	16.1937	-0.41376	0.999918	35.1606	0.908093	1
ENSG00000004961	HCCS	protein_coding	139.636	0.264586	1	148.124	0.206636	0.764118	108.834	-0.391998	0.999918	117.181	-0.0162919	1
ENSG00000004975	DVL2	protein_coding	556.982	0.0664505	0.879894	568.657	-0.0154471	0.981179	190.832	0.0904414	0.999918	187.489	-0.282307	1
ENSG00000005001	PRSS22	protein_coding	0	0	1	0	0	1	0.700004	-1.33514	0.999918	1.63485	1.56103	1
ENSG00000005007	UPF1	protein_coding	380.59	-0.0234668	0.968458	363.861	-0.0326555	0.967582	326.204	0.0104419	0.999918	322.529	-0.25512	1
ENSG00000005020	SKAP2	protein_coding	17.7701	0.504219	1	33.2675	0.252465	1	58.2767	0.268733	0.999918	65.4976	0.948781	1
ENSG00000005022	SLC25A5	protein_coding	876.137	0.257325	0.389661	929.051	0.100575	0.80214	280.776	0.117528	0.999918	285.712	-0.115011	1
ENSG00000005059	MCUB	protein_coding	283.337	0.490412	0.150548	220.371	0.246528	0.667488	36.6045	0.211742	0.999918	32.3898	-0.11075	1
ENSG00000005073	HOXA11	protein_coding	0.188496	1.07965	1	0.160128	-0.818939	1	1.31435	0.766898	0.999918	1.06402	1.36694	1
ENSG00000005075	POLR2J	protein_coding	191.333	0.361312	1	198.139	0.366538	0.419922	62.2797	-0.0224355	0.999918	59.5752	-0.255798	1
ENSG00000005100	DHX33	protein_coding	236.936	0.192295	0.689028	213.028	0.40842	0.321119	111.244	0.064313	0.999918	110.738	0.291222	1
ENSG00000005102	MEOX1	protein_coding	0.188496	1.07965	1	0.970665	-0.116795	1	5.0544	1.03673	0.999918	3.00475	2.80854	1
ENSG00000005108	THSD7A	protein_coding	323.999	-0.906841	0.311258	351.652	-0.607985	0.0382347	1437.91	-0.0995403	0.999918	1366.18	0.0991392	0.736888
ENSG00000005156	LIG3	protein_coding	1195.87	-0.0700492	0.84434	1106.46	-0.0983349	0.806067	600.986	-0.0342048	0.999918	629.181	-0.107576	1
ENSG00000005175	RPAP3	protein_coding	558.477	0.115289	0.774129	685.432	0.248255	0.433501	641.332	0.0443813	0.999918	689.887	0.0917136	0.847812
ENSG00000005187	ACSM3	protein_coding	3.8375	-0.247801	1	3.11804	-1.04135	1	4.46749	0.678543	0.999918	6.15617	0.569669	1
ENSG00000005189	REXO5	protein_coding	130.417	0.355256	1	125.05	0.0370451	0.973205	30.0997	0.747627	0.999918	22.8576	-0.188807	1
ENSG00000005194	CIAPIN1	protein_coding	511.2	0.150296	0.681544	526.043	-0.0240302	0.970634	266.988	-0.167339	0.999918	294.322	-0.220582	1
ENSG00000005206	SPPL2B	protein_coding	126.285	-0.428663	1	126.45	-0.443994	0.40764	85.1252	-0.0302567	0.999918	68.0555	-0.638258	1
ENSG00000005238	FAM214B	protein_coding	362.53	-0.27628	0.47761	383.301	-0.166197	0.723422	356.893	-0.0534348	0.999918	412.702	0.0175916	1
ENSG00000005243	COPZ2	protein_coding	5.94671	0.508845	1	4.7721	-2.69707	1	2.0243	1.16415	0.999918	2.25656	0.466122	1
ENSG00000005249	PRKAR2B	protein_coding	628.931	0.0296057	0.948658	754.637	-0.0433961	0.9386	2467.8	-0.0459134	0.999918	2243.41	0.0545608	0.881972
ENSG00000005302	MSL3	protein_coding	232.251	-0.156022	0.758227	267.45	0.0192568	0.98196	264.804	-0.0837565	0.999918	265.727	0.0567644	1
ENSG00000005339	CREBBP	protein_coding	418.317	-0.0648005	0.904524	426.502	0.0891256	0.886724	913.843	-0.0786459	0.999918	964.043	-0.140404	0.673818
ENSG00000005379	TSPOAP1	protein_coding	304.621	-0.623265	0.0430765	308.12	-0.625155	0.0316105	879.383	-0.278644	0.999918	598.697	-0.431139	1
ENSG00000005381	MPO	protein_coding	0.137551	-0.670093	1	0.330338	0.0463128	1	2.46581	-0.346125	0.999918	2.86938	1.22449	1
ENSG00000005421	PON1	protein_coding	3.80572	-0.561291	1	0.491127	1.07447	1	3.24995	0.206882	0.999918	2.07593	1.34285	1
ENSG00000005436	GCFC2	protein_coding	93.4558	0.10711	1	101.678	0.133821	0.889362	26.7947	-0.13346	0.999918	32.7917	-0.0705153	1
ENSG00000005448	WDR54	protein_coding	371.953	0.0499281	0.9301	365.745	-0.161303	0.731813	106.827	-0.0471053	0.999918	104.057	-0.245809	1
ENSG00000005469	CROT	protein_coding	560.69	0.431277	0.0990446	338.165	0.22149	0.657793	64.498	0.492326	0.999918	50.3721	0.545829	1
ENSG00000005471	ABCB4	protein_coding	7.07299	0.369596	1	11.3715	0.376809	1	4.81915	0.116189	0.999918	3.29721	1.35237	1
ENSG00000005483	KMT2E	protein_coding	1526.54	-0.269146	0.23961	1504.29	-0.155137	0.603388	3673.63	-0.0161441	0.999918	3700.83	0.126159	0.50815
ENSG00000005486	RHBDD2	protein_coding	307.203	-0.405155	0.220153	375.27	-0.335688	0.315197	745.959	-0.208258	0.999918	625.757	-0.458649	1
ENSG00000005513	SOX8	protein_coding	39.4066	-0.25738	1	107.487	-0.379458	0.568198	7.21491	-0.45712	0.999918	6.86327	0.177483	1
ENSG00000005700	IBTK	protein_coding	1054.81	-0.00858565	0.985282	1186.18	-0.0463969	0.924022	740.032	-0.205627	0.999918	789.562	0.189609	0.54535
ENSG00000005801	ZNF195	protein_coding	583.612	0.221502	0.477264	680.497	0.212151	0.567215	906.846	-0.0337322	0.999918	1097.2	0.087195	0.825859
ENSG00000005810	MYCBP2	protein_coding	1489.76	-0.392035	0.0580979	1617.89	-0.216921	0.435407	2561.73	-0.180772	0.999918	1873.19	-0.0347434	0.940086
ENSG00000005812	FBXL3	protein_coding	399.194	0.0547597	0.909916	441.383	0.256575	0.467907	532.53	0.142888	0.999918	618.073	0.296143	1
ENSG00000005844	ITGAL	protein_coding	0.137551	-0.670093	1	1.00054	0.498348	1	3.6802	-0.305195	0.999918	3.28837	0.322166	1
ENSG00000005882	PDK2	protein_coding	167.139	-0.266125	1	162.103	-0.250416	0.678596	396.408	0.139268	0.999918	365.542	-0.203718	1
ENSG00000005884	ITGA3	protein_coding	78.8911	-0.00897458	1	53.298	0.259974	1	277.737	-0.148255	0.999918	206.814	0.0412822	1
ENSG00000005889	ZFX	protein_coding	425.744	-0.196925	0.584805	423.082	0.0853087	0.87775	466.854	-0.0726012	0.999918	468.483	0.037053	1
ENSG00000005893	LAMP2	protein_coding	589.768	-0.08258	0.84434	654.393	0.0697537	0.88966	357.079	0.139286	0.999918	401.461	0.170669	1
ENSG00000005961	ITGA2B	protein_coding	16.5454	-0.865297	1	22.4347	-0.127257	1	6.48868	0.0246583	0.999918	5.77535	-1.00865	1
ENSG00000005981	ASB4	protein_coding	0.529959	2.24837	1	2.11879	1.04727	1	9.79856	-0.297518	0.999918	5.55213	0.530642	1
ENSG00000006007	GDE1	protein_coding	606.75	0.0930688	0.824877	654.955	0.033539	0.956212	981.119	0.0256808	0.999918	1054.56	0.124356	0.684803
ENSG00000006015	C19orf60	protein_coding	156.388	0.337241	1	137.222	0.304162	0.628074	52.0808	-0.432971	0.999918	53.0261	-0.298569	1
ENSG00000006016	CRLF1	protein_coding	2.3224	1.80054	1	1.97489	-0.295904	1	4.96242	0.723231	0.999918	2.49108	-0.354307	1
ENSG00000006025	OSBPL7	protein_coding	61.9546	-0.442631	1	59.0827	-0.137124	1	52.0451	0.0464106	0.999918	35.7273	-0.176904	1
ENSG00000006042	TMEM98	protein_coding	962.403	0.17348	0.555287	1326.37	0.262404	0.31	212.589	0.358638	0.999918	154.908	-0.0245743	1
ENSG00000006047	YBX2	protein_coding	10.1106	-0.171656	1	11.0428	0.577697	1	51.4157	-0.647363	0.999918	18.6223	0.0195389	1
ENSG00000006059	KRT33A	protein_coding	0	0	1	0	0	1	0.954499	0.828485	0.999918	0.266242	-1.06605	1
ENSG00000006062	MAP3K14	protein_coding	48.3707	-0.146949	1	58.6258	0.148964	1	34.6952	0.0285204	0.999918	43.8639	0.251292	1
ENSG00000006071	ABCC8	protein_coding	34.6051	-0.60095	1	19.0795	-0.659513	1	23.8951	0.051424	0.999918	26.6404	0.062815	1
ENSG00000006116	CACNG3	protein_coding	3.63722	-0.083861	1	2.85073	0.700781	1	9.61566	-2.15844	0.999918	10.5326	0.345952	1
ENSG00000006118	TMEM132A	protein_coding	480.735	-0.269113	0.387164	610.822	-0.30095	0.304906	742.977	-0.223163	0.999918	585.563	-0.579254	1
ENSG00000006125	AP2B1	protein_coding	2319.26	-0.110317	0.703039	2408.27	-0.11252	0.722284	3278.85	0.0998389	0.999918	3130.04	0.133501	0.547817
ENSG00000006128	TAC1	protein_coding	4.25141	-1.54178	1	13.3977	-1.06632	1	508.026	0.0996843	0.999918	269.459	0.330902	1
ENSG00000006194	ZNF263	protein_coding	367.951	-0.0699491	0.886518	412.86	0.100081	0.856626	258.642	-0.147712	0.999918	271.543	-0.152799	1
ENSG00000006210	CX3CL1	protein_coding	42.4015	-0.840876	1	48.5515	-1.01803	1	61.1978	0.189954	0.999918	38.6609	-0.746069	1
ENSG00000006282	SPATA20	protein_coding	153.731	-0.370513	1	161.685	-0.588185	0.143019	97.543	-0.00139456	0.999918	83.3442	-0.415462	1
ENSG00000006283	CACNA1G	protein_coding	20.8247	-1.01452	1	24.5251	-0.776067	1	68.4262	-1.08812	0.999918	33.7291	0.0815477	1
ENSG00000006327	TNFRSF12A	protein_coding	41.6403	0.727452	1	35.4532	1.25035	1	17.1769	1.23783	0.999918	7.85504	0.334281	1
ENSG00000006377	DLX6	protein_coding	11.6841	-2.46203	1	21.8803	-0.857769	1	705.224	-0.500118	0.999918	554.031	-0.329702	1
ENSG00000006432	MAP3K9	protein_coding	287.474	-0.489765	0.181512	210.685	-0.477678	0.222014	1294.26	-0.193271	0.999918	1048.83	-0.0950498	0.789203
ENSG00000006451	RALA	protein_coding	458.196	0.146466	0.706719	593.487	0.312869	0.342396	280.739	0.114546	0.999918	317.185	0.13871	1
ENSG00000006453	BAIAP2L1	protein_coding	93.4793	0.345953	1	45.254	-0.174816	1	15.3649	0.51002	0.999918	4.66568	-0.299215	1
ENSG00000006459	KDM7A	protein_coding	415.878	-0.117683	0.790636	469.045	-0.16856	0.701596	500.961	-0.139528	0.999918	633.278	0.169149	1
ENSG00000006468	ETV1	protein_coding	921.865	-0.408671	0.125217	522.898	0.03447	0.965645	525.692	0.160266	0.999918	179.496	0.393352	1
ENSG00000006530	AGK	protein_coding	453.041	0.13352	0.766076	481.188	0.293946	0.375131	461.903	-0.00587708	0.999918	347.72	-0.0655798	1
ENSG00000006534	ALDH3B1	protein_coding	3.48045	0.86	1	0.467706	-1.97549	1	1.00645	-0.850978	0.999918	2.23156	1.20549	1
ENSG00000006555	TTC22	protein_coding	0.734635	-2.22296	1	1.33942	-0.883757	1	2.05211	1.44826	0.999918	4.38166	0.182212	1
ENSG00000006576	PHTF2	protein_coding	399.134	0.00871479	0.988151	409.879	0.0730069	0.899323	569.565	0.0475313	0.999918	575.038	0.169164	1
ENSG00000006606	CCL26	protein_coding	0	0	1	0	0	1	1.24504	1.64663	0.999918	0.135151	-0.226934	1
ENSG00000006607	FARP2	protein_coding	115.115	0.053587	1	104.719	0.0420429	0.973205	114.918	-0.011583	0.999918	104.668	-0.182376	1
ENSG00000006611	USH1C	protein_coding	1.20468	3.17151	1	0	0	1	2.49773	0.614884	0.999918	2.0175	1.5282	1
ENSG00000006625	GGCT	protein_coding	247.498	0.528549	0.173925	216.851	0.158783	0.815118	50.4493	-0.135854	0.999918	41.6346	0.0451949	1
ENSG00000006634	DBF4	protein_coding	582.543	0.181862	0.587486	593.908	0.179537	0.639883	129.618	0.39418	0.999918	185.87	0.24999	1
ENSG00000006638	TBXA2R	protein_coding	0.31306	0.209944	1	0	0	1	0.709963	-1.88097	0.999918	1.36721	1.68005	1
ENSG00000006652	IFRD1	protein_coding	628.812	0.334246	0.235883	688.932	0.196293	0.597124	671.929	-0.191596	0.999918	735.77	-0.193389	0.549681
ENSG00000006659	LGALS14	protein_coding	0	0	1	0	0	1	1.59233	0.948515	0.999918	0.827127	0.0492527	1
ENSG00000006695	COX10	protein_coding	136.841	0.00938693	1	152.601	0.00092596	0.999966	194.084	0.0726681	0.999918	201.353	0.0312714	1
ENSG00000006704	GTF2IRD1	protein_coding	330.232	0.0558265	0.917863	342.46	0.000424921	0.999966	288.334	-0.202651	0.999918	305.277	-0.271716	1
ENSG00000006712	PAF1	protein_coding	308.69	-0.124093	0.790694	324.779	-0.0185758	0.981179	570.326	-0.0728065	0.999918	619.281	-0.168398	1
ENSG00000006715	VPS41	protein_coding	1082.18	-0.0591747	0.877742	1285.72	0.00572351	0.991964	1039.86	-0.011088	0.999918	1078.25	0.106527	0.752346
ENSG00000006740	ARHGAP44	protein_coding	57.3424	0.134557	1	48.5461	-0.188374	1	83.7331	0.0157945	0.999918	69.6852	-0.334223	1
ENSG00000006744	ELAC2	protein_coding	426.095	0.0309898	0.951785	479.696	0.0414402	0.945069	200.576	-0.0325987	0.999918	214.218	-0.0189766	1
ENSG00000006747	SCIN	protein_coding	0.496779	1.20356	1	0.170209	0.952709	1	6.57564	0.941001	0.999918	3.10488	0.683479	1
ENSG00000006756	ARSD	protein_coding	99.652	-0.743098	1	99.0761	-0.475658	0.47789	69.4445	0.457624	0.999918	92.1745	0.0544443	1
ENSG00000006757	PNPLA4	protein_coding	95.0556	0.163835	1	100.579	0.132554	0.88966	49.6298	0.0002441	0.999918	58.3309	0.329905	1
ENSG00000006788	MYH13	protein_coding	0	0	1	0.314825	0.0550232	1	5.24343	-0.268054	0.999918	4.76663	2.36259	1
ENSG00000006831	ADIPOR2	protein_coding	549.391	-0.126637	0.740407	598.628	0.0185066	0.979086	158.167	-0.0248357	0.999918	172.345	-0.0911292	1
ENSG00000006837	CDKL3	protein_coding	19.1652	0.171084	1	26.0179	0.186533	1	25.6515	0.606538	0.999918	28.9514	0.64535	1
ENSG00000007001	UPP2	protein_coding	0.796852	1.05424	1	0.326523	-1.61825	1	3.55025	-2.78567	0.999918	2.16379	0.655795	1
ENSG00000007038	PRSS21	protein_coding	0	0	1	0	0	1	0.715088	-0.785627	0.999918	0.705207	1.18485	1
ENSG00000007047	MARK4	protein_coding	210.932	-0.230081	0.621785	206.122	-0.0633801	0.940254	423.97	-0.25858	0.999918	340.405	-0.320026	1
ENSG00000007062	PROM1	protein_coding	681.883	0.514187	0.0374428	106.483	0.386809	0.674049	44.8914	2.01489	0.999918	58.712	0.85835	1
ENSG00000007080	CCDC124	protein_coding	131.566	0.346159	1	124.781	0.139254	0.868426	112.979	-0.224067	0.999918	97.2239	-0.326486	1
ENSG00000007129	CEACAM21	protein_coding	1.40392	0.805064	1	0.677757	2.86235	1	4.26921	-0.171226	0.999918	1.03309	0.427502	1
ENSG00000007168	PAFAH1B1	protein_coding	2508.88	-0.188107	0.416584	2722.78	-0.104541	0.782236	3898.52	-0.00935923	0.999918	3791.82	-0.00570373	0.987888
ENSG00000007171	NOS2	protein_coding	463.918	1.46384	0.0333382	359.911	0.582763	0.0716348	17.9139	0.500579	0.999918	17.5787	1.10337	1
ENSG00000007174	DNAH9	protein_coding	37.3313	0.321259	1	13.2083	-0.0314196	1	67.116	0.819638	0.999918	30.291	0.177263	1
ENSG00000007202	KIAA0100	protein_coding	1849.08	-0.173531	0.519731	1804.02	-0.220507	0.36009	1153.94	-0.157101	0.999918	1109.83	-0.18886	0.460548
ENSG00000007216	SLC13A2	protein_coding	0.329591	-1.47671	1	0.160128	-0.818939	1	2.08676	1.79123	0.999918	1.00979	3.63384	1
ENSG00000007237	GAS7	protein_coding	166.287	-0.171514	1	92.1774	-0.178511	1	407.335	-0.455138	0.999918	250.755	-0.474764	1
ENSG00000007255	TRAPPC6A	protein_coding	125.814	0.441919	1	135.651	0.108161	0.899464	11.9079	0.734006	0.999918	13.4667	-0.262036	1
ENSG00000007264	MATK	protein_coding	4.74176	0.101048	1	12.1218	0.0973404	1	9.09699	0.284075	0.999918	8.60075	0.610783	1
ENSG00000007306	CEACAM7	protein_coding	0	0	1	0.313917	-1.60772	1	1.32785	-2.06426	0.999918	0.968676	1.30912	1
ENSG00000007312	CD79B	protein_coding	0.320669	0.167834	1	0.49656	-0.291951	1	0.23232	1.27412	0.999918	0	0	1
ENSG00000007314	SCN4A	protein_coding	4.3593	-0.97634	1	13.421	-1.07626	1	5.15119	-0.913035	0.999918	7.87228	0.909581	1
ENSG00000007341	ST7L	protein_coding	216.195	-0.0919565	0.877947	248.256	0.0546102	0.942161	229.091	-0.0155974	0.999918	258.628	0.0903335	1
ENSG00000007350	TKTL1	protein_coding	65.5011	0.144574	1	0.638823	0.582437	1	2.05109	1.823	0.999918	3.53561	1.50974	1
ENSG00000007372	PAX6	protein_coding	2151.16	-0.0495922	0.910622	44.7763	1.73487	1	2561.29	0.150017	0.999918	108.731	1.77745	1
ENSG00000007376	RPUSD1	protein_coding	108.37	0.122656	1	120.434	0.127085	0.883892	78.4873	-0.129435	0.999918	58.633	-0.46878	1
ENSG00000007384	RHBDF1	protein_coding	80.9609	0.0698064	1	51.2299	0.330655	1	10.5131	1.2349	0.999918	13.2067	-0.720204	1
ENSG00000007392	LUC7L	protein_coding	616.854	-0.061439	0.884651	656.742	-0.158009	0.697229	424.182	-0.17744	0.999918	480.524	-0.0558558	1
ENSG00000007402	CACNA2D2	protein_coding	103.576	-0.428211	1	116.474	-0.146503	0.870849	265.805	-0.0175559	0.999918	276.918	-0.404707	1
ENSG00000007516	BAIAP3	protein_coding	61.5933	-0.946118	1	77.0527	-0.801882	1	337.042	-0.384855	0.999918	250.436	-0.616122	1
ENSG00000007520	TSR3	protein_coding	244.798	0.237524	0.578421	218.996	0.208379	0.704427	247.257	-0.134147	0.999918	247.854	-0.0266931	1
ENSG00000007541	PIGQ	protein_coding	154.964	-0.163366	1	164.517	-0.126659	0.867754	101.897	-0.180974	0.999918	89.3629	-0.566512	1
ENSG00000007545	CRAMP1	protein_coding	119.081	-0.364728	1	110.4	-0.208956	0.80214	74.7886	-0.343877	0.999918	83.2184	-0.404728	1
ENSG00000007866	TEAD3	protein_coding	125.34	-0.0250014	1	100.491	0.159483	0.863444	21.2199	-0.306418	0.999918	18.428	1.40318	1
ENSG00000007908	SELE	protein_coding	0.137551	-0.670093	1	0.307578	-1.22246	1	2.34545	1.51169	0.999918	2.09207	1.76756	1
ENSG00000007923	DNAJC11	protein_coding	320.34	-0.132321	0.77327	329.756	0.0506608	0.940639	376.792	0.0174732	0.999918	434.183	-0.0707635	1
ENSG00000007933	FMO3	protein_coding	0.137551	-0.670093	1	0.340419	1.3613	1	0.882583	-0.472326	0.999918	0.165014	1.50479	1
ENSG00000007944	MYLIP	protein_coding	57.4377	-0.150281	1	95.5054	0.0736899	0.950289	63.94	-0.378712	0.999918	52.8237	-0.282294	1
ENSG00000007952	NOX1	protein_coding	0.188496	1.07965	1	0.170209	0.952709	1	1.15305	-0.464491	0.999918	0.737346	2.70685	1
ENSG00000007968	E2F2	protein_coding	189.014	-0.307133	1	171.715	-0.274741	0.649233	18.0576	1.94577	0.999918	13.1969	1.84683	1
ENSG00000008018	PSMB1	protein_coding	1196.84	0.387429	0.087186	1294.48	0.386754	0.0796505	538.882	0.170002	0.999918	685.864	0.0759255	0.881972
ENSG00000008056	SYN1	protein_coding	16.9195	-0.645987	1	19.8799	-1.13213	1	557.603	0.0815778	0.999918	506.309	-0.237023	1
ENSG00000008083	JARID2	protein_coding	995.404	-0.180431	0.554004	1579.44	-0.0561183	0.89726	789.627	-0.0905245	0.999918	923.107	-0.0446352	0.954805
ENSG00000008086	CDKL5	protein_coding	255.085	-0.175479	0.704974	235.69	-0.360389	0.396541	617.073	-0.252299	0.999918	522.218	-0.0357908	1
ENSG00000008118	CAMK1G	protein_coding	74.9158	0.00399836	1	55.9684	-0.529422	1	122.796	-0.113425	0.999918	129.45	-0.154841	1
ENSG00000008128	CDK11A	protein_coding	1.52717	0.339982	1	2.16754	0.264925	1	0.93421	2.37517	0.999918	0.77679	-0.244684	1
ENSG00000008130	NADK	protein_coding	233.515	0.0215482	0.97621	251.396	0.0028885	0.998719	159.743	-0.268476	0.999918	143.607	-0.230298	1
ENSG00000008196	TFAP2B	protein_coding	5.62533	-0.085614	1	0.980686	-0.508978	1	29.443	0.966303	0.999918	7.426	1.10484	1
ENSG00000008197	TFAP2D	protein_coding	0.326047	0.203465	1	0.172734	-0.835596	1	0.882093	-1.13922	0.999918	1.22371	2.92378	1
ENSG00000008226	DLEC1	protein_coding	9.34868	-0.0324907	1	34.4864	0.103272	1	7.33689	0.849538	0.999918	5.86376	0.297111	1
ENSG00000008256	CYTH3	protein_coding	183.389	-0.105425	1	203.734	0.0189186	0.986363	257.327	-0.101625	0.999918	294.897	-0.0398487	1
ENSG00000008277	ADAM22	protein_coding	519.603	-0.117388	0.788352	502.085	-0.104936	0.830169	908.674	-0.0601345	0.999918	793.296	0.0725747	0.882902
ENSG00000008282	SYPL1	protein_coding	246.55	0.448369	0.209793	368.387	0.199613	0.651619	39.242	0.599722	0.999918	41.3704	0.340604	1
ENSG00000008283	CYB561	protein_coding	85.7058	-0.0242306	1	56.7889	-0.129013	1	136.816	-0.0480589	0.999918	82.6511	-0.0738723	1
ENSG00000008294	SPAG9	protein_coding	3496.09	-0.398105	0.0480334	4488.87	-0.182913	0.470053	3521.13	-0.122556	0.999918	4379.22	-0.0525118	0.859437
ENSG00000008300	CELSR3	protein_coding	427.22	-0.611225	0.10757	389.063	-0.372853	0.285951	1170.79	-0.10512	0.999918	1175.97	-0.273422	0.177353
ENSG00000008311	AASS	protein_coding	1139.8	-0.13628	0.681544	1242.42	-0.0797065	0.846462	111.792	0.0835377	0.999918	192.892	0.301534	1
ENSG00000008323	PLEKHG6	protein_coding	0.479014	0.319163	1	0.323998	0.0638332	1	6.61893	0.897508	0.999918	2.66981	1.77584	1
ENSG00000008324	SS18L2	protein_coding	137.326	0.397884	1	179.598	0.380229	0.41588	39.902	-0.514732	0.999918	49.6969	-0.0162297	1
ENSG00000008382	MPND	protein_coding	141.194	0.0439328	1	133.912	0.142751	0.86114	65.7606	-0.207024	0.999918	60.6313	-0.299711	1
ENSG00000008394	MGST1	protein_coding	109.267	0.756963	1	1078.02	0.461983	0.0505953	8.39325	1.05388	0.999918	36.0617	1.0534	1
ENSG00000008405	CRY1	protein_coding	218.221	0.144102	0.790636	296.423	0.141552	0.814521	121.008	-0.376617	0.999918	172.287	-0.0785645	1
ENSG00000008438	PGLYRP1	protein_coding	0	0	1	0	0	1	0.37176	2.08684	0.999918	0.718931	0.697433	1
ENSG00000008441	NFIX	protein_coding	0.985752	-1.1002	1	0.4822	0.286478	1	5.53191	0.815735	0.999918	4.03793	0.644882	1
ENSG00000008513	ST3GAL1	protein_coding	83.2512	-0.00204807	1	94.565	-0.243584	0.768153	134.941	0.183309	0.999918	128.941	0.348386	1
ENSG00000008516	MMP25	protein_coding	2.38318	-2.05183	1	0.682806	0.599668	1	2.64123	2.67205	0.999918	1.47034	2.06484	1
ENSG00000008517	IL32	protein_coding	2.52021	1.7912	1	2.95209	1.23523	1	2.63031	0.157998	0.999918	1.64866	4.33034	1
ENSG00000008710	PKD1	protein_coding	362.348	-0.629818	0.0380309	276.794	-0.483166	0.243092	403.445	-0.159491	0.999918	375.539	-0.40964	1
ENSG00000008735	MAPK8IP2	protein_coding	246.474	-0.464913	0.28273	200.234	-0.591395	0.0893479	431.863	-0.0310572	0.999918	417.236	-0.226542	1
ENSG00000008838	MED24	protein_coding	401.757	-0.344403	0.259646	348.96	-0.360098	0.322503	444.087	0.0182996	0.999918	422.625	-0.111144	1
ENSG00000008853	RHOBTB2	protein_coding	319.854	-0.636541	0.0530057	212.524	-0.618512	0.0999583	1279.3	-0.377727	0.999918	1266.63	-0.289301	0.140147
ENSG00000008869	HEATR5B	protein_coding	586.636	-0.159924	0.658543	672.323	-0.118937	0.776629	1022.75	-0.169005	0.999918	962.814	0.0148658	0.980715
ENSG00000008952	SEC62	protein_coding	1022.51	0.00781304	0.986379	1297.37	0.121949	0.747229	1517.2	-0.179231	0.999918	1601.59	0.0265485	0.959387
ENSG00000008988	RPS20	protein_coding	8568.46	0.484379	0.0159041	10534.6	0.397626	0.0160697	3169.39	0.125624	0.999918	4251.1	0.098829	0.637888
ENSG00000009307	CSDE1	protein_coding	8698.88	0.197898	0.385098	10896.2	0.109741	0.723422	10248.2	0.123555	0.999918	12627.6	0.108876	0.490235
ENSG00000009335	UBE3C	protein_coding	578.871	-0.0360322	0.934832	603.121	0.107037	0.818041	501.692	-0.0827577	0.999918	441.822	-0.256011	1
ENSG00000009413	REV3L	protein_coding	1560.07	-0.0451118	0.911159	1375	-0.0110663	0.986449	1862.83	-0.130462	0.999918	1818.14	0.0205392	0.969282
ENSG00000009694	TENM1	protein_coding	71.2766	-1.31308	1	17.3555	-0.851574	1	1110.59	0.451263	0.999918	303.516	0.168933	1
ENSG00000009709	PAX7	protein_coding	21.576	-0.873968	1	1.12989	-1.46271	1	21.5811	1.49255	0.999918	4.30422	-0.159674	1
ENSG00000009724	MASP2	protein_coding	0.590994	-1.05544	1	0.519246	1.16368	1	2.85118	1.10489	0.999918	1.68824	-1.47442	1
ENSG00000009765	IYD	protein_coding	0.648029	-1.05313	1	0.47586	0.283148	1	8.11678	1.14407	0.999918	3.50745	1.33254	1
ENSG00000009780	FAM76A	protein_coding	125.528	0.133429	1	142.067	-0.0961318	0.909674	178.564	-0.0116081	0.999918	187.926	0.169369	1
ENSG00000009790	TRAF3IP3	protein_coding	0.329591	-1.47671	1	0.170209	0.952709	1	2.54113	1.48717	0.999918	0.599043	-0.5801	1
ENSG00000009830	POMT2	protein_coding	247.346	-0.122657	0.82618	248.94	-0.166585	0.7685	150.543	0.00533968	0.999918	145.503	-0.152591	1
ENSG00000009844	VTA1	protein_coding	839.06	0.188324	0.519731	949.817	0.214064	0.493861	770.406	-0.0102834	0.999918	765.134	-0.0446069	0.94034
ENSG00000009950	MLXIPL	protein_coding	1.68972	-1.84646	1	0.674677	2.45677	1	4.14223	1.07528	0.999918	1.41373	1.18863	1
ENSG00000009954	BAZ1B	protein_coding	2179.96	-0.157482	0.539043	2147.65	-0.0964445	0.818041	2278	-0.0214238	0.999918	2860.17	-0.11773	0.56651
ENSG00000010017	RANBP9	protein_coding	522.557	-0.0185715	0.969706	719.622	0.02421	0.967729	1155.37	-0.0653952	0.999918	1351.21	0.134575	0.629414
ENSG00000010030	ETV7	protein_coding	0.7871	-0.159927	1	1.93699	-0.463841	1	1.90728	2.55244	0.999918	2.40489	0.117162	1
ENSG00000010072	SPRTN	protein_coding	202.213	0.0200835	0.97706	227.848	0.266799	0.614927	173.864	0.178787	0.999918	213.109	0.0410786	1
ENSG00000010165	METTL13	protein_coding	162.217	0.273162	1	171.949	0.145419	0.837665	74.0976	-0.28292	0.999918	73.6873	-0.0719705	1
ENSG00000010219	DYRK4	protein_coding	258.484	0.21304	0.638324	293.192	0.115973	0.852834	79.2365	0.0497492	0.999918	128.526	-0.237955	1
ENSG00000010244	ZNF207	protein_coding	2643.54	0.0460621	0.893968	2981.61	0.0614454	0.868426	1912.23	-0.0371901	0.999918	1991.12	0.0144771	0.978411
ENSG00000010256	UQCRC1	protein_coding	1106.73	0.29528	0.211069	1128.49	0.085614	0.831401	447.566	0.205125	0.999918	429.435	-0.243478	1
ENSG00000010270	STARD3NL	protein_coding	878.037	0.289997	0.259425	1159.58	0.29887	0.27562	805.25	-0.102915	0.999918	880.15	-0.128217	0.709956
ENSG00000010278	CD9	protein_coding	23.3586	0.972223	1	4.76508	1.83903	1	5.38617	1.25224	0.999918	2.2051	1.6126	1
ENSG00000010282	HHATL	protein_coding	0.18443	-0.692072	1	0	0	1	0.947407	0.0667637	0.999918	1.50058	1.23985	1
ENSG00000010292	NCAPD2	protein_coding	1252.66	-0.0386966	0.924021	1128.2	-0.200673	0.540879	203.806	0.176919	0.999918	231.851	-0.0586497	1
ENSG00000010295	IFFO1	protein_coding	137.093	-0.00787025	1	143.242	0.029413	0.978412	86.6378	-0.116241	0.999918	97.3737	-0.00855633	1
ENSG00000010310	GIPR	protein_coding	6.21337	-0.432704	1	23.9885	-0.497995	1	15.1851	-0.035357	0.999918	19.791	0.440314	1
ENSG00000010318	PHF7	protein_coding	41.6411	0.347655	1	61.5489	-0.266886	1	42.5572	0.103548	0.999918	48.8644	-0.133092	1
ENSG00000010319	SEMA3G	protein_coding	3.56705	-2.27628	1	1.66896	-1.90658	1	7.37192	1.01369	0.999918	4.18648	1.01156	1
ENSG00000010322	NISCH	protein_coding	944.588	-0.327326	0.187794	955.369	-0.338536	0.184365	1485.45	-0.127728	0.999918	1358.36	-0.386577	0.0225756
ENSG00000010327	STAB1	protein_coding	0.628952	0.212574	1	2.97609	0.0645295	1	5.25354	1.91425	0.999918	5.83063	0.589025	1
ENSG00000010361	FUZ	protein_coding	115.058	0.19573	1	112.073	-0.240166	0.758696	42.0355	-0.253726	0.999918	37.8155	-0.342922	1
ENSG00000010379	SLC6A13	protein_coding	1.43538	-0.285102	1	2.00706	0.865179	1	4.43631	0.733682	0.999918	3.54226	0.98701	1
ENSG00000010404	IDS	protein_coding	353.808	-0.453628	0.135483	344.232	-0.435624	0.176448	1970.79	-0.0632189	0.999918	1821.37	0.0457033	0.913981
ENSG00000010438	PRSS3	protein_coding	0.170731	1.09311	1	0	0	1	1.21324	-0.382348	0.999918	0.703066	-0.563775	1
ENSG00000010539	ZNF200	protein_coding	178.5	0.109407	1	183.533	0.174158	0.80214	130.006	-0.0914532	0.999918	127.094	-0.199079	1
ENSG00000010610	CD4	protein_coding	8.88896	-0.425258	1	4.45834	-0.995303	1	4.03169	-1.58194	0.999918	2.87389	-0.123951	1
ENSG00000010626	LRRC23	protein_coding	57.3913	-0.0985176	1	72.3514	0.0733157	1	69.0363	-0.202458	0.999918	72.9002	-0.286851	1
ENSG00000010671	BTK	protein_coding	1.50283	-0.187063	1	1.7949	-0.522041	1	3.41558	1.15397	0.999918	3.29957	1.01109	1
ENSG00000010704	HFE	protein_coding	6.83163	-0.303519	1	4.64647	0.152028	1	3.77853	1.73155	0.999918	3.20978	2.62364	1
ENSG00000010803	SCMH1	protein_coding	394.3	0.114682	0.795143	228.954	-0.144876	0.819785	814.594	-0.215949	0.999918	395.159	-0.373112	1
ENSG00000010810	FYN	protein_coding	944.609	-0.288833	0.262935	840.172	-0.238218	0.399042	2110.01	-0.226399	0.999918	2011.92	-0.0677139	0.839337
ENSG00000010818	HIVEP2	protein_coding	370.53	-0.543471	0.0591036	399.235	-0.443114	0.175928	914.799	-0.102701	0.999918	634.784	0.0205399	0.979811
ENSG00000010932	FMO1	protein_coding	0.789123	-2.92605	1	0	0	1	5.87467	3.35808	0.999918	1.02351	2.94811	1
ENSG00000011007	ELOA	protein_coding	609.573	-0.355602	0.182217	684.579	-0.242127	0.441024	1200.25	-0.0649583	0.999918	1319.08	-0.0138799	0.980715
ENSG00000011009	LYPLA2	protein_coding	407.248	0.170569	0.665803	415.13	0.0840733	0.88966	322.903	-0.14521	0.999918	276.828	-0.149023	1
ENSG00000011021	CLCN6	protein_coding	200.818	-0.524148	0.1759	239.585	-0.140652	0.828517	495.323	0.1168	0.999918	456.806	-0.11092	1
ENSG00000011028	MRC2	protein_coding	369.971	-0.273168	0.443396	433.41	-0.305819	0.448867	21.6905	1.70638	0.999918	21.4891	0.158773	1
ENSG00000011052	NME1-NME2	protein_coding	0	0	1	0	0	1	0	0	1	0	0	1
ENSG00000011083	SLC6A7	protein_coding	0.282711	-1.46302	1	0.506503	-0.297199	1	4.77411	0.720457	0.999918	4.71066	1.15574	1
ENSG00000011105	TSPAN9	protein_coding	125.747	0.308372	1	163.289	0.199835	0.757387	51.6196	-0.180298	0.999918	32.2183	-0.344882	1
ENSG00000011114	BTBD7	protein_coding	618.683	0.0237262	0.960802	763.51	0.0687631	0.889362	568.081	-0.095363	0.999918	692.516	-0.0494032	0.93562
ENSG00000011132	APBA3	protein_coding	68.9721	0.308808	1	73.44	0.122226	1	37.5531	0.148406	0.999918	33.8342	-0.324842	1
ENSG00000011143	MKS1	protein_coding	208.41	0.0270549	0.96791	233.761	-0.12368	0.846768	65.6609	-0.305951	0.999918	82.1487	-0.0377166	1
ENSG00000011198	ABHD5	protein_coding	127.815	-0.0332844	1	127.238	0.169959	0.840128	102.141	-0.258273	0.999918	89.9379	-0.196138	1
ENSG00000011201	ANOS1	protein_coding	788.449	0.239155	0.479339	24.443	0.982574	1	96.1106	0.839991	0.999918	28.0671	0.734726	1
ENSG00000011243	AKAP8L	protein_coding	485.046	-0.116025	0.772046	567.494	-0.139595	0.73525	688.894	0.0350939	0.999918	707.452	0.0558457	0.931228
ENSG00000011258	MBTD1	protein_coding	1138.08	-0.0645838	0.860614	1310.73	0.0677096	0.878775	790.399	0.0401319	0.999918	932	0.189466	0.486348
ENSG00000011260	UTP18	protein_coding	470.347	0.276545	0.395083	542.738	0.267527	0.439595	117.804	-0.060092	0.999918	123.842	0.0700671	1
ENSG00000011275	RNF216	protein_coding	481.529	-0.0932901	0.82727	535.811	-0.0684111	0.895896	582.697	0.00659609	0.999918	655.448	-0.142356	0.709863
ENSG00000011295	TTC19	protein_coding	565.982	0.0227628	0.965388	540.773	0.086983	0.863444	597.393	-0.0499955	0.999918	576.696	-0.0105604	1
ENSG00000011304	PTBP1	protein_coding	1284.31	0.159052	0.568809	1414.94	-0.0124574	0.981179	313.445	0.0829827	0.999918	370.878	-0.156644	1
ENSG00000011332	DPF1	protein_coding	162.478	-0.208285	1	150.264	-0.223073	0.737577	683.194	-0.327713	0.999918	474.501	-0.0847318	1
ENSG00000011347	SYT7	protein_coding	68.6491	-0.716944	1	39.0122	-0.499613	1	735.385	-0.018509	0.999918	295.638	-0.0768423	1
ENSG00000011376	LARS2	protein_coding	421.879	-0.0682053	0.887541	443.148	-0.0213973	0.976055	183.798	-0.0496941	0.999918	187.835	-0.153081	1
ENSG00000011405	PIK3C2A	protein_coding	1299.2	0.06716	0.850018	1555.57	0.0797318	0.836011	940.201	-0.0415343	0.999918	1146.09	0.221252	0.361779
ENSG00000011422	PLAUR	protein_coding	20.9203	0.0543464	1	36.0272	0.0502034	1	2.42634	-0.129485	0.999918	3.49738	-0.891765	1
ENSG00000011426	ANLN	protein_coding	1042.49	0.220057	0.484254	1216.82	0.111369	0.790901	103.404	0.561764	0.999918	142.469	0.353102	1
ENSG00000011451	WIZ	protein_coding	261.499	-0.23217	0.59205	230.61	-0.23473	0.686792	551.767	-0.0352385	0.999918	473.806	-0.284956	1
ENSG00000011454	RABGAP1	protein_coding	1165.03	-0.0428635	0.909518	1204.63	0.0431266	0.926545	990.378	-0.108965	0.999918	1003.04	0.00319414	0.992504
ENSG00000011465	DCN	protein_coding	2.46499	0.426656	1	4.18366	1.12025	1	13.791	0.345895	0.999918	8.42685	1.45357	1
ENSG00000011478	QPCTL	protein_coding	54.6829	0.0335155	1	53.0258	0.0496429	1	21.758	-0.00227587	0.999918	19.3259	0.224872	1
ENSG00000011485	PPP5C	protein_coding	442.648	-0.0352922	0.940607	465.357	0.0213704	0.975251	433.811	0.0730901	0.999918	408.729	-0.055909	1
ENSG00000011523	CEP68	protein_coding	606.972	-0.144797	0.681544	571.156	-0.0913491	0.861561	544.94	-0.0750812	0.999918	653.404	-0.0345063	0.960582
ENSG00000011566	MAP4K3	protein_coding	716.626	-0.0756683	0.851002	788.268	-0.053677	0.913575	1130.78	-0.133916	0.999918	1148.03	0.140483	0.648864
ENSG00000011590	ZBTB32	protein_coding	0.326047	0.203465	1	0	0	1	1.19841	1.68201	0.999918	1.92003	-0.340344	1
ENSG00000011600	TYROBP	protein_coding	0.290321	-1.08342	1	0.660676	-0.0246566	1	0.961656	0.238166	0.999918	0.286166	1.54917	1
ENSG00000011638	TMEM159	protein_coding	201.945	0.0210078	0.97706	196	-0.0416165	0.965645	27.1909	0.551861	0.999918	30.1711	-0.547191	1
ENSG00000011677	GABRA3	protein_coding	70.7335	-0.711833	1	106.583	-0.562723	0.292613	1669.47	0.00573762	0.999918	1462.61	-0.275607	0.195697
ENSG00000012048	BRCA1	protein_coding	853.884	0.0789398	0.83121	824.784	0.074929	0.883149	89.1031	-0.0178536	0.999918	104.759	0.513683	1
ENSG00000012061	ERCC1	protein_coding	589.194	0.112345	0.780761	696.18	0.0554041	0.909024	330.9	0.0970153	0.999918	332.332	-0.248188	1
ENSG00000012124	CD22	protein_coding	0	0	1	0.337339	1.73401	1	3.55191	0.410096	0.999918	1.85191	0.223977	1
ENSG00000012171	SEMA3B	protein_coding	11.5909	-0.462551	1	11.1775	-0.596148	1	8.54435	0.105329	0.999918	8.14112	-0.459731	1
ENSG00000012174	MBTPS2	protein_coding	99.4987	0.0912278	1	102.172	-0.274736	0.720154	81.3572	0.317522	0.999918	90.5101	0.0949219	1
ENSG00000012211	PRICKLE3	protein_coding	3.12176	0.115782	1	5.51357	-0.504347	1	0.947407	0.0667637	0.999918	1.01026	-1.86299	1
ENSG00000012223	LTF	protein_coding	0.18443	-0.692072	1	0	0	1	1.39467	0.164052	0.999918	2.7762	-0.15633	1
ENSG00000012232	EXTL3	protein_coding	1033.3	-0.220548	0.390298	1008.59	-0.0472292	0.9183	645.25	0.0257176	0.999918	539.973	-0.209349	1
ENSG00000012504	NR1H4	protein_coding	0.137551	-0.670093	1	0.161036	0.936026	1	1.80245	-0.341322	0.999918	2.60525	3.10718	1
ENSG00000012660	ELOVL5	protein_coding	1265.34	0.108397	0.738389	1655.26	0.0793105	0.837395	1259.83	0.266366	0.999918	1376.9	0.230514	0.341108
ENSG00000012779	ALOX5	protein_coding	2.42811	-1.70044	1	1.3564	0.745836	1	1.1948	0.710199	0.999918	0.77679	-0.244684	1
ENSG00000012817	KDM5D	protein_coding	479.716	-0.222372	0.548168	575.551	-0.0748861	0.882066	336.458	-0.0026691	0.999918	342.511	-0.00168061	1
ENSG00000012822	CALCOCO1	protein_coding	366.33	-0.299613	0.403853	421.117	-0.224917	0.589061	1272.56	-0.0426704	0.999918	1681.07	-0.127959	0.616396
ENSG00000012963	UBR7	protein_coding	515.588	0.0484546	0.917379	612.889	-0.0532639	0.923681	297.98	0.214671	0.999918	306.95	0.0182962	1
ENSG00000012983	MAP4K5	protein_coding	917.402	0.000993995	0.997614	980.384	-0.048831	0.916717	1132.44	-0.0281956	0.999918	1181.05	0.0663387	0.871364
ENSG00000013016	EHD3	protein_coding	94.4563	0.137554	1	121.098	0.123384	0.88966	97.7958	-0.0278284	0.999918	111.594	-0.565028	1
ENSG00000013275	PSMC4	protein_coding	619.553	0.124282	0.738605	695.751	0.160833	0.67298	615.149	-0.0898076	0.999918	629.483	-0.175286	1
ENSG00000013288	MAN2B2	protein_coding	103.646	-0.332696	1	119.652	-0.256306	0.719663	163.866	-0.104743	0.999918	143.191	-0.0903936	1
ENSG00000013293	SLC7A14	protein_coding	13.3348	-1.80071	1	3.44022	-0.623123	1	172.525	-0.188915	0.999918	44.9694	-0.187408	1
ENSG00000013297	CLDN11	protein_coding	7.20505	-0.932159	1	7.39777	-0.8361	1	3.13901	0.749844	0.999918	2.65011	-1.9844	1
ENSG00000013306	SLC25A39	protein_coding	335.592	0.257503	0.491583	316.2	0.16586	0.737901	178.543	-0.20211	0.999918	157.817	-0.171297	1
ENSG00000013364	MVP	protein_coding	36.6458	-0.0986009	1	32.5123	-0.640803	1	14.9208	-0.113596	0.999918	12.3407	0.0564391	1
ENSG00000013374	NUB1	protein_coding	497.879	0.117038	0.774129	581.742	0.100833	0.83327	589.373	0.0121846	0.999918	652.985	0.135297	0.721336
ENSG00000013375	PGM3	protein_coding	833.003	0.0111088	0.981651	979.624	0.0676063	0.895183	346.434	-0.122031	0.999918	400.978	0.231647	1
ENSG00000013392	RWDD2A	protein_coding	88.2226	-0.0292081	1	97.2726	-0.0129067	0.9919	118.969	-0.116492	0.999918	95.7118	0.352708	1
ENSG00000013441	CLK1	protein_coding	945.13	-0.280854	0.24896	1171.19	-0.0756203	0.856752	1342.17	0.0215759	0.999918	1602.61	0.16902	0.446274
ENSG00000013503	POLR3B	protein_coding	192.847	0.140771	1	218.2	0.058947	0.943856	227.859	-0.173571	0.999918	252.023	-0.058492	1
ENSG00000013523	ANGEL1	protein_coding	217.207	0.00944693	0.98891	207.872	-0.252497	0.636028	76.4983	-0.260062	0.999918	70.4161	0.0627539	1
ENSG00000013561	RNF14	protein_coding	409.261	0.0349455	0.944046	504.073	-0.0461758	0.942161	499.795	0.144384	0.999918	498.613	-0.100899	1
ENSG00000013563	DNASE1L1	protein_coding	72.6223	-0.0137162	1	76.8584	-0.237664	1	48.1732	0.105847	0.999918	48.811	0.0970612	1
ENSG00000013573	DDX11	protein_coding	319.543	0.00849399	0.98891	303.294	-0.189179	0.715182	35.3551	0.307972	0.999918	35.9838	-0.611742	1
ENSG00000013583	HEBP1	protein_coding	73.7344	0.119475	1	43.5914	0.344361	1	12.1903	0.761365	0.999918	19.3028	-0.240833	1
ENSG00000013588	GPRC5A	protein_coding	16.8312	-0.579271	1	0.64607	1.31613	1	6.28746	1.67493	0.999918	3.85683	2.05815	1
ENSG00000013619	MAMLD1	protein_coding	19.02	-0.803848	1	22.8041	-1.11294	1	25.6703	-0.448764	0.999918	12.8815	-0.248076	1
ENSG00000013725	CD6	protein_coding	0	0	1	0.477787	-0.291729	1	1.71735	0.393526	0.999918	2.71084	0.0312831	1
ENSG00000013810	TACC3	protein_coding	296.779	0.176375	0.68426	260.327	-0.000469753	0.999966	18.6964	0.462391	0.999918	22.2691	-0.134859	1
ENSG00000014123	UFL1	protein_coding	831.619	-0.0546418	0.899139	953.505	-0.0291587	0.958256	293.702	0.084341	0.999918	370.316	0.181326	1
ENSG00000014138	POLA2	protein_coding	382.187	0.140804	0.738605	351.746	0.041754	0.954782	55.9044	-0.122462	0.999918	63.3663	0.0784832	1
ENSG00000014164	ZC3H3	protein_coding	75.8038	-0.351678	1	65.6608	-0.109584	1	53.8568	-0.0996806	0.999918	46.0214	-0.536196	1
ENSG00000014216	CAPN1	protein_coding	286.902	-0.0725872	0.904524	221.799	-0.0752253	0.916717	598.276	-0.276788	0.999918	557.275	-0.156154	1
ENSG00000014257	ACPP	protein_coding	1.04805	0.909272	1	0	0	1	2.16469	1.95653	0.999918	1.36581	0.117917	1
ENSG00000014641	MDH1	protein_coding	1327.14	0.435212	0.0430042	1414.6	0.322641	0.220384	578.686	-0.0232456	0.999918	475.805	-0.114493	1
ENSG00000014824	SLC30A9	protein_coding	1673.83	0.131086	0.670418	1970.2	0.246257	0.366238	1517.23	-0.110445	0.999918	1593.3	0.0757082	0.830734
ENSG00000014914	MTMR11	protein_coding	17.902	-0.0224837	1	13.8555	-0.848475	1	5.02124	0.290712	0.999918	3.9055	0.175363	1
ENSG00000014919	COX15	protein_coding	528.249	0.0478338	0.916767	553.125	-0.149398	0.726846	249.348	-0.107199	0.999918	288.629	-0.079399	1
ENSG00000015133	CCDC88C	protein_coding	284.272	0.0930088	0.859627	175.718	-0.147266	0.83327	393.696	0.0305584	0.999918	327.872	-0.148669	1
ENSG00000015153	YAF2	protein_coding	273.006	-0.081319	0.884229	305.545	0.110166	0.854303	468.78	0.0808579	0.999918	451.868	0.100682	1
ENSG00000015171	ZMYND11	protein_coding	980.672	-0.108302	0.750867	1100.45	-0.0294367	0.959712	2017.48	-0.0290117	0.999918	2099.34	-0.0347207	0.94034
ENSG00000015285	WAS	protein_coding	3.55427	-1.34195	1	2.85921	-0.0535679	1	6.46067	1.09849	0.999918	8.07124	0.164682	1
ENSG00000015413	DPEP1	protein_coding	0.840069	-1.73432	1	2.72573	-1.13263	1	1.64695	2.40243	0.999918	1.55819	-0.634478	1
ENSG00000015475	BID	protein_coding	101.993	0.343597	1	91.4191	0.537353	1	76.2799	-0.0126396	0.999918	78.5841	-0.32949	1
ENSG00000015479	MATR3	protein_coding	8.18985	-0.649263	1	7.51609	0.354201	1	1.04997	2.72961	0.999918	1.34597	-0.770201	1
ENSG00000015520	NPC1L1	protein_coding	1.04999	0.917344	1	0.821465	0.85896	1	1.75143	3.03603	0.999918	2.29027	-0.685708	1
ENSG00000015532	XYLT2	protein_coding	174.336	0.169106	1	176.018	0.0236405	0.981179	52.8483	0.240327	0.999918	64.4982	-0.00121455	1
ENSG00000015568	RGPD5	protein_coding	0	0	1	0	0	1	0	0	1	0	0	1
ENSG00000015592	STMN4	protein_coding	414.989	-0.850218	0.589888	260.609	-0.55094	0.0969467	1268.41	0.0115766	0.999918	1383.24	-0.0204287	0.970859
ENSG00000015676	NUDCD3	protein_coding	620.424	-0.101419	0.790636	634.47	-0.0509493	0.922283	746.993	-0.113068	0.999918	587.789	-0.224406	1
ENSG00000016082	ISL1	protein_coding	24.9368	-1.8197	1	85.0624	-0.130343	1	674.052	0.562223	0.999918	516.501	0.116677	1
ENSG00000016391	CHDH	protein_coding	45.5921	0.258412	1	37.0592	0.098562	1	8.13836	-0.0870469	0.999918	6.82917	-0.452388	1
ENSG00000016402	IL20RA	protein_coding	0.368861	-1.10301	1	0.500301	0.932109	1	3.45351	1.05895	0.999918	3.34884	2.23277	1
ENSG00000016490	CLCA1	protein_coding	0.308283	0.214175	1	0.321164	0.054536	1	4.92327	1.22852	0.999918	1.6315	1.51339	1
ENSG00000016602	CLCA4	protein_coding	0.188496	1.07965	1	0	0	1	1.33677	0.361066	0.999918	2.0106	3.76765	1
ENSG00000016864	GLT8D1	protein_coding	458.237	0.112436	0.786511	521.817	0.0250866	0.970844	217.911	-0.101962	0.999918	225.487	-0.0894978	1
ENSG00000017260	ATP2C1	protein_coding	1050.02	0.0132689	0.97706	1084.9	-0.0568695	0.903299	701.068	-0.0352079	0.999918	695.988	0.000559721	0.999686
ENSG00000017427	IGF1	protein_coding	0.321982	-1.47213	1	0.153789	-0.81843	1	5.9811	1.11741	0.999918	3.09348	4.29086	1
ENSG00000017483	SLC38A5	protein_coding	2.22243	-0.328537	1	1.51303	-0.269903	1	3.66131	-0.456544	0.999918	2.72753	1.42654	1
ENSG00000017797	RALBP1	protein_coding	680.817	0.169241	0.608335	793.826	0.14029	0.727192	512.547	0.0904138	0.999918	606.664	-0.0509905	1
ENSG00000018189	RUFY3	protein_coding	2469.76	-0.458397	0.0590314	3262	-0.229533	0.395875	6351.74	-0.10502	0.999918	7561.34	0.094672	0.661032
ENSG00000018236	CNTN1	protein_coding	144.093	-0.610631	1	102.092	-0.909196	0.107684	1495.49	0.0215532	0.999918	345.422	-0.178152	1
ENSG00000018280	SLC11A1	protein_coding	1.98786	1.09443	1	3.2267	-0.00816445	1	4.53846	0.365575	0.999918	3.39987	-0.976702	1
ENSG00000018408	WWTR1	protein_coding	64.3288	0.109529	1	65.5396	-0.241234	1	19.7665	0.475366	0.999918	22.8492	0.709422	1
ENSG00000018510	AGPS	protein_coding	1162.45	0.0939276	0.801475	1439.38	0.0353566	0.947755	813.042	0.0331703	0.999918	828.021	-0.0184216	0.978411
ENSG00000018607	ZNF806	unprocessed_pseudogene	2.62439	0.707324	1	3.36854	0.0334478	1	3.40622	0.193938	0.999918	2.88986	0.0332226	1
ENSG00000018610	CXorf56	protein_coding	251.828	0.195557	0.67055	331.033	0.408169	0.223077	222.592	0.173966	0.999918	256.233	0.0985405	1
ENSG00000018625	ATP1A2	protein_coding	84.4555	-0.154908	1	50.5893	-1.16031	1	10.0704	1.45004	0.999918	2.1807	0.436413	1
ENSG00000018699	TTC27	protein_coding	228.541	0.266351	0.542656	233.231	0.145777	0.819785	68.0904	0.0545974	0.999918	77.9538	-0.301389	1
ENSG00000018869	ZNF582	protein_coding	55.8787	-0.378951	1	75.9664	0.333841	1	46.8548	0.324952	0.999918	56.5273	-0.0739642	1
ENSG00000019102	VSIG2	protein_coding	0	0	1	0.333769	0.0565794	1	1.14392	0.20494	0.999918	2.77708	1.06237	1
ENSG00000019144	PHLDB1	protein_coding	560.316	-0.0377006	0.937017	599.829	-0.233564	0.47586	875.985	-0.160176	0.999918	1069.43	-0.341094	0.0855489
ENSG00000019169	MARCO	protein_coding	0	0	1	0.170209	0.952709	1	3.17645	2.22039	0.999918	1.63971	3.74346	1
ENSG00000019186	CYP24A1	protein_coding	0.643963	-2.18848	1	0.153789	-0.81843	1	3.39342	0.662971	0.999918	3.565	2.40915	1
ENSG00000019485	PRDM11	protein_coding	96.2285	-0.369357	1	109.183	-0.236681	0.764939	90.1094	-0.376007	0.999918	95.2252	-0.251548	1
ENSG00000019505	SYT13	protein_coding	146.602	-0.878958	1	87.8612	-0.808412	1	1828.77	-0.260752	0.999918	934.274	-0.43062	0.0296202
ENSG00000019549	SNAI2	protein_coding	13.2078	0.85371	1	8.50808	1.17333	1	20.6437	1.04659	0.999918	11.4776	0.707838	1
ENSG00000019582	CD74	protein_coding	9.56365	-0.0736479	1	12.4527	-0.486394	1	1.52877	2.06352	0.999918	1.5047	-1.51587	1
ENSG00000019991	HGF	protein_coding	1.59181	-0.894549	1	4.33288	-0.0442736	1	4.5126	0.563455	0.999918	5.62817	0.724446	1
ENSG00000019995	ZRANB1	protein_coding	702.889	-0.102065	0.796088	753.019	0.00510828	0.994724	1601.59	-0.0813562	0.999918	1491.68	-0.040593	0.931228
ENSG00000020129	NCDN	protein_coding	170.753	-0.12159	1	180.264	0.0115314	0.990041	445.197	-0.244056	0.999918	335.079	-0.237916	1
ENSG00000020181	ADGRA2	protein_coding	34.4473	1.22221	1	26.7372	0.0427127	1	23.1475	0.509242	0.999918	20.5523	0.0317411	1
ENSG00000020219	CCT8L1P	processed_pseudogene	0	0	1	0.176303	0.95217	1	1.16129	1.52839	0.999918	2.35617	-0.197361	1
ENSG00000020256	ZFP64	protein_coding	151.616	-0.110952	1	147.622	-0.113449	0.889362	265.348	0.132069	0.999918	276.503	-0.106426	1
ENSG00000020426	MNAT1	protein_coding	292.054	0.338223	0.348494	332.59	0.237965	0.610077	213.732	0.0253188	0.999918	218.442	0.0101584	1
ENSG00000020577	SAMD4A	protein_coding	83.8582	0.568426	1	30.4424	0.487562	1	64.3979	0.578663	0.999918	303.82	-0.0581859	1
ENSG00000020633	RUNX3	protein_coding	0.188496	1.07965	1	0.621495	-2.20655	1	4.78896	1.07418	0.999918	2.64862	1.69196	1
ENSG00000020922	MRE11	protein_coding	682.404	0.135124	0.706656	713.322	0.10964	0.80214	123.148	0.134088	0.999918	185.393	-0.0777843	1
ENSG00000021300	PLEKHB1	protein_coding	71.114	0.372847	1	79.1606	-0.287164	1	14.0145	0.645069	0.999918	26.0322	-0.527263	1
ENSG00000021355	SERPINB1	protein_coding	6.76184	-0.296724	1	9.14819	-1.28704	1	1.63733	2.6177	0.999918	2.03624	0.284839	1
ENSG00000021461	CYP3A43	protein_coding	1.58395	0.692736	1	2.31696	-1.7213	1	1.64918	1.80684	0.999918	0.758292	-0.247652	1
ENSG00000021488	SLC7A9	protein_coding	2.49398	-1.85661	1	3.49336	0.795244	1	3.54118	1.0599	0.999918	4.85467	0.00994152	1
ENSG00000021574	SPAST	protein_coding	925.991	-0.341306	0.139172	941.01	-0.126234	0.750435	1770.13	-0.0966693	0.999918	1766.62	-0.0772209	0.813804
ENSG00000021645	NRXN3	protein_coding	230.078	-0.688234	0.524883	204.627	-0.943632	0.0152626	1020.05	-0.330348	0.999918	616.659	-0.105061	1
ENSG00000021762	OSBPL5	protein_coding	116.831	-0.210485	1	99.6678	-0.323627	0.654128	316.696	-0.198136	0.999918	200.621	-0.363057	1
ENSG00000021776	AQR	protein_coding	1281.91	-0.0755724	0.840732	1376.47	-0.00186112	0.998719	1105.55	0.114465	0.999918	1258.1	0.0738553	0.848681
ENSG00000021826	CPS1	protein_coding	1115.45	-0.0487231	0.897034	1494.5	-0.129261	0.715763	81.2554	0.647398	0.999918	56.9723	0.594702	1
ENSG00000021852	C8B	protein_coding	0.372927	0.200628	1	0.153789	-0.81843	1	3.17533	0.451369	0.999918	1.21233	0.93281	1
ENSG00000022267	FHL1	protein_coding	579.626	-0.00106016	0.997614	1201.1	-0.0588886	0.893229	845.726	-0.106384	0.999918	1287.69	-0.144757	0.605677
ENSG00000022277	RTFDC1	protein_coding	634.934	0.218636	0.495243	668.878	0.206506	0.533305	479.982	-0.122683	0.999918	542.527	-0.110079	1
ENSG00000022355	GABRA1	protein_coding	12.8504	-1.08863	1	6.9553	-1.40915	1	267.697	0.231366	0.999918	657.997	0.240221	0.415513
ENSG00000022556	NLRP2	protein_coding	317.557	0.126592	0.850126	278.241	-0.0349172	0.972571	262.722	-0.0597597	0.999918	273.187	0.14908	1
ENSG00000022567	SLC45A4	protein_coding	74.7342	0.177301	1	94.2456	0.0917251	0.941535	110.577	-0.088378	0.999918	85.3035	-0.175466	1
ENSG00000022840	RNF10	protein_coding	547.127	-0.0231657	0.962292	433.864	-0.0130639	0.98652	725.316	-0.103554	0.999918	654.729	-0.297953	0.291569
ENSG00000022976	ZNF839	protein_coding	168.195	-0.158077	1	190.525	-0.134458	0.845589	113.213	-0.25508	0.999918	112.735	0.120126	1
ENSG00000023041	ZDHHC6	protein_coding	445.731	0.113027	0.798671	467.523	0.163174	0.731068	261.73	-0.106141	0.999918	318.234	0.107849	1
ENSG00000023171	GRAMD1B	protein_coding	156.556	-0.00995143	1	109.379	-0.212588	0.816112	169.445	-0.15345	0.999918	120.955	-0.169167	1
ENSG00000023191	RNH1	protein_coding	336.432	0.106521	0.827288	372.29	-0.0118115	0.98848	135.336	-0.170194	0.999918	130.605	-0.510327	1
ENSG00000023228	NDUFS1	protein_coding	1468.58	-0.0211231	0.959904	1742.07	0.15081	0.658668	1826.19	-0.137187	0.999918	1953.38	-0.0712359	0.830371
ENSG00000023287	RB1CC1	protein_coding	1656.97	-0.0980379	0.77327	1751.31	0.0891137	0.837665	2109.7	-0.0412217	0.999918	2399.38	0.139916	0.510921
ENSG00000023318	ERP44	protein_coding	476.13	-0.0354304	0.940774	659.412	0.0752093	0.883642	574.373	0.00722597	0.999918	694.803	-0.101264	0.830371
ENSG00000023330	ALAS1	protein_coding	323.083	-0.0647888	0.898842	339.482	0.00187145	0.999467	557.725	0.00971456	0.999918	540.938	-0.20039	1
ENSG00000023445	BIRC3	protein_coding	3.90263	1.00765	1	7.74818	0.663148	1	6.14357	1.46525	0.999918	5.56925	1.52728	1
ENSG00000023516	AKAP11	protein_coding	1019.14	-0.131733	0.687498	1329.86	-0.155706	0.651223	1507.33	-0.0321345	0.999918	1771.85	0.0472407	0.905359
ENSG00000023572	GLRX2	protein_coding	30.1566	0.0125819	1	36.319	0.808664	1	19.565	0.080613	0.999918	33.4114	0.394576	1
ENSG00000023608	SNAPC1	protein_coding	132.065	0.284965	1	133.073	0.293762	0.638891	34.8812	-0.201124	0.999918	35.5735	0.385941	1
ENSG00000023697	DERA	protein_coding	341.529	0.324168	0.366525	271.947	0.362857	0.374861	35.3986	0.538405	0.999918	57.4593	0.347337	1
ENSG00000023734	STRAP	protein_coding	1579.46	0.0961613	0.774129	1822.86	0.0777057	0.856626	1856.79	0.103265	0.999918	2077.65	0.147193	0.523705
ENSG00000023839	ABCC2	protein_coding	12.8775	-0.0973824	1	16.6647	0.301652	1	11.4249	0.141771	0.999918	16.5644	0.199213	1
ENSG00000023892	DEF6	protein_coding	9.00536	0.558952	1	11.5922	0.0823494	1	4.39961	-0.339918	0.999918	4.49394	0.363349	1
ENSG00000023902	PLEKHO1	protein_coding	401.827	-0.203596	0.596103	442.911	0.0193865	0.981114	499.042	-0.141082	0.999918	475.349	-0.339975	1
ENSG00000023909	GCLM	protein_coding	65.7327	0.151511	1	55.5848	0.205421	1	56.5527	0.231504	0.999918	76.4869	0.312551	1
ENSG00000024048	UBR2	protein_coding	771.619	-0.112485	0.756045	901.466	-0.0459447	0.924022	728.247	-0.133275	0.999918	866.653	0.0150103	0.980799
ENSG00000024422	EHD2	protein_coding	2.14191	-0.228717	1	1.00845	1.8364	1	2.07226	0.419616	0.999918	4.48491	0.8935	1
ENSG00000024526	DEPDC1	protein_coding	695.012	0.263336	0.441854	760.288	0.0834161	0.854624	29.4664	1.54305	0.999918	35.2294	0.734881	1
ENSG00000024862	CCDC28A	protein_coding	101.1	0.476446	1	104.52	0.332563	0.638891	32.0772	0.270453	0.999918	36.3833	0.197335	1
ENSG00000025039	RRAGD	protein_coding	585.452	-0.0166843	0.97706	978.024	-0.206893	0.507965	415.815	-0.0164258	0.999918	424.367	0.00175874	1
ENSG00000025156	HSF2	protein_coding	700.15	0.201674	0.507194	870.174	0.136711	0.736543	935.968	-0.135332	0.999918	934.384	0.192262	0.490405
ENSG00000025293	PHF20	protein_coding	504.95	0.0942949	0.827556	471.472	0.0463834	0.940639	311.717	-0.220163	0.999918	311.193	0.0603454	1
ENSG00000025423	HSD17B6	protein_coding	9.60828	0.570479	1	16.2631	0.57866	1	6.60532	-0.189681	0.999918	7.31236	-0.141931	1
ENSG00000025434	NR1H3	protein_coding	60.7044	0.691408	1	72.5127	0.276675	1	30.7498	-0.260448	0.999918	24.2645	-0.539661	1
ENSG00000025708	TYMP	protein_coding	2.65126	-0.919614	1	4.7917	-1.10249	1	0.631333	-1.00471	0.999918	0.540602	-1.02802	1
ENSG00000025770	NCAPH2	protein_coding	456.434	-0.0261919	0.959904	421.432	-0.000443962	0.999966	156.43	-0.265465	0.999918	118.783	-0.353915	1
ENSG00000025772	TOMM34	protein_coding	261.558	0.383081	0.296342	269.247	0.1099	0.863192	138.334	0.0268198	0.999918	175.343	-0.100223	1
ENSG00000025796	SEC63	protein_coding	359.985	-0.129005	0.7698	330.542	-0.000229046	0.999977	383.239	-0.124992	0.999918	477.601	0.171592	1
ENSG00000025800	KPNA6	protein_coding	878.163	-0.105953	0.756726	967.233	-0.0845786	0.856626	1090.41	-0.0440606	0.999918	1119.14	-0.076607	0.848681
ENSG00000026025	VIM	protein_coding	13416.2	0.131009	0.669531	11717.6	0.213845	0.439926	4316.75	0.551912	0.999918	6311.58	0.326609	0.912505
ENSG00000026036	RTEL1-TNFRSF6B	protein_coding	0	0	1	0	0	1	0	0	1	0	0	1
ENSG00000026103	FAS	protein_coding	61.112	0.908424	1	87.7696	0.527368	1	8.12906	0.0280453	0.999918	7.09145	0.460143	1
ENSG00000026297	RNASET2	protein_coding	40.9432	0.278654	1	41.1125	0.0753758	1	12.6623	-0.242754	0.999918	9.37784	-0.379463	1
ENSG00000026508	CD44	protein_coding	3.7298	-1.74592	1	2.46699	1.13112	1	7.5727	0.221861	0.999918	11.0801	-0.846605	1
ENSG00000026559	KCNG1	protein_coding	10.9427	0.499836	1	13.0481	0.13979	1	4.16649	0.417765	0.999918	22.5147	-0.477918	1
ENSG00000026652	AGPAT4	protein_coding	1110.4	-0.105033	0.774129	1143.77	-0.129972	0.731068	1154.14	-0.0362341	0.999918	994.095	-0.0709138	0.888454
ENSG00000026751	SLAMF7	protein_coding	0.18443	-0.692072	1	0	0	1	1.5558	0.0824814	0.999918	0.440998	-0.318044	1
ENSG00000026950	BTN3A1	protein_coding	111.06	-0.00265791	1	200.619	-0.23266	0.694616	60.1176	-0.716487	0.999918	71.9047	-0.252525	1
ENSG00000027001	MIPEP	protein_coding	143.122	0.332628	1	122.315	0.448667	0.4055	37.8524	0.243544	0.999918	42.7634	0.118412	1
ENSG00000027075	PRKCH	protein_coding	0.852653	0.0306417	1	0.846504	0.418741	1	3.8403	0.144339	0.999918	1.61978	1.90515	1
ENSG00000027644	INSRR	protein_coding	2.21894	-0.271209	1	16.8389	-2.13058	1	37.7259	-0.0435096	0.999918	249.957	-0.403846	1
ENSG00000027697	IFNGR1	protein_coding	312.922	0.191628	0.643016	422.59	0.173036	0.723519	289.512	-0.0318356	0.999918	299.252	0.0706638	1
ENSG00000027847	B4GALT7	protein_coding	135.662	0.373916	1	154.889	0.188102	0.787881	93.8355	-0.30644	0.999918	88.1666	-0.425442	1
ENSG00000027869	SH2D2A	protein_coding	2.82707	0.366705	1	3.73253	1.01754	1	2.51246	1.49252	0.999918	1.49976	-0.520913	1
ENSG00000028116	VRK2	protein_coding	297.48	0.388297	0.251244	257.486	0.243313	0.649097	18.2602	1.02449	0.999918	13.2086	-0.0543177	1
ENSG00000028137	TNFRSF1B	protein_coding	2.01943	0.172367	1	3.42559	-1.61385	1	2.37395	2.52277	0.999918	1.32052	-0.0458496	1
ENSG00000028203	VEZT	protein_coding	1405.95	-0.0604977	0.862947	1556.42	0.0349161	0.943856	2501.01	-0.118081	0.999918	2452.44	0.00640829	0.987888
ENSG00000028277	POU2F2	protein_coding	46.8838	-0.829809	1	46.885	-1.04173	1	360.439	-0.0667693	0.999918	624.674	-0.223413	1
ENSG00000028310	BRD9	protein_coding	314.254	-0.196067	0.630575	320.909	-0.154673	0.759099	216.424	-0.00382477	0.999918	230.908	0.0647038	1
ENSG00000028528	SNX1	protein_coding	379.567	0.0150626	0.979178	395.826	0.0391978	0.954233	176.101	-0.0877882	0.999918	196.842	-0.0430919	1
ENSG00000028839	TBPL1	protein_coding	511.323	0.192688	0.570223	699.854	0.224018	0.492792	464.926	-0.0562609	0.999918	635.68	0.047401	0.944298
ENSG00000029153	ARNTL2	protein_coding	251.325	0.151978	0.756045	223.464	0.206427	0.722284	212.463	-0.432956	0.999918	189.88	-0.0340613	1
ENSG00000029363	BCLAF1	protein_coding	3182.96	-0.091692	0.7698	3617.08	0.0685855	0.881711	3880.35	0.0331365	0.999918	4480.5	0.187836	0.199507
ENSG00000029364	SLC39A9	protein_coding	1068.92	-0.0371855	0.928383	1282.83	0.0282504	0.96323	1428.26	-0.0830601	0.999918	1441.26	-0.09786	0.750709
ENSG00000029534	ANK1	protein_coding	18.4388	-0.492566	1	13.325	0.7969	1	164.466	-0.151405	0.999918	103.493	-0.370635	1
ENSG00000029559	IBSP	protein_coding	0.18443	-0.692072	1	0	0	1	0.748023	2.48419	0.999918	1.02733	1.09692	1
ENSG00000029639	TFB1M	protein_coding	107.54	0.353182	1	126.841	0.0736574	0.939168	58.76	0.456713	0.999918	57.3261	-0.0532296	1
ENSG00000029725	RABEP1	protein_coding	1205.5	-0.144302	0.646697	1372.37	-0.0205809	0.973205	2306.14	-0.129245	0.999918	2251.18	0.0187751	0.972024
ENSG00000029993	HMGB3	protein_coding	1586	0.0177099	0.964574	1865.57	-0.0300088	0.952155	1992.82	0.0149633	0.999918	2246.78	0.106038	0.661032
ENSG00000030066	NUP160	protein_coding	1113.92	0.0201931	0.962292	1233.61	0.0234668	0.967552	366.301	-0.0938663	0.999918	455.118	-0.0271624	1
ENSG00000030110	BAK1	protein_coding	88.7383	0.531555	1	98.8985	0.13807	0.891887	30.5218	0.480199	0.999918	32.095	0.0181513	1
ENSG00000030304	MUSK	protein_coding	0.326047	0.203465	1	0.161036	0.936026	1	4.31564	1.496	0.999918	1.58948	0.459436	1
ENSG00000030419	IKZF2	protein_coding	468.966	-0.00803493	0.98891	725.226	0.00985252	0.988072	384.678	0.0821392	0.999918	342.326	0.00214137	1
ENSG00000030582	GRN	protein_coding	215.693	-0.0274878	0.96791	261.582	0.00929076	0.9919	193.72	0.0899232	0.999918	162.183	-0.226569	1
ENSG00000031003	FAM13B	protein_coding	541.967	0.0735685	0.877947	581.391	0.212649	0.57865	917.726	-0.145913	0.999918	856.614	0.087787	0.847612
ENSG00000031081	ARHGAP31	protein_coding	23.8863	-0.320901	1	21.0017	-0.272113	1	5.98774	1.45166	0.999918	5.25083	0.605162	1
ENSG00000031691	CENPQ	protein_coding	243.777	0.474713	0.204069	260.294	0.316296	0.492792	26.9977	0.366729	0.999918	30.588	0.085395	1
ENSG00000031698	SARS	protein_coding	1180.86	0.230764	0.438895	1453.65	0.156888	0.59784	1740.26	0.0603221	0.999918	2401.24	0.0527982	0.885814
ENSG00000031823	RANBP3	protein_coding	385.806	-0.237408	0.497618	418.289	-0.0865117	0.8802	620.847	-0.244993	0.999918	607.137	-0.16757	1
ENSG00000032219	ARID4A	protein_coding	501.079	-0.353696	0.236157	572.779	-0.0170736	0.980957	1222.96	-0.22028	0.999918	1216.84	0.141912	0.633253
ENSG00000032389	EIPR1	protein_coding	193.141	0.218384	1	211.828	0.190578	0.742527	178.1	-0.0147373	0.999918	166.425	-0.43167	1
ENSG00000032444	PNPLA6	protein_coding	116.621	-0.18121	1	132.038	-0.0314735	0.977033	121.72	0.0484804	0.999918	117.297	-0.303529	1
ENSG00000032742	IFT88	protein_coding	411.762	0.0749173	0.874904	456.732	0.179371	0.676681	169.333	0.0344699	0.999918	210.54	0.128134	1
ENSG00000033011	ALG1	protein_coding	94.1353	0.198838	1	123.313	0.303105	0.687905	83.9311	0.208243	0.999918	75.7937	0.227712	1
ENSG00000033030	ZCCHC8	protein_coding	462.46	0.0570041	0.905379	525.118	0.0364922	0.958256	355.122	-0.0244183	0.999918	412.922	-0.126264	1
ENSG00000033050	ABCF2	protein_coding	384.882	0.0530189	0.913558	395.586	0.060364	0.917741	334.678	0.0633841	0.999918	351.417	-0.217534	1
ENSG00000033100	CHPF2	protein_coding	210.248	-0.524218	0.156063	260.851	-0.133854	0.834524	136.09	-0.146249	0.999918	124.65	-0.335338	1
ENSG00000033122	LRRC7	protein_coding	9.95517	-1.33066	1	17.4956	-1.62325	1	309.788	-0.156031	0.999918	307.078	-0.193224	1
ENSG00000033170	FUT8	protein_coding	959.177	0.125647	0.744842	519.446	-0.125594	0.808008	689.192	0.124716	0.999918	385.655	-0.170053	1
ENSG00000033178	UBA6	protein_coding	1463.54	-0.0520726	0.89398	1683.35	0.0732084	0.86565	935.163	-0.135462	0.999918	1060.35	0.0781725	0.848681
ENSG00000033327	GAB2	protein_coding	606.366	-0.459374	0.143471	620.319	-0.329263	0.303855	2443.79	0.273062	0.999918	2811.55	0.180097	0.540713
ENSG00000033627	ATP6V0A1	protein_coding	426.415	-0.268611	0.454941	444.339	-0.1951	0.628622	1977.92	0.0118514	0.999918	1702.41	-0.0743393	0.830734
ENSG00000033800	PIAS1	protein_coding	1076.38	-0.132981	0.687498	1676.38	-0.168336	0.618725	2253.72	-0.0412895	0.999918	2399.92	0.0118181	0.980715
ENSG00000033867	SLC4A7	protein_coding	1752.5	0.0593652	0.888194	2474.18	-0.0374898	0.944707	1944.58	-0.278963	0.999918	2017.4	-0.00906022	0.983582
ENSG00000034053	APBA2	protein_coding	682.888	0.0127347	0.978439	703.034	-0.182289	0.597578	1413.33	-0.197344	0.999918	1401.41	-0.215706	0.341324
ENSG00000034152	MAP2K3	protein_coding	34.7382	0.0919916	1	51.5189	-0.211078	1	27.1399	0.349224	0.999918	20.8752	0.32695	1
ENSG00000034239	EFCAB1	protein_coding	8.60518	0.450048	1	9.40509	0.353096	1	6.40117	-0.224044	0.999918	5.1665	0.294372	1
ENSG00000034510	TMSB10	protein_coding	4012.77	0.129284	0.654837	3759.11	0.0431809	0.909925	9910.27	-0.00433487	0.999918	8950.52	-0.0754261	0.698792
ENSG00000034533	ASTE1	protein_coding	38.8589	0.361013	1	50.3719	-0.147694	1	22.4377	-0.0796798	0.999918	43.1868	-0.0925486	1
ENSG00000034677	RNF19A	protein_coding	433.702	-0.0725841	0.87625	629.039	-0.0106023	0.987652	605.377	-0.0677603	0.999918	722.599	0.0238852	0.974193
ENSG00000034693	PEX3	protein_coding	138.644	0.0526844	1	152.54	0.205934	0.77635	123.568	0.048665	0.999918	138.517	0.28958	1
ENSG00000034713	GABARAPL2	protein_coding	551.469	-0.0720802	0.871917	533.032	0.16657	0.712853	637.339	0.0148354	0.999918	641.806	0.0970547	0.848681
ENSG00000034971	MYOC	protein_coding	0.170731	1.09311	1	0	0	1	0.442152	-2.05718	0.999918	0.60752	1.48655	1
ENSG00000035115	SH3YL1	protein_coding	179.044	-0.129758	1	229.158	-0.193505	0.733304	73.7076	-0.0950013	0.999918	90.8336	-0.134179	1
ENSG00000035141	FAM136A	protein_coding	565.926	0.447189	0.112013	651.976	0.257173	0.404598	301.851	0.124314	0.999918	347.63	0.0916872	1
ENSG00000035403	VCL	protein_coding	963.092	0.32016	0.170521	1003.32	0.374833	0.247514	536.922	0.315942	0.999918	459.514	0.141081	1
ENSG00000035499	DEPDC1B	protein_coding	588.537	0.309853	0.289703	654.347	0.168733	0.654843	38.6953	0.407936	0.999918	54.0937	0.200325	1
ENSG00000035664	DAPK2	protein_coding	12.1513	0.0369353	1	6.29274	-0.450995	1	6.85283	1.19505	0.999918	5.10168	1.5805	1
ENSG00000035681	NSMAF	protein_coding	234.257	0.0225786	0.972197	274.86	-0.00461376	0.997557	219.312	-0.00575179	0.999918	244.804	0.193605	1
ENSG00000035687	ADSS	protein_coding	564.908	0.289875	0.412834	675.076	0.219814	0.524353	299.395	-0.0187917	0.999918	336.939	0.0122803	1
ENSG00000035720	STAP1	protein_coding	0	0	1	0.161036	0.936026	1	1.70169	3.33593	0.999918	1.04169	2.25002	1
ENSG00000035862	TIMP2	protein_coding	586.913	-0.542468	0.0236711	470.556	-0.389384	0.178213	1962.79	-0.120387	0.999918	1929.87	-0.0352402	0.93562
ENSG00000035928	RFC1	protein_coding	1643.99	0.0873234	0.80193	1885.79	0.0225098	0.967582	691.556	-0.00161996	0.999918	741.718	0.0667943	0.9088
ENSG00000036054	TBC1D23	protein_coding	449.435	0.0399832	0.934839	603.255	0.249883	0.429107	380.998	-0.133101	0.999918	400.512	-0.0286673	1
ENSG00000036257	CUL3	protein_coding	972.958	-0.0198322	0.962876	1001.58	0.0791681	0.855791	1040.05	0.0499974	0.999918	1112.67	0.0461158	0.931228
ENSG00000036448	MYOM2	protein_coding	22.3552	0.234011	1	24.5163	0.697701	1	49.8924	0.0568027	0.999918	33.1341	0.435792	1
ENSG00000036473	OTC	protein_coding	0.18443	-0.692072	1	0.974593	-0.964794	1	0.966094	0.378667	0.999918	0.994754	-2.00096	1
ENSG00000036530	CYP46A1	protein_coding	16.5816	-0.163067	1	18.4609	-0.487254	1	31.9164	-0.256164	0.999918	19.0112	0.099389	1
ENSG00000036549	ZZZ3	protein_coding	1109.26	0.0106376	0.980464	1335.76	0.1475	0.647054	1052.55	-0.105145	0.999918	1275.62	-0.01652	0.978411
ENSG00000036565	SLC18A1	protein_coding	7.66835	-1.76492	1	4.22008	0.20909	1	19.9944	-0.585761	0.999918	9.34663	-0.432667	1
ENSG00000036672	USP2	protein_coding	4.03153	-1.46009	1	7.12331	-0.652975	1	8.72336	0.431284	0.999918	3.15865	-0.536764	1
ENSG00000036828	CASR	protein_coding	0.137551	-0.670093	1	0.153789	-0.81843	1	4.34001	1.64577	0.999918	3.02624	1.72751	1
ENSG00000037042	TUBG2	protein_coding	43.955	-0.264065	1	54.6394	-0.456384	1	98.9506	0.134686	0.999918	105.395	-0.250467	1
ENSG00000037241	RPL26L1	protein_coding	128.411	0.493943	1	144.412	0.308448	0.626723	141.24	-0.117359	0.999918	135.65	0.244256	1
ENSG00000037280	FLT4	protein_coding	58.3734	0.118071	1	48.8351	0.0689463	1	7.15414	0.659652	0.999918	5.26559	0.490052	1
ENSG00000037474	NSUN2	protein_coding	318.597	0.0360202	0.949302	307.164	0.194387	0.688938	314.704	0.209517	0.999918	353.73	0.08192	1
ENSG00000037637	FBXO42	protein_coding	435.536	-0.177509	0.658543	482.959	-0.323781	0.309173	526.89	-0.185444	0.999918	495.388	-0.191932	1
ENSG00000037749	MFAP3	protein_coding	505.316	-0.110474	0.798671	549.454	-0.053523	0.926082	619.506	0.0102253	0.999918	554.901	-0.0329386	1
ENSG00000037757	MRI1	protein_coding	196.29	0.112217	1	177.964	-0.0744652	0.924826	154.531	-0.177569	0.999918	188.498	-0.109881	1
ENSG00000037897	METTL1	protein_coding	38.0045	0.266111	1	45.4438	0.20827	1	12.0224	0.384486	0.999918	14.3352	0.737124	1
ENSG00000037965	HOXC8	protein_coding	0.376993	1.48127	1	0	0	1	2.75673	1.05834	0.999918	1.39795	0.840472	1
ENSG00000038002	AGA	protein_coding	143.293	0.292584	1	137.616	-0.023709	0.98196	28.9099	0.145084	0.999918	43.7979	0.341688	1
ENSG00000038210	PI4K2B	protein_coding	123.084	0.0813993	1	142.21	0.166245	0.832992	25.1882	-0.203109	0.999918	37.0613	-0.0993026	1
ENSG00000038219	BOD1L1	protein_coding	1120.42	-0.350994	0.147796	1283.07	-0.294281	0.217625	1591.51	-0.00597617	0.999918	1939.32	0.192172	0.312746
ENSG00000038274	MAT2B	protein_coding	1164.2	0.262095	0.350902	1496.57	0.312858	0.197108	156.323	0.352181	0.999918	220.975	0.0446254	1
ENSG00000038295	TLL1	protein_coding	5.5973	0.202422	1	3.2818	0.610042	1	35.4805	0.623103	0.999918	36.8907	-0.0811173	1
ENSG00000038358	EDC4	protein_coding	302.684	-0.244236	0.524072	243.366	-0.0880925	0.898023	485.624	-0.111632	0.999918	433.226	-0.362606	1
ENSG00000038382	TRIO	protein_coding	1407.29	-0.353383	0.179559	1431.25	-0.1564	0.634915	3778.06	-0.283698	0.999918	3836.69	-0.154653	0.40764
ENSG00000038427	VCAN	protein_coding	6316.64	-0.219054	0.318358	8974.25	-0.22265	0.295776	29232.2	-0.0453844	0.999918	7897.44	0.0607865	0.871747
ENSG00000038532	CLEC16A	protein_coding	208.371	-0.138535	0.817912	266.341	0.0124467	0.988666	505.012	-0.338568	0.999918	475.188	-0.319356	1
ENSG00000038945	MSR1	protein_coding	0	0	1	0.176303	0.95217	1	2.13897	1.77851	0.999918	1.41195	0.655156	1
ENSG00000039068	CDH1	protein_coding	1.64976	-1.43644	1	0.95274	-0.569471	1	7.30184	1.40749	0.999918	4.9473	1.85338	1
ENSG00000039123	SKIV2L2	protein_coding	1330.88	0.223025	0.403257	1562.02	0.25141	0.336665	800.692	-0.083023	0.999918	941.128	0.00687778	0.987888
ENSG00000039139	DNAH5	protein_coding	83.9021	0.0912928	1	59.6106	0.261593	1	76.7621	-0.147644	0.999918	51.3978	0.332849	1
ENSG00000039319	ZFYVE16	protein_coding	1112.78	0.0203694	0.963659	1354.7	0.115267	0.746811	499.246	-0.0450608	0.999918	555.865	0.0592236	1
ENSG00000039523	RIPOR1	protein_coding	94.8396	-0.31319	1	78.5106	-0.366513	1	383.141	0.026719	0.999918	425.222	-0.105253	1
ENSG00000039537	C6	protein_coding	0	0	1	0.153789	-0.81843	1	12.1196	0.461731	0.999918	1.6937	-0.2694	1
ENSG00000039560	RAI14	protein_coding	1563.43	0.288936	0.371882	1107.15	-0.0373678	0.952767	396.951	0.665423	0.999918	475.692	0.311767	1
ENSG00000039600	SOX30	protein_coding	1.09616	2.32974	1	3.10167	-2.1368	1	3.00775	1.89903	0.999918	4.15379	1.65033	1
ENSG00000039650	PNKP	protein_coding	132.016	-0.0672638	1	133.351	0.182596	0.815054	40.6927	-0.018713	0.999918	30.0175	0.198652	1
ENSG00000039987	BEST2	protein_coding	0.321982	-1.47213	1	0.655841	0.627052	1	1.29501	0.0206427	0.999918	0.986215	-1.33918	1
ENSG00000040199	PHLPP2	protein_coding	310.138	-0.236529	0.548325	280.492	-0.0648197	0.924826	346.878	-0.166571	0.999918	316.18	-0.0968244	1
ENSG00000040275	SPDL1	protein_coding	471.852	0.277616	0.401115	527.067	0.282337	0.402024	133.225	0.182786	0.999918	135.964	0.015135	1
ENSG00000040341	STAU2	protein_coding	1017.56	0.0625283	0.88202	1075.42	0.161225	0.680236	1581.21	-0.0461693	0.999918	1425.06	0.11574	0.696083
ENSG00000040487	PQLC2	protein_coding	83.7309	-0.0241828	1	84.8115	0.0512267	1	84.5963	0.0492595	0.999918	73.1486	-0.0825942	1
ENSG00000040531	CTNS	protein_coding	59.6513	0.0960333	1	60.7367	-0.0781839	1	70.3328	0.0770314	0.999918	65.7791	-0.178244	1
ENSG00000040608	RTN4R	protein_coding	64.6004	-0.209955	1	52.1503	0.100817	1	40.8966	0.0422655	0.999918	37.9473	-0.767214	1
ENSG00000040633	PHF23	protein_coding	497.379	0.0986543	0.817912	566.781	0.192607	0.638891	646.596	0.070079	0.999918	609.612	-0.144338	1
ENSG00000040731	CDH10	protein_coding	447.033	-0.0237382	0.963196	508.878	0.0754323	0.899464	366.896	-0.00558707	0.999918	1381.99	-0.190568	0.450072
ENSG00000040933	INPP4A	protein_coding	474.683	-0.258652	0.44238	422.075	-0.139479	0.771304	853.727	-0.223257	0.999918	763.272	0.00235059	0.996376
ENSG00000041353	RAB27B	protein_coding	80.2028	-0.128425	1	66.245	-0.753176	1	375.407	-0.232283	0.999918	853.585	-0.460214	0.0934651
ENSG00000041357	PSMA4	protein_coding	1331.84	0.509789	0.00926829	1515.02	0.422803	0.0613183	827.135	0.108047	0.999918	923.893	0.14364	0.648336
ENSG00000041515	MYO16	protein_coding	109.045	-0.797192	1	132.331	0.170084	0.839496	330.289	-0.189673	0.999918	286.274	-0.02651	1
ENSG00000041802	LSG1	protein_coding	354.237	0.175211	0.666215	359.096	0.150397	0.766326	234.042	0.0014653	0.999918	230.011	0.245519	1
ENSG00000041880	PARP3	protein_coding	22.3228	-0.553855	1	28.7024	-0.69805	1	48.4673	0.201113	0.999918	60.6132	0.0974337	1
ENSG00000041982	TNC	protein_coding	165.546	1.07108	1	107.057	0.89451	0.0755443	44.4494	0.722381	0.999918	27.8977	1.40713	1
ENSG00000041988	THAP3	protein_coding	125.222	0.251198	1	126.063	0.173949	0.827742	79.3391	-0.222456	0.999918	64.1048	-0.310681	1
ENSG00000042062	RIPOR3	protein_coding	4.42183	-0.00171612	1	18.0031	-0.342779	1	2.92316	2.4789	0.999918	2.3158	0.0942363	1
ENSG00000042088	TDP1	protein_coding	402.868	0.125216	0.778272	475.071	0.00750045	0.991964	245.179	-0.0302297	0.999918	303.551	-0.115946	1
ENSG00000042286	AIFM2	protein_coding	7.54116	-0.742691	1	4.11738	0.283984	1	10.7064	-0.00798851	0.999918	7.4778	-0.823889	1
ENSG00000042304	C2orf83	protein_coding	0	0	1	0	0	1	1.81216	1.74303	0.999918	1.29126	0.902352	1
ENSG00000042317	SPATA7	protein_coding	286.407	0.14365	0.762909	494.7	0.276078	0.41096	351.75	0.0522939	0.999918	375.566	0.116445	1
ENSG00000042429	MED17	protein_coding	67.4093	-0.22788	1	68.1035	0.000736544	1	36.5475	-0.0281335	0.999918	50.2888	-0.219267	1
ENSG00000042445	RETSAT	protein_coding	153.227	0.326028	1	196.562	0.0373473	0.967495	59.2793	0.41175	0.999918	57.8344	-0.201987	1
ENSG00000042493	CAPG	protein_coding	31.9159	0.580087	1	46.4258	-0.523751	1	1.37485	1.40938	0.999918	2.10428	0.733323	1
ENSG00000042753	AP2S1	protein_coding	458.976	0.28804	0.417599	400.257	0.297424	0.384575	196.937	0.00769378	0.999918	165.736	-0.0164704	1
ENSG00000042781	USH2A	protein_coding	14.7822	-0.247395	1	80.2776	-0.528285	1	35.2612	0.226638	0.999918	44.9302	-0.265182	1
ENSG00000042813	ZPBP	protein_coding	0	0	1	0	0	1	0.708242	0.312706	0.999918	0.662829	1.89838	1
ENSG00000042832	TG	protein_coding	4.51209	0.762009	1	3.77129	-0.233945	1	8.09376	1.17027	0.999918	5.93679	1.78535	1
ENSG00000042980	ADAM28	protein_coding	11.4457	1.88117	1	2.00856	1.40609	1	10.5901	1.25981	0.999918	3.74174	2.56141	1
ENSG00000043039	BARX2	protein_coding	0.364005	1.88112	1	0	0	1	4.07493	1.49138	0.999918	0.351217	2.28861	1
ENSG00000043093	DCUN1D1	protein_coding	619.672	0.0955445	0.817912	772.985	0.131705	0.759099	546.244	-0.0595442	0.999918	579.724	0.102257	1
ENSG00000043143	JADE2	protein_coding	19.2648	-0.301064	1	56.4019	-0.270314	1	13.2392	0.632538	0.999918	12.1139	-0.0488602	1
ENSG00000043355	ZIC2	protein_coding	254.221	-0.527112	0.132051	61.5187	-0.177101	1	949.348	-0.0975434	0.999918	81.4522	0.491311	1
ENSG00000043462	LCP2	protein_coding	0	0	1	0.513153	0.27529	1	5.32227	-1.04986	0.999918	2.05466	1.30613	1
ENSG00000043514	TRIT1	protein_coding	370.409	0.249677	0.518389	409.377	0.228426	0.593856	213.703	-0.098303	0.999918	264.714	0.045805	1
ENSG00000043591	ADRB1	protein_coding	0	0	1	0.81163	0.876219	1	1.67522	0.221394	0.999918	5.02959	-0.206088	1
ENSG00000044012	GUCA2B	protein_coding	0	0	1	0	0	1	0	0	1	0.119644	-0.26686	1
ENSG00000044090	CUL7	protein_coding	725.776	-0.267251	0.309415	913.636	-0.197116	0.537317	291.707	-0.156599	0.999918	327.954	-0.460408	1
ENSG00000044115	CTNNA1	protein_coding	2475.75	-0.0437935	0.898842	2665.39	0.0638977	0.865044	714.667	-0.14805	0.999918	1286.95	-0.152091	0.921107
ENSG00000044446	PHKA2	protein_coding	240.271	-0.186487	0.68926	213.209	-0.194382	0.731145	77.4409	-0.258421	0.999918	77.4262	-0.290985	1
ENSG00000044459	CNTLN	protein_coding	511.939	-0.126091	0.770191	478.825	0.0225682	0.973205	152.063	-0.184357	0.999918	107.662	0.206126	1
ENSG00000044524	EPHA3	protein_coding	1624.18	-0.287595	0.7698	446.355	-1.0862	7.17021e-06	1450	-0.380557	0.999918	1049.58	-0.0107937	0.983582
ENSG00000044574	HSPA5	protein_coding	516.123	0.489619	0.0678944	663.516	0.514261	0.0497807	276.68	0.0899565	0.999918	323.194	0.0368032	1
ENSG00000046604	DSG2	protein_coding	491.338	0.226051	0.506211	298.241	0.17638	0.770754	29.6557	0.311002	0.999918	28.7507	0.544025	1
ENSG00000046647	GEMIN8	protein_coding	73.4039	0.017789	1	98.16	0.0922731	0.928243	51.1702	-0.718468	0.999918	59.4615	-0.192947	1
ENSG00000046651	OFD1	protein_coding	454.921	-0.00267538	0.996151	523.326	-0.0264967	0.967582	216.409	-0.167118	0.999918	273.54	0.108711	1
ENSG00000046653	GPM6B	protein_coding	1750.83	-0.315561	0.173188	1122.76	-0.154498	0.736622	1330.95	-0.174202	0.999918	976.848	-0.366509	0.0978456
ENSG00000046774	MAGEC2	protein_coding	0	0	1	0	0	1	0.113908	1.25507	0.999918	0.449672	0.981092	1
ENSG00000046889	PREX2	protein_coding	759.337	0.0332373	0.943719	902.735	-0.101001	0.829337	60.2732	0.486611	0.999918	79.0051	0.477659	1
ENSG00000047056	WDR37	protein_coding	232.55	-0.452404	0.25642	240.171	-0.0898398	0.892395	458.705	-0.107167	0.999918	425.768	0.0386309	1
ENSG00000047188	YTHDC2	protein_coding	541.756	-0.0949104	0.818382	553.848	-0.106442	0.821376	592.076	0.0651968	0.999918	551.017	0.336815	1
ENSG00000047230	CTPS2	protein_coding	598.865	0.0497367	0.912768	785.95	-0.0472656	0.938919	357.236	0.123332	0.999918	540.39	0.0457998	1
ENSG00000047249	ATP6V1H	protein_coding	544.418	-0.132625	0.729201	569.947	0.0270339	0.966954	417.351	0.0520121	0.999918	475.37	0.0210579	1
ENSG00000047315	POLR2B	protein_coding	2172.33	0.0775934	0.819899	2554.39	0.163289	0.628074	2182.33	-0.137768	0.999918	2438.14	-0.000111918	0.999903
ENSG00000047346	FAM214A	protein_coding	215.753	-0.361067	0.414165	194.26	-0.159487	0.806067	372.751	-0.243513	0.999918	314.591	-0.0603409	1
ENSG00000047365	ARAP2	protein_coding	29.8549	0.184484	1	17.7637	0.281657	1	14.7531	0.72527	0.999918	44.9968	-0.062818	1
ENSG00000047410	TPR	protein_coding	4305.92	-0.130098	0.669672	4947.34	-0.10273	0.746811	2516.64	0.0864639	0.999918	3159.01	0.272431	0.0604663
ENSG00000047457	CP	protein_coding	1.34091	-0.348059	1	1.34397	0.634686	1	54.3402	0.363717	0.999918	1.29066	-1.00914	1
ENSG00000047578	KIAA0556	protein_coding	269.028	-0.160189	0.748814	267.147	-0.0929522	0.88966	195.071	-0.142636	0.999918	192.678	-0.192066	1
ENSG00000047579	DTNBP1	protein_coding	50.6285	0.146931	1	48.7002	0.238776	1	63.8488	-0.0793894	0.999918	49.9373	-0.643144	1
ENSG00000047597	XK	protein_coding	36.0968	-0.174646	1	49.0664	-0.140342	1	41.8789	-0.11221	0.999918	44.6939	0.107955	1
ENSG00000047617	ANO2	protein_coding	79.1931	0.140921	1	42.3437	0.0466903	1	29.0034	0.759885	0.999918	23.4491	0.335379	1
ENSG00000047621	C12orf4	protein_coding	253.269	-0.0292508	0.963659	285.317	0.229249	0.654353	362.421	-0.0149653	0.999918	348.361	0.0613117	1
ENSG00000047634	SCML1	protein_coding	306.316	-0.198027	0.663057	129.67	-0.296315	0.661683	33.3491	-0.225093	0.999918	24.9232	0.958983	1
ENSG00000047644	WWC3	protein_coding	226.451	0.047466	0.936263	181.153	0.0793598	0.923681	148.254	-0.407869	0.999918	116.259	-0.287836	1
ENSG00000047648	ARHGAP6	protein_coding	20.7684	0.328296	1	17.4064	-0.112121	1	8.99342	0.225099	0.999918	6.88026	0.0187255	1
ENSG00000047662	FAM184B	protein_coding	1.7169	1.24948	1	2.62463	0.000363802	1	9.29159	0.0274697	0.999918	9.37549	0.0572985	1
ENSG00000047849	MAP4	protein_coding	1252.23	-0.225675	0.369506	791.763	-0.114308	0.774795	2755.13	-0.16438	0.999918	2108.56	-0.135028	0.619889
ENSG00000047932	GOPC	protein_coding	625.495	-0.200285	0.56361	898.936	-0.153677	0.660134	672.129	-0.091257	0.999918	817.914	0.017386	0.979811
ENSG00000047936	ROS1	protein_coding	0	0	1	0	0	1	4.66609	3.46855	0.999918	4.9273	1.18313	1
ENSG00000048028	USP28	protein_coding	507.433	0.168388	0.648196	538.795	0.0662247	0.897477	78.8457	-0.0129095	0.999918	84.736	-0.0503193	1
ENSG00000048052	HDAC9	protein_coding	980.751	-0.178374	0.639456	1662.79	-0.231709	0.381702	607.822	-0.453465	0.999918	3500.61	-0.152663	0.447291
ENSG00000048140	TSPAN17	protein_coding	192.007	-0.123024	1	309.558	0.0463146	0.951413	189.513	-0.29878	0.999918	177.274	-0.310971	1
ENSG00000048162	NOP16	protein_coding	73.1174	0.419895	1	76.8998	0.278311	1	39.068	-0.0238559	0.999918	35.9687	-0.0105308	1
ENSG00000048342	CC2D2A	protein_coding	361.505	-0.238795	0.511349	420.258	-0.0674125	0.903299	232.549	0.136768	0.999918	434.057	0.0808543	1
ENSG00000048392	RRM2B	protein_coding	476.445	0.479336	0.250861	853.249	0.393967	0.262652	245.155	0.142937	0.999918	352.372	0.286611	1
ENSG00000048405	ZNF800	protein_coding	385.165	-0.120718	0.791852	501.731	0.0982475	0.852834	439.595	-0.21184	0.999918	494.453	0.0630309	1
ENSG00000048462	TNFRSF17	protein_coding	0	0	1	0.161036	0.936026	1	0.95481	2.67704	0.999918	0.146598	-0.275625	1
ENSG00000048471	SNX29	protein_coding	239.913	-0.459537	0.205088	254.644	-0.185985	0.741478	496.962	-0.180279	0.999918	498.915	-0.210833	1
ENSG00000048540	LMO3	protein_coding	724.636	0.00417497	0.9932	1711.17	-0.00832414	0.988666	270.857	-0.0841711	0.999918	785.784	0.22432	0.512686
ENSG00000048544	MRPS10	protein_coding	231.698	0.173509	0.729881	228.238	0.298837	0.503477	250.942	0.0699483	0.999918	244.502	0.162685	1
ENSG00000048545	GUCA1A	protein_coding	14.7252	0.437875	1	12.4892	-0.683414	1	5.24374	0.814326	0.999918	8.79506	-0.0318793	1
ENSG00000048649	RSF1	protein_coding	1395.05	-0.00660657	0.987987	1682.98	0.0393073	0.929467	1590.26	-0.0781285	0.999918	1804.89	0.222185	0.272171
ENSG00000048707	VPS13D	protein_coding	756.689	-0.353543	0.145369	731.664	-0.253554	0.375338	780.727	-0.116327	0.999918	712.921	-0.0784341	0.871747
ENSG00000048740	CELF2	protein_coding	1277.11	-0.315838	0.154147	1006.05	-0.271822	0.287581	1374.31	-0.182298	0.999918	1289.61	0.0911198	0.7967
ENSG00000048828	FAM120A	protein_coding	449.671	-0.0378513	0.936208	440.444	-0.0978378	0.852834	410.55	0.124742	0.999918	463.84	-0.0682738	1
ENSG00000048991	R3HDM1	protein_coding	401.362	-0.250384	0.466685	429.041	-0.136902	0.768576	1113.58	0.111563	0.999918	1094.2	-0.137354	0.66979
ENSG00000049089	COL9A2	protein_coding	52.2268	0.363909	1	74.2095	-0.530938	1	27.5586	0.186643	0.999918	30.441	-0.788703	1
ENSG00000049130	KITLG	protein_coding	213.902	0.267506	0.556904	150.558	0.562496	0.306047	30.5508	-0.20183	0.999918	51.791	0.00970172	1
ENSG00000049167	ERCC8	protein_coding	275.472	0.0722509	0.893111	309.684	0.0667421	0.92333	168.768	0.0915031	0.999918	160.198	0.233032	1
ENSG00000049192	ADAMTS6	protein_coding	340.456	-0.146829	0.748814	403.061	0.071829	0.903138	89.1809	-0.514652	0.999918	84.8748	-0.0428981	1
ENSG00000049239	H6PD	protein_coding	417.26	-0.124718	0.779434	414.545	-0.303139	0.407693	144.702	0.0871103	0.999918	173.889	-0.106147	1
ENSG00000049245	VAMP3	protein_coding	325.158	0.312011	0.395445	526.981	0.310081	0.31519	220.95	0.019364	0.999918	323.824	0.180381	1
ENSG00000049246	PER3	protein_coding	76.8475	-0.00238025	1	83.5145	-0.204881	1	73.2925	-0.0280919	0.999918	54.8532	-0.179188	1
ENSG00000049247	UTS2	protein_coding	0.18443	-0.692072	1	0	0	1	31.075	0.403379	0.999918	22.0762	1.65692	1
ENSG00000049249	TNFRSF9	protein_coding	6.07676	0.368769	1	3.42505	0.883006	1	7.21744	1.79523	0.999918	4.70485	1.87467	1
ENSG00000049283	EPN3	protein_coding	2.85722	0.802887	1	2.28265	-1.02704	1	8.20371	0.889917	0.999918	7.22213	0.25069	1
ENSG00000049323	LTBP1	protein_coding	769.889	0.208868	0.565877	1121.45	0.0118364	0.98312	79.8805	0.769724	0.999918	82.6851	0.605421	1
ENSG00000049449	RCN1	protein_coding	1388.66	0.158043	0.63786	1289.89	0.115307	0.743894	343.569	0.229956	0.999918	169.245	-0.00106085	1
ENSG00000049540	ELN	protein_coding	50.7497	-0.43797	1	28.5465	-0.926217	1	9.57463	0.0925839	0.999918	5.79888	0.229449	1
ENSG00000049541	RFC2	protein_coding	368.059	0.253167	0.524072	341.39	0.181222	0.701001	130.015	-0.0504673	0.999918	142.378	0.2216	1
ENSG00000049618	ARID1B	protein_coding	480.025	-0.0664593	0.893111	532.93	-0.238177	0.502435	968.414	-0.00713777	0.999918	869.346	-0.166117	0.581971
ENSG00000049656	CLPTM1L	protein_coding	388.245	0.227607	0.536873	408.928	0.124506	0.824989	285.789	-0.1705	0.999918	276.278	-0.126624	1
ENSG00000049759	NEDD4L	protein_coding	942.964	-0.380829	0.0911809	1229.1	-0.44108	0.0613183	3874.84	-0.179944	0.999918	5199.01	-0.0248877	0.94795
ENSG00000049768	FOXP3	protein_coding	4.78527	-0.811095	1	2.88952	1.09558	1	9.627	-0.171512	0.999918	9.43469	0.433716	1
ENSG00000049769	PPP1R3F	protein_coding	83.1714	-0.0478292	1	74.1783	-0.117877	1	118.534	-0.173051	0.999918	106.609	0.04542	1
ENSG00000049860	HEXB	protein_coding	245.633	0.443926	0.238215	292.511	0.160658	0.790118	77.7119	-0.0263366	0.999918	55.5456	-0.148973	1
ENSG00000049883	PTCD2	protein_coding	316.782	0.126738	0.793712	348.315	-0.0593103	0.923773	115.203	-0.241185	0.999918	132.129	-0.106712	1
ENSG00000050030	NEXMIF	protein_coding	254.082	-0.834844	0.00559734	234.726	-0.658551	0.0343105	1826.83	-0.225694	0.999918	1498.34	-0.0901967	0.772826
ENSG00000050130	JKAMP	protein_coding	546.276	0.0806315	0.850126	736.889	0.182307	0.603926	485.82	0.0115668	0.999918	630.39	-0.0403875	1
ENSG00000050165	DKK3	protein_coding	200.165	-0.559071	0.17632	174.165	-0.48904	0.285766	390.044	-0.252896	0.999918	389.347	-0.23237	1
ENSG00000050327	ARHGEF5	protein_coding	0.548436	1.08183	1	0.170209	0.952709	1	0.860785	2.01057	0.999918	0.94323	2.67488	1
ENSG00000050344	NFE2L3	protein_coding	38.9518	0.80698	1	17.9184	0.119599	1	33.4442	-0.042749	0.999918	23.4112	0.0492859	1
ENSG00000050393	MCUR1	protein_coding	345.306	0.152244	0.725989	383.99	0.17159	0.731145	361.5	-0.0199824	0.999918	409.265	0.0372131	1
ENSG00000050405	LIMA1	protein_coding	261.464	0.114473	0.828179	332.914	0.389832	0.333889	107.931	0.194889	0.999918	136.979	-0.000275495	1
ENSG00000050426	LETMD1	protein_coding	363.491	0.0108541	0.985239	478.305	-0.118264	0.836066	166.132	-0.204878	0.999918	144.063	-0.121566	1
ENSG00000050438	SLC4A8	protein_coding	881.222	-0.695856	0.010533	1002.29	-0.477723	0.0411007	2332.92	-0.2198	0.999918	2145.26	-0.0740829	0.855198
ENSG00000050555	LAMC3	protein_coding	1.9079	-1.89077	1	0.519246	1.16368	1	3.35217	-0.660898	0.999918	4.7397	2.75006	1
ENSG00000050628	PTGER3	protein_coding	144.549	-1.27468	1	4.61418	-0.531867	1	268.703	0.322402	0.999918	39.5691	0.205598	1
ENSG00000050730	TNIP3	protein_coding	1.04593	0.204516	1	0.161036	0.936026	1	23.545	-1.15643	0.999918	3.16889	1.10641	1
ENSG00000050748	MAPK9	protein_coding	288.125	-0.0665437	0.900009	299.094	-0.0732565	0.907834	627.238	-0.0688739	0.999918	562.401	-0.090548	1
ENSG00000050767	COL23A1	protein_coding	1.74217	2.08892	1	2.51079	0.464542	1	2.13947	2.01065	0.999918	1.01031	0.434682	1
ENSG00000050820	BCAR1	protein_coding	232.742	-0.0242042	0.969706	189.354	-0.227396	0.691363	497.357	-0.091114	0.999918	383.393	-0.188637	1
ENSG00000051009	FAM160A2	protein_coding	263.209	-0.354282	0.353046	245.642	-0.203729	0.699788	155.984	-0.205268	0.999918	132.185	-0.348522	1
ENSG00000051108	HERPUD1	protein_coding	147.1	-0.107755	1	159.19	-0.012864	0.990041	256.306	-0.0486984	0.999918	301.423	-0.0720089	1
ENSG00000051128	HOMER3	protein_coding	142.025	0.502265	1	146.271	0.19364	0.779657	115.798	-0.0685362	0.999918	128.908	-0.106168	1
ENSG00000051180	RAD51	protein_coding	158.125	0.28052	1	122.058	0.00121817	0.999752	4.88453	0.121647	0.999918	5.57083	1.0237	1
ENSG00000051341	POLQ	protein_coding	537.072	-0.0894485	0.837767	474.436	-0.152252	0.741398	28.3604	0.906685	0.999918	34.4314	-0.06501	1
ENSG00000051382	PIK3CB	protein_coding	92.7348	0.106647	1	32.0936	-0.158165	1	97.2228	0.222416	0.999918	42.0037	0.252955	1
ENSG00000051523	CYBA	protein_coding	124.829	0.419945	1	125.53	0.214589	0.769029	6.60182	1.40842	0.999918	5.45798	-0.0548581	1
ENSG00000051596	THOC3	protein_coding	111.743	0.348782	1	122.187	0.302602	0.645323	17.2499	0.334319	0.999918	12.6971	0.204447	1
ENSG00000051620	HEBP2	protein_coding	353.221	0.305062	0.392749	311.553	0.194147	0.686871	113.051	0.375651	0.999918	200.816	0.232625	1
ENSG00000051825	MPHOSPH9	protein_coding	815.119	0.0589238	0.886224	873.268	0.0368399	0.943123	547.798	-0.0717106	0.999918	536.223	0.0820348	1
ENSG00000052126	PLEKHA5	protein_coding	1260.59	-0.0969771	0.77799	1261.68	0.0250076	0.963645	1259.76	-0.0273995	0.999918	1512.22	-0.135435	0.704862
ENSG00000052344	PRSS8	protein_coding	1.41717	-2.28348	1	0.170209	0.952709	1	1.50822	0.0295093	0.999918	2.08345	0.935963	1
ENSG00000052723	SIKE1	protein_coding	891.803	0.00410906	0.993688	973.713	0.111707	0.773491	920.561	0.0567245	0.999918	952.636	0.0925977	0.835421
ENSG00000052749	RRP12	protein_coding	201.131	0.057598	0.927294	217.206	0.00549231	0.996254	95.2904	-0.120373	0.999918	80.0165	0.00353309	1
ENSG00000052795	FNIP2	protein_coding	586.954	-0.3787	0.155625	563.452	-0.420565	0.122226	1583.99	-0.0166636	0.999918	1219.64	-0.128032	0.670785
ENSG00000052802	MSMO1	protein_coding	1552.31	0.18589	0.466999	1220	0.102208	0.79416	1392.13	-0.017994	0.999918	1097.67	-0.0493698	0.931228
ENSG00000052841	TTC17	protein_coding	1193.06	-0.0912503	0.783026	1534.21	-0.0363343	0.938387	1046.1	-0.105892	0.999918	1066.44	-0.0206062	0.974263
ENSG00000052850	ALX4	protein_coding	0.728089	0.752291	1	0.507548	2.5048	1	1.71315	0.852616	0.999918	2.04585	1.71301	1
ENSG00000053108	FSTL4	protein_coding	3.91573	-0.302823	1	4.37103	0.607083	1	58.346	-0.382543	0.999918	12.408	0.674459	1
ENSG00000053254	FOXN3	protein_coding	398.161	-0.0121184	0.983124	551.476	-0.135362	0.74877	643.447	-0.139422	0.999918	555.872	-0.241917	1
ENSG00000053328	METTL24	protein_coding	9.28841	0.435566	1	4.72035	-0.252645	1	0.117265	-0.52074	0.999918	1.37325	-2.47912	1
ENSG00000053371	AKR7A2	protein_coding	430.69	0.399056	0.19097	387.947	0.387217	0.208412	92.8853	0.379498	0.999918	79.1432	-0.37743	1
ENSG00000053372	MRTO4	protein_coding	337.037	0.425878	0.17245	258.433	0.218876	0.659087	146.107	-0.0098173	0.999918	141.795	-0.253094	1
ENSG00000053438	NNAT	protein_coding	4708.76	-0.839066	0.510816	10199	-0.184404	0.621369	10766.1	-0.0803537	0.999918	15458.6	-0.0957102	0.733107
ENSG00000053501	USE1	protein_coding	54.775	0.145248	1	62.943	0.103104	1	76.0319	-0.0357703	0.999918	98.4969	-0.0512218	1
ENSG00000053524	MCF2L2	protein_coding	50.3386	-0.272151	1	58.5741	-0.227591	1	228.858	-0.105599	0.999918	199.806	-0.233366	1
ENSG00000053702	NRIP2	protein_coding	0.71439	1.48266	1	0.815126	1.37841	1	1.57455	0.689607	0.999918	2.32463	1.79159	1
ENSG00000053747	LAMA3	protein_coding	19.4926	-0.340011	1	10.6604	0.32028	1	36.7419	-0.244626	0.999918	9.04053	1.54548	1
ENSG00000053770	AP5M1	protein_coding	885.714	-0.0248931	0.956784	1056.16	0.119958	0.781363	960.622	0.0303052	0.999918	1137.98	0.0337481	0.94794
ENSG00000053900	ANAPC4	protein_coding	348.142	0.119262	0.800445	385.675	0.0480612	0.941535	129.94	-0.0649193	0.999918	172.486	0.138064	1
ENSG00000053918	KCNQ1	protein_coding	1.45189	-1.44651	1	3.75414	-0.803782	1	1.83531	-2.32446	0.999918	1.88685	-0.802415	1
ENSG00000054116	TRAPPC3	protein_coding	276.364	0.39044	0.274954	339.492	0.281073	0.454181	289.471	-0.436914	0.999918	283.342	-0.0817673	1
ENSG00000054118	THRAP3	protein_coding	2126.8	-0.00121637	0.996626	2208.36	0.00462984	0.995209	1989.32	-0.0558647	0.999918	2277.32	-0.108531	0.647279
ENSG00000054148	PHPT1	protein_coding	647.4	0.432919	0.162395	654.589	0.310849	0.279843	275.553	0.0932583	0.999918	221.573	-0.167108	1
ENSG00000054179	ENTPD2	protein_coding	0	0	1	0	0	1	0.940561	1.59327	0.999918	1.21353	1.4854	1
ENSG00000054219	LY75	protein_coding	0.333657	0.194002	1	0.497467	0.916165	1	1.15837	-0.548724	0.999918	0.467952	-0.212733	1
ENSG00000054267	ARID4B	protein_coding	957.701	-0.294551	0.238159	1000.19	-0.0168127	0.979086	1281.65	-0.114777	0.999918	1468.06	0.127897	0.63808
ENSG00000054277	OPN3	protein_coding	80.3388	0.506312	1	83.76	0.23125	1	25.2804	-0.00282528	0.999918	41.2049	-0.616137	1
ENSG00000054282	SDCCAG8	protein_coding	182.413	-0.0412557	1	252.77	-0.0054915	0.995817	407.997	0.00179572	0.999918	512.696	0.0133122	1
ENSG00000054356	PTPRN	protein_coding	53.1459	-1.1953	1	87.7095	-0.757401	1	804.402	-0.051229	0.999918	783.269	-0.327208	0.180133
ENSG00000054392	HHAT	protein_coding	204.578	0.0404916	0.950381	401.529	0.0169616	0.981545	54.3877	0.327248	0.999918	73.0145	0.207301	1
ENSG00000054523	KIF1B	protein_coding	2633.11	-0.331083	0.142986	3303.44	-0.173832	0.484367	4615.34	-0.0695048	0.999918	4555.77	-0.0888259	0.707138
ENSG00000054598	FOXC1	protein_coding	7.31015	0.758109	1	1.63026	1.59669	1	8.32002	2.83735	0.999918	3.614	0.713731	1
ENSG00000054611	TBC1D22A	protein_coding	116.383	0.0369839	1	130.063	-0.165225	0.836066	122.778	0.111428	0.999918	140.823	0.0710244	1
ENSG00000054654	SYNE2	protein_coding	14544	-0.476954	0.0039527	8324	-0.256508	0.200373	3721.53	-0.059239	0.999918	4440.44	0.0285403	0.94034
ENSG00000054690	PLEKHH1	protein_coding	182.25	-0.309906	1	161.792	-0.359799	0.527936	231.669	0.0600497	0.999918	301.892	-0.281108	1
ENSG00000054793	ATP9A	protein_coding	921.14	-0.497335	0.0286417	753.446	-0.417563	0.107684	3623.83	-0.130868	0.999918	2442.37	-0.186756	0.341108
ENSG00000054796	SPO11	protein_coding	0	0	1	0	0	1	1.7344	1.07252	0.999918	1.60796	-1.0057	1
ENSG00000054803	CBLN4	protein_coding	0	0	1	0.161036	0.936026	1	1.22054	-0.213764	0.999918	0.781208	2.90043	1
ENSG00000054938	CHRDL2	protein_coding	0	0	1	0.467706	-1.97549	1	2.62034	-0.261156	0.999918	1.96523	3.31204	1
ENSG00000054965	FAM168A	protein_coding	1173.05	-0.658772	0.00142993	1016.35	-0.404222	0.0844613	2617.33	-0.199286	0.999918	2013.82	-0.215397	0.238423
ENSG00000054967	RELT	protein_coding	105.797	0.287535	1	88.6807	0.0248736	1	56.1228	-0.0934603	0.999918	41.7629	0.186554	1
ENSG00000054983	GALC	protein_coding	531.945	-0.0408327	0.930818	751.485	-0.0830506	0.856626	618.275	-0.0517197	0.999918	621.313	0.124365	1
ENSG00000055044	NOP58	protein_coding	882.791	0.287246	0.240765	950.528	0.311574	0.335105	581.457	0.036076	0.999918	718.893	0.240284	0.405336
ENSG00000055070	SZRD1	protein_coding	803.085	0.162137	0.62715	757.813	0.0695947	0.885109	589.177	0.0785049	0.999918	571.293	-0.358154	1
ENSG00000055118	KCNH2	protein_coding	112.406	-0.638001	1	169.262	-0.549157	0.216559	282.729	-0.17148	0.999918	303.579	-0.387988	1
ENSG00000055130	CUL1	protein_coding	959.442	0.0326314	0.93404	956.912	0.0949424	0.837399	859.438	-0.0642606	0.999918	817.725	-0.0263952	0.969282
ENSG00000055147	FAM114A2	protein_coding	398.556	0.204917	0.577056	437.343	0.171788	0.703187	305.689	-0.053649	0.999918	379.039	-0.075864	1
ENSG00000055163	CYFIP2	protein_coding	1492.79	-0.304137	0.163953	1310.41	-0.109266	0.777277	2407.68	-0.132786	0.999918	2161.05	-0.149522	0.486348
ENSG00000055208	TAB2	protein_coding	637.406	0.0303615	0.948687	504.655	0.085653	0.878775	1032.6	0.049129	0.999918	1075.42	0.184134	0.467861
ENSG00000055211	GINM1	protein_coding	187.516	0.112954	1	207.26	-0.0176703	0.985882	169.708	0.0564635	0.999918	183.58	-0.0642719	1
ENSG00000055332	EIF2AK2	protein_coding	745.734	-0.172626	0.586115	687.462	-0.170524	0.642998	356.426	0.0584782	0.999918	528.994	-0.047959	1
ENSG00000055483	USP36	protein_coding	180.303	-0.144082	1	191.404	-0.0930883	0.899464	140.11	-0.129422	0.999918	141.483	-0.0374074	1
ENSG00000055609	KMT2C	protein_coding	1680.77	-0.471068	0.0165049	1755.29	-0.23275	0.386953	3010.47	-0.12474	0.999918	3309.62	0.0291101	0.94034
ENSG00000055732	MCOLN3	protein_coding	2.40157	-0.57412	1	3.54302	0.793844	1	1.81466	0.928797	0.999918	2.57588	1.89407	1
ENSG00000055813	CCDC85A	protein_coding	18.1969	-1.98997	1	3.46732	-1.05067	1	222.611	-0.210773	0.999918	39.215	0.0581942	1
ENSG00000055917	PUM2	protein_coding	1657.09	0.13295	0.636367	1866.87	0.0579487	0.892395	1074.7	-0.03162	0.999918	1275.46	0.13246	0.662782
ENSG00000055950	MRPL43	protein_coding	295.12	0.274616	0.469081	310.663	0.00087596	0.999752	220.627	0.132574	0.999918	215.119	-0.129713	1
ENSG00000055955	ITIH4	protein_coding	0.471208	-0.781088	1	0.497467	0.916165	1	0.598052	-0.981793	0.999918	0.358932	-0.788288	1
ENSG00000055957	ITIH1	protein_coding	0.535449	0.391958	1	0.172734	-0.835596	1	0.825507	-0.828267	0.999918	2.11493	0.61557	1
ENSG00000056050	HPF1	protein_coding	429.705	0.330348	0.278991	457.469	0.305525	0.394394	218.192	0.0542505	0.999918	222.456	0.280543	1
ENSG00000056097	ZFR	protein_coding	2239.59	0.0572464	0.87625	2770.23	0.078464	0.864848	3780.56	-0.0645873	0.999918	4023.41	-0.00258886	0.992032
ENSG00000056277	ZNF280C	protein_coding	528.842	0.143636	0.699912	603.93	0.0747922	0.889362	460.206	0.0132775	0.999918	545.631	0.148308	1
ENSG00000056291	NPFFR2	protein_coding	0.492713	-0.860359	1	1.64807	1.77614	1	3.6258	-1.01485	0.999918	12.1401	0.631251	1
ENSG00000056487	PHF21B	protein_coding	404.205	-0.40547	0.285398	337.058	-0.437893	0.241399	963.541	-0.0203001	0.999918	1011.98	-0.109177	0.743241
ENSG00000056558	TRAF1	protein_coding	31.735	-0.0681471	1	38.6164	-0.672407	1	8.47318	0.395728	0.999918	14.5532	0.133428	1
ENSG00000056586	RC3H2	protein_coding	1779.02	-0.220285	0.393682	2185.22	-0.107213	0.757387	1848.18	-0.121055	0.999918	1940.17	-0.0367207	0.935388
ENSG00000056736	IL17RB	protein_coding	13.5804	1.05488	1	30.2268	0.331946	1	2.09334	0.548858	0.999918	3.71059	2.66813	1
ENSG00000056972	TRAF3IP2	protein_coding	16.984	0.0555711	1	16.3412	0.0033831	1	15.3636	0.647665	0.999918	12.6535	-0.0146609	1
ENSG00000056998	GYG2	protein_coding	219.218	0.0040947	0.995264	206.563	-0.000385167	0.999966	100.43	0.0466892	0.999918	105.002	0.159784	1
ENSG00000057019	DCBLD2	protein_coding	2983.01	-0.124547	0.660414	2579.77	0.0256097	0.958594	2080.73	-0.185629	0.999918	1475.39	-0.0240314	0.966593
ENSG00000057149	SERPINB3	protein_coding	0.188496	1.07965	1	0	0	1	0.986042	0.878098	0.999918	1.1288	0.873849	1
ENSG00000057252	SOAT1	protein_coding	474.282	0.247985	0.479411	586.08	0.109616	0.819785	167.011	0.100637	0.999918	163.921	0.217348	1
ENSG00000057294	PKP2	protein_coding	108.447	0.368338	1	98.5938	0.419188	0.506956	83.2391	-0.550103	0.999918	53.2012	0.0811787	1
ENSG00000057468	MSH4	protein_coding	3.68455	-0.655487	1	6.39055	1.19339	1	8.62278	0.217186	0.999918	6.75421	-0.0513163	1
ENSG00000057593	F7	protein_coding	2.41174	-1.46445	1	2.12871	-1.30405	1	3.26446	1.37705	0.999918	1.67528	-0.99842	1
ENSG00000057608	GDI2	protein_coding	4814.68	0.226581	0.304308	5291.73	0.250695	0.281448	3039.78	-0.0146315	0.999918	3292.08	0.0200567	0.963449
ENSG00000057657	PRDM1	protein_coding	8.11796	1.6733	1	10.0508	1.02238	1	5.72042	2.26898	0.999918	2.96913	-0.731315	1
ENSG00000057663	ATG5	protein_coding	371.105	0.234749	0.519731	466.339	0.298758	0.37423	215.685	-0.00746205	0.999918	229.953	-0.0175626	1
ENSG00000057704	TMCC3	protein_coding	65.1563	0.211298	1	17.3825	-0.155981	1	98.6631	0.823834	0.999918	41.8368	-0.385524	1
ENSG00000057757	PITHD1	protein_coding	326.966	0.126587	0.780838	314.213	-0.013737	0.986766	647.423	-0.00566407	0.999918	568.25	-0.0306638	1
ENSG00000057935	MTA3	protein_coding	540.003	0.132381	0.736477	643.612	-0.0286906	0.964458	374.966	0.261044	0.999918	326.426	-0.0980923	1
ENSG00000058056	USP13	protein_coding	342.964	-0.0482869	0.927294	356.497	-0.0516078	0.938919	167.916	0.341124	0.999918	151.837	0.0263153	1
ENSG00000058063	ATP11B	protein_coding	876.888	-0.113599	0.769455	1062.2	0.00776625	0.990041	466.951	-0.0994363	0.999918	591.568	-0.0261494	1
ENSG00000058085	LAMC2	protein_coding	5.34849	0.830316	1	3.59352	-1.16742	1	13.1753	2.36546	0.999918	4.52573	0.709412	1
ENSG00000058091	CDK14	protein_coding	882.763	-0.104499	0.760082	703.884	-0.169783	0.641419	709.53	0.190858	0.999918	564.059	0.0548108	1
ENSG00000058262	SEC61A1	protein_coding	1066.09	-0.0359643	0.927294	1199.86	-0.00284961	0.997865	1056.96	-0.169369	0.999918	1006.74	-0.17776	0.505398
ENSG00000058272	PPP1R12A	protein_coding	1284.11	-0.158497	0.620265	1672.06	-0.0506623	0.908783	1649.89	-0.114818	0.999918	1862.45	0.054571	0.881972
ENSG00000058335	RASGRF1	protein_coding	1.28616	0.314975	1	0.160128	-0.818939	1	122.514	-0.490989	0.999918	29.4456	-0.638105	1
ENSG00000058404	CAMK2B	protein_coding	23.292	-0.939436	1	13.3323	-0.108963	1	526.266	-0.0690981	0.999918	317.692	-0.273254	1
ENSG00000058453	CROCC	protein_coding	504.415	-0.265646	0.438295	482.694	-0.025151	0.973731	111.344	-0.268516	0.999918	137.264	-0.293007	1
ENSG00000058600	POLR3E	protein_coding	353.767	0.186521	0.649879	430.114	0.0539027	0.930303	169.684	-0.106045	0.999918	172.514	-0.210029	1
ENSG00000058668	ATP2B4	protein_coding	814.612	-1.07055	1.04623e-05	936.772	-0.365102	0.167506	214.915	-0.374958	0.999918	139.701	-0.262411	1
ENSG00000058673	ZC3H11A	protein_coding	0	0	1	0.170209	0.952709	1	0	0	1	0.146598	-0.275625	1
ENSG00000058729	RIOK2	protein_coding	478.864	0.245736	0.47761	562.761	0.29338	0.349287	276.868	0.0159375	0.999918	385.917	0.200219	1
ENSG00000058799	YIPF1	protein_coding	220.785	0.277348	0.55307	285.288	0.220613	0.662593	277.685	-0.145787	0.999918	301.282	0.115851	1
ENSG00000058804	NDC1	protein_coding	1284.24	0.194643	0.528006	1389.19	0.0602846	0.898023	275.474	0.267462	0.999918	277.632	0.105862	1
ENSG00000058866	DGKG	protein_coding	0.771881	1.04722	1	3.25365	-0.81435	1	2.33759	0.372365	0.999918	3.03757	2.38351	1
ENSG00000059122	FLYWCH1	protein_coding	178.509	-0.0346761	1	167.609	0.00776232	0.995428	165.554	-0.224815	0.999918	141.475	-0.410007	1
ENSG00000059145	UNKL	protein_coding	147.558	-0.265837	1	146.848	-0.172483	0.819327	108.342	0.379259	0.999918	132.344	-0.0510472	1
ENSG00000059377	TBXAS1	protein_coding	21.0888	-0.0105977	1	13.2531	-0.813013	1	6.9865	0.567593	0.999918	7.663	0.156541	1
ENSG00000059378	PARP12	protein_coding	8.29984	-0.0233336	1	13.1834	-0.134311	1	3.04215	0.790557	0.999918	3.9073	0.68575	1
ENSG00000059573	ALDH18A1	protein_coding	1058.12	0.115832	0.756045	1070.55	-0.010359	0.986609	437.294	0.240038	0.999918	386.601	-0.146354	1
ENSG00000059588	TARBP1	protein_coding	433.646	-0.105943	0.806582	369.646	-0.177926	0.731813	193.251	-0.0998234	0.999918	146.852	0.099907	1
ENSG00000059691	GATB	protein_coding	183.906	0.224607	1	243.159	0.198312	0.729766	107.521	0.0235489	0.999918	123.982	-0.146117	1
ENSG00000059728	MXD1	protein_coding	123.019	-0.660678	1	167.145	-0.35162	0.503235	646.738	0.0944635	0.999918	711.539	0.146534	0.681636
ENSG00000059758	CDK17	protein_coding	906.488	-0.164735	0.585444	1209.95	-0.0820978	0.849875	1525.45	-0.145729	0.999918	1487.81	-0.0931322	0.752342
ENSG00000059769	DNAJC25	protein_coding	74.0336	0.492037	1	95.3965	0.289664	0.727192	100.627	-0.157534	0.999918	129.102	0.227831	1
ENSG00000059804	SLC2A3	protein_coding	616.189	0.513069	0.162195	1292.84	-0.243201	0.831401	359.498	0.128218	0.999918	362.588	0.0165993	1
ENSG00000059915	PSD	protein_coding	122.299	-0.671648	1	185.316	-0.535763	0.196615	417.551	-0.26913	0.999918	342.5	-0.430248	1
ENSG00000060069	CTDP1	protein_coding	157.687	0.023631	1	169.673	0.219273	0.734667	134.175	-0.264575	0.999918	126.355	-0.242391	1
ENSG00000060138	YBX3	protein_coding	258.977	0.598244	0.0997751	312.991	0.281198	0.475948	43.5613	0.770646	0.999918	63.2795	0.458626	1
ENSG00000060140	STYK1	protein_coding	0.949502	-2.58724	1	0.503979	0.93016	1	2.70049	-0.643267	0.999918	2.97744	1.80528	1
ENSG00000060237	WNK1	protein_coding	1193.25	-0.375724	0.0865468	1212.28	-0.28104	0.302765	1834.23	-0.074378	0.999918	2194.44	-0.0336295	0.938887
ENSG00000060303	RPS17P5	processed_pseudogene	0.320669	0.167834	1	0.170209	0.952709	1	0.257852	1.32497	0.999918	0.558609	2.13501	1
ENSG00000060339	CCAR1	protein_coding	1425.22	-0.000846344	0.997614	1486.99	0.00738713	0.990041	1307.4	-0.0992564	0.999918	1447.61	0.107035	0.721336
ENSG00000060491	OGFR	protein_coding	193.189	-0.225677	1	213.168	-0.0958905	0.891887	107.844	-0.116942	0.999918	94.5537	-0.313153	1
ENSG00000060558	GNA15	protein_coding	0.290321	-1.08342	1	0.170209	0.952709	1	1.98172	4.34752	0.999918	1.32217	1.57312	1
ENSG00000060566	CREB3L3	protein_coding	0.14516	-0.677864	1	0.677757	2.86235	1	0.642928	-0.0131789	0.999918	0.419809	-0.210768	1
ENSG00000060642	PIGV	protein_coding	108.95	-0.0967927	1	123.75	-0.355414	0.552847	50.4733	-0.113363	0.999918	56.3657	-0.0430636	1
ENSG00000060656	PTPRU	protein_coding	277.915	0.267704	0.501086	181.476	0.11225	0.888727	254.631	-0.0356455	0.999918	98.7167	-0.218182	1
ENSG00000060688	SNRNP40	protein_coding	825.678	0.279586	0.286746	882.702	0.267541	0.371008	349.38	0.0240269	0.999918	343.193	-0.0569654	1
ENSG00000060709	RIMBP2	protein_coding	48.2449	-0.49754	1	25.4893	-1.16714	1	221.649	0.222379	0.999918	95.1068	0.147125	1
ENSG00000060718	COL11A1	protein_coding	2310.66	0.20457	0.871581	770.341	0.395967	0.10856	190.622	0.802345	0.999918	77.1963	0.867426	1
ENSG00000060749	QSER1	protein_coding	1833.47	-0.251518	0.291403	2022.14	-0.0691421	0.859303	3585.25	-0.0996734	0.999918	3076.62	0.0204402	0.963449
ENSG00000060762	MPC1	protein_coding	120.551	0.412206	1	165.326	0.268532	0.67298	162.405	-0.220922	0.999918	152.758	0.125608	1
ENSG00000060971	ACAA1	protein_coding	84.9258	0.172577	1	79.1861	0.0868966	1	42.1724	-0.308806	0.999918	44.7553	0.0398821	1
ENSG00000060982	BCAT1	protein_coding	8352.2	0.366932	0.583455	4481.19	-0.0471104	0.935164	1274.39	0.239812	0.999918	566.508	0.638429	1
ENSG00000061273	HDAC7	protein_coding	149.279	0.00492349	1	157.326	-0.0467786	0.964458	110.755	0.133781	0.999918	125.117	-0.13241	1
ENSG00000061337	LZTS1	protein_coding	146.211	-1.06354	1	81.9155	0.141132	1	764.306	-0.239733	0.999918	518.398	-0.227838	1
ENSG00000061455	PRDM6	protein_coding	2.05627	-1.39747	1	2.44904	-1.50422	1	5.96272	0.787011	0.999918	9.97922	0.646033	1
ENSG00000061492	WNT8A	protein_coding	0.7871	-0.159927	1	0.332862	-1.61856	1	1.82798	-0.607143	0.999918	1.48002	2.4032	1
ENSG00000061656	SPAG4	protein_coding	10.9968	0.14447	1	12.7979	-2.36056	1	4.26462	-0.317825	0.999918	2.90425	-0.0319512	1
ENSG00000061676	NCKAP1	protein_coding	2435.07	0.056089	0.865196	2773.34	0.0750934	0.845589	1658.3	-0.0971127	0.999918	1629.59	-0.0681205	0.84985
ENSG00000061794	MRPS35	protein_coding	491.153	0.261116	0.434328	635.325	0.274928	0.381702	302.634	-0.0859363	0.999918	343.749	0.0967951	1
ENSG00000061918	GUCY1B3	protein_coding	86.9311	-0.307419	1	62.9849	-0.491221	1	101.556	-0.520544	0.999918	48.4207	-0.412143	1
ENSG00000061936	SFSWAP	protein_coding	343.016	-0.115088	0.806036	328.413	-0.0399393	0.958256	567.766	-0.185702	0.999918	598.915	-0.0407625	1
ENSG00000061938	TNK2	protein_coding	122.796	-0.38499	1	120.302	-0.229636	0.781363	99.1899	-0.23313	0.999918	80.8864	-0.388293	1
ENSG00000061987	MON2	protein_coding	730.435	-0.233296	0.430691	897.19	-0.0800978	0.861561	437.048	-0.183916	0.999918	543.856	-0.0674838	1
ENSG00000062038	CDH3	protein_coding	32.5732	0.294591	1	77.8079	0.192217	1	87.3117	0.0100178	0.999918	106.334	-0.281781	1
ENSG00000062096	ARSF	protein_coding	0.496779	1.20356	1	0	0	1	1.30011	1.06957	0.999918	0.971449	-0.034739	1
ENSG00000062194	GPBP1	protein_coding	2023.25	0.0636738	0.866506	2414.05	0.112861	0.74261	1641.07	-0.0720902	0.999918	1605.19	0.0258167	0.959387
ENSG00000062282	DGAT2	protein_coding	7.06755	-0.180916	1	17.5138	-0.13885	1	16.4627	0.159537	0.999918	17.7881	-0.106221	1
ENSG00000062370	ZNF112	protein_coding	255.083	-0.089851	0.875056	297.934	0.112337	0.852834	257.863	-0.179135	0.999918	298.353	0.0309557	1
ENSG00000062485	CS	protein_coding	998.839	-0.351046	0.132051	1244.74	-0.453136	0.0193846	1463.21	0.011917	0.999918	1822.63	-0.139628	0.567298
ENSG00000062524	LTK	protein_coding	0.471208	-0.781088	1	0.994027	0.663536	1	2.11336	-0.306391	0.999918	1.69103	4.44513	1
ENSG00000062582	MRPS24	protein_coding	0.77949	-0.0154618	1	0.313917	-1.60772	1	0.117265	-0.52074	0.999918	0	0	1
ENSG00000062598	ELMO2	protein_coding	475.392	-0.216769	0.532037	516.784	-0.232488	0.496872	666.634	-0.109181	0.999918	627.109	-0.228826	1
ENSG00000062650	WAPL	protein_coding	1351.37	-0.0362404	0.922395	1397	0.0796834	0.851961	783.768	-0.067261	0.999918	771.354	0.107403	0.789203
ENSG00000062716	VMP1	protein_coding	511.575	0.380634	0.166478	649.975	0.416593	0.123691	587.895	-0.0554487	0.999918	645.781	-0.0360519	0.959069
ENSG00000062725	APPBP2	protein_coding	1174.66	-0.173103	0.531703	1265.69	0.0112202	0.98652	1274.08	-0.0122051	0.999918	1365.62	-0.018025	0.974263
ENSG00000062822	POLD1	protein_coding	479.11	0.120829	0.788519	450.262	0.0059812	0.994724	42.9464	-0.496362	0.999918	38.9215	-0.334313	1
ENSG00000063015	SEZ6	protein_coding	2.9054	-0.653956	1	5.94223	-0.600829	1	105.855	-0.396334	0.999918	55.1742	-0.0762787	1
ENSG00000063046	EIF4B	protein_coding	6763.81	0.0820049	0.800634	8229.79	-0.0256982	0.952359	3542.36	0.0411846	0.999918	4587.61	0.00732775	0.983582
ENSG00000063127	SLC6A16	protein_coding	35.3157	-0.157828	1	39.5842	-0.368273	1	3.82108	2.10967	0.999918	6.36148	0.597886	1
ENSG00000063169	BICRA	protein_coding	25.8168	-0.228992	1	21.0385	-0.0903287	1	13.8883	-0.246261	0.999918	11.0775	0.102864	1
ENSG00000063176	SPHK2	protein_coding	115.709	0.040537	1	102.773	0.22601	0.777967	142.819	0.02177	0.999918	157.567	-0.324562	1
ENSG00000063177	RPL18	protein_coding	5942.06	0.343739	0.11138	6517	0.185934	0.563641	1728.03	-0.0280788	0.999918	2127.47	-0.024894	0.958622
ENSG00000063180	CA11	protein_coding	111.818	0.0160049	1	166.866	0.113092	0.883149	467.388	0.0490489	0.999918	445.199	0.0053641	1
ENSG00000063241	ISOC2	protein_coding	148.882	0.528192	1	241.852	0.332057	0.417196	48.5402	-0.307709	0.999918	41.8421	-0.354863	1
ENSG00000063244	U2AF2	protein_coding	1237.04	0.112837	0.731378	1180.76	-0.000439974	0.999966	711.321	-0.0768383	0.999918	742.978	-0.264122	0.312125
ENSG00000063245	EPN1	protein_coding	331.692	-0.410246	0.207967	291.33	-0.271909	0.582058	437.701	-0.133819	0.999918	359.219	-0.460574	1
ENSG00000063322	MED29	protein_coding	295.538	-0.130597	0.795143	292.722	-0.090003	0.889362	588.86	0.182585	0.999918	647.354	0.0920017	0.859437
ENSG00000063438	AHRR	protein_coding	5.7122	0.612329	1	7.6331	-0.203556	1	10.7337	0.13334	0.999918	11.8836	0.179678	1
ENSG00000063515	GSC2	protein_coding	0	0	1	0	0	1	0.117265	-0.52074	0.999918	0	0	1
ENSG00000063587	ZNF275	protein_coding	152.75	-0.389596	1	118.099	-0.163004	0.855791	269.51	-0.15276	0.999918	229.903	-0.0825446	1
ENSG00000063601	MTMR1	protein_coding	272.257	-0.303322	0.430012	286.668	-0.22309	0.645323	359.878	-0.224342	0.999918	318.384	-0.0992378	1
ENSG00000063660	GPC1	protein_coding	523.936	-0.434902	0.0920724	324.545	-0.216485	0.622906	409.817	-0.102759	0.999918	353.213	-0.486196	1
ENSG00000063761	ADCK1	protein_coding	51.5638	0.0209616	1	63.6376	-0.267852	1	36.6237	0.168783	0.999918	38.9878	-0.236627	1
ENSG00000063854	HAGH	protein_coding	165.715	0.0694887	1	195.146	0.188025	0.760104	201.448	-0.128061	0.999918	183.162	-0.261627	1
ENSG00000063978	RNF4	protein_coding	714.074	0.0540339	0.896384	923.755	0.00159613	0.999433	895.687	-0.0631626	0.999918	1027.65	-0.0245286	0.969282
ENSG00000064012	CASP8	protein_coding	1.83243	-0.771353	1	1.36323	1.76079	1	4.35904	2.56918	0.999918	3.80361	-0.458994	1
ENSG00000064042	LIMCH1	protein_coding	474.736	0.347925	0.82789	436.919	-0.36964	0.322552	303.677	0.235351	0.999918	493.481	-0.294098	1
ENSG00000064102	INTS13	protein_coding	354.675	0.296141	0.444872	438.446	0.0864802	0.878775	200.177	-0.0176672	0.999918	240.361	-0.0706629	1
ENSG00000064115	TM7SF3	protein_coding	538.593	0.296583	0.33251	687.173	0.280116	0.4072	165.717	0.335393	0.999918	189.913	-0.0707072	1
ENSG00000064195	DLX3	protein_coding	4.37029	0.226993	1	2.95788	-1.32813	1	1.19365	0.229496	0.999918	2.79964	2.11438	1
ENSG00000064199	SPA17	protein_coding	308.523	0.267479	0.479816	320.167	0.422449	0.19831	208.128	0.0456542	0.999918	276.363	0.0529602	1
ENSG00000064201	TSPAN32	protein_coding	0.137551	-0.670093	1	0.153789	-0.81843	1	0.249614	-1.28234	0.999918	0.186203	1.49738	1
ENSG00000064205	WISP2	protein_coding	0	0	1	0	0	1	0.424858	0.393371	0.999918	0.435315	0.305454	1
ENSG00000064218	DMRT3	protein_coding	18.6656	-1.14081	1	0.513641	2.10803	1	17.8739	-0.0369326	0.999918	0.962278	-0.21328	1
ENSG00000064225	ST3GAL6	protein_coding	70.9326	0.0530072	1	95.7556	0.155029	0.868837	5.39332	0.88358	0.999918	5.39474	0.35948	1
ENSG00000064270	ATP2C2	protein_coding	0.326047	0.203465	1	0.833898	0.885011	1	1.74914	2.0186	0.999918	2.71112	2.53892	1
ENSG00000064300	NGFR	protein_coding	393.768	0.038537	0.947798	423.165	-0.0905265	0.902192	223.908	0.379661	0.999918	131.41	-0.211347	1
ENSG00000064309	CDON	protein_coding	1336.03	-0.490626	0.0763005	98.4774	-0.372895	0.603926	583.333	0.0184478	0.999918	239.164	-0.356443	1
ENSG00000064313	TAF2	protein_coding	748.01	-0.0462487	0.912695	870.836	0.089831	0.842117	885.023	-0.0744433	0.999918	918.55	0.0696264	0.880603
ENSG00000064393	HIPK2	protein_coding	1262.42	-0.331311	0.159169	898.771	-0.100507	0.819894	2083.55	-0.0688461	0.999918	2692.99	-0.0637756	0.844822
ENSG00000064419	TNPO3	protein_coding	1144.15	-0.0789868	0.824877	1122.3	0.0358667	0.943856	821.883	-0.0235933	0.999918	875.798	-0.0987989	0.80425
ENSG00000064489	BORCS8-MEF2B	protein_coding	0	0	1	0	0	1	0	0	1	0	0	1
ENSG00000064490	RFXANK	protein_coding	340.527	0.31806	0.359928	387.245	0.2514	0.507965	71.259	0.451175	0.999918	76.6132	-0.270599	1
ENSG00000064545	TMEM161A	protein_coding	131.581	0.0547602	1	151.414	-0.0270287	0.980957	29.4854	-0.375224	0.999918	24.7772	-0.394189	1
ENSG00000064547	LPAR2	protein_coding	198.895	-0.614656	0.13423	187.179	-0.57718	0.206435	124.512	-0.486428	0.999918	165.077	-0.379849	1
ENSG00000064601	CTSA	protein_coding	93.2807	-0.20088	1	108.416	-0.314964	0.65459	84.9107	-0.328507	0.999918	72.0654	-0.256168	1
ENSG00000064607	SUGP2	protein_coding	1317.55	-0.133614	0.65028	1496.4	-0.11332	0.736622	1499.18	-0.166687	0.999918	1403.15	-0.178193	0.443539
ENSG00000064651	SLC12A2	protein_coding	423.895	-0.162643	0.706335	402.021	0.0115943	0.98853	298.577	0.176244	0.999918	340.48	-0.00608262	1
ENSG00000064652	SNX24	protein_coding	200.695	0.120625	0.837767	170.815	0.286698	0.612053	121.52	0.321872	0.999918	130.193	0.0247334	1
ENSG00000064655	EYA2	protein_coding	42.2326	-0.662436	1	30.419	0.0499633	1	13.8653	-0.278257	0.999918	11.5476	0.832817	1
ENSG00000064666	CNN2	protein_coding	793.869	0.54005	0.0242023	826.132	0.188144	0.621449	503.935	0.0374292	0.999918	352.041	-0.233129	1
ENSG00000064687	ABCA7	protein_coding	62.4506	-0.278418	1	58.5096	-0.350001	1	113.926	-0.230118	0.999918	83.6213	-0.462325	1
ENSG00000064692	SNCAIP	protein_coding	353.988	-0.0353336	0.951913	244.202	-0.406405	0.311087	428.051	-0.208153	0.999918	604.911	-0.272205	1
ENSG00000064703	DDX20	protein_coding	434.417	0.113197	0.804481	476.974	0.14837	0.764054	392.107	0.097082	0.999918	415.332	0.0774379	1
ENSG00000064726	BTBD1	protein_coding	908.021	0.0121038	0.980086	1143.64	0.136026	0.710321	1123.55	-0.0131741	0.999918	1154.96	-0.0439252	0.935388
ENSG00000064763	FAR2	protein_coding	21.4154	-0.290449	1	16.2296	0.210201	1	84.1839	2.00592	0.0209475	25.2435	0.0100852	1
ENSG00000064787	BCAS1	protein_coding	0.492713	-0.860359	1	0.314825	0.0550232	1	2.81292	1.18326	0.999918	2.72998	2.95769	1
ENSG00000064835	POU1F1	protein_coding	0.175509	1.1014	1	0	0	1	0.708242	0.312706	0.999918	0.286166	1.54917	1
ENSG00000064886	CHI3L2	protein_coding	0.275102	-1.07247	1	0	0	1	4.36251	0.352842	0.999918	2.19379	3.02249	1
ENSG00000064932	SBNO2	protein_coding	79.8186	-0.0308235	1	89.0198	0.020027	1	71.7743	-0.082987	0.999918	74.1152	-0.632753	1
ENSG00000064933	PMS1	protein_coding	713.752	0.221462	0.487927	847.337	0.190116	0.56203	298.751	0.0279215	0.999918	362.815	0.109231	1
ENSG00000064961	HMG20B	protein_coding	312.62	0.111139	0.827942	298.97	0.370043	0.309173	49.3029	0.126096	0.999918	66.9637	-0.370092	1
ENSG00000064989	CALCRL	protein_coding	185.47	-0.018184	1	193.297	0.0295754	0.980957	11.3893	0.903291	0.999918	9.33241	1.12172	1
ENSG00000064995	TAF11	protein_coding	270.932	0.132598	0.805351	287.995	0.192179	0.699433	232.492	-0.088559	0.999918	244.157	0.108228	1
ENSG00000064999	ANKS1A	protein_coding	343.924	-0.23194	0.561184	333.328	-0.196782	0.694616	1034.16	-0.0613492	0.999918	751.941	-0.188214	0.59047
ENSG00000065000	AP3D1	protein_coding	663.742	-0.150101	0.670797	727.38	-0.0261997	0.967729	1545.29	-0.0171551	0.999918	1690.93	-0.0876554	0.77841
ENSG00000065029	ZNF76	protein_coding	197.95	-0.111761	0.85225	204.353	0.00215295	0.999467	139.181	-0.10982	0.999918	145.219	-0.21797	1
ENSG00000065054	SLC9A3R2	protein_coding	10.8851	0.206388	1	7.24031	-0.416808	1	33.6984	-0.124741	0.999918	25.9969	-0.139279	1
ENSG00000065057	NTHL1	protein_coding	133.559	0.607302	1	116.429	0.345656	0.580556	33.7389	-0.443329	0.999918	30.9588	0.216109	1
ENSG00000065060	UHRF1BP1	protein_coding	459.684	-0.0655264	0.893367	506.406	-0.0933263	0.860725	503.331	0.00312742	0.999918	620.817	-0.149097	1
ENSG00000065135	GNAI3	protein_coding	1955.58	0.0776477	0.817623	2235.66	0.093636	0.807645	1076.54	0.0202652	0.999918	1363.69	0.0623375	0.871747
ENSG00000065150	IPO5	protein_coding	7151.44	0.179667	0.511264	7583.56	0.0914876	0.781614	1442.84	0.127651	0.999918	1620.78	0.0258443	0.959387
ENSG00000065154	OAT	protein_coding	483.541	0.244944	0.443376	438.066	0.227384	0.551181	373.226	0.0637945	0.999918	301.698	-0.162082	1
ENSG00000065183	WDR3	protein_coding	606.247	0.248109	0.430691	662.464	0.165957	0.66698	315.191	0.0894422	0.999918	346.738	-0.0550888	1
ENSG00000065243	PKN2	protein_coding	1462.54	0.00508905	0.990346	1682.63	0.115387	0.744815	615.395	-0.0449682	0.999918	722.923	0.105875	0.817454
ENSG00000065268	WDR18	protein_coding	241.72	0.168627	0.736251	237.905	0.0590665	0.938387	47.3213	-0.00732184	0.999918	43.3561	-0.600637	1
ENSG00000065308	TRAM2	protein_coding	184.228	-0.0253603	1	167.733	0.0687433	0.941535	65.2643	0.522051	0.999918	126.512	-0.326301	1
ENSG00000065320	NTN1	protein_coding	109.632	0.300908	1	591.48	-0.273431	0.378597	107.148	-0.281676	0.999918	387.725	-0.818669	1
ENSG00000065325	GLP2R	protein_coding	0.137551	-0.670093	1	0	0	1	2.41735	0.00735106	0.999918	1.48869	2.65274	1
ENSG00000065328	MCM10	protein_coding	800.631	0.230326	0.469934	728.356	0.207987	0.601886	39.3184	1.58966	0.999918	44.0829	0.694384	1
ENSG00000065357	DGKA	protein_coding	16.9998	-0.236873	1	30.0131	-0.61408	1	35.3092	-0.528414	0.999918	28.6041	-0.347743	1
ENSG00000065361	ERBB3	protein_coding	19.8238	0.492844	1	11.9892	-0.21454	1	10.651	0.576029	0.999918	6.49228	1.00128	1
ENSG00000065371	ROPN1	protein_coding	0.175509	1.1014	1	0.176303	0.95217	1	1.57353	0.75924	0.999918	1.10959	0.504091	1
ENSG00000065413	ANKRD44	protein_coding	88.0597	-0.437911	1	163.602	-0.46408	0.342396	509.746	-0.210372	0.999918	1195.66	0.0633786	0.884417
ENSG00000065427	KARS	protein_coding	1485.51	0.40302	0.0517026	1577.57	0.304651	0.188222	799.796	0.0539358	0.999918	890.787	-0.13249	0.701132
ENSG00000065457	ADAT1	protein_coding	115.349	0.261642	1	135.464	0.0636179	0.951433	132.656	0.182542	0.999918	124.866	0.0722504	1
ENSG00000065485	PDIA5	protein_coding	29.2188	0.473604	1	35.447	-0.245827	1	8.84464	0.670888	0.999918	5.84305	1.46389	1
ENSG00000065491	TBC1D22B	protein_coding	177.946	-0.145954	1	186.899	0.0629773	0.939168	203.613	-0.0849137	0.999918	175.502	-0.0788217	1
ENSG00000065518	NDUFB4	protein_coding	468.359	0.478006	0.0846225	534.613	0.325759	0.257187	370.692	-0.0374791	0.999918	445.635	-0.0876861	1
ENSG00000065526	SPEN	protein_coding	575.911	-0.289495	0.412729	551.322	-0.27284	0.393209	942.033	-0.0981338	0.999918	986.662	-0.0251176	0.969282
ENSG00000065534	MYLK	protein_coding	199.85	-0.0681681	0.912406	150.332	0.0798662	0.926221	39.059	0.719732	0.999918	36.1739	0.76482	1
ENSG00000065548	ZC3H15	protein_coding	926.87	0.343175	0.155317	966.562	0.46015	0.0523907	768.113	0.01125	0.999918	801.38	0.235684	0.389378
ENSG00000065559	MAP2K4	protein_coding	854.633	-0.0362484	0.9301	1093.84	0.0367932	0.943856	1205.33	-0.118308	0.999918	1284.07	-0.17022	0.490235
ENSG00000065600	TMEM206	protein_coding	215.872	0.180323	0.72789	209.587	0.275933	0.595105	149.861	-0.159181	0.999918	161.661	0.076313	1
ENSG00000065609	SNAP91	protein_coding	228.155	-0.91019	0.0291388	187.175	-0.582511	0.115	1787.53	-0.0013875	0.999918	1272.89	-0.104196	0.766883
ENSG00000065613	SLK	protein_coding	1372.47	-0.0188666	0.967865	1700.96	0.0552046	0.90304	868.093	-0.00558812	0.999918	1004.71	0.271491	0.208758
ENSG00000065615	CYB5R4	protein_coding	270.229	0.107738	0.841389	347.945	0.323607	0.421377	342.803	0.0444018	0.999918	340.183	0.382284	1
ENSG00000065618	COL17A1	protein_coding	0.642651	-1.46009	1	0.655841	0.627052	1	8.19793	1.96697	0.999918	8.13176	1.87757	1
ENSG00000065621	GSTO2	protein_coding	45.4194	-0.945679	1	44.2109	-0.461155	1	23.6894	-0.561687	0.999918	25.5441	-0.534783	1
ENSG00000065665	SEC61A2	protein_coding	155.666	-0.178125	1	148.51	-0.212167	0.754324	370.57	-0.122912	0.999918	337.259	0.0241633	1
ENSG00000065675	PRKCQ	protein_coding	40.742	-0.137973	1	90.95	0.133054	1	23.5312	-0.0151081	0.999918	19.2028	0.0899041	1
ENSG00000065717	TLE2	protein_coding	0.359228	1.87577	1	33.7608	-0.258109	1	6.82674	-0.743747	0.999918	64.3253	-0.833382	1
ENSG00000065802	ASB1	protein_coding	311.667	-0.208162	0.604003	285.308	-0.146858	0.796608	226.969	-0.126538	0.999918	276.639	0.0607137	1
ENSG00000065809	FAM107B	protein_coding	860.375	0.0790565	0.843206	781.381	0.134559	0.750404	618.367	-0.165587	0.999918	726.896	0.136903	0.717623
ENSG00000065833	ME1	protein_coding	6.569	-0.0710235	1	7.07934	-0.186908	1	4.04174	-0.262115	0.999918	10.013	-0.623318	1
ENSG00000065882	TBC1D1	protein_coding	761.739	-0.0805428	0.844008	624.56	-0.0224282	0.973205	245.316	0.0618168	0.999918	255.028	0.141808	1
ENSG00000065883	CDK13	protein_coding	823.415	-0.155594	0.634396	920.173	-0.0231331	0.967252	893.674	-0.108868	0.999918	962.701	-0.11891	0.717623
ENSG00000065911	MTHFD2	protein_coding	756.668	0.819089	0.00813799	681.903	0.339801	0.223457	166.561	0.358633	0.999918	255.035	0.361139	1
ENSG00000065923	SLC9A7	protein_coding	260.715	-0.404803	0.257272	211.231	-0.198465	0.75257	713.9	-0.277869	0.999918	540.738	-0.310013	1
ENSG00000065970	FOXJ2	protein_coding	122.788	-0.564757	1	115.686	-0.120459	0.902803	296.609	-0.129423	0.999918	250.344	-0.293307	1
ENSG00000065978	YBX1	protein_coding	5318.82	0.267788	0.217504	4769.19	0.0997442	0.746811	9248.97	-0.0572986	0.999918	8390.15	-0.103704	0.555676
ENSG00000065989	PDE4A	protein_coding	20.0378	-0.328657	1	19.7563	-0.257881	1	77.527	0.181063	0.999918	46.0975	0.137038	1
ENSG00000066027	PPP2R5A	protein_coding	100.363	0.071008	1	134.146	0.0932051	0.913719	24.8581	0.496293	0.999918	14.711	-0.152165	1
ENSG00000066032	CTNNA2	protein_coding	267.794	-0.762974	0.0501295	267.034	-0.495	0.197108	2308.54	-0.121848	0.999918	2324.08	-0.0107842	0.983244
ENSG00000066044	ELAVL1	protein_coding	717.341	-0.090331	0.813115	628.908	-0.0757583	0.87775	674.093	0.0930652	0.999918	724.579	-0.0209886	0.978411
ENSG00000066056	TIE1	protein_coding	5.62929	-1.20602	1	3.03073	2.66517	1	2.32562	0.238578	0.999918	1.98777	1.47514	1
ENSG00000066084	DIP2B	protein_coding	1188.43	-0.319248	0.148094	1403.38	-0.272483	0.250338	2200.97	0.0289738	0.999918	2775.83	-0.0110766	0.980715
ENSG00000066117	SMARCD1	protein_coding	1169.64	-0.274331	0.236535	1243.43	-0.297625	0.197108	1296.78	-0.000604084	0.999918	1170.93	-0.108395	0.725782
ENSG00000066135	KDM4A	protein_coding	698.458	-0.272735	0.346128	691.652	-0.147244	0.70559	902.249	-0.0390332	0.999918	750.923	-0.0998539	0.82917
ENSG00000066136	NFYC	protein_coding	423.49	0.0972422	0.83136	518.383	0.115085	0.806067	415.64	0.0525846	0.999918	454.075	-0.200715	1
ENSG00000066185	ZMYND12	protein_coding	5.74021	-0.658737	1	6.65603	-0.398927	1	3.49481	-0.536029	0.999918	3.58258	-0.872468	1
ENSG00000066230	SLC9A3	protein_coding	0.188496	1.07965	1	0.336431	0.0635929	1	2.29755	0.451878	0.999918	0.467952	-0.212733	1
ENSG00000066248	NGEF	protein_coding	1.16369	1.65111	1	5.54586	0.50158	1	7.1665	0.379035	0.999918	9.43243	0.713277	1
ENSG00000066279	ASPM	protein_coding	2755.85	-0.0994004	0.778099	2873.43	-0.0985136	0.767927	102.293	0.714849	0.999918	163.601	0.766379	1
ENSG00000066294	CD84	protein_coding	0.188496	1.07965	1	0	0	1	4.81295	4.08594	0.999918	3.31955	1.07627	1
ENSG00000066322	ELOVL1	protein_coding	67.5958	0.014715	1	84.313	0.299338	1	28.5573	0.0264258	0.999918	36.8364	-0.47248	1
ENSG00000066336	SPI1	protein_coding	0.329591	-1.47671	1	0	0	1	1.15212	-3.09567	0.999918	1.25358	3.9876	1
ENSG00000066379	ZNRD1	protein_coding	235.32	0.583671	0.106029	287.451	0.413635	0.226556	29.2949	-0.412358	0.999918	28.5247	0.0720865	1
ENSG00000066382	MPPED2	protein_coding	230.84	-0.949898	0.00865321	302.432	-0.336172	0.381702	458.849	-0.398155	0.999918	364.801	-0.0252519	1
ENSG00000066405	CLDN18	protein_coding	0.188496	1.07965	1	0.172734	-0.835596	1	1.32252	-0.380409	0.999918	0.419809	-0.210768	1
ENSG00000066422	ZBTB11	protein_coding	410.376	-0.04112	0.937079	475.517	0.0113236	0.987934	584.801	-0.18174	0.999918	582.132	-0.0417221	1
ENSG00000066427	ATXN3	protein_coding	558.312	0.126603	0.73723	673.697	0.178377	0.618725	462.379	-0.0593923	0.999918	549.723	0.0661782	1
ENSG00000066455	GOLGA5	protein_coding	415.569	-0.0479414	0.923398	584.256	0.212643	0.53272	581.168	-0.095276	0.999918	694.028	0.297287	0.247044
ENSG00000066468	FGFR2	protein_coding	216.258	0.841663	0.565354	527.226	-0.0382659	0.981179	84.4573	1.16064	0.999918	78.4099	-0.383744	1
ENSG00000066557	LRRC40	protein_coding	733.847	0.223181	0.439386	802.514	0.179843	0.683887	760.174	-0.089497	0.999918	754.117	0.111973	0.776007
ENSG00000066583	ISOC1	protein_coding	195.956	0.353326	1	300.744	0.1153	0.846462	127.992	0.163967	0.999918	177.891	0.130116	1
ENSG00000066629	EML1	protein_coding	591.084	-0.157706	0.654837	555.128	-0.101253	0.830031	443.239	-0.0800622	0.999918	481.128	0.0554249	1
ENSG00000066651	TRMT11	protein_coding	348.259	0.153062	0.749924	453.999	0.157098	0.72446	159.873	-0.0572474	0.999918	198.082	0.37083	1
ENSG00000066654	THUMPD1	protein_coding	972.501	0.0211016	0.962292	1243.58	0.0567541	0.902402	852.994	0.0691364	0.999918	1002.64	0.0957187	0.799474
ENSG00000066697	MSANTD3	protein_coding	253.507	-0.0988395	0.854951	275.743	-0.02757	0.973205	491.667	-0.162762	0.999918	556.963	0.0139513	1
ENSG00000066735	KIF26A	protein_coding	413.236	-0.51022	0.0987966	416.543	-0.443247	0.10856	276.321	0.125585	0.999918	400.351	-0.50325	1
ENSG00000066739	ATG2B	protein_coding	562.238	-0.269066	0.366656	574.419	-0.176302	0.656221	925.57	0.0739694	0.999918	1055.9	0.158358	0.563151
ENSG00000066777	ARFGEF1	protein_coding	1059.91	-0.212686	0.437351	1058.47	-0.0193455	0.973205	1468.1	-0.0466623	0.999918	1389.97	0.00779129	0.987888
ENSG00000066813	ACSM2B	protein_coding	0	0	1	0.321164	0.054536	1	3.90878	0.235526	0.999918	3.50408	0.224238	1
ENSG00000066827	ZFAT	protein_coding	110.638	-0.125105	1	134.933	0.00194618	0.999694	103.98	0.129879	0.999918	116.815	-0.124201	1
ENSG00000066855	MTFR1	protein_coding	265.857	0.392792	0.295348	220.711	0.247492	0.644226	158.515	-0.0181979	0.999918	177.614	-0.130028	1
ENSG00000066923	STAG3	protein_coding	3.13718	-0.487205	1	3.86359	0.193455	1	7.36417	1.49564	0.999918	2.42976	0.140628	1
ENSG00000066926	FECH	protein_coding	185.754	-0.101198	1	172.024	-0.188463	0.776629	142.379	-0.105015	0.999918	169.503	-0.295035	1
ENSG00000066933	MYO9A	protein_coding	859.083	-0.262875	0.318358	853.673	-0.152413	0.663553	1300.16	-0.150854	0.999918	1240.64	-0.032174	0.948884
ENSG00000067048	DDX3Y	protein_coding	1248	-0.0409726	0.924566	1668.35	-0.0618944	0.892585	1004.18	-0.149529	0.999918	1163.41	0.0236495	0.969282
ENSG00000067057	PFKP	protein_coding	211.876	0.383502	0.453028	144.934	-0.281297	0.725182	60.5929	0.381953	0.999918	39.5124	-0.418105	1
ENSG00000067064	IDI1	protein_coding	1572.39	0.1773	0.484328	1409.96	0.293053	0.27805	1783.56	-0.0235087	0.999918	1640.84	0.0995632	0.720927
ENSG00000067066	SP100	protein_coding	1.28951	1.00168	1	0.647997	0.0661003	1	6.0588	1.29323	0.999918	4.86014	0.66966	1
ENSG00000067082	KLF6	protein_coding	80.976	-0.0306042	1	100.299	-0.254617	0.742078	175.649	-0.43056	0.999918	276.91	0.334811	1
ENSG00000067113	PLPP1	protein_coding	78.4382	0.369257	1	80.2663	0.11809	1	129.741	0.0956555	0.999918	110.64	-0.0720925	1
ENSG00000067141	NEO1	protein_coding	1505.74	0.0176349	0.970936	1149.59	-0.0904277	0.830149	5594	-0.069486	0.999918	3266.73	-0.103962	0.625997
ENSG00000067167	TRAM1	protein_coding	1183.35	0.158619	0.613935	1397.16	0.299131	0.225107	614.41	0.0206966	0.999918	750.055	0.0189174	0.978411
ENSG00000067177	PHKA1	protein_coding	232.91	-0.132588	0.803627	189.505	-0.174323	0.790901	56.4739	0.627114	0.999918	53.7605	0.240969	1
ENSG00000067182	TNFRSF1A	protein_coding	144.684	-0.0312708	1	103.364	-0.0579286	0.964458	94.4217	-0.149355	0.999918	48.75	0.0465866	1
ENSG00000067191	CACNB1	protein_coding	102.755	-0.606529	1	86.6391	-0.444942	1	626.654	-0.0748155	0.999918	515.127	-0.367431	1
ENSG00000067208	EVI5	protein_coding	379.959	-0.0401571	0.935324	420.152	-0.0115058	0.98848	279.572	-0.0419392	0.999918	276.817	0.209913	1
ENSG00000067221	STOML1	protein_coding	46.4034	0.0466021	1	59.7452	-0.0478385	1	85.7146	-0.0708088	0.999918	90.1102	-0.422925	1
ENSG00000067225	PKM	protein_coding	6552.29	-0.0264543	0.948687	5768.43	-0.461317	0.00483047	4523.04	-0.0186225	0.999918	4088.41	-0.215966	0.17298
ENSG00000067248	DHX29	protein_coding	571.361	0.0029285	0.995264	557.341	0.238798	0.57434	772.702	-0.0632453	0.999918	775.188	0.0825514	0.858308
ENSG00000067334	DNTTIP2	protein_coding	706.013	0.367193	0.158968	810.897	0.424175	0.143316	709.003	-0.0677005	0.999918	767.417	0.115739	0.757528
ENSG00000067365	METTL22	protein_coding	118.157	0.0418058	1	128.925	-0.00629933	0.997417	115.544	-0.331879	0.999918	109.384	-0.11342	1
ENSG00000067369	TP53BP1	protein_coding	3207.41	-0.259564	0.257272	3859.13	-0.123872	0.698701	5958.37	-0.0115359	0.999918	7865.51	-0.0129369	0.975422
ENSG00000067445	TRO	protein_coding	1416.91	-0.208214	0.474578	1504.01	-0.0570002	0.890595	1767.57	-0.0689817	0.999918	1725.31	-0.165529	0.459373
ENSG00000067533	RRP15	protein_coding	414.874	0.140882	0.739961	494.744	0.0737086	0.88966	336.459	-0.0054727	0.999918	427.226	0.270075	1
ENSG00000067560	RHOA	protein_coding	2014.87	0.147372	0.617912	2151.31	0.0521524	0.89726	1356.97	0.159438	0.999918	1684.19	0.170103	0.422795
ENSG00000067596	DHX8	protein_coding	656.897	-0.152754	0.661461	691.58	-0.0965918	0.829812	515.306	0.0363485	0.999918	514.969	0.0345067	1
ENSG00000067601	PMS2P4	transcribed_unprocessed_pseudogene	15.6548	-0.736381	1	16.8951	0.039598	1	21.1382	0.0940241	0.999918	16.1459	0.205625	1
ENSG00000067606	PRKCZ	protein_coding	69.9328	0.00215771	1	53.1838	-0.171018	1	338.065	-0.00712699	0.999918	322.791	-0.255606	1
ENSG00000067646	ZFY	protein_coding	340.02	-0.155085	0.718907	307.175	0.173293	0.736763	348.543	0.0372653	0.999918	402.298	0.0454781	1
ENSG00000067704	IARS2	protein_coding	933.355	0.0734755	0.856251	1052.71	-0.0503958	0.913508	294.917	0.0884674	0.999918	300.344	0.0077288	1
ENSG00000067715	SYT1	protein_coding	946.89	-0.417051	0.15297	1848.78	-0.315391	0.148921	4929.09	0.0599041	0.999918	3433.79	0.196742	0.27218
ENSG00000067798	NAV3	protein_coding	925.689	-0.324785	0.246422	309.628	-0.834889	0.00136404	2359.09	-0.367945	0.999918	682.745	-0.264095	0.505616
ENSG00000067829	IDH3G	protein_coding	156.322	-0.0724568	1	157.026	-0.309285	0.576976	358.079	-0.10025	0.999918	344.438	-0.213306	1
ENSG00000067836	ROGDI	protein_coding	132.769	0.0388909	1	123.5	0.124117	0.886581	424.675	-0.188843	0.999918	308.976	-0.332442	1
ENSG00000067840	PDZD4	protein_coding	451.552	-0.598635	0.0281009	437.061	-0.424307	0.175913	2131.89	-0.258275	0.999918	1663.07	-0.337727	0.0658038
ENSG00000067842	ATP2B3	protein_coding	1.16205	-2.26907	1	2.65241	-1.60678	1	50.6852	0.0850854	0.999918	29.1581	-0.104424	1
ENSG00000067900	ROCK1	protein_coding	822.918	-0.0334268	0.939119	1035.27	-0.0152352	0.980957	476.036	-0.0218742	0.999918	578.867	0.0985668	1
ENSG00000067955	CBFB	protein_coding	642.62	0.183969	0.575165	677.709	0.166243	0.659087	196.541	0.209648	0.999918	176.798	-0.153442	1
ENSG00000067992	PDK3	protein_coding	145.307	-0.0887912	1	158.508	-0.326677	0.534671	43.2859	0.125479	0.999918	40.0487	-0.32535	1
ENSG00000068001	HYAL2	protein_coding	414.556	0.174599	0.652288	627.334	0.0814167	0.866176	328.79	-0.150314	0.999918	330.487	-0.368629	1
ENSG00000068024	HDAC4	protein_coding	145.098	-0.138994	1	150.28	-0.0625274	0.950289	167.805	0.110697	0.999918	152.691	-0.366441	1
ENSG00000068028	RASSF1	protein_coding	80.8389	0.0696411	1	76.4486	0.105533	1	37.3402	-0.110049	0.999918	43.9893	-0.0959263	1
ENSG00000068078	FGFR3	protein_coding	217.967	1.0436	0.561147	698.83	-0.492578	0.0339985	9.03934	1.10496	0.999918	27.3657	0.550437	1
ENSG00000068079	IFI35	protein_coding	4.30937	0.487576	1	3.98835	0.854698	1	1.8156	3.50069	0.999918	0.704467	-0.199075	1
ENSG00000068097	HEATR6	protein_coding	430.114	-0.142075	0.722267	489.666	-0.123941	0.786527	337.631	0.164583	0.999918	417.721	0.011354	1
ENSG00000068120	COASY	protein_coding	129.027	-0.0807203	1	152.285	-0.170859	0.8177	93.6102	-0.119694	0.999918	96.5734	-0.203088	1
ENSG00000068137	PLEKHH3	protein_coding	87.8615	-0.321557	1	80.2074	-0.125243	1	93.2536	-0.0424604	0.999918	76.661	-0.140405	1
ENSG00000068305	MEF2A	protein_coding	575.254	-0.21296	0.504454	609.011	-0.139945	0.731948	1061.8	0.0172727	0.999918	932.475	0.0913639	0.830371
ENSG00000068308	OTUD5	protein_coding	318.511	-0.224404	0.565945	321.236	-0.158401	0.755315	544.129	-0.014487	0.999918	575.605	-0.15788	1
ENSG00000068323	TFE3	protein_coding	133.161	0.0216138	1	124.323	0.0208973	0.986449	221.433	-0.0776263	0.999918	226.611	-0.222517	1
ENSG00000068354	TBC1D25	protein_coding	46.6988	-0.023288	1	54.707	-0.368501	1	146.042	-0.110351	0.999918	145.547	-0.262273	1
ENSG00000068366	ACSL4	protein_coding	951.22	0.118758	0.73512	1018.76	-0.00491378	0.994724	1802.24	0.165554	0.999918	1263.69	0.192506	0.457112
ENSG00000068383	INPP5A	protein_coding	219.976	-0.0595433	0.928383	300.676	-0.137574	0.818624	406.738	-0.134181	0.999918	361.386	-0.264151	1
ENSG00000068394	GPKOW	protein_coding	162.935	0.0614932	1	189.261	0.117354	0.868871	188.899	0.0739279	0.999918	216.121	-0.00143767	1
ENSG00000068400	GRIPAP1	protein_coding	326.721	-0.233474	0.551635	433.094	-0.194857	0.634148	555.278	-0.0664884	0.999918	598.07	-0.122924	1
ENSG00000068438	FTSJ1	protein_coding	187.623	-0.0965768	1	193.541	0.0392145	0.965645	369.037	-0.142707	0.999918	385.819	-0.236901	1
ENSG00000068489	PRR11	protein_coding	181.611	-0.00169152	1	118.142	0.0177029	0.988666	46.5684	0.456638	0.999918	51.0505	-0.156196	1
ENSG00000068615	REEP1	protein_coding	194.814	-0.838496	1	177.869	-0.963225	0.0315197	2156.17	-0.0285173	0.999918	1507.7	-0.052652	0.921107
ENSG00000068650	ATP11A	protein_coding	390.396	0.0417522	0.93404	345.514	0.0279229	0.970478	227.881	0.151132	0.999918	219.299	0.01362	1
ENSG00000068654	POLR1A	protein_coding	692.531	-0.082938	0.831643	643.938	0.0289687	0.96323	520.283	0.0996296	0.999918	545.302	-0.256764	1
ENSG00000068697	LAPTM4A	protein_coding	578.732	0.395642	0.181512	895.272	0.532502	0.0171601	264.478	0.0861494	0.999918	315.693	0.166402	1
ENSG00000068724	TTC7A	protein_coding	123.104	-0.000765846	1	141.316	-0.0656055	0.951689	153.538	-0.226165	0.999918	161.908	-0.166721	1
ENSG00000068745	IP6K2	protein_coding	807.887	0.0966928	0.790636	934.484	0.0212272	0.970486	1365.11	-0.00787832	0.999918	1287.1	-0.153398	0.549681
ENSG00000068781	STON1-GTF2A1L	protein_coding	1.02141	-1.79688	1	1.83962	-0.0756284	1	1.7212	1.5721	0.999918	0.146598	-0.275625	1
ENSG00000068784	SRBD1	protein_coding	577.964	0.182528	0.603873	702.394	0.172485	0.680499	251.784	0.102735	0.999918	302.761	0.119866	1
ENSG00000068796	KIF2A	protein_coding	999.53	0.055479	0.886518	1175.73	0.0215485	0.969906	1380.06	0.0101647	0.999918	1343.28	0.0951762	0.773789
ENSG00000068831	RASGRP2	protein_coding	3.05429	0.211432	1	11.2868	-0.135948	1	12.8175	-0.217516	0.999918	16.7064	-0.531358	1
ENSG00000068878	PSME4	protein_coding	702.898	0.0029632	0.995253	688.095	0.192436	0.57467	523.095	0.0235687	0.999918	620.677	0.200129	1
ENSG00000068885	IFT80	protein_coding	360.177	0.00296231	0.995741	438.053	0.109572	0.83327	109.029	0.176342	0.999918	121.835	0.211296	1
ENSG00000068903	SIRT2	protein_coding	170.748	-0.113413	1	189.269	-0.102723	0.891887	421.236	-0.246806	0.999918	328.471	-0.277458	1
ENSG00000068912	ERLEC1	protein_coding	501.896	0.0864016	0.84434	611.529	0.0480802	0.928472	590.864	-0.0633653	0.999918	619.293	0.0495462	1
ENSG00000068971	PPP2R5B	protein_coding	107.067	-0.468467	1	100.967	-0.386618	0.558176	303.542	-0.0401279	0.999918	214.398	-0.449911	1
ENSG00000068976	PYGM	protein_coding	15.1901	0.0403788	1	32.7403	-0.754816	1	8.10604	0.950702	0.999918	6.67953	0.522835	1
ENSG00000068985	PAGE1	protein_coding	0	0	1	0	0	1	0.840591	-0.195677	0.999918	0.165014	1.50479	1
ENSG00000069011	PITX1	protein_coding	0.838045	1.15601	1	3.64947	-0.443628	1	0.390201	0.411954	0.999918	0.586331	1.49383	1
ENSG00000069018	TRPC7	protein_coding	0	0	1	0	0	1	5.08553	-0.664135	0.999918	1.4772	-0.245183	1
ENSG00000069020	MAST4	protein_coding	82.3624	-0.102858	1	85.9301	-0.262782	1	82.3239	-0.227426	0.999918	76.8103	0.4029	1
ENSG00000069122	ADGRF5	protein_coding	0.35994	0.219037	1	0.170209	0.952709	1	3.79171	-0.473807	0.999918	3.24508	-0.232296	1
ENSG00000069188	SDK2	protein_coding	973.238	-0.000948363	0.997614	923.871	0.107108	0.845589	347.598	-0.411564	0.999918	540.447	-0.467991	1
ENSG00000069206	ADAM7	protein_coding	0.175509	1.1014	1	0.170209	0.952709	1	6.11674	0.98876	0.999918	2.72158	3.85325	1
ENSG00000069248	NUP133	protein_coding	1498.9	0.094042	0.782584	1734.15	0.0434545	0.922219	872.254	0.0716198	0.999918	923.268	0.0401309	0.94034
ENSG00000069275	NUCKS1	protein_coding	9289.1	0.0108611	0.979178	9632.35	0.0526435	0.899995	4640.74	0.0168817	0.999918	4065.8	0.0045882	0.987888
ENSG00000069329	VPS35	protein_coding	2397.52	0.0880058	0.7702	2490.26	0.110106	0.771304	2094.9	0.00738654	0.999918	2706.91	0.0471003	0.887357
ENSG00000069345	DNAJA2	protein_coding	1108.9	0.0516793	0.897973	1291.83	0.0770441	0.85332	1391.56	0.0599236	0.999918	1658.34	-0.0180538	0.97558
ENSG00000069399	BCL3	protein_coding	3.98752	0.933558	1	7.3582	-1.03398	1	5.65348	-0.234064	0.999918	2.43138	-0.653525	1
ENSG00000069424	KCNAB2	protein_coding	66.0837	-0.681388	1	47.5426	-0.279553	1	88.1477	-0.212463	0.999918	64.3205	0.0591659	1
ENSG00000069431	ABCC9	protein_coding	7.08074	0.879127	1	4.6326	0.611575	1	11.304	1.80905	0.999918	8.17176	0.0486672	1
ENSG00000069482	GAL	protein_coding	0.170731	1.09311	1	0.320257	-1.22317	1	2.978	1.07984	0.999918	2.39073	3.24396	1
ENSG00000069493	CLEC2D	protein_coding	88.6788	0.0817221	1	101.804	0.0257936	0.98266	26.9749	0.366554	0.999918	36.1289	0.287348	1
ENSG00000069509	FUNDC1	protein_coding	171.189	0.188214	1	184.566	0.281845	0.589061	169.833	-0.153608	0.999918	197.946	0.164327	1
ENSG00000069535	MAOB	protein_coding	4.55505	-0.897083	1	1.33876	-1.59971	1	2.87216	-1.50207	0.999918	4.55492	-0.756664	1
ENSG00000069667	RORA	protein_coding	141.282	-0.549538	1	153.641	-0.446472	0.362179	194.777	-0.0206194	0.999918	75.7768	0.491273	1
ENSG00000069696	DRD4	protein_coding	40.2086	0.329401	1	4.07523	-0.729374	1	3.36307	2.53502	0.999918	3.7671	1.67329	1
ENSG00000069702	TGFBR3	protein_coding	39.5052	0.178114	1	58.2328	-0.201585	1	14.5889	0.65035	0.999918	17.1909	0.708648	1
ENSG00000069712	KIAA1107	protein_coding	0	0	1	0	0	1	0	0	1	0	0	1
ENSG00000069764	PLA2G10	protein_coding	0	0	1	0.176303	0.95217	1	0.45039	0.215803	0.999918	0.53742	2.65143	1
ENSG00000069812	HES2	protein_coding	0.616565	0.10498	1	0.346512	1.74412	1	2.84475	2.55518	0.999918	2.79387	2.60974	1
ENSG00000069849	ATP1B3	protein_coding	615.628	0.206536	0.530792	702.046	0.314771	0.306986	291.645	-0.106138	0.999918	228.218	0.00582391	1
ENSG00000069869	NEDD4	protein_coding	257.021	0.181007	0.725906	588.348	0.161853	0.694616	50.2843	0.938936	0.999918	71.9822	0.26707	1
ENSG00000069943	PIGB	protein_coding	68.9836	0.430255	1	82.1064	0.519288	1	42.1212	0.525759	0.999918	38.4022	0.24808	1
ENSG00000069956	MAPK6	protein_coding	1988.06	-0.02701	0.94673	2503.33	0.0387526	0.936936	3920.22	-0.015146	0.999918	4194.24	0.102944	0.621909
ENSG00000069966	GNB5	protein_coding	204.637	-0.0788427	0.898593	130.773	-0.0538903	0.960208	300.006	0.00870133	0.999918	238.867	-0.125827	1
ENSG00000069974	RAB27A	protein_coding	46.5314	0.329294	1	51.5743	-0.268857	1	24.2215	-0.195265	0.999918	25.3457	0.482542	1
ENSG00000069998	HDHD5	protein_coding	313.838	0.129602	0.817021	312.186	-0.122447	0.831401	103.351	0.0535796	0.999918	87.8203	-0.0757539	1
ENSG00000070010	UFD1	protein_coding	250.344	0.317168	0.462028	270.325	0.295206	0.535217	206.825	0.0210205	0.999918	216.409	0.0690294	1
ENSG00000070018	LRP6	protein_coding	2399.18	-0.241635	0.299121	2724.54	-0.272239	0.18607	1844.34	-0.108075	0.999918	2008.57	-0.00631555	0.987888
ENSG00000070019	GUCY2C	protein_coding	0.420263	-1.82824	1	0.497467	0.916165	1	4.88885	-1.00181	0.999918	2.35136	3.16382	1
ENSG00000070031	SCT	protein_coding	0	0	1	0	0	1	0.349585	0.510789	0.999918	0.186203	1.49738	1
ENSG00000070047	PHRF1	protein_coding	371.85	-0.273595	0.442232	372.122	-0.22199	0.602701	301.663	-0.138987	0.999918	309.853	-0.193395	1
ENSG00000070061	ELP1	protein_coding	953.963	-0.0897478	0.799572	1032.44	0.0379922	0.939168	609.677	-0.0707653	0.999918	548.685	-0.239265	1
ENSG00000070081	NUCB2	protein_coding	375.151	0.228666	0.528905	475.752	0.335785	0.285695	566.315	-0.0997164	0.999918	544.699	0.205748	1
ENSG00000070087	PFN2	protein_coding	2786.31	0.165907	0.482212	2516.29	0.165683	0.584283	1934.9	-0.0891684	0.999918	1642.79	0.0338157	0.941775
ENSG00000070159	PTPN3	protein_coding	107.759	0.411779	1	88.7489	0.0299951	1	32.305	0.572577	0.999918	15.182	0.852674	1
ENSG00000070182	SPTB	protein_coding	3.63985	-0.750861	1	3.58694	-0.958014	1	38.3704	-0.304181	0.999918	12.5657	-0.108406	1
ENSG00000070190	DAPP1	protein_coding	0	0	1	0.153789	-0.81843	1	1.442	-2.06305	0.999918	1.26983	-0.110468	1
ENSG00000070193	FGF10	protein_coding	1.4565	-0.13266	1	28.0818	0.279361	1	4.62774	2.1742	0.999918	2.18333	2.73861	1
ENSG00000070214	SLC44A1	protein_coding	479.796	-0.111817	0.817135	710.599	-0.398226	0.0969467	147.205	0.313888	0.999918	276.129	0.171268	1
ENSG00000070269	TMEM260	protein_coding	410.941	-0.0220416	0.966353	452.671	-0.029228	0.965645	331.071	-0.166476	0.999918	345.872	0.0779106	1
ENSG00000070366	SMG6	protein_coding	516.19	-0.166536	0.638324	528.808	-0.00266394	0.99816	753.605	0.0195182	0.999918	914.645	-0.0958882	0.805849
ENSG00000070367	EXOC5	protein_coding	1975.19	-0.0857877	0.79079	2655.39	0.0503711	0.913575	1807.56	-0.155336	0.999918	2146.82	0.168424	0.393038
ENSG00000070371	CLTCL1	protein_coding	98.0075	0.0591052	1	90.2088	0.0664656	1	77.9082	0.0731336	0.999918	93.8029	0.0410933	1
ENSG00000070388	FGF22	protein_coding	1.02648	-1.70306	1	0.6632	-1.48486	1	0.911212	-2.97928	0.999918	1.7531	0.570655	1
ENSG00000070404	FSTL3	protein_coding	42.2998	-0.0392844	1	71.4139	0.300612	1	28.7847	0.37336	0.999918	26.5324	-0.474384	1
ENSG00000070413	DGCR2	protein_coding	533.473	-0.183278	0.604003	554.735	-0.112611	0.818868	756.764	-0.0263667	0.999918	637.949	-0.326149	0.213814
ENSG00000070423	RNF126	protein_coding	100.035	0.182224	1	85.2205	-0.132573	1	136.853	-0.0170649	0.999918	113.997	-0.458385	1
ENSG00000070444	MNT	protein_coding	86.8244	-0.310222	1	84.4369	-0.0735502	1	332.285	-0.145586	0.999918	316.27	-0.105082	1
ENSG00000070476	ZXDC	protein_coding	198.296	-0.419265	0.343728	198.723	-0.233424	0.688938	292.99	-0.10076	0.999918	315.559	-0.0275737	1
ENSG00000070495	JMJD6	protein_coding	138.124	0.0170215	1	161.018	0.0167313	0.987934	273.735	-0.404105	0.999918	296.534	-0.301453	1
ENSG00000070501	POLB	protein_coding	325.19	0.21151	0.58668	364.53	0.277464	0.444237	514.22	-0.19309	0.999918	549.312	-0.142169	1
ENSG00000070526	ST6GALNAC1	protein_coding	0	0	1	0.172734	-0.835596	1	2.30863	1.94251	0.999918	2.52598	1.09576	1
ENSG00000070540	WIPI1	protein_coding	58.1471	-0.0574576	1	82.9015	0.00960337	1	27.6155	0.227952	0.999918	40.6872	0.220063	1
ENSG00000070601	FRMPD1	protein_coding	6.02322	-0.913194	1	4.25389	-1.18342	1	8.58971	-0.379563	0.999918	6.16921	0.00773798	1
ENSG00000070610	GBA2	protein_coding	448.898	-0.0424245	0.9301	419.827	-0.21372	0.583285	408.298	-0.230396	0.999918	382.233	-0.409461	1
ENSG00000070614	NDST1	protein_coding	582.93	-0.157474	0.67474	623.061	-0.0149383	0.981824	921.382	-0.0522581	0.999918	971.031	-0.107656	0.750709
ENSG00000070669	ASNS	protein_coding	10.2788	-0.610806	1	10.7735	0.195387	1	17.3368	-0.252496	0.999918	15.493	-0.654088	1
ENSG00000070718	AP3M2	protein_coding	487.412	0.0195171	0.971675	509.8	0.000178075	0.999977	551.289	0.0803781	0.999918	495.602	0.0453496	1
ENSG00000070729	CNGB1	protein_coding	81.7142	-0.971932	1	25.9518	-0.503686	1	713.856	0.141688	0.999918	468.216	-0.167405	1
ENSG00000070731	ST6GALNAC2	protein_coding	0	0	1	0.320257	-1.22317	1	1.23819	3.10574	0.999918	0.186203	1.49738	1
ENSG00000070748	CHAT	protein_coding	0.467142	-2.23808	1	0.172734	-0.835596	1	1.98741	2.03244	0.999918	3.71781	0.722325	1
ENSG00000070756	PABPC1	protein_coding	1875.76	0.049941	0.88912	1961.18	-0.00970442	0.98652	1222.84	0.333935	0.999918	1405.44	0.339124	0.0584275
ENSG00000070759	TESK2	protein_coding	15.6087	0.345905	1	32.4142	-0.0761368	1	5.32636	1.13203	0.999918	7.7195	-0.0434031	1
ENSG00000070761	CFAP20	protein_coding	463.54	0.200846	0.563789	575.219	0.407319	0.117636	930.105	-0.0403625	0.999918	1166.73	-0.117357	0.696083
ENSG00000070770	CSNK2A2	protein_coding	190.549	-0.189622	1	216.488	-0.107947	0.880576	124.413	0.0204563	0.999918	142.006	-0.083972	1
ENSG00000070778	PTPN21	protein_coding	287.737	-0.153759	0.750731	268.028	0.0253796	0.976128	237.848	0.201151	0.999918	376.956	0.104534	1
ENSG00000070785	EIF2B3	protein_coding	207.433	0.49897	0.19414	227.159	0.331517	0.520822	94.9741	-0.189972	0.999918	88.387	0.132982	1
ENSG00000070808	CAMK2A	protein_coding	39.4817	-0.708403	1	47.3	-1.04723	1	672.15	-0.115156	0.999918	460.143	-0.331586	1
ENSG00000070814	TCOF1	protein_coding	631.681	0.164202	0.653646	634.744	-0.0672267	0.893931	425.308	0.0421432	0.999918	401.01	-0.180201	1
ENSG00000070831	CDC42	protein_coding	2263.99	0.237386	0.277052	2897.85	0.264767	0.24541	3245.69	-0.00136028	0.999918	3292.09	-0.0145494	0.974263
ENSG00000070882	OSBPL3	protein_coding	111.935	0.503859	1	70.155	0.450138	1	27.2463	0.711164	0.999918	33.2256	0.359941	1
ENSG00000070886	EPHA8	protein_coding	3.67065	-2.10316	1	1.85787	-0.888643	1	11.782	0.424221	0.999918	38.9633	-0.851814	1
ENSG00000070915	SLC12A3	protein_coding	0.275102	-1.07247	1	0.655243	1.24751	1	2.02702	-0.242636	0.999918	5.22179	1.52636	1
ENSG00000070950	RAD18	protein_coding	382.444	0.141085	0.740639	363.273	0.0635267	0.91846	113.118	0.222262	0.999918	167.081	0.489362	1
ENSG00000070961	ATP2B1	protein_coding	2032	-0.0198063	0.963659	1855.82	-0.00965675	0.986766	2224.04	0.0347368	0.999918	2146.11	0.0807974	0.810238
ENSG00000070985	TRPM5	protein_coding	0.65026	-1.38679	1	0.659385	-2.74344	1	2.03923	0.886086	0.999918	2.70431	-0.796411	1
ENSG00000071051	NCK2	protein_coding	219.835	-0.0459092	0.94673	226.149	0.137402	0.830234	600.73	-0.22468	0.999918	751.353	-0.098144	0.830371
ENSG00000071054	MAP4K4	protein_coding	2848.44	-0.271046	0.214528	2759.77	-0.168208	0.507965	4872.77	-0.058463	0.999918	5697.84	0.0352386	0.922631
ENSG00000071073	MGAT4A	protein_coding	277.263	-0.270648	0.487549	265.927	-0.193746	0.72446	639.252	-0.100873	0.999918	570.037	-0.254388	1
ENSG00000071082	RPL31	protein_coding	7181.9	0.588207	0.00337342	8470.24	0.427387	0.0133386	793.313	0.217923	0.999918	901.24	0.169881	0.577568
ENSG00000071127	WDR1	protein_coding	1141.79	0.221727	0.422051	1196.79	0.297307	0.224584	923.66	0.0187422	0.999918	879.253	-0.102098	0.7967
ENSG00000071189	SNX13	protein_coding	1112.56	-0.270292	0.323943	995.335	0.0180832	0.974498	775.534	0.0384911	0.999918	799.963	0.0889025	0.84881
ENSG00000071203	MS4A12	protein_coding	0	0	1	0	0	1	0.907626	-1.18019	0.999918	2.02888	2.79648	1
ENSG00000071205	ARHGAP10	protein_coding	48.5695	1.23176	1	35.2459	0.493058	1	23.0578	1.26434	0.999918	84.7063	0.660633	1
ENSG00000071242	RPS6KA2	protein_coding	343.889	-0.183646	0.679023	301.707	-0.222654	0.662385	1506.43	0.176743	0.999918	1125.58	0.00400359	0.992032
ENSG00000071243	ING3	protein_coding	285.372	0.42096	0.242658	350.226	0.110013	0.856626	211.805	-0.063227	0.999918	243.529	0.476372	1
ENSG00000071246	VASH1	protein_coding	313.441	-0.324173	0.356073	332.822	-0.209105	0.704203	372.692	-0.0628675	0.999918	401.682	-0.344044	1
ENSG00000071282	LMCD1	protein_coding	80.6791	0.833137	1	59.4432	0.100928	1	13.6241	1.63252	0.999918	14.674	-0.179644	1
ENSG00000071462	BUD23	protein_coding	137.29	0.378552	1	144.665	0.234011	0.726795	108.309	-0.264331	0.999918	100.535	-0.0416626	1
ENSG00000071537	SEL1L	protein_coding	1009.57	-0.156867	0.635752	1293.96	-0.0813914	0.852834	1010	-0.0612576	0.999918	932.449	0.0247179	0.970779
ENSG00000071539	TRIP13	protein_coding	243.778	0.279468	0.509695	183.698	-0.0669412	0.936309	22.5842	0.689093	0.999918	22.8571	0.0694146	1
ENSG00000071553	ATP6AP1	protein_coding	390.883	-0.321249	0.304917	420.706	-0.231763	0.620186	627.615	0.0420442	0.999918	493.71	-0.29098	1
ENSG00000071564	TCF3	protein_coding	1004.82	-0.110163	0.743923	896.855	-0.137981	0.710978	338.839	0.319003	0.999918	451.13	-0.0975315	1
ENSG00000071575	TRIB2	protein_coding	855.325	-0.197719	0.487711	757.055	-0.103715	0.808526	1600.06	-0.0997004	0.999918	1959.74	0.115611	0.655431
ENSG00000071626	DAZAP1	protein_coding	349.457	0.186997	0.636187	309.438	0.27839	0.492792	445.887	-0.0396151	0.999918	327.181	-0.0412786	1
ENSG00000071655	MBD3	protein_coding	494.399	0.0540446	0.905742	487.077	-0.000125012	0.999977	171.152	0.0909484	0.999918	135.179	-0.489089	1
ENSG00000071677	PRLH	protein_coding	0	0	1	0	0	1	0.257852	1.32497	0.999918	0	0	1
ENSG00000071794	HLTF	protein_coding	1714.35	-0.0254371	0.949302	2136.14	-0.0500603	0.908351	1508.96	-0.0761419	0.999918	1719.86	0.0436887	0.922631
ENSG00000071859	FAM50A	protein_coding	258.954	0.21306	0.646341	256.851	0.235721	0.6302	305.666	-0.0345625	0.999918	293.722	-0.225849	1
ENSG00000071889	FAM3A	protein_coding	86.9393	-0.122502	1	97.6688	-0.0301107	0.980957	80.4215	-0.272193	0.999918	76.1382	-0.0284545	1
ENSG00000071894	CPSF1	protein_coding	452.783	-0.274785	0.395731	474.367	-0.347502	0.306047	252.519	-0.0478695	0.999918	279.985	-0.317788	1
ENSG00000071909	MYO3B	protein_coding	6.44529	0.607495	1	38.7806	0.775183	1	9.73185	0.28313	0.999918	14.8738	0.53997	1
ENSG00000071967	CYBRD1	protein_coding	116.082	0.390723	1	104.081	-0.460918	0.57329	4.85202	1.53828	0.999918	3.63118	4.27968	1
ENSG00000071991	CDH19	protein_coding	4.85534	0.1136	1	1.65326	1.55629	1	6.29837	0.810027	0.999918	2.44941	2.49249	1
ENSG00000071994	PDCD2	protein_coding	574.596	0.0983691	0.80193	677.193	0.151698	0.704307	511.345	-0.110758	0.999918	537.098	0.0827987	1
ENSG00000072041	SLC6A15	protein_coding	513.087	0.305407	0.490416	496.041	-0.219052	0.590384	723.868	0.203373	0.999918	648.677	0.0490414	0.940277
ENSG00000072042	RDH11	protein_coding	434.177	-0.0329415	0.948658	503.305	-0.0744372	0.889362	1154.56	0.0389142	0.999918	1033.77	0.0399994	0.94034
ENSG00000072062	PRKACA	protein_coding	183.261	-0.167223	1	162.265	-0.0298355	0.976055	617.005	0.0994414	0.999918	574.184	-0.190733	1
ENSG00000072071	ADGRL1	protein_coding	362.278	-0.347635	0.334366	285.097	-0.2313	0.670802	1287.76	-0.236109	0.999918	1014.71	-0.446103	0.0347349
ENSG00000072080	SPP2	protein_coding	0	0	1	0	0	1	1.43758	0.786499	0.999918	0	0	1
ENSG00000072110	ACTN1	protein_coding	522.564	0.194899	0.5931	288.553	0.553547	0.105561	186.067	0.48954	0.999918	102.376	0.118006	1
ENSG00000072121	ZFYVE26	protein_coding	381.55	-0.484282	0.123221	404.497	-0.247615	0.507965	489.927	0.122667	0.999918	504.155	-0.039038	1
ENSG00000072133	RPS6KA6	protein_coding	325.08	-0.21766	0.576101	566.791	-0.0434438	0.943856	360.189	-0.00218301	0.999918	548.089	0.135747	1
ENSG00000072134	EPN2	protein_coding	309.143	-0.137983	0.772813	318.567	-0.0955199	0.874863	428.75	-0.179228	0.999918	429.493	-0.243238	1
ENSG00000072135	PTPN18	protein_coding	112.993	-0.147929	1	95.1099	-0.135763	0.889362	100.128	-0.0244965	0.999918	102.988	0.0198676	1
ENSG00000072163	LIMS2	protein_coding	3.33024	-0.546826	1	1.65092	-1.34649	1	1.63606	0.281522	0.999918	4.16959	0.551971	1
ENSG00000072182	ASIC4	protein_coding	24.5058	-0.333487	1	13.5016	-1.5751	1	54.5328	0.214136	0.999918	22.5197	0.03016	1
ENSG00000072195	SPEG	protein_coding	68.9841	-0.682654	1	93.076	-0.537695	1	125.602	-0.218924	0.999918	102.697	-0.525444	1
ENSG00000072201	LNX1	protein_coding	7.74672	-0.675015	1	2.65135	-0.321044	1	31.1443	-0.0239452	0.999918	2.72205	0.923601	1
ENSG00000072210	ALDH3A2	protein_coding	802.3	0.219196	0.437804	738.04	0.161833	0.673362	336.151	0.124228	0.999918	397.736	0.104604	1
ENSG00000072274	TFRC	protein_coding	1795.51	0.110982	0.738605	1902.88	0.093955	0.798094	963.147	0.0209044	0.999918	1207.56	0.0213351	0.974263
ENSG00000072310	SREBF1	protein_coding	191.483	-0.479586	1	281.966	-0.379792	0.332926	94.3624	0.103494	0.999918	134.094	-0.343974	1
ENSG00000072315	TRPC5	protein_coding	1.11878	0.191561	1	0.481292	-0.0878312	1	85.3771	1.03982	0.999918	4.41206	0.115357	1
ENSG00000072364	AFF4	protein_coding	1809.62	-0.338615	0.128722	1939.44	-0.101259	0.769029	3247.37	0.0187928	0.999918	3519.62	0.115627	0.549681
ENSG00000072401	UBE2D1	protein_coding	329.984	0.0357915	0.949302	375.46	0.282802	0.486868	410.347	0.0128083	0.999918	361.397	0.156421	1
ENSG00000072415	MPP5	protein_coding	759.277	0.164324	0.687498	1001.43	0.290358	0.336665	152.13	0.0453213	0.999918	258.359	0.179875	1
ENSG00000072422	RHOBTB1	protein_coding	474.608	-0.0414063	0.934839	557.446	-0.27548	0.412037	301.842	0.237145	0.999918	314.012	-0.212322	1
ENSG00000072501	SMC1A	protein_coding	1868.59	-0.275923	0.23381	1934.44	-0.382038	0.0365694	1155.11	0.015883	0.999918	1058.93	-0.044798	0.93562
ENSG00000072506	HSD17B10	protein_coding	384.752	0.301105	0.378738	365.77	0.22069	0.60008	112.38	0.0689238	0.999918	122.589	-0.26745	1
ENSG00000072518	MARK2	protein_coding	219.799	-0.257805	0.554004	208.055	-0.241485	0.651619	320.623	-0.150489	0.999918	288.839	-0.15022	1
ENSG00000072571	HMMR	protein_coding	649.164	0.471288	0.0546547	567.007	0.341017	0.298669	45.8112	0.848865	0.999918	57.3274	0.442273	1
ENSG00000072609	CHFR	protein_coding	162.445	-0.0693766	1	180.558	0.023123	0.981114	245.404	-0.0500085	0.999918	203.395	-0.228238	1
ENSG00000072657	TRHDE	protein_coding	42.6977	-0.644998	1	47.1093	-0.560571	1	709.481	0.610916	0.999918	1335.22	-0.0188735	0.978411
ENSG00000072682	P4HA2	protein_coding	101.078	0.141096	1	166.893	-0.418477	0.495191	21.5502	0.375236	0.999918	24.6045	-0.031771	1
ENSG00000072694	FCGR2B	protein_coding	0	0	1	0.161036	0.936026	1	0.504109	1.24717	0.999918	0.931265	0.372896	1
ENSG00000072736	NFATC3	protein_coding	779.894	0.0615128	0.880665	978.118	0.0544087	0.90304	565.014	-0.152656	0.999918	645.576	-0.164891	0.654633
ENSG00000072756	TRNT1	protein_coding	204.154	0.2041	0.685706	246.146	0.135103	0.823386	116.627	-0.278051	0.999918	109.549	-0.159471	1
ENSG00000072778	ACADVL	protein_coding	593.517	-0.205379	0.592723	611.394	-0.252188	0.415299	329.023	-0.0280031	0.999918	393.016	-0.202288	1
ENSG00000072786	STK10	protein_coding	78.0901	0.121448	1	99.6665	0.322088	0.66698	88.1968	-0.0283518	0.999918	95.0752	-0.123253	1
ENSG00000072803	FBXW11	protein_coding	1280.33	-0.0908321	0.799299	1540.19	-0.085065	0.832837	1628.74	0.00098126	0.999918	1814.82	-0.0841174	0.772826
ENSG00000072818	ACAP1	protein_coding	3.12116	-0.567715	1	7.00876	-0.1978	1	4.59693	0.589545	0.999918	4.47276	-0.748277	1
ENSG00000072832	CRMP1	protein_coding	2660.73	-0.30504	0.1684	2566.84	-0.240124	0.302232	10560.8	-0.0492787	0.999918	9645.25	-0.12705	0.516125
ENSG00000072840	EVC	protein_coding	99.4933	-0.02959	1	98.0886	-0.216021	0.814521	14.2408	0.551918	0.999918	14.5366	0.567433	1
ENSG00000072849	DERL2	protein_coding	502.686	0.0196954	0.968458	579.585	0.0878694	0.86114	497.207	-0.103329	0.999918	513.92	-0.0170086	1
ENSG00000072858	SIDT1	protein_coding	1.31128	-2.07878	1	0	0	1	10.7054	0.586107	0.999918	8.31556	1.61685	1
ENSG00000072864	NDE1	protein_coding	177.521	-0.0287367	1	188.78	0.00270635	0.999045	12.4664	0.418029	0.999918	14.4878	0.489144	1
ENSG00000072952	MRVI1	protein_coding	68.3286	0.00791133	1	76.6054	-0.139309	1	9.28093	-0.759244	0.999918	9.58048	-0.403661	1
ENSG00000072954	TMEM38A	protein_coding	8.32755	0.106893	1	19.2548	-0.0023337	1	23.2369	-0.544878	0.999918	26.2779	-0.22882	1
ENSG00000072958	AP1M1	protein_coding	429.419	-0.100543	0.823017	453.985	-0.0386607	0.952963	556.345	-0.187518	0.999918	447.834	-0.341854	1
ENSG00000073008	PVR	protein_coding	92.0376	-0.0108047	1	111.489	-0.184216	0.829337	205.89	0.0246207	0.999918	182.317	-0.433506	1
ENSG00000073050	XRCC1	protein_coding	357.124	-0.0164396	0.978012	371.674	-0.0620341	0.920047	347.899	-0.0803913	0.999918	466.692	-0.129488	1
ENSG00000073060	SCARB1	protein_coding	21.7609	-0.0341977	1	40.5313	-0.569932	1	25.3917	0.103141	0.999918	26.2088	0.15747	1
ENSG00000073067	CYP2W1	protein_coding	0	0	1	0.485034	0.916669	1	0.567655	-0.889146	0.999918	1.3688	1.18256	1
ENSG00000073111	MCM2	protein_coding	2171.74	0.0261498	0.94155	1975.31	-0.122983	0.715182	142.885	0.586095	0.999918	190.598	-0.0468098	1
ENSG00000073146	MOV10L1	protein_coding	0.794906	-0.145708	1	0.682806	0.599668	1	2.86178	0.0279195	0.999918	2.02214	1.02663	1
ENSG00000073150	PANX2	protein_coding	14.0853	-0.373277	1	11.4008	-0.642371	1	44.8362	0.0778393	0.999918	35.2346	-0.546569	1
ENSG00000073169	SELENOO	protein_coding	72.2505	0.0903164	1	79.1553	-0.273148	1	36.8811	-0.131893	0.999918	38.0668	-0.42072	1
ENSG00000073282	TP63	protein_coding	0.561423	0.556231	1	0	0	1	4.89684	0.535582	0.999918	2.66965	0.808713	1
ENSG00000073331	ALPK1	protein_coding	11.5843	-1.41118	1	4.4555	-0.440207	1	7.4439	2.0361	0.999918	5.89147	1.78522	1
ENSG00000073350	LLGL2	protein_coding	24.7605	0.484399	1	13.2565	0.492449	1	3.29714	0.507572	0.999918	6.58903	1.66463	1
ENSG00000073417	PDE8A	protein_coding	95.717	-0.0985281	1	133.505	-0.0742467	0.9386	99.9145	-0.283211	0.999918	95.1218	-0.0155934	1
ENSG00000073464	CLCN4	protein_coding	240.281	-0.532977	0.134076	181.837	-0.43209	0.326021	899.774	-0.226613	0.999918	510.6	-0.240633	1
ENSG00000073536	NLE1	protein_coding	252.546	0.0752252	0.892893	245.85	-0.0382115	0.964458	268.5	-0.0245225	0.999918	227.466	-0.155065	1
ENSG00000073578	SDHA	protein_coding	402.868	0.115183	0.79561	412.451	0.0181401	0.980957	370.345	-0.217896	0.999918	423.424	-0.11295	1
ENSG00000073584	SMARCE1	protein_coding	1533.22	0.0981387	0.750996	1652.85	0.106835	0.790118	2351.72	-0.100681	0.999918	2558.59	-0.013836	0.978411
ENSG00000073598	FNDC8	protein_coding	0.188496	1.07965	1	0.321164	0.054536	1	0.490171	2.09663	0.999918	0.737103	0.265018	1
ENSG00000073605	GSDMB	protein_coding	52.6607	-0.111997	1	54.467	-0.304344	1	35.727	-0.22041	0.999918	56.9752	-0.0149466	1
ENSG00000073614	KDM5A	protein_coding	1709.6	-0.367867	0.106876	1842.58	-0.196543	0.430684	1286.01	-0.0179524	0.999918	1606.96	-0.0505224	0.911543
ENSG00000073670	ADAM11	protein_coding	47.4494	-0.802976	1	47.3559	-0.547864	1	57.2824	-0.0845168	0.999918	46.1455	-0.281811	1
ENSG00000073711	PPP2R3A	protein_coding	559.383	-0.187786	0.583882	567.265	-0.140813	0.742527	1327.21	-0.197699	0.999918	1370.44	0.0132192	0.980715
ENSG00000073712	FERMT2	protein_coding	722.054	0.176955	0.61757	860.631	0.348695	0.181499	595.441	0.104178	0.999918	711.812	0.121257	0.767636
ENSG00000073734	ABCB11	protein_coding	1.85919	-1.98697	1	0.834806	1.62913	1	11.7049	-0.318743	0.999918	1.43023	-0.318768	1
ENSG00000073737	DHRS9	protein_coding	0.137551	-0.670093	1	0	0	1	1.32626	1.57798	0.999918	2.01211	4.63307	1
ENSG00000073754	CD5L	protein_coding	0	0	1	0	0	1	1.89329	-0.406346	0.999918	1.26758	3.02661	1
ENSG00000073756	PTGS2	protein_coding	0.543658	1.07369	1	0.170209	0.952709	1	3.53954	2.0436	0.999918	1.77335	1.95823	1
ENSG00000073792	IGF2BP2	protein_coding	1074.16	0.00376183	0.993688	1140.27	-0.0568785	0.895896	1101.64	-0.00437111	0.999918	1203.47	-0.0433977	0.931228
ENSG00000073803	MAP3K13	protein_coding	362.643	-0.215855	0.561433	379.216	-0.0570128	0.926493	1172.2	0.0727673	0.999918	1103.49	0.0353153	0.94669
ENSG00000073849	ST6GAL1	protein_coding	313.903	-0.0236721	0.967865	143.541	0.138762	0.867211	703.397	0.143463	0.999918	469.605	-0.177726	1
ENSG00000073861	TBX21	protein_coding	0.492713	-0.860359	1	0	0	1	1.40692	-0.40074	0.999918	2.34837	3.32172	1
ENSG00000073905	VDAC1P1	processed_pseudogene	2.02041	1.25374	1	1.02841	0.334026	1	1.01665	-3.24195	0.999918	0.467952	-0.212733	1
ENSG00000073910	FRY	protein_coding	385.636	-0.619822	0.0213831	263.239	-0.402043	0.314452	2050.21	-0.121147	0.999918	1156.94	-0.120711	0.735573
ENSG00000073921	PICALM	protein_coding	1343.44	-0.000144423	0.999289	1529.66	0.0960464	0.80214	2009.14	-0.0877262	0.999918	2087.8	0.0462246	0.913981
ENSG00000073969	NSF	protein_coding	430.263	0.192214	0.611867	551.819	0.0239893	0.970634	838.118	-0.0287543	0.999918	692.848	-0.0995537	0.846151
ENSG00000074047	GLI2	protein_coding	275.545	-0.0868585	0.876757	22.2942	1.29895	1	36.9187	1.55436	0.999918	25.5862	0.310765	1
ENSG00000074054	CLASP1	protein_coding	1807.39	-0.220265	0.370677	2149.38	-0.14434	0.624596	1808.92	-0.0663101	0.999918	1998.1	-0.046632	0.905879
ENSG00000074071	MRPS34	protein_coding	334.679	0.519419	0.0777012	321.551	0.406281	0.256235	193.217	0.146265	0.999918	237.244	-0.427194	1
ENSG00000074181	NOTCH3	protein_coding	535.828	-0.163754	0.643016	523.54	-0.226049	0.56203	70.0931	0.704124	0.999918	60.0658	-0.0983649	1
ENSG00000074201	CLNS1A	protein_coding	1453.27	0.254903	0.307289	1503.08	0.163456	0.57437	646.485	0.145216	0.999918	837.162	0.143946	0.661032
ENSG00000074211	PPP2R2C	protein_coding	39.0545	-0.396832	1	8.58998	-0.40629	1	258.569	-0.0187152	0.999918	44.5685	0.0850127	1
ENSG00000074219	TEAD2	protein_coding	1137.52	0.231055	0.347251	1319.11	0.199098	0.447161	73.3614	0.894217	0.999918	125.047	-0.116724	1
ENSG00000074266	EED	protein_coding	299.369	0.412823	0.205119	293.641	0.488083	0.170358	86.6755	0.0498722	0.999918	77.6833	-0.086057	1
ENSG00000074276	CDHR2	protein_coding	0.643963	-2.18848	1	1.3529	-0.00769306	1	12.7114	0.345086	0.999918	14.228	0.0128973	1
ENSG00000074317	SNCB	protein_coding	3.77654	0.102309	1	3.24907	-0.696978	1	52.6949	0.102239	0.999918	26.1599	0.298251	1
ENSG00000074319	TSG101	protein_coding	512.55	0.0308251	0.949302	639.146	0.262487	0.374288	797.838	-0.0403466	0.999918	890.526	-0.132245	0.698792
ENSG00000074356	NCBP3	protein_coding	755.137	-0.286423	0.283432	747.753	-0.150773	0.692106	1320.83	-0.0197446	0.999918	1497.46	-0.0282601	0.957171
ENSG00000074370	ATP2A3	protein_coding	2.39688	0.697738	1	1.30535	0.631728	1	3.42912	1.2842	0.999918	3.62251	1.21408	1
ENSG00000074410	CA12	protein_coding	39.7717	0.0176463	1	16.8849	-0.424583	1	25.2176	1.21246	0.999918	4.91544	2.15558	1
ENSG00000074416	MGLL	protein_coding	6.3213	-1.08142	1	21.1527	0.329255	1	52.1408	0.244769	0.999918	72.7216	0.330007	1
ENSG00000074527	NTN4	protein_coding	256.753	0.244101	0.648667	148.273	0.396817	0.430889	67.9133	0.00204561	0.999918	52.6385	-0.288896	1
ENSG00000074582	BCS1L	protein_coding	143.768	0.159838	1	127.953	0.0018229	0.999694	126.774	-0.273128	0.999918	136.899	-0.476443	1
ENSG00000074590	NUAK1	protein_coding	350.744	0.210585	0.659189	172.761	-0.0729358	0.936358	551.502	-0.123656	0.999918	539.189	-0.277987	1
ENSG00000074603	DPP8	protein_coding	375.372	-0.0312623	0.955016	482.664	0.112523	0.818041	366.374	-0.0134552	0.999918	397.718	-0.0564197	1
ENSG00000074621	SLC24A1	protein_coding	66.1042	-0.197828	1	103.804	-0.530729	0.381128	38.1876	0.486717	0.999918	41.8846	0.192716	1
ENSG00000074657	ZNF532	protein_coding	2622.59	-0.302094	0.120923	2824.91	-0.267466	0.193288	3650.72	-0.237528	0.999918	3493.85	-0.158372	0.433178
ENSG00000074660	SCARF1	protein_coding	12.6907	0.246344	1	8.27155	-0.623505	1	4.99065	-0.682061	0.999918	6.55495	-0.827045	1
ENSG00000074695	LMAN1	protein_coding	997.426	0.15207	0.667072	2460.06	0.235887	0.393609	771.618	0.01076	0.999918	931.41	0.0192482	0.978411
ENSG00000074696	HACD3	protein_coding	2285.91	0.255446	0.241135	2571.73	0.283573	0.175913	3429.13	0.001349	0.999918	3483.05	-0.0529101	0.859437
ENSG00000074706	IPCEF1	protein_coding	30.9556	-0.695947	1	11.178	-1.3841	1	131.296	0.211087	0.999918	37.4712	0.463176	1
ENSG00000074755	ZZEF1	protein_coding	358.171	-0.36329	0.256959	381.472	-0.233124	0.580556	608.228	-0.122796	0.999918	595.501	-0.0460511	1
ENSG00000074771	NOX3	protein_coding	0.18443	-0.692072	1	0.313917	-1.60772	1	1.27899	-1.68782	0.999918	0.70724	-1.40962	1
ENSG00000074800	ENO1	protein_coding	11011.8	0.248963	0.444872	11339.1	-0.509745	0.0235868	1032.01	0.170993	0.999918	1125.66	-0.3382	0.670785
ENSG00000074803	SLC12A1	protein_coding	2.81221	-0.982824	1	5.14169	-0.277167	1	16.1369	-0.592027	0.999918	138.524	0.909675	1
ENSG00000074842	MYDGF	protein_coding	131.746	0.232767	1	146.328	0.178811	0.80991	49.3789	0.191142	0.999918	42.045	-0.395216	1
ENSG00000074855	ANO8	protein_coding	171.422	-0.251872	1	148.879	-0.296692	0.638891	181.235	-0.238583	0.999918	194.268	-0.283893	1
ENSG00000074935	TUBE1	protein_coding	219.669	0.290025	0.499208	167.413	0.245794	0.699788	333.277	-0.145873	0.999918	278.802	0.208216	1
ENSG00000074964	ARHGEF10L	protein_coding	290.406	-0.194157	0.679121	358.994	-0.215931	0.638891	444.971	-0.229528	0.999918	456.44	-0.417787	1
ENSG00000074966	TXK	protein_coding	1.32669	-0.870245	1	0.492281	2.09752	1	1.12486	-0.778495	0.999918	1.82149	2.58182	1
ENSG00000075035	WSCD2	protein_coding	25.9961	-0.597924	1	33.8092	-0.106524	1	277.904	-0.0652844	0.999918	148.545	-0.104668	1
ENSG00000075043	KCNQ2	protein_coding	543.279	-0.0574503	0.8972	437.682	-0.0171393	0.981179	1312.85	-0.210596	0.999918	1095.77	-0.291306	0.153407
ENSG00000075073	TACR2	protein_coding	0.175509	1.1014	1	0	0	1	1.51202	1.14375	0.999918	1.38574	1.77505	1
ENSG00000075089	ACTR6	protein_coding	339.883	0.268998	0.483257	392.576	0.392735	0.212376	185.581	-0.123083	0.999918	207.707	0.111714	1
ENSG00000075131	TIPIN	protein_coding	135.039	0.382766	1	128.338	0.28946	0.657856	16.4317	0.660129	0.999918	24.8448	-0.037328	1
ENSG00000075142	SRI	protein_coding	668.106	0.0739065	0.866553	704.996	0.146866	0.737096	281.073	0.108656	0.999918	308.444	0.03243	1
ENSG00000075151	EIF4G3	protein_coding	1678.96	-0.256966	0.260051	1898.83	-0.232073	0.318434	2324.85	-0.128963	0.999918	2347.02	-0.131228	0.536986
ENSG00000075188	NUP37	protein_coding	365.251	0.556779	0.051045	425.436	0.43565	0.183389	43.8095	0.474405	0.999918	38.5281	0.112339	1
ENSG00000075213	SEMA3A	protein_coding	692.989	0.353686	0.304205	555.587	-0.0245183	0.98848	1475.36	0.324381	0.999918	514.716	0.27519	1
ENSG00000075218	GTSE1	protein_coding	245.663	-0.0489872	0.93404	237.295	-0.0967228	0.886357	13.6968	0.776878	0.999918	16.536	0.555204	1
ENSG00000075223	SEMA3C	protein_coding	135.649	-0.343728	1	408.859	-0.409638	0.298553	6134.58	-0.0908791	0.999918	245.211	-0.281035	1
ENSG00000075234	TTC38	protein_coding	125.301	0.124357	1	140.223	-0.1164	0.888727	21.4574	-0.268789	0.999918	35.2534	-0.561862	1
ENSG00000075239	ACAT1	protein_coding	197.271	0.344486	0.42177	190.924	0.233279	0.699788	213.636	-0.0343902	0.999918	203.518	0.0721694	1
ENSG00000075240	GRAMD4	protein_coding	169.303	-0.0383982	1	263.634	-0.0590158	0.938919	248.169	-0.121142	0.999918	205.519	-0.281184	1
ENSG00000075275	CELSR1	protein_coding	239.808	-0.00304114	0.996151	526.657	-0.0582057	0.923368	33.5553	0.974319	0.999918	59.7912	0.256923	1
ENSG00000075290	WNT8B	protein_coding	3.2882	-0.437257	1	5.73233	1.22689	1	97.5921	1.79046	0.999918	12.7243	0.736919	1
ENSG00000075292	ZNF638	protein_coding	3587.08	-0.035563	0.918601	4325.35	0.1087	0.750967	2901.51	-0.0716543	0.999918	3354	0.101308	0.644717
ENSG00000075303	SLC25A40	protein_coding	326.066	-0.0464836	0.9301	355.989	-0.0610837	0.924022	120.045	0.0244075	0.999918	130.504	0.219827	1
ENSG00000075336	TIMM21	protein_coding	193.586	0.524047	1	229.584	0.163353	0.77934	136.378	-0.0274778	0.999918	147.742	-0.0541245	1
ENSG00000075340	ADD2	protein_coding	767.624	-0.27355	0.316408	510.77	-0.507596	0.0401135	1766.91	-0.0634183	0.999918	1419.03	-0.158603	0.523705
ENSG00000075388	FGF4	protein_coding	0	0	1	0.170209	0.952709	1	1.19018	-0.122185	0.999918	7.66577	1.5234	1
ENSG00000075391	RASAL2	protein_coding	1079.84	-0.444608	0.0378924	1617.63	-0.56573	0.00149502	2385.27	-0.0533889	0.999918	2088.27	-0.0549893	0.885237
ENSG00000075399	VPS9D1	protein_coding	78.1708	-0.728261	1	62.4642	-0.29732	1	145.421	-0.207636	0.999918	108.543	-0.49336	1
ENSG00000075407	ZNF37A	protein_coding	223.11	-0.0469361	0.949794	239.115	-0.0859497	0.908185	304.178	-0.0910176	0.999918	365.631	0.069943	1
ENSG00000075413	MARK3	protein_coding	805.401	-0.0383741	0.927294	851.182	0.10685	0.793365	1205.99	-0.0575667	0.999918	1060.43	-0.0852506	0.833
ENSG00000075415	SLC25A3	protein_coding	4138.14	0.171719	0.479339	4705.94	0.0931293	0.768967	1619.12	0.064286	0.999918	1807.08	-0.0319353	0.94034
ENSG00000075420	FNDC3B	protein_coding	763.363	0.141373	0.681964	941.414	-0.0229432	0.970218	860.717	-0.0407301	0.999918	628.833	-0.101185	1
ENSG00000075426	FOSL2	protein_coding	149.348	0.794693	1	25.2189	1.63431	1	61.8019	0.229881	0.999918	38.6742	0.901205	1
ENSG00000075429	CACNG5	protein_coding	0.93918	0.215887	1	0.160128	-0.818939	1	3.97772	-0.18066	0.999918	0.977784	0.438917	1
ENSG00000075461	CACNG4	protein_coding	299.74	-0.599216	0.0781302	144.971	-0.344013	0.579813	1251.74	-0.175136	0.999918	885.32	-0.27455	0.264903
ENSG00000075539	FRYL	protein_coding	1678.31	-0.349278	0.112013	2121.89	-0.238632	0.285695	1299.6	-0.113215	0.999918	1309.36	-0.0209718	0.969282
ENSG00000075568	TMEM131	protein_coding	835.418	-0.400155	0.104996	610.021	-0.0685928	0.891441	610.067	0.0354188	0.999918	647.543	0.0815879	0.87804
ENSG00000075618	FSCN1	protein_coding	1858.69	-0.0135884	0.971437	1694.2	-0.0515992	0.899464	1646.83	-0.120187	0.999918	1552.6	-0.312939	0.0645446
ENSG00000075624	ACTB	protein_coding	16320.5	-0.0239494	0.947798	12375.6	-0.0356073	0.935867	27863.9	0.00112665	0.999918	26029.8	-0.0748696	0.694216
ENSG00000075643	MOCOS	protein_coding	28.0253	0.278695	1	15.3992	-0.067937	1	6.5755	0.508102	0.999918	4.12002	2.40886	1
ENSG00000075651	PLD1	protein_coding	14.5405	0.256451	1	6.64979	-0.487197	1	6.36612	-0.389222	0.999918	7.69765	0.804613	1
ENSG00000075673	ATP12A	protein_coding	0	0	1	0.326523	-1.61825	1	2.75068	0.246189	0.999918	3.87639	3.33387	1
ENSG00000075702	WDR62	protein_coding	85.5006	-0.0317014	1	83.8881	0.0229408	1	20.7539	0.332881	0.999918	23.0326	0.161622	1
ENSG00000075711	DLG1	protein_coding	1059.82	0.183669	0.564872	1181.72	0.169048	0.60266	501.645	-0.216821	0.999918	616.245	-0.0325261	1
ENSG00000075785	RAB7A	protein_coding	407.664	0.0527418	0.912768	414.775	-0.156142	0.727463	1241.1	-0.0400064	0.999918	1303.97	0.164425	0.510921
ENSG00000075790	BCAP29	protein_coding	515.326	0.310395	0.286746	485.715	0.216549	0.619778	203.284	0.365597	0.999918	196.062	0.532321	1
ENSG00000075826	SEC31B	protein_coding	93.5341	-0.279866	1	106.258	-0.579667	0.274058	64.3776	0.0182831	0.999918	65.0465	-0.607464	1
ENSG00000075856	SART3	protein_coding	668.547	-0.247406	0.384253	718.292	-0.240877	0.432291	561.533	-0.149559	0.999918	655.19	-0.129967	0.766883
ENSG00000075884	ARHGAP15	protein_coding	46.6641	0.219252	1	13.6226	0.0126242	1	4.73568	1.99379	0.999918	3.26297	1.93113	1
ENSG00000075886	TUBA3D	protein_coding	0	0	1	0	0	1	0.349585	0.510789	0.999918	0.495042	2.14717	1
ENSG00000075891	PAX2	protein_coding	0.453443	-0.651934	1	0.170209	0.952709	1	1.47748	1.74623	0.999918	1.46602	2.20143	1
ENSG00000075914	EXOSC7	protein_coding	276.574	0.428753	0.217649	306.361	0.200263	0.685055	81.4515	-0.0514726	0.999918	90.5645	-0.199463	1
ENSG00000075945	KIFAP3	protein_coding	537.235	-0.410741	0.134103	621.216	-0.257554	0.421377	2090.26	-0.0777835	0.999918	1754.44	-0.0607193	0.885505
ENSG00000075975	MKRN2	protein_coding	463.792	0.118787	0.776036	511.311	0.16399	0.695708	252.982	-0.0232345	0.999918	305.458	-0.105025	1
ENSG00000076003	MCM6	protein_coding	1190.01	0.353564	0.172606	1316.95	0.0928352	0.835955	70.8432	0.52554	0.999918	82.3311	0.325836	1
ENSG00000076043	REXO2	protein_coding	86.5351	0.432511	1	102.67	0.480672	0.40764	48.262	-0.0186889	0.999918	61.9869	0.138629	1
ENSG00000076053	RBM7	protein_coding	302.871	0.22376	0.590299	393.205	0.370421	0.243092	235.815	0.199389	0.999918	321.716	0.105221	1
ENSG00000076067	RBMS2	protein_coding	219.401	-0.128869	0.814437	255.894	-0.0911029	0.893076	107.416	-0.0336581	0.999918	165.174	-0.0390404	1
ENSG00000076108	BAZ2A	protein_coding	736.862	-0.241865	0.390771	853.232	-0.207401	0.540879	812.707	0.0644229	0.999918	932.8	-0.0514016	0.931228
ENSG00000076201	PTPN23	protein_coding	93.4366	-0.378267	1	90.5605	-0.222308	1	140.101	-0.0283048	0.999918	137.02	-0.170379	1
ENSG00000076242	MLH1	protein_coding	689.933	0.235806	0.419753	763.141	0.145367	0.708909	359.682	-0.0370943	0.999918	385.837	-0.0395742	1
ENSG00000076248	UNG	protein_coding	702.183	0.0795892	0.84607	812.539	0.0183902	0.977033	168.651	0.163924	0.999918	192.252	-0.262889	1
ENSG00000076258	FMO4	protein_coding	31.0394	0.160974	1	46.1794	-0.119951	1	2.1365	2.44643	0.999918	1.8679	2.67022	1
ENSG00000076321	KLHL20	protein_coding	314.371	-0.336315	0.34404	371.32	-0.0282172	0.968827	355.968	-0.123552	0.999918	353.951	0.0242356	1
ENSG00000076344	RGS11	protein_coding	7.18204	-0.779147	1	3.72333	-2.20704	1	15.949	-0.522364	0.999918	23.9445	-0.813117	1
ENSG00000076351	SLC46A1	protein_coding	110.255	-0.00844964	1	72.5537	-0.308448	1	121.897	-0.34742	0.999918	110.52	-0.261468	1
ENSG00000076356	PLXNA2	protein_coding	116.93	-0.49646	1	61.5479	0.0929756	1	1351.55	0.0583174	0.999918	408.94	-0.195105	1
ENSG00000076382	SPAG5	protein_coding	1157.52	0.159589	0.612066	1133.38	0.122445	0.726639	58.2812	0.212891	0.999918	71.7975	-0.0961846	1
ENSG00000076513	ANKRD13A	protein_coding	426.731	-0.119554	0.791096	468.861	-0.0382372	0.952155	684.703	0.0637555	0.999918	776.542	0.0283354	0.969282
ENSG00000076554	TPD52	protein_coding	135.779	0.0666675	1	114.292	-0.435528	0.455422	74.7593	0.142436	0.999918	45.4834	0.287131	1
ENSG00000076555	ACACB	protein_coding	122.057	-0.255443	1	127.519	-0.238587	0.74026	24.1423	0.894804	0.999918	18.3536	-0.587623	1
ENSG00000076604	TRAF4	protein_coding	564.046	0.18927	0.565354	582.021	0.102291	0.839802	680.888	-0.19593	0.999918	636.455	-0.192826	0.557871
ENSG00000076641	PAG1	protein_coding	134.667	-0.570507	1	101.694	-0.713549	0.197108	316.152	0.318073	0.999918	350.052	-0.186122	1
ENSG00000076650	GPATCH1	protein_coding	132.496	0.0952054	1	163.982	0.00947763	0.993141	169.22	-0.0537728	0.999918	187.32	0.0779629	1
ENSG00000076662	ICAM3	protein_coding	11.7106	-0.0608606	1	13.3241	0.593801	1	2.63046	1.43635	0.999918	1.67616	1.63047	1
ENSG00000076685	NT5C2	protein_coding	654.329	0.0936956	0.829957	608.904	-0.0202433	0.973964	1725.39	-0.0520831	0.999918	1807.87	0.00702777	0.987888
ENSG00000076706	MCAM	protein_coding	86.2999	-0.0648162	1	298.09	-0.188607	0.742095	24.8884	-0.0109907	0.999918	29.5999	-0.623172	1
ENSG00000076716	GPC4	protein_coding	305.105	0.038074	0.957377	133.527	-0.374261	0.570508	45.0345	1.07961	0.999918	54.0774	1.00703	1
ENSG00000076770	MBNL3	protein_coding	136.752	-0.12795	1	63.5567	-0.818406	1	16.6142	1.30773	0.999918	10.7141	1.08993	1
ENSG00000076826	CAMSAP3	protein_coding	85.2225	-0.550157	1	76.9687	-0.427492	1	391.286	-0.390178	0.999918	293.349	-0.698899	1
ENSG00000076864	RAP1GAP	protein_coding	51.717	-0.278336	1	62.6785	-0.924651	1	37.1311	-0.178019	0.999918	32.0771	-0.471278	1
ENSG00000076924	XAB2	protein_coding	322.86	-0.0640038	0.900035	370.706	0.0346123	0.96323	222.629	-0.152048	0.999918	251.321	-0.265019	1
ENSG00000076928	ARHGEF1	protein_coding	69.1497	0.286212	1	78.301	0.0762942	1	30.8554	-0.123289	0.999918	34.4234	-0.381943	1
ENSG00000076944	STXBP2	protein_coding	11.3938	1.11337	1	14.5469	0.40611	1	12.5579	0.222622	0.999918	12.8203	0.392427	1
ENSG00000076984	MAP2K7	protein_coding	112.049	0.0322537	1	132.957	0.100941	0.912601	130.9	0.0498244	0.999918	129.73	-0.46021	1
ENSG00000077009	NMRK2	protein_coding	5.92023	-1.2064	1	0.658503	1.31583	1	1.29089	2.8739	0.999918	1.14406	-0.699076	1
ENSG00000077044	DGKD	protein_coding	244.427	-0.223645	0.60999	212.618	-0.262657	0.609969	428.167	-0.321728	0.999918	325.853	-0.394656	1
ENSG00000077063	CTTNBP2	protein_coding	271.713	-0.311129	0.483798	257.857	-0.286292	0.524831	773.451	-0.288368	0.999918	519.728	-0.0583678	1
ENSG00000077080	ACTL6B	protein_coding	57.6883	-0.952881	1	49.3564	-1.18598	1	958.357	-0.295464	0.999918	798.009	-0.266886	0.291569
ENSG00000077092	RARB	protein_coding	18.3043	-0.475843	1	6.12686	0.353869	1	28.3273	0.163945	0.999918	5.16097	0.410933	1
ENSG00000077097	TOP2B	protein_coding	4979.87	-0.208575	0.370677	4956.24	-0.0496381	0.903299	6314.71	-0.0587315	0.999918	5585.76	0.1012	0.581971
ENSG00000077147	TM9SF3	protein_coding	1932.88	-0.0351445	0.932845	2744.43	0.0251547	0.960517	1518.03	0.0183717	0.999918	1612.82	0.129972	0.605677
ENSG00000077150	NFKB2	protein_coding	83.6923	-0.236949	1	93.0703	0.104028	1	9.23646	0.43158	0.999918	8.9711	0.350819	1
ENSG00000077152	UBE2T	protein_coding	462.368	0.560051	0.0287695	425.972	0.422189	0.163964	118.188	0.0949246	0.999918	120.145	-0.143032	1
ENSG00000077157	PPP1R12B	protein_coding	277.533	-0.311991	0.406917	343.353	-0.130757	0.831401	550.765	-0.0868558	0.999918	543.135	-0.0421693	1
ENSG00000077232	DNAJC10	protein_coding	2408.6	-0.00205253	0.995848	2942.59	-0.0760773	0.834264	817.049	-0.10624	0.999918	932.357	0.0802063	0.881972
ENSG00000077235	GTF3C1	protein_coding	1133.33	-0.239363	0.336536	1182.18	-0.14006	0.67724	1191.75	-0.0543095	0.999918	1246.66	-0.182537	0.45097
ENSG00000077238	IL4R	protein_coding	15.5508	0.791353	1	17.1664	0.91967	1	5.75861	0.351192	0.999918	4.79934	1.90607	1
ENSG00000077254	USP33	protein_coding	1420.32	-0.027883	0.939078	1665.84	0.0602717	0.887589	1840.36	-0.0718981	0.999918	1760.66	0.00246581	0.993719
ENSG00000077264	PAK3	protein_coding	894.927	-0.822545	0.184188	741.227	-0.303915	0.257368	4491.9	-0.123542	0.999918	4012.82	0.0357476	0.921107
ENSG00000077274	CAPN6	protein_coding	274.67	0.443305	0.250185	1038.44	0.34522	0.883149	16.2377	2.03683	0.999918	76.8434	1.61159	1
ENSG00000077279	DCX	protein_coding	2398.2	-0.87531	0.18175	2831.2	-0.541001	0.00159867	14991.7	-0.0648872	0.999918	13625	0.0101603	0.980142
ENSG00000077312	SNRPA	protein_coding	607.764	0.126075	0.752258	582.034	-0.274399	0.415662	225.95	-0.0266386	0.999918	277.077	-0.191023	1
ENSG00000077327	SPAG6	protein_coding	14.7038	-0.446839	1	21.8485	-0.33326	1	26.1967	-0.221587	0.999918	32.2035	-0.812679	1
ENSG00000077348	EXOSC5	protein_coding	92.5476	0.323604	1	81.6548	0.128357	1	33.3428	-0.123606	0.999918	33.5178	-0.227105	1
ENSG00000077380	DYNC1I2	protein_coding	1524.22	0.0619723	0.857914	1768.59	0.0975521	0.791095	1659.86	-0.114695	0.999918	1935.35	0.101975	0.696083
ENSG00000077420	APBB1IP	protein_coding	0	0	1	0.153789	-0.81843	1	2.73084	1.6961	0.999918	0.654155	0.111078	1
ENSG00000077454	LRCH4	protein_coding	24.3646	-0.226112	1	41.6288	-0.309496	1	26.7017	-0.0674046	0.999918	28.6899	-1.03321	1
ENSG00000077458	FAM76B	protein_coding	481.162	0.0219627	0.967837	577.526	0.0928925	0.856626	729.46	0.0931981	0.999918	833.948	0.303796	0.179087
ENSG00000077463	SIRT6	protein_coding	102.138	0.01539	1	106.512	0.134238	0.886771	86.3231	-0.268436	0.999918	72.7221	-0.494697	1
ENSG00000077498	TYR	protein_coding	0.453443	-0.651934	1	0	0	1	2.34069	0.42866	0.999918	1.75784	2.339	1
ENSG00000077514	POLD3	protein_coding	750.307	0.0852854	0.823345	807.873	0.0388116	0.942161	204.262	0.19095	0.999918	197.009	-0.0271085	1
ENSG00000077522	ACTN2	protein_coding	14.4087	-0.192352	1	10.4849	-0.397788	1	19.5594	0.55516	0.999918	16.2004	0.696126	1
ENSG00000077549	CAPZB	protein_coding	554.368	0.127095	0.745713	476.545	0.0716209	0.893739	640.367	0.00442485	0.999918	630.997	0.052939	1
ENSG00000077585	GPR137B	protein_coding	105.014	-0.193129	1	118.129	-0.00300204	0.999467	77.4665	-0.0149784	0.999918	83.0438	0.127056	1
ENSG00000077616	NAALAD2	protein_coding	481.632	0.309464	0.304819	1254.36	0.0562183	0.893931	50.421	-0.133766	0.999918	136.381	0.105845	1
ENSG00000077684	JADE1	protein_coding	687.436	0.0187587	0.967973	432.939	-0.0407026	0.950289	181.37	0.576376	0.999918	136.336	0.0509221	1
ENSG00000077713	SLC25A43	protein_coding	20.2734	0.40125	1	12.0833	0.0337927	1	5.80758	1.76831	0.999918	4.12883	0.167692	1
ENSG00000077721	UBE2A	protein_coding	316.192	-0.0513108	0.924504	310.701	-0.0182214	0.98165	404.936	-0.0735512	0.999918	349.343	-0.0050349	1
ENSG00000077782	FGFR1	protein_coding	1198.72	0.0570224	0.884651	1540.09	0.0216053	0.967363	638.445	0.329674	0.999918	406.759	-0.246117	1
ENSG00000077800	FKBP6	protein_coding	0.321982	-1.47213	1	0	0	1	1.20013	-0.154989	0.999918	1.68439	1.52352	1
ENSG00000077935	SMC1B	protein_coding	0.590994	-1.05544	1	2.60511	-2.38109	1	8.03897	0.520263	0.999918	4.34481	1.8319	1
ENSG00000077942	FBLN1	protein_coding	474.052	-0.666946	0.547754	764.419	0.0916566	0.840128	150.2	0.363406	0.999918	312.248	-0.129788	1
ENSG00000077943	ITGA8	protein_coding	3.97676	-1.00768	1	0.160128	-0.818939	1	12.6284	0.616785	0.999918	5.25712	1.15642	1
ENSG00000077984	CST7	protein_coding	0	0	1	0	0	1	0.257852	1.32497	0.999918	0.710149	1.01193	1
ENSG00000078018	MAP2	protein_coding	7094.5	-0.542794	0.0120453	6396.25	-0.470614	0.00387043	28198.4	-0.206179	0.999918	28910.4	0.104229	0.523705
ENSG00000078043	PIAS2	protein_coding	531.078	-0.0740863	0.866553	578.614	-0.166902	0.685101	486.58	0.156475	0.999918	456.02	0.12422	1
ENSG00000078053	AMPH	protein_coding	288.993	-0.341253	0.399165	196.257	-0.357984	0.441405	748.775	-0.0112878	0.999918	907.691	0.0104225	0.984968
ENSG00000078061	ARAF	protein_coding	192.41	-0.028846	1	204.631	-0.0856977	0.903299	119.637	0.156894	0.999918	133.184	0.0872737	1
ENSG00000078070	MCCC1	protein_coding	268.257	-0.057747	0.917439	337.456	-0.0914061	0.877791	242.425	-0.168698	0.999918	253.194	-0.264406	1
ENSG00000078081	LAMP3	protein_coding	1.16612	-1.73269	1	1.00453	0.406974	1	5.46642	0.579264	0.999918	7.20271	0.602566	1
ENSG00000078098	FAP	protein_coding	10.3154	0.36023	1	0.161036	0.936026	1	4.84813	1.42446	0.999918	1.91127	1.19968	1
ENSG00000078114	NEBL	protein_coding	693.573	0.396112	0.325537	1110.46	0.0310021	0.953342	1052.27	0.343704	0.999918	1351.61	0.160122	0.545088
ENSG00000078124	ACER3	protein_coding	432.007	-0.168932	0.661549	460.031	0.00803895	0.990041	246.492	-0.280658	0.999918	233.379	0.150315	1
ENSG00000078140	UBE2K	protein_coding	651.085	0.0922454	0.809544	826.051	0.088012	0.852668	820.486	-0.0274462	0.999918	850.064	0.204671	0.454275
ENSG00000078142	PIK3C3	protein_coding	907.421	-0.204996	0.464964	1211.74	-0.0277159	0.958374	830.596	-0.0595205	0.999918	1064.95	-0.0139589	0.980715
ENSG00000078177	N4BP2	protein_coding	1807.47	-0.168985	0.510816	2034.16	-0.0818142	0.821376	1588.14	-0.136083	0.999918	3083.03	-0.0760694	0.760073
ENSG00000078237	TIGAR	protein_coding	130.981	0.655554	1	177.225	0.627765	0.181499	91.2403	0.214102	0.999918	82.4786	-0.0797956	1
ENSG00000078246	TULP3	protein_coding	314.568	-0.227635	0.56536	320.244	-0.088384	0.883149	412.594	0.0449915	0.999918	318.139	0.220968	1
ENSG00000078269	SYNJ2	protein_coding	46.4271	0.532489	1	41.1211	0.503954	1	12.71	1.58893	0.999918	10.3761	-0.114372	1
ENSG00000078295	ADCY2	protein_coding	247.404	-0.80733	0.433636	14.1839	-0.488071	1	391.077	0.118325	0.999918	169.652	-0.0573615	1
ENSG00000078304	PPP2R5C	protein_coding	1713.78	0.0943443	0.756045	1919.83	0.118042	0.718696	1526.04	-0.0669403	0.999918	1516.81	-0.0365646	0.940086
ENSG00000078319	PMS2P1	unprocessed_pseudogene	110.881	0.301886	1	102.467	0.465622	0.429784	61.0421	-0.366444	0.999918	53.8043	-0.137626	1
ENSG00000078328	RBFOX1	protein_coding	3.31141	0.410709	1	8.90774	-0.321305	1	488.253	0.101612	0.999918	82.4739	0.350509	1
ENSG00000078369	GNB1	protein_coding	2086.02	0.00301005	0.994875	2023.72	-0.0161746	0.974563	3157.31	-0.0117586	0.999918	3263.89	-0.0898774	0.704862
ENSG00000078399	HOXA9	protein_coding	0	0	1	0	0	1	3.24544	4.85708	0.999918	1.99891	2.04794	1
ENSG00000078401	EDN1	protein_coding	6.63185	0.389024	1	6.20262	-0.0541478	1	11.1357	-0.108521	0.999918	18.4633	0.495144	1
ENSG00000078403	MLLT10	protein_coding	894.9	0.0120191	0.978071	1043.78	0.0564822	0.898023	771.858	-0.0555122	0.999918	792.951	0.0202063	0.977638
ENSG00000078487	ZCWPW1	protein_coding	20.2642	-0.366311	1	24.4388	0.151726	1	17.5904	0.546204	0.999918	23.9404	0.408407	1
ENSG00000078549	ADCYAP1R1	protein_coding	90.0979	-0.657184	1	237.417	-0.493066	0.331971	193.267	-0.450749	0.999918	106.874	-0.409521	1
ENSG00000078579	FGF20	protein_coding	0.170731	1.09311	1	0.161036	0.936026	1	3.44876	0.566688	0.999918	2.46881	2.69435	1
ENSG00000078589	P2RY10	protein_coding	0.175509	1.1014	1	0.153789	-0.81843	1	0.45039	0.215803	0.999918	0.286166	1.54917	1
ENSG00000078596	ITM2A	protein_coding	15.0415	-0.353588	1	17.4494	-0.267723	1	1.91455	3.67357	0.999918	1.0837	-0.948736	1
ENSG00000078618	NRDC	protein_coding	947.014	0.203346	0.490416	1057.82	0.10825	0.790218	609.789	-0.0105087	0.999918	710.584	0.0515231	0.935388
ENSG00000078668	VDAC3	protein_coding	900.981	0.467584	0.0299176	986.95	0.401322	0.0987709	580.065	-0.0470467	0.999918	577.691	0.0620024	1
ENSG00000078674	PCM1	protein_coding	4254.59	-0.0973543	0.725906	4437.84	-0.0309843	0.942161	4574	0.00135666	0.999918	4740.2	0.202173	0.166488
ENSG00000078687	TNRC6C	protein_coding	298.599	-0.232501	0.575165	239.501	-0.186038	0.791095	1366.41	-0.148138	0.999918	1590.4	-0.114802	0.687354
ENSG00000078699	CBFA2T2	protein_coding	420.852	-0.239694	0.521349	390.844	-0.0669663	0.912967	414.817	-0.16272	0.999918	339.596	-0.108903	1
ENSG00000078725	BRINP1	protein_coding	35.3607	-0.483813	1	36.6357	-1.89312	1	1266.09	-0.122647	0.999918	1100.69	-0.0829839	0.844132
ENSG00000078747	ITCH	protein_coding	940.423	-0.0880048	0.816946	1124.66	0.119718	0.738446	967.047	-0.149138	0.999918	1037.42	0.0173033	0.978411
ENSG00000078795	PKD2L2	protein_coding	0.18443	-0.692072	1	0.153789	-0.81843	1	0.954499	0.828485	0.999918	2.19429	-0.0768678	1
ENSG00000078804	TP53INP2	protein_coding	54.5841	-0.890801	1	54.9784	-0.981129	1	319.772	0.0403782	0.999918	313.958	-0.0155686	1
ENSG00000078808	SDF4	protein_coding	226.182	0.177653	0.723801	238.317	0.0272779	0.973731	213.943	-0.0626401	0.999918	209.321	-0.303027	1
ENSG00000078814	MYH7B	protein_coding	3.78892	0.853135	1	5.1104	-0.613095	1	4.77559	0.113469	0.999918	6.17767	1.68361	1
ENSG00000078898	BPIFB2	protein_coding	0.175509	1.1014	1	0.161036	0.936026	1	2.90809	1.82594	0.999918	1.68267	-0.702896	1
ENSG00000078900	TP73	protein_coding	2.70352	-0.869217	1	1.64027	0.596633	1	13.6483	2.45163	0.999918	5.51998	0.393248	1
ENSG00000078902	TOLLIP	protein_coding	130.259	0.0652377	1	147.805	0.127514	0.87775	209.248	0.0266517	0.999918	178.277	-0.335487	1
ENSG00000078967	UBE2D4	protein_coding	117.051	-0.149193	1	117.753	-0.194892	0.819785	189.011	-0.0362491	0.999918	182.708	0.0116938	1
ENSG00000079101	CLUL1	protein_coding	3.19877	-0.0986829	1	2.01774	0.919781	1	14.0003	-0.137934	0.999918	17.1985	0.735562	1
ENSG00000079102	RUNX1T1	protein_coding	112.701	-1.32058	1	77.5939	-0.903449	1	1156.97	0.37926	0.999918	1087.87	-0.382676	0.721336
ENSG00000079112	CDH17	protein_coding	0.372927	0.200628	1	0.648594	-0.464194	1	3.2293	1.48569	0.999918	2.57858	1.91512	1
ENSG00000079134	THOC1	protein_coding	543.708	0.10902	0.782709	566.494	0.198257	0.636343	274.776	-0.035076	0.999918	340.564	0.210625	1
ENSG00000079150	FKBP7	protein_coding	167.199	0.303851	1	271.12	0.188178	0.723422	197.017	0.0448174	0.999918	313.295	0.240212	1
ENSG00000079156	OSBPL6	protein_coding	172.939	0.519636	1	62.8746	-0.141633	1	319.175	0.301646	0.999918	258.263	-0.141919	1
ENSG00000079215	SLC1A3	protein_coding	397.297	-0.0187911	0.980464	189.902	0.321555	0.88966	12.4808	-0.0377797	0.999918	27.9002	0.666358	1
ENSG00000079246	XRCC5	protein_coding	8666.61	0.212132	0.390747	8964.67	0.193616	0.514407	4966.64	0.0111463	0.999918	5198.96	0.0181161	0.963449
ENSG00000079257	LXN	protein_coding	33.2652	0.658633	1	77.1522	0.538587	1	8.03624	1.23888	0.999918	12.0547	-0.453677	1
ENSG00000079263	SP140	protein_coding	1.10016	0.298711	1	2.81044	-1.232	1	5.80009	-0.567047	0.999918	5.89914	2.34352	1
ENSG00000079277	MKNK1	protein_coding	63.8559	-0.043759	1	77.4766	0.0857101	1	54.5009	0.307363	0.999918	48.7934	-0.321109	1
ENSG00000079308	TNS1	protein_coding	22.6609	-0.609794	1	40.1836	-0.677189	1	146.586	0.0430761	0.999918	76.0258	0.123613	1
ENSG00000079313	REXO1	protein_coding	124.535	-0.0774016	1	113.045	0.0102591	0.994321	146.224	-0.0337433	0.999918	108.094	-0.184239	1
ENSG00000079332	SAR1A	protein_coding	1326.16	0.120183	0.706719	1719.44	0.174059	0.60266	1324.55	0.0451985	0.999918	1509.53	0.116609	0.67012
ENSG00000079335	CDC14A	protein_coding	203.96	-0.168706	0.748444	214.633	0.105015	0.878832	76.2132	0.140119	0.999918	101.561	0.112811	1
ENSG00000079337	RAPGEF3	protein_coding	7.60003	0.287442	1	7.12949	0.272796	1	9.39976	0.191813	0.999918	5.78424	0.562058	1
ENSG00000079385	CEACAM1	protein_coding	0.351018	1.51159	1	0	0	1	2.63352	1.35907	0.999918	0.778216	2.2266	1
ENSG00000079387	SENP1	protein_coding	542.637	0.120933	0.750996	716.823	0.08951	0.839916	602.819	0.00199767	0.999918	707.376	0.0279585	0.969282
ENSG00000079393	DUSP13	protein_coding	0.702518	-0.991256	1	0.330338	0.0463128	1	1.71386	1.03222	0.999918	1.52754	0.228511	1
ENSG00000079432	CIC	protein_coding	222.701	-0.612569	0.0904518	214.509	-0.275656	0.594359	515.529	-0.123462	0.999918	497.481	-0.350314	1
ENSG00000079435	LIPE	protein_coding	35.4336	-0.0654517	1	36.7767	0.145822	1	36.5405	0.121912	0.999918	32.3668	-0.374913	1
ENSG00000079459	FDFT1	protein_coding	3544.05	0.257242	0.2436	3866.09	0.116324	0.715574	2916.9	0.000145354	0.999918	3050.61	0.0478991	0.916196
ENSG00000079462	PAFAH1B3	protein_coding	513.071	0.0342005	0.94673	496.237	0.0174677	0.980957	1260.58	-0.156176	0.999918	1397.56	-0.164658	0.490235
ENSG00000079482	OPHN1	protein_coding	247.068	-0.470122	0.204239	169.681	-0.316053	0.565484	236.482	-0.0353471	0.999918	111.182	0.0899868	1
ENSG00000079557	AFM	protein_coding	0	0	1	0.322071	1.33795	1	2.15287	-1.03768	0.999918	0.852573	-0.207655	1
ENSG00000079616	KIF22	protein_coding	888.501	0.0514459	0.897804	918.035	-0.0139728	0.981179	185.438	0.254931	0.999918	218.746	-0.0780108	1
ENSG00000079689	SCGN	protein_coding	38.4404	-0.253116	1	2.4604	0.215182	1	581.84	-1.25464	0.999918	13.628	1.14974	1
ENSG00000079691	CARMIL1	protein_coding	270.025	-0.441828	0.207169	57.1104	-0.191251	1	226.941	-0.378485	0.999918	81.3103	-0.0729424	1
ENSG00000079739	PGM1	protein_coding	317.185	-0.121177	0.834734	198.972	-0.646882	0.10856	40.0283	0.945198	0.999918	37.346	0.307343	1
ENSG00000079785	DDX1	protein_coding	1456.89	0.22158	0.365417	1538.68	0.229944	0.439595	809.792	-0.0492041	0.999918	906.471	0.086409	0.844822
ENSG00000079805	DNM2	protein_coding	408.014	0.0547046	0.909518	451.266	0.0728686	0.896263	335.147	-0.115394	0.999918	373.605	-0.141831	1
ENSG00000079819	EPB41L2	protein_coding	366.959	0.219848	0.604521	269.505	0.0111593	0.988977	111.975	0.535169	0.999918	69.628	0.0466727	1
ENSG00000079841	RIMS1	protein_coding	575.113	0.0627277	0.911729	433.839	0.113173	0.827941	1655.1	0.0338759	0.999918	1162.93	0.209114	0.357512
ENSG00000079931	MOXD1	protein_coding	247.116	-0.386501	0.299121	462.076	0.344641	0.804708	48.0002	0.0595966	0.999918	162.166	0.108802	1
ENSG00000079950	STX7	protein_coding	977.809	-0.102475	0.756045	1586.96	0.0861139	0.822859	1588.38	-0.0568009	0.999918	1638.75	0.0383738	0.935388
ENSG00000079974	RABL2B	protein_coding	142.929	0.15776	1	129.315	0.34054	0.570833	166.576	0.0344354	0.999918	150.6	-0.31588	1
ENSG00000079999	KEAP1	protein_coding	272.806	-0.0477144	0.931956	315.219	-0.00636267	0.995032	153.847	-0.0260789	0.999918	173.376	-0.169011	1
ENSG00000080007	DDX43	protein_coding	0.170731	1.09311	1	0	0	1	1.10757	1.27358	0.999918	2.96111	4.35949	1
ENSG00000080031	PTPRH	protein_coding	23.2951	-1.35733	1	37.7048	-1.09727	1	24.7044	0.42898	0.999918	31.6418	-0.177866	1
ENSG00000080166	DCT	protein_coding	543.855	-0.248317	0.607495	1071.56	0.459521	0.746811	11.655	1.12556	0.999918	9.42599	1.56052	1
ENSG00000080189	SLC35C2	protein_coding	256.225	-0.0361282	0.9535	264.421	-0.0946163	0.883149	202.142	-0.170723	0.999918	194.017	-0.400002	1
ENSG00000080200	CRYBG3	protein_coding	639.325	-0.31655	0.411006	920.859	-0.0587389	0.901662	66.4477	0.0738581	0.999918	105.672	0.119599	1
ENSG00000080224	EPHA6	protein_coding	6.69274	-0.302961	1	5.99136	-0.404034	1	29.0246	-0.523747	0.999918	43.1057	-0.179004	1
ENSG00000080293	SCTR	protein_coding	0	0	1	0	0	1	0	0	1	0.762792	2.27971	1
ENSG00000080298	RFX3	protein_coding	1631.23	-0.187363	0.447544	2811.49	0.00196048	0.998512	917.592	0.145404	0.999918	1249.36	0.131164	0.661032
ENSG00000080345	RIF1	protein_coding	3272.52	-0.0998352	0.750996	3403.8	-0.0636133	0.878775	1484.33	0.0451263	0.999918	1889.88	0.136247	0.541454
ENSG00000080371	RAB21	protein_coding	740.078	-0.0345475	0.9377	850.739	0.0415074	0.936012	855.512	0.0957573	0.999918	1014.31	0.0426222	0.938887
ENSG00000080493	SLC4A4	protein_coding	64.2839	-0.284758	1	173.781	-0.18483	0.774086	39.2943	0.34799	0.999918	14.8303	0.341302	1
ENSG00000080503	SMARCA2	protein_coding	188.437	-0.0674316	1	142.167	-0.0829097	0.923681	197.275	0.290228	0.999918	119.93	0.261783	1
ENSG00000080511	RDH8	protein_coding	0.188496	1.07965	1	0.170209	0.952709	1	1.68035	0.609989	0.999918	0.87818	2.256	1
ENSG00000080546	SESN1	protein_coding	655.164	0.558437	0.0715272	774.604	0.547831	0.446344	214.608	0.0880572	0.999918	218.644	0.155284	1
ENSG00000080561	MID2	protein_coding	15.3386	-0.482772	1	9.3577	-0.298692	1	49.7915	-0.0397309	0.999918	32.3695	0.109316	1
ENSG00000080572	PIH1D3	protein_coding	3.3064	0.165809	1	4.33335	0.929918	1	1.12182	1.10783	0.999918	1.21233	0.93281	1
ENSG00000080573	COL5A3	protein_coding	5.06359	0.74606	1	3.76103	-0.542925	1	11.2571	0.480715	0.999918	10.5403	1.03804	1
ENSG00000080603	SRCAP	protein_coding	20.6707	0.239353	1	15.3725	-0.476675	1	22.2362	0.39517	0.999918	21.8256	-0.407616	1
ENSG00000080608	PUM3	protein_coding	357.454	0.327954	0.321574	386.195	0.29256	0.448979	226.932	0.288663	0.999918	215.46	0.250788	1
ENSG00000080618	CPB2	protein_coding	0	0	1	0.160128	-0.818939	1	1.8201	3.26445	0.999918	1.30995	3.19216	1
ENSG00000080644	CHRNA3	protein_coding	69.7244	-0.348495	1	26.3136	0.589091	1	34.7316	0.578546	0.999918	28.7433	0.839752	1
ENSG00000080709	KCNN2	protein_coding	22.7768	-0.0450769	1	25.0934	0.505089	1	33.6414	-0.313194	0.999918	22.9784	0.789662	1
ENSG00000080802	CNOT4	protein_coding	383.119	-0.311016	0.33251	374.519	-0.146472	0.772536	814.059	-0.119517	0.999918	917.597	0.0208074	0.974263
ENSG00000080815	PSEN1	protein_coding	887.054	-0.01762	0.967837	1154.34	0.000506311	0.999966	843.291	0.109651	0.999918	942.77	0.0131788	0.983582
ENSG00000080819	CPOX	protein_coding	188.144	0.183928	1	218.95	-0.0246167	0.978847	67.9083	-0.283662	0.999918	62.2371	0.0869524	1
ENSG00000080822	CLDND1	protein_coding	635.602	0.133424	0.714143	754.036	0.0789376	0.867754	802.728	0.0690349	0.999918	955.147	0.0457206	0.935388
ENSG00000080823	MOK	protein_coding	148.486	-0.278105	1	173.22	0.0664574	0.939812	315.11	-0.0684915	0.999918	255.047	-0.152021	1
ENSG00000080824	HSP90AA1	protein_coding	6131.41	0.658785	0.000409851	6788.39	0.480522	0.021167	3852.05	0.121162	0.999918	3916.87	0.117292	0.591614
ENSG00000080839	RBL1	protein_coding	402.023	0.0708729	0.88202	423.502	0.0428543	0.948052	170.701	-0.274063	0.999918	198.769	-0.0138306	1
ENSG00000080845	DLGAP4	protein_coding	378.751	-0.223884	0.552217	435.504	-0.268572	0.438357	1121.91	-0.156388	0.999918	1187.21	-0.260794	0.216589
ENSG00000080854	IGSF9B	protein_coding	31.6215	0.254684	1	35.2445	-0.262464	1	38.9423	-0.155088	0.999918	43.7868	-0.115031	1
ENSG00000080910	CFHR2	protein_coding	0	0	1	0	0	1	0	0	1	0	0	1
ENSG00000080947	CROCCP3	transcribed_unprocessed_pseudogene	139.354	-0.330462	1	172.864	-0.0781338	0.924799	104.632	-0.174043	0.999918	127.467	-0.122187	1
ENSG00000080986	NDC80	protein_coding	664.077	0.325911	0.211069	704.494	0.367635	0.184971	25.0973	1.13441	0.999918	37.2997	1.08969	1
ENSG00000081014	AP4E1	protein_coding	241.17	-0.149343	0.775298	281.147	-0.0203599	0.980957	144.863	-0.0906142	0.999918	180.771	0.193307	1
ENSG00000081019	RSBN1	protein_coding	905.791	-0.246385	0.379772	1075.96	-0.304575	0.225406	1345.57	-0.118438	0.999918	1322.18	-0.00684638	0.987888
ENSG00000081026	MAGI3	protein_coding	550.065	-0.442895	0.0825306	579.407	-0.377332	0.180941	684.826	0.0308744	0.999918	341.811	-0.0268346	1
ENSG00000081041	CXCL2	protein_coding	0.346241	1.88913	1	0.831236	0.415659	1	0	0	1	0.165014	1.50479	1
ENSG00000081051	AFP	protein_coding	12.0614	-3.41587	1	7.68208	-1.00799	1	6.80297	-0.667547	0.999918	2.65217	2.8405	1
ENSG00000081052	COL4A4	protein_coding	0.882882	-2.25678	1	2.54642	-0.728173	1	12.5383	0.348161	0.999918	4.06834	1.46021	1
ENSG00000081059	TCF7	protein_coding	30.8883	-0.253575	1	24.4828	-0.181929	1	23.9352	0.0519361	0.999918	25.7564	0.0470204	1
ENSG00000081087	OSTM1	protein_coding	306.528	0.13857	0.767023	458.234	0.414124	0.152124	498.262	0.0260392	0.999918	493.759	0.0824256	1
ENSG00000081138	CDH7	protein_coding	103.149	-0.591789	1	106.515	0.253748	0.797023	439.364	-0.125897	0.999918	1255.75	0.134089	0.633253
ENSG00000081148	IMPG2	protein_coding	46.8525	-0.491965	1	62.7126	-0.026818	1	199.477	-0.109849	0.999918	232.29	-0.000487241	1
ENSG00000081154	PCNP	protein_coding	1219.5	0.124283	0.714018	1413.06	0.113324	0.749001	847.349	-0.102142	0.999918	1101.54	0.140143	0.641233
ENSG00000081177	EXD2	protein_coding	315.677	-0.265803	0.477673	363.158	0.0282915	0.968827	366.351	-0.16538	0.999918	384.193	-0.239024	1
ENSG00000081181	ARG2	protein_coding	302.357	0.46436	0.15413	239.446	0.381833	0.350166	877.981	-0.0240443	0.999918	820.82	0.09373	0.845704
ENSG00000081189	MEF2C	protein_coding	94.764	-0.167131	1	209.156	-0.214023	0.722284	1138.26	-0.172098	0.999918	1153.13	-0.297514	0.185965
ENSG00000081237	PTPRC	protein_coding	2.65468	1.09807	1	1.16822	2.00768	1	10.4146	1.51693	0.999918	3.16353	0.535043	1
ENSG00000081248	CACNA1S	protein_coding	1.48017	-1.34622	1	0.976161	1.76167	1	8.03635	0.967235	0.999918	2.91604	0.538926	1
ENSG00000081277	PKP1	protein_coding	0	0	1	0.176303	0.95217	1	3.89232	0.733963	0.999918	1.92129	1.26194	1
ENSG00000081307	UBA5	protein_coding	508.383	-0.0714978	0.877472	537.187	-0.086853	0.863941	266.894	-0.149631	0.999918	303.353	0.110759	1
ENSG00000081320	STK17B	protein_coding	292.371	0.117238	0.814782	223.019	0.10755	0.87775	13.681	0.54491	0.999918	13.8954	0.727311	1
ENSG00000081377	CDC14B	protein_coding	430.989	0.037289	0.938376	521.761	0.0258276	0.968482	194.297	-0.137118	0.999918	177.421	-0.0356656	1
ENSG00000081386	ZNF510	protein_coding	483.666	-0.107925	0.806235	595.892	0.0328447	0.960517	636.085	-0.249295	0.999918	725.215	-0.0791103	0.881972
ENSG00000081479	LRP2	protein_coding	2121.3	0.802614	0.137226	4505.91	-0.0191927	0.968865	250.731	0.698501	0.999918	279.781	0.309654	1
ENSG00000081665	ZNF506	protein_coding	214.777	0.0677769	0.923377	260.435	0.248209	0.602701	525.637	-0.108767	0.999918	577.821	0.201959	1
ENSG00000081692	JMJD4	protein_coding	181.22	-0.0774814	1	195.188	-0.0234322	0.980957	89.6587	0.151279	0.999918	78.8693	-0.587231	1
ENSG00000081721	DUSP12	protein_coding	312.586	0.279127	0.450878	367.56	0.25398	0.511264	353.359	-0.0954291	0.999918	353.836	0.059716	1
ENSG00000081760	AACS	protein_coding	260.102	0.0308664	0.961483	231.246	0.0249722	0.977594	150.465	0.174073	0.999918	114.603	-0.238822	1
ENSG00000081791	KIAA0141	protein_coding	535.847	-0.139136	0.706719	529.944	-0.243685	0.467907	373.36	0.271883	0.999918	369.311	-0.017625	1
ENSG00000081800	SLC13A1	protein_coding	0	0	1	0.170209	0.952709	1	2.42475	1.04815	0.999918	2.73102	2.8174	1
ENSG00000081803	CADPS2	protein_coding	182.147	0.357891	1	422.804	0.0835641	0.883892	171.305	0.575402	0.999918	105.832	-0.417602	1
ENSG00000081818	PCDHB4	protein_coding	41.8285	-0.203121	1	38.4988	-0.220578	1	70.2254	-0.296951	0.999918	75.8072	-0.0281533	1
ENSG00000081842	PCDHA6	protein_coding	59.0757	-0.317466	1	70.0918	-0.31701	1	88.0407	-0.0157728	0.999918	89.9708	-0.187233	1
ENSG00000081853	PCDHGA2	protein_coding	4.97029	-0.121615	1	11.3163	-0.27423	1	16.6283	-0.139678	0.999918	13.3686	-0.880909	1
ENSG00000081870	HSPB11	protein_coding	245.652	0.312878	0.434328	221.358	0.306995	0.530224	110.363	0.100767	0.999918	124.582	0.212087	1
ENSG00000081913	PHLPP1	protein_coding	443.503	-0.303205	0.324666	315.778	-0.366301	0.285695	330.308	-0.0713145	0.999918	303.134	-0.272503	1
ENSG00000081923	ATP8B1	protein_coding	0.97153	-0.923919	1	1.48351	-0.439806	1	4.25697	0.911822	0.999918	5.26849	0.669537	1
ENSG00000081985	IL12RB2	protein_coding	0.170731	1.09311	1	0.333769	0.0565794	1	3.78866	1.00166	0.999918	2.31736	0.97575	1
ENSG00000082014	SMARCD3	protein_coding	308.639	-0.0440015	0.934839	382.657	-0.0783161	0.892395	732.739	-0.279235	0.999918	621.537	-0.237301	1
ENSG00000082068	WDR70	protein_coding	480.431	0.228255	0.487711	536.824	0.310851	0.287581	347.554	0.00388173	0.999918	350.942	0.0431168	1
ENSG00000082074	FYB1	protein_coding	0.14516	-0.677864	1	0.153789	-0.81843	1	1.79006	3.43357	0.999918	0.91485	0.41891	1
ENSG00000082126	MPP4	protein_coding	1.67569	2.43927	1	1.88156	0.804845	1	5.99584	0.802449	0.999918	3.59707	0.192321	1
ENSG00000082146	STRADB	protein_coding	393.136	0.120198	0.786511	403.568	0.0966697	0.856626	366.65	-0.0105116	0.999918	380.084	0.0636455	1
ENSG00000082153	BZW1	protein_coding	1904.1	0.117792	0.695064	2038.34	0.252043	0.417661	1961.55	-0.0822008	0.999918	1709.01	0.0633565	0.855198
ENSG00000082175	PGR	protein_coding	2.12906	-0.895611	1	1.68503	-0.965107	1	33.5694	-0.802275	0.999918	8.42279	1.71246	1
ENSG00000082196	C1QTNF3	protein_coding	28.4522	-0.237748	1	33.6489	-0.335573	1	41.4708	-0.14622	0.999918	40.3876	0.329992	1
ENSG00000082212	ME2	protein_coding	926.183	0.305665	0.217436	1000.27	0.344416	0.185655	734.733	0.0931992	0.999918	782.64	0.0471877	0.93562
ENSG00000082213	C5orf22	protein_coding	539.118	0.00432901	0.994523	669.005	0.167539	0.650792	724.092	0.0131338	0.999918	666.385	0.205825	0.518508
ENSG00000082258	CCNT2	protein_coding	1393.47	-0.00449734	0.991307	1715.86	0.0271754	0.957828	1612.13	-0.0451926	0.999918	1765.92	0.110129	0.668139
ENSG00000082269	FAM135A	protein_coding	653.566	0.0762441	0.862454	876.749	0.151833	0.696065	620.804	-0.0518431	0.999918	536.975	0.00539873	1
ENSG00000082293	COL19A1	protein_coding	1.16003	-0.577869	1	2.56917	-1.87157	1	19.966	1.36871	0.999918	5.39525	1.44593	1
ENSG00000082397	EPB41L3	protein_coding	144.001	-0.850565	1	95.5785	-0.403045	0.564922	572.718	0.0375085	0.999918	636.46	-0.0894495	0.889629
ENSG00000082438	COBLL1	protein_coding	48.3781	0.129426	1	51.8094	-0.160804	1	29.9764	0.234335	0.999918	22.2769	0.343803	1
ENSG00000082458	DLG3	protein_coding	793.285	-0.0229242	0.959881	934.09	0.011532	0.985832	1069.19	-0.0049224	0.999918	1215.75	-0.141459	0.625558
ENSG00000082482	KCNK2	protein_coding	96.9576	0.120463	1	60.3669	-0.0354308	1	97.2414	-0.983865	0.999918	44.7746	0.187085	1
ENSG00000082497	SERTAD4	protein_coding	113.656	-0.573949	1	46.1459	-0.359194	1	389.873	0.7254	0.999918	45.7407	-0.201246	1
ENSG00000082512	TRAF5	protein_coding	52.0712	0.153617	1	25.5711	-0.424766	1	10.1369	-0.13289	0.999918	8.57111	-0.485567	1
ENSG00000082515	MRPL22	protein_coding	168.236	0.55792	1	216.599	0.394871	0.326699	172.069	-0.0159985	0.999918	217.51	0.214467	1
ENSG00000082516	GEMIN5	protein_coding	604.905	-0.016795	0.9725	585.591	-0.141324	0.730259	313.012	0.0563329	0.999918	366.415	-0.0763665	1
ENSG00000082556	OPRK1	protein_coding	18.1643	0.518566	1	3.91522	-1.83916	1	12.854	-0.619041	0.999918	10.8919	0.0638863	1
ENSG00000082641	NFE2L1	protein_coding	1235.41	-0.021692	0.960802	1256.7	-0.161959	0.601738	1233.63	0.0263117	0.999918	1296.32	-0.109353	0.708617
ENSG00000082684	SEMA5B	protein_coding	119.054	0.0281856	1	91.8542	-0.559175	1	74.5924	0.688994	0.999918	40.9608	-0.0445937	1
ENSG00000082701	GSK3B	protein_coding	1283.22	-0.323043	0.163953	1508.34	-0.236178	0.335006	3137.46	-3.09594e-05	0.999918	3815.46	0.0379529	0.92989
ENSG00000082781	ITGB5	protein_coding	185.23	0.839974	1	201.133	0.0359732	0.968827	34.0999	1.66291	0.999918	19.47	0.466774	1
ENSG00000082805	ERC1	protein_coding	523.692	-0.338546	0.24961	572.704	-0.181903	0.651619	996.202	-0.266907	0.999918	930.212	-0.226924	0.402134
ENSG00000082898	XPO1	protein_coding	6737.45	0.125601	0.651104	7935.76	0.123097	0.674049	2183.07	-0.0949395	0.999918	2337.55	-0.062969	0.848369
ENSG00000082929	LINC01587	processed_transcript	0.14516	-0.677864	1	0	0	1	0.306446	0.38489	0.999918	0.60752	1.48655	1
ENSG00000082996	RNF13	protein_coding	301.555	0.123414	0.793462	456.919	0.242482	0.505846	281.579	0.14496	0.999918	355.205	0.257321	1
ENSG00000083067	TRPM3	protein_coding	287.385	-0.245576	0.665902	92.0545	0.207613	1	263.655	-0.0199475	0.999918	37.9159	0.533859	1
ENSG00000083093	PALB2	protein_coding	317.441	0.0678168	0.8972	359.101	0.0436425	0.951246	289.255	-0.186103	0.999918	284.945	-0.181038	1
ENSG00000083097	DOPEY1	protein_coding	791.843	-0.425311	0.0950005	849.29	-0.27806	0.306047	1285.24	-0.170925	0.999918	1224.34	0.0743571	0.85296
ENSG00000083099	LYRM2	protein_coding	534.609	-0.0180839	0.970997	595.265	0.0452316	0.938919	553.525	0.00147451	0.999918	652.89	0.123575	0.759663
ENSG00000083123	BCKDHB	protein_coding	321.271	0.0902973	0.865196	363.213	-0.015651	0.98312	74.9696	0.00758642	0.999918	76.3219	0.14261	1
ENSG00000083168	KAT6A	protein_coding	1324.4	-0.218949	0.38104	1320.6	-0.136596	0.67649	1744.66	-0.179219	0.999918	1981.66	-0.0718537	0.823828
ENSG00000083223	ZCCHC6	protein_coding	506.127	-0.163814	0.68426	544.563	0.0673534	0.895896	717.621	-0.0108205	0.999918	733.147	0.139565	0.694216
ENSG00000083290	ULK2	protein_coding	407.228	-0.330568	0.298533	475.708	-0.257765	0.471933	688.481	-0.152437	0.999918	597.887	-0.215688	1
ENSG00000083307	GRHL2	protein_coding	0.18443	-0.692072	1	0.307578	-1.22246	1	3.78364	1.52202	0.999918	3.16273	4.43812	1
ENSG00000083312	TNPO1	protein_coding	5150.11	-0.135641	0.627941	6078.7	-0.0665323	0.866939	5260.75	-0.0471857	0.999918	6624.89	0.0295398	0.931228
ENSG00000083444	PLOD1	protein_coding	192.122	-0.184898	1	253.483	-0.451827	0.281939	23.4241	0.379762	0.999918	29.2849	-0.107255	1
ENSG00000083454	P2RX5	protein_coding	1.70971	-3.13333	1	3.08866	-0.198978	1	5.0615	0.934893	0.999918	3.83082	-1.07494	1
ENSG00000083457	ITGAE	protein_coding	108.374	0.471287	1	122.679	0.145673	0.864468	38.2712	-0.172909	0.999918	42.6268	0.250328	1
ENSG00000083520	DIS3	protein_coding	883.618	0.0382869	0.924504	1075.19	0.0877814	0.836011	1251.83	-0.0332018	0.999918	1447.47	0.182403	0.409185
ENSG00000083535	PIBF1	protein_coding	494.209	0.171741	0.631404	675.661	0.228898	0.466461	272.955	-0.0184373	0.999918	350.439	0.117902	1
ENSG00000083544	TDRD3	protein_coding	391.158	0.203383	0.601915	407.937	0.110372	0.845589	295.474	-0.144067	0.999918	249.138	0.0673194	1
ENSG00000083622	AC000061.1	antisense_RNA	0	0	1	0	0	1	0.754869	0.937301	0.999918	0	0	1
ENSG00000083635	NUFIP1	protein_coding	110.529	0.173281	1	108.664	0.0384081	0.973205	165.709	0.0694663	0.999918	186.135	-0.0325827	1
ENSG00000083642	PDS5B	protein_coding	835.405	-0.0588944	0.88202	1114.12	-0.0626103	0.893076	1206.17	-0.0875365	0.999918	1423.53	0.0899245	0.775598
ENSG00000083720	OXCT1	protein_coding	618.978	0.113979	0.761877	679.388	0.0671766	0.895183	571.387	-0.0953818	0.999918	552.657	-0.0443582	1
ENSG00000083750	RRAGB	protein_coding	234.224	-0.11379	0.835068	292.358	0.0863555	0.891887	511.002	-0.0559369	0.999918	491.709	-0.116791	1
ENSG00000083782	EPYC	protein_coding	0	0	1	0	0	1	1.43294	0.423769	0.999918	0	0	1
ENSG00000083799	CYLD	protein_coding	320.346	-0.465921	0.144692	392.478	-0.349314	0.291109	708.208	-0.059483	0.999918	631.452	-0.0511498	1
ENSG00000083807	SLC27A5	protein_coding	54.3164	0.486482	1	56.1568	0.136972	1	20.2213	-0.53685	0.999918	16.8132	-0.436971	1
ENSG00000083812	ZNF324	protein_coding	161.22	-0.156218	1	194.127	-0.0768673	0.9183	169.625	-0.329959	0.999918	157.576	-0.442321	1
ENSG00000083814	ZNF671	protein_coding	147.154	-0.235286	1	175.85	0.00652921	0.995817	205.414	-0.199273	0.999918	243.205	-0.0930511	1
ENSG00000083817	ZNF416	protein_coding	120.369	-0.0326671	1	138.381	0.0297528	0.978847	93.9928	0.107021	0.999918	89.1393	-0.562558	1
ENSG00000083828	ZNF586	protein_coding	229.723	-0.199036	0.670797	254.521	0.0273265	0.973205	177.705	-0.178508	0.999918	193.005	-0.081792	1
ENSG00000083838	ZNF446	protein_coding	119.305	-0.222198	1	125.677	-0.306842	0.642998	73.1705	-0.24542	0.999918	61.9375	-0.331014	1
ENSG00000083844	ZNF264	protein_coding	636.941	-0.196172	0.543019	664.743	-0.0453094	0.938893	1047.77	0.0863432	0.999918	1098.76	0.00455059	0.991036
ENSG00000083845	RPS5	protein_coding	4796.03	0.49944	0.0167671	5081.88	0.370144	0.0517248	520.092	0.0713484	0.999918	496.202	-0.181871	1
ENSG00000083857	FAT1	protein_coding	6909.87	-0.106245	0.718989	8932.47	-0.0443888	0.909878	3389.81	0.117736	0.999918	4114.01	0.0853345	0.94795
ENSG00000083896	YTHDC1	protein_coding	1073.72	-0.201861	0.465987	1152.93	-0.050577	0.910138	1348.18	-0.221026	0.999918	1591.8	0.044475	0.922668
ENSG00000083937	CHMP2B	protein_coding	351.481	0.184904	0.681544	481.015	0.345164	0.24541	191.708	0.0408872	0.999918	158.608	0.220375	1
ENSG00000084070	SMAP2	protein_coding	203.368	-0.354962	0.395396	233.275	-0.38615	0.326683	873.671	-0.0711116	0.999918	718.385	-0.284295	0.269322
ENSG00000084072	PPIE	protein_coding	278.21	0.480074	0.161586	315.783	0.155972	0.774361	84.1897	0.0249389	0.999918	99.1548	-0.0172795	1
ENSG00000084073	ZMPSTE24	protein_coding	404.521	0.198875	0.593476	426.637	0.308894	0.526569	350.648	0.0100187	0.999918	375.314	0.122976	1
ENSG00000084090	STARD7	protein_coding	1590.33	0.0844161	0.804434	1679.08	0.0345492	0.941613	1467.66	-0.0293874	0.999918	1516.85	-0.132603	0.614185
ENSG00000084092	NOA1	protein_coding	251.601	0.175133	0.707562	291.669	0.141382	0.80214	240.411	0.0606889	0.999918	232.469	-0.0625985	1
ENSG00000084093	REST	protein_coding	1088.92	-0.0711213	0.864968	1055.7	0.0381271	0.938919	105.893	0.644054	0.999918	88.9698	0.599388	1
ENSG00000084110	HAL	protein_coding	2.55751	-0.937194	1	2.94432	-0.114206	1	2.1493	1.03311	0.999918	4.19201	4.77339	1
ENSG00000084112	SSH1	protein_coding	155.838	-0.1271	1	163.244	-0.167517	0.814521	212.383	-0.31565	0.999918	205.017	-0.186733	1
ENSG00000084207	GSTP1	protein_coding	2171.71	0.513219	0.0083588	1961.05	0.324114	0.129882	756.858	0.808031	0.999918	422.234	-0.0440663	1
ENSG00000084234	APLP2	protein_coding	2264.3	0.134744	0.648667	2671.98	-0.00830151	0.987652	3428.36	-0.0417796	0.999918	3053.18	-0.0861966	0.721336
ENSG00000084444	FAM234B	protein_coding	312.618	-0.00914658	0.988382	245.716	-0.350421	0.381609	642.326	-0.121243	0.999918	469.753	-0.140674	1
ENSG00000084453	SLCO1A2	protein_coding	45.9337	-1.21364	1	84.8717	-1.43787	1	27.3433	-0.950175	0.999918	34.7778	-1.03991	1
ENSG00000084463	WBP11	protein_coding	769.929	-0.216055	0.483798	836.229	-0.221018	0.466827	1374.38	0.0691938	0.999918	1520.27	0.0207903	0.969282
ENSG00000084623	EIF3I	protein_coding	630.936	0.366639	0.245821	605.741	0.235687	0.490122	608.411	-0.120022	0.999918	639.458	-0.101129	0.84596
ENSG00000084628	NKAIN1	protein_coding	539.959	-0.087343	0.833817	413.609	-0.102135	0.846512	2508.42	-0.0468279	0.999918	2235.7	-0.0920069	0.721336
ENSG00000084636	COL16A1	protein_coding	3.80468	-0.955498	1	3.26115	-0.425224	1	14.3639	0.853974	0.999918	8.43622	1.17243	1
ENSG00000084652	TXLNA	protein_coding	832.271	0.0339875	0.933922	877.283	0.0485582	0.9183	667.138	0.119848	0.999918	850.127	-0.201765	0.486348
ENSG00000084674	APOB	protein_coding	5.16346	-1.00178	1	1.94435	-0.604302	1	18.7982	0.465059	0.999918	10.0584	0.87511	1
ENSG00000084676	NCOA1	protein_coding	606.767	-0.449885	0.0973032	659.773	-0.0753426	0.881401	1475.52	-0.14321	0.999918	1254.94	-0.193565	0.421849
ENSG00000084693	AGBL5	protein_coding	622.918	0.0718273	0.865039	628.734	0.125505	0.778824	468.671	0.0947424	0.999918	453.097	-0.222479	1
ENSG00000084710	EFR3B	protein_coding	1041.75	-0.101152	0.761412	866.727	-0.204574	0.507965	1146.19	0.0762252	0.999918	1111.94	-0.113576	0.746316
ENSG00000084731	KIF3C	protein_coding	444.234	-0.60143	0.0432071	412.284	-0.334539	0.333645	2551	-0.198164	0.999918	2287.03	-0.332297	0.0239866
ENSG00000084733	RAB10	protein_coding	1446.72	0.174581	0.530792	1570.16	0.12779	0.746811	1998.01	-0.00253105	0.999918	2028.52	-0.0115578	0.981656
ENSG00000084734	GCKR	protein_coding	1.52686	0.53273	1	1.66927	-1.99077	1	4.69201	-0.46424	0.999918	6.30673	2.17577	1
ENSG00000084754	HADHA	protein_coding	1552.2	0.129136	0.654837	1514.2	0.101097	0.796315	655.395	0.193395	0.999918	966.246	0.0800651	0.849761
ENSG00000084764	MAPRE3	protein_coding	86.0783	-0.50462	1	72.4109	-0.288407	1	443.38	-0.183854	0.999918	363.781	-0.123617	1
ENSG00000084774	CAD	protein_coding	660.975	0.00334619	0.994995	594.95	-0.219936	0.641419	88.2779	0.0691659	0.999918	84.5943	-0.230544	1
ENSG00000085063	CD59	protein_coding	667.836	0.250166	0.386747	742.647	0.258496	0.378559	636.108	0.0071499	0.999918	556.966	-0.0322189	1
ENSG00000085117	CD82	protein_coding	223.593	0.185756	0.707562	151.236	0.187286	0.818041	1.4356	1.40235	0.999918	1.90578	0.694235	1
ENSG00000085185	BCORL1	protein_coding	100.693	-0.413092	1	81.7688	-0.296303	1	83.963	-0.110895	0.999918	93.5148	-0.0637687	1
ENSG00000085224	ATRX	protein_coding	2319.83	-0.167845	0.523263	2662.62	-0.0704184	0.861254	3011.22	-0.1126	0.999918	3105.34	0.219815	0.141825
ENSG00000085231	AK6	protein_coding	173.099	0.378043	1	172.122	0.570981	0.206435	61.3881	-0.219304	0.999918	72.3262	-0.111879	1
ENSG00000085265	FCN1	protein_coding	0.333657	0.194002	1	0	0	1	4.52902	0.18197	0.999918	3.67848	0.458958	1
ENSG00000085274	MYNN	protein_coding	353.802	0.16207	0.714327	426.051	0.19375	0.6706	368.2	-0.0579354	0.999918	378.755	0.307245	1
ENSG00000085276	MECOM	protein_coding	495.651	-0.149754	0.77327	173.436	0.00283962	0.999467	41.9087	1.64872	0.999918	9.88889	1.09293	1
ENSG00000085365	SCAMP1	protein_coding	991.778	0.00901091	0.98505	1146.53	0.0310426	0.952155	1904.34	-0.0328053	0.999918	1652.72	-0.00641493	0.987888
ENSG00000085377	PREP	protein_coding	253.088	0.0860328	0.879894	230.318	0.0226658	0.980957	262.498	0.00988481	0.999918	237.674	0.150862	1
ENSG00000085382	HACE1	protein_coding	641.809	0.0352694	0.939772	710.037	0.145823	0.701596	181.243	0.16081	0.999918	222.884	0.0284216	1
ENSG00000085415	SEH1L	protein_coding	349.665	0.287573	0.440665	372.118	0.254251	0.524404	109.061	0.352596	0.999918	116.547	0.260424	1
ENSG00000085433	WDR47	protein_coding	538.852	-0.377594	0.269589	556.447	-0.206186	0.636581	1499.64	-0.125395	0.999918	1235.56	-0.00556119	0.988397
ENSG00000085449	WDFY1	protein_coding	1182.14	0.141884	0.672407	1269.66	0.0575597	0.898023	1178.73	0.0466527	0.999918	1368.42	0.159401	0.510921
ENSG00000085465	OVGP1	protein_coding	12.0672	-0.292537	1	15.1606	-0.0345991	1	16.7905	-0.602163	0.999918	23.768	0.397253	1
ENSG00000085491	SLC25A24	protein_coding	913.095	0.160128	0.612949	940.355	0.327357	0.228311	387.948	-0.0430855	0.999918	506.476	0.0180573	1
ENSG00000085511	MAP3K4	protein_coding	894.141	0.106055	0.752787	990.327	-0.0156494	0.979086	546.496	0.153802	0.999918	608.387	0.0447911	1
ENSG00000085514	PILRA	protein_coding	8.50279	-0.51173	1	9.63578	0.148972	1	11.3181	0.189154	0.999918	10.9347	-0.694032	1
ENSG00000085552	IGSF9	protein_coding	131.974	-0.339354	1	140.166	-0.430925	0.391736	91.162	0.0871755	0.999918	102.03	-0.638589	1
ENSG00000085563	ABCB1	protein_coding	8.33724	0.0995705	1	3.24469	-0.466475	1	7.97633	1.18584	0.999918	5.74944	1.05911	1
ENSG00000085644	ZNF213	protein_coding	61.6422	-0.24275	1	63.3825	-0.139349	1	124.054	-0.103299	0.999918	133.269	-0.165951	1
ENSG00000085662	AKR1B1	protein_coding	710.958	0.411482	0.0913837	645.751	0.205602	0.535167	200.373	-0.0430837	0.999918	169.273	-0.449899	1
ENSG00000085719	CPNE3	protein_coding	1434.09	-0.0815683	0.828245	1480.19	0.106904	0.765236	684.175	0.080959	0.999918	957.38	0.0725501	0.871747
ENSG00000085721	RRN3	protein_coding	617.951	0.00354342	0.994875	755.171	0.122187	0.796315	572.525	-0.117907	0.999918	620.403	-0.0461668	1
ENSG00000085733	CTTN	protein_coding	728.388	-0.0391388	0.927294	762.77	0.047617	0.924358	798.075	-0.0739821	0.999918	782.558	-0.16265	0.621909
ENSG00000085741	WNT11	protein_coding	1.16652	1.96272	1	0.503979	0.93016	1	3.36543	1.94508	0.999918	1.16399	1.26382	1
ENSG00000085760	MTIF2	protein_coding	389.189	0.347209	0.336536	487.707	0.207285	0.605906	226.51	0.0878617	0.999918	289.508	0.100353	1
ENSG00000085788	DDHD2	protein_coding	1188.32	0.0716482	0.855477	1489.18	-0.0960368	0.797023	966.775	0.0523739	0.999918	1137.21	-0.117472	0.696083
ENSG00000085831	TTC39A	protein_coding	2.84409	-1.41308	1	1.81907	-2.21996	1	17.8597	0.819756	0.999918	12.4604	0.555758	1
ENSG00000085832	EPS15	protein_coding	1022.42	-0.015138	0.974923	1043.73	-0.0685031	0.8802	2338.55	-0.0558418	0.999918	1893.4	0.0010582	0.998304
ENSG00000085840	ORC1	protein_coding	422.855	0.219926	0.525293	387.452	-0.0250028	0.973205	28.7283	0.925679	0.999918	30.2623	0.326529	1
ENSG00000085871	MGST2	protein_coding	38.9761	0.214474	1	30.0245	0.196002	1	7.45852	0.0270896	0.999918	4.20491	0.00562497	1
ENSG00000085872	CHERP	protein_coding	104.044	-0.273273	1	101.632	-0.176117	0.845589	110.68	-0.231972	0.999918	106.194	-0.422473	1
ENSG00000085978	ATG16L1	protein_coding	199.87	-0.0623505	0.920395	254.844	-0.00051476	0.999966	285.915	-0.15274	0.999918	274.546	-0.134935	1
ENSG00000085982	USP40	protein_coding	370.482	-0.141516	0.756045	466.317	-0.136724	0.762778	218.254	0.0609713	0.999918	248.114	-0.0508739	1
ENSG00000085998	POMGNT1	protein_coding	502.024	-0.0509072	0.910622	498.579	0.0217695	0.973731	346.699	0.0148463	0.999918	296.242	-0.295255	1
ENSG00000085999	RAD54L	protein_coding	192.409	0.0466048	1	159.508	-0.325079	0.553042	8.82587	1.21529	0.999918	5.85203	1.0594	1
ENSG00000086015	MAST2	protein_coding	231.359	-0.370227	0.34404	212.379	-0.261079	0.614927	337.995	-0.270343	0.999918	308.994	-0.263581	1
ENSG00000086061	DNAJA1	protein_coding	3717.83	0.276039	0.225996	4136.1	0.369495	0.114549	2872.38	-0.0343601	0.999918	2873.05	0.0213174	0.967877
ENSG00000086062	B4GALT1	protein_coding	53.9391	-0.0831806	1	58.9509	-0.0889425	1	26.2169	0.742923	0.999918	23.4629	0.633327	1
ENSG00000086065	CHMP5	protein_coding	584.164	0.447476	0.077904	657.669	0.482371	0.056459	550.377	-0.0138535	0.999918	573.149	-0.00288832	1
ENSG00000086102	NFX1	protein_coding	417.995	-0.112882	0.80193	482.001	-0.0213612	0.974405	607.975	-0.00929258	0.999918	695.552	0.0661511	0.906156
ENSG00000086159	AQP6	protein_coding	0.646717	0.200173	1	0.160128	-0.818939	1	0.989399	-0.190866	0.999918	1.6382	2.80821	1
ENSG00000086189	DIMT1	protein_coding	203.642	0.394236	0.346966	194.716	0.283075	0.578301	60.404	0.426971	0.999918	74.5538	0.0571456	1
ENSG00000086200	IPO11	protein_coding	631.174	0.144938	0.70307	719.505	0.256791	0.39867	130.843	0.115716	0.999918	148.521	0.108964	1
ENSG00000086205	FOLH1	protein_coding	3.87822	-0.0833448	1	53.4078	1.1351	1	1.36542	1.55039	0.999918	1.28753	-1.44933	1
ENSG00000086232	EIF2AK1	protein_coding	869.846	-0.0869231	0.809296	894.015	-0.147136	0.678353	1156.53	0.0058162	0.999918	1166.1	0.0256996	0.964777
ENSG00000086288	NME8	protein_coding	1.46805	-3.70419	1	2.20852	-2.42617	1	3.39016	-0.870174	0.999918	1.42781	1.90799	1
ENSG00000086289	EPDR1	protein_coding	59.2904	-0.240192	1	47.1543	-0.0482044	1	11.4605	0.122556	0.999918	4.9901	1.14636	1
ENSG00000086300	SNX10	protein_coding	250.561	0.171899	0.756045	193.513	0.335073	0.514918	85.2197	-0.201119	0.999918	47.1512	-0.0168268	1
ENSG00000086475	SEPHS1	protein_coding	1315.75	0.123037	0.723449	1443.39	0.0641389	0.883892	619.525	0.0435301	0.999918	634.937	-0.124455	0.767636
ENSG00000086504	MRPL28	protein_coding	344.403	0.389469	0.259646	354.194	0.235178	0.570833	173.421	-0.0843592	0.999918	132.554	-0.128948	1
ENSG00000086506	HBQ1	protein_coding	5.22084	1.9866	1	3.29816	0.313263	1	2.11187	0.219526	0.999918	0.425491	0.546031	1
ENSG00000086544	ITPKC	protein_coding	164.162	0.12979	1	169.856	0.103599	0.893931	86.6949	-0.118868	0.999918	81.4365	-0.110727	1
ENSG00000086548	CEACAM6	protein_coding	0	0	1	0.161036	0.936026	1	2.18929	1.02418	0.999918	1.81024	1.98861	1
ENSG00000086570	FAT2	protein_coding	0.808605	-1.14907	1	0.314825	0.0550232	1	8.59067	-0.727129	0.999918	5.23019	1.7536	1
ENSG00000086589	RBM22	protein_coding	577.071	-0.0358089	0.934839	685.412	-0.0088924	0.988666	1067.68	-0.0204992	0.999918	1153.64	-0.000268887	0.999686
ENSG00000086598	TMED2	protein_coding	1427.27	0.114359	0.705716	1710.27	0.205721	0.524831	1109.35	-0.0645471	0.999918	1122.45	-0.0982641	0.772826
ENSG00000086619	ERO1B	protein_coding	25.3168	-0.00969478	1	113.898	0.0852193	0.9386	30.7787	0.32943	0.999918	46.8561	0.0210238	1
ENSG00000086666	ZFAND6	protein_coding	709.855	0.125652	0.724683	993.583	0.199784	0.506118	948.324	-0.0326539	0.999918	918.114	-0.0920339	0.821942
ENSG00000086696	HSD17B2	protein_coding	0.364005	1.88112	1	0	0	1	3.97954	-0.834779	0.999918	1.58764	1.88911	1
ENSG00000086712	TXLNG	protein_coding	280.882	0.132547	0.783026	318.878	0.191232	0.7086	486.99	-0.108287	0.999918	577.725	0.0765193	1
ENSG00000086717	PPEF1	protein_coding	24.9951	-0.303758	1	15.2063	-6.993e-05	1	23.2281	-1.20573	0.999918	28.7672	-0.257063	1
ENSG00000086730	LAT2	protein_coding	1.62269	3.04671	1	1.78422	-0.515413	1	5.95547	0.641199	0.999918	3.4104	1.52857	1
ENSG00000086758	HUWE1	protein_coding	2804.59	-0.324645	0.097424	2704.3	-0.209281	0.415094	3777.93	-0.051074	0.999918	4379.45	-0.169945	0.269246
ENSG00000086827	ZW10	protein_coding	478.036	0.048809	0.91672	573.099	0.210013	0.569128	146.843	-0.0462796	0.999918	172.348	-0.170492	1
ENSG00000086848	ALG9	protein_coding	7.36875	-1.28932	1	8.77866	-0.126739	1	9.11506	0.832398	0.999918	8.79022	0.350505	1
ENSG00000086967	MYBPC2	protein_coding	0.81876	-0.0977842	1	0.675559	-1.49373	1	3.13498	1.4234	0.999918	3.55038	0.973529	1
ENSG00000086991	NOX4	protein_coding	105.289	0.460106	1	119.827	0.197246	0.814521	26.6935	-0.120266	0.999918	35.7344	0.275604	1
ENSG00000087008	ACOX3	protein_coding	99.7161	-0.18039	1	108.633	0.0303503	0.980957	102.151	-0.170272	0.999918	86.9091	-0.26353	1
ENSG00000087053	MTMR2	protein_coding	651.937	0.0424735	0.920927	860.25	0.0285214	0.962701	787.114	0.113743	0.999918	1040.17	0.102472	0.776007
ENSG00000087074	PPP1R15A	protein_coding	252.322	-0.228022	0.654173	208.271	0.0456044	0.965645	956.175	0.0203967	0.999918	1046.87	0.0132524	0.982828
ENSG00000087076	HSD17B14	protein_coding	63.0835	0.262039	1	56.17	0.386878	1	8.94397	-0.279058	0.999918	5.58902	0.240801	1
ENSG00000087077	TRIP6	protein_coding	201.617	0.440264	0.263122	159.357	0.546039	0.204493	14.1727	0.271319	0.999918	14.1099	0.336752	1
ENSG00000087085	ACHE	protein_coding	21.4839	-0.494329	1	22.8838	-0.155199	1	146.266	0.109325	0.999918	113.427	-0.429654	1
ENSG00000087086	FTL	protein_coding	4553.52	0.423426	0.0339201	5135.12	0.422326	0.0601199	2318.9	0.00413963	0.999918	2327.32	-0.19951	0.256188
ENSG00000087087	SRRT	protein_coding	531.233	-0.00586576	0.990876	526.518	0.0980602	0.842117	399.423	-0.090734	0.999918	427.652	-0.39306	1
ENSG00000087088	BAX	protein_coding	267.065	0.601249	0.108916	286.836	0.599861	0.0796505	56.1935	0.0821176	0.999918	57.6116	0.0029138	1
ENSG00000087095	NLK	protein_coding	557.727	-0.077593	0.854951	741.501	0.00223118	0.998512	1356.15	0.00588129	0.999918	1076.33	-0.0786203	0.855198
ENSG00000087111	PIGS	protein_coding	270.737	-0.183261	0.693036	313.252	-0.107584	0.862248	368.423	0.0502457	0.999918	283.461	-0.262503	1
ENSG00000087116	ADAMTS2	protein_coding	28.657	-0.123932	1	13.2273	-0.359641	1	8.9544	0.872092	0.999918	4.51472	-0.258319	1
ENSG00000087128	TMPRSS11E	protein_coding	0	0	1	0	0	1	1.39493	1.10571	0.999918	1.33348	0.426394	1
ENSG00000087152	ATXN7L3	protein_coding	482.054	-0.198943	0.573092	526.409	-0.175705	0.668251	586.309	-0.174344	0.999918	467.173	-0.410547	1
ENSG00000087157	PGS1	protein_coding	183.652	-0.0407542	1	213.393	-0.014591	0.988055	131.203	-0.41272	0.999918	125.005	-0.632229	1
ENSG00000087191	PSMC5	protein_coding	432.377	0.319624	0.287995	393.159	0.199379	0.638044	187.105	0.292789	0.999918	186.326	0.0992324	1
ENSG00000087206	UIMC1	protein_coding	333.132	0.268041	0.456226	433.167	0.282075	0.404598	317.105	-0.0208651	0.999918	379.383	0.209987	1
ENSG00000087237	CETP	protein_coding	0	0	1	0.679237	-0.511783	1	1.50481	-1.39517	0.999918	1.16569	0.975284	1
ENSG00000087245	MMP2	protein_coding	118.597	0.861161	1	177.573	0.433209	0.334192	127.927	0.56738	0.999918	164.57	0.401914	1
ENSG00000087250	MT3	protein_coding	0.688819	0.199585	1	0.313917	-1.60772	1	0.814142	-0.0842725	0.999918	0.695792	-1.27764	1
ENSG00000087253	LPCAT2	protein_coding	43.3661	0.0149017	1	43.0751	0.164544	1	15.2063	0.350333	0.999918	11.723	0.664832	1
ENSG00000087258	GNAO1	protein_coding	91.0983	-1.14821	1	113.132	-1.05329	0.0176604	1193.19	-0.0824805	0.999918	764.95	-0.267445	0.426131
ENSG00000087263	OGFOD1	protein_coding	410.819	0.0260971	0.961268	423.927	0.144939	0.757661	481.889	0.116733	0.999918	571.097	0.0541484	1
ENSG00000087266	SH3BP2	protein_coding	242.22	-0.480331	0.225951	202.368	-0.323213	0.498763	498.681	0.0175291	0.999918	525.587	-0.151125	1
ENSG00000087269	NOP14	protein_coding	301.469	0.242481	0.557077	301.459	-0.000607761	0.999966	120.18	-0.0266433	0.999918	131.157	0.0381025	1
ENSG00000087274	ADD1	protein_coding	1339.05	-0.205804	0.406659	1271.25	-0.13801	0.709328	2830.01	-0.105436	0.999918	2803.09	-0.210656	0.188181
ENSG00000087299	L2HGDH	protein_coding	139.717	0.175515	1	131.723	0.145902	0.859603	57.3706	0.246142	0.999918	65.6763	0.555319	1
ENSG00000087301	TXNDC16	protein_coding	373.689	-0.303422	0.384986	430.707	-0.199734	0.622292	841.452	0.0369445	0.999918	855.973	0.169009	0.637467
ENSG00000087302	C14orf166	protein_coding	1551.2	0.413647	0.0528837	1752.47	0.314767	0.151639	1107.07	0.223266	0.999918	1368.66	0.199474	0.355952
ENSG00000087303	NID2	protein_coding	3.80767	0.0299796	1	2.64092	-0.820432	1	20.8297	0.677647	0.999918	15.3024	-0.324761	1
ENSG00000087338	GMCL1	protein_coding	180.882	0.248252	1	227.467	0.0185305	0.98266	135.837	-0.134637	0.999918	162.799	-0.0673847	1
ENSG00000087365	SF3B2	protein_coding	1710.95	-0.112902	0.704791	1611.72	-0.108626	0.757598	1516.2	-0.0418605	0.999918	1661.73	-0.120781	0.639624
ENSG00000087448	KLHL42	protein_coding	827.67	-0.26025	0.327953	800.977	-0.101027	0.814521	1700.88	0.124743	0.999918	1599.92	-0.0258703	0.959387
ENSG00000087460	GNAS	protein_coding	4681.33	-0.137033	0.669672	5426.21	-0.330479	0.0728086	16658.7	-0.061721	0.999918	36792.5	-0.144894	0.37119
ENSG00000087470	DNM1L	protein_coding	965.685	-0.0926534	0.786511	984.753	0.0596074	0.898023	1244.36	-0.0024462	0.999918	1321.16	-0.00958214	0.984968
ENSG00000087494	PTHLH	protein_coding	0.967583	1.45008	1	1.80603	2.16986	1	8.41645	2.36256	0.999918	3.95751	2.5227	1
ENSG00000087495	PHACTR3	protein_coding	31.0261	0.930242	1	17.7807	-0.211706	1	369.504	0.79314	0.999918	344.75	0.550958	1
ENSG00000087502	ERGIC2	protein_coding	531.683	0.0572652	0.8972	670.502	0.12412	0.768384	612.873	-0.143969	0.999918	687.704	0.141447	0.701132
ENSG00000087510	TFAP2C	protein_coding	35.7149	0.555971	1	5.16185	-0.849123	1	6.64742	0.199355	0.999918	1.68637	-1.55025	1
ENSG00000087586	AURKA	protein_coding	421.724	0.284066	0.385972	507.097	0.360139	0.200389	45.3095	0.258359	0.999918	50.759	0.317474	1
ENSG00000087589	CASS4	protein_coding	1.19695	-0.254008	1	2.32574	0.456022	1	4.04399	1.12414	0.999918	2.66281	1.42877	1
ENSG00000087842	PIR	protein_coding	30.3282	0.445999	1	35.9618	0.231311	1	7.43908	-0.0445174	0.999918	5.89579	-1.0103	1
ENSG00000087884	AAMDC	protein_coding	67.7779	0.846236	1	72.4011	0.582163	1	9.41854	0.45986	0.999918	21.6552	0.349145	1
ENSG00000087903	RFX2	protein_coding	105.659	-0.328574	1	115.763	-0.280724	0.700897	29.3643	-0.272176	0.999918	62.4104	-0.0900062	1
ENSG00000087995	METTL2A	protein_coding	243.879	0.104147	0.854951	252.546	0.189941	0.722284	405.187	0.0504546	0.999918	455.225	0.00494289	1
ENSG00000088002	SULT2B1	protein_coding	0	0	1	0.326523	-1.61825	1	1.90189	1.03844	0.999918	1.06438	2.68765	1
ENSG00000088035	ALG6	protein_coding	227.115	0.397236	0.293051	283.315	0.160304	0.765468	78.8799	-0.241504	0.999918	75.426	0.152631	1
ENSG00000088038	CNOT3	protein_coding	132.317	-0.407936	1	124.992	-0.272583	0.696644	275.962	0.158248	0.999918	285.387	-0.139351	1
ENSG00000088053	GP6	protein_coding	1.35095	1.16318	1	2.02944	0.350899	1	0.964701	-1.74347	0.999918	3.35161	1.83239	1
ENSG00000088179	PTPN4	protein_coding	844.976	-0.189342	0.538173	1070.07	-0.0451416	0.92333	830.899	-0.0457395	0.999918	922.896	0.0315269	0.958622
ENSG00000088205	DDX18	protein_coding	1184.17	0.264998	0.358093	1518.1	0.141102	0.741125	637.948	0.0171402	0.999918	761.122	0.0304832	0.965076
ENSG00000088247	KHSRP	protein_coding	736.735	-0.199035	0.510816	652.207	-0.0990185	0.826354	738.961	0.146229	0.999918	857.322	-0.0670463	0.888038
ENSG00000088256	GNA11	protein_coding	185.224	-0.114026	1	201.862	0.0969092	0.899464	396.731	-0.044369	0.999918	424.502	-0.373831	1
ENSG00000088280	ASAP3	protein_coding	748.172	-0.116451	0.750731	663.017	-0.00200489	0.998973	102.985	-0.0135192	0.999918	100.628	-0.456052	1
ENSG00000088298	EDEM2	protein_coding	96.6762	0.158789	1	120.624	0.0249325	0.98196	50.5993	0.171474	0.999918	62.8216	0.0391284	1
ENSG00000088305	DNMT3B	protein_coding	399.138	-0.155576	0.73474	338.966	-0.157728	0.764939	271.463	-0.0983284	0.999918	368.585	-0.25089	1
ENSG00000088320	REM1	protein_coding	0.175509	1.1014	1	0	0	1	1.03141	1.71334	0.999918	0.146598	-0.275625	1
ENSG00000088325	TPX2	protein_coding	1690.14	-0.0955145	0.789774	1687.36	-0.203034	0.499877	137.047	0.367725	0.999918	155.791	0.450013	1
ENSG00000088340	FER1L4	transcribed_unitary_pseudogene	18.7157	-1.00064	1	14.2515	-0.885758	1	6.96393	0.0700267	0.999918	5.00858	1.35778	1
ENSG00000088356	PDRG1	protein_coding	130.117	0.212531	1	149.784	0.171304	0.814521	58.5762	-0.140207	0.999918	52.7637	-0.182532	1
ENSG00000088367	EPB41L1	protein_coding	230.887	-0.45428	0.241135	276.386	-0.310205	0.429107	1848.96	-0.172017	0.999918	1626.55	-0.239832	0.27218
ENSG00000088386	SLC15A1	protein_coding	0.14516	-0.677864	1	0.333769	0.0565794	1	2.55109	1.16307	0.999918	1.44104	2.26121	1
ENSG00000088387	DOCK9	protein_coding	54.7145	-0.02699	1	40.5968	-0.454279	1	115.15	-0.128169	0.999918	32.7433	0.226919	1
ENSG00000088448	ANKRD10	protein_coding	852.937	-0.309646	0.255418	985.793	-0.144169	0.719083	714.957	-0.237688	0.999918	791.798	0.0611988	0.911543
ENSG00000088451	TGDS	protein_coding	172.787	0.406604	1	243.983	0.499191	0.158676	31.8327	0.015653	0.999918	35.1677	0.0238275	1
ENSG00000088538	DOCK3	protein_coding	263.668	-0.514756	0.189201	171.596	-0.129888	0.87775	901.969	-0.161333	0.999918	638.136	-0.146654	0.697788
ENSG00000088543	C3orf18	protein_coding	119.335	-0.00736437	1	168.821	-0.000735093	0.999966	71.8561	-0.487262	0.999918	75.1443	-0.194106	1
ENSG00000088682	COQ9	protein_coding	195.876	-0.0587904	1	191.752	-0.0298809	0.974563	215.124	0.151652	0.999918	219.636	0.00420662	1
ENSG00000088726	TMEM40	protein_coding	0.137551	-0.670093	1	0	0	1	1.68858	2.18918	0.999918	1.30375	0.549963	1
ENSG00000088727	KIF9	protein_coding	47.7582	0.206954	1	55.7241	0.239392	1	27.2459	0.344967	0.999918	29.9296	-0.15929	1
ENSG00000088756	ARHGAP28	protein_coding	605.234	0.0297397	0.949541	591.284	-0.0754282	0.888239	409.235	-0.0756261	0.999918	311.489	-0.0237511	1
ENSG00000088766	CRLS1	protein_coding	323.885	0.262356	0.490546	335.031	0.126265	0.831401	177.969	0.03431	0.999918	167.348	0.103136	1
ENSG00000088782	DEFB127	protein_coding	0	0	1	0	0	1	0.905905	0.947699	0.999918	0.119644	-0.26686	1
ENSG00000088808	PPP1R13B	protein_coding	40.7379	-0.290138	1	41.2187	-0.412515	1	632.146	-0.246459	0.999918	425.287	-0.0203563	1
ENSG00000088812	ATRN	protein_coding	1013.31	-0.340404	0.135483	1163.47	-0.228306	0.396541	1711.09	-0.11143	0.999918	1642.52	-0.117945	0.655431
ENSG00000088826	SMOX	protein_coding	82.2369	0.0129644	1	114.458	-0.15049	0.87775	86.1908	0.0922728	0.999918	87.2621	-0.0434431	1
ENSG00000088827	SIGLEC1	protein_coding	0.137551	-0.670093	1	0.176303	0.95217	1	4.24865	-0.667284	0.999918	3.57722	0.664722	1
ENSG00000088832	FKBP1A	protein_coding	573.812	0.185107	0.566444	595.293	0.075432	0.880756	723.235	0.127503	0.999918	650.088	0.0342875	0.959884
ENSG00000088833	NSFL1C	protein_coding	379.693	0.0512857	0.922172	381.127	-0.0214628	0.977033	564.01	-0.136835	0.999918	617.546	-0.0446263	1
ENSG00000088836	SLC4A11	protein_coding	3.99697	0.824103	1	4.49381	0.134299	1	3.9465	1.00495	0.999918	3.37667	-0.459	1
ENSG00000088854	C20orf194	protein_coding	505.719	-0.584927	0.0542025	461.417	-0.168266	0.723422	910.017	-0.13386	0.999918	1034.33	-0.0850924	0.847612
ENSG00000088876	ZNF343	protein_coding	141.646	-0.0130124	1	139.731	0.0743062	0.936936	122.426	0.0153021	0.999918	132.053	-0.25362	1
ENSG00000088881	EBF4	protein_coding	36.5265	-0.914913	1	41.4947	-0.359257	1	108.154	-0.189058	0.999918	101.823	-0.411936	1
ENSG00000088882	CPXM1	protein_coding	581.952	-0.275786	0.334366	533.701	-0.5549	0.0416995	172.633	0.178931	0.999918	169.932	-0.225281	1
ENSG00000088888	MAVS	protein_coding	820.497	-0.197452	0.505666	820.685	-0.0937057	0.828729	548.298	0.116159	0.999918	654.602	-0.0421787	0.946691
ENSG00000088899	LZTS3	protein_coding	191.439	-0.388997	1	163.998	-0.210201	0.742527	452.889	-0.205764	0.999918	434.943	-0.277296	1
ENSG00000088926	F11	protein_coding	1.19444	1.56866	1	1.31179	-1.05363	1	5.00281	0.303811	0.999918	4.12864	1.99068	1
ENSG00000088930	XRN2	protein_coding	2191.55	0.146607	0.585798	2876.92	0.144119	0.713962	1611.86	-0.0114023	0.999918	1821.68	0.0187944	0.969282
ENSG00000088970	KIZ	protein_coding	58.9255	0.410678	1	239.121	0.250683	0.686871	55.5551	0.4457	0.999918	93.2569	0.65175	1
ENSG00000088986	DYNLL1	protein_coding	1205.07	0.37775	0.0982109	1088.2	0.410486	0.0861172	568.561	-0.207602	0.999918	508.741	-0.358762	1
ENSG00000088992	TESC	protein_coding	2.60445	0.489945	1	25.6677	0.113178	1	4.37652	-0.490637	0.999918	1.14832	-1.74429	1
ENSG00000089006	SNX5	protein_coding	699.532	0.397208	0.108385	837.662	0.217228	0.463476	166.332	0.0114462	0.999918	183.259	-0.0762677	1
ENSG00000089009	RPL6	protein_coding	10906.5	0.502886	0.00757565	12637.5	0.333806	0.0866943	3639.5	0.178685	0.999918	5195.74	0.157108	0.296645
ENSG00000089012	SIRPG	protein_coding	0.170731	1.09311	1	0	0	1	1.34501	2.22339	0.999918	0.781208	2.90043	1
ENSG00000089022	MAPKAPK5	protein_coding	628.147	-0.162331	0.622996	684.263	-0.118501	0.774795	745.838	-0.0978353	0.999918	813.003	0.0066856	0.987975
ENSG00000089041	P2RX7	protein_coding	0	0	1	0.161036	0.936026	1	4.40585	1.90083	0.999918	3.59852	1.98654	1
ENSG00000089048	ESF1	protein_coding	526.555	0.263794	0.397634	559.147	0.396573	0.180164	263.164	0.0824496	0.999918	277.459	0.0666442	1
ENSG00000089050	RBBP9	protein_coding	498.465	0.0579853	0.903125	604.466	0.134209	0.742527	664.584	-0.0804701	0.999918	776.698	-0.0282919	0.967877
ENSG00000089053	ANAPC5	protein_coding	944.316	0.1502	0.632113	1104.54	0.0819375	0.852834	362.148	-0.0599937	0.999918	418.962	0.0386705	1
ENSG00000089057	SLC23A2	protein_coding	275.806	-0.298168	0.456226	195.907	-0.292116	0.580556	828.753	-0.259607	0.999918	673.905	-0.148618	0.677777
ENSG00000089060	SLC8B1	protein_coding	17.9165	0.317268	1	50.4509	-0.203328	1	6.97616	0.521052	0.999918	5.51203	-0.230522	1
ENSG00000089063	TMEM230	protein_coding	797.937	0.168235	0.578234	1007.67	0.0715648	0.867754	510.194	0.173157	0.999918	561.479	-0.0603073	1
ENSG00000089091	DZANK1	protein_coding	106.884	-0.00802657	1	121.777	0.00718388	0.995834	102.313	-0.224247	0.999918	106.835	-0.168455	1
ENSG00000089094	KDM2B	protein_coding	605.202	-0.0895099	0.823017	516.831	-0.0956102	0.852834	522.899	-0.21059	0.999918	477.693	-0.294807	1
ENSG00000089101	CFAP61	protein_coding	15.7847	-0.33845	1	22.5165	-0.270916	1	26.2435	0.234331	0.999918	23.58	0.173355	1
ENSG00000089116	LHX5	protein_coding	263.453	-0.287492	0.545187	126.97	-0.311986	0.621806	530.188	-0.391496	0.999918	148.602	-0.516115	1
ENSG00000089123	TASP1	protein_coding	131.377	0.053253	1	172.619	0.223707	0.717329	86.2944	0.0570672	0.999918	84.9527	0.0848757	1
ENSG00000089127	OAS1	protein_coding	0.31306	0.209944	1	0.519246	1.16368	1	2.03906	0.886352	0.999918	2.58107	2.45341	1
ENSG00000089154	GCN1	protein_coding	1164.99	-0.0509415	0.891022	1285.77	-0.0907014	0.819327	588.065	0.014022	0.999918	641.772	-0.193931	0.549681
ENSG00000089157	RPLP0	protein_coding	14493.8	0.501817	0.0108207	15620.7	0.318408	0.0864267	2124.39	0.071159	0.999918	2369.97	-0.0133562	0.979811
ENSG00000089159	PXN	protein_coding	139.191	-0.0331787	1	110.354	0.0169966	0.988666	166.84	0.0416114	0.999918	113.901	-0.187865	1
ENSG00000089163	SIRT4	protein_coding	14.9889	0.311881	1	26.0697	0.608799	1	13.525	0.270467	0.999918	10.888	0.00756244	1
ENSG00000089169	RPH3A	protein_coding	1.70892	-0.123933	1	0.326523	-1.61825	1	24.9051	-0.329047	0.999918	11.1175	0.060559	1
ENSG00000089177	KIF16B	protein_coding	144.374	-0.180123	1	135.261	-0.0686294	0.942993	71.2027	-0.359993	0.999918	48.0322	0.309429	1
ENSG00000089195	TRMT6	protein_coding	155.355	0.206557	1	194.719	0.278375	0.616201	259.888	0.391786	0.999918	271.305	0.228837	1
ENSG00000089199	CHGB	protein_coding	145.827	-0.741498	1	201.204	-0.578299	0.141771	1365.38	0.018789	0.999918	1353.87	0.00660553	0.987888
ENSG00000089220	PEBP1	protein_coding	2293.99	0.100827	0.744542	2519.6	0.0525032	0.902803	1650.47	-0.099561	0.999918	1613.86	-0.108632	0.693813
ENSG00000089225	TBX5	protein_coding	0.31306	0.209944	1	0	0	1	2.36506	3.30059	0.999918	1.00208	0.558639	1
ENSG00000089234	BRAP	protein_coding	407.747	-0.210872	0.551727	457.973	0.0898785	0.864468	599.765	-0.0417473	0.999918	708.506	0.146609	0.688939
ENSG00000089248	ERP29	protein_coding	608.86	0.378368	0.15297	703.016	0.137522	0.725808	559.508	0.0798702	0.999918	613.233	-0.069627	1
ENSG00000089250	NOS1	protein_coding	1.18997	1.41267	1	0.503979	0.93016	1	16.7775	0.983222	0.999918	12.8413	0.909437	1
ENSG00000089280	FUS	protein_coding	448.549	-0.0724837	0.88202	339.699	-0.307608	0.41588	114.17	0.198195	0.999918	117.782	0.0945787	1
ENSG00000089289	IGBP1	protein_coding	447.367	0.124197	0.762339	494.332	0.198097	0.600918	383.167	0.0207304	0.999918	455.925	0.0408292	1
ENSG00000089327	FXYD5	protein_coding	4.73613	1.49485	1	6.31181	0.131651	1	1.6479	-0.479976	0.999918	2.31107	3.18444	1
ENSG00000089335	ZNF302	protein_coding	674.399	0.0322603	0.942392	770.855	0.101883	0.823674	509.445	-0.0248884	0.999918	572.843	0.080514	1
ENSG00000089351	GRAMD1A	protein_coding	199.885	-0.143028	0.795143	183.155	-0.326716	0.508299	322.993	0.00408416	0.999918	307.263	-0.166539	1
ENSG00000089356	FXYD3	protein_coding	0.998818	1.03763	1	0.506641	0.932308	1	2.64006	0.528914	0.999918	2.15295	3.83964	1
ENSG00000089472	HEPH	protein_coding	510.481	-0.0670523	0.879986	693.695	-0.108256	0.800208	246.175	-0.161526	0.999918	185.125	-0.210569	1
ENSG00000089486	CDIP1	protein_coding	311.189	0.0275466	0.965388	320.635	-0.132799	0.807733	320.19	-0.0270948	0.999918	329.445	-0.268004	1
ENSG00000089505	CMTM1	protein_coding	11.5998	-0.053586	1	10.7781	-0.179207	1	26.3152	-0.165262	0.999918	22.3706	-0.169594	1
ENSG00000089558	KCNH4	protein_coding	2.86119	0.0201354	1	12.0195	-1.34084	1	8.99318	-0.698006	0.999918	11.9212	-0.520419	1
ENSG00000089597	GANAB	protein_coding	1580.77	-0.103638	0.748891	1628.56	-0.252197	0.289534	561.291	-0.0272618	0.999918	554.038	-0.255426	1
ENSG00000089639	GMIP	protein_coding	61.7452	-0.344775	1	61.0884	-0.361349	1	162.325	-0.294234	0.999918	136.732	-0.234485	1
ENSG00000089682	RBM41	protein_coding	230.115	-0.060971	0.919333	250.968	-0.0696903	0.924826	136.574	0.0751726	0.999918	139.307	0.339854	1
ENSG00000089685	BIRC5	protein_coding	949.845	0.219657	0.409401	858.567	0.252062	0.363443	35.3469	0.958026	0.999918	44.0448	1.43831	1
ENSG00000089692	LAG3	protein_coding	10.8881	-0.0556229	1	11.8551	-0.51831	1	10.8184	0.618562	0.999918	12.5384	0.0925311	1
ENSG00000089693	MLF2	protein_coding	833.719	0.0113756	0.980228	875.341	-0.0818705	0.854303	1142.64	-0.115071	0.999918	1088.76	-0.235366	0.296645
ENSG00000089723	OTUB2	protein_coding	95.5168	-0.0751267	1	93.0428	-0.307186	1	110.335	-0.182051	0.999918	89.2767	-0.184865	1
ENSG00000089737	DDX24	protein_coding	1132.81	-0.11912	0.701622	1647.6	-0.0414297	0.924799	2630.07	-0.169041	0.999918	3277.16	-0.0559788	0.859437
ENSG00000089775	ZBTB25	protein_coding	318.6	0.00643269	0.991307	309.255	-0.179807	0.71835	234.723	-0.025954	0.999918	244.804	-0.0737982	1
ENSG00000089818	NECAP1	protein_coding	327.44	-0.221103	0.565354	370.607	0.244133	0.524251	2031	-0.0604792	0.999918	1635.37	-0.0685693	0.871022
ENSG00000089820	ARHGAP4	protein_coding	20.7176	-0.378678	1	26.637	-0.304567	1	6.7243	-0.246041	0.999918	13.994	-0.541426	1
ENSG00000089847	ANKRD24	protein_coding	12.8832	0.126063	1	21.9249	-0.413081	1	27.6509	-0.850885	0.999918	36.6141	-0.0818046	1
ENSG00000089876	DHX32	protein_coding	581.877	0.11463	0.769322	584.685	0.18792	0.658002	177.361	-0.0300384	0.999918	150.021	-0.23853	1
ENSG00000089902	RCOR1	protein_coding	360.562	-0.18069	0.651837	422.9	-0.120789	0.809606	160.684	0.268595	0.999918	167.948	0.0128791	1
ENSG00000089916	GPATCH2L	protein_coding	1220.85	-0.198722	0.448569	1408.13	-0.116405	0.737577	1330.9	-0.0687789	0.999918	1385.44	0.0134063	0.980715
ENSG00000090006	LTBP4	protein_coding	260.255	-0.401134	0.278714	279.411	-0.593197	0.0739804	56.6328	0.0493999	0.999918	51.5383	-0.0684251	1
ENSG00000090013	BLVRB	protein_coding	112.611	0.545688	1	111.955	0.634997	0.189439	12.5961	-0.184064	0.999918	8.33053	-0.397175	1
ENSG00000090020	SLC9A1	protein_coding	45.5758	-0.579876	1	46.8598	-0.277432	1	70.2961	-0.100448	0.999918	74.4871	-0.35028	1
ENSG00000090054	SPTLC1	protein_coding	416.274	0.187186	0.638324	523.823	0.30799	0.321818	265.755	0.0906553	0.999918	309.035	0.101561	1
ENSG00000090060	PAPOLA	protein_coding	1641.93	0.0873501	0.791465	1812.29	0.0979069	0.796608	1409.5	-0.100357	0.999918	1655.06	0.106596	0.693813
ENSG00000090061	CCNK	protein_coding	157.046	-0.103212	1	156.33	0.196587	0.767588	208.136	0.225298	0.999918	277.009	0.422247	1
ENSG00000090097	PCBP4	protein_coding	955.878	-0.368709	0.142458	1002.25	-0.167619	0.603656	1390.68	0.0314929	0.999918	1640.7	-0.267947	0.13972
ENSG00000090104	RGS1	protein_coding	0	0	1	0.822619	1.99733	1	1.21759	2.48158	0.999918	9.22135	-0.594038	1
ENSG00000090238	YPEL3	protein_coding	53.9417	-0.852341	1	69.7278	-0.664097	1	176.696	-0.393917	0.999918	145.318	-0.376613	1
ENSG00000090263	MRPS33	protein_coding	232.228	0.479414	0.192124	316.68	0.34314	0.349287	226.897	0.0725842	0.999918	284.093	0.149058	1
ENSG00000090266	NDUFB2	protein_coding	477.319	0.640283	0.0146998	466.077	0.643377	0.0126107	90.8449	-0.053822	0.999918	92.4115	0.317614	1
ENSG00000090273	NUDC	protein_coding	390.43	0.0183164	0.973354	394.195	0.056029	0.929275	333.258	-0.0501977	0.999918	380.329	-0.130968	1
ENSG00000090316	MAEA	protein_coding	390.817	0.182045	0.662242	445.22	0.217259	0.640434	421.298	0.12177	0.999918	411.582	-0.0933649	1
ENSG00000090339	ICAM1	protein_coding	3.52335	3.39133	1	2.29496	0.356181	1	3.17093	1.67586	0.999918	1.57861	-0.501452	1
ENSG00000090372	STRN4	protein_coding	795.979	-0.184675	0.524914	790.158	-0.181871	0.596902	2471.6	0.0339653	0.999918	2753.27	-0.0352107	0.931228
ENSG00000090376	IRAK3	protein_coding	13.412	-0.142633	1	14.2464	-0.652497	1	11.6539	0.658456	0.999918	13.0106	0.282202	1
ENSG00000090382	LYZ	protein_coding	0.315892	0.206518	1	0.161036	0.936026	1	1.52992	2.47501	0.999918	1.31976	-3.39378	1
ENSG00000090402	SI	protein_coding	0.364005	1.88112	1	0.153789	-0.81843	1	3.71105	1.69402	0.999918	3.74846	1.70221	1
ENSG00000090432	MUL1	protein_coding	185.469	0.0761002	1	214.885	0.0116646	0.990041	167.629	-0.058765	0.999918	167.138	-0.0427423	1
ENSG00000090447	TFAP4	protein_coding	197.491	0.230986	0.654837	200.285	-0.0925767	0.899995	41.2852	0.474731	0.999918	47	-0.380359	1
ENSG00000090470	PDCD7	protein_coding	252.836	0.0395902	0.948413	253.071	0.0268672	0.973731	234.476	-0.0219771	0.999918	250.199	-0.0769861	1
ENSG00000090487	SPG21	protein_coding	664.166	0.123537	0.744644	862.602	0.143182	0.700167	430.656	0.00628913	0.999918	488.505	-0.0460892	1
ENSG00000090512	FETUB	protein_coding	0	0	1	0.170209	0.952709	1	2.76331	2.71596	0.999918	3.15251	-0.191068	1
ENSG00000090520	DNAJB11	protein_coding	198.384	0.444966	0.266919	235.417	0.440706	0.27805	148.763	0.0951657	0.999918	144.502	-0.0413728	1
ENSG00000090530	P3H2	protein_coding	97.667	0.346922	1	13.7587	1.20858	1	22.3947	0.256044	0.999918	11.8183	1.49817	1
ENSG00000090534	THPO	protein_coding	2.39636	1.54812	1	1.00572	-0.971388	1	3.11721	1.57685	0.999918	1.75672	2.19452	1
ENSG00000090539	CHRD	protein_coding	12.4667	-0.0864483	1	9.49409	-0.273855	1	6.04662	0.0785725	0.999918	7.03993	1.32078	1
ENSG00000090554	FLT3LG	protein_coding	0	0	1	0	0	1	0.940561	1.59327	0.999918	0.525455	0.306379	1
ENSG00000090565	RAB11FIP3	protein_coding	335.784	-0.327115	0.34222	307.616	-0.216462	0.684474	461.224	0.0303635	0.999918	488.672	-0.178035	1
ENSG00000090581	GNPTG	protein_coding	102.591	0.107461	1	133.936	0.0984	0.908351	126.269	-0.0221715	0.999918	105.167	-0.381869	1
ENSG00000090612	ZNF268	protein_coding	951.371	-0.113799	0.729607	1212.22	0.0600277	0.892395	656.506	-0.237928	0.999918	875.328	0.0973503	0.806129
ENSG00000090615	GOLGA3	protein_coding	558.211	-0.28331	0.327953	657.863	0.00390739	0.997417	690.107	-0.128989	0.999918	632.25	-0.358528	1
ENSG00000090621	PABPC4	protein_coding	502.98	0.0251559	0.960642	463.352	-0.0259392	0.969774	527.455	0.0246707	0.999918	633.221	-0.0230692	1
ENSG00000090659	CD209	protein_coding	0	0	1	0.161036	0.936026	1	2.77968	-0.0935887	0.999918	1.67528	-0.99842	1
ENSG00000090661	CERS4	protein_coding	250.469	0.192312	0.681544	365.646	0.376278	0.264653	248.807	-0.0966324	0.999918	227.673	-0.157873	1
ENSG00000090674	MCOLN1	protein_coding	30.6389	-0.451309	1	31.4497	-0.436021	1	31.5468	0.0174598	0.999918	26.8915	0.030882	1
ENSG00000090686	USP48	protein_coding	500.662	0.053952	0.903383	569.618	0.0098052	0.988666	434.028	-0.0138801	0.999918	483.325	0.178935	1
ENSG00000090776	EFNB1	protein_coding	1909.02	0.0317619	0.93404	1221.45	-0.115465	0.77934	270.894	-0.268687	0.999918	256.792	-0.441811	1
ENSG00000090857	PDPR	protein_coding	562.678	-0.256354	0.385098	592.812	-0.242411	0.455422	400.163	-0.1186	0.999918	419.701	-0.0616119	1
ENSG00000090861	AARS	protein_coding	675.462	0.207578	0.571615	671.253	-0.0552634	0.913575	582.762	-0.0736569	0.999918	634.41	-0.192892	0.561034
ENSG00000090863	GLG1	protein_coding	1464.24	-0.171044	0.530792	1747.3	-0.203652	0.499573	1401.98	-0.100334	0.999918	1487.51	-0.103079	0.7123
ENSG00000090889	KIF4A	protein_coding	878.957	0.0828899	0.830664	826.546	0.0787784	0.864468	41.8949	0.470201	0.999918	46.1496	0.339351	1
ENSG00000090905	TNRC6A	protein_coding	1130.97	-0.260873	0.292285	1246.47	-0.16181	0.597578	1171.61	-0.112245	0.999918	1315.85	-0.00581022	0.987888
ENSG00000090924	PLEKHG2	protein_coding	359.004	-0.297679	0.47761	300.885	-0.0896516	0.883892	583.297	0.0178084	0.999918	590.72	-0.175512	1
ENSG00000090932	DLL3	protein_coding	329.728	-0.441862	0.248728	500.119	-0.543169	0.0372912	65.0165	-0.257034	0.999918	72.6996	-0.306869	1
ENSG00000090971	NAT14	protein_coding	287.486	0.115344	0.814664	305.09	0.176782	0.723422	132.437	0.0946085	0.999918	98.3151	-0.145421	1
ENSG00000090975	PITPNM2	protein_coding	27.1729	0.297294	1	16.9876	-0.458825	1	52.9717	0.202474	0.999918	20.2872	-0.0288393	1
ENSG00000090989	EXOC1	protein_coding	771.527	-0.169038	0.585444	936.501	0.0547358	0.904889	690.568	-0.098841	0.999918	743.038	0.147063	0.691427
ENSG00000091009	RBM27	protein_coding	534.612	0.0583376	0.898367	638.414	-0.00353428	0.997635	325.504	-0.123182	0.999918	350.718	-0.0785354	1
ENSG00000091010	POU4F3	protein_coding	0.522153	0.460917	1	0.467706	-1.97549	1	0.656031	0.380153	0.999918	0.516231	2.65687	1
ENSG00000091039	OSBPL8	protein_coding	2166.21	-0.111108	0.767601	3321.34	0.0262329	0.962312	2644.45	0.00961209	0.999918	2617.8	0.0557062	0.871747
ENSG00000091073	DTX2	protein_coding	28.7014	0.426981	1	34.6993	0.362636	1	28.9804	0.0531239	0.999918	30.8238	-0.467472	1
ENSG00000091106	NLRC4	protein_coding	0.18443	-0.692072	1	0.330092	0.0492796	1	3.52459	0.4288	0.999918	1.27326	3.09779	1
ENSG00000091127	PUS7	protein_coding	323.374	0.284161	0.430012	335.997	-0.0232962	0.977033	92.9273	0.370888	0.999918	117.785	0.057063	1
ENSG00000091128	LAMB4	protein_coding	4.82514	0.78994	1	6.5899	-0.0964642	1	10.2379	0.536118	0.999918	9.84997	0.0609653	1
ENSG00000091129	NRCAM	protein_coding	2222.6	-0.690114	0.239469	3422.92	-0.380318	0.0906717	3099.95	-0.50343	0.999918	5528.95	-0.331964	0.0313081
ENSG00000091136	LAMB1	protein_coding	134.619	1.53815	1	85.7341	1.45709	1	52.0328	1.19044	0.999918	48.1398	-0.180643	1
ENSG00000091137	SLC26A4	protein_coding	1.95296	0.339514	1	3.09941	0.148354	1	6.28816	-0.592216	0.999918	4.40262	0.583369	1
ENSG00000091138	SLC26A3	protein_coding	0	0	1	0.170209	0.952709	1	2.79337	1.74116	0.999918	2.30849	2.94987	1
ENSG00000091140	DLD	protein_coding	815.844	0.278211	0.271668	868.37	0.264281	0.363443	665.421	0.00560111	0.999918	685.151	0.15428	0.661032
ENSG00000091157	WDR7	protein_coding	353.656	-0.290173	0.399555	422.29	-0.201414	0.623476	744.487	-0.0889244	0.999918	763.53	-0.0880488	0.855198
ENSG00000091164	TXNL1	protein_coding	672.388	0.107928	0.775446	729.329	0.0838297	0.86565	1129.42	-0.0922426	0.999918	1404.79	0.0765685	0.833
ENSG00000091181	IL5RA	protein_coding	0.825058	1.55079	1	0.670201	0.0573561	1	15.4906	0.335505	0.999918	12.5149	0.702952	1
ENSG00000091262	ABCC6	protein_coding	3.41463	0.169737	1	13.4606	-0.628096	1	3.96566	0.757938	0.999918	2.30698	0.0888143	1
ENSG00000091317	CMTM6	protein_coding	780.356	0.134352	0.721858	1320.68	0.289088	0.264679	149.048	0.160366	0.999918	190.928	0.0656965	1
ENSG00000091409	ITGA6	protein_coding	1013.96	-0.501258	0.0194388	1078.29	-0.215049	0.469898	300.5	0.673493	0.999918	891.518	0.307403	0.179087
ENSG00000091428	RAPGEF4	protein_coding	23.8053	-0.673059	1	32.7049	-0.501538	1	145.36	-0.0425183	0.999918	114.8	-0.176128	1
ENSG00000091436	MAP3K20	protein_coding	209.72	0.265824	0.568382	253.398	0.0747534	0.912992	31.2796	0.99986	0.999918	66.7236	-0.104325	1
ENSG00000091482	SMPX	protein_coding	0	0	1	0	0	1	0.45039	0.215803	0.999918	0	0	1
ENSG00000091483	FH	protein_coding	699.753	0.335802	0.207585	746.515	0.136873	0.749997	287.886	0.0310715	0.999918	273.589	0.133301	1
ENSG00000091490	SEL1L3	protein_coding	108.219	0.323151	1	29.1056	0.411016	1	58.0005	1.06282	0.999918	305.238	0.150531	1
ENSG00000091513	TF	protein_coding	3.96312	-0.526282	1	9.17591	-0.110089	1	10.4622	-0.455246	0.999918	9.74724	0.469794	1
ENSG00000091527	CDV3	protein_coding	1626.79	0.0220684	0.959424	1451.29	0.00913187	0.986972	1565.55	0.071844	0.999918	1641.6	0.0147129	0.978411
ENSG00000091536	MYO15A	protein_coding	11.3447	0.212302	1	14.0884	-0.146927	1	11.9107	-0.578016	0.999918	14.4915	-0.34824	1
ENSG00000091542	ALKBH5	protein_coding	693.054	-0.00566182	0.990346	745.226	-0.34686	0.175913	770.048	-0.0982209	0.999918	758.2	-0.315705	0.19049
ENSG00000091583	APOH	protein_coding	0	0	1	0	0	1	1.65274	-2.32968	0.999918	0.922041	2.58146	1
ENSG00000091592	NLRP1	protein_coding	0.31306	0.209944	1	0.516722	2.11514	1	5.07424	0.336014	0.999918	3.33163	-0.437865	1
ENSG00000091622	PITPNM3	protein_coding	29.6941	-0.0179114	1	36.4329	-0.588753	1	40.1789	-0.0308166	0.999918	32.3775	0.308061	1
ENSG00000091640	SPAG7	protein_coding	410.139	0.435544	0.172606	484.674	0.419332	0.123932	402.337	0.334563	0.999918	466.652	0.0823091	1
ENSG00000091651	ORC6	protein_coding	245.426	0.398051	0.288454	212.566	0.194097	0.731145	44.4294	0.430342	0.999918	55.3816	0.0595861	1
ENSG00000091656	ZFHX4	protein_coding	1403.99	-0.323316	0.300866	1150.77	-0.270317	0.357812	3305.84	-0.288768	0.999918	1790.21	-0.152129	0.664331
ENSG00000091664	SLC17A6	protein_coding	356.163	-1.34521	0.265103	45.3978	-0.233448	1	1276.23	-0.504393	0.999918	357.54	0.229997	1
ENSG00000091704	CPA1	protein_coding	0.326047	0.203465	1	0.686375	1.3389	1	0.420355	0.859274	0.999918	0	0	1
ENSG00000091732	ZC3HC1	protein_coding	219.971	0.194133	0.701622	246.382	0.137061	0.819894	105.672	0.222503	0.999918	108.055	-0.200944	1
ENSG00000091831	ESR1	protein_coding	1.48981	-0.786261	1	0.683851	2.86198	1	6.82696	-1.06638	0.999918	5.47027	1.3649	1
ENSG00000091844	RGS17	protein_coding	124.363	-0.257297	1	97.8313	-0.0506227	0.965645	604.851	-0.0652473	0.999918	385.02	0.00342197	1
ENSG00000091879	ANGPT2	protein_coding	13.7717	-0.0419011	1	2.33123	0.438224	1	5.87757	1.1178	0.999918	4.80843	-0.829926	1
ENSG00000091947	TMEM101	protein_coding	237.958	0.246835	0.565985	264.105	0.0547378	0.93966	51.0389	-0.073252	0.999918	51.6067	-0.623978	1
ENSG00000091972	CD200	protein_coding	559.115	-0.250378	0.454321	723.95	0.0498492	0.924022	2936.12	-0.0990457	0.999918	2921.28	0.0216622	0.969282
ENSG00000091986	CCDC80	protein_coding	43.6405	0.0443083	1	14.4746	0.844761	1	117.514	0.983641	0.999918	162.026	1.13764	1
ENSG00000092009	CMA1	protein_coding	0	0	1	0.161036	0.936026	1	1.6284	2.35346	0.999918	0.695792	-1.27764	1
ENSG00000092010	PSME1	protein_coding	284.192	0.0641662	0.904524	394.117	0.0334844	0.965645	130.957	0.0131639	0.999918	146.526	-0.233048	1
ENSG00000092020	PPP2R3C	protein_coding	395.417	0.396876	0.204073	485.56	0.345468	0.281402	189.891	0.149891	0.999918	246.868	0.334234	1
ENSG00000092036	HAUS4	protein_coding	119.471	0.286911	1	150.943	0.157719	0.834041	6.19787	-0.756668	0.999918	8.56769	0.706011	1
ENSG00000092051	JPH4	protein_coding	88.6177	-0.689643	1	95.0541	-0.419936	0.614927	638.254	-0.0658601	0.999918	592.667	-0.322055	1
ENSG00000092054	MYH7	protein_coding	6.76933	-0.384493	1	0.663861	0.0445805	1	28.7479	-0.425539	0.999918	14.6629	-0.23384	1
ENSG00000092067	CEBPE	protein_coding	0	0	1	0	0	1	0.424858	0.393371	0.999918	0.305847	0.645892	1
ENSG00000092068	SLC7A8	protein_coding	29.0426	-0.603824	1	34.6455	-0.630853	1	113.46	0.341494	0.999918	120.365	-0.0578538	1
ENSG00000092094	OSGEP	protein_coding	194.771	0.194154	1	197.379	0.167119	0.790118	126.927	0.228875	0.999918	125.586	0.100601	1
ENSG00000092096	SLC22A17	protein_coding	339.175	-0.45788	0.141429	301.062	-0.349042	0.32879	826.413	-0.282109	0.999918	415.761	-0.515572	1
ENSG00000092098	RNF31	protein_coding	129.871	-0.425896	1	125.997	-0.198681	0.806067	114.27	-0.232123	0.999918	118.139	-0.289518	1
ENSG00000092108	SCFD1	protein_coding	657.87	0.298813	0.262658	795.006	0.264269	0.349962	486.549	-0.00270809	0.999918	584.652	0.0467884	1
ENSG00000092140	G2E3	protein_coding	704.003	0.074778	0.857914	897.995	0.234856	0.395697	336.89	-0.136507	0.999918	353.711	0.0227236	1
ENSG00000092148	HECTD1	protein_coding	2683.22	-0.141912	0.598675	2554.06	-0.0532723	0.899464	2531.11	-0.113088	0.999918	2654.2	-0.0677212	0.821942
ENSG00000092199	HNRNPC	protein_coding	8026.19	0.470089	0.00595329	8240.13	0.312806	0.0960394	6723.54	0.0181963	0.999918	7751.5	-0.0111728	0.978411
ENSG00000092200	RPGRIP1	protein_coding	1.00797	-0.508533	1	0.834071	0.861896	1	5.27497	-0.336434	0.999918	4.71086	0.392401	1
ENSG00000092201	SUPT16H	protein_coding	3688.98	0.0232412	0.9535	3815.58	-0.0465506	0.909925	1987.62	0.0643057	0.999918	2397.16	-0.0349449	0.932694
ENSG00000092203	TOX4	protein_coding	643.236	0.079785	0.84434	657.693	0.0525313	0.916864	997.276	-0.0570563	0.999918	1012.65	-0.0930214	0.819175
ENSG00000092208	GEMIN2	protein_coding	240.852	0.557713	0.119905	258.614	0.347293	0.398201	78.6197	0.18919	0.999918	81.8474	-0.376691	1
ENSG00000092295	TGM1	protein_coding	7.94683	-0.173856	1	9.61888	-0.61192	1	9.59021	0.0447045	0.999918	8.85233	-0.423623	1
ENSG00000092330	TINF2	protein_coding	302.223	-0.135693	0.771116	347.008	-0.115113	0.834156	328.62	-0.0662597	0.999918	309.024	-0.279543	1
ENSG00000092345	DAZL	protein_coding	1.9839	-0.548369	1	0	0	1	3.25511	0.227195	0.999918	2.57583	1.82421	1
ENSG00000092377	TBL1Y	protein_coding	62.8906	-0.331298	1	52.8301	0.0682556	1	2.40415	0.704172	0.999918	5.58837	-0.623849	1
ENSG00000092421	SEMA6A	protein_coding	475.101	-0.146103	0.722267	777.332	-0.174026	0.643376	1067.34	0.305754	0.999918	1385.53	0.11843	0.674631
ENSG00000092439	TRPM7	protein_coding	929.898	0.109934	0.750996	1048.12	0.160105	0.649097	506.36	-0.0383663	0.999918	523.996	0.0204624	1
ENSG00000092445	TYRO3	protein_coding	564.886	0.146828	0.694178	595.968	-0.0753676	0.883892	105.382	0.0717508	0.999918	124.691	0.0104951	1
ENSG00000092470	WDR76	protein_coding	336.954	-0.130569	0.775446	345.174	-0.134553	0.796608	28.8591	-0.310932	0.999918	58.8227	-0.499533	1
ENSG00000092529	CAPN3	protein_coding	0.767815	-1.6227	1	0.512734	0.418312	1	1.36001	0.192835	0.999918	0.864456	1.19857	1
ENSG00000092531	SNAP23	protein_coding	145.29	0.698804	1	158.306	0.528562	0.277989	45.5126	0.0627801	0.999918	43.0369	-0.167937	1
ENSG00000092607	TBX15	protein_coding	1.52534	-0.670897	1	2.66283	0.289598	1	3.34141	-0.574885	0.999918	4.78612	1.63161	1
ENSG00000092621	PHGDH	protein_coding	998.162	0.363976	0.163953	682.094	0.054747	0.91196	86.951	0.526352	0.999918	91.9413	0.211315	1
ENSG00000092758	COL9A3	protein_coding	39.8427	0.177661	1	20.7297	-1.16214	1	9.79417	0.561539	0.999918	4.1641	0.346929	1
ENSG00000092820	EZR	protein_coding	620.633	0.185952	0.592359	731.536	0.112713	0.803234	111.297	1.25187	0.999918	108.681	1.12667	1
ENSG00000092841	MYL6	protein_coding	3553.28	0.402034	0.0537772	4492.49	0.451489	0.0162092	3098.27	0.123468	0.999918	3673.2	-0.0397639	0.927907
ENSG00000092847	AGO1	protein_coding	1621.3	-0.420634	0.0667896	1905.63	-0.413682	0.0641768	949.447	0.0588399	0.999918	1016.47	0.0931957	0.805849
ENSG00000092850	TEKT2	protein_coding	88.0551	-0.199261	1	111.464	-0.464641	0.40665	64.5238	-0.190625	0.999918	87.3989	-0.332845	1
ENSG00000092853	CLSPN	protein_coding	437.468	0.0664053	0.890792	432.591	-0.0329617	0.965645	51.6676	0.80982	0.999918	84.6829	0.681342	1
ENSG00000092871	RFFL	protein_coding	190.046	-0.363274	1	186.686	-0.209635	0.724675	228.716	-0.0755461	0.999918	206.902	-0.037013	1
ENSG00000092929	UNC13D	protein_coding	5.29805	-0.444675	1	2.96424	-0.00360689	1	3.75892	0.212553	0.999918	4.99216	0.441021	1
ENSG00000092931	MFSD11	protein_coding	105.279	-0.060294	1	137.092	0.0262793	0.981179	110.635	-0.100769	0.999918	109.038	-0.196564	1
ENSG00000092964	DPYSL2	protein_coding	6886.3	-0.226728	0.259279	8859.51	-0.210217	0.353593	23212.6	-0.116777	0.999918	26039	-0.165876	0.195697
ENSG00000092969	TGFB2	protein_coding	69.6101	0.842371	1	19.9506	0.612898	1	37.3155	0.171829	0.999918	163.256	0.126078	1
ENSG00000092978	GPATCH2	protein_coding	450.741	-0.121513	0.770185	531.398	0.0574181	0.921653	451.121	0.0240206	0.999918	493.728	0.167179	1
ENSG00000093000	NUP50	protein_coding	1045.17	-0.129904	0.69684	1033.86	0.0391258	0.950289	641.166	0.083531	0.999918	654.596	0.0179126	0.979811
ENSG00000093009	CDC45	protein_coding	254.866	0.405494	0.263122	241.914	0.0773755	0.913575	11.8605	1.24695	0.999918	19.8752	1.5794	1
[truncated: 56,352 more rows]

## Sheet: S2B. gene lists
Supplemental Table S2B. List of DEGs and background genes. Related to Fig. 3 and Fig. S4
dNPC_up	dNPC_down	vNPC_up	vNPC_down	dNeuron_up	dNeuron_down	vNeuron_up	vNeuron_down	bkg_dNPC	bkg_vNPC	bkg_dNeuron	bkg_vNeuron
DPM1	TSPOAP1	RPS20	ARX	CRABP2	FAR2	RBM3	NISCH	ENSG00000000003	ENSG00000000003	ENSG00000000003	ENSG00000000003
PROM1	SPAG9	HSPA5	THSD7A		LRRTM2	GAPDH	SYT13	ENSG00000000419	ENSG00000000419	ENSG00000000005	ENSG00000000419
NOS2	PKD1	FGFR3	TSPOAP1		TTN	HMGCS1	ADGRL1	ENSG00000000457	ENSG00000000457	ENSG00000000419	ENSG00000000457
RPS20	TIMP2	LAPTM4A	NRXN3		P2RY1	CDH6	KIF3C	ENSG00000000460	ENSG00000000460	ENSG00000000457	ENSG00000000460
MDH1	NEXMIF	RPL31	EPHA3		SEMA3E	RPL11	NRCAM	ENSG00000001036	ENSG00000001036	ENSG00000000460	ENSG00000001036
PSMA4	SLC4A8	ENO1	NEXMIF			ITGB1	SBF1	ENSG00000001084	ENSG00000001084	ENSG00000001036	ENSG00000001084
CNN2	SYNE2	HSP90AA1	SLC4A8			UQCRB	NEFM	ENSG00000001167	ENSG00000001167	ENSG00000001084	ENSG00000001167
MTHFD2	ATP9A	NDUFB2	CS			RPL26	AES	ENSG00000001460	ENSG00000001460	ENSG00000001167	ENSG00000001460
RPL31	FAM168A	MYL6	PKM			PRTG	CLIP2	ENSG00000001461	ENSG00000001461	ENSG00000001460	ENSG00000001461
UBE2T	KMT2C	PCSK5	NAV3			HIST1H1E	PTP4A1	ENSG00000001497	ENSG00000001497	ENSG00000001461	ENSG00000001497
VDAC3	ATP2B4	XBP1	REEP1			ID4	ARRDC3	ENSG00000001561	ENSG00000001561	ENSG00000001497	ENSG00000001561
HSP90AA1	SNAP91	PSMA3	SMC1A			NAP1L1	PLXNA1	ENSG00000001617	ENSG00000001617	ENSG00000001561	ENSG00000001617
RPS5	MPPED2	MYL12A	ADD2			RPS4X	APC2	ENSG00000001629	ENSG00000001629	ENSG00000001617	ENSG00000001629
GSTP1	PDZD4	RPS19	RASAL2			MT-RNR2	KIF21B	ENSG00000001630	ENSG00000001630	ENSG00000001629	ENSG00000001630
FTL	FRY	BUD31	DCX				MAP7D1	ENSG00000001631	ENSG00000001631	ENSG00000001630	ENSG00000001631
RPL6	RASAL2	MRPL32	MAP2				PCDH17	ENSG00000002016	ENSG00000002016	ENSG00000001631	ENSG00000002016
RPLP0	MAP2	RPL34	GNAO1				BAZ2B	ENSG00000002330	ENSG00000002330	ENSG00000002016	ENSG00000002330
NDUFB2	KIF3C	RPS13	CPXM1				TRIM28	ENSG00000002549	ENSG00000002549	ENSG00000002330	ENSG00000002549
HNRNPC	ITGA6	MRPL51	DLL3				DLG4	ENSG00000002587	ENSG00000002746	ENSG00000002549	ENSG00000002587
DSP	FMR1	C12orf57	SCD				SYT4	ENSG00000002746	ENSG00000002822	ENSG00000002587	ENSG00000002746
RANBP1	HERC1	TMEM14C	NRP1				EPHB2	ENSG00000002822	ENSG00000002834	ENSG00000002746	ENSG00000002822
FKBP3	CLIP3	RPS12	EEF1A2				FADS2	ENSG00000002834	ENSG00000002919	ENSG00000002822	ENSG00000002834
PSMA3	ITGB8	COX7A2	FMR1				TUBB2A	ENSG00000002919	ENSG00000003056	ENSG00000002834	ENSG00000002919
ERH	SORCS1	AMOTL2	NALCN				MAP1LC3B	ENSG00000002933	ENSG00000003096	ENSG00000002919	ENSG00000003056
PSMB5	SLC1A2	RPL24	NDRG4				PTPRF	ENSG00000003056	ENSG00000003147	ENSG00000003056	ENSG00000003096
APEX1	CEP85L	IFT57	STMN2				SON	ENSG00000003096	ENSG00000003249	ENSG00000003096	ENSG00000003137
MYL12A	PCDHB15	EEF1B2	GPI				CELF3	ENSG00000003137	ENSG00000003393	ENSG00000003137	ENSG00000003147
SMS	ST8SIA4	SF3B6	SHD				RALGDS	ENSG00000003147	ENSG00000003402	ENSG00000003147	ENSG00000003249
EIF3E	APC2	IGFBP2	ATP1A3				GRIK3	ENSG00000003249	ENSG00000003436	ENSG00000003249	ENSG00000003393
RPS16	CNR1	HSPE1	MPP2				FASN	ENSG00000003393	ENSG00000003509	ENSG00000003393	ENSG00000003402
RPS19	CCNI	CACYBP	NRXN2				WDR6	ENSG00000003402	ENSG00000003756	ENSG00000003402	ENSG00000003509
RPA3	GRIA2	PRDX1	KIAA1549L				PACS2	ENSG00000003436	ENSG00000003987	ENSG00000003436	ENSG00000003756
NPM3	EFNB2	CNN3	ENO2				SHTN1	ENSG00000003509	ENSG00000003989	ENSG00000003509	ENSG00000003987
RPL19	NCAN	RPS25	RFX4				ZNF33A	ENSG00000003756	ENSG00000004059	ENSG00000003756	ENSG00000003989
RPL34	KIF1A	SLIRP	VEGFA				MT-ND5	ENSG00000003987	ENSG00000004139	ENSG00000003987	ENSG00000004059
CTSC	GSE1	RPL21	KIF21B				MT-ND1	ENSG00000003989	ENSG00000004142	ENSG00000004059	ENSG00000004139
HSPA8	DCLK1	PFDN5	LGALS8				PRRC2A	ENSG00000004059	ENSG00000004399	ENSG00000004139	ENSG00000004142
CCND1	EPHB2	CKS2	HPCAL4				MT-ND4L	ENSG00000004139	ENSG00000004455	ENSG00000004142	ENSG00000004455
RPS13	MEIS2	ATP5E	CCNI				AC099786.2	ENSG00000004142	ENSG00000004478	ENSG00000004455	ENSG00000004478
MRPL51	KIDINS220	RPL23	KLF12				TXNIP	ENSG00000004399	ENSG00000004487	ENSG00000004478	ENSG00000004487
C12orf57	APC	SNRPD2	GRIA2				NEFL	ENSG00000004455	ENSG00000004534	ENSG00000004487	ENSG00000004534
LDHB	PLXNC1	COX7C	OBSL1					ENSG00000004478	ENSG00000004660	ENSG00000004534	ENSG00000004660
COX6A1	SLCO5A1	SEM1	SOX9					ENSG00000004487	ENSG00000004700	ENSG00000004660	ENSG00000004700
HDDC2	LEF1	AJUBA	FLRT3					ENSG00000004534	ENSG00000004766	ENSG00000004700	ENSG00000004766
RPS12	NCOA2	COX7B	FOXP2					ENSG00000004660	ENSG00000004776	ENSG00000004766	ENSG00000004777
GMNN	SGSM2	RPL27	MAP1B					ENSG00000004700	ENSG00000004777	ENSG00000004777	ENSG00000004779
COX7A2	PRKACB	LIN28A	SBF2					ENSG00000004766	ENSG00000004779	ENSG00000004779	ENSG00000004838
RPL24	UNC80	POMP	NREP					ENSG00000004777	ENSG00000004838	ENSG00000004838	ENSG00000004848
MRPL3	MEGF10	TPT1	GAD2					ENSG00000004779	ENSG00000004848	ENSG00000004848	ENSG00000004864
EEF1B2	CREB5	CCNB1	PARP6					ENSG00000004799	ENSG00000004864	ENSG00000004864	ENSG00000004866
HSPE1	NCAM1	CNTN6	SMARCC2					ENSG00000004838	ENSG00000004866	ENSG00000004866	ENSG00000004897
SDC1	GPM6A	RPS15A	RTN1					ENSG00000004848	ENSG00000004897	ENSG00000004897	ENSG00000004948
PARK7	PTPRO	MDM2	SSH2					ENSG00000004864	ENSG00000004948	ENSG00000004948	ENSG00000004961
MRPS15	CADM3	USP44	PRKACB					ENSG00000004866	ENSG00000004961	ENSG00000004961	ENSG00000004975
PRDX1	ZNF704	TXN	UNC80					ENSG00000004897	ENSG00000004975	ENSG00000004975	ENSG00000005007
CNN3	FAM219A	RPL35	PAM					ENSG00000004948	ENSG00000005007	ENSG00000005007	ENSG00000005020
DPH5	MAP1A	RPS6	MEGF10					ENSG00000004961	ENSG00000005020	ENSG00000005020	ENSG00000005022
PRDX6	CHD3	RPS24	CLVS2					ENSG00000004975	ENSG00000005022	ENSG00000005022	ENSG00000005059
RPS25	MAP6	SERF2	INA					ENSG00000005007	ENSG00000005059	ENSG00000005059	ENSG00000005075
NDUFB3	TNKS	SRP14	NCAM1					ENSG00000005020	ENSG00000005075	ENSG00000005075	ENSG00000005100
NPC2	STOX2	SOD1	ALDOA					ENSG00000005022	ENSG00000005100	ENSG00000005100	ENSG00000005108
SLIRP	USF3	RPS11	AKAP6					ENSG00000005059	ENSG00000005108	ENSG00000005102	ENSG00000005156
EXOSC8	AMBN	RPL11	PTPRO					ENSG00000005075	ENSG00000005156	ENSG00000005108	ENSG00000005175
RPL21	CSRNP3	NME7	PLOD2					ENSG00000005100	ENSG00000005175	ENSG00000005156	ENSG00000005187
PRDX4	MTURN	RPS27A	SCN3A					ENSG00000005108	ENSG00000005187	ENSG00000005175	ENSG00000005189
PFDN5	ZBTB20	SNRPG	FEZF2					ENSG00000005156	ENSG00000005189	ENSG00000005189	ENSG00000005194
CKS2	PLCB1	RPS3A	KIF5A					ENSG00000005175	ENSG00000005194	ENSG00000005194	ENSG00000005206
ATP5E	KCNQ3	RPL37	RHPN1					ENSG00000005187	ENSG00000005206	ENSG00000005206	ENSG00000005238
HIST1H1D	ROBO2	PLK2	STC1					ENSG00000005189	ENSG00000005238	ENSG00000005238	ENSG00000005243
HIST1H2BJ	LSAMP	ABRACL	HK2					ENSG00000005194	ENSG00000005243	ENSG00000005243	ENSG00000005249
MEA1	PBX1	C7orf50	CELF3					ENSG00000005206	ENSG00000005249	ENSG00000005249	ENSG00000005302
NDUFA1	PCLO	RPL7	ZSWIM5					ENSG00000005238	ENSG00000005302	ENSG00000005302	ENSG00000005339
RPL23	TET3	EIF3M	AK4					ENSG00000005243	ENSG00000005339	ENSG00000005339	ENSG00000005379
SNRPD2	DNER	CWC15	LHX8					ENSG00000005249	ENSG00000005379	ENSG00000005379	ENSG00000005436
SNRPB	FSIP2	PRSS23	ADGRV1					ENSG00000005302	ENSG00000005436	ENSG00000005436	ENSG00000005448
SNRPB2	ARHGEF12	CCT5	AMER2					ENSG00000005339	ENSG00000005448	ENSG00000005448	ENSG00000005469
COX7C	NOL4L	GJA1	TTYH1					ENSG00000005379	ENSG00000005469	ENSG00000005469	ENSG00000005483
SEM1	RORB	C14orf2	KIF5C					ENSG00000005421	ENSG00000005471	ENSG00000005483	ENSG00000005486
ATF4	MIAT	UQCRB	COL22A1					ENSG00000005436	ENSG00000005483	ENSG00000005486	ENSG00000005513
TXNDC17	PEG10	RPL30	HGNC:24955					ENSG00000005448	ENSG00000005486	ENSG00000005513	ENSG00000005700
MPDU1	LINC00461	HIST1H2BD	RNF150					ENSG00000005469	ENSG00000005513	ENSG00000005700	ENSG00000005801
RPS4Y1	MALAT1	RPL26	GAP43					ENSG00000005471	ENSG00000005700	ENSG00000005801	ENSG00000005810
RPL36	MIR124-2HG	RPL29	AHSA2					ENSG00000005483	ENSG00000005801	ENSG00000005810	ENSG00000005812
LSM7	KIAA1147	RPL22L1	TNKS					ENSG00000005486	ENSG00000005810	ENSG00000005812	ENSG00000005882
LSM4	KC6	RPL9	ST8SIA3					ENSG00000005513	ENSG00000005812	ENSG00000005882	ENSG00000005884
RPL27	UG0898H09	H2AFZ	JUN					ENSG00000005700	ENSG00000005882	ENSG00000005884	ENSG00000005889
PCNA		HMGB2	CSRNP3					ENSG00000005801	ENSG00000005884	ENSG00000005889	ENSG00000005893
POMP		GPX8	NRXN1					ENSG00000005810	ENSG00000005889	ENSG00000005893	ENSG00000005961
TPT1		RPS14	PLCB1					ENSG00000005812	ENSG00000005893	ENSG00000005961	ENSG00000006007
CCNB1		COX6C	KCNH8					ENSG00000005882	ENSG00000005961	ENSG00000005981	ENSG00000006015
RPS15A		RPL36AL	PCDH9					ENSG00000005884	ENSG00000006007	ENSG00000006007	ENSG00000006016
TMEM258		RPL27A	NRBP2					ENSG00000005889	ENSG00000006015	ENSG00000006015	ENSG00000006025
CDK4		B2M	LSAMP					ENSG00000005893	ENSG00000006016	ENSG00000006016	ENSG00000006042
LAMC1		ATP5H	MAPT					ENSG00000005961	ENSG00000006025	ENSG00000006025	ENSG00000006047
COX5B		HIST1H1E	DCC					ENSG00000006007	ENSG00000006042	ENSG00000006042	ENSG00000006062
TXN		NDUFS5	FSIP2					ENSG00000006015	ENSG00000006047	ENSG00000006047	ENSG00000006071
RPL35		ATP5I	MSL1					ENSG00000006025	ENSG00000006062	ENSG00000006062	ENSG00000006116
RPS6		UBB	MYT1					ENSG00000006042	ENSG00000006071	ENSG00000006071	ENSG00000006118
PPIL1		KRT8	DYNC1H1					ENSG00000006047	ENSG00000006118	ENSG00000006116	ENSG00000006125
HMGA1		PFKFB3	ZNF536					ENSG00000006062	ENSG00000006125	ENSG00000006118	ENSG00000006128
MRPL15		LSM3	L1CAM					ENSG00000006071	ENSG00000006128	ENSG00000006125	ENSG00000006194
THBS1		RPS9	XKR4					ENSG00000006116	ENSG00000006194	ENSG00000006128	ENSG00000006210
RPLP1		RPS21	GPC2					ENSG00000006118	ENSG00000006210	ENSG00000006194	ENSG00000006282
RPS24		RPS7	MIAT					ENSG00000006125	ENSG00000006282	ENSG00000006210	ENSG00000006283
METTL5		MRPL13	C14orf132					ENSG00000006128	ENSG00000006283	ENSG00000006282	ENSG00000006327
SSB		RPL38	MALAT1					ENSG00000006194	ENSG00000006327	ENSG00000006283	ENSG00000006377
FBN2		UQCRH	LINC00599					ENSG00000006210	ENSG00000006377	ENSG00000006327	ENSG00000006432
SRP14		USMG5	PRKDC					ENSG00000006282	ENSG00000006432	ENSG00000006377	ENSG00000006451
ETFA		IGDCC3	PCDHGB4					ENSG00000006283	ENSG00000006451	ENSG00000006432	ENSG00000006453
RPS2		CSRP2	MIR124-2HG					ENSG00000006327	ENSG00000006453	ENSG00000006451	ENSG00000006459
SOD1		RPS27	MAGEL2					ENSG00000006377	ENSG00000006459	ENSG00000006453	ENSG00000006468
RPS11		MLF1	MIR100HG					ENSG00000006432	ENSG00000006468	ENSG00000006459	ENSG00000006530
RPL13A		HIST1H2AC	MIR9-3HG					ENSG00000006451	ENSG00000006530	ENSG00000006468	ENSG00000006576
RPL11		NPM1	SPON1					ENSG00000006453	ENSG00000006576	ENSG00000006530	ENSG00000006607
RPS8		SNRPE	AC110285.2					ENSG00000006459	ENSG00000006607	ENSG00000006576	ENSG00000006625
UFC1		NOP10	KC6					ENSG00000006468	ENSG00000006625	ENSG00000006607	ENSG00000006634
ILF2		RPS17	UG0898H09					ENSG00000006530	ENSG00000006634	ENSG00000006625	ENSG00000006652
RPS27A		RPL35A						ENSG00000006576	ENSG00000006652	ENSG00000006634	ENSG00000006695
SNRPG		HIST2H2AB						ENSG00000006607	ENSG00000006695	ENSG00000006652	ENSG00000006704
HSPD1		NDUFA6						ENSG00000006625	ENSG00000006704	ENSG00000006695	ENSG00000006712
RPL32		RPS27L						ENSG00000006634	ENSG00000006712	ENSG00000006704	ENSG00000006715
RPS3A		HIST1H2BL						ENSG00000006652	ENSG00000006715	ENSG00000006712	ENSG00000006740
RPL37		TCEAL9						ENSG00000006695	ENSG00000006740	ENSG00000006715	ENSG00000006744
PLK2		COMMD6						ENSG00000006704	ENSG00000006744	ENSG00000006740	ENSG00000006756
ABRACL		NDUFA4						ENSG00000006712	ENSG00000006756	ENSG00000006744	ENSG00000006757
HTR2C		BLOC1S2						ENSG00000006715	ENSG00000006757	ENSG00000006756	ENSG00000006831
GPC3		NACA						ENSG00000006740	ENSG00000006831	ENSG00000006757	ENSG00000006837
RPL7		HIST1H4C						ENSG00000006744	ENSG00000006837	ENSG00000006831	ENSG00000007047
NDUFB9		RPL37A						ENSG00000006756	ENSG00000007047	ENSG00000006837	ENSG00000007062
RPL7A		RPL12						ENSG00000006757	ENSG00000007062	ENSG00000007001	ENSG00000007080
SERPINH1		RPL23A						ENSG00000006831	ENSG00000007080	ENSG00000007047	ENSG00000007168
RPS3		UBL5						ENSG00000006837	ENSG00000007168	ENSG00000007062	ENSG00000007171
TAGLN		RPL10A						ENSG00000007047	ENSG00000007171	ENSG00000007080	ENSG00000007174
FAU		OSTC						ENSG00000007062	ENSG00000007202	ENSG00000007129	ENSG00000007202
PRSS23		RNU5E-1						ENSG00000007080	ENSG00000007237	ENSG00000007168	ENSG00000007237
CCT5		SNORA73B						ENSG00000007168	ENSG00000007255	ENSG00000007171	ENSG00000007255
TIMM8B		RN7SKP255						ENSG00000007171	ENSG00000007264	ENSG00000007174	ENSG00000007264
CENPU		SNORA63						ENSG00000007174	ENSG00000007314	ENSG00000007202	ENSG00000007341
HAUS1		RNU4-1						ENSG00000007202	ENSG00000007341	ENSG00000007237	ENSG00000007372
GJA1		RNU4-2						ENSG00000007237	ENSG00000007372	ENSG00000007255	ENSG00000007376
NIFK		RNVU1-15						ENSG00000007255	ENSG00000007376	ENSG00000007264	ENSG00000007384
C14orf2		SNORD15B						ENSG00000007264	ENSG00000007384	ENSG00000007341	ENSG00000007392
UQCRB		SNORA49						ENSG00000007341	ENSG00000007392	ENSG00000007372	ENSG00000007402
RPL30		MT-RNR1						ENSG00000007350	ENSG00000007402	ENSG00000007376	ENSG00000007516
HIST1H2BD		U3						ENSG00000007372	ENSG00000007516	ENSG00000007384	ENSG00000007520
HIST1H4H		SNORD17						ENSG00000007376	ENSG00000007520	ENSG00000007392	ENSG00000007541
ATP5G1		SNORA74B						ENSG00000007384	ENSG00000007541	ENSG00000007402	ENSG00000007545
NAE1		SNORA53						ENSG00000007392	ENSG00000007545	ENSG00000007516	ENSG00000007866
RPL8		RPS29						ENSG00000007402	ENSG00000007866	ENSG00000007520	ENSG00000007923
RPL26		TOMM6						ENSG00000007516	ENSG00000007923	ENSG00000007541	ENSG00000007944
RPL29		SNORA79B						ENSG00000007520	ENSG00000007944	ENSG00000007545	ENSG00000007968
CCT3		RPL41						ENSG00000007541	ENSG00000007968	ENSG00000007866	ENSG00000008018
RPL22L1		RPS18						ENSG00000007545	ENSG00000008018	ENSG00000007923	ENSG00000008056
RPL9		Z74021.1						ENSG00000007866	ENSG00000008056	ENSG00000007944	ENSG00000008083
GNL3		GPX1						ENSG00000007923	ENSG00000008083	ENSG00000007968	ENSG00000008086
H2AFZ		SNORD97						ENSG00000007944	ENSG00000008086	ENSG00000008018	ENSG00000008118
HMGB2		SCARNA7						ENSG00000007968	ENSG00000008118	ENSG00000008056	ENSG00000008130
NDUFS4		SNORD10						ENSG00000008018	ENSG00000008130	ENSG00000008083	ENSG00000008256
GPX8		SCARNA5						ENSG00000008056	ENSG00000008226	ENSG00000008086	ENSG00000008277
RPS14		AC084082.1						ENSG00000008083	ENSG00000008256	ENSG00000008118	ENSG00000008282
PTTG1		AC051619.8						ENSG00000008086	ENSG00000008277	ENSG00000008130	ENSG00000008283
COX6C		RN7SL4P						ENSG00000008118	ENSG00000008282	ENSG00000008196	ENSG00000008294
RPL36AL		SNORD3A						ENSG00000008130	ENSG00000008283	ENSG00000008256	ENSG00000008300
OTX2		RN7SL2						ENSG00000008226	ENSG00000008294	ENSG00000008277	ENSG00000008311
PSMC3		HIST1H3E						ENSG00000008256	ENSG00000008300	ENSG00000008282	ENSG00000008324
RPL27A		HIST1H2BH						ENSG00000008277	ENSG00000008311	ENSG00000008283	ENSG00000008382
PHB		HIST1H4E						ENSG00000008282	ENSG00000008324	ENSG00000008294	ENSG00000008394
ATP5H		HIST1H2BF						ENSG00000008283	ENSG00000008382	ENSG00000008300	ENSG00000008405
RPSA		HIST1H2AM						ENSG00000008294	ENSG00000008394	ENSG00000008311	ENSG00000008513
HIST1H1E		RN7SL3						ENSG00000008300	ENSG00000008405	ENSG00000008324	ENSG00000008710
NDUFS5								ENSG00000008311	ENSG00000008513	ENSG00000008382	ENSG00000008735
ATP5I								ENSG00000008324	ENSG00000008710	ENSG00000008394	ENSG00000008838
MRPL1								ENSG00000008382	ENSG00000008735	ENSG00000008405	ENSG00000008853
UBB								ENSG00000008394	ENSG00000008838	ENSG00000008513	ENSG00000008869
KRT8								ENSG00000008405	ENSG00000008853	ENSG00000008517	ENSG00000008952
TRIAP1								ENSG00000008513	ENSG00000008869	ENSG00000008710	ENSG00000008988
LSM3								ENSG00000008710	ENSG00000008952	ENSG00000008735	ENSG00000009307
RPS9								ENSG00000008735	ENSG00000008988	ENSG00000008838	ENSG00000009335
TBCA								ENSG00000008838	ENSG00000009307	ENSG00000008853	ENSG00000009413
RPS21								ENSG00000008853	ENSG00000009335	ENSG00000008869	ENSG00000009694
RPS7								ENSG00000008869	ENSG00000009413	ENSG00000008952	ENSG00000009780
MRPL13								ENSG00000008952	ENSG00000009694	ENSG00000008988	ENSG00000009830
RPL38								ENSG00000008988	ENSG00000009780	ENSG00000009307	ENSG00000009844
TRMT112								ENSG00000009307	ENSG00000009830	ENSG00000009335	ENSG00000009954
CKS1B								ENSG00000009335	ENSG00000009844	ENSG00000009413	ENSG00000010017
UQCRH								ENSG00000009413	ENSG00000009954	ENSG00000009694	ENSG00000010072
USMG5								ENSG00000009694	ENSG00000010017	ENSG00000009780	ENSG00000010165
GNG5								ENSG00000009709	ENSG00000010072	ENSG00000009830	ENSG00000010219
MRPL11								ENSG00000009780	ENSG00000010165	ENSG00000009844	ENSG00000010244
CSRP2								ENSG00000009830	ENSG00000010219	ENSG00000009954	ENSG00000010256
MRPL48								ENSG00000009844	ENSG00000010244	ENSG00000010017	ENSG00000010270
RPS27								ENSG00000009954	ENSG00000010256	ENSG00000010072	ENSG00000010292
SELENOW								ENSG00000010017	ENSG00000010270	ENSG00000010165	ENSG00000010295
CALR								ENSG00000010072	ENSG00000010278	ENSG00000010219	ENSG00000010310
HIST1H2AC								ENSG00000010165	ENSG00000010292	ENSG00000010244	ENSG00000010318
HIST1H2BC								ENSG00000010219	ENSG00000010295	ENSG00000010256	ENSG00000010322
PPA1								ENSG00000010244	ENSG00000010310	ENSG00000010270	ENSG00000010361
AEN								ENSG00000010256	ENSG00000010318	ENSG00000010278	ENSG00000010404
NPM1								ENSG00000010270	ENSG00000010322	ENSG00000010292	ENSG00000010539
SNRPE								ENSG00000010278	ENSG00000010361	ENSG00000010295	ENSG00000010626
NOP10								ENSG00000010292	ENSG00000010404	ENSG00000010310	ENSG00000010803
ANXA2								ENSG00000010295	ENSG00000010539	ENSG00000010318	ENSG00000010810
RPS17								ENSG00000010310	ENSG00000010610	ENSG00000010322	ENSG00000010818
RPL35A								ENSG00000010318	ENSG00000010626	ENSG00000010361	ENSG00000011007
CMSS1								ENSG00000010319	ENSG00000010803	ENSG00000010404	ENSG00000011009
HIST2H2AC								ENSG00000010322	ENSG00000010810	ENSG00000010539	ENSG00000011021
HIST2H2AB								ENSG00000010361	ENSG00000010818	ENSG00000010610	ENSG00000011028
HIST1H1B								ENSG00000010404	ENSG00000011007	ENSG00000010626	ENSG00000011105
ARMCX2								ENSG00000010539	ENSG00000011009	ENSG00000010803	ENSG00000011114
NDUFA6								ENSG00000010610	ENSG00000011021	ENSG00000010810	ENSG00000011132
RPS27L								ENSG00000010626	ENSG00000011028	ENSG00000010818	ENSG00000011143
HIST1H2BL								ENSG00000010704	ENSG00000011105	ENSG00000010932	ENSG00000011198
TCEAL9								ENSG00000010803	ENSG00000011114	ENSG00000011007	ENSG00000011201
RPS23								ENSG00000010810	ENSG00000011132	ENSG00000011009	ENSG00000011243
GCNT1								ENSG00000010818	ENSG00000011143	ENSG00000011021	ENSG00000011258
HIST1H1C								ENSG00000011007	ENSG00000011198	ENSG00000011028	ENSG00000011260
COMMD6								ENSG00000011009	ENSG00000011201	ENSG00000011083	ENSG00000011275
NDUFA4								ENSG00000011021	ENSG00000011243	ENSG00000011105	ENSG00000011295
PPIA								ENSG00000011028	ENSG00000011258	ENSG00000011114	ENSG00000011304
NACA								ENSG00000011105	ENSG00000011260	ENSG00000011132	ENSG00000011332
TOMM7								ENSG00000011114	ENSG00000011275	ENSG00000011143	ENSG00000011347
HIST1H2AI								ENSG00000011132	ENSG00000011295	ENSG00000011198	ENSG00000011376
HIST1H2AG								ENSG00000011143	ENSG00000011304	ENSG00000011201	ENSG00000011405
HIST1H4C								ENSG00000011198	ENSG00000011332	ENSG00000011243	ENSG00000011422
HIST1H3J								ENSG00000011201	ENSG00000011347	ENSG00000011258	ENSG00000011426
RPL37A								ENSG00000011243	ENSG00000011376	ENSG00000011260	ENSG00000011451
HIST1H2BK								ENSG00000011258	ENSG00000011405	ENSG00000011275	ENSG00000011454
RPL12								ENSG00000011260	ENSG00000011422	ENSG00000011295	ENSG00000011478
RPL23A								ENSG00000011275	ENSG00000011426	ENSG00000011304	ENSG00000011485
UBL5								ENSG00000011295	ENSG00000011451	ENSG00000011332	ENSG00000011523
RPL10A								ENSG00000011304	ENSG00000011454	ENSG00000011347	ENSG00000011566
PNP								ENSG00000011332	ENSG00000011478	ENSG00000011376	ENSG00000011638
OSTC								ENSG00000011347	ENSG00000011485	ENSG00000011405	ENSG00000011677
RPL39								ENSG00000011376	ENSG00000011523	ENSG00000011426	ENSG00000012048
SNORA73B								ENSG00000011405	ENSG00000011566	ENSG00000011451	ENSG00000012061
SNORA74A								ENSG00000011422	ENSG00000011638	ENSG00000011454	ENSG00000012171
RACK1								ENSG00000011426	ENSG00000011677	ENSG00000011478	ENSG00000012174
FAM216A								ENSG00000011451	ENSG00000012048	ENSG00000011485	ENSG00000012232
SNORD17								ENSG00000011454	ENSG00000012061	ENSG00000011523	ENSG00000012660
RPS29								ENSG00000011478	ENSG00000012171	ENSG00000011566	ENSG00000012817
UBA52								ENSG00000011485	ENSG00000012174	ENSG00000011638	ENSG00000012822
OST4								ENSG00000011523	ENSG00000012211	ENSG00000011677	ENSG00000012963
RPL41								ENSG00000011566	ENSG00000012232	ENSG00000012048	ENSG00000012983
RPS18								ENSG00000011638	ENSG00000012660	ENSG00000012061	ENSG00000013016
TMA7								ENSG00000011677	ENSG00000012817	ENSG00000012171	ENSG00000013275
GPX1								ENSG00000012048	ENSG00000012822	ENSG00000012174	ENSG00000013288
RPS28								ENSG00000012061	ENSG00000012963	ENSG00000012232	ENSG00000013293
GAS5								ENSG00000012171	ENSG00000012983	ENSG00000012660	ENSG00000013297
NME1								ENSG00000012174	ENSG00000013016	ENSG00000012817	ENSG00000013306
ATP5J2								ENSG00000012211	ENSG00000013275	ENSG00000012822	ENSG00000013364
SNORD3A								ENSG00000012232	ENSG00000013288	ENSG00000012963	ENSG00000013374
HIST1H4K								ENSG00000012660	ENSG00000013297	ENSG00000012983	ENSG00000013375
HIST1H2BM								ENSG00000012779	ENSG00000013306	ENSG00000013016	ENSG00000013392
HIST1H2BG								ENSG00000012817	ENSG00000013364	ENSG00000013275	ENSG00000013441
HIST1H3G								ENSG00000012822	ENSG00000013374	ENSG00000013288	ENSG00000013503
HIST1H3B								ENSG00000012963	ENSG00000013375	ENSG00000013293	ENSG00000013523
HIST1H2BE								ENSG00000012983	ENSG00000013392	ENSG00000013306	ENSG00000013561
HIST1H2BO								ENSG00000013016	ENSG00000013441	ENSG00000013364	ENSG00000013563
HIST1H3E								ENSG00000013275	ENSG00000013503	ENSG00000013374	ENSG00000013573
HIST1H2AH								ENSG00000013288	ENSG00000013523	ENSG00000013375	ENSG00000013583
HIST1H2BH								ENSG00000013293	ENSG00000013561	ENSG00000013392	ENSG00000013619
HIST1H3A								ENSG00000013297	ENSG00000013563	ENSG00000013441	ENSG00000013810
HIST1H4I								ENSG00000013306	ENSG00000013573	ENSG00000013503	ENSG00000014123
HIST1H2AJ								ENSG00000013364	ENSG00000013583	ENSG00000013523	ENSG00000014138
HIST1H2AL								ENSG00000013374	ENSG00000013619	ENSG00000013561	ENSG00000014164
HIST1H4E								ENSG00000013375	ENSG00000013810	ENSG00000013563	ENSG00000014216
HIST1H2AE								ENSG00000013392	ENSG00000014123	ENSG00000013573	ENSG00000014641
HIST1H4D								ENSG00000013441	ENSG00000014138	ENSG00000013583	ENSG00000014824
HIST1H2BF								ENSG00000013503	ENSG00000014164	ENSG00000013619	ENSG00000014919
HIST1H3F								ENSG00000013523	ENSG00000014216	ENSG00000013810	ENSG00000015133
PSMB3								ENSG00000013561	ENSG00000014641	ENSG00000014123	ENSG00000015153
HIST1H2AB								ENSG00000013563	ENSG00000014824	ENSG00000014138	ENSG00000015171
HIST1H2BI								ENSG00000013573	ENSG00000014914	ENSG00000014164	ENSG00000015285
HIST1H4A								ENSG00000013583	ENSG00000014919	ENSG00000014216	ENSG00000015475
HIST1H2AM								ENSG00000013588	ENSG00000015133	ENSG00000014641	ENSG00000015532
HIST1H4B								ENSG00000013619	ENSG00000015153	ENSG00000014824	ENSG00000015592
HIST1H3H								ENSG00000013810	ENSG00000015171	ENSG00000014914	ENSG00000015676
								ENSG00000014123	ENSG00000015285	ENSG00000014919	ENSG00000016082
								ENSG00000014138	ENSG00000015413	ENSG00000015133	ENSG00000016864
								ENSG00000014164	ENSG00000015475	ENSG00000015153	ENSG00000017260
								ENSG00000014216	ENSG00000015479	ENSG00000015171	ENSG00000017797
								ENSG00000014641	ENSG00000015532	ENSG00000015285	ENSG00000018189
								ENSG00000014824	ENSG00000015592	ENSG00000015475	ENSG00000018236
								ENSG00000014914	ENSG00000015676	ENSG00000015532	ENSG00000018408
								ENSG00000014919	ENSG00000016082	ENSG00000015592	ENSG00000018510
								ENSG00000015133	ENSG00000016391	ENSG00000015676	ENSG00000018607
								ENSG00000015153	ENSG00000016864	ENSG00000016082	ENSG00000018610
								ENSG00000015171	ENSG00000017260	ENSG00000016864	ENSG00000018699
								ENSG00000015285	ENSG00000017797	ENSG00000017260	ENSG00000018869
								ENSG00000015475	ENSG00000018189	ENSG00000017797	ENSG00000019102
								ENSG00000015479	ENSG00000018236	ENSG00000018189	ENSG00000019144
								ENSG00000015532	ENSG00000018408	ENSG00000018236	ENSG00000019485
								ENSG00000015592	ENSG00000018510	ENSG00000018408	ENSG00000019505
								ENSG00000015676	ENSG00000018607	ENSG00000018510	ENSG00000019549
								ENSG00000016082	ENSG00000018610	ENSG00000018607	ENSG00000019582
								ENSG00000016391	ENSG00000018625	ENSG00000018610	ENSG00000019995
								ENSG00000016864	ENSG00000018699	ENSG00000018699	ENSG00000020129
								ENSG00000017260	ENSG00000018869	ENSG00000018869	ENSG00000020181
								ENSG00000017797	ENSG00000019144	ENSG00000019144	ENSG00000020256
								ENSG00000018189	ENSG00000019485	ENSG00000019485	ENSG00000020426
								ENSG00000018236	ENSG00000019505	ENSG00000019505	ENSG00000020577
								ENSG00000018408	ENSG00000019549	ENSG00000019549	ENSG00000020922
								ENSG00000018510	ENSG00000019582	ENSG00000019995	ENSG00000021300
								ENSG00000018607	ENSG00000019995	ENSG00000020129	ENSG00000021488
								ENSG00000018610	ENSG00000020129	ENSG00000020181	ENSG00000021574
								ENSG00000018625	ENSG00000020181	ENSG00000020256	ENSG00000021645
								ENSG00000018699	ENSG00000020256	ENSG00000020426	ENSG00000021762
								ENSG00000018869	ENSG00000020426	ENSG00000020577	ENSG00000021776
								ENSG00000019144	ENSG00000020577	ENSG00000020922	ENSG00000021826
								ENSG00000019485	ENSG00000020922	ENSG00000021300	ENSG00000022267
								ENSG00000019505	ENSG00000021300	ENSG00000021488	ENSG00000022277
								ENSG00000019549	ENSG00000021355	ENSG00000021574	ENSG00000022355
								ENSG00000019582	ENSG00000021461	ENSG00000021645	ENSG00000022556
								ENSG00000019995	ENSG00000021488	ENSG00000021762	ENSG00000022567
								ENSG00000020129	ENSG00000021574	ENSG00000021776	ENSG00000022840
								ENSG00000020181	ENSG00000021645	ENSG00000021826	ENSG00000022976
								ENSG00000020256	ENSG00000021762	ENSG00000022267	ENSG00000023041
								ENSG00000020426	ENSG00000021776	ENSG00000022277	ENSG00000023171
								ENSG00000020577	ENSG00000021826	ENSG00000022355	ENSG00000023191
								ENSG00000020922	ENSG00000022267	ENSG00000022556	ENSG00000023228
								ENSG00000021300	ENSG00000022277	ENSG00000022567	ENSG00000023287
								ENSG00000021355	ENSG00000022355	ENSG00000022840	ENSG00000023318
								ENSG00000021488	ENSG00000022556	ENSG00000022976	ENSG00000023330
								ENSG00000021574	ENSG00000022567	ENSG00000023041	ENSG00000023516
								ENSG00000021645	ENSG00000022840	ENSG00000023171	ENSG00000023572
								ENSG00000021762	ENSG00000022976	ENSG00000023191	ENSG00000023608
								ENSG00000021776	ENSG00000023041	ENSG00000023228	ENSG00000023697
								ENSG00000021826	ENSG00000023171	ENSG00000023287	ENSG00000023734
								ENSG00000022267	ENSG00000023191	ENSG00000023318	ENSG00000023839
								ENSG00000022277	ENSG00000023228	ENSG00000023330	ENSG00000023892
								ENSG00000022355	ENSG00000023287	ENSG00000023516	ENSG00000023902
								ENSG00000022556	ENSG00000023318	ENSG00000023572	ENSG00000023909
								ENSG00000022567	ENSG00000023330	ENSG00000023608	ENSG00000024048
								ENSG00000022840	ENSG00000023516	ENSG00000023697	ENSG00000024526
								ENSG00000022976	ENSG00000023572	ENSG00000023734	ENSG00000024862
								ENSG00000023041	ENSG00000023608	ENSG00000023839	ENSG00000025039
								ENSG00000023171	ENSG00000023697	ENSG00000023892	ENSG00000025156
								ENSG00000023191	ENSG00000023734	ENSG00000023902	ENSG00000025293
								ENSG00000023228	ENSG00000023839	ENSG00000023909	ENSG00000025423
								ENSG00000023287	ENSG00000023892	ENSG00000024048	ENSG00000025434
								ENSG00000023318	ENSG00000023902	ENSG00000024526	ENSG00000025770
								ENSG00000023330	ENSG00000023909	ENSG00000024862	ENSG00000025772
								ENSG00000023516	ENSG00000024048	ENSG00000025039	ENSG00000025796
								ENSG00000023572	ENSG00000024526	ENSG00000025156	ENSG00000025800
								ENSG00000023608	ENSG00000024862	ENSG00000025293	ENSG00000026025
								ENSG00000023697	ENSG00000025039	ENSG00000025423	ENSG00000026103
								ENSG00000023734	ENSG00000025156	ENSG00000025434	ENSG00000026297
								ENSG00000023839	ENSG00000025293	ENSG00000025770	ENSG00000026508
								ENSG00000023892	ENSG00000025423	ENSG00000025772	ENSG00000026559
								ENSG00000023902	ENSG00000025434	ENSG00000025796	ENSG00000026652
								ENSG00000023909	ENSG00000025708	ENSG00000025800	ENSG00000026950
								ENSG00000024048	ENSG00000025770	ENSG00000026025	ENSG00000027001
								ENSG00000024526	ENSG00000025772	ENSG00000026103	ENSG00000027644
								ENSG00000024862	ENSG00000025796	ENSG00000026297	ENSG00000027697
								ENSG00000025039	ENSG00000025800	ENSG00000026508	ENSG00000027847
								ENSG00000025156	ENSG00000026025	ENSG00000026559	ENSG00000028116
								ENSG00000025293	ENSG00000026103	ENSG00000026652	ENSG00000028203
								ENSG00000025423	ENSG00000026297	ENSG00000026950	ENSG00000028277
								ENSG00000025434	ENSG00000026559	ENSG00000027001	ENSG00000028310
								ENSG00000025708	ENSG00000026652	ENSG00000027644	ENSG00000028528
								ENSG00000025770	ENSG00000026950	ENSG00000027697	ENSG00000028839
								ENSG00000025772	ENSG00000027001	ENSG00000027847	ENSG00000029153
								ENSG00000025796	ENSG00000027644	ENSG00000028116	ENSG00000029363
								ENSG00000025800	ENSG00000027697	ENSG00000028203	ENSG00000029364
								ENSG00000026025	ENSG00000027847	ENSG00000028277	ENSG00000029534
								ENSG00000026103	ENSG00000027869	ENSG00000028310	ENSG00000029639
								ENSG00000026297	ENSG00000028116	ENSG00000028528	ENSG00000029725
								ENSG00000026559	ENSG00000028137	ENSG00000028839	ENSG00000029993
								ENSG00000026652	ENSG00000028203	ENSG00000029153	ENSG00000030066
								ENSG00000026950	ENSG00000028277	ENSG00000029363	ENSG00000030110
								ENSG00000027001	ENSG00000028310	ENSG00000029364	ENSG00000030419
								ENSG00000027697	ENSG00000028528	ENSG00000029534	ENSG00000030582
								ENSG00000027847	ENSG00000028839	ENSG00000029639	ENSG00000031003
								ENSG00000027869	ENSG00000029153	ENSG00000029725	ENSG00000031691
								ENSG00000028116	ENSG00000029363	ENSG00000029993	ENSG00000031698
								ENSG00000028203	ENSG00000029364	ENSG00000030066	ENSG00000031823
								ENSG00000028277	ENSG00000029639	ENSG00000030110	ENSG00000032219
								ENSG00000028310	ENSG00000029725	ENSG00000030419	ENSG00000032389
								ENSG00000028528	ENSG00000029993	ENSG00000030582	ENSG00000032444
								ENSG00000028839	ENSG00000030066	ENSG00000031003	ENSG00000032742
								ENSG00000029153	ENSG00000030110	ENSG00000031691	ENSG00000033011
								ENSG00000029363	ENSG00000030419	ENSG00000031698	ENSG00000033030
								ENSG00000029364	ENSG00000030582	ENSG00000031823	ENSG00000033050
								ENSG00000029534	ENSG00000031003	ENSG00000032219	ENSG00000033100
								ENSG00000029639	ENSG00000031081	ENSG00000032389	ENSG00000033122
								ENSG00000029725	ENSG00000031691	ENSG00000032444	ENSG00000033170
								ENSG00000029993	ENSG00000031698	ENSG00000032742	ENSG00000033178
								ENSG00000030066	ENSG00000031823	ENSG00000033011	ENSG00000033327
								ENSG00000030110	ENSG00000032219	ENSG00000033030	ENSG00000033627
								ENSG00000030419	ENSG00000032389	ENSG00000033050	ENSG00000033800
								ENSG00000030582	ENSG00000032444	ENSG00000033100	ENSG00000033867
								ENSG00000031003	ENSG00000032742	ENSG00000033122	ENSG00000034053
								ENSG00000031081	ENSG00000033011	ENSG00000033170	ENSG00000034152
								ENSG00000031691	ENSG00000033030	ENSG00000033178	ENSG00000034239
								ENSG00000031698	ENSG00000033050	ENSG00000033327	ENSG00000034510
								ENSG00000031823	ENSG00000033100	ENSG00000033627	ENSG00000034533
								ENSG00000032219	ENSG00000033122	ENSG00000033800	ENSG00000034677
								ENSG00000032389	ENSG00000033170	ENSG00000033867	ENSG00000034693
								ENSG00000032444	ENSG00000033178	ENSG00000034053	ENSG00000034713
								ENSG00000032742	ENSG00000033327	ENSG00000034152	ENSG00000035115
								ENSG00000033011	ENSG00000033627	ENSG00000034239	ENSG00000035141
								ENSG00000033030	ENSG00000033800	ENSG00000034510	ENSG00000035403
								ENSG00000033050	ENSG00000033867	ENSG00000034533	ENSG00000035499
								ENSG00000033100	ENSG00000034053	ENSG00000034677	ENSG00000035681
								ENSG00000033122	ENSG00000034152	ENSG00000034693	ENSG00000035687
								ENSG00000033170	ENSG00000034239	ENSG00000034713	ENSG00000035862
								ENSG00000033178	ENSG00000034510	ENSG00000035115	ENSG00000035928
								ENSG00000033327	ENSG00000034533	ENSG00000035141	ENSG00000036054
								ENSG00000033627	ENSG00000034677	ENSG00000035403	ENSG00000036257
								ENSG00000033800	ENSG00000034693	ENSG00000035499	ENSG00000036448
								ENSG00000033867	ENSG00000034713	ENSG00000035681	ENSG00000036530
								ENSG00000034053	ENSG00000035115	ENSG00000035687	ENSG00000036549
								ENSG00000034152	ENSG00000035141	ENSG00000035862	ENSG00000036565
								ENSG00000034239	ENSG00000035403	ENSG00000035928	ENSG00000037042
								ENSG00000034510	ENSG00000035499	ENSG00000036054	ENSG00000037241
								ENSG00000034533	ENSG00000035681	ENSG00000036257	ENSG00000037474
								ENSG00000034677	ENSG00000035687	ENSG00000036448	ENSG00000037637
								ENSG00000034693	ENSG00000035862	ENSG00000036530	ENSG00000037749
								ENSG00000034713	ENSG00000035928	ENSG00000036549	ENSG00000037757
								ENSG00000035115	ENSG00000036054	ENSG00000036565	ENSG00000037897
								ENSG00000035141	ENSG00000036257	ENSG00000036672	ENSG00000038002
								ENSG00000035403	ENSG00000036448	ENSG00000037042	ENSG00000038210
								ENSG00000035499	ENSG00000036530	ENSG00000037241	ENSG00000038219
								ENSG00000035664	ENSG00000036549	ENSG00000037474	ENSG00000038274
								ENSG00000035681	ENSG00000036565	ENSG00000037637	ENSG00000038295
								ENSG00000035687	ENSG00000036672	ENSG00000037749	ENSG00000038358
								ENSG00000035862	ENSG00000037042	ENSG00000037757	ENSG00000038382
								ENSG00000035928	ENSG00000037241	ENSG00000037897	ENSG00000038427
								ENSG00000036054	ENSG00000037280	ENSG00000038002	ENSG00000038532
								ENSG00000036257	ENSG00000037474	ENSG00000038210	ENSG00000039123
								ENSG00000036448	ENSG00000037637	ENSG00000038219	ENSG00000039139
								ENSG00000036530	ENSG00000037749	ENSG00000038274	ENSG00000039319
								ENSG00000036549	ENSG00000037757	ENSG00000038295	ENSG00000039523
								ENSG00000036565	ENSG00000037897	ENSG00000038358	ENSG00000039560
								ENSG00000036672	ENSG00000038002	ENSG00000038382	ENSG00000039650
								ENSG00000037042	ENSG00000038210	ENSG00000038427	ENSG00000040199
								ENSG00000037241	ENSG00000038219	ENSG00000038532	ENSG00000040275
								ENSG00000037280	ENSG00000038274	ENSG00000039123	ENSG00000040341
								ENSG00000037474	ENSG00000038358	ENSG00000039139	ENSG00000040487
								ENSG00000037637	ENSG00000038382	ENSG00000039319	ENSG00000040531
								ENSG00000037749	ENSG00000038427	ENSG00000039523	ENSG00000040608
								ENSG00000037757	ENSG00000038532	ENSG00000039537	ENSG00000040633
								ENSG00000037897	ENSG00000039123	ENSG00000039560	ENSG00000040731
								ENSG00000038002	ENSG00000039139	ENSG00000039650	ENSG00000040933
								ENSG00000038210	ENSG00000039319	ENSG00000040199	ENSG00000041353
								ENSG00000038219	ENSG00000039523	ENSG00000040275	ENSG00000041357
								ENSG00000038274	ENSG00000039560	ENSG00000040341	ENSG00000041515
								ENSG00000038358	ENSG00000039600	ENSG00000040487	ENSG00000041802
								ENSG00000038382	ENSG00000039650	ENSG00000040531	ENSG00000041880
								ENSG00000038427	ENSG00000040199	ENSG00000040608	ENSG00000041982
								ENSG00000038532	ENSG00000040275	ENSG00000040633	ENSG00000041988
								ENSG00000039123	ENSG00000040341	ENSG00000040731	ENSG00000042088
								ENSG00000039139	ENSG00000040487	ENSG00000040933	ENSG00000042286
								ENSG00000039319	ENSG00000040531	ENSG00000041353	ENSG00000042317
								ENSG00000039523	ENSG00000040608	ENSG00000041357	ENSG00000042429
								ENSG00000039560	ENSG00000040633	ENSG00000041515	ENSG00000042445
								ENSG00000039650	ENSG00000040731	ENSG00000041802	ENSG00000042753
								ENSG00000040199	ENSG00000040933	ENSG00000041880	ENSG00000042781
								ENSG00000040275	ENSG00000041353	ENSG00000041982	ENSG00000043093
								ENSG00000040341	ENSG00000041357	ENSG00000041988	ENSG00000043143
								ENSG00000040487	ENSG00000041515	ENSG00000042088	ENSG00000043355
								ENSG00000040531	ENSG00000041802	ENSG00000042286	ENSG00000043514
								ENSG00000040608	ENSG00000041880	ENSG00000042304	ENSG00000043591
								ENSG00000040633	ENSG00000041982	ENSG00000042317	ENSG00000044090
								ENSG00000040731	ENSG00000041988	ENSG00000042429	ENSG00000044115
								ENSG00000040933	ENSG00000042062	ENSG00000042445	ENSG00000044446
								ENSG00000041353	ENSG00000042088	ENSG00000042753	ENSG00000044459
								ENSG00000041357	ENSG00000042317	ENSG00000042781	ENSG00000044524
								ENSG00000041515	ENSG00000042429	ENSG00000043039	ENSG00000044574
								ENSG00000041802	ENSG00000042445	ENSG00000043093	ENSG00000046604
								ENSG00000041880	ENSG00000042493	ENSG00000043143	ENSG00000046647
								ENSG00000041982	ENSG00000042753	ENSG00000043355	ENSG00000046651
								ENSG00000041988	ENSG00000042781	ENSG00000043462	ENSG00000046653
								ENSG00000042062	ENSG00000043093	ENSG00000043514	ENSG00000046889
								ENSG00000042088	ENSG00000043143	ENSG00000044090	ENSG00000047056
								ENSG00000042286	ENSG00000043355	ENSG00000044115	ENSG00000047188
								ENSG00000042317	ENSG00000043514	ENSG00000044446	ENSG00000047230
								ENSG00000042429	ENSG00000044090	ENSG00000044459	ENSG00000047249
								ENSG00000042445	ENSG00000044115	ENSG00000044524	ENSG00000047315
								ENSG00000042493	ENSG00000044446	ENSG00000044574	ENSG00000047346
								ENSG00000042753	ENSG00000044459	ENSG00000046604	ENSG00000047365
								ENSG00000043093	ENSG00000044524	ENSG00000046647	ENSG00000047410
								ENSG00000043143	ENSG00000044574	ENSG00000046651	ENSG00000047578
								ENSG00000043355	ENSG00000046604	ENSG00000046653	ENSG00000047579
								ENSG00000043514	ENSG00000046647	ENSG00000046889	ENSG00000047597
								ENSG00000044090	ENSG00000046651	ENSG00000047056	ENSG00000047617
								ENSG00000044115	ENSG00000046653	ENSG00000047188	ENSG00000047621
								ENSG00000044446	ENSG00000046889	ENSG00000047230	ENSG00000047634
								ENSG00000044459	ENSG00000047056	ENSG00000047249	ENSG00000047644
								ENSG00000044524	ENSG00000047188	ENSG00000047315	ENSG00000047849
								ENSG00000044574	ENSG00000047230	ENSG00000047346	ENSG00000047932
								ENSG00000046604	ENSG00000047249	ENSG00000047365	ENSG00000048028
								ENSG00000046647	ENSG00000047315	ENSG00000047410	ENSG00000048052
								ENSG00000046651	ENSG00000047346	ENSG00000047457	ENSG00000048140
								ENSG00000046653	ENSG00000047365	ENSG00000047578	ENSG00000048162
								ENSG00000046889	ENSG00000047410	ENSG00000047579	ENSG00000048342
								ENSG00000047056	ENSG00000047578	ENSG00000047597	ENSG00000048392
								ENSG00000047188	ENSG00000047579	ENSG00000047617	ENSG00000048405
								ENSG00000047230	ENSG00000047597	ENSG00000047621	ENSG00000048471
								ENSG00000047249	ENSG00000047617	ENSG00000047634	ENSG00000048540
								ENSG00000047315	ENSG00000047621	ENSG00000047644	ENSG00000048544
								ENSG00000047346	ENSG00000047634	ENSG00000047648	ENSG00000048545
								ENSG00000047365	ENSG00000047644	ENSG00000047662	ENSG00000048649
								ENSG00000047410	ENSG00000047648	ENSG00000047849	ENSG00000048707
								ENSG00000047578	ENSG00000047849	ENSG00000047932	ENSG00000048740
								ENSG00000047579	ENSG00000047932	ENSG00000048028	ENSG00000048828
								ENSG00000047597	ENSG00000048028	ENSG00000048052	ENSG00000048991
								ENSG00000047617	ENSG00000048052	ENSG00000048140	ENSG00000049089
								ENSG00000047621	ENSG00000048140	ENSG00000048162	ENSG00000049130
								ENSG00000047634	ENSG00000048162	ENSG00000048342	ENSG00000049167
								ENSG00000047644	ENSG00000048342	ENSG00000048392	ENSG00000049192
								ENSG00000047648	ENSG00000048392	ENSG00000048405	ENSG00000049239
								ENSG00000047849	ENSG00000048405	ENSG00000048471	ENSG00000049245
								ENSG00000047932	ENSG00000048471	ENSG00000048540	ENSG00000049246
								ENSG00000048028	ENSG00000048540	ENSG00000048544	ENSG00000049247
								ENSG00000048052	ENSG00000048544	ENSG00000048545	ENSG00000049283
								ENSG00000048140	ENSG00000048545	ENSG00000048649	ENSG00000049323
								ENSG00000048162	ENSG00000048649	ENSG00000048707	ENSG00000049449
								ENSG00000048342	ENSG00000048707	ENSG00000048740	ENSG00000049540
								ENSG00000048392	ENSG00000048740	ENSG00000048828	ENSG00000049541
								ENSG00000048405	ENSG00000048828	ENSG00000048991	ENSG00000049618
								ENSG00000048471	ENSG00000048991	ENSG00000049089	ENSG00000049656
								ENSG00000048540	ENSG00000049089	ENSG00000049130	ENSG00000049759
								ENSG00000048544	ENSG00000049130	ENSG00000049167	ENSG00000049768
								ENSG00000048545	ENSG00000049167	ENSG00000049192	ENSG00000049769
								ENSG00000048649	ENSG00000049192	ENSG00000049239	ENSG00000049860
								ENSG00000048707	ENSG00000049239	ENSG00000049245	ENSG00000049883
								ENSG00000048740	ENSG00000049245	ENSG00000049246	ENSG00000050030
								ENSG00000048828	ENSG00000049246	ENSG00000049247	ENSG00000050130
								ENSG00000048991	ENSG00000049323	ENSG00000049283	ENSG00000050165
								ENSG00000049089	ENSG00000049449	ENSG00000049323	ENSG00000050344
								ENSG00000049130	ENSG00000049540	ENSG00000049449	ENSG00000050393
								ENSG00000049167	ENSG00000049541	ENSG00000049540	ENSG00000050405
								ENSG00000049192	ENSG00000049618	ENSG00000049541	ENSG00000050426
								ENSG00000049239	ENSG00000049656	ENSG00000049618	ENSG00000050438
								ENSG00000049245	ENSG00000049759	ENSG00000049656	ENSG00000050628
								ENSG00000049246	ENSG00000049769	ENSG00000049759	ENSG00000050748
								ENSG00000049323	ENSG00000049860	ENSG00000049768	ENSG00000050820
								ENSG00000049449	ENSG00000049883	ENSG00000049769	ENSG00000051009
								ENSG00000049540	ENSG00000050030	ENSG00000049860	ENSG00000051108
								ENSG00000049541	ENSG00000050130	ENSG00000049883	ENSG00000051128
								ENSG00000049618	ENSG00000050165	ENSG00000050030	ENSG00000051180
								ENSG00000049656	ENSG00000050344	ENSG00000050130	ENSG00000051341
								ENSG00000049759	ENSG00000050393	ENSG00000050165	ENSG00000051382
								ENSG00000049768	ENSG00000050405	ENSG00000050344	ENSG00000051523
								ENSG00000049769	ENSG00000050426	ENSG00000050393	ENSG00000051596
								ENSG00000049860	ENSG00000050438	ENSG00000050405	ENSG00000051620
								ENSG00000049883	ENSG00000050748	ENSG00000050426	ENSG00000051825
								ENSG00000050030	ENSG00000050820	ENSG00000050438	ENSG00000052126
								ENSG00000050130	ENSG00000051009	ENSG00000050628	ENSG00000052723
								ENSG00000050165	ENSG00000051108	ENSG00000050730	ENSG00000052749
								ENSG00000050344	ENSG00000051128	ENSG00000050748	ENSG00000052795
								ENSG00000050393	ENSG00000051180	ENSG00000050820	ENSG00000052802
								ENSG00000050405	ENSG00000051341	ENSG00000051009	ENSG00000052841
								ENSG00000050426	ENSG00000051382	ENSG00000051108	ENSG00000053108
								ENSG00000050438	ENSG00000051523	ENSG00000051128	ENSG00000053254
								ENSG00000050628	ENSG00000051596	ENSG00000051180	ENSG00000053328
								ENSG00000050748	ENSG00000051620	ENSG00000051341	ENSG00000053371
								ENSG00000050820	ENSG00000051825	ENSG00000051382	ENSG00000053372
								ENSG00000051009	ENSG00000052126	ENSG00000051523	ENSG00000053438
								ENSG00000051108	ENSG00000052723	ENSG00000051596	ENSG00000053501
								ENSG00000051128	ENSG00000052749	ENSG00000051620	ENSG00000053524
								ENSG00000051180	ENSG00000052795	ENSG00000051825	ENSG00000053770
								ENSG00000051341	ENSG00000052802	ENSG00000052126	ENSG00000053900
								ENSG00000051382	ENSG00000052841	ENSG00000052723	ENSG00000054116
								ENSG00000051523	ENSG00000053254	ENSG00000052749	ENSG00000054118
								ENSG00000051596	ENSG00000053328	ENSG00000052795	ENSG00000054148
								ENSG00000051620	ENSG00000053371	ENSG00000052802	ENSG00000054267
								ENSG00000051825	ENSG00000053372	ENSG00000052841	ENSG00000054277
								ENSG00000052126	ENSG00000053438	ENSG00000053108	ENSG00000054282
								ENSG00000052344	ENSG00000053501	ENSG00000053254	ENSG00000054356
								ENSG00000052723	ENSG00000053524	ENSG00000053371	ENSG00000054392
								ENSG00000052749	ENSG00000053770	ENSG00000053372	ENSG00000054523
								ENSG00000052795	ENSG00000053900	ENSG00000053438	ENSG00000054611
								ENSG00000052802	ENSG00000053918	ENSG00000053501	ENSG00000054654
								ENSG00000052841	ENSG00000054116	ENSG00000053524	ENSG00000054690
								ENSG00000053254	ENSG00000054118	ENSG00000053747	ENSG00000054793
								ENSG00000053328	ENSG00000054148	ENSG00000053770	ENSG00000054965
								ENSG00000053371	ENSG00000054267	ENSG00000053900	ENSG00000054967
								ENSG00000053372	ENSG00000054277	ENSG00000054116	ENSG00000054983
								ENSG00000053438	ENSG00000054282	ENSG00000054118	ENSG00000055044
								ENSG00000053501	ENSG00000054356	ENSG00000054148	ENSG00000055070
								ENSG00000053524	ENSG00000054392	ENSG00000054267	ENSG00000055118
								ENSG00000053747	ENSG00000054523	ENSG00000054277	ENSG00000055130
								ENSG00000053770	ENSG00000054611	ENSG00000054282	ENSG00000055147
								ENSG00000053900	ENSG00000054654	ENSG00000054356	ENSG00000055163
								ENSG00000054116	ENSG00000054690	ENSG00000054392	ENSG00000055208
								ENSG00000054118	ENSG00000054793	ENSG00000054523	ENSG00000055211
								ENSG00000054148	ENSG00000054965	ENSG00000054611	ENSG00000055332
								ENSG00000054267	ENSG00000054967	ENSG00000054654	ENSG00000055483
								ENSG00000054277	ENSG00000054983	ENSG00000054690	ENSG00000055609
								ENSG00000054282	ENSG00000055044	ENSG00000054793	ENSG00000055813
								ENSG00000054356	ENSG00000055070	ENSG00000054938	ENSG00000055917
								ENSG00000054392	ENSG00000055118	ENSG00000054965	ENSG00000055950
								ENSG00000054523	ENSG00000055130	ENSG00000054967	ENSG00000056050
								ENSG00000054598	ENSG00000055147	ENSG00000054983	ENSG00000056097
								ENSG00000054611	ENSG00000055163	ENSG00000055044	ENSG00000056277
								ENSG00000054654	ENSG00000055208	ENSG00000055070	ENSG00000056291
								ENSG00000054690	ENSG00000055211	ENSG00000055118	ENSG00000056487
								ENSG00000054793	ENSG00000055332	ENSG00000055130	ENSG00000056558
								ENSG00000054965	ENSG00000055483	ENSG00000055147	ENSG00000056586
								ENSG00000054967	ENSG00000055609	ENSG00000055163	ENSG00000056972
								ENSG00000054983	ENSG00000055917	ENSG00000055208	ENSG00000056998
								ENSG00000055044	ENSG00000055950	ENSG00000055211	ENSG00000057019
								ENSG00000055070	ENSG00000056050	ENSG00000055332	ENSG00000057252
								ENSG00000055118	ENSG00000056097	ENSG00000055483	ENSG00000057294
								ENSG00000055130	ENSG00000056277	ENSG00000055609	ENSG00000057468
								ENSG00000055147	ENSG00000056487	ENSG00000055813	ENSG00000057608
								ENSG00000055163	ENSG00000056558	ENSG00000055917	ENSG00000057663
								ENSG00000055208	ENSG00000056586	ENSG00000055950	ENSG00000057704
								ENSG00000055211	ENSG00000056736	ENSG00000056050	ENSG00000057757
								ENSG00000055332	ENSG00000056972	ENSG00000056097	ENSG00000057935
								ENSG00000055483	ENSG00000056998	ENSG00000056277	ENSG00000058056
								ENSG00000055609	ENSG00000057019	ENSG00000056291	ENSG00000058063
								ENSG00000055813	ENSG00000057252	ENSG00000056487	ENSG00000058091
								ENSG00000055917	ENSG00000057294	ENSG00000056586	ENSG00000058262
								ENSG00000055950	ENSG00000057468	ENSG00000056972	ENSG00000058272
								ENSG00000056050	ENSG00000057608	ENSG00000056998	ENSG00000058335
								ENSG00000056097	ENSG00000057657	ENSG00000057019	ENSG00000058404
								ENSG00000056277	ENSG00000057663	ENSG00000057252	ENSG00000058453
								ENSG00000056487	ENSG00000057704	ENSG00000057294	ENSG00000058600
								ENSG00000056558	ENSG00000057757	ENSG00000057468	ENSG00000058668
								ENSG00000056586	ENSG00000057935	ENSG00000057608	ENSG00000058729
								ENSG00000056736	ENSG00000058056	ENSG00000057663	ENSG00000058799
								ENSG00000056972	ENSG00000058063	ENSG00000057704	ENSG00000058804
								ENSG00000056998	ENSG00000058091	ENSG00000057757	ENSG00000059122
								ENSG00000057019	ENSG00000058262	ENSG00000057935	ENSG00000059145
								ENSG00000057252	ENSG00000058272	ENSG00000058056	ENSG00000059377
								ENSG00000057294	ENSG00000058404	ENSG00000058063	ENSG00000059573
								ENSG00000057468	ENSG00000058453	ENSG00000058091	ENSG00000059588
								ENSG00000057593	ENSG00000058600	ENSG00000058262	ENSG00000059691
								ENSG00000057608	ENSG00000058668	ENSG00000058272	ENSG00000059728
								ENSG00000057663	ENSG00000058729	ENSG00000058335	ENSG00000059758
								ENSG00000057704	ENSG00000058799	ENSG00000058404	ENSG00000059769
								ENSG00000057757	ENSG00000058804	ENSG00000058453	ENSG00000059804
								ENSG00000057935	ENSG00000059122	ENSG00000058600	ENSG00000059915
								ENSG00000058056	ENSG00000059145	ENSG00000058668	ENSG00000060069
								ENSG00000058063	ENSG00000059377	ENSG00000058729	ENSG00000060138
								ENSG00000058091	ENSG00000059378	ENSG00000058799	ENSG00000060237
								ENSG00000058262	ENSG00000059573	ENSG00000058804	ENSG00000060339
								ENSG00000058272	ENSG00000059588	ENSG00000059122	ENSG00000060491
								ENSG00000058404	ENSG00000059691	ENSG00000059145	ENSG00000060642
								ENSG00000058453	ENSG00000059728	ENSG00000059377	ENSG00000060656
								ENSG00000058600	ENSG00000059758	ENSG00000059573	ENSG00000060688
								ENSG00000058668	ENSG00000059769	ENSG00000059588	ENSG00000060709
								ENSG00000058729	ENSG00000059804	ENSG00000059691	ENSG00000060718
								ENSG00000058799	ENSG00000059915	ENSG00000059728	ENSG00000060749
								ENSG00000058804	ENSG00000060069	ENSG00000059758	ENSG00000060762
								ENSG00000059122	ENSG00000060138	ENSG00000059769	ENSG00000060971
								ENSG00000059145	ENSG00000060237	ENSG00000059804	ENSG00000060982
								ENSG00000059377	ENSG00000060339	ENSG00000059915	ENSG00000061273
								ENSG00000059378	ENSG00000060491	ENSG00000060069	ENSG00000061337
								ENSG00000059573	ENSG00000060642	ENSG00000060138	ENSG00000061656
								ENSG00000059588	ENSG00000060656	ENSG00000060237	ENSG00000061676
								ENSG00000059691	ENSG00000060688	ENSG00000060339	ENSG00000061794
								ENSG00000059728	ENSG00000060709	ENSG00000060491	ENSG00000061918
								ENSG00000059758	ENSG00000060718	ENSG00000060642	ENSG00000061936
								ENSG00000059769	ENSG00000060749	ENSG00000060656	ENSG00000061938
								ENSG00000059804	ENSG00000060762	ENSG00000060688	ENSG00000061987
								ENSG00000059915	ENSG00000060971	ENSG00000060709	ENSG00000062038
								ENSG00000060069	ENSG00000060982	ENSG00000060718	ENSG00000062194
								ENSG00000060138	ENSG00000061273	ENSG00000060749	ENSG00000062282
								ENSG00000060237	ENSG00000061337	ENSG00000060762	ENSG00000062370
								ENSG00000060339	ENSG00000061656	ENSG00000060971	ENSG00000062485
								ENSG00000060491	ENSG00000061676	ENSG00000060982	ENSG00000062598
								ENSG00000060642	ENSG00000061794	ENSG00000061273	ENSG00000062650
								ENSG00000060656	ENSG00000061918	ENSG00000061337	ENSG00000062716
								ENSG00000060688	ENSG00000061936	ENSG00000061492	ENSG00000062725
								ENSG00000060709	ENSG00000061938	ENSG00000061656	ENSG00000062822
								ENSG00000060718	ENSG00000061987	ENSG00000061676	ENSG00000063015
								ENSG00000060749	ENSG00000062038	ENSG00000061794	ENSG00000063046
								ENSG00000060762	ENSG00000062194	ENSG00000061918	ENSG00000063127
								ENSG00000060971	ENSG00000062282	ENSG00000061936	ENSG00000063169
								ENSG00000060982	ENSG00000062370	ENSG00000061938	ENSG00000063176
								ENSG00000061273	ENSG00000062485	ENSG00000061987	ENSG00000063177
								ENSG00000061337	ENSG00000062598	ENSG00000062038	ENSG00000063180
								ENSG00000061656	ENSG00000062650	ENSG00000062194	ENSG00000063241
								ENSG00000061676	ENSG00000062716	ENSG00000062282	ENSG00000063244
								ENSG00000061794	ENSG00000062725	ENSG00000062370	ENSG00000063245
								ENSG00000061918	ENSG00000062822	ENSG00000062485	ENSG00000063322
								ENSG00000061936	ENSG00000063015	ENSG00000062598	ENSG00000063438
								ENSG00000061938	ENSG00000063046	ENSG00000062650	ENSG00000063587
								ENSG00000061987	ENSG00000063127	ENSG00000062716	ENSG00000063601
								ENSG00000062038	ENSG00000063169	ENSG00000062725	ENSG00000063660
								ENSG00000062194	ENSG00000063176	ENSG00000062822	ENSG00000063761
								ENSG00000062282	ENSG00000063177	ENSG00000063015	ENSG00000063854
								ENSG00000062370	ENSG00000063180	ENSG00000063046	ENSG00000063978
								ENSG00000062485	ENSG00000063241	ENSG00000063169	ENSG00000064042
								ENSG00000062582	ENSG00000063244	ENSG00000063176	ENSG00000064102
								ENSG00000062598	ENSG00000063245	ENSG00000063177	ENSG00000064115
								ENSG00000062650	ENSG00000063322	ENSG00000063180	ENSG00000064199
								ENSG00000062716	ENSG00000063438	ENSG00000063241	ENSG00000064300
								ENSG00000062725	ENSG00000063587	ENSG00000063244	ENSG00000064309
								ENSG00000062822	ENSG00000063601	ENSG00000063245	ENSG00000064313
								ENSG00000063046	ENSG00000063660	ENSG00000063322	ENSG00000064393
								ENSG00000063127	ENSG00000063761	ENSG00000063438	ENSG00000064419
								ENSG00000063169	ENSG00000063854	ENSG00000063587	ENSG00000064490
								ENSG00000063176	ENSG00000063978	ENSG00000063601	ENSG00000064545
								ENSG00000063177	ENSG00000064042	ENSG00000063660	ENSG00000064547
								ENSG00000063180	ENSG00000064102	ENSG00000063761	ENSG00000064601
								ENSG00000063241	ENSG00000064115	ENSG00000063854	ENSG00000064607
								ENSG00000063244	ENSG00000064195	ENSG00000063978	ENSG00000064651
								ENSG00000063245	ENSG00000064199	ENSG00000064042	ENSG00000064652
								ENSG00000063322	ENSG00000064225	ENSG00000064102	ENSG00000064655
								ENSG00000063587	ENSG00000064300	ENSG00000064115	ENSG00000064666
								ENSG00000063601	ENSG00000064309	ENSG00000064199	ENSG00000064687
								ENSG00000063660	ENSG00000064313	ENSG00000064218	ENSG00000064692
								ENSG00000063761	ENSG00000064393	ENSG00000064300	ENSG00000064703
								ENSG00000063854	ENSG00000064419	ENSG00000064309	ENSG00000064726
								ENSG00000063978	ENSG00000064490	ENSG00000064313	ENSG00000064763
								ENSG00000064042	ENSG00000064545	ENSG00000064393	ENSG00000064932
								ENSG00000064102	ENSG00000064547	ENSG00000064419	ENSG00000064933
								ENSG00000064115	ENSG00000064601	ENSG00000064490	ENSG00000064961
								ENSG00000064195	ENSG00000064607	ENSG00000064545	ENSG00000064989
								ENSG00000064199	ENSG00000064651	ENSG00000064547	ENSG00000064995
								ENSG00000064218	ENSG00000064652	ENSG00000064601	ENSG00000064999
								ENSG00000064225	ENSG00000064655	ENSG00000064607	ENSG00000065000
								ENSG00000064300	ENSG00000064666	ENSG00000064651	ENSG00000065029
								ENSG00000064309	ENSG00000064687	ENSG00000064652	ENSG00000065054
								ENSG00000064313	ENSG00000064692	ENSG00000064655	ENSG00000065057
								ENSG00000064393	ENSG00000064703	ENSG00000064666	ENSG00000065060
								ENSG00000064419	ENSG00000064726	ENSG00000064687	ENSG00000065135
								ENSG00000064490	ENSG00000064763	ENSG00000064692	ENSG00000065150
								ENSG00000064545	ENSG00000064932	ENSG00000064703	ENSG00000065154
								ENSG00000064547	ENSG00000064933	ENSG00000064726	ENSG00000065183
								ENSG00000064601	ENSG00000064961	ENSG00000064763	ENSG00000065243
								ENSG00000064607	ENSG00000064989	ENSG00000064932	ENSG00000065268
								ENSG00000064651	ENSG00000064995	ENSG00000064933	ENSG00000065308
								ENSG00000064652	ENSG00000064999	ENSG00000064961	ENSG00000065320
								ENSG00000064655	ENSG00000065000	ENSG00000064989	ENSG00000065328
								ENSG00000064666	ENSG00000065029	ENSG00000064995	ENSG00000065357
								ENSG00000064687	ENSG00000065054	ENSG00000064999	ENSG00000065413
								ENSG00000064692	ENSG00000065057	ENSG00000065000	ENSG00000065427
								ENSG00000064703	ENSG00000065060	ENSG00000065029	ENSG00000065457
								ENSG00000064726	ENSG00000065135	ENSG00000065054	ENSG00000065485
								ENSG00000064763	ENSG00000065150	ENSG00000065057	ENSG00000065491
								ENSG00000064932	ENSG00000065154	ENSG00000065060	ENSG00000065518
								ENSG00000064933	ENSG00000065183	ENSG00000065135	ENSG00000065526
								ENSG00000064961	ENSG00000065243	ENSG00000065150	ENSG00000065534
								ENSG00000064989	ENSG00000065268	ENSG00000065154	ENSG00000065548
								ENSG00000064995	ENSG00000065308	ENSG00000065183	ENSG00000065559
								ENSG00000064999	ENSG00000065320	ENSG00000065243	ENSG00000065600
								ENSG00000065000	ENSG00000065328	ENSG00000065268	ENSG00000065609
								ENSG00000065029	ENSG00000065357	ENSG00000065308	ENSG00000065613
								ENSG00000065054	ENSG00000065361	ENSG00000065320	ENSG00000065615
								ENSG00000065057	ENSG00000065413	ENSG00000065328	ENSG00000065621
								ENSG00000065060	ENSG00000065427	ENSG00000065357	ENSG00000065665
								ENSG00000065135	ENSG00000065457	ENSG00000065413	ENSG00000065675
								ENSG00000065150	ENSG00000065485	ENSG00000065427	ENSG00000065717
								ENSG00000065154	ENSG00000065491	ENSG00000065457	ENSG00000065802
								ENSG00000065183	ENSG00000065518	ENSG00000065485	ENSG00000065809
								ENSG00000065243	ENSG00000065526	ENSG00000065491	ENSG00000065833
								ENSG00000065268	ENSG00000065534	ENSG00000065518	ENSG00000065882
								ENSG00000065308	ENSG00000065548	ENSG00000065526	ENSG00000065883
								ENSG00000065320	ENSG00000065559	ENSG00000065534	ENSG00000065911
								ENSG00000065328	ENSG00000065600	ENSG00000065548	ENSG00000065923
								ENSG00000065357	ENSG00000065609	ENSG00000065559	ENSG00000065970
								ENSG00000065361	ENSG00000065613	ENSG00000065600	ENSG00000065978
								ENSG00000065413	ENSG00000065615	ENSG00000065609	ENSG00000065989
								ENSG00000065427	ENSG00000065621	ENSG00000065613	ENSG00000066027
								ENSG00000065457	ENSG00000065665	ENSG00000065615	ENSG00000066032
								ENSG00000065485	ENSG00000065675	ENSG00000065621	ENSG00000066044
								ENSG00000065491	ENSG00000065717	ENSG00000065665	ENSG00000066084
								ENSG00000065518	ENSG00000065802	ENSG00000065675	ENSG00000066117
								ENSG00000065526	ENSG00000065809	ENSG00000065717	ENSG00000066135
								ENSG00000065534	ENSG00000065833	ENSG00000065802	ENSG00000066136
								ENSG00000065548	ENSG00000065882	ENSG00000065809	ENSG00000066185
								ENSG00000065559	ENSG00000065883	ENSG00000065833	ENSG00000066248
								ENSG00000065600	ENSG00000065911	ENSG00000065882	ENSG00000066279
								ENSG00000065609	ENSG00000065923	ENSG00000065883	ENSG00000066322
								ENSG00000065613	ENSG00000065970	ENSG00000065911	ENSG00000066379
								ENSG00000065615	ENSG00000065978	ENSG00000065923	ENSG00000066382
								ENSG00000065621	ENSG00000065989	ENSG00000065970	ENSG00000066422
								ENSG00000065665	ENSG00000066027	ENSG00000065978	ENSG00000066427
								ENSG00000065675	ENSG00000066032	ENSG00000065989	ENSG00000066455
								ENSG00000065802	ENSG00000066044	ENSG00000066027	ENSG00000066468
								ENSG00000065809	ENSG00000066084	ENSG00000066032	ENSG00000066557
								ENSG00000065833	ENSG00000066117	ENSG00000066044	ENSG00000066583
								ENSG00000065882	ENSG00000066135	ENSG00000066084	ENSG00000066629
								ENSG00000065883	ENSG00000066136	ENSG00000066117	ENSG00000066651
								ENSG00000065911	ENSG00000066185	ENSG00000066135	ENSG00000066654
								ENSG00000065923	ENSG00000066248	ENSG00000066136	ENSG00000066697
								ENSG00000065970	ENSG00000066279	ENSG00000066185	ENSG00000066735
								ENSG00000065978	ENSG00000066322	ENSG00000066248	ENSG00000066739
								ENSG00000065989	ENSG00000066379	ENSG00000066279	ENSG00000066777
								ENSG00000066027	ENSG00000066382	ENSG00000066322	ENSG00000066827
								ENSG00000066032	ENSG00000066422	ENSG00000066379	ENSG00000066855
								ENSG00000066044	ENSG00000066427	ENSG00000066382	ENSG00000066926
								ENSG00000066056	ENSG00000066455	ENSG00000066422	ENSG00000066933
								ENSG00000066084	ENSG00000066468	ENSG00000066427	ENSG00000067048
								ENSG00000066117	ENSG00000066557	ENSG00000066455	ENSG00000067057
								ENSG00000066135	ENSG00000066583	ENSG00000066468	ENSG00000067064
								ENSG00000066136	ENSG00000066629	ENSG00000066557	ENSG00000067082
								ENSG00000066185	ENSG00000066651	ENSG00000066583	ENSG00000067113
								ENSG00000066279	ENSG00000066654	ENSG00000066629	ENSG00000067141
								ENSG00000066322	ENSG00000066697	ENSG00000066651	ENSG00000067167
								ENSG00000066379	ENSG00000066735	ENSG00000066654	ENSG00000067177
								ENSG00000066382	ENSG00000066739	ENSG00000066697	ENSG00000067182
								ENSG00000066422	ENSG00000066777	ENSG00000066735	ENSG00000067191
								ENSG00000066427	ENSG00000066827	ENSG00000066739	ENSG00000067208
								ENSG00000066455	ENSG00000066855	ENSG00000066777	ENSG00000067221
								ENSG00000066468	ENSG00000066926	ENSG00000066827	ENSG00000067225
								ENSG00000066557	ENSG00000066933	ENSG00000066855	ENSG00000067248
								ENSG00000066583	ENSG00000067048	ENSG00000066926	ENSG00000067334
								ENSG00000066629	ENSG00000067057	ENSG00000066933	ENSG00000067365
								ENSG00000066651	ENSG00000067064	ENSG00000067048	ENSG00000067369
								ENSG00000066654	ENSG00000067082	ENSG00000067057	ENSG00000067445
								ENSG00000066697	ENSG00000067113	ENSG00000067064	ENSG00000067533
								ENSG00000066735	ENSG00000067141	ENSG00000067082	ENSG00000067560
								ENSG00000066739	ENSG00000067167	ENSG00000067113	ENSG00000067596
								ENSG00000066777	ENSG00000067177	ENSG00000067141	ENSG00000067601
								ENSG00000066827	ENSG00000067182	ENSG00000067167	ENSG00000067606
								ENSG00000066855	ENSG00000067191	ENSG00000067177	ENSG00000067646
								ENSG00000066926	ENSG00000067208	ENSG00000067182	ENSG00000067704
								ENSG00000066933	ENSG00000067221	ENSG00000067191	ENSG00000067715
								ENSG00000067048	ENSG00000067225	ENSG00000067208	ENSG00000067798
								ENSG00000067057	ENSG00000067248	ENSG00000067221	ENSG00000067829
								ENSG00000067064	ENSG00000067334	ENSG00000067225	ENSG00000067836
								ENSG00000067082	ENSG00000067365	ENSG00000067248	ENSG00000067840
								ENSG00000067113	ENSG00000067369	ENSG00000067334	ENSG00000067842
								ENSG00000067141	ENSG00000067445	ENSG00000067365	ENSG00000067900
								ENSG00000067167	ENSG00000067533	ENSG00000067369	ENSG00000067955
								ENSG00000067177	ENSG00000067560	ENSG00000067445	ENSG00000067992
								ENSG00000067182	ENSG00000067596	ENSG00000067533	ENSG00000068001
								ENSG00000067191	ENSG00000067601	ENSG00000067560	ENSG00000068024
								ENSG00000067208	ENSG00000067606	ENSG00000067596	ENSG00000068028
								ENSG00000067221	ENSG00000067646	ENSG00000067601	ENSG00000068078
								ENSG00000067225	ENSG00000067704	ENSG00000067606	ENSG00000068097
								ENSG00000067248	ENSG00000067715	ENSG00000067646	ENSG00000068120
								ENSG00000067334	ENSG00000067798	ENSG00000067704	ENSG00000068137
								ENSG00000067365	ENSG00000067829	ENSG00000067715	ENSG00000068305
								ENSG00000067369	ENSG00000067836	ENSG00000067798	ENSG00000068308
								ENSG00000067445	ENSG00000067840	ENSG00000067829	ENSG00000068323
								ENSG00000067533	ENSG00000067900	ENSG00000067836	ENSG00000068354
								ENSG00000067560	ENSG00000067955	ENSG00000067840	ENSG00000068366
								ENSG00000067596	ENSG00000067992	ENSG00000067842	ENSG00000068383
								ENSG00000067601	ENSG00000068001	ENSG00000067900	ENSG00000068394
								ENSG00000067606	ENSG00000068024	ENSG00000067955	ENSG00000068400
								ENSG00000067646	ENSG00000068028	ENSG00000067992	ENSG00000068438
								ENSG00000067704	ENSG00000068078	ENSG00000068001	ENSG00000068489
								ENSG00000067715	ENSG00000068079	ENSG00000068024	ENSG00000068615
								ENSG00000067798	ENSG00000068097	ENSG00000068028	ENSG00000068650
								ENSG00000067829	ENSG00000068120	ENSG00000068097	ENSG00000068654
								ENSG00000067836	ENSG00000068137	ENSG00000068120	ENSG00000068697
								ENSG00000067840	ENSG00000068305	ENSG00000068137	ENSG00000068724
								ENSG00000067900	ENSG00000068308	ENSG00000068305	ENSG00000068745
								ENSG00000067955	ENSG00000068323	ENSG00000068308	ENSG00000068784
								ENSG00000067992	ENSG00000068354	ENSG00000068323	ENSG00000068796
								ENSG00000068001	ENSG00000068366	ENSG00000068354	ENSG00000068831
								ENSG00000068024	ENSG00000068383	ENSG00000068366	ENSG00000068878
								ENSG00000068028	ENSG00000068394	ENSG00000068383	ENSG00000068885
								ENSG00000068078	ENSG00000068400	ENSG00000068394	ENSG00000068903
								ENSG00000068079	ENSG00000068438	ENSG00000068400	ENSG00000068912
								ENSG00000068097	ENSG00000068489	ENSG00000068438	ENSG00000068971
								ENSG00000068120	ENSG00000068615	ENSG00000068489	ENSG00000068976
								ENSG00000068137	ENSG00000068650	ENSG00000068615	ENSG00000069020
								ENSG00000068305	ENSG00000068654	ENSG00000068650	ENSG00000069188
								ENSG00000068308	ENSG00000068697	ENSG00000068654	ENSG00000069248
								ENSG00000068323	ENSG00000068724	ENSG00000068697	ENSG00000069275
								ENSG00000068354	ENSG00000068745	ENSG00000068724	ENSG00000069329
								ENSG00000068366	ENSG00000068784	ENSG00000068745	ENSG00000069345
								ENSG00000068383	ENSG00000068796	ENSG00000068784	ENSG00000069399
								ENSG00000068394	ENSG00000068831	ENSG00000068796	ENSG00000069424
								ENSG00000068400	ENSG00000068878	ENSG00000068831	ENSG00000069482
								ENSG00000068438	ENSG00000068885	ENSG00000068878	ENSG00000069493
								ENSG00000068489	ENSG00000068903	ENSG00000068885	ENSG00000069509
								ENSG00000068615	ENSG00000068912	ENSG00000068903	ENSG00000069535
								ENSG00000068650	ENSG00000068971	ENSG00000068912	ENSG00000069667
								ENSG00000068654	ENSG00000068976	ENSG00000068971	ENSG00000069702
								ENSG00000068697	ENSG00000069011	ENSG00000068976	ENSG00000069849
								ENSG00000068724	ENSG00000069020	ENSG00000069018	ENSG00000069869
								ENSG00000068745	ENSG00000069188	ENSG00000069020	ENSG00000069943
								ENSG00000068784	ENSG00000069248	ENSG00000069188	ENSG00000069956
								ENSG00000068796	ENSG00000069275	ENSG00000069248	ENSG00000069966
								ENSG00000068878	ENSG00000069329	ENSG00000069275	ENSG00000069974
								ENSG00000068885	ENSG00000069345	ENSG00000069329	ENSG00000069998
								ENSG00000068903	ENSG00000069399	ENSG00000069345	ENSG00000070010
								ENSG00000068912	ENSG00000069424	ENSG00000069399	ENSG00000070018
								ENSG00000068971	ENSG00000069493	ENSG00000069424	ENSG00000070047
								ENSG00000068976	ENSG00000069509	ENSG00000069482	ENSG00000070061
								ENSG00000069020	ENSG00000069667	ENSG00000069493	ENSG00000070081
								ENSG00000069188	ENSG00000069696	ENSG00000069509	ENSG00000070087
								ENSG00000069248	ENSG00000069702	ENSG00000069535	ENSG00000070182
								ENSG00000069275	ENSG00000069849	ENSG00000069667	ENSG00000070214
								ENSG00000069329	ENSG00000069869	ENSG00000069702	ENSG00000070269
								ENSG00000069345	ENSG00000069943	ENSG00000069849	ENSG00000070366
								ENSG00000069399	ENSG00000069956	ENSG00000069869	ENSG00000070367
								ENSG00000069424	ENSG00000069966	ENSG00000069943	ENSG00000070371
								ENSG00000069493	ENSG00000069974	ENSG00000069956	ENSG00000070388
								ENSG00000069509	ENSG00000069998	ENSG00000069966	ENSG00000070404
								ENSG00000069535	ENSG00000070010	ENSG00000069974	ENSG00000070413
								ENSG00000069667	ENSG00000070018	ENSG00000069998	ENSG00000070423
								ENSG00000069696	ENSG00000070047	ENSG00000070010	ENSG00000070444
								ENSG00000069702	ENSG00000070061	ENSG00000070018	ENSG00000070476
								ENSG00000069849	ENSG00000070081	ENSG00000070019	ENSG00000070495
								ENSG00000069869	ENSG00000070087	ENSG00000070047	ENSG00000070501
								ENSG00000069943	ENSG00000070159	ENSG00000070061	ENSG00000070540
								ENSG00000069956	ENSG00000070193	ENSG00000070081	ENSG00000070610
								ENSG00000069966	ENSG00000070214	ENSG00000070087	ENSG00000070614
								ENSG00000069974	ENSG00000070269	ENSG00000070159	ENSG00000070669
								ENSG00000069998	ENSG00000070366	ENSG00000070182	ENSG00000070718
								ENSG00000070010	ENSG00000070367	ENSG00000070193	ENSG00000070729
								ENSG00000070018	ENSG00000070371	ENSG00000070214	ENSG00000070756
								ENSG00000070047	ENSG00000070404	ENSG00000070269	ENSG00000070759
								ENSG00000070061	ENSG00000070413	ENSG00000070366	ENSG00000070761
								ENSG00000070081	ENSG00000070423	ENSG00000070367	ENSG00000070770
								ENSG00000070087	ENSG00000070444	ENSG00000070371	ENSG00000070778
								ENSG00000070159	ENSG00000070476	ENSG00000070388	ENSG00000070785
								ENSG00000070214	ENSG00000070495	ENSG00000070404	ENSG00000070808
								ENSG00000070269	ENSG00000070501	ENSG00000070413	ENSG00000070814
								ENSG00000070366	ENSG00000070540	ENSG00000070423	ENSG00000070831
								ENSG00000070367	ENSG00000070610	ENSG00000070444	ENSG00000070882
								ENSG00000070371	ENSG00000070614	ENSG00000070476	ENSG00000070886
								ENSG00000070388	ENSG00000070669	ENSG00000070495	ENSG00000070950
								ENSG00000070404	ENSG00000070718	ENSG00000070501	ENSG00000070961
								ENSG00000070413	ENSG00000070729	ENSG00000070540	ENSG00000071051
								ENSG00000070423	ENSG00000070756	ENSG00000070601	ENSG00000071054
								ENSG00000070444	ENSG00000070759	ENSG00000070610	ENSG00000071073
								ENSG00000070476	ENSG00000070761	ENSG00000070614	ENSG00000071082
								ENSG00000070495	ENSG00000070770	ENSG00000070669	ENSG00000071127
								ENSG00000070501	ENSG00000070778	ENSG00000070718	ENSG00000071189
								ENSG00000070540	ENSG00000070785	ENSG00000070729	ENSG00000071205
								ENSG00000070601	ENSG00000070808	ENSG00000070756	ENSG00000071242
								ENSG00000070610	ENSG00000070814	ENSG00000070761	ENSG00000071243
								ENSG00000070614	ENSG00000070831	ENSG00000070770	ENSG00000071246
								ENSG00000070669	ENSG00000070882	ENSG00000070778	ENSG00000071282
								ENSG00000070718	ENSG00000070950	ENSG00000070785	ENSG00000071462
								ENSG00000070729	ENSG00000070961	ENSG00000070808	ENSG00000071537
								ENSG00000070756	ENSG00000071051	ENSG00000070814	ENSG00000071539
								ENSG00000070759	ENSG00000071054	ENSG00000070831	ENSG00000071553
								ENSG00000070761	ENSG00000071073	ENSG00000070882	ENSG00000071564
								ENSG00000070770	ENSG00000071082	ENSG00000070886	ENSG00000071575
								ENSG00000070778	ENSG00000071127	ENSG00000070950	ENSG00000071626
								ENSG00000070785	ENSG00000071189	ENSG00000070961	ENSG00000071655
								ENSG00000070808	ENSG00000071205	ENSG00000071051	ENSG00000071794
								ENSG00000070814	ENSG00000071242	ENSG00000071054	ENSG00000071859
								ENSG00000070831	ENSG00000071243	ENSG00000071073	ENSG00000071889
								ENSG00000070882	ENSG00000071246	ENSG00000071082	ENSG00000071894
								ENSG00000070950	ENSG00000071282	ENSG00000071127	ENSG00000071909
								ENSG00000070961	ENSG00000071462	ENSG00000071189	ENSG00000071994
								ENSG00000071051	ENSG00000071537	ENSG00000071205	ENSG00000072041
								ENSG00000071054	ENSG00000071539	ENSG00000071242	ENSG00000072042
								ENSG00000071073	ENSG00000071553	ENSG00000071243	ENSG00000072062
								ENSG00000071082	ENSG00000071564	ENSG00000071246	ENSG00000072071
								ENSG00000071127	ENSG00000071575	ENSG00000071462	ENSG00000072110
								ENSG00000071189	ENSG00000071626	ENSG00000071537	ENSG00000072121
								ENSG00000071205	ENSG00000071655	ENSG00000071539	ENSG00000072133
								ENSG00000071242	ENSG00000071794	ENSG00000071553	ENSG00000072134
								ENSG00000071243	ENSG00000071859	ENSG00000071564	ENSG00000072135
								ENSG00000071246	ENSG00000071889	ENSG00000071575	ENSG00000072182
								ENSG00000071282	ENSG00000071894	ENSG00000071626	ENSG00000072195
								ENSG00000071462	ENSG00000071909	ENSG00000071655	ENSG00000072210
								ENSG00000071537	ENSG00000071967	ENSG00000071794	ENSG00000072274
								ENSG00000071539	ENSG00000071994	ENSG00000071859	ENSG00000072310
								ENSG00000071553	ENSG00000072041	ENSG00000071889	ENSG00000072364
								ENSG00000071564	ENSG00000072042	ENSG00000071894	ENSG00000072401
								ENSG00000071575	ENSG00000072062	ENSG00000071909	ENSG00000072415
								ENSG00000071626	ENSG00000072071	ENSG00000071994	ENSG00000072422
								ENSG00000071655	ENSG00000072110	ENSG00000072041	ENSG00000072501
								ENSG00000071794	ENSG00000072121	ENSG00000072042	ENSG00000072506
								ENSG00000071859	ENSG00000072133	ENSG00000072062	ENSG00000072518
								ENSG00000071889	ENSG00000072134	ENSG00000072071	ENSG00000072571
								ENSG00000071894	ENSG00000072135	ENSG00000072110	ENSG00000072609
								ENSG00000071967	ENSG00000072182	ENSG00000072121	ENSG00000072657
								ENSG00000071994	ENSG00000072195	ENSG00000072133	ENSG00000072682
								ENSG00000072041	ENSG00000072210	ENSG00000072134	ENSG00000072736
								ENSG00000072042	ENSG00000072274	ENSG00000072135	ENSG00000072756
								ENSG00000072062	ENSG00000072310	ENSG00000072182	ENSG00000072778
								ENSG00000072071	ENSG00000072364	ENSG00000072195	ENSG00000072786
								ENSG00000072110	ENSG00000072401	ENSG00000072201	ENSG00000072803
								ENSG00000072121	ENSG00000072415	ENSG00000072210	ENSG00000072818
								ENSG00000072133	ENSG00000072422	ENSG00000072274	ENSG00000072832
								ENSG00000072134	ENSG00000072501	ENSG00000072310	ENSG00000072840
								ENSG00000072135	ENSG00000072506	ENSG00000072315	ENSG00000072849
								ENSG00000072163	ENSG00000072518	ENSG00000072364	ENSG00000072864
								ENSG00000072182	ENSG00000072571	ENSG00000072401	ENSG00000072952
								ENSG00000072195	ENSG00000072609	ENSG00000072415	ENSG00000072954
								ENSG00000072201	ENSG00000072657	ENSG00000072422	ENSG00000072958
								ENSG00000072210	ENSG00000072682	ENSG00000072501	ENSG00000073008
								ENSG00000072274	ENSG00000072736	ENSG00000072506	ENSG00000073050
								ENSG00000072310	ENSG00000072756	ENSG00000072518	ENSG00000073060
								ENSG00000072364	ENSG00000072778	ENSG00000072571	ENSG00000073111
								ENSG00000072401	ENSG00000072786	ENSG00000072609	ENSG00000073150
								ENSG00000072415	ENSG00000072803	ENSG00000072657	ENSG00000073169
								ENSG00000072422	ENSG00000072818	ENSG00000072682	ENSG00000073417
								ENSG00000072501	ENSG00000072832	ENSG00000072736	ENSG00000073464
								ENSG00000072506	ENSG00000072840	ENSG00000072756	ENSG00000073536
								ENSG00000072518	ENSG00000072849	ENSG00000072778	ENSG00000073578
								ENSG00000072571	ENSG00000072864	ENSG00000072786	ENSG00000073584
								ENSG00000072609	ENSG00000072952	ENSG00000072803	ENSG00000073605
								ENSG00000072657	ENSG00000072954	ENSG00000072818	ENSG00000073614
								ENSG00000072682	ENSG00000072958	ENSG00000072832	ENSG00000073670
								ENSG00000072736	ENSG00000073008	ENSG00000072840	ENSG00000073711
								ENSG00000072756	ENSG00000073050	ENSG00000072849	ENSG00000073712
								ENSG00000072778	ENSG00000073060	ENSG00000072858	ENSG00000073792
								ENSG00000072786	ENSG00000073111	ENSG00000072864	ENSG00000073803
								ENSG00000072803	ENSG00000073150	ENSG00000072952	ENSG00000073849
								ENSG00000072818	ENSG00000073169	ENSG00000072954	ENSG00000073910
								ENSG00000072832	ENSG00000073350	ENSG00000072958	ENSG00000073921
								ENSG00000072840	ENSG00000073417	ENSG00000073008	ENSG00000073969
								ENSG00000072849	ENSG00000073464	ENSG00000073050	ENSG00000074047
								ENSG00000072864	ENSG00000073536	ENSG00000073060	ENSG00000074054
								ENSG00000072952	ENSG00000073578	ENSG00000073111	ENSG00000074071
								ENSG00000072954	ENSG00000073584	ENSG00000073150	ENSG00000074181
								ENSG00000072958	ENSG00000073605	ENSG00000073169	ENSG00000074201
								ENSG00000073008	ENSG00000073614	ENSG00000073417	ENSG00000074211
								ENSG00000073050	ENSG00000073670	ENSG00000073464	ENSG00000074219
								ENSG00000073060	ENSG00000073711	ENSG00000073536	ENSG00000074266
								ENSG00000073111	ENSG00000073712	ENSG00000073578	ENSG00000074276
								ENSG00000073150	ENSG00000073792	ENSG00000073584	ENSG00000074317
								ENSG00000073169	ENSG00000073803	ENSG00000073605	ENSG00000074319
								ENSG00000073331	ENSG00000073849	ENSG00000073614	ENSG00000074356
								ENSG00000073350	ENSG00000073905	ENSG00000073670	ENSG00000074416
								ENSG00000073417	ENSG00000073910	ENSG00000073711	ENSG00000074527
								ENSG00000073464	ENSG00000073921	ENSG00000073712	ENSG00000074582
								ENSG00000073536	ENSG00000073969	ENSG00000073734	ENSG00000074590
								ENSG00000073578	ENSG00000074047	ENSG00000073792	ENSG00000074603
								ENSG00000073584	ENSG00000074054	ENSG00000073803	ENSG00000074621
								ENSG00000073605	ENSG00000074071	ENSG00000073849	ENSG00000074657
								ENSG00000073614	ENSG00000074181	ENSG00000073905	ENSG00000074660
								ENSG00000073670	ENSG00000074201	ENSG00000073910	ENSG00000074695
								ENSG00000073711	ENSG00000074211	ENSG00000073921	ENSG00000074696
								ENSG00000073712	ENSG00000074219	ENSG00000073969	ENSG00000074706
								ENSG00000073792	ENSG00000074266	ENSG00000074047	ENSG00000074755
								ENSG00000073803	ENSG00000074317	ENSG00000074054	ENSG00000074800
								ENSG00000073849	ENSG00000074319	ENSG00000074071	ENSG00000074803
								ENSG00000073905	ENSG00000074356	ENSG00000074181	ENSG00000074842
								ENSG00000073910	ENSG00000074410	ENSG00000074201	ENSG00000074855
								ENSG00000073921	ENSG00000074416	ENSG00000074211	ENSG00000074935
								ENSG00000073969	ENSG00000074527	ENSG00000074219	ENSG00000074964
								ENSG00000074047	ENSG00000074582	ENSG00000074266	ENSG00000075035
								ENSG00000074054	ENSG00000074590	ENSG00000074276	ENSG00000075043
								ENSG00000074071	ENSG00000074603	ENSG00000074317	ENSG00000075089
								ENSG00000074181	ENSG00000074621	ENSG00000074319	ENSG00000075131
								ENSG00000074201	ENSG00000074657	ENSG00000074356	ENSG00000075142
								ENSG00000074211	ENSG00000074660	ENSG00000074410	ENSG00000075151
								ENSG00000074219	ENSG00000074695	ENSG00000074416	ENSG00000075188
								ENSG00000074266	ENSG00000074696	ENSG00000074527	ENSG00000075213
								ENSG00000074317	ENSG00000074706	ENSG00000074582	ENSG00000075218
								ENSG00000074319	ENSG00000074755	ENSG00000074590	ENSG00000075223
								ENSG00000074356	ENSG00000074800	ENSG00000074603	ENSG00000075234
								ENSG00000074410	ENSG00000074803	ENSG00000074621	ENSG00000075239
								ENSG00000074416	ENSG00000074842	ENSG00000074657	ENSG00000075240
								ENSG00000074527	ENSG00000074855	ENSG00000074660	ENSG00000075275
								ENSG00000074582	ENSG00000074935	ENSG00000074695	ENSG00000075290
								ENSG00000074590	ENSG00000074964	ENSG00000074696	ENSG00000075292
								ENSG00000074603	ENSG00000075035	ENSG00000074706	ENSG00000075303
								ENSG00000074621	ENSG00000075043	ENSG00000074755	ENSG00000075336
								ENSG00000074657	ENSG00000075089	ENSG00000074800	ENSG00000075340
								ENSG00000074660	ENSG00000075131	ENSG00000074803	ENSG00000075388
								ENSG00000074695	ENSG00000075142	ENSG00000074842	ENSG00000075391
								ENSG00000074696	ENSG00000075151	ENSG00000074855	ENSG00000075399
								ENSG00000074706	ENSG00000075188	ENSG00000074935	ENSG00000075407
								ENSG00000074755	ENSG00000075213	ENSG00000074964	ENSG00000075413
								ENSG00000074800	ENSG00000075218	ENSG00000075035	ENSG00000075415
								ENSG00000074842	ENSG00000075223	ENSG00000075043	ENSG00000075420
								ENSG00000074855	ENSG00000075234	ENSG00000075089	ENSG00000075426
								ENSG00000074935	ENSG00000075239	ENSG00000075131	ENSG00000075461
								ENSG00000074964	ENSG00000075240	ENSG00000075142	ENSG00000075539
								ENSG00000075035	ENSG00000075275	ENSG00000075151	ENSG00000075568
								ENSG00000075043	ENSG00000075290	ENSG00000075188	ENSG00000075618
								ENSG00000075089	ENSG00000075292	ENSG00000075213	ENSG00000075624
								ENSG00000075131	ENSG00000075303	ENSG00000075218	ENSG00000075702
								ENSG00000075142	ENSG00000075336	ENSG00000075223	ENSG00000075711
								ENSG00000075151	ENSG00000075340	ENSG00000075234	ENSG00000075785
								ENSG00000075188	ENSG00000075391	ENSG00000075239	ENSG00000075790
								ENSG00000075213	ENSG00000075399	ENSG00000075240	ENSG00000075826
								ENSG00000075218	ENSG00000075407	ENSG00000075275	ENSG00000075856
								ENSG00000075223	ENSG00000075413	ENSG00000075290	ENSG00000075914
								ENSG00000075234	ENSG00000075415	ENSG00000075292	ENSG00000075945
								ENSG00000075239	ENSG00000075420	ENSG00000075303	ENSG00000075975
								ENSG00000075240	ENSG00000075426	ENSG00000075336	ENSG00000076003
								ENSG00000075275	ENSG00000075461	ENSG00000075340	ENSG00000076043
								ENSG00000075290	ENSG00000075539	ENSG00000075391	ENSG00000076053
								ENSG00000075292	ENSG00000075568	ENSG00000075399	ENSG00000076067
								ENSG00000075303	ENSG00000075618	ENSG00000075407	ENSG00000076108
								ENSG00000075336	ENSG00000075624	ENSG00000075413	ENSG00000076201
								ENSG00000075340	ENSG00000075643	ENSG00000075415	ENSG00000076242
								ENSG00000075391	ENSG00000075702	ENSG00000075420	ENSG00000076248
								ENSG00000075399	ENSG00000075711	ENSG00000075426	ENSG00000076321
								ENSG00000075407	ENSG00000075785	ENSG00000075429	ENSG00000076344
								ENSG00000075413	ENSG00000075790	ENSG00000075461	ENSG00000076351
								ENSG00000075415	ENSG00000075826	ENSG00000075539	ENSG00000076356
								ENSG00000075420	ENSG00000075856	ENSG00000075568	ENSG00000076382
								ENSG00000075426	ENSG00000075884	ENSG00000075618	ENSG00000076513
								ENSG00000075461	ENSG00000075914	ENSG00000075624	ENSG00000076554
								ENSG00000075539	ENSG00000075945	ENSG00000075702	ENSG00000076555
								ENSG00000075568	ENSG00000075975	ENSG00000075711	ENSG00000076604
								ENSG00000075618	ENSG00000076003	ENSG00000075785	ENSG00000076641
								ENSG00000075624	ENSG00000076043	ENSG00000075790	ENSG00000076650
								ENSG00000075643	ENSG00000076053	ENSG00000075826	ENSG00000076685
								ENSG00000075651	ENSG00000076067	ENSG00000075856	ENSG00000076706
								ENSG00000075702	ENSG00000076108	ENSG00000075914	ENSG00000076716
								ENSG00000075711	ENSG00000076201	ENSG00000075945	ENSG00000076826
								ENSG00000075785	ENSG00000076242	ENSG00000075975	ENSG00000076864
								ENSG00000075790	ENSG00000076248	ENSG00000076003	ENSG00000076924
								ENSG00000075826	ENSG00000076258	ENSG00000076043	ENSG00000076928
								ENSG00000075856	ENSG00000076321	ENSG00000076053	ENSG00000076944
								ENSG00000075884	ENSG00000076344	ENSG00000076067	ENSG00000076984
								ENSG00000075914	ENSG00000076351	ENSG00000076108	ENSG00000077044
								ENSG00000075945	ENSG00000076356	ENSG00000076201	ENSG00000077063
								ENSG00000075975	ENSG00000076382	ENSG00000076242	ENSG00000077080
								ENSG00000076003	ENSG00000076513	ENSG00000076248	ENSG00000077092
								ENSG00000076043	ENSG00000076554	ENSG00000076321	ENSG00000077097
								ENSG00000076053	ENSG00000076555	ENSG00000076344	ENSG00000077147
								ENSG00000076067	ENSG00000076604	ENSG00000076351	ENSG00000077150
								ENSG00000076108	ENSG00000076641	ENSG00000076356	ENSG00000077152
								ENSG00000076201	ENSG00000076650	ENSG00000076382	ENSG00000077157
								ENSG00000076242	ENSG00000076662	ENSG00000076513	ENSG00000077232
								ENSG00000076248	ENSG00000076685	ENSG00000076554	ENSG00000077235
								ENSG00000076258	ENSG00000076706	ENSG00000076555	ENSG00000077254
								ENSG00000076321	ENSG00000076716	ENSG00000076604	ENSG00000077264
								ENSG00000076344	ENSG00000076770	ENSG00000076641	ENSG00000077274
								ENSG00000076351	ENSG00000076826	ENSG00000076650	ENSG00000077279
								ENSG00000076356	ENSG00000076864	ENSG00000076685	ENSG00000077312
								ENSG00000076382	ENSG00000076924	ENSG00000076706	ENSG00000077327
								ENSG00000076513	ENSG00000076928	ENSG00000076716	ENSG00000077348
								ENSG00000076554	ENSG00000076944	ENSG00000076826	ENSG00000077380
								ENSG00000076555	ENSG00000076984	ENSG00000076864	ENSG00000077454
								ENSG00000076604	ENSG00000077044	ENSG00000076924	ENSG00000077458
								ENSG00000076641	ENSG00000077063	ENSG00000076928	ENSG00000077463
								ENSG00000076650	ENSG00000077080	ENSG00000076944	ENSG00000077514
								ENSG00000076662	ENSG00000077092	ENSG00000076984	ENSG00000077522
								ENSG00000076685	ENSG00000077097	ENSG00000077044	ENSG00000077549
								ENSG00000076706	ENSG00000077147	ENSG00000077063	ENSG00000077585
								ENSG00000076716	ENSG00000077150	ENSG00000077080	ENSG00000077616
								ENSG00000076770	ENSG00000077152	ENSG00000077092	ENSG00000077684
								ENSG00000076826	ENSG00000077157	ENSG00000077097	ENSG00000077721
								ENSG00000076864	ENSG00000077232	ENSG00000077147	ENSG00000077782
								ENSG00000076924	ENSG00000077235	ENSG00000077150	ENSG00000077942
								ENSG00000076928	ENSG00000077238	ENSG00000077152	ENSG00000078018
								ENSG00000076944	ENSG00000077254	ENSG00000077157	ENSG00000078043
								ENSG00000076984	ENSG00000077264	ENSG00000077232	ENSG00000078053
								ENSG00000077009	ENSG00000077274	ENSG00000077235	ENSG00000078061
								ENSG00000077044	ENSG00000077279	ENSG00000077238	ENSG00000078070
								ENSG00000077063	ENSG00000077312	ENSG00000077254	ENSG00000078081
								ENSG00000077080	ENSG00000077327	ENSG00000077264	ENSG00000078114
								ENSG00000077092	ENSG00000077348	ENSG00000077274	ENSG00000078124
								ENSG00000077097	ENSG00000077380	ENSG00000077279	ENSG00000078140
								ENSG00000077147	ENSG00000077454	ENSG00000077312	ENSG00000078142
								ENSG00000077150	ENSG00000077458	ENSG00000077327	ENSG00000078177
								ENSG00000077152	ENSG00000077463	ENSG00000077348	ENSG00000078237
								ENSG00000077157	ENSG00000077514	ENSG00000077380	ENSG00000078246
								ENSG00000077232	ENSG00000077522	ENSG00000077454	ENSG00000078269
								ENSG00000077235	ENSG00000077549	ENSG00000077458	ENSG00000078295
								ENSG00000077238	ENSG00000077585	ENSG00000077463	ENSG00000078304
								ENSG00000077254	ENSG00000077616	ENSG00000077514	ENSG00000078319
								ENSG00000077264	ENSG00000077684	ENSG00000077522	ENSG00000078328
								ENSG00000077274	ENSG00000077713	ENSG00000077549	ENSG00000078369
								ENSG00000077279	ENSG00000077721	ENSG00000077585	ENSG00000078401
								ENSG00000077312	ENSG00000077782	ENSG00000077616	ENSG00000078403
								ENSG00000077327	ENSG00000077942	ENSG00000077684	ENSG00000078487
								ENSG00000077348	ENSG00000078018	ENSG00000077713	ENSG00000078549
								ENSG00000077380	ENSG00000078043	ENSG00000077721	ENSG00000078618
								ENSG00000077454	ENSG00000078053	ENSG00000077782	ENSG00000078668
								ENSG00000077458	ENSG00000078061	ENSG00000077935	ENSG00000078674
								ENSG00000077463	ENSG00000078070	ENSG00000077942	ENSG00000078687
								ENSG00000077514	ENSG00000078114	ENSG00000077943	ENSG00000078699
								ENSG00000077522	ENSG00000078124	ENSG00000078018	ENSG00000078725
								ENSG00000077549	ENSG00000078140	ENSG00000078043	ENSG00000078747
								ENSG00000077585	ENSG00000078142	ENSG00000078053	ENSG00000078804
								ENSG00000077616	ENSG00000078177	ENSG00000078061	ENSG00000078808
								ENSG00000077684	ENSG00000078237	ENSG00000078070	ENSG00000078902
								ENSG00000077713	ENSG00000078246	ENSG00000078081	ENSG00000078967
								ENSG00000077721	ENSG00000078269	ENSG00000078114	ENSG00000079101
								ENSG00000077782	ENSG00000078295	ENSG00000078124	ENSG00000079102
								ENSG00000077942	ENSG00000078304	ENSG00000078140	ENSG00000079134
								ENSG00000078018	ENSG00000078319	ENSG00000078142	ENSG00000079150
								ENSG00000078043	ENSG00000078328	ENSG00000078177	ENSG00000079156
								ENSG00000078053	ENSG00000078369	ENSG00000078237	ENSG00000079215
								ENSG00000078061	ENSG00000078401	ENSG00000078246	ENSG00000079246
								ENSG00000078070	ENSG00000078403	ENSG00000078269	ENSG00000079257
								ENSG00000078098	ENSG00000078487	ENSG00000078295	ENSG00000079277
								ENSG00000078114	ENSG00000078549	ENSG00000078304	ENSG00000079308
								ENSG00000078124	ENSG00000078596	ENSG00000078319	ENSG00000079313
								ENSG00000078140	ENSG00000078618	ENSG00000078328	ENSG00000079332
								ENSG00000078142	ENSG00000078668	ENSG00000078369	ENSG00000079335
								ENSG00000078177	ENSG00000078674	ENSG00000078401	ENSG00000079387
								ENSG00000078237	ENSG00000078687	ENSG00000078403	ENSG00000079432
								ENSG00000078246	ENSG00000078699	ENSG00000078487	ENSG00000079435
								ENSG00000078269	ENSG00000078725	ENSG00000078549	ENSG00000079459
								ENSG00000078295	ENSG00000078747	ENSG00000078579	ENSG00000079462
								ENSG00000078304	ENSG00000078804	ENSG00000078618	ENSG00000079482
								ENSG00000078319	ENSG00000078808	ENSG00000078668	ENSG00000079616
								ENSG00000078369	ENSG00000078902	ENSG00000078674	ENSG00000079689
								ENSG00000078401	ENSG00000078967	ENSG00000078687	ENSG00000079691
								ENSG00000078403	ENSG00000079102	ENSG00000078699	ENSG00000079739
								ENSG00000078487	ENSG00000079134	ENSG00000078725	ENSG00000079785
								ENSG00000078549	ENSG00000079150	ENSG00000078747	ENSG00000079805
								ENSG00000078596	ENSG00000079156	ENSG00000078804	ENSG00000079819
								ENSG00000078618	ENSG00000079215	ENSG00000078808	ENSG00000079841
								ENSG00000078668	ENSG00000079246	ENSG00000078900	ENSG00000079931
								ENSG00000078674	ENSG00000079257	ENSG00000078902	ENSG00000079950
								ENSG00000078687	ENSG00000079263	ENSG00000078967	ENSG00000079974
								ENSG00000078699	ENSG00000079277	ENSG00000079101	ENSG00000079999
								ENSG00000078725	ENSG00000079308	ENSG00000079102	ENSG00000080031
								ENSG00000078747	ENSG00000079313	ENSG00000079134	ENSG00000080189
								ENSG00000078804	ENSG00000079332	ENSG00000079150	ENSG00000080200
								ENSG00000078808	ENSG00000079335	ENSG00000079156	ENSG00000080224
								ENSG00000078902	ENSG00000079387	ENSG00000079215	ENSG00000080298
								ENSG00000078967	ENSG00000079432	ENSG00000079246	ENSG00000080345
								ENSG00000079102	ENSG00000079435	ENSG00000079257	ENSG00000080371
								ENSG00000079134	ENSG00000079459	ENSG00000079263	ENSG00000080493
								ENSG00000079150	ENSG00000079462	ENSG00000079277	ENSG00000080503
								ENSG00000079156	ENSG00000079482	ENSG00000079308	ENSG00000080546
								ENSG00000079215	ENSG00000079616	ENSG00000079313	ENSG00000080561
								ENSG00000079246	ENSG00000079689	ENSG00000079332	ENSG00000080573
								ENSG00000079257	ENSG00000079691	ENSG00000079335	ENSG00000080603
								ENSG00000079277	ENSG00000079739	ENSG00000079387	ENSG00000080608
								ENSG00000079308	ENSG00000079785	ENSG00000079432	ENSG00000080644
								ENSG00000079313	ENSG00000079805	ENSG00000079435	ENSG00000080709
								ENSG00000079332	ENSG00000079819	ENSG00000079459	ENSG00000080802
								ENSG00000079335	ENSG00000079841	ENSG00000079462	ENSG00000080815
								ENSG00000079387	ENSG00000079931	ENSG00000079482	ENSG00000080819
								ENSG00000079432	ENSG00000079950	ENSG00000079557	ENSG00000080822
								ENSG00000079435	ENSG00000079974	ENSG00000079616	ENSG00000080823
								ENSG00000079459	ENSG00000079999	ENSG00000079689	ENSG00000080824
								ENSG00000079462	ENSG00000080031	ENSG00000079691	ENSG00000080839
								ENSG00000079482	ENSG00000080166	ENSG00000079739	ENSG00000080845
								ENSG00000079616	ENSG00000080189	ENSG00000079785	ENSG00000080854
								ENSG00000079689	ENSG00000080200	ENSG00000079805	ENSG00000080947
								ENSG00000079691	ENSG00000080224	ENSG00000079819	ENSG00000080986
								ENSG00000079739	ENSG00000080298	ENSG00000079841	ENSG00000081014
								ENSG00000079785	ENSG00000080345	ENSG00000079931	ENSG00000081019
								ENSG00000079805	ENSG00000080371	ENSG00000079950	ENSG00000081026
								ENSG00000079819	ENSG00000080493	ENSG00000079974	ENSG00000081059
								ENSG00000079841	ENSG00000080503	ENSG00000079999	ENSG00000081087
								ENSG00000079931	ENSG00000080546	ENSG00000080031	ENSG00000081138
								ENSG00000079950	ENSG00000080561	ENSG00000080166	ENSG00000081148
								ENSG00000079974	ENSG00000080572	ENSG00000080189	ENSG00000081154
								ENSG00000079999	ENSG00000080603	ENSG00000080200	ENSG00000081177
								ENSG00000080031	ENSG00000080608	ENSG00000080224	ENSG00000081181
								ENSG00000080166	ENSG00000080644	ENSG00000080298	ENSG00000081189
								ENSG00000080189	ENSG00000080709	ENSG00000080345	ENSG00000081307
								ENSG00000080200	ENSG00000080802	ENSG00000080371	ENSG00000081320
								ENSG00000080224	ENSG00000080815	ENSG00000080493	ENSG00000081377
								ENSG00000080298	ENSG00000080819	ENSG00000080503	ENSG00000081386
								ENSG00000080345	ENSG00000080822	ENSG00000080546	ENSG00000081479
								ENSG00000080371	ENSG00000080823	ENSG00000080561	ENSG00000081665
								ENSG00000080493	ENSG00000080824	ENSG00000080573	ENSG00000081692
								ENSG00000080503	ENSG00000080839	ENSG00000080603	ENSG00000081721
								ENSG00000080546	ENSG00000080845	ENSG00000080608	ENSG00000081760
								ENSG00000080561	ENSG00000080854	ENSG00000080644	ENSG00000081791
								ENSG00000080572	ENSG00000080947	ENSG00000080709	ENSG00000081803
								ENSG00000080603	ENSG00000080986	ENSG00000080802	ENSG00000081818
								ENSG00000080608	ENSG00000081014	ENSG00000080815	ENSG00000081842
								ENSG00000080644	ENSG00000081019	ENSG00000080819	ENSG00000081853
								ENSG00000080709	ENSG00000081026	ENSG00000080822	ENSG00000081870
								ENSG00000080802	ENSG00000081051	ENSG00000080823	ENSG00000081913
								ENSG00000080815	ENSG00000081059	ENSG00000080824	ENSG00000082014
								ENSG00000080819	ENSG00000081087	ENSG00000080839	ENSG00000082068
								ENSG00000080822	ENSG00000081138	ENSG00000080845	ENSG00000082126
								ENSG00000080823	ENSG00000081148	ENSG00000080854	ENSG00000082146
								ENSG00000080824	ENSG00000081154	ENSG00000080947	ENSG00000082153
								ENSG00000080839	ENSG00000081177	ENSG00000080986	ENSG00000082196
								ENSG00000080845	ENSG00000081181	ENSG00000081014	ENSG00000082212
								ENSG00000080854	ENSG00000081189	ENSG00000081019	ENSG00000082213
								ENSG00000080947	ENSG00000081307	ENSG00000081026	ENSG00000082258
								ENSG00000080986	ENSG00000081320	ENSG00000081051	ENSG00000082269
								ENSG00000081014	ENSG00000081377	ENSG00000081059	ENSG00000082397
								ENSG00000081019	ENSG00000081386	ENSG00000081087	ENSG00000082438
								ENSG00000081026	ENSG00000081479	ENSG00000081138	ENSG00000082458
								ENSG00000081051	ENSG00000081665	ENSG00000081148	ENSG00000082482
								ENSG00000081059	ENSG00000081692	ENSG00000081154	ENSG00000082497
								ENSG00000081087	ENSG00000081721	ENSG00000081177	ENSG00000082512
								ENSG00000081138	ENSG00000081760	ENSG00000081181	ENSG00000082515
								ENSG00000081148	ENSG00000081791	ENSG00000081189	ENSG00000082516
								ENSG00000081154	ENSG00000081803	ENSG00000081307	ENSG00000082556
								ENSG00000081177	ENSG00000081818	ENSG00000081320	ENSG00000082641
								ENSG00000081181	ENSG00000081842	ENSG00000081377	ENSG00000082684
								ENSG00000081189	ENSG00000081853	ENSG00000081386	ENSG00000082701
								ENSG00000081307	ENSG00000081870	ENSG00000081479	ENSG00000082781
								ENSG00000081320	ENSG00000081913	ENSG00000081665	ENSG00000082805
								ENSG00000081377	ENSG00000082014	ENSG00000081692	ENSG00000082898
								ENSG00000081386	ENSG00000082068	ENSG00000081721	ENSG00000082996
								ENSG00000081479	ENSG00000082146	ENSG00000081760	ENSG00000083067
								ENSG00000081665	ENSG00000082153	ENSG00000081791	ENSG00000083093
								ENSG00000081692	ENSG00000082196	ENSG00000081803	ENSG00000083097
								ENSG00000081721	ENSG00000082212	ENSG00000081818	ENSG00000083099
								ENSG00000081760	ENSG00000082213	ENSG00000081842	ENSG00000083123
								ENSG00000081791	ENSG00000082258	ENSG00000081853	ENSG00000083168
								ENSG00000081803	ENSG00000082269	ENSG00000081870	ENSG00000083223
								ENSG00000081818	ENSG00000082397	ENSG00000081913	ENSG00000083290
								ENSG00000081842	ENSG00000082438	ENSG00000082014	ENSG00000083312
								ENSG00000081870	ENSG00000082458	ENSG00000082068	ENSG00000083444
								ENSG00000081913	ENSG00000082482	ENSG00000082126	ENSG00000083454
								ENSG00000082014	ENSG00000082497	ENSG00000082146	ENSG00000083457
								ENSG00000082068	ENSG00000082512	ENSG00000082153	ENSG00000083520
								ENSG00000082146	ENSG00000082515	ENSG00000082175	ENSG00000083535
								ENSG00000082153	ENSG00000082516	ENSG00000082196	ENSG00000083544
								ENSG00000082196	ENSG00000082641	ENSG00000082212	ENSG00000083635
								ENSG00000082212	ENSG00000082684	ENSG00000082213	ENSG00000083642
								ENSG00000082213	ENSG00000082701	ENSG00000082258	ENSG00000083720
								ENSG00000082258	ENSG00000082781	ENSG00000082269	ENSG00000083750
								ENSG00000082269	ENSG00000082805	ENSG00000082293	ENSG00000083799
								ENSG00000082397	ENSG00000082898	ENSG00000082397	ENSG00000083807
								ENSG00000082438	ENSG00000082996	ENSG00000082438	ENSG00000083812
								ENSG00000082458	ENSG00000083067	ENSG00000082458	ENSG00000083814
								ENSG00000082482	ENSG00000083093	ENSG00000082482	ENSG00000083817
								ENSG00000082497	ENSG00000083097	ENSG00000082497	ENSG00000083828
								ENSG00000082512	ENSG00000083099	ENSG00000082512	ENSG00000083838
								ENSG00000082515	ENSG00000083123	ENSG00000082515	ENSG00000083844
								ENSG00000082516	ENSG00000083168	ENSG00000082516	ENSG00000083845
								ENSG00000082556	ENSG00000083223	ENSG00000082556	ENSG00000083857
								ENSG00000082641	ENSG00000083290	ENSG00000082641	ENSG00000083896
								ENSG00000082684	ENSG00000083312	ENSG00000082684	ENSG00000083937
								ENSG00000082701	ENSG00000083444	ENSG00000082701	ENSG00000084070
								ENSG00000082781	ENSG00000083454	ENSG00000082781	ENSG00000084072
								ENSG00000082805	ENSG00000083457	ENSG00000082805	ENSG00000084073
								ENSG00000082898	ENSG00000083520	ENSG00000082898	ENSG00000084090
								ENSG00000082996	ENSG00000083535	ENSG00000082996	ENSG00000084092
								ENSG00000083067	ENSG00000083544	ENSG00000083067	ENSG00000084093
								ENSG00000083093	ENSG00000083635	ENSG00000083093	ENSG00000084112
								ENSG00000083097	ENSG00000083642	ENSG00000083097	ENSG00000084207
								ENSG00000083099	ENSG00000083720	ENSG00000083099	ENSG00000084234
								ENSG00000083123	ENSG00000083750	ENSG00000083123	ENSG00000084444
								ENSG00000083168	ENSG00000083799	ENSG00000083168	ENSG00000084453
								ENSG00000083223	ENSG00000083807	ENSG00000083223	ENSG00000084463
								ENSG00000083290	ENSG00000083812	ENSG00000083290	ENSG00000084623
								ENSG00000083312	ENSG00000083814	ENSG00000083312	ENSG00000084628
								ENSG00000083444	ENSG00000083817	ENSG00000083444	ENSG00000084652
								ENSG00000083454	ENSG00000083828	ENSG00000083454	ENSG00000084676
								ENSG00000083457	ENSG00000083838	ENSG00000083457	ENSG00000084693
								ENSG00000083520	ENSG00000083844	ENSG00000083520	ENSG00000084710
								ENSG00000083535	ENSG00000083845	ENSG00000083535	ENSG00000084731
								ENSG00000083544	ENSG00000083857	ENSG00000083544	ENSG00000084733
								ENSG00000083635	ENSG00000083896	ENSG00000083622	ENSG00000084754
								ENSG00000083642	ENSG00000083937	ENSG00000083635	ENSG00000084764
								ENSG00000083720	ENSG00000084070	ENSG00000083642	ENSG00000084774
								ENSG00000083750	ENSG00000084072	ENSG00000083720	ENSG00000085063
								ENSG00000083799	ENSG00000084073	ENSG00000083750	ENSG00000085185
								ENSG00000083807	ENSG00000084090	ENSG00000083799	ENSG00000085224
								ENSG00000083812	ENSG00000084092	ENSG00000083807	ENSG00000085231
								ENSG00000083814	ENSG00000084093	ENSG00000083812	ENSG00000085274
								ENSG00000083817	ENSG00000084112	ENSG00000083814	ENSG00000085365
								ENSG00000083828	ENSG00000084207	ENSG00000083817	ENSG00000085377
								ENSG00000083838	ENSG00000084234	ENSG00000083828	ENSG00000085382
								ENSG00000083844	ENSG00000084444	ENSG00000083838	ENSG00000085415
								ENSG00000083845	ENSG00000084453	ENSG00000083844	ENSG00000085433
								ENSG00000083857	ENSG00000084463	ENSG00000083845	ENSG00000085449
								ENSG00000083896	ENSG00000084623	ENSG00000083857	ENSG00000085465
								ENSG00000083937	ENSG00000084628	ENSG00000083896	ENSG00000085491
								ENSG00000084070	ENSG00000084652	ENSG00000083937	ENSG00000085511
								ENSG00000084072	ENSG00000084676	ENSG00000084070	ENSG00000085514
								ENSG00000084073	ENSG00000084693	ENSG00000084072	ENSG00000085552
								ENSG00000084090	ENSG00000084710	ENSG00000084073	ENSG00000085644
								ENSG00000084092	ENSG00000084731	ENSG00000084090	ENSG00000085662
								ENSG00000084093	ENSG00000084733	ENSG00000084092	ENSG00000085719
								ENSG00000084112	ENSG00000084734	ENSG00000084093	ENSG00000085721
								ENSG00000084207	ENSG00000084754	ENSG00000084112	ENSG00000085733
								ENSG00000084234	ENSG00000084764	ENSG00000084207	ENSG00000085760
								ENSG00000084444	ENSG00000084774	ENSG00000084234	ENSG00000085788
								ENSG00000084453	ENSG00000085063	ENSG00000084444	ENSG00000085832
								ENSG00000084463	ENSG00000085117	ENSG00000084453	ENSG00000085840
								ENSG00000084623	ENSG00000085185	ENSG00000084463	ENSG00000085871
								ENSG00000084628	ENSG00000085224	ENSG00000084623	ENSG00000085872
								ENSG00000084652	ENSG00000085231	ENSG00000084628	ENSG00000085978
								ENSG00000084676	ENSG00000085274	ENSG00000084636	ENSG00000085982
								ENSG00000084693	ENSG00000085276	ENSG00000084652	ENSG00000085998
								ENSG00000084710	ENSG00000085365	ENSG00000084676	ENSG00000085999
								ENSG00000084731	ENSG00000085377	ENSG00000084693	ENSG00000086015
								ENSG00000084733	ENSG00000085382	ENSG00000084710	ENSG00000086061
								ENSG00000084754	ENSG00000085415	ENSG00000084731	ENSG00000086062
								ENSG00000084764	ENSG00000085433	ENSG00000084733	ENSG00000086065
								ENSG00000084774	ENSG00000085449	ENSG00000084734	ENSG00000086102
								ENSG00000085063	ENSG00000085465	ENSG00000084754	ENSG00000086189
								ENSG00000085117	ENSG00000085491	ENSG00000084764	ENSG00000086200
								ENSG00000085185	ENSG00000085511	ENSG00000084774	ENSG00000086232
								ENSG00000085224	ENSG00000085514	ENSG00000085063	ENSG00000086289
								ENSG00000085231	ENSG00000085552	ENSG00000085185	ENSG00000086300
								ENSG00000085274	ENSG00000085644	ENSG00000085224	ENSG00000086475
								ENSG00000085276	ENSG00000085662	ENSG00000085231	ENSG00000086504
								ENSG00000085365	ENSG00000085719	ENSG00000085274	ENSG00000086544
								ENSG00000085377	ENSG00000085721	ENSG00000085276	ENSG00000086589
								ENSG00000085382	ENSG00000085733	ENSG00000085365	ENSG00000086598
								ENSG00000085415	ENSG00000085760	ENSG00000085377	ENSG00000086619
								ENSG00000085433	ENSG00000085788	ENSG00000085382	ENSG00000086666
								ENSG00000085449	ENSG00000085832	ENSG00000085415	ENSG00000086712
								ENSG00000085465	ENSG00000085840	ENSG00000085433	ENSG00000086717
								ENSG00000085491	ENSG00000085871	ENSG00000085449	ENSG00000086758
								ENSG00000085511	ENSG00000085872	ENSG00000085465	ENSG00000086827
								ENSG00000085514	ENSG00000085978	ENSG00000085491	ENSG00000086848
								ENSG00000085552	ENSG00000085982	ENSG00000085511	ENSG00000086991
								ENSG00000085563	ENSG00000085998	ENSG00000085514	ENSG00000087008
								ENSG00000085644	ENSG00000085999	ENSG00000085552	ENSG00000087053
								ENSG00000085662	ENSG00000086015	ENSG00000085644	ENSG00000087074
								ENSG00000085719	ENSG00000086061	ENSG00000085662	ENSG00000087076
								ENSG00000085721	ENSG00000086062	ENSG00000085719	ENSG00000087077
								ENSG00000085733	ENSG00000086065	ENSG00000085721	ENSG00000087085
								ENSG00000085760	ENSG00000086102	ENSG00000085733	ENSG00000087086
								ENSG00000085788	ENSG00000086189	ENSG00000085760	ENSG00000087087
								ENSG00000085832	ENSG00000086200	ENSG00000085788	ENSG00000087088
								ENSG00000085840	ENSG00000086205	ENSG00000085831	ENSG00000087095
								ENSG00000085871	ENSG00000086232	ENSG00000085832	ENSG00000087111
								ENSG00000085872	ENSG00000086288	ENSG00000085840	ENSG00000087152
								ENSG00000085978	ENSG00000086289	ENSG00000085871	ENSG00000087157
								ENSG00000085982	ENSG00000086300	ENSG00000085872	ENSG00000087191
								ENSG00000085998	ENSG00000086475	ENSG00000085978	ENSG00000087206
								ENSG00000085999	ENSG00000086504	ENSG00000085982	ENSG00000087245
								ENSG00000086015	ENSG00000086506	ENSG00000085998	ENSG00000087253
								ENSG00000086061	ENSG00000086544	ENSG00000085999	ENSG00000087258
								ENSG00000086062	ENSG00000086589	ENSG00000086015	ENSG00000087263
								ENSG00000086065	ENSG00000086598	ENSG00000086061	ENSG00000087266
								ENSG00000086102	ENSG00000086619	ENSG00000086062	ENSG00000087269
								ENSG00000086189	ENSG00000086666	ENSG00000086065	ENSG00000087274
								ENSG00000086200	ENSG00000086712	ENSG00000086102	ENSG00000087299
								ENSG00000086205	ENSG00000086717	ENSG00000086189	ENSG00000087301
								ENSG00000086232	ENSG00000086758	ENSG00000086200	ENSG00000087302
								ENSG00000086288	ENSG00000086827	ENSG00000086232	ENSG00000087303
								ENSG00000086289	ENSG00000086848	ENSG00000086288	ENSG00000087338
								ENSG00000086300	ENSG00000086991	ENSG00000086289	ENSG00000087365
								ENSG00000086475	ENSG00000087008	ENSG00000086300	ENSG00000087448
								ENSG00000086504	ENSG00000087053	ENSG00000086475	ENSG00000087460
								ENSG00000086506	ENSG00000087074	ENSG00000086504	ENSG00000087470
								ENSG00000086544	ENSG00000087076	ENSG00000086506	ENSG00000087495
								ENSG00000086589	ENSG00000087077	ENSG00000086544	ENSG00000087502
								ENSG00000086598	ENSG00000087085	ENSG00000086589	ENSG00000087586
								ENSG00000086619	ENSG00000087086	ENSG00000086598	ENSG00000087842
								ENSG00000086666	ENSG00000087087	ENSG00000086619	ENSG00000087884
								ENSG00000086712	ENSG00000087088	ENSG00000086666	ENSG00000087903
								ENSG00000086717	ENSG00000087095	ENSG00000086696	ENSG00000087995
								ENSG00000086758	ENSG00000087111	ENSG00000086712	ENSG00000088035
								ENSG00000086827	ENSG00000087116	ENSG00000086717	ENSG00000088038
								ENSG00000086848	ENSG00000087152	ENSG00000086758	ENSG00000088179
								ENSG00000086991	ENSG00000087157	ENSG00000086827	ENSG00000088205
								ENSG00000087008	ENSG00000087191	ENSG00000086848	ENSG00000088247
								ENSG00000087053	ENSG00000087206	ENSG00000086991	ENSG00000088256
								ENSG00000087074	ENSG00000087245	ENSG00000087008	ENSG00000088280
								ENSG00000087076	ENSG00000087253	ENSG00000087053	ENSG00000088298
								ENSG00000087077	ENSG00000087258	ENSG00000087074	ENSG00000088305
								ENSG00000087085	ENSG00000087263	ENSG00000087076	ENSG00000088325
								ENSG00000087086	ENSG00000087266	ENSG00000087077	ENSG00000088356
								ENSG00000087087	ENSG00000087269	ENSG00000087085	ENSG00000088367
								ENSG00000087088	ENSG00000087274	ENSG00000087086	ENSG00000088387
								ENSG00000087095	ENSG00000087299	ENSG00000087087	ENSG00000088448
								ENSG00000087111	ENSG00000087301	ENSG00000087088	ENSG00000088451
								ENSG00000087116	ENSG00000087302	ENSG00000087095	ENSG00000088538
								ENSG00000087152	ENSG00000087338	ENSG00000087111	ENSG00000088543
								ENSG00000087157	ENSG00000087365	ENSG00000087116	ENSG00000088682
								ENSG00000087191	ENSG00000087448	ENSG00000087152	ENSG00000088727
								ENSG00000087206	ENSG00000087460	ENSG00000087157	ENSG00000088756
								ENSG00000087245	ENSG00000087470	ENSG00000087191	ENSG00000088766
								ENSG00000087253	ENSG00000087495	ENSG00000087206	ENSG00000088808
								ENSG00000087258	ENSG00000087502	ENSG00000087237	ENSG00000088812
								ENSG00000087263	ENSG00000087510	ENSG00000087245	ENSG00000088826
								ENSG00000087266	ENSG00000087586	ENSG00000087253	ENSG00000088832
								ENSG00000087269	ENSG00000087842	ENSG00000087258	ENSG00000088833
								ENSG00000087274	ENSG00000087884	ENSG00000087263	ENSG00000088836
								ENSG00000087299	ENSG00000087903	ENSG00000087266	ENSG00000088854
								ENSG00000087301	ENSG00000087995	ENSG00000087269	ENSG00000088876
								ENSG00000087302	ENSG00000088035	ENSG00000087274	ENSG00000088881
								ENSG00000087338	ENSG00000088038	ENSG00000087299	ENSG00000088882
								ENSG00000087365	ENSG00000088179	ENSG00000087301	ENSG00000088888
								ENSG00000087448	ENSG00000088205	ENSG00000087302	ENSG00000088899
								ENSG00000087460	ENSG00000088247	ENSG00000087303	ENSG00000088930
								ENSG00000087470	ENSG00000088256	ENSG00000087338	ENSG00000088970
								ENSG00000087495	ENSG00000088280	ENSG00000087365	ENSG00000088986
								ENSG00000087502	ENSG00000088298	ENSG00000087448	ENSG00000088992
								ENSG00000087510	ENSG00000088305	ENSG00000087460	ENSG00000089006
								ENSG00000087586	ENSG00000088325	ENSG00000087470	ENSG00000089009
								ENSG00000087842	ENSG00000088340	ENSG00000087494	ENSG00000089022
								ENSG00000087884	ENSG00000088356	ENSG00000087495	ENSG00000089048
								ENSG00000087903	ENSG00000088367	ENSG00000087502	ENSG00000089050
								ENSG00000087995	ENSG00000088387	ENSG00000087510	ENSG00000089053
								ENSG00000088035	ENSG00000088448	ENSG00000087586	ENSG00000089057
								ENSG00000088038	ENSG00000088451	ENSG00000087842	ENSG00000089060
								ENSG00000088179	ENSG00000088538	ENSG00000087884	ENSG00000089063
								ENSG00000088205	ENSG00000088543	ENSG00000087903	ENSG00000089091
								ENSG00000088247	ENSG00000088682	ENSG00000087995	ENSG00000089094
								ENSG00000088256	ENSG00000088727	ENSG00000088035	ENSG00000089101
								ENSG00000088280	ENSG00000088756	ENSG00000088038	ENSG00000089116
								ENSG00000088298	ENSG00000088766	ENSG00000088179	ENSG00000089123
								ENSG00000088305	ENSG00000088808	ENSG00000088205	ENSG00000089154
								ENSG00000088325	ENSG00000088812	ENSG00000088247	ENSG00000089157
								ENSG00000088340	ENSG00000088826	ENSG00000088256	ENSG00000089159
								ENSG00000088356	ENSG00000088832	ENSG00000088280	ENSG00000089163
								ENSG00000088367	ENSG00000088833	ENSG00000088298	ENSG00000089169
								ENSG00000088387	ENSG00000088836	ENSG00000088305	ENSG00000089177
								ENSG00000088448	ENSG00000088854	ENSG00000088325	ENSG00000089195
								ENSG00000088451	ENSG00000088876	ENSG00000088356	ENSG00000089199
								ENSG00000088538	ENSG00000088881	ENSG00000088367	ENSG00000089220
								ENSG00000088543	ENSG00000088882	ENSG00000088387	ENSG00000089234
								ENSG00000088682	ENSG00000088888	ENSG00000088448	ENSG00000089248
								ENSG00000088727	ENSG00000088899	ENSG00000088451	ENSG00000089280
								ENSG00000088756	ENSG00000088930	ENSG00000088538	ENSG00000089289
								ENSG00000088766	ENSG00000088970	ENSG00000088543	ENSG00000089335
								ENSG00000088808	ENSG00000088986	ENSG00000088682	ENSG00000089351
								ENSG00000088812	ENSG00000088992	ENSG00000088727	ENSG00000089472
								ENSG00000088826	ENSG00000089006	ENSG00000088756	ENSG00000089486
								ENSG00000088832	ENSG00000089009	ENSG00000088766	ENSG00000089505
								ENSG00000088833	ENSG00000089022	ENSG00000088808	ENSG00000089558
								ENSG00000088854	ENSG00000089048	ENSG00000088812	ENSG00000089597
								ENSG00000088876	ENSG00000089050	ENSG00000088826	ENSG00000089639
								ENSG00000088881	ENSG00000089053	ENSG00000088832	ENSG00000089682
								ENSG00000088882	ENSG00000089057	ENSG00000088833	ENSG00000089685
								ENSG00000088888	ENSG00000089060	ENSG00000088854	ENSG00000089692
								ENSG00000088899	ENSG00000089063	ENSG00000088876	ENSG00000089693
								ENSG00000088930	ENSG00000089091	ENSG00000088881	ENSG00000089723
								ENSG00000088970	ENSG00000089094	ENSG00000088882	ENSG00000089737
								ENSG00000088986	ENSG00000089101	ENSG00000088888	ENSG00000089775
								ENSG00000088992	ENSG00000089116	ENSG00000088899	ENSG00000089818
								ENSG00000089006	ENSG00000089123	ENSG00000088930	ENSG00000089820
								ENSG00000089009	ENSG00000089154	ENSG00000088970	ENSG00000089847
								ENSG00000089022	ENSG00000089157	ENSG00000088986	ENSG00000089876
								ENSG00000089048	ENSG00000089159	ENSG00000088992	ENSG00000089902
								ENSG00000089050	ENSG00000089163	ENSG00000089006	ENSG00000089916
								ENSG00000089053	ENSG00000089177	ENSG00000089009	ENSG00000090006
								ENSG00000089057	ENSG00000089195	ENSG00000089022	ENSG00000090013
								ENSG00000089060	ENSG00000089199	ENSG00000089048	ENSG00000090020
								ENSG00000089063	ENSG00000089220	ENSG00000089050	ENSG00000090054
								ENSG00000089091	ENSG00000089234	ENSG00000089053	ENSG00000090060
								ENSG00000089094	ENSG00000089248	ENSG00000089057	ENSG00000090061
								ENSG00000089101	ENSG00000089280	ENSG00000089063	ENSG00000090097
								ENSG00000089116	ENSG00000089289	ENSG00000089091	ENSG00000090104
								ENSG00000089123	ENSG00000089327	ENSG00000089094	ENSG00000090238
								ENSG00000089154	ENSG00000089335	ENSG00000089101	ENSG00000090263
								ENSG00000089157	ENSG00000089351	ENSG00000089116	ENSG00000090266
								ENSG00000089159	ENSG00000089472	ENSG00000089123	ENSG00000090273
								ENSG00000089163	ENSG00000089486	ENSG00000089154	ENSG00000090316
								ENSG00000089177	ENSG00000089505	ENSG00000089157	ENSG00000090372
								ENSG00000089195	ENSG00000089558	ENSG00000089159	ENSG00000090382
								ENSG00000089199	ENSG00000089597	ENSG00000089163	ENSG00000090432
								ENSG00000089220	ENSG00000089639	ENSG00000089169	ENSG00000090447
								ENSG00000089234	ENSG00000089682	ENSG00000089177	ENSG00000090470
								ENSG00000089248	ENSG00000089685	ENSG00000089195	ENSG00000090487
								ENSG00000089280	ENSG00000089692	ENSG00000089199	ENSG00000090512
								ENSG00000089289	ENSG00000089693	ENSG00000089220	ENSG00000090520
								ENSG00000089335	ENSG00000089723	ENSG00000089234	ENSG00000090530
								ENSG00000089351	ENSG00000089737	ENSG00000089248	ENSG00000090539
								ENSG00000089472	ENSG00000089775	ENSG00000089280	ENSG00000090565
								ENSG00000089486	ENSG00000089818	ENSG00000089289	ENSG00000090581
								ENSG00000089505	ENSG00000089820	ENSG00000089335	ENSG00000090612
								ENSG00000089597	ENSG00000089847	ENSG00000089351	ENSG00000090615
								ENSG00000089639	ENSG00000089876	ENSG00000089472	ENSG00000090621
								ENSG00000089682	ENSG00000089902	ENSG00000089486	ENSG00000090661
								ENSG00000089685	ENSG00000089916	ENSG00000089505	ENSG00000090674
								ENSG00000089692	ENSG00000090006	ENSG00000089558	ENSG00000090686
								ENSG00000089693	ENSG00000090013	ENSG00000089597	ENSG00000090776
								ENSG00000089723	ENSG00000090020	ENSG00000089639	ENSG00000090857
								ENSG00000089737	ENSG00000090054	ENSG00000089682	ENSG00000090861
								ENSG00000089775	ENSG00000090060	ENSG00000089685	ENSG00000090863
								ENSG00000089818	ENSG00000090061	ENSG00000089692	ENSG00000090889
								ENSG00000089820	ENSG00000090097	ENSG00000089693	ENSG00000090905
								ENSG00000089847	ENSG00000090238	ENSG00000089723	ENSG00000090924
								ENSG00000089876	ENSG00000090263	ENSG00000089737	ENSG00000090932
								ENSG00000089902	ENSG00000090266	ENSG00000089775	ENSG00000090971
								ENSG00000089916	ENSG00000090273	ENSG00000089818	ENSG00000090975
								ENSG00000090006	ENSG00000090316	ENSG00000089820	ENSG00000090989
								ENSG00000090013	ENSG00000090372	ENSG00000089847	ENSG00000091009
								ENSG00000090020	ENSG00000090376	ENSG00000089876	ENSG00000091039
								ENSG00000090054	ENSG00000090432	ENSG00000089902	ENSG00000091073
								ENSG00000090060	ENSG00000090447	ENSG00000089916	ENSG00000091127
								ENSG00000090061	ENSG00000090470	ENSG00000090006	ENSG00000091128
								ENSG00000090097	ENSG00000090487	ENSG00000090013	ENSG00000091129
								ENSG00000090238	ENSG00000090520	ENSG00000090020	ENSG00000091136
								ENSG00000090263	ENSG00000090530	ENSG00000090054	ENSG00000091140
								ENSG00000090266	ENSG00000090539	ENSG00000090060	ENSG00000091157
								ENSG00000090273	ENSG00000090565	ENSG00000090061	ENSG00000091164
								ENSG00000090316	ENSG00000090581	ENSG00000090097	ENSG00000091181
								ENSG00000090372	ENSG00000090612	ENSG00000090238	ENSG00000091317
								ENSG00000090376	ENSG00000090615	ENSG00000090263	ENSG00000091409
								ENSG00000090432	ENSG00000090621	ENSG00000090266	ENSG00000091428
								ENSG00000090447	ENSG00000090661	ENSG00000090273	ENSG00000091436
								ENSG00000090470	ENSG00000090674	ENSG00000090316	ENSG00000091483
								ENSG00000090487	ENSG00000090686	ENSG00000090372	ENSG00000091490
								ENSG00000090520	ENSG00000090776	ENSG00000090432	ENSG00000091513
								ENSG00000090530	ENSG00000090857	ENSG00000090447	ENSG00000091527
								ENSG00000090539	ENSG00000090861	ENSG00000090470	ENSG00000091536
								ENSG00000090565	ENSG00000090863	ENSG00000090487	ENSG00000091542
								ENSG00000090581	ENSG00000090889	ENSG00000090520	ENSG00000091622
								ENSG00000090612	ENSG00000090905	ENSG00000090530	ENSG00000091640
								ENSG00000090615	ENSG00000090924	ENSG00000090539	ENSG00000091651
								ENSG00000090621	ENSG00000090932	ENSG00000090565	ENSG00000091656
								ENSG00000090661	ENSG00000090971	ENSG00000090581	ENSG00000091664
								ENSG00000090674	ENSG00000090975	ENSG00000090612	ENSG00000091732
								ENSG00000090686	ENSG00000090989	ENSG00000090615	ENSG00000091844
								ENSG00000090776	ENSG00000091009	ENSG00000090621	ENSG00000091947
								ENSG00000090857	ENSG00000091039	ENSG00000090661	ENSG00000091972
								ENSG00000090861	ENSG00000091073	ENSG00000090674	ENSG00000091986
								ENSG00000090863	ENSG00000091127	ENSG00000090686	ENSG00000092010
								ENSG00000090889	ENSG00000091129	ENSG00000090776	ENSG00000092020
								ENSG00000090905	ENSG00000091136	ENSG00000090857	ENSG00000092036
								ENSG00000090924	ENSG00000091140	ENSG00000090861	ENSG00000092051
								ENSG00000090932	ENSG00000091157	ENSG00000090863	ENSG00000092054
								ENSG00000090971	ENSG00000091164	ENSG00000090889	ENSG00000092068
								ENSG00000090975	ENSG00000091262	ENSG00000090905	ENSG00000092094
								ENSG00000090989	ENSG00000091317	ENSG00000090924	ENSG00000092096
								ENSG00000091009	ENSG00000091409	ENSG00000090932	ENSG00000092098
								ENSG00000091039	ENSG00000091428	ENSG00000090971	ENSG00000092108
								ENSG00000091073	ENSG00000091436	ENSG00000090975	ENSG00000092140
								ENSG00000091127	ENSG00000091483	ENSG00000090989	ENSG00000092148
								ENSG00000091129	ENSG00000091490	ENSG00000091009	ENSG00000092199
								ENSG00000091136	ENSG00000091513	ENSG00000091039	ENSG00000092201
								ENSG00000091140	ENSG00000091527	ENSG00000091073	ENSG00000092203
								ENSG00000091157	ENSG00000091536	ENSG00000091127	ENSG00000092208
								ENSG00000091164	ENSG00000091542	ENSG00000091128	ENSG00000092295
								ENSG00000091317	ENSG00000091622	ENSG00000091129	ENSG00000092330
								ENSG00000091409	ENSG00000091640	ENSG00000091136	ENSG00000092377
								ENSG00000091428	ENSG00000091651	ENSG00000091137	ENSG00000092421
								ENSG00000091436	ENSG00000091656	ENSG00000091140	ENSG00000092439
								ENSG00000091483	ENSG00000091664	ENSG00000091157	ENSG00000092445
								ENSG00000091490	ENSG00000091732	ENSG00000091164	ENSG00000092470
								ENSG00000091513	ENSG00000091844	ENSG00000091181	ENSG00000092531
								ENSG00000091527	ENSG00000091947	ENSG00000091317	ENSG00000092621
								ENSG00000091542	ENSG00000091972	ENSG00000091409	ENSG00000092758
								ENSG00000091622	ENSG00000092010	ENSG00000091428	ENSG00000092820
								ENSG00000091640	ENSG00000092020	ENSG00000091436	ENSG00000092841
								ENSG00000091651	ENSG00000092036	ENSG00000091483	ENSG00000092847
								ENSG00000091656	ENSG00000092051	ENSG00000091490	ENSG00000092850
								ENSG00000091664	ENSG00000092068	ENSG00000091513	ENSG00000092853
								ENSG00000091732	ENSG00000092094	ENSG00000091527	ENSG00000092871
								ENSG00000091844	ENSG00000092096	ENSG00000091542	ENSG00000092931
								ENSG00000091879	ENSG00000092098	ENSG00000091583	ENSG00000092964
								ENSG00000091947	ENSG00000092108	ENSG00000091622	ENSG00000092969
								ENSG00000091972	ENSG00000092140	ENSG00000091640	ENSG00000092978
								ENSG00000091986	ENSG00000092148	ENSG00000091651	ENSG00000093000
								ENSG00000092010	ENSG00000092199	ENSG00000091656	ENSG00000093009
								ENSG00000092020	ENSG00000092201	ENSG00000091664	ENSG00000093010
								ENSG00000092036	ENSG00000092203	ENSG00000091732	ENSG00000093072
								ENSG00000092051	ENSG00000092208	ENSG00000091844	ENSG00000093144
								ENSG00000092054	ENSG00000092295	ENSG00000091947	ENSG00000093167
								ENSG00000092068	ENSG00000092330	ENSG00000091972	ENSG00000093183
								ENSG00000092094	ENSG00000092377	ENSG00000091986	ENSG00000093217
								ENSG00000092096	ENSG00000092421	ENSG00000092010	ENSG00000094631
								ENSG00000092098	ENSG00000092439	ENSG00000092020	ENSG00000094804
								ENSG00000092108	ENSG00000092445	ENSG00000092036	ENSG00000094841
								ENSG00000092140	ENSG00000092470	ENSG00000092051	ENSG00000094880
								ENSG00000092148	ENSG00000092531	ENSG00000092054	ENSG00000094914
								ENSG00000092199	ENSG00000092621	ENSG00000092068	ENSG00000094916
								ENSG00000092201	ENSG00000092758	ENSG00000092094	ENSG00000094975
								ENSG00000092203	ENSG00000092820	ENSG00000092096	ENSG00000095002
								ENSG00000092208	ENSG00000092841	ENSG00000092098	ENSG00000095015
								ENSG00000092295	ENSG00000092847	ENSG00000092108	ENSG00000095059
								ENSG00000092330	ENSG00000092850	ENSG00000092140	ENSG00000095066
								ENSG00000092377	ENSG00000092853	ENSG00000092148	ENSG00000095139
								ENSG00000092421	ENSG00000092871	ENSG00000092199	ENSG00000095203
								ENSG00000092439	ENSG00000092931	ENSG00000092200	ENSG00000095209
								ENSG00000092445	ENSG00000092964	ENSG00000092201	ENSG00000095261
								ENSG00000092470	ENSG00000092969	ENSG00000092203	ENSG00000095319
								ENSG00000092531	ENSG00000092978	ENSG00000092208	ENSG00000095321
								ENSG00000092621	ENSG00000093000	ENSG00000092295	ENSG00000095370
								ENSG00000092758	ENSG00000093009	ENSG00000092330	ENSG00000095380
								ENSG00000092820	ENSG00000093010	ENSG00000092421	ENSG00000095383
								ENSG00000092841	ENSG00000093072	ENSG00000092439	ENSG00000095397
								ENSG00000092847	ENSG00000093144	ENSG00000092445	ENSG00000095485
								ENSG00000092850	ENSG00000093167	ENSG00000092470	ENSG00000095539
								ENSG00000092853	ENSG00000093183	ENSG00000092531	ENSG00000095564
								ENSG00000092871	ENSG00000093217	ENSG00000092621	ENSG00000095574
								ENSG00000092929	ENSG00000094631	ENSG00000092758	ENSG00000095596
								ENSG00000092931	ENSG00000094804	ENSG00000092820	ENSG00000095637
								ENSG00000092964	ENSG00000094841	ENSG00000092841	ENSG00000095713
								ENSG00000092969	ENSG00000094880	ENSG00000092847	ENSG00000095739
								ENSG00000092978	ENSG00000094914	ENSG00000092850	ENSG00000095752
								ENSG00000093000	ENSG00000094916	ENSG00000092853	ENSG00000095777
								ENSG00000093009	ENSG00000094975	ENSG00000092871	ENSG00000095787
								ENSG00000093010	ENSG00000095002	ENSG00000092931	ENSG00000095794
								ENSG00000093072	ENSG00000095015	ENSG00000092964	ENSG00000095906
								ENSG00000093144	ENSG00000095059	ENSG00000092969	ENSG00000095951
								ENSG00000093167	ENSG00000095066	ENSG00000092978	ENSG00000096060
								ENSG00000093183	ENSG00000095139	ENSG00000093000	ENSG00000096063
								ENSG00000093217	ENSG00000095203	ENSG00000093009	ENSG00000096070
								ENSG00000094631	ENSG00000095209	ENSG00000093010	ENSG00000096080
								ENSG00000094804	ENSG00000095261	ENSG00000093072	ENSG00000096092
								ENSG00000094841	ENSG00000095319	ENSG00000093144	ENSG00000096093
								ENSG00000094880	ENSG00000095321	ENSG00000093167	ENSG00000096384
								ENSG00000094914	ENSG00000095370	ENSG00000093183	ENSG00000096401
								ENSG00000094916	ENSG00000095380	ENSG00000093217	ENSG00000096654
								ENSG00000094975	ENSG00000095383	ENSG00000094631	ENSG00000096696
								ENSG00000095002	ENSG00000095397	ENSG00000094804	ENSG00000096717
								ENSG00000095015	ENSG00000095485	ENSG00000094841	ENSG00000096746
								ENSG00000095059	ENSG00000095539	ENSG00000094880	ENSG00000096872
								ENSG00000095066	ENSG00000095564	ENSG00000094914	ENSG00000096968
								ENSG00000095139	ENSG00000095574	ENSG00000094916	ENSG00000097007
								ENSG00000095203	ENSG00000095637	ENSG00000094975	ENSG00000097021
								ENSG00000095209	ENSG00000095713	ENSG00000095002	ENSG00000097033
								ENSG00000095261	ENSG00000095739	ENSG00000095015	ENSG00000097046
								ENSG00000095303	ENSG00000095752	ENSG00000095059	ENSG00000097096
								ENSG00000095319	ENSG00000095777	ENSG00000095066	ENSG00000099139
								ENSG00000095321	ENSG00000095787	ENSG00000095139	ENSG00000099194
								ENSG00000095370	ENSG00000095794	ENSG00000095203	ENSG00000099203
								ENSG00000095380	ENSG00000095906	ENSG00000095209	ENSG00000099204
								ENSG00000095383	ENSG00000095951	ENSG00000095261	ENSG00000099219
								ENSG00000095397	ENSG00000096060	ENSG00000095319	ENSG00000099246
								ENSG00000095485	ENSG00000096063	ENSG00000095321	ENSG00000099250
								ENSG00000095539	ENSG00000096070	ENSG00000095370	ENSG00000099251
								ENSG00000095564	ENSG00000096080	ENSG00000095380	ENSG00000099256
								ENSG00000095574	ENSG00000096092	ENSG00000095383	ENSG00000099260
								ENSG00000095596	ENSG00000096093	ENSG00000095397	ENSG00000099282
								ENSG00000095637	ENSG00000096384	ENSG00000095485	ENSG00000099284
								ENSG00000095713	ENSG00000096395	ENSG00000095539	ENSG00000099290
								ENSG00000095739	ENSG00000096401	ENSG00000095564	ENSG00000099308
								ENSG00000095777	ENSG00000096654	ENSG00000095574	ENSG00000099326
								ENSG00000095787	ENSG00000096696	ENSG00000095596	ENSG00000099330
								ENSG00000095794	ENSG00000096717	ENSG00000095637	ENSG00000099331
								ENSG00000095906	ENSG00000096746	ENSG00000095713	ENSG00000099338
								ENSG00000095951	ENSG00000096872	ENSG00000095739	ENSG00000099341
								ENSG00000096060	ENSG00000096968	ENSG00000095752	ENSG00000099364
								ENSG00000096063	ENSG00000097007	ENSG00000095777	ENSG00000099365
								ENSG00000096070	ENSG00000097021	ENSG00000095787	ENSG00000099377
								ENSG00000096080	ENSG00000097033	ENSG00000095794	ENSG00000099381
								ENSG00000096092	ENSG00000097046	ENSG00000095906	ENSG00000099385
								ENSG00000096093	ENSG00000097096	ENSG00000095951	ENSG00000099617
								ENSG00000096384	ENSG00000099139	ENSG00000096060	ENSG00000099622
								ENSG00000096401	ENSG00000099194	ENSG00000096063	ENSG00000099624
								ENSG00000096654	ENSG00000099203	ENSG00000096070	ENSG00000099625
								ENSG00000096696	ENSG00000099204	ENSG00000096080	ENSG00000099715
								ENSG00000096717	ENSG00000099219	ENSG00000096092	ENSG00000099725
								ENSG00000096746	ENSG00000099246	ENSG00000096093	ENSG00000099783
								ENSG00000096872	ENSG00000099250	ENSG00000096384	ENSG00000099785
								ENSG00000096968	ENSG00000099251	ENSG00000096395	ENSG00000099795
								ENSG00000097007	ENSG00000099256	ENSG00000096401	ENSG00000099797
								ENSG00000097021	ENSG00000099260	ENSG00000096654	ENSG00000099800
								ENSG00000097033	ENSG00000099282	ENSG00000096696	ENSG00000099804
								ENSG00000097046	ENSG00000099284	ENSG00000096717	ENSG00000099810
								ENSG00000097096	ENSG00000099290	ENSG00000096746	ENSG00000099814
								ENSG00000099139	ENSG00000099308	ENSG00000096872	ENSG00000099817
								ENSG00000099194	ENSG00000099326	ENSG00000096968	ENSG00000099821
								ENSG00000099203	ENSG00000099330	ENSG00000097007	ENSG00000099822
								ENSG00000099204	ENSG00000099331	ENSG00000097021	ENSG00000099840
								ENSG00000099219	ENSG00000099338	ENSG00000097033	ENSG00000099849
								ENSG00000099246	ENSG00000099341	ENSG00000097046	ENSG00000099860
								ENSG00000099250	ENSG00000099364	ENSG00000097096	ENSG00000099864
								ENSG00000099251	ENSG00000099365	ENSG00000099139	ENSG00000099866
								ENSG00000099256	ENSG00000099377	ENSG00000099194	ENSG00000099875
								ENSG00000099260	ENSG00000099381	ENSG00000099203	ENSG00000099889
								ENSG00000099282	ENSG00000099385	ENSG00000099204	ENSG00000099899
								ENSG00000099284	ENSG00000099617	ENSG00000099219	ENSG00000099901
								ENSG00000099290	ENSG00000099622	ENSG00000099246	ENSG00000099904
								ENSG00000099308	ENSG00000099624	ENSG00000099250	ENSG00000099910
								ENSG00000099326	ENSG00000099625	ENSG00000099256	ENSG00000099917
								ENSG00000099330	ENSG00000099715	ENSG00000099260	ENSG00000099940
								ENSG00000099331	ENSG00000099725	ENSG00000099282	ENSG00000099942
								ENSG00000099338	ENSG00000099783	ENSG00000099284	ENSG00000099949
								ENSG00000099341	ENSG00000099785	ENSG00000099290	ENSG00000099953
								ENSG00000099364	ENSG00000099795	ENSG00000099308	ENSG00000099954
								ENSG00000099365	ENSG00000099797	ENSG00000099326	ENSG00000099956
								ENSG00000099377	ENSG00000099800	ENSG00000099330	ENSG00000099957
								ENSG00000099381	ENSG00000099804	ENSG00000099331	ENSG00000099958
								ENSG00000099385	ENSG00000099810	ENSG00000099338	ENSG00000099960
								ENSG00000099617	ENSG00000099814	ENSG00000099341	ENSG00000099968
								ENSG00000099622	ENSG00000099817	ENSG00000099364	ENSG00000099974
								ENSG00000099624	ENSG00000099821	ENSG00000099365	ENSG00000099977
								ENSG00000099625	ENSG00000099822	ENSG00000099377	ENSG00000099991
								ENSG00000099715	ENSG00000099840	ENSG00000099381	ENSG00000099992
								ENSG00000099725	ENSG00000099849	ENSG00000099385	ENSG00000099994
								ENSG00000099783	ENSG00000099860	ENSG00000099617	ENSG00000099995
								ENSG00000099785	ENSG00000099864	ENSG00000099622	ENSG00000099999
								ENSG00000099795	ENSG00000099866	ENSG00000099624	ENSG00000100014
								ENSG00000099797	ENSG00000099875	ENSG00000099625	ENSG00000100023
								ENSG00000099800	ENSG00000099889	ENSG00000099715	ENSG00000100027
								ENSG00000099804	ENSG00000099899	ENSG00000099725	ENSG00000100028
								ENSG00000099810	ENSG00000099901	ENSG00000099783	ENSG00000100029
								ENSG00000099814	ENSG00000099904	ENSG00000099785	ENSG00000100030
								ENSG00000099817	ENSG00000099910	ENSG00000099795	ENSG00000100031
								ENSG00000099821	ENSG00000099917	ENSG00000099797	ENSG00000100034
								ENSG00000099822	ENSG00000099940	ENSG00000099800	ENSG00000100036
								ENSG00000099840	ENSG00000099942	ENSG00000099804	ENSG00000100038
								ENSG00000099849	ENSG00000099949	ENSG00000099810	ENSG00000100056
								ENSG00000099860	ENSG00000099953	ENSG00000099812	ENSG00000100058
								ENSG00000099864	ENSG00000099954	ENSG00000099814	ENSG00000100065
								ENSG00000099866	ENSG00000099956	ENSG00000099817	ENSG00000100068
								ENSG00000099875	ENSG00000099957	ENSG00000099821	ENSG00000100075
								ENSG00000099889	ENSG00000099958	ENSG00000099822	ENSG00000100077
								ENSG00000099899	ENSG00000099960	ENSG00000099840	ENSG00000100079
								ENSG00000099901	ENSG00000099968	ENSG00000099849	ENSG00000100083
								ENSG00000099904	ENSG00000099974	ENSG00000099860	ENSG00000100084
								ENSG00000099910	ENSG00000099977	ENSG00000099864	ENSG00000100092
								ENSG00000099917	ENSG00000099991	ENSG00000099866	ENSG00000100095
								ENSG00000099940	ENSG00000099992	ENSG00000099875	ENSG00000100099
								ENSG00000099942	ENSG00000099994	ENSG00000099889	ENSG00000100100
								ENSG00000099949	ENSG00000099995	ENSG00000099899	ENSG00000100104
								ENSG00000099953	ENSG00000099999	ENSG00000099901	ENSG00000100105
								ENSG00000099954	ENSG00000100003	ENSG00000099904	ENSG00000100106
								ENSG00000099956	ENSG00000100014	ENSG00000099910	ENSG00000100109
								ENSG00000099957	ENSG00000100023	ENSG00000099917	ENSG00000100116
								ENSG00000099958	ENSG00000100027	ENSG00000099940	ENSG00000100124
								ENSG00000099960	ENSG00000100028	ENSG00000099942	ENSG00000100129
								ENSG00000099968	ENSG00000100029	ENSG00000099949	ENSG00000100138
								ENSG00000099974	ENSG00000100030	ENSG00000099953	ENSG00000100139
								ENSG00000099977	ENSG00000100031	ENSG00000099954	ENSG00000100147
								ENSG00000099991	ENSG00000100034	ENSG00000099956	ENSG00000100150
								ENSG00000099992	ENSG00000100036	ENSG00000099958	ENSG00000100151
								ENSG00000099994	ENSG00000100038	ENSG00000099960	ENSG00000100154
								ENSG00000099995	ENSG00000100056	ENSG00000099968	ENSG00000100162
								ENSG00000099999	ENSG00000100058	ENSG00000099974	ENSG00000100167
								ENSG00000100003	ENSG00000100060	ENSG00000099977	ENSG00000100196
								ENSG00000100014	ENSG00000100065	ENSG00000099991	ENSG00000100197
								ENSG00000100023	ENSG00000100068	ENSG00000099992	ENSG00000100201
								ENSG00000100027	ENSG00000100075	ENSG00000099994	ENSG00000100206
								ENSG00000100028	ENSG00000100077	ENSG00000099995	ENSG00000100207
								ENSG00000100029	ENSG00000100078	ENSG00000099999	ENSG00000100209
								ENSG00000100030	ENSG00000100083	ENSG00000100003	ENSG00000100211
								ENSG00000100031	ENSG00000100084	ENSG00000100014	ENSG00000100216
								ENSG00000100034	ENSG00000100092	ENSG00000100023	ENSG00000100218
								ENSG00000100036	ENSG00000100095	ENSG00000100027	ENSG00000100219
								ENSG00000100038	ENSG00000100097	ENSG00000100028	ENSG00000100220
								ENSG00000100053	ENSG00000100099	ENSG00000100029	ENSG00000100221
								ENSG00000100056	ENSG00000100100	ENSG00000100030	ENSG00000100225
								ENSG00000100058	ENSG00000100104	ENSG00000100031	ENSG00000100226
								ENSG00000100060	ENSG00000100105	ENSG00000100034	ENSG00000100227
								ENSG00000100065	ENSG00000100106	ENSG00000100036	ENSG00000100228
								ENSG00000100068	ENSG00000100109	ENSG00000100038	ENSG00000100234
								ENSG00000100075	ENSG00000100116	ENSG00000100053	ENSG00000100239
								ENSG00000100077	ENSG00000100124	ENSG00000100056	ENSG00000100241
								ENSG00000100078	ENSG00000100129	ENSG00000100058	ENSG00000100242
								ENSG00000100083	ENSG00000100138	ENSG00000100060	ENSG00000100243
								ENSG00000100084	ENSG00000100139	ENSG00000100068	ENSG00000100246
								ENSG00000100092	ENSG00000100147	ENSG00000100075	ENSG00000100258
								ENSG00000100095	ENSG00000100150	ENSG00000100077	ENSG00000100263
								ENSG00000100097	ENSG00000100151	ENSG00000100083	ENSG00000100266
								ENSG00000100099	ENSG00000100154	ENSG00000100084	ENSG00000100271
								ENSG00000100100	ENSG00000100162	ENSG00000100095	ENSG00000100280
[truncated: 22,822 more rows]
