# Supplementary material for: Identification of FMR1-regulated molecular networks in human neurodevelopment
Source: HighWire-hosted journal article supplement (doi:10.1101/gr.251405.119), 2020-03-01
Supplement: Supplemental_Table_S3.xlsx [file Supplemental_Table_S3.xlsx]

## Sheet: S3A. Summary-Clusters
Supplmentary Table S3A. Summary: Gene counts of hits and indirect genes per clusters
Cluster ID	Observed patterns	dNPC				dNeuron				vNPC				vNeuron
		Cluster all	CLIP-hits	RNA-hits	indirect	Cluster all	CLIP-hits	RNA-hits	indirect	Cluster all	CLIP-hits	RNA-hits	indirect	Cluster all	CLIP-hits	RNA-hits	indirect
Cluster01	neuron-common	279	0	6	273	12	0	0	12	85	0	4	81	33	4	0	29
Cluster02	neuron-common	14	3	7	4	24	2	0	22	44	0	3	41	32	8	2	22
Cluster03	individual	16	7	1	8	11	5	0	6	16	6	3	8	14	0	1	13
Cluster04	NPC-common, neuron-common	44	31	4	9	39	12	0	27	27	20	1	7	33	0	0	33
Cluster05	individual	19	14	2	4	23	8	0	15	13	10	0	3	35	2	0	33
Cluster06	common	10	7	0	3	17	8	0	9	22	22	2	0	27	8	1	18
Cluster07	common	31	15	8	8	8	4	0	4	31	18	6	8	8	3	0	5
Cluster08	NPC-common	31	18	2	11	29	9	0	20	32	19	2	11	39	12	0	27
Cluster09	common	23	13	6	4	18	6	0	12	22	14	2	6	18	6	0	12
Cluster10	common	16	10	1	5	15	4	0	11	10	8	0	2	14	5	0	9
Cluster11	dNPC-specific, neuron-common	18	17	2	0	8	4	0	4	6	3	3	0	11	5	0	6
Cluster12	neuron-common	22	8	9	5	16	5	0	11	9	1	5	3	20	5	1	14
Cluster13	vneuron-specific, dorsal-common	13	11	1	2	17	5	0	12	14	6	2	6	32	13	0	19
Cluster14	common	83	12	61	10	84	13	0	71	66	15	31	20	94	18	3	73
Cluster15	NPC-common, neuron-common	5	4	0	1	10	5	0	5	5	4	0	1	19	10	1	9
Cluster16	dNPC-specific	126	94	8	28	31	7	0	24	67	49	1	18	27	8	0	19
Cluster17	individual	32	30	2	2	28	6	0	22	25	13	4	8	13	4	0	9
Cluster18	common	61	20	2	39	47	5	0	42	59	19	1	39	77	15	0	62
Cluster19	common	50	22	4	24	46	12	0	34	47	23	2	22	42	15	0	27
Cluster20	NPC-common, neuron-common	30	23	4	5	21	9	0	12	36	28	1	7	28	15	0	13
Cluster21	common	20	9	0	11	17	3	0	14	17	7	0	10	17	4	1	13
Cluster22	individual	22	9	1	12	7	4	0	3	16	14	0	2	25	8	0	17
Cluster23	neuron-common	13	4	1	9	29	7	0	22	13	4	1	9	33	9	2	23
Cluster24	ventral-common	32	25	2	7	47	12	0	35	33	19	1	13	33	9	1	24
Cluster25	common	56	39	2	16	120	51	0	69	67	47	2	19	127	61	3	64
Cluster26	common	142	51	10	81	100	12	0	88	139	52	8	80	102	13	0	89
Cluster27	NPC-common, neuron-common	81	51	4	28	29	8	0	21	104	55	6	45	32	10	0	22
Cluster28	individual	25	19	4	2	42	15	0	27	8	5	1	2	11	0	3	8
Cluster29	neuron-common	18	11	1	6	38	19	0	19	9	6	0	3	31	15	1	16
Cluster30	neuron-common	12	11	2	1	20	10	0	10	12	3	1	8	20	8	1	11
Cluster31	common	38	21	4	14	25	9	0	16	20	17	1	2	23	8	0	15
Cluster32	neuron-common	34	7	8	19	47	13	4	30	29	24	0	5	49	15	0	34
Cluster33	NPC-common, neuron-common	20	8	5	7	20	5	0	15	21	17	0	4	27	8	0	19
Cluster34	neuron-common	47	9	7	31	88	31	0	57	43	29	0	14	79	29	3	47
Cluster35	common	41	12	4	25	54	11	0	43	46	14	1	31	54	12	0	42
Cluster36	common	32	14	3	16	37	8	0	29	21	11	1	10	35	10	1	25
Cluster37	dneuron-specific	39	16	3	20	6	3	0	3	38	20	2	16	29	5	1	23
Cluster38	NPC-common	27	18	3	8	46	0	0	46	28	19	2	8	35	12	1	22
Cluster39	NPC-common, dneuron-specific	13	8	2	4	173	0	0	173	19	13	6	3	13	5	1	7
Cluster40	common	7	2	5	0	30	0	0	30	28	1	11	16	24	0	0	24
Cluster41	NPC-common, neuron-common	12	8	1	3	24	0	0	24	17	11	2	5	22	0	0	22
Cluster42	individual	95	0	9	86	60	0	0	60	67	62	4	3	58	0	0	58
Cluster43	individual	12	0	0	12	30	1	0	29	21	9	1	11	164	0	1	163
Cluster44	individual	32	0	3	29	41	0	0	41	23	0	2	21	22	0	0	22
Cluster45	vNPC-specific, neuron-common	17	0	2	15	176	0	0	176	335	0	32	303	129	0	0	129

## Sheet: S3B. Summary-GOenrich
Supplmentary Table S3B. Summary: Top 5 ranked enriched GO biological processes and cellular components per clusters
ClusterID	dNPC		dNeuron		vNPC		vNeuron
	GO biological process	GO cellular component	GO biological process	GO cellular component	GO biological process	GO cellular component	GO biological process	GO cellular component
Cluster01	adenylate cyclase-modulating G-protein coupled receptor signaling pathway	F-actin capping protein complex	vascular endothelial growth factor receptor signaling pathway	semaphorin receptor complex	locomotion	plasma membrane	chemotaxis	semaphorin receptor complex
Cluster01	G-protein coupled receptor signaling pathway, coupled to cyclic nucleotide second messenger	heterotrimeric G-protein complex	vascular endothelial growth factor signaling pathway	extracellular region	axon guidance	focal adhesion	taxis	axon
Cluster01	G-protein coupled receptor signaling pathway	GABA-ergic synapse	blood vessel development	extracellular space	chemotaxis	cell cortex	axon guidance	integral component of plasma membrane
Cluster01	adenylate cyclase-inhibiting G-protein coupled receptor signaling pathway	Schaffer collateral - CA1 synapse	vasculature development	membrane	taxis	axon initial segment	locomotion	extracellular region
Cluster01	signaling	glutamatergic synapse	cellular response to vascular endothelial growth factor stimulus	glutamatergic synapse	neuron projection morphogenesis	early endosome	axonogenesis	extracellular space
Cluster01					neuron projection development		cell morphogenesis involved in neuron differentiation
Cluster02	mitochondrial electron transport, NADH to ubiquinone	mitochondrial respiratory chain complex I	microtubule-based movement	kinesin complex	nucleic acid metabolic process	nucleoplasm	microtubule-based movement	kinesin complex
Cluster02	ATP synthesis coupled electron transport	respirasome	microtubule-based process	microtubule	regulation of nucleobase-containing compound metabolic process	nucleus	microtubule-based process	microtubule
Cluster02	mitochondrial ATP synthesis coupled electron transport	mitochondrial inner membrane	cellular component movement	cytoskeleton	regulation of nitrogen compound metabolic process	mediator complex	cellular component movement	cytoskeleton
Cluster02	oxidative phosphorylation	mitochondrion	M phase	ciliary rootlet	nucleobase-containing compound metabolic process	histone methyltransferase complex	microtubule-based transport	spindle microtubule
Cluster02	respiratory electron transport chain	membrane	M phase of mitotic cell cycle	spindle	cellular macromolecule biosynthetic process	nuclear chromosome, telomeric region	cytoskeleton-dependent intracellular transport	spindle
Cluster02	electron transport chain
Cluster03	cortical actin cytoskeleton organization	cell-cell junction	protein dephosphorylation	cell projection	protein dephosphorylation	cytoplasm	actin filament-based process	lamellipodium
Cluster03	cortical cytoskeleton organization	cell junction	dephosphorylation	filopodium	dephosphorylation	basolateral plasma membrane	cytoskeleton organization	cytoplasm
Cluster03	protein dephosphorylation	membrane raft	regulation of cellular component organization	axon	cell part morphogenesis	cytosol	regulation of actin filament bundle assembly	cytoskeleton
Cluster03	dephosphorylation	apical plasma membrane	tissue morphogenesis	dendrite		perinuclear region of cytoplasm	actin cytoskeleton organization	cytosol
Cluster03	cell-cell signaling	endosome	regulation of peptidyl-tyrosine phosphorylation	perinuclear region of cytoplasm		axon	regulation of cell motility	early endosome
Cluster04	DNA repair	nucleoplasm	DNA repair	nucleoplasm	DNA repair	DNA replication factor C complex	cell cycle	cyclin-dependent protein kinase holoenzyme complex
Cluster04	response to DNA damage stimulus	nucleus	response to DNA damage stimulus	chromosome	DNA recombination	nucleoplasm	DNA repair	nucleoplasm
Cluster04	DNA metabolic process	nuclear chromosome, telomeric region	DNA metabolic process	chromosome, telomeric region	response to DNA damage stimulus	Ctf18 RFC-like complex	response to DNA damage stimulus	nucleus
Cluster04	DNA recombination	DNA replication factor C complex	cellular response to stress	nucleus	DNA metabolic process	nucleus	M phase of meiotic cell cycle	chromosome
Cluster04	cellular response to stress	Ctf18 RFC-like complex	regulation of DNA metabolic process	nuclear chromosome, telomeric region	cellular response to stress	nuclear replication fork	meiosis	condensed nuclear chromosome
Cluster04							DNA metabolic process
Cluster05	positive regulation of protein import into nucleus	basolateral plasma membrane	histone H3 acetylation	MOZ/MORF histone acetyltransferase complex	canonical Wnt receptor signaling pathway	Wnt signalosome	anatomical structure development	plasma membrane
Cluster05	positive regulation of transmembrane transport	basal plasma membrane	histone acetylation	AP-3 adaptor complex	cell morphogenesis	centrosome	developmental process	endosome
Cluster05	phosphate-containing compound metabolic process	receptor complex	internal peptidyl-lysine acetylation	HOPS complex	cellular component morphogenesis		multicellular organismal development	cell surface
Cluster05	phosphorus metabolic process	plasma membrane	internal protein amino acid acetylation	histone acetyltransferase complex	neuron differentiation		system development	membrane raft
Cluster05	positive regulation of nucleocytoplasmic transport	integral component of plasma membrane	peptidyl-lysine acetylation	late endosome membrane	protein modification by small protein conjugation or removal		multicellular organismal process	membrane
Cluster05	positive regulation of intracellular protein transport
Cluster06	synaptic vesicle exocytosis	synapse	neurotransmitter secretion	synapse	Golgi vesicle transport	AP-3 adaptor complex	mitochondrial ATP synthesis coupled proton transport	presynaptic active zone cytoplasmic component
Cluster06	synaptic vesicle transport	synaptic vesicle membrane	regulation of neurotransmitter levels	synaptic vesicle membrane	intracellular transport	HOPS complex	ATP synthesis coupled proton transport	synaptic vesicle membrane
Cluster06	establishment of localization in cell	presynaptic active zone cytoplasmic component	neurotransmitter transport	clathrin-sculpted gamma-aminobutyric acid transport vesicle membrane	establishment of localization in cell	synaptic vesicle membrane	energy coupled proton transport, down electrochemical gradient	cytoplasmic vesicle
Cluster06	neurotransmitter secretion	presynaptic active zone	generation of a signal involved in cell-cell signaling	presynaptic active zone cytoplasmic component	transport	late endosome membrane	cellular respiration	presynaptic active zone
Cluster06	regulation of neurotransmitter levels	cell junction	signal release	cell junction	vesicle-mediated transport	late endosome	ATP biosynthetic process	cell junction
Cluster06			establishment of localization in cell				purine ribonucleoside triphosphate biosynthetic process
Cluster07	mitochondrial ATP synthesis coupled proton transport	Golgi stack	Golgi vesicle transport	Golgi stack	mitochondrial ATP synthesis coupled proton transport	Golgi stack	Golgi vesicle transport	Golgi stack
Cluster07	ATP synthesis coupled proton transport	Golgi apparatus		Golgi membrane	ATP synthesis coupled proton transport	Golgi membrane		Golgi membrane
Cluster07	energy coupled proton transport, down electrochemical gradient	Golgi membrane		trans-Golgi network	energy coupled proton transport, down electrochemical gradient	Golgi apparatus		trans-Golgi network
Cluster07	hydrogen transport	cis-Golgi network		Golgi apparatus	hydrogen transport	cytosol		Golgi apparatus
Cluster07	proton transport	trans-Golgi network		cytoplasm	proton transport	cis-Golgi network		cytoplasm
Cluster07	ATP biosynthetic process				ATP biosynthetic process
Cluster07	purine ribonucleoside triphosphate biosynthetic process				purine ribonucleoside triphosphate biosynthetic process
Cluster08	protein catabolic process	SCF ubiquitin ligase complex	protein catabolic process	SCF ubiquitin ligase complex	protein catabolic process	SCF ubiquitin ligase complex	protein ubiquitination	SCF ubiquitin ligase complex
Cluster08	ubiquitin-dependent protein catabolic process	Cul7-RING ubiquitin ligase complex	protein modification by small protein conjugation or removal	cytosol	ubiquitin-dependent protein catabolic process	cytosol	protein modification by small protein conjugation	cytosol
Cluster08	modification-dependent protein catabolic process	cAMP-dependent protein kinase complex	protein ubiquitination	Cul4A-RING E3 ubiquitin ligase complex	modification-dependent protein catabolic process	Cul7-RING ubiquitin ligase complex	protein modification by small protein conjugation or removal	cullin-RING ubiquitin ligase complex
Cluster08	modification-dependent macromolecule catabolic process	cytosol	ubiquitin-dependent protein catabolic process	Cul4B-RING E3 ubiquitin ligase complex	modification-dependent macromolecule catabolic process	cAMP-dependent protein kinase complex	ubiquitin-dependent protein catabolic process	Cul4A-RING E3 ubiquitin ligase complex
Cluster08	proteolysis involved in cellular protein catabolic process	cullin-RING ubiquitin ligase complex	modification-dependent protein catabolic process	Cul7-RING ubiquitin ligase complex	proteolysis involved in cellular protein catabolic process	ciliary base	protein catabolic process	Cul4B-RING E3 ubiquitin ligase complex
Cluster08				Cul4-RING E3 ubiquitin ligase complex				Cul7-RING ubiquitin ligase complex
Cluster09	regulation of cellular amino acid metabolic process	proteasome complex	ubiquitin-dependent protein catabolic process	proteasome complex	ubiquitin-dependent protein catabolic process	proteasome complex	ubiquitin-dependent protein catabolic process	proteasome complex
Cluster09	DNA damage response, signal transduction by p53 class mediator resulting in cell cycle arrest	proteasome accessory complex	modification-dependent protein catabolic process	proteasome accessory complex	modification-dependent protein catabolic process	ficolin-1-rich granule lumen	modification-dependent protein catabolic process	proteasome accessory complex
Cluster09	signal transduction involved in G1/S transition checkpoint	proteasome regulatory particle, base subcomplex	modification-dependent macromolecule catabolic process	proteasome regulatory particle, base subcomplex	modification-dependent macromolecule catabolic process	proteasome accessory complex	modification-dependent macromolecule catabolic process	proteasome regulatory particle, base subcomplex
Cluster09	signal transduction involved in mitotic cell cycle G1/S checkpoint	proteasome core complex	regulation of cellular amino acid metabolic process	proteasome core complex	proteolysis involved in cellular protein catabolic process	secretory granule lumen	regulation of cellular amino acid metabolic process	proteasome core complex
Cluster09	signal transduction involved in mitotic cell cycle G1/S transition DNA damage checkpoint	AP-3 adaptor complex	proteolysis involved in cellular protein catabolic process	proteasome core complex, alpha-subunit complex	protein polyubiquitination	proteasome regulatory particle	proteolysis involved in cellular protein catabolic process	proteasome core complex, alpha-subunit complex
Cluster09	signal transduction involved in mitotic cell cycle checkpoint					proteasome regulatory particle, base subcomplex
Cluster09	protein polyubiquitination
Cluster09	signal transduction involved in DNA damage checkpoint
Cluster09	signal transduction involved in DNA integrity checkpoint
Cluster09	signal transduction involved in cell cycle checkpoint
Cluster09	regulation of cellular amine metabolic process
Cluster10	rRNA catabolic process	exosome (RNase complex)	rRNA metabolic process	cytoplasmic exosome (RNase complex)	protein export from nucleus	cytoplasmic exosome (RNase complex)	rRNA metabolic process	cytoplasmic exosome (RNase complex)
Cluster10	ncRNA catabolic process	nuclear exosome (RNase complex)	rRNA catabolic process	exosome (RNase complex)	nucleocytoplasmic transport	cytosol	rRNA catabolic process	exosome (RNase complex)
Cluster10	rRNA metabolic process	cytoplasmic exosome (RNase complex)	RNA catabolic process	nuclear exosome (RNase complex)	nuclear transport	cell	RNA catabolic process	nuclear exosome (RNase complex)
Cluster10	ncRNA metabolic process	nucleolus	ncRNA catabolic process	cytosol	rRNA processing	cytoplasm	ncRNA catabolic process	cytosol
Cluster10	exonucleolytic nuclear-transcribed mRNA catabolic process involved in deadenylation-dependent decay	cytoplasm	exonucleolytic nuclear-transcribed mRNA catabolic process involved in deadenylation-dependent decay	cytoplasm	nuclear export	nucleolus	exonucleolytic nuclear-transcribed mRNA catabolic process involved in deadenylation-dependent decay	cytoplasm
Cluster10	nuclear-transcribed mRNA catabolic process, exonucleolytic		nuclear-transcribed mRNA catabolic process, exonucleolytic				nuclear-transcribed mRNA catabolic process, exonucleolytic
Cluster11	localization	T-tubule		dendrite	ion transport	integral component of membrane		synapse
Cluster11	synapse organization	intercalated disc		integral component of membrane	cell development	plasma membrane		plasma membrane
Cluster11	synapse assembly	caveola						integral component of membrane
Cluster11	cellular localization	cell projection						dendrite
Cluster11	regulation of multicellular organismal process	membrane raft						membrane
Cluster12	respiratory electron transport chain	mitochondrial respirasome	axon guidance	axon initial segment	respiratory electron transport chain	mitochondrial inner membrane	axon guidance	axon initial segment
Cluster12	electron transport chain	basement membrane	axonogenesis	spectrin	electron transport chain	mitochondrial respirasome	axonogenesis	node of Ranvier
Cluster12	cellular respiration	mitochondrial inner membrane	cell morphogenesis involved in neuron differentiation	node of Ranvier	cellular respiration	mitochondrion	cell morphogenesis involved in neuron differentiation	spectrin
Cluster12	energy derivation by oxidation of organic compounds	mitochondrial respiratory chain complex III	neuron projection morphogenesis	spectrin-associated cytoskeleton	energy derivation by oxidation of organic compounds	mitochondrial respiratory chain complex III	neuron projection morphogenesis	spectrin-associated cytoskeleton
Cluster12	mitochondrial electron transport, ubiquinol to cytochrome c	integrin complex	chemotaxis	paranode region of axon	generation of precursor metabolites and energy	respirasome	chemotaxis	intercalated disc
Cluster12			taxis				taxis
Cluster13	chromosome segregation	condensin complex	chromosome segregation	condensin complex	endoplasmic reticulum organization	endoplasmic reticulum membrane	M phase	chromosome
Cluster13	mitosis	chromosome	mitotic chromosome condensation	cohesin complex	heart morphogenesis	endoplasmic reticulum	negative regulation of DNA-dependent DNA replication	chromosome, telomeric region
Cluster13	nuclear division	cohesin complex	cell division	chromosome		Golgi apparatus	cell cycle process	cohesin complex
Cluster13	M phase of mitotic cell cycle	chromatin	mitosis	mitotic spindle pole		microtubule organizing center	regulation of DNA metabolic process	mitotic spindle pole
Cluster13	organelle fission	chromosome, centromeric region	nuclear division	condensed chromosome		cytoplasm	regulation of DNA replication	nucleus
Cluster13	cell division		M phase of mitotic cell cycle
Cluster14	nuclear-transcribed mRNA catabolic process, nonsense-mediated decay	ribosome	translational initiation	ribosome	nuclear-transcribed mRNA catabolic process, nonsense-mediated decay	ribosome	translational initiation	ribosome
Cluster14	translational termination	cytosolic large ribosomal subunit	nuclear-transcribed mRNA catabolic process, nonsense-mediated decay	cytosolic small ribosomal subunit	nuclear-transcribed mRNA catabolic process	cytosolic large ribosomal subunit	nuclear-transcribed mRNA catabolic process, nonsense-mediated decay	cytosolic small ribosomal subunit
Cluster14	nuclear-transcribed mRNA catabolic process	cytosolic small ribosomal subunit	nuclear-transcribed mRNA catabolic process	cytosolic large ribosomal subunit	mRNA catabolic process	cytosolic small ribosomal subunit	nuclear-transcribed mRNA catabolic process	cytosolic large ribosomal subunit
Cluster14	mRNA catabolic process	intracellular	mRNA catabolic process	cytosol	RNA catabolic process	intracellular	mRNA catabolic process	intracellular
Cluster14	SRP-dependent cotranslational protein targeting to membrane	cytosol	RNA catabolic process	intracellular	SRP-dependent cotranslational protein targeting to membrane	cytosol	translation	cytosol
Cluster15	mitochondrial membrane organization	mitochondrial inner membrane			mitochondrial membrane organization	mitochondrial inner membrane
Cluster15	mitochondrion organization	mitochondrion			mitochondrion organization	mitochondrion
Cluster15	cellular membrane organization	integral component of membrane			cellular membrane organization	integral component of membrane
Cluster15	membrane organization				membrane organization
Cluster16	chromatin organization	nucleoplasm	chromosome organization	SWI/SNF complex	chromatin organization	SWI/SNF complex	chromatin disassembly	SWI/SNF complex
Cluster16	chromatin modification	nucleus	chromatin organization	nBAF complex	chromosome organization	nBAF complex	nucleosome disassembly	nBAF complex
Cluster16	chromosome organization	SWI/SNF complex	chromatin remodeling	npBAF complex	chromatin modification	nucleoplasm	protein-DNA complex disassembly	npBAF complex
Cluster16	regulation of transcription, DNA-dependent	nuclear chromatin	chromatin disassembly	nuclear chromatin	chromatin remodeling	npBAF complex	chromosome organization	nuclear chromatin
Cluster16	regulation of RNA biosynthetic process	histone acetyltransferase complex	nucleosome disassembly	nucleus	transcription, DNA-dependent	nucleus	chromatin organization	nucleoplasm
Cluster16			protein-DNA complex disassembly				chromatin remodeling
Cluster16			chromatin modification				chromatin modification
Cluster17	embryonic epithelial tube formation	perinuclear region of cytoplasm	vesicle localization	spindle microtubule	axon guidance	growth cone	exocytosis	catalytic complex
Cluster17	epithelial tube formation	Wnt signalosome	cytokinesis	spindle	neuron development	semaphorin receptor complex	secretion by cell	exocyst
Cluster17	regulation of signaling	beta-catenin destruction complex	vesicle transport along microtubule	Cul3-RING ubiquitin ligase complex	cell projection morphogenesis	axon	secretion	calcium channel complex
Cluster17	regulation of catabolic process	cell junction	microtubule-based transport	midbody	axonogenesis	neuronal cell body	vesicle-mediated transport	myelin sheath
Cluster17	positive regulation of cellular component organization	postsynaptic density	cytoskeleton-dependent intracellular transport	cytoskeleton	cell part morphogenesis	neuron projection	nerve growth factor receptor signaling pathway	Flemming body
Cluster18	mitotic prometaphase	nuclear pore	mitotic prometaphase	kinetochore	mitotic prometaphase	nuclear pore	mitotic prometaphase	kinetochore
Cluster18	glucose transport	host cell	mitosis	chromosome, centromeric region	glucose transport	host cell	mitosis	chromosome, centromeric region
Cluster18	hexose transport	kinetochore	nuclear division	condensed chromosome kinetochore	hexose transport	kinetochore	nuclear division	condensed chromosome kinetochore
Cluster18	monosaccharide transport	chromosome, centromeric region	M phase of mitotic cell cycle	chromosome	monosaccharide transport	chromosome, centromeric region	M phase of mitotic cell cycle	nuclear pore
Cluster18	carbohydrate transport	condensed chromosome kinetochore	organelle fission	spindle	carbohydrate transport	condensed chromosome kinetochore	organelle fission	host cell
Cluster18	regulation of glucose transport		M phase		regulation of glucose transport		M phase
Cluster19	vesicle coating	Golgi membrane	Golgi vesicle transport	Golgi membrane	Golgi vesicle transport	Golgi membrane	Golgi vesicle transport	Golgi membrane
Cluster19	membrane budding	ER to Golgi transport vesicle membrane	vesicle coating	ER to Golgi transport vesicle membrane	vesicle coating	ER to Golgi transport vesicle membrane	vesicle coating	membrane coat
Cluster19	Golgi vesicle transport	membrane coat	membrane budding	membrane coat	membrane budding	membrane coat	membrane budding	ER to Golgi transport vesicle membrane
Cluster19	vesicle-mediated transport	COPI vesicle coat	vesicle targeting, to, from or within Golgi	COPI vesicle coat	vesicle targeting, to, from or within Golgi	COPI vesicle coat	vesicle targeting, to, from or within Golgi	COPI vesicle coat
Cluster19	vesicle targeting, to, from or within Golgi	cytoplasmic vesicle	vesicle-mediated transport	cytoplasmic vesicle	vesicle-mediated transport	cytoplasmic vesicle	vesicle-mediated transport	cytoplasmic vesicle
Cluster20	anatomical structure morphogenesis	lamellipodium	regulation of small GTPase mediated signal transduction	cell projection	regulation of Rho protein signal transduction	lamellipodium	regulation of small GTPase mediated signal transduction	focal adhesion
Cluster20	developmental process	podosome	small GTPase mediated signal transduction	intracellular	anatomical structure morphogenesis	cell projection	small GTPase mediated signal transduction	costamere
Cluster20	multicellular organismal process	cell junction	actin cytoskeleton organization	actin filament	regulation of small GTPase mediated signal transduction	cell junction	regulation of signaling	cell projection
Cluster20	cell death	cell-cell adherens junction	regulation of Rho protein signal transduction	focal adhesion	neurogenesis	podosome	regulation of signal transduction	podosome
Cluster20	death	cell-cell junction	actin filament-based process	podosome	nervous system development	cleavage furrow	anatomical structure morphogenesis	cell junction
Cluster21	amino acid activation	aminoacyl-tRNA synthetase multienzyme complex	amino acid activation	aminoacyl-tRNA synthetase multienzyme complex	amino acid activation	aminoacyl-tRNA synthetase multienzyme complex	amino acid activation	aminoacyl-tRNA synthetase multienzyme complex
Cluster21	tRNA aminoacylation	cytoplasm	tRNA aminoacylation	cytoplasm	tRNA aminoacylation	cytoplasm	tRNA aminoacylation	cytoplasm
Cluster21	tRNA aminoacylation for protein translation	cytosol	tRNA aminoacylation for protein translation	cytosol	tRNA aminoacylation for protein translation	cytosol	tRNA aminoacylation for protein translation	cytosol
Cluster21	tRNA metabolic process	ribonucleoprotein complex	tRNA metabolic process	ribonucleoprotein complex	tRNA metabolic process	ribonucleoprotein complex	tRNA metabolic process	ribonucleoprotein complex
Cluster21	cellular amino acid metabolic process	mitochondrial matrix	cellular amino acid metabolic process	membrane	cellular amino acid metabolic process	membrane	cellular amino acid metabolic process	membrane
Cluster21	ncRNA metabolic process		ncRNA metabolic process		ncRNA metabolic process		ncRNA metabolic process
Cluster21	carboxylic acid metabolic process		carboxylic acid metabolic process		carboxylic acid metabolic process		carboxylic acid metabolic process
Cluster21	oxoacid metabolic process		oxoacid metabolic process		oxoacid metabolic process		oxoacid metabolic process
Cluster22	translational initiation	eukaryotic translation initiation factor 4F complex			Notch receptor processing	adherens junction	mitotic chromosome condensation	condensin complex
Cluster22	translation	eukaryotic 48S preinitiation complex			Notch signaling pathway	extracellular exosome	chromosome condensation	small-subunit processome
Cluster22	regulation of translational initiation	eukaryotic translation initiation factor 3 complex			nephron development	apical plasma membrane	mitotic sister chromatid segregation	condensed chromosome
Cluster22	regulation of translation	eukaryotic 43S preinitiation complex			protein modification by small protein conjugation or removal	plasma membrane	sister chromatid segregation	nucleolus
Cluster22	posttranscriptional regulation of gene expression	eukaryotic translation initiation factor 3 complex, eIF3m			cell fate commitment		DNA conformation change	endoplasmic reticulum membrane
Cluster23	nuclear-transcribed mRNA poly(A) tail shortening	CCR4-NOT complex	nuclear-transcribed mRNA poly(A) tail shortening	CCR4-NOT complex	nuclear-transcribed mRNA poly(A) tail shortening	CCR4-NOT complex	nuclear-transcribed mRNA poly(A) tail shortening	CCR4-NOT complex
Cluster23	nuclear-transcribed mRNA catabolic process, deadenylation-dependent decay	P-body	nuclear-transcribed mRNA catabolic process, deadenylation-dependent decay	P-body	nuclear-transcribed mRNA catabolic process, deadenylation-dependent decay	P-body	nuclear-transcribed mRNA catabolic process, deadenylation-dependent decay	P-body
Cluster23	mRNA 3'-end processing	cytosol	mRNA 3'-end processing	peroxisomal membrane	mRNA 3'-end processing	cytosol	mRNA 3'-end processing	endoplasmic reticulum membrane
Cluster23	RNA 3'-end processing	nucleus	RNA 3'-end processing	protein-DNA complex	RNA 3'-end processing	nucleus	RNA 3'-end processing	peroxisomal membrane
Cluster23	nuclear-transcribed mRNA catabolic process	cytoplasm	nuclear-transcribed mRNA catabolic process	RNA polymerase II transcription factor complex	nuclear-transcribed mRNA catabolic process	cytoplasm	nuclear-transcribed mRNA catabolic process	ficolin-1-rich granule lumen
Cluster24	cellular component morphogenesis	actin filament	cell projection organization	actin filament	actin filament-based process	actin filament	actin filament-based process	actin filament
Cluster24	axon guidance	cytoskeleton	axon guidance	filamentous actin	actin cytoskeleton organization	filamentous actin	actin cytoskeleton organization	filamentous actin
Cluster24	axonogenesis	M band	chemotaxis	myosin complex	actin filament-based movement	actin cytoskeleton	actin filament-based movement	myosin complex
Cluster24	cell projection morphogenesis	growth cone	taxis	unconventional myosin complex	actin filament organization	myosin complex	actin filament organization	ruffle
Cluster24	cell morphogenesis involved in differentiation	filamentous actin	actin filament-based process	growth cone	cytoskeleton organization	ruffle	cytoskeleton organization	brush border
Cluster24			axonogenesis
Cluster25	enzyme linked receptor protein signaling pathway	extrinsic component of cytoplasmic side of plasma membrane	regulation of response to stimulus	plasma membrane	enzyme linked receptor protein signaling pathway	plasma membrane	enzyme linked receptor protein signaling pathway	plasma membrane
Cluster25	transmembrane receptor protein tyrosine kinase signaling pathway	plasma membrane	transmembrane receptor protein tyrosine kinase signaling pathway	cytosol	transmembrane receptor protein tyrosine kinase signaling pathway	extrinsic component of cytoplasmic side of plasma membrane	transmembrane receptor protein tyrosine kinase signaling pathway	cytosol
Cluster25	peptidyl-tyrosine modification	focal adhesion	regulation of signal transduction	focal adhesion	cell surface receptor signaling pathway	glutamatergic synapse	regulation of signal transduction	focal adhesion
Cluster25	peptidyl-tyrosine phosphorylation	glutamatergic synapse	enzyme linked receptor protein signaling pathway	lamellipodium	peptidyl-tyrosine modification	focal adhesion	regulation of response to stimulus	glutamatergic synapse
Cluster25	cellular component movement	cytoplasm	regulation of signaling	cell-cell junction	peptidyl-tyrosine phosphorylation	receptor complex	cell surface receptor signaling pathway	lamellipodium
Cluster25	cell surface receptor signaling pathway				cellular component movement
Cluster26	RNA splicing, via transesterification reactions with bulged adenosine as nucleophile	spliceosomal complex	RNA splicing, via transesterification reactions with bulged adenosine as nucleophile	spliceosomal complex	RNA splicing, via transesterification reactions with bulged adenosine as nucleophile	spliceosomal complex	RNA splicing, via transesterification reactions with bulged adenosine as nucleophile	spliceosomal complex
Cluster26	nuclear mRNA splicing, via spliceosome	catalytic step 2 spliceosome	nuclear mRNA splicing, via spliceosome	catalytic step 2 spliceosome	nuclear mRNA splicing, via spliceosome	catalytic step 2 spliceosome	nuclear mRNA splicing, via spliceosome	catalytic step 2 spliceosome
Cluster26	RNA splicing, via transesterification reactions	nucleoplasm	RNA splicing, via transesterification reactions	nucleoplasm	RNA splicing, via transesterification reactions	nucleoplasm	RNA splicing, via transesterification reactions	nucleoplasm
Cluster26	RNA splicing	nucleus	RNA splicing	nucleus	RNA splicing	nucleus	RNA splicing	nucleus
Cluster26	mRNA processing	U2-type precatalytic spliceosome	mRNA processing	nuclear speck	mRNA processing	U2-type precatalytic spliceosome	mRNA processing	nuclear speck
Cluster26	RNA processing		RNA processing		RNA processing		RNA processing
Cluster27	microtubule-based process	microtubule	G2/M transition of mitotic cell cycle	centrosome	microtubule-based process	cytoskeleton	G2/M transition of mitotic cell cycle	centrosome
Cluster27	microtubule-based movement	cytoskeleton	interphase of mitotic cell cycle	microtubule organizing center	M phase	spindle	interphase of mitotic cell cycle	cytoskeleton
Cluster27	M phase	spindle	interphase	cytoskeleton	mitotic cell cycle	microtubule	interphase	microtubule organizing center
Cluster27	microtubule cytoskeleton organization	kinesin complex	mitotic cell cycle	microtubule	cell cycle phase	kinesin complex	mitotic cell cycle	microtubule
Cluster27	cell cycle phase	spindle microtubule	cell cycle phase	spindle	M phase of mitotic cell cycle	spindle microtubule	cell cycle phase	spindle
Cluster28	positive regulation of establishment of protein localization in plasma membrane	early endosome membrane	glucose transport	nuclear pore			mitochondrial electron transport, NADH to ubiquinone	mitochondrial respiratory chain complex I
Cluster28	regulation of establishment of protein localization in plasma membrane	membrane raft	hexose transport	host cell			ATP synthesis coupled electron transport	respirasome
Cluster28	positive regulation of glucose transport	endoplasmic reticulum	monosaccharide transport	nuclear envelope			mitochondrial ATP synthesis coupled electron transport	mitochondrial inner membrane
Cluster28	positive regulation of transporter activity	cell-cell junction	carbohydrate transport	nuclear membrane			oxidative phosphorylation	mitochondrion
Cluster28	regulation of sodium ion transport	endosome	regulation of glucose transport	nuclear periphery			respiratory electron transport chain	mitochondrial membrane
Cluster28			RNA transport				electron transport chain
Cluster28			establishment of RNA localization
Cluster28			nucleic acid transport
Cluster29	TOR signaling cascade	lysosome	intracellular signal transduction	cytosol	regulation of Rho GTPase activity		nerve growth factor receptor signaling pathway	cytosol
Cluster29	regulation of cellular protein metabolic process		nerve growth factor receptor signaling pathway	cytoplasm	inositol lipid-mediated signaling		cellular response to growth factor stimulus	cytoplasm
Cluster29	regulation of anatomical structure size		cellular response to growth factor stimulus	mitochondrion	phosphatidylinositol-mediated signaling		transmembrane receptor protein tyrosine kinase signaling pathway	Golgi apparatus
Cluster29	regulation of protein phosphorylation		signal transduction	mitochondrial outer membrane	regulation of Ras GTPase activity		enzyme linked receptor protein signaling pathway	lysosome
Cluster29	regulation of protein metabolic process		response to growth factor stimulus	lysosome	regulation of Rho protein signal transduction		response to growth factor stimulus	perinuclear region of cytoplasm
Cluster29					regulation of cellular component size
Cluster30	RNA splicing	spliceosomal complex	negative regulation of translation	ribonucleoprotein granule	DNA biosynthetic process	nucleoplasm	negative regulation of translation	ribonucleoprotein granule
Cluster30	mRNA metabolic process	catalytic step 2 spliceosome	cell death	polysome	nucleotide-excision repair, DNA gap filling	nucleus	determination of left/right symmetry	polysome
Cluster30	mRNA processing	nuclear speck	death	cytoplasm	positive regulation of cysteine-type endopeptidase activity	cytoplasm	determination of bilateral symmetry	axon
Cluster30	RNA splicing, via transesterification reactions with bulged adenosine as nucleophile	nucleus	apoptotic process	cytoplasmic ribonucleoprotein granule	positive regulation of cysteine-type endopeptidase activity involved in apoptotic process		specification of symmetry	postsynaptic density
Cluster30	nuclear mRNA splicing, via spliceosome	nucleoplasm	programmed cell death	postsynaptic density	positive regulation of endopeptidase activity		interspecies interaction between organisms	dendrite
Cluster30	RNA splicing, via transesterification reactions				cell redox homeostasis
Cluster31	intracellular receptor mediated signaling pathway	mediator complex	androgen receptor signaling pathway	mediator complex	intracellular steroid hormone receptor signaling pathway	mediator complex	androgen receptor signaling pathway	mediator complex
Cluster31	intracellular steroid hormone receptor signaling pathway	nucleoplasm	transcription initiation from RNA polymerase II promoter	nucleoplasm	androgen receptor signaling pathway	nucleoplasm	transcription initiation from RNA polymerase II promoter	nucleoplasm
Cluster31	androgen receptor signaling pathway	nucleus	DNA-dependent transcription, initiation	nucleus	intracellular receptor mediated signaling pathway	nucleus	DNA-dependent transcription, initiation	core mediator complex
Cluster31	transcription initiation from RNA polymerase II promoter	core mediator complex	intracellular steroid hormone receptor signaling pathway	core mediator complex	positive regulation of transcription, DNA-dependent	ubiquitin ligase complex	intracellular steroid hormone receptor signaling pathway	nucleus
Cluster31	DNA-dependent transcription, initiation	ubiquitin ligase complex	intracellular receptor mediated signaling pathway	ubiquitin ligase complex	transcription, DNA-dependent	nuclear chromatin	intracellular receptor mediated signaling pathway	ubiquitin ligase complex
Cluster32	cell cycle process	centrosome	chromatin organization	MLL1 complex	histone modification	MOZ/MORF histone acetyltransferase complex	chromatin organization	MLL1 complex
Cluster32	mitotic cell cycle	kinetochore	histone modification	nucleoplasm	covalent chromatin modification	nucleoplasm	chromatin modification	NuA4 histone acetyltransferase complex
Cluster32	cell cycle	cytoskeleton	covalent chromatin modification	histone methyltransferase complex	histone H3 acetylation	nucleus	chromosome organization	nucleoplasm
Cluster32	mitosis	spindle	chromatin modification	MLL3/4 complex	chromatin modification	PML body	histone modification	histone acetyltransferase complex
Cluster32	nuclear division	microtubule organizing center	chromosome organization	Set1C/COMPASS complex	chromatin organization	cytosol	covalent chromatin modification	MOZ/MORF histone acetyltransferase complex
Cluster32	M phase of mitotic cell cycle			NuA4 histone acetyltransferase complex
Cluster33	chromatin organization	nucleosome	transcription from RNA polymerase III promoter	RNA polymerase I complex	transcription, DNA-dependent	nucleus	transcription from RNA polymerase III promoter	nucleoplasm
Cluster33	chromosome organization	nucleus	DNA-dependent transcription, elongation	RNA polymerase III complex	RNA biosynthetic process	nucleolus	DNA-dependent transcription, initiation	RNA polymerase I complex
Cluster33	nucleic acid metabolic process	chromosome	transcription, DNA-dependent	transcription factor TFIIIC complex	cellular macromolecule biosynthetic process	nucleoplasm	transcription, DNA-dependent	RNA polymerase III complex
Cluster33	nucleobase-containing compound metabolic process	nuclear chromatin	RNA biosynthetic process	nucleoplasm	macromolecule biosynthetic process	ribonucleoprotein complex	RNA biosynthetic process	transcription factor TFIIIC complex
Cluster33	cellular macromolecule metabolic process	nuclear chromosome, telomeric region	DNA-dependent transcription, termination	nucleus	RNA metabolic process	chromosome	DNA-dependent transcription, elongation	nucleus
Cluster34	chromatin organization	nuclear chromatin	regulation of transcription, DNA-dependent	nucleoplasm	chromatin organization	histone deacetylase complex	regulation of transcription, DNA-dependent	nucleoplasm
Cluster34	regulation of transcription, DNA-dependent	nucleoplasm	regulation of RNA biosynthetic process	nucleus	chromosome organization	nucleoplasm	negative regulation of transcription, DNA-dependent	nuclear chromatin
Cluster34	regulation of RNA biosynthetic process	nucleus	regulation of RNA metabolic process	nuclear chromatin	chromatin modification	nucleus	regulation of RNA biosynthetic process	nucleus
Cluster34	chromosome organization	transcription factor complex	regulation of cellular macromolecule biosynthetic process	histone deacetylase complex	regulation of transcription, DNA-dependent	Sin3 complex	negative regulation of RNA metabolic process	histone deacetylase complex
Cluster34	regulation of RNA metabolic process	RNA polymerase II transcription factor complex	negative regulation of gene expression	transcriptional repressor complex	regulation of RNA biosynthetic process	nuclear chromatin	regulation of RNA metabolic process	transcription factor complex
Cluster35	G1/S transition of mitotic cell cycle	cyclin-dependent protein kinase holoenzyme complex	DNA replication	nuclear chromosome, telomeric region	S phase of mitotic cell cycle	cyclin-dependent protein kinase holoenzyme complex	DNA replication	nuclear chromosome, telomeric region
Cluster35	interphase of mitotic cell cycle	nuclear chromosome, telomeric region	DNA-dependent DNA replication	nucleoplasm	S phase	nuclear chromosome, telomeric region	DNA-dependent DNA replication	nucleoplasm
Cluster35	interphase	nucleoplasm	DNA strand elongation involved in DNA replication	nucleus	DNA replication	MCM complex	S phase of mitotic cell cycle	nucleus
Cluster35	S phase of mitotic cell cycle	nuclear origin of replication recognition complex	S phase of mitotic cell cycle	MCM complex	interphase of mitotic cell cycle	nucleoplasm	DNA metabolic process	MCM complex
Cluster35	regulation of cell cycle	MCM complex	S phase	nuclear origin of replication recognition complex	interphase	nuclear origin of replication recognition complex	S phase	nuclear origin of replication recognition complex
Cluster36	'de novo' posttranslational protein folding	chaperonin-containing T-complex	'de novo' posttranslational protein folding	chaperonin-containing T-complex	'de novo' posttranslational protein folding	chaperonin-containing T-complex	'de novo' posttranslational protein folding	chaperonin-containing T-complex
Cluster36	'de novo' protein folding	zona pellucida receptor complex	'de novo' protein folding	protein phosphatase type 2A complex	'de novo' protein folding	zona pellucida receptor complex	'de novo' protein folding	protein phosphatase type 2A complex
Cluster36	protein folding	microtubule	protein folding	zona pellucida receptor complex	protein folding	microtubule	protein folding	zona pellucida receptor complex
Cluster36	cellular protein metabolic process	cell body	cellular protein metabolic process	microtubule	cellular protein metabolic process	cell body	cellular protein metabolic process	microtubule
Cluster36	protein metabolic process	protein phosphatase type 2A complex	protein metabolic process	cell body	protein metabolic process	protein phosphatase type 2A complex	protein metabolic process	cell body
Cluster37	ribosome biogenesis	nucleolus	RNA processing	nucleolus	ribosome biogenesis	nucleolus	ribosome biogenesis	nucleolus
Cluster37	ribonucleoprotein complex biogenesis	nucleus		nucleus	ribonucleoprotein complex biogenesis	nucleus	ribonucleoprotein complex biogenesis	preribosome, large subunit precursor
Cluster37	cellular component biogenesis at cellular level	small-subunit processome			cellular component biogenesis at cellular level	preribosome, large subunit precursor	cellular component biogenesis at cellular level	nucleus
Cluster37	rRNA processing	preribosome, large subunit precursor			rRNA processing	small-subunit processome	rRNA processing	chromosome
Cluster37	rRNA metabolic process	preribosome, small subunit precursor			rRNA metabolic process	preribosome, small subunit precursor	rRNA metabolic process
Cluster38	positive regulation of muscle cell differentiation	lamellipodium	positive regulation of muscle cell differentiation	cell-cell junction	positive regulation of muscle cell differentiation	lamellipodium	cell-cell junction organization	cell-cell adherens junction
Cluster38	regulation of muscle cell differentiation	cell-cell adherens junction	biological adhesion	plasma membrane	regulation of muscle cell differentiation	cytosol	adherens junction organization	catenin complex
Cluster38	muscle cell differentiation	cytosol	cell adhesion	focal adhesion	small GTPase mediated signal transduction	cell projection	cell junction organization	cell-cell junction
Cluster38	muscle structure development	cell projection	cell-cell junction organization	fascia adherens	muscle cell differentiation	dendritic spine	positive regulation of muscle cell differentiation	adherens junction
Cluster38	small GTPase mediated signal transduction	ruffle membrane	cell junction organization	cell-cell adherens junction	regulation of small GTPase mediated signal transduction	plasma membrane	cell-cell adhesion	intercalated disc
Cluster38			regulation of cell differentiation
Cluster39	cell morphogenesis involved in differentiation		system development	collagen-containing extracellular matrix	cell morphogenesis involved in differentiation	axon	organ development	collagen-containing extracellular matrix
Cluster39	cell morphogenesis		multicellular organismal process	plasma membrane	nervous system development	postsynaptic density	system development	basement membrane
Cluster39	enzyme linked receptor protein signaling pathway		nervous system development	membrane	cell morphogenesis	perinuclear region of cytoplasm	anatomical structure morphogenesis	microfibril
Cluster39	axonogenesis		anatomical structure development	axon	enzyme linked receptor protein signaling pathway	neuronal cell body	cell-substrate adhesion	extracellular matrix
Cluster39	cellular component morphogenesis		multicellular organismal development	extracellular exosome	cellular component morphogenesis		anatomical structure development	extracellular region
Cluster40	translation	mitochondrial large ribosomal subunit	translational termination	ribosome	translation	ribosome	nuclear-transcribed mRNA catabolic process, nonsense-mediated decay	ribosome
Cluster40	cellular protein metabolic process	ribosome	viral genome expression	cytosolic large ribosomal subunit	translational termination	intracellular	translation	cytosolic large ribosomal subunit
Cluster40	protein metabolic process	large ribosomal subunit	viral transcription	intracellular	viral genome expression	cytosolic large ribosomal subunit	translational termination	intracellular
Cluster40	cellular macromolecule metabolic process	mitochondrial inner membrane	translational elongation	large ribosomal subunit	viral transcription	cytosolic small ribosomal subunit	viral genome expression	large ribosomal subunit
Cluster40	macromolecule metabolic process	mitochondrion	nuclear-transcribed mRNA catabolic process, nonsense-mediated decay	cytosolic small ribosomal subunit	nuclear-transcribed mRNA catabolic process, nonsense-mediated decay	large ribosomal subunit	viral transcription	cytosolic small ribosomal subunit
Cluster40			cellular protein complex disassembly		translational elongation		nuclear-transcribed mRNA catabolic process
Cluster40			protein complex disassembly		cellular protein complex disassembly		translational elongation
Cluster41		cytoplasm	mRNA processing	spliceosomal complex	regulation of type I interferon production	polysome	mRNA processing	spliceosomal complex
Cluster41		cytosol	RNA splicing	U2-type precatalytic spliceosome	regulation of interferon-beta production	ribonucleoprotein granule	RNA splicing	catalytic step 2 spliceosome
Cluster41			RNA processing	catalytic step 2 spliceosome	negative regulation of type I interferon production	cytosol	RNA processing	U2-type precatalytic spliceosome
Cluster41			mRNA metabolic process	nucleoplasm	negative regulation of translation	cytoplasmic stress granule	mRNA metabolic process	U4/U6 x U5 tri-snRNP complex
Cluster41			RNA splicing, via transesterification reactions with bulged adenosine as nucleophile	U4/U6 x U5 tri-snRNP complex	negative regulation of cytokine production	cytoplasmic ribonucleoprotein granule	RNA splicing, via transesterification reactions with bulged adenosine as nucleophile	nucleoplasm
Cluster41			nuclear mRNA splicing, via spliceosome				nuclear mRNA splicing, via spliceosome
Cluster42	axon guidance	plasma membrane	neurogenesis	cell-cell adherens junction	nervous system development	cell-cell junction	regulation of hydrolase activity	Golgi lumen
Cluster42	locomotion	actin filament	positive regulation of cellular component organization	plasma membrane	anatomical structure morphogenesis	intercalated disc	cell morphogenesis involved in neuron differentiation	collagen-containing extracellular matrix
Cluster42	cell morphogenesis involved in differentiation	cell cortex	positive regulation of molecular function	costamere	cell development	fascia adherens	multicellular organismal process	plasma membrane
Cluster42	chemotaxis	focal adhesion	multicellular organismal development	perinuclear region of cytoplasm	system development	adherens junction	neuron projection morphogenesis	lysosomal lumen
Cluster42	taxis	lamellipodium	cell development	cell-cell junction	neurogenesis	basement membrane	generation of neurons	heterotrimeric G-protein complex
Cluster42	neuron projection morphogenesis
Cluster43	nuclear-transcribed mRNA catabolic process, nonsense-mediated decay	cytoplasmic ribonucleoprotein granule	G-protein coupled receptor signaling pathway	heterotrimeric G-protein complex	translational initiation	eukaryotic translation initiation factor 4F complex	adenylate cyclase-modulating G-protein coupled receptor signaling pathway	membrane
Cluster43	nuclear-transcribed mRNA catabolic process		adenylate cyclase-modulating G-protein coupled receptor signaling pathway	plasma membrane	translation	eukaryotic 48S preinitiation complex	G-protein coupled receptor signaling pathway	plasma membrane
Cluster43	mRNA catabolic process		G-protein coupled receptor signaling pathway, coupled to cyclic nucleotide second messenger	integral component of plasma membrane	regulation of translational initiation	eukaryotic translation initiation factor 3 complex	adenylate cyclase-inhibiting G-protein coupled receptor signaling pathway	GABA-ergic synapse
Cluster43	RNA catabolic process		cell surface receptor signaling pathway	membrane raft	regulation of translation	eukaryotic 43S preinitiation complex	G-protein coupled receptor signaling pathway, coupled to cyclic nucleotide second messenger	integral component of plasma membrane
Cluster43			phospholipase C-activating G-protein coupled receptor signaling pathway	membrane	cellular macromolecule biosynthetic process	eukaryotic translation initiation factor 3 complex, eIF3m	cAMP biosynthetic process	dendrite
Cluster44	negative regulation of cell death	cytoplasm	DNA metabolic process	nucleoplasm	positive regulation of transcription, DNA-dependent	nucleoplasm	positive regulation of macromolecule metabolic process	transcription factor complex
Cluster44	mammary gland development	mitochondrion	regulation of macromolecule metabolic process	nucleus	positive regulation of RNA metabolic process	nuclear chromatin	positive regulation of cellular metabolic process	nucleus
Cluster44	cellular response to chemical stimulus	cytosol	regulation of gene expression, epigenetic	cyclin-dependent protein kinase holoenzyme complex	intracellular receptor mediated signaling pathway	RNA polymerase II transcription factor complex	negative regulation of transcription, DNA-dependent	nucleoplasm
Cluster44	negative regulation of cellular process	nucleus	regulation of cell cycle	chromosome	positive regulation of gene expression	nucleus	negative regulation of RNA metabolic process	nuclear body
Cluster44	response to chemical stimulus	transcription factor complex	regulation of metabolic process	transcription factor complex	positive regulation of macromolecule metabolic process	protein-containing complex	positive regulation of metabolic process
Cluster45	DNA repair	nucleoplasm	respiratory electron transport chain	nucleolus	adenylate cyclase-modulating G-protein coupled receptor signaling pathway	nucleosome	protein monoubiquitination	nucleus
Cluster45	response to DNA damage stimulus	Fanconi anaemia nuclear complex	electron transport chain	mitochondrial respiratory chain complex I	G-protein coupled receptor signaling pathway	mitochondrial respiratory chain complex I	DNA metabolic process	nucleoplasm
Cluster45	DNA metabolic process	nucleus	cellular respiration	respirasome	adenylate cyclase-inhibiting G-protein coupled receptor signaling pathway	condensin complex	histone monoubiquitination	nucleosome
Cluster45	cellular response to stress		energy derivation by oxidation of organic compounds	nucleus	G-protein coupled receptor signaling pathway, coupled to cyclic nucleotide second messenger	respirasome	response to DNA damage stimulus	microtubule organizing center
Cluster45	cell cycle phase		mitochondrial electron transport, NADH to ubiquinone	preribosome, small subunit precursor	elevation of cytosolic calcium ion concentration involved in phospholipase C-activating G-protein coupled signaling pathway	heterotrimeric G-protein complex	protein modification by small protein conjugation or removal	nucleolus

## Sheet: S3C. Summary-disease
Supplmentary Table S3C. Summary: Top 5 ranked enriched diseases per clusters
CluserID	dNPC	dneuron	vNPC	vneuron
Cluster01		Retinal ischemia	Tumor Angiogenesis	Avascular retina
Cluster01		Avascular retina	Mammary Neoplasms	Retinal ischemia
Cluster01		Truncus Arteriosus, Persistent	Neurilemmoma	tumor vasculature
Cluster01		Metastatic Renal Cell Cancer	Glioblastoma Multiforme	Tumor Angiogenesis
Cluster01		Retinopathy of Prematurity	Glioma	Hot flushes
Cluster02	Acute necrotizing encephalopathy	Spastic paraplegia 10, autosomal dominant	Fanconi Anemia	Spastic paraplegia 10, autosomal dominant
Cluster02	Abnormal mitochondria in muscle tissue	Spastic Paraplegia, Hereditary	Radial aplasia/hypoplasia	Spastic Paraplegia, Hereditary
Cluster02	Progressive macrocephaly	Henoch-Schoenlein Purpura	FANCONI ANEMIA, COMPLEMENTATION GROUP A (disorder)	Henoch-Schoenlein Purpura
Cluster02	NADH:Q(1) Oxidoreductase deficiency	Stalking (behavior)	Carcinogenesis
Cluster02	Cerebral Edema		Chromosome Breakage
Cluster03	Early-Onset Glaucoma	Peripheral Neuropathy	Early-Onset Glaucoma	Neurofibromatosis 2
Cluster03	Congenital Structural Myopathy	X-linked centronuclear myopathy	Congenital Structural Myopathy	Neuroblastoma
Cluster03	X-linked centronuclear myopathy	Distal sensory impairment	X-linked centronuclear myopathy	Sensorineural Hearing Loss (disorder)
Cluster03	Centronuclear myopathy	Neuropathy	Centronuclear myopathy	Osteosarcoma
Cluster03	Inherited neuropathies	Skin Erosion	Inherited neuropathies	Tumor Progression
Cluster04	Fanconi Anemia	FANCONI ANEMIA, COMPLEMENTATION GROUP A (disorder)	Malignant neoplasm of urinary bladder	Epithelial ovarian cancer
Cluster04	FANCONI ANEMIA, COMPLEMENTATION GROUP A (disorder)	Fanconi Anemia	Fanconi Anemia	Malignant neoplasm of ovary
Cluster04	Malignant neoplasm of urinary bladder	Chromosome Breakage	FANCONI ANEMIA, COMPLEMENTATION GROUP A (disorder)	Chromosome Breakage
Cluster04	DNA Damage	Increased chromosomal breakage	DNA Damage	Ovarian Carcinoma
Cluster04	Chromosome Breakage	Almond-shaped eyes	Hematologic Neoplasms	FANCONI ANEMIA, COMPLEMENTATION GROUP A (disorder)
Cluster05	gallbladder neoplasm		Cystadenoma	Adult Rickets
Cluster05	Neurilemmoma		Intestinal Neoplasms	Osteomalacia
Cluster05	Colorectal cancer metastatic		Adenomatous Polyposis Coli	Atherosclerosis
Cluster05	Gastrinoma		Microsatellite Instability	Malignant neoplasm of pancreas
Cluster05	Inflammatory Breast Carcinoma		Polycythemia	Prominent eyes
Cluster05				Prominent globes
Cluster05				Protruding eyes
Cluster06	Abnormality of retinal pigmentation	Abnormality of retinal pigmentation	Ulnar deviation of the fingers	Abnormal visual evoked potential
Cluster06	Retinal pigment epithelial abnormality	Retinal pigment epithelial abnormality	Arthrogryposis	Absent reflex
Cluster06	Muscle Spasticity		Broad cranium shape	Absent tendon reflex
Cluster06	Short stature		Wide skull shape	Reflex, Deep Tendon, Absent
Cluster06	Dull intelligence		Brachycephaly	Polyneuropathy
Cluster06	Low intelligence		Joint stiffness	Joint stiffness
Cluster06	Poor school performance			Flexion contractures of joints
Cluster06	Mental deficiency
Cluster07	Absent reflex	Microcephaly	Absent reflex	Microcephaly
Cluster07	Absent tendon reflex		Absent tendon reflex
Cluster07	Reflex, Deep Tendon, Absent		Reflex, Deep Tendon, Absent
Cluster07	Encephalopathies		Encephalopathies
Cluster07			Microcephaly
Cluster08	Hepatocarcinogenesis	Hepatoblastoma		Aplasia Cutis Congenita
Cluster08		Corneal fibrosis		Corneal fibrosis
Cluster08		Cystadenofibroma		Cystadenofibroma
Cluster08		Intraepithelial Neoplasia		Retinoblastoma
Cluster08		Hepatocarcinogenesis		Agenesis of corpus callosum
Cluster08		Aplasia Cutis Congenita		Fibromyxosarcoma
Cluster09			Bronchogenic Carcinoma
Cluster09			Motor neuron atrophy
Cluster09			Vesicular Stomatitis
Cluster10		Failure to gain weight
Cluster10		Pediatric failure to thrive
Cluster11	Post-Traumatic Stress Disorder	Autistic Disorder	Bipolar Disorder	Autistic Disorder
Cluster11		Seizures
Cluster12		Convulsions in the newborn		Convulsions in the newborn
Cluster12		Disturbance of consciousness		Tobacco Use Disorder
Cluster12		Dysesthesia		Disturbance of consciousness
Cluster12		Focal Clonic Seizures		Dysesthesia
Cluster12		Tobacco Use Disorder		Focal Clonic Seizures
Cluster12		Familial benign neonatal epilepsy		Familial benign neonatal epilepsy
Cluster13	Cornelia De Lange Syndrome	Hereditary Autosomal Dominant Spastic Paraplegia	Hereditary Autosomal Dominant Spastic Paraplegia	Cornelia De Lange Syndrome
Cluster13		Spastic Paraplegia, Hereditary	Spastic Paraplegia, Hereditary	Nijmegen Breakage Syndrome
Cluster13		Spastic Paraplegia	Spastic Paraplegia	Proximally placed thumbs
Cluster13		Henoch-Schoenlein Purpura	Muscle Spasticity	Abnormally low-pitched voice
Cluster13		Lip and Oral Cavity Carcinoma	Henoch-Schoenlein Purpura	Curly eyelashes
Cluster13				Hypoplasia of nipple
Cluster14	Anemia, Diamond-Blackfan	Anemia, Diamond-Blackfan	Anemia, Diamond-Blackfan	genital abnormal
Cluster14	genital abnormal	genital abnormal	genital abnormal	reproductive system abnormality
Cluster14	reproductive system abnormality	reproductive system abnormality	reproductive system abnormality	Anemia, Diamond-Blackfan
Cluster14	Anemia, Macrocytic	Anemia, Macrocytic	Anemia, Macrocytic	Anemia, Macrocytic
Cluster14	Abnormality of the urinary system	Abnormality of the urinary system	Abnormality of the urinary system	Abnormality of the urinary system
Cluster14	Hand deformities	Hand deformities	Hand deformities	Hand deformities
Cluster15	Parkinsonian Disorders		Parkinsonian Disorders
Cluster15	Schizophrenia		Schizophrenia
Cluster15	Amyloidosis		Amyloidosis
Cluster15	Degenerative polyarthritis		Degenerative polyarthritis
Cluster15	Seizures		Seizures
Cluster16	Intellectual Disability	Patella aplasia-hypoplasia	Macrostomia	Full lower lip
Cluster16	Bushy eyebrows	Full lower lip	Intellectual Disability	Prominent lower lip
Cluster16	Adenoid Cystic Carcinoma	Prominent lower lip	Dull intelligence	Macrostomia
Cluster16	Cryptorchidism	Macrostomia	Low intelligence	Patella aplasia-hypoplasia
Cluster16	Long eyelashes	Abnormality of cardiovascular system morphology	Poor school performance	Abnormality of cardiovascular system morphology
Cluster16		Coffin-Siris syndrome	Mental deficiency	Coffin-Siris syndrome
Cluster16		Slow-growing hair	Long eyelashes	Slow-growing hair
Cluster17	Odontogenic Tumors	congenital cerebellar ataxia	X-Linked Lissencephaly	Congenital long QT syndrome
Cluster17	Abnormality of the abdominal wall	Adult onset autosomal dominant leukodystrophy	Alzheimer's Disease	congenital cerebellar ataxia
Cluster17	Multiple, subcutaneous nodules	Pertussis	Schizophrenia	Adult onset autosomal dominant leukodystrophy
Cluster17	Subcutaneous nodule	Glycogen Storage Disease Type VII	Tauopathies	Pertussis
Cluster17	Peutz-Jeghers Syndrome	Idiopathic scoliosis	Neurodegenerative Disorders	Glycogen Storage Disease Type VII
Cluster17	fibroma	MASA SYNDROME (disorder)		Idiopathic scoliosis
Cluster17		Quebec platelet disorder		MASA SYNDROME (disorder)
Cluster17		Multiple Epiphyseal Dysplasia		Quebec platelet disorder
Cluster17		Arthritis, Reactive		Multiple Epiphyseal Dysplasia
Cluster18	Steroid resistant nephrotic syndrome of childhood	MOSAIC VARIEGATED ANEUPLOIDY SYNDROME	Steroid resistant nephrotic syndrome of childhood	MOSAIC VARIEGATED ANEUPLOIDY SYNDROME
Cluster18	Steroid-resistant nephrotic syndrome	Increased nuchal translucency	Steroid-resistant nephrotic syndrome	NEPHROTIC SYNDROME, STEROID-RESISTANT, AUTOSOMAL RECESSIVE
Cluster18		Ascites		Increased nuchal translucency
Cluster18		Dandy-Walker Syndrome		Steroid resistant nephrotic syndrome of childhood
Cluster18		Abnormality of vision		Steroid-resistant nephrotic syndrome
Cluster18				Ascites
Cluster19	Pityriasis Rosea	Pityriasis Rosea	Pityriasis Rosea	Pityriasis Rosea
Cluster19	Alveolar echinococcosis	Alveolar echinococcosis	Alveolar echinococcosis	Alveolar echinococcosis
Cluster19	Hemochromatosis	Arthrofibrosis	Arthrofibrosis	Arthrofibrosis
Cluster19	HEMOCHROMATOSIS, TYPE 1	Seropositive rheumatoid arthritis	Seropositive rheumatoid arthritis	Seropositive rheumatoid arthritis
Cluster19	Arthrofibrosis	Oligoarticular Arthritis	Oligoarticular Arthritis	Oligoarticular Arthritis
Cluster19	Seropositive rheumatoid arthritis	Tumor Virus Infections	Tumor Virus Infections	Tumor Virus Infections
Cluster19		Hemoglobinuria, Paroxysmal	Hemoglobinuria, Paroxysmal	Hemoglobinuria, Paroxysmal
Cluster20	Prostate carcinoma		Breast cancer, lobular	Myofibrillar Myopathy
Cluster20	Breast cancer, lobular		Secondary malignant neoplasm of pancreas
Cluster20	POLYCYSTIC KIDNEY DISEASE 1		oligodendroglioma
Cluster20	Secondary malignant neoplasm of pancreas		Adenocarcinoma of lung (disorder)
Cluster20	Malignant neoplasm of prostate		Metastasis from malignant tumor of prostate
Cluster21	Tauopathies	Distal sensory impairment	Distal sensory impairment	Distal sensory impairment
Cluster21	Distal sensory impairment	Progressive disorder	Progressive disorder	Progressive disorder
Cluster21	Progressive disorder	Autosomal recessive predisposition	Autosomal recessive predisposition	Autosomal recessive predisposition
Cluster21	Hypoplasia of corpus callosum	Hypoplasia of corpus callosum	Hypoplasia of corpus callosum	Hypoplasia of corpus callosum
Cluster21	Rhabdomyosarcoma, Embryonal	Rhabdomyosarcoma, Embryonal	Rhabdomyosarcoma, Embryonal	Rhabdomyosarcoma, Embryonal
Cluster22			Alagille Syndrome	Hereditary Autosomal Dominant Spastic Paraplegia
Cluster22			Long narrow head	Spastic Paraplegia, Hereditary
Cluster22			Narrow cranium shape	Spastic Paraplegia
Cluster22			Narrow head shape	Henoch-Schoenlein Purpura
Cluster22			Narrow skull shape	Differentiated Thyroid Gland Carcinoma
Cluster22			Turridolichocephaly
Cluster22			AICARDI-GOUTIERES SYNDROME 1
Cluster22			Hernia, Inguinal
Cluster22			Rhabdomyosarcoma
Cluster23		Non-alcoholic Fatty Liver Disease		Non-alcoholic Fatty Liver Disease
Cluster23				Liver carcinoma
Cluster23				Weight Gain Adverse Event
Cluster24	Cortical Dysplasia		Nonsyndromic Deafness	Primary Focal Segmental Glomerulosclerosis
Cluster24	Nerve Sheath Tumors		Hearing loss, progressive sensorineural	Adenovirus Infections
Cluster24	Congenital Hyperinsulinism		Cardiomyopathy, Dilated	Hearing loss, progressive sensorineural
Cluster24	neurofibroma			Nonsyndromic Deafness
Cluster24	Central neuroblastoma			Focal glomerulosclerosis
Cluster25	Juvenile Myelomonocytic Leukemia	Neoplasm Metastasis	Turner Syndrome, Male	Glioblastoma
Cluster25	Neoplasm Metastasis	Tumor Progression	Tumor Progression	Glioma
Cluster25	Tumor Progression	Glioma	Noonan Syndrome	Ewings sarcoma
Cluster25	Liver carcinoma	Astrocytoma	Neoplasm Metastasis	Juvenile Myelomonocytic Leukemia
Cluster25	Chronic myeloproliferative disorder	Mammary Neoplasms	Juvenile Myelomonocytic Leukemia	Neoplasm Metastasis
Cluster26	Autosomal dominant retinitis pigmentosa	Autosomal dominant retinitis pigmentosa	Autosomal dominant retinitis pigmentosa	Autosomal dominant retinitis pigmentosa
Cluster26	Conductive hearing loss	TARP syndrome	Conductive hearing loss	TARP syndrome
Cluster26	Static Tremor	Conductive hearing loss	TARP syndrome	Frontotemporal dementia
Cluster26	Night blindness, progressive	Frontotemporal dementia	Night blindness, progressive	Night blindness, progressive
Cluster26	Mixed Connective Tissue Disease	Night blindness, progressive	Mixed Connective Tissue Disease	Congenital anomaly of testis
Cluster27	Spastic paraplegia 10, autosomal dominant	Microcephaly	Microcephaly	Microcephaly
Cluster27	Spastic Paraplegia	Agyria	Spastic paraplegia 10, autosomal dominant	Agyria
Cluster27	Microcephaly	Lissencephaly	Classical Lissencephaly	Refractory anaemia with excess blasts
Cluster27	Congenital long QT syndrome	Congenital anomaly of brain	Agyria	Downward slant of palpebral fissure
Cluster27	congenital cerebellar ataxia	Pachygyria	Residual Cancer	Lissencephaly
Cluster27			Renal dysplasia and retinal aplasia (disorder)
Cluster28		NEPHROTIC SYNDROME, STEROID-RESISTANT, AUTOSOMAL RECESSIVE		Acute necrotizing encephalopathy
Cluster28		Steroid resistant nephrotic syndrome of childhood		Abnormal mitochondria in muscle tissue
Cluster28		Steroid-resistant nephrotic syndrome		Progressive macrocephaly
Cluster28		Hepatitis D Infection		NADH:Q(1) Oxidoreductase deficiency
Cluster28		Frontotemporal dementia		Cerebral Edema
Cluster29	Pheochromocytoma	Sarcoma	Pheochromocytoma	Congenital Abnormality
Cluster29	Carcinomatosis of peritoneal cavity	Muscular Atrophy	Malignant neoplasm of thyroid	Tuberculosis
Cluster29	Hamartoma	Adenocarcinoma of lung (disorder)	Triple Negative Breast Neoplasms	Tuberous Sclerosis
Cluster29	Dyskinetic syndrome	Malignant neoplasm of thyroid	Medulloblastoma	Sclerosis
Cluster29	Dementia, Vascular	Polycystic Kidney, Autosomal Dominant	Pancreatic Ductal Adenocarcinoma	TUBEROUS SCLEROSIS 2 (disorder)
Cluster29				Polycystic Kidney, Autosomal Dominant
Cluster29				Atrophic
Cluster30		AICARDI-GOUTIERES SYNDROME 1	Hematologic Neoplasms	Fragile X Syndrome
Cluster30		Fragile X Syndrome	Mesothelioma	Hepatitis D Infection
Cluster30		melanoma	Mesothelioma (malignant, clinical disorder) (disorder)	Dystonia
Cluster30		Abnormality of metabolism/homeostasis	Liver and Intrahepatic Biliary Tract Carcinoma	Muscle Rigidity
Cluster30			Squamous cell carcinoma of the head and neck	Liver carcinoma
Cluster31	Uterine Fibroids	Prominent fingertip pads	Endometrial Hyperplasia	Prominent fingertip pads
Cluster31	Coronary Restenosis	Narrow palate	Thyroid Hormone Resistance Syndrome	Narrow palate
Cluster31	Bone necrosis	Congenital malformation syndrome	Fibroid Tumor	Congenital malformation syndrome
Cluster31	Fibroid Tumor	Broad thumbs	Uterine Fibroids	Broad thumbs
Cluster31	Endometriosis	Single transverse palmar crease	Skin endocrine disorder	Single transverse palmar crease
Cluster32		Chondroblastoma	UV-Sensitive Syndrome	Chondroblastoma
Cluster32		CHARGE Syndrome	Malignant neoplasm of lung	Neurodevelopmental Disorders
Cluster32			Therapy-related myelodysplastic syndrome
Cluster32			Malignant neoplasm of prostate
Cluster32			Adenocarcinoma, Clear Cell
Cluster33		Cerebellar Dysmetria	Ataxia, Spinocerebellar	Coronary Restenosis
Cluster33		Dystonic disease		Cholestasis
Cluster33		Infratentorial atrophy		Osteoarthritis, Knee
Cluster33		Atrophy of cerebellum		Hepatopulmonary Syndrome
Cluster33		Cerebellar degeneration		ATRICHIA WITH PAPULAR LESIONS
Cluster34	Carcinogenesis	Carcinogenesis	Leukemia, Myelocytic, Acute	Carcinogenesis
Cluster34	Colorectal Carcinoma	Hepatocarcinogenesis	Malignant neoplasm of breast	Non-Small Cell Lung Carcinoma
Cluster34	Retinoblastoma	Non-Small Cell Lung Carcinoma	Familial primary pulmonary hypertension	Mammary Neoplasms
Cluster34	Anoxia	Leukemia, Myelocytic, Acute	Acute lymphocytic leukemia	Leukemia, Myelocytic, Acute
Cluster34	Mammary Neoplasms	leukemia	Carcinogenesis	leukemia
Cluster35	EAR, PATELLA, SHORT STATURE SYNDROME	EAR, PATELLA, SHORT STATURE SYNDROME	EAR, PATELLA, SHORT STATURE SYNDROME	Malignant neoplasm of urinary bladder
Cluster35	Malignant lymphoma, lymphocytic, intermediate differentiation, diffuse	Meningioma	Chronic Lymphocytic Leukemia	EAR, PATELLA, SHORT STATURE SYNDROME
Cluster35	Chronic Lymphocytic Leukemia	Birth length less than 3rd percentile	Malignant lymphoma, lymphocytic, intermediate differentiation, diffuse	Chronic Lymphocytic Leukemia
Cluster35	Cutaneous Melanoma	Graft-vs-Host Disease	Cutaneous Melanoma	Meningioma
Cluster35	Birth length less than 3rd percentile	Malignant neoplasm of urinary bladder	Meningioma	Cutaneous Melanoma
Cluster36		Pathological accumulation of air in tissues		Pathological accumulation of air in tissues
Cluster37	Hyperpigmentation		Hyperpigmentation
Cluster37	Rotting teeth		Rotting teeth
Cluster37			Hypodontia
Cluster38	Adams Oliver syndrome	Curly hair (finding)	Adams Oliver syndrome	Hereditary Diffuse Gastric Cancer
Cluster38		Diabetic Nephropathy		Cardiomyopathy, right ventricular
Cluster38		Kidney Failure		Arrhythmogenic Right Ventricular Dysplasia
Cluster38		Cardiomyopathies		Breast cancer, lobular
Cluster38		Colorectal Cancer		Subacute progressive viral hepatitis
Cluster39	Luminal A Breast Carcinoma	Dyskinetic syndrome	Cortical Dysplasia	Adolescent idiopathic scoliosis
Cluster39	Autistic Disorder	Movement Disorders	Decreased testosterone in males	Urinary Stress Incontinence
Cluster39		Personality Traits	Luminal A Breast Carcinoma	Marfan Syndrome
Cluster39		Eyebrow abnormalities	Autistic Disorder	Exfoliation Syndrome
Cluster39		Essential Tremor	Primary physiologic amenorrhea	Aortic Diseases
Cluster40	Hepatomegaly
Cluster41		Gastric Antral Vascular Ectasia	Fragile X Syndrome	Gastric Antral Vascular Ectasia
Cluster41		Degenerative disorder	Dysarthria	Degenerative disorder
Cluster41			Autistic Disorder
Cluster41			Pick Disease of the Brain
Cluster41			Post-Traumatic Stress Disorder
Cluster42	Plasma Cell Neoplasm	Tobacco Use Disorder	Agenesis of corpus callosum
Cluster42	Colorectal cancer metastatic	Mild Mental Retardation	Brain Neoplasms
Cluster42	Mesothelioma (malignant, clinical disorder) (disorder)	Polymyositis	Arrhythmogenic Right Ventricular Dysplasia
Cluster42	Pancreatic Neoplasm	Microphthalmos	Malocclusion
Cluster42	Colorectal Neoplasms	Deformity of limb	Exanthema
Cluster43		Substance Withdrawal Syndrome		Bipolar Disorder
Cluster43		Vasovagal syncope		Alcoholic Intoxication, Chronic
Cluster43		Cancer Pain		Chronic schizophrenia
Cluster43		Hyperaldosteronism		Movement Disorders
Cluster43		Skin endocrine disorder		Neuralgia
Cluster44	Malignant neoplasm of breast	Malignant lymphoma, lymphocytic, intermediate differentiation, diffuse	Retinoblastoma
Cluster44	Small cell carcinoma of lung	Malignant neoplasm of pancreas	Non-Small Cell Lung Carcinoma
Cluster44	Colon Carcinoma	Epithelial ovarian cancer	Fibroid Tumor
Cluster44	Stomach Carcinoma	Pancreatic carcinoma	Uterine Fibroids
Cluster44	Lung Neoplasms	Carcinogenesis	Mammary Neoplasms
Cluster45	Increased chromosomal breakage	Acute necrotizing encephalopathy	NADH:Q(1) Oxidoreductase deficiency
Cluster45	Chromosome Breakage	Abnormal mitochondria in muscle tissue	Alcoholic Intoxication, Chronic
Cluster45	Pyridoxine-responsive sideroblastic anemia	Progressive macrocephaly	Brain Edema
Cluster45	Almond-shaped eyes	Pallor of optic disc	Weight Gain Adverse Event
Cluster45	Radial aplasia/hypoplasia	NADH:Q(1) Oxidoreductase deficiency	Dyskinetic syndrome

## Sheet: S3D. Gene list
Supplmentary Table S3D. Full list of genes per Arboretum-hic clusters
Cluster ID	Cluster01
Cell types	dNPC	dNeuron	vNPC	vNeuron
Gene counts	279	12	85	33
	AATK	CNTN2	ACTN1	ARHGEF11
	ABCD1	FLT1	ADD2	CDK5
	ABCD3	GIPC1	ADRBK1	CDK5R1
	ABR	IGHG1	AKT2	CNTN2
	ADARB1	IGKC	ANK1	CRMP1
	ADCY1	NRP1	ANXA2	DPYSL2
	ADCY2	NRP2	ARHGEF7	DPYSL4
	ADCY4	PGF	ASAP1	DPYSL5
	ADCY5	PLXND1	BRAF	EML1
	ADCY7	SEMA3C	CASP3	FARP2
	ADCY8	VEGFA	CAV1	FES
	ADCY9	VEGFB	CD86	FLT1
	ADD1		CDH5	GIPC1
	ADD2		CFTR	IGHG1
	ADRB1		CNTN1	IGKC
	AEBP1		CREB1	KDR
	AES		DYSF	NRP1
	AFF4		EFNB3	NRP2
	AGAP2		EGF	PAK2
	AGTR1		GPC1	PGF
	AKAP8		GRB10	PLXNA2
	AMOTL1		IFT57	PLXNA3
	AMOTL2		IGF1	PLXNA4
	ANKRD28		ILK	PLXNB1
	APBA1		INPPL1	PLXND1
	ARAP1		ITGA6	RND1
	ARHGAP39		ITGAV	SEMA3A
	ARHGAP5		JAK3	SEMA3C
	ARHGEF25		KCNQ2	SEMA3E
	ARNT2		KDR	SEMA3F
	ARRB2		KIRREL	SEMA6A
	ARX		LIMK1	VEGFA
	ASAP3		LIMK2	VEGFB
	ATIC		LRIG1
	ATL1		MET
	ATMIN		MLLT4
	ATP1A3		MPP2
	ATXN10		MYOM2
	ATXN1L		NCK2
	AXL		NEDD9
	BBS2		NF2
	BIRC7		NFASC
	C7orf50		NGF
	CACYBP		NOS3
	CAP1		NPHS1
	CAPG		NRCAM
	CAPZA2		NRP1
	CASP6		NRP2
	CASP9		NUMB
	CD14		PAK2
	CDH6		PIK3CB
	CHPF		PIK3CG
	CHRM2		PIK3R2
	CIT		PIK3R3
	CNTN6		PPFIA2
	COG4		PRKCZ
	COL17A1		PSEN1
	COL18A1		PTPN1
	CRABP2		PTPN21
	CSPG5		RAC2
	CTNNBL1		RAF1
	CUL2		RALA
	CUL9		RET
	CYLD		RHOG
	DAB2IP		RHOU
	DACT1		RND1
	DAG1		RRAS
	DAZ1		SDC2
	DAZL		SDC3
	DCLK1		SEMA3F
	DCX		SH3KBP1
	DDX21		SHH
	DDX3X		SLC9A3R1
	DNAJA1		SOS2
	DNAJC5		SPHK1
	DNAJC6		SPTB
	DNER		SPTBN4
	DRD2		SPTBN5
	DRD3		TGFB1
	DSG2		THBS1
	DYRK1B		VAV1
	EDN1		VAV2
	EDNRA		WASL
	EDNRB		YWHAQ
	EEF1A2		YWHAZ
	ELN
	ENO1
	EPHB4
	EXOC3
	F2
	F2R
	F2RL1
	F2RL2
	F2RL3
	FARP2
	FBXO7
	FDFT1
	FGFR2
	FGFR3
	FIGF
	FKBP4
	FLOT2
	FLT1
	FOXP2
	FSCN1
	FZD2
	GAD2
	GANAB
	GAP43
	GAPDH
	GCSAM
	GIPC1
	GLG1
	GNA12
	GNA14
	GNA15
	GNAI2
	GNAO1
	GNG2
	GNG5
	GNL1
	GRIK3
	GRK5
	GTF2IRD1
	GTPBP1
	HAUS1
	HAUS6
	HCN4
	HIPK1
	HMGCR
	HMGCS1
	HSP90AB1
	HSPA5
	IFT57
	IFT88
	IGFBP2
	IGHG1
	IGKC
	IL17RD
	INSIG1
	IREB2
	ITGB5
	KCNH8
	KEAP1
	KLF12
	KLHL12
	KLHL7
	LGALS8
	LRRTM2
	LTBP3
	MAP2K3
	MAST4
	MFAP2
	MLF1
	MMS19
	MPP2
	MUT
	MYO1E
	MYOF
	MYT1
	NDUFAF2
	NELL2
	NFYB
	NFYC
	NLRP2
	NLRP3
	NRXN1
	NRXN2
	NRXN3
	NTRK2
	OPTN
	P2RY1
	PACS2
	PANK4
	PAX2
	PGF
	PHF1
	PKD1L2
	PKM
	PLAA
	PLCB1
	PLCB2
	PLK3
	POMC
	PPP1R14A
	PPP1R15A
	PPP1R15B
	PPP5C
	PPT2
	PRDM4
	PREB
	PRICKLE1
	PRKCE
	PRKCI
	PRX
	PTPRM
	PUM2
	PYGO1
	RALBP1
	RALGDS
	REEP1
	RFWD2
	RGMA
	RGS6
	RHOBTB2
	RNF123
	RNF31
	RNF40
	RP11-544M22.13
	RRP1B
	RTN1
	S1PR1
	S1PR3
	SAE1
	SAFB
	SCD
	SCN2A
	SDC4
	SEMA3C
	SEMA3E
	SEMA6A
	SH3RF1
	SHC3
	SIK2
	SKIV2L
	SLC26A9
	SLIT2
	SLX4
	SNCA
	SOX10
	SOX4
	SOX9
	SPATA13
	SQLE
	SRGAP1
	SSB
	STK36
	STMN2
	STRIP1
	SULF1
	SUPV3L1
	SYMPK
	SYNE3
	SYNM
	SYT4
	TACC3
	TBXA2R
	TCF19
	TEP1
	TGM2
	THBS4
	THRSP
	TLE1
	TOP1
	TOPORS
	TPX2
	TRAF3
	TRAP1
	TRAPPC2
	TSHZ3
	TTBK2
	TUBA1A
	TXNRD1
	UBE3C
	UBQLN1
	UNC45A
	USP22
	USP33
	VANGL2
	VEGFB
	WIZ
	WNK2
	WWP1
	WWTR1
	XBP1
	ZEB2
	ZER1
	ZMIZ1
	ZYX
Cluster ID	Cluster02
Cell types	dNPC	dNeuron	vNPC	vNeuron
Gene counts	14	24	44	32
	MACF1	ANAPC1	ASH2L	ARL3
	MT-ND1	ANAPC5	ATR	AURKA
	MT-ND4L	BICD2	ATXN1L	CDC16
	MT-ND5	CCNB1	BARD1	CLIP2
	NDUFA1	CKAP2	BRCA2	CUL3
	NDUFA4	ESPL1	CBX5	KIF11
	NDUFB2	KIF11	CCNA2	KIF15
	NDUFB3	KIF15	CDK8	KIF1B
	NDUFB9	KIF1B	DAXX	KIF20A
	NDUFS1	KIF20A	E2F1	KIF23
	NDUFS4	KIF23	EBF1	KIF25
	NDUFS5	KIF25	FANCD2	KIF3A
	NME4	KIF3C	H2AFX	KIF3B
	UTRN	KIF5A	H2AFZ	KIF3C
		KIF5B	HIST1H4B	KIF4A
		KIF5C	HIST1H4C	KIF5A
		KIFC3	KLF12	KIF5B
		KLC2	MED14	KIF5C
		PTTG1	MED15	KIFAP3
		RAB6A	MED17	KIFC3
		RACGAP1	MED20	KLC1
		STARD9	MED21	KLC2
		TACC3	MED4	KLHL11
		UBE2E1	MED6	KLHL21
			MRE11A	PARP4
			NCOA6	POLB
			NFYA	PRC1
			NFYB	RACGAP1
			NFYC	STARD9
			PAXIP1	TBL1X
			PPARGC1A	TBL1XR1
			RAD51	TPX2
			RAD9A
			RBBP5
			RNF2
			RNF8
			RUVBL1
			SAE1
			SRF
			TERF2
			UBE2I
			WDR5
			WDR82
			ZBTB16
Cluster ID	Cluster03
Cell types	dNPC	dNeuron	vNPC	vNeuron
Gene counts	16	11	16	14
	ABCA1	CD44	AGAP2	ACTG1
	BCR	DSP	CASK	AKT2
	CASK	IGF2BP1	CD44	DAG1
	DLG1	MTM1	DLG1	KBTBD2
	DLL1	MTMR2	EPB41L1	LIMK1
	EPB41L1	NF2	LGALS8	LIMK2
	EPB41L2	PSEN1	MTM1	MYH10
	GJA1	ROCK2	MTMR12	MYO1E
	JAG1	SACS	MTMR2	NF2
	KCNJ12	SBF1	PANK4	NISCH
	MAGI3	VIM	PKM	OPTN
	MTM1		ROCK2	ROCK1
	MTMR12		SACS	ROCK2
	MTMR2		SBF1	YAP1
	SBF1		SBF2
	SBF2		VCAN
Cluster ID	Cluster04
Cell types	dNPC	dNeuron	vNPC	vNeuron
Gene counts	44	39	27	33
	APEX1	ATM	ATM	APEX1
	ATM	ATMIN	BLM	ATR
	ATR	ATR	BRCA1	BCCIP
	BLM	BARD1	CHEK1	BLM
	BRCA1	BLM	IRF2BPL	BRCA2
	BRCA2	BRCA1	KDM5C	BRD4
	CHEK1	BRCA2	MDC1	CCNA2
	DNA2	CDK4	MSH3	CCND2
	FANCD2	CHEK1	MSH6	CCND3
	FANCI	FANCA	PCNA	CCNE2
	HLTF	FANCC	POLG	CCNY
	ILF2	FANCD2	PPP6R1	CDK12
	KDM5C	FANCG	PRKDC	CDK13
	MDC1	FANCI	RFC1	CDK14
	MRE11A	H2AFX	RFC2	CDK6
	MSH3	HERC2	RFC3	ESPL1
	MSH6	MDC1	RFC4	FANCA
	PALB2	MLH1	RFC5	FANCD2
	PCNA	MRE11A	RPA1	FANCG
	POLA1	MSH2	SMARCAL1	GMNN
	POLE	MSH3	TCF20	H2AFX
	POLG	MSH4	TIMELESS	HMGA1
	PPP6R1	MSH6	TOPBP1	IMMT
	PRKDC	PALB2	USP1	LIG3
	RAD51	RAD18	WDHD1	MCM3AP
	REV3L	RAD51	XRCC6	MDC1
	RFC1	RNF8	ZFHX3	MLH1
	RFC2	RPA1		MSH3
	RFC3	SMARCAD1		MSH4
	RFC4	TERF1		RAD51
	RFC5	TERF2		TICRR
	RPA1	TNKS		TOP3A
	SHPRH	TNKS2		TXN
	SMARCAL1	TOP3A
	TCF20	TP53BP1
	TIMELESS	UBE2T
	TNKS2	USP1
	TOP3A	WDR48
	TOPBP1	ZFHX3
	TXN
	WDHD1
	XRCC6
	ZBTB16
	ZFHX3
Cluster ID	Cluster05
Cell types	dNPC	dNeuron	vNPC	vNeuron
Gene counts	19	23	13	35
	DOCK7	BRD1	APC	ADRBK1
	EGF	BRPF1	ARRB2	AHNAK
	EGFR	BRPF3	CUL2	ANXA2
	EPB41	CCND2	FZD2	ARHGEF2
	ERBB2	CCND3	GSK3B	ARRB2
	ERBB4	DAZ1	HIF1A	ASAP1
	FRY	DAZL	LRP6	CD86
	GSTP1	EPC2	NIN	CNTN1
	IDE	FRY	RNF31	COL17A1
	IGF1R	ING5	USP33	DYSF
	INPPL1	KAT6A	VHL	FGF2
	IQSEC1	KAT6B	ZER1	FGFR1
	JUP	KIF1C	ZNF197	FIG4
	LRIG1	MEAF6		GJA1
	PTPRK	PLK2		ITGA6
	PTPRZ1	PTPN21		ITGB5
	RHO	PUM2		LRP2
	SOS2	RHO		MAP3K5
	TNS3	STAT5B		MAPK8IP3
		TNPO3		MLLT4
		VPS18		NEDD4
		VPS39		NEO1
		VPS41		NPHS1
				NTRK2
				PRKCZ
				PTPRD
				RP11-544M22.13
				SDC2
				SDC4
				SOS2
				STAT5B
				TGFB1
				THBS1
				TYRO3
				VAC14
Cluster ID	Cluster06
Cell types	dNPC	dNeuron	vNPC	vNeuron
Gene counts	10	17	22	27
	ARHGAP21	ARHGAP21	ADCY6	ARHGAP21
	BSN	BSN	ADD1	ATP5A1
	DMXL2	CCAR2	AKAP6	ATP5B
	DOC2A	DMXL2	BBS2	ATP5E
	ERC1	DNAJC5	BSN	ATP5G1
	RAB3GAP1	DOC2A	CACNA1H	ATP5H
	RAB3GAP2	ERC1	COG4	ATP5I
	RIMS1	GAD2	DMXL2	ATP5J2
	UNC13B	HSPA8	FBN2	BICD2
	VCP	RAB3GAP1	GOLGA3	BSN
		RAB3GAP2	KIF21B	C14orf2
		RIMS1	NCAPD2	CS
		STON2	PHKA2	DNM1L
		UNC13B	PHKB	DOC2A
		VCP	PLCB3	HTR2C
		WNK1	RAB3GAP1	MFN2
		ZC3H18	RAB3GAP2	MPDZ
			SKIV2L	MTM1
			UNC13B	OGDH
			VPS18	PLEKHA1
			VPS39	RAB3GAP1
			VPS41	RAB3GAP2
				RAB6A
				RIMS1
				UNC13B
				UQCRB
				USMG5
Cluster ID	Cluster07
Cell types	dNPC	dNeuron	vNPC	vNeuron
Gene counts	31	8	31	8
	ATP5A1	ENO1	ATP5A1	ENO1
	ATP5B	GBF1	ATP5B	GBF1
	ATP5E	GOLGA2	ATP5E	GOLGA2
	ATP5G1	OCRL	ATP5G1	OCRL
	ATP5H	RAD54L2	ATP5H	RAD54L2
	ATP5I	TRAPPC2	ATP5I	TRAPPC2
	ATP5J2	TRAPPC9	ATP5J2	TRAPPC9
	ATP6V0A1	USO1	ATP6V0A1	USO1
	BICD2		BICD2
	C14orf2		C14orf2
	DCTN1		DCTN1
	DDX1		DDX1
	DNM1L		DNM1L
	ETFA		ENO1
	GBF1		GBF1
	GOLGA2		GOLGA2
	GOLGB1		GOLGB1
	HSD17B4		HSD17B4
	KIF20A		MFN2
	MFN2		NEK9
	NEK9		OCRL
	OCRL		OXSM
	OXSM		RAB6A
	RAB6A		RABGAP1
	RABGAP1		RAD54L2
	RAD54L2		RELA
	RELA		RTCB
	RTCB		TRAPPC2
	TRAPPC9		TRAPPC9
	USMG5		USMG5
	USO1		USO1
Cluster ID	Cluster08
Cell types	dNPC	dNeuron	vNPC	vNeuron
Gene counts	31	29	32	39
	AKAP11	AMER1	AKAP11	AMER1
	AKAP12	APC	AKAP12	ANAPC1
	AMER1	AXIN1	AMER1	ANAPC5
	ARFGEF1	BTRC	ARFGEF1	BARD1
	AXIN1	CCND1	AXIN1	BTRC
	BCL9	CCNE1	BTRC	CCND1
	BTRC	CDKN1A	CUL1	CCNE1
	CKS1B	CDKN1B	CUL7	CDKN1A
	CUL1	CKS1B	DDB1	CDKN1B
	CUL4B	CUL1	DDX21	CKS1B
	CUL7	CUL4B	FBXL19	CUL1
	FBXL19	CUL7	FBXL4	CUL2
	FBXL4	DCAF13	FBXL5	CUL4B
	FBXL5	DDB1	FBXO18	CUL7
	FBXO18	FBXL19	FBXW11	DDB1
	FBXW11	FBXL4	JUN	FBXL19
	JUN	FBXL5	KDM2B	FBXL4
	KDM2B	FBXO7	KDM4A	FBXL5
	KDM4A	FBXW11	KEAP1	FBXO7
	KIF21A	IREB2	KIF21A	FBXW11
	NCL	KDM4A	NCL	IREB2
	NOTCH1	NOTCH1	NOTCH1	KDM4A
	PLEKHM2	RBL2	PLEKHM2	KLHL12
	PRKACB	RBX1	PPP1CA	KLHL7
	PRKAR2A	RNF31	PRKACB	KLHL9
	PRKAR2B	SKP1	PRKAR2A	NOTCH1
	RBX1	SKP2	PRKAR2B	PTTG1
	SKP1	TRPC4AP	RBX1	RBL2
	SKP2	USP47	SKP1	RBX1
	TRPC4AP		SKP2	RNF123
	USP47		USP47	RNF31
			WDTC1	SKP1
				SKP2
				TRPC4AP
				UBE2E1
				USP47
				VHL
				WDTC1
				ZER1
Cluster ID	Cluster09
Cell types	dNPC	dNeuron	vNPC	vNeuron
Gene counts	23	18	22	18
	AGL	DLL1	ACLY	DLL1
	EEF1B2	KIAA0368	EEF1A1	KIAA0368
	HBS1L	NSF	EEF1A2	NSF
	KIAA0368	POMP	EEF1B2	POMP
	NSF	PSMA2	EIF2AK4	PSMA2
	POMP	PSMA3	FLCN	PSMA3
	PSMA2	PSMA4	FNIP2	PSMA4
	PSMA3	PSMB5	GSPT1	PSMB5
	PSMA4	PSMC3	HBS1L	PSMC3
	PSMB5	PSMD1	KIAA0368	PSMD1
	PSMC3	PSMD2	PELO	PSMD2
	PSMD1	PSMD4	PSMA2	PSMD4
	PSMD2	PSMD6	PSMD1	PSMD6
	PSMD4	PSME4	PSMD2	PSME4
	PSMD6	RAD23A	PSMD4	RAD23A
	PSME4	UBE3C	PSMD6	UBE3C
	RAD23A	UBE4B	PSME4	UBE4B
	UBE4A	USP7	RAD23A	USP7
	UBE4B		UBE3C
	USP7		UBE4A
	VPS18		UBE4B
	VPS39		VCP
	VPS41
Cluster ID	Cluster10
Cell types	dNPC	dNeuron	vNPC	vNeuron
Gene counts	16	15	10	14
	ADAR	CHPF	CHPF	CHPF
	DIS3	DIS3	DIS3	DIS3
	DIS3L	DIS3L	EXOSC6	DIS3L
	EXOSC10	EDC4	GTPBP1	EDC4
	EXOSC6	EXOSC10	RAN	EXOSC10
	EXOSC8	EXOSC6	RANBP2	EXOSC6
	EXOSC9	EXOSC8	SKIV2L2	EXOSC8
	ILF3	EXOSC9	TTC37	EXOSC9
	IPO11	GTPBP1	XPO5	GTPBP1
	RAN	IRF2BPL	XPO6	IRF2BPL
	RANBP2	SKIV2L		SKIV2L2
	SKIV2L2	SKIV2L2		SUPV3L1
	TTC37	SUPV3L1		TTC37
	XPO5	TTC37		XRN1
	XPO6	XRN1
	XRN1
Cluster ID	Cluster11
Cell types	dNPC	dNeuron	vNPC	vNeuron
Gene counts	18	8	6	11
	ADCY6	AGRN	AGRN	AGRN
	AGRN	AKAP6	ATP1A1	AKAP6
	AKAP6	CACNA1H	ATP1A3	APBA1
	ANK3	GRIA2	LRP4	CACNA1H
	ASPM	KIF1A	NCAM1	CASK
	ATP1A1	LRP4	TPT1	GRIA2
	CACNA1H	NCAM1		KCNJ12
	CNR1	PPP2R4		KIF1A
	F8			LRP4
	FBN2			NCAM1
	GOLGA3			PPP2R4
	HSPA9
	KIF21B
	LRP4
	LRP6
	PLCB3
	PLXND1
	RNF216
Cluster ID	Cluster12
Cell types	dNPC	dNeuron	vNPC	vNeuron
Gene counts	22	16	9	20
	COX5B	ANK1	COX5B	ANK1
	COX6A1	ANK2	COX6A1	ANK2
	COX6C	ANK3	COX6C	ANK3
	COX7B	CNTN1	COX7B	DLG1
	COX7C	KCNQ2	COX7C	KCNQ2
	FBN1	KCNQ3	UQCRB	KCNQ3
	ITGA6	NFASC	UQCRC1	MTMR2
	ITGAV	NRCAM	UQCRH	NFASC
	ITGB8	PTPRA	VDAC1	NRCAM
	LAMA1	SCN2A		PPFIA2
	LAMB1	SPTAN1		PTPRA
	LAMB2	SPTB		SBF2
	LAMC1	SPTBN1		SCN2A
	MYH10	SPTBN2		SLC9A3R1
	MYH9	SPTBN4		SPTAN1
	RAVER1	SPTBN5		SPTB
	TLN1			SPTBN1
	UQCRB			SPTBN2
	UQCRC1			SPTBN4
	UQCRH			SPTBN5
	VCL
	VDAC1
Cluster ID	Cluster13
Cell types	dNPC	dNeuron	vNPC	vNeuron
Gene counts	13	17	14	32
	NCAPD2	ATL1	ADAR	ATM
	NCAPG	EXOC3	ADARB1	ATMIN
	NCAPH	NCAPD2	ATL1	BRCA1
	PDS5A	NCAPG	COL4A3BP	DST
	PDS5B	NCAPH	DACT1	HERC2
	PTPRJ	PTPRJ	EXOC3	MACF1
	RAD21	RAD21	GANAB	MCL1
	SMC2	REEP1	IFT88	MRE11A
	SMC3	RTN1	PRRC2A	PDS5A
	SMC4	SMC2	REEP1	PDS5B
	STAG1	SMC3	RTN1	PLK2
	STAG2	SMC4	SPAST	PTPRJ
	SYNE2	SPAST	SSNA1	RAD21
		STAG1	VANGL2	RANBP2
		STAG2		RNF8
		SYNE2		SALL1
		UBE2I		SMC1A
				SMC3
				STAG1
				STAG2
				SYNE2
				SYNE3
				TERF1
				TERF2
				TERT
				TNKS
				TNKS2
				TP53BP1
				UBA1
				UBA2
				UBE2I
				ZFHX3
Cluster ID	Cluster14
Cell types	dNPC	dNeuron	vNPC	vNeuron
Gene counts	83	84	66	94
	EIF4A3	COPS5	DOCK4	APOBR
	EIF4G1	DNAJC2	EEF2	ASCC3
	EIF5B	EEF2	EIF4A3	BCL2L13
	FAU	EIF2AK4	EIF4G1	COPS5
	GNB2L1	EIF2S1	EIF5B	DLGAP5
	GSPT2	EIF2S2	FAU	DNAJC2
	INS-IGF2	EIF3A	FYCO1	EEF2
	LRPPRC	EIF3B	GSPT2	EIF2AK4
	PLEC	EIF3D	INS-IGF2	EIF2S1
	PPP2R1A	EIF3E	LRPPRC	EIF2S2
	PPP2R2A	EIF3M	PLEC	EIF3A
	RPL10A	EIF4A1	PPP2R1A	EIF3B
	RPL11	EIF4A2	PPP2R2A	EIF3D
	RPL12	EIF4A3	RPL11	EIF3E
	RPL13A	EIF4B	RPL12	EIF3F
	RPL19	EIF4E	RPL23	EIF3M
	RPL21	EIF4EBP3	RPL24	EIF4A1
	RPL22L1	EIF4G1	RPL27	EIF4A2
	RPL23	EIF4G2	RPL27A	EIF4A3
	RPL23A	EIF4G3	RPL29	EIF4B
	RPL24	EIF4H	RPL30	EIF4E
	RPL26	EIF5B	RPL31	EIF4EBP3
	RPL27	FAU	RPL34	EIF4G1
	RPL27A	GSPT2	RPL35	EIF4G2
	RPL29	HDLBP	RPL35A	EIF4G3
	RPL30	INS-IGF2	RPL36	EIF4H
	RPL31	LRPPRC	RPL36AL	EIF5B
	RPL32	PABPC1	RPL37	FAU
	RPL34	PLEC	RPL37A	FYCO1
	RPL35	PPP2R1A	RPL38	GSPT2
	RPL35A	RPL11	RPL5	HDLBP
	RPL36	RPL12	RPL6	INS-IGF2
	RPL36AL	RPL23	RPL7A	JPH2
	RPL37	RPL27	RPL8	LRPPRC
	RPL37A	RPL27A	RPL9	PABPC1
	RPL38	RPL29	RPLP0	PLEC
	RPL39	RPL30	RPLP1	PRRC2B
	RPL5	RPL31	RPS10	RPL11
	RPL6	RPL34	RPS11	RPL12
	RPL7	RPL35	RPS12	RPL23
	RPL7A	RPL35A	RPS13	RPL24
	RPL8	RPL36	RPS14	RPL26
	RPL9	RPL37	RPS15A	RPL27
	RPLP0	RPL37A	RPS16	RPL27A
	RPLP1	RPL38	RPS19	RPL29
	RPS10	RPL5	RPS20	RPL30
	RPS11	RPL6	RPS23	RPL31
	RPS12	RPL7A	RPS24	RPL34
	RPS13	RPL8	RPS29	RPL35
	RPS14	RPL9	RPS3	RPL35A
	RPS15A	RPLP0	RPS5	RPL36
	RPS16	RPLP1	RPS6	RPL37
	RPS18	RPS10	RPS7	RPL37A
	RPS19	RPS11	RPS8	RPL38
	RPS2	RPS12	RPS9	RPL5
	RPS20	RPS13	SLIRP	RPL6
	RPS23	RPS14	SMG1	RPL7A
	RPS24	RPS15A	SMG5	RPL8
	RPS27	RPS16	SMG6	RPL9
	RPS27L	RPS19	SMG8	RPLP0
	RPS29	RPS20	SRP14	RPLP1
	RPS3	RPS23	SRP68	RPS10
	RPS3A	RPS24	SRP72	RPS11
	RPS4Y1	RPS29	STAU1	RPS12
	RPS5	RPS3	UPF1	RPS13
	RPS6	RPS5	UPF2	RPS14
	RPS7	RPS6		RPS15A
	RPS8	RPS7		RPS16
	RPS9	RPS8		RPS19
	RPSA	RPS9		RPS20
	RRM1	RRM1		RPS23
	SLIRP	RRM2		RPS24
	SMG1	RRM2B		RPS29
	SMG5	SLIRP		RPS3
	SMG6	SMG1		RPS4X
	SMG8	SMG5		RPS5
	SRP14	SMG6		RPS6
	SRP68	SMG8		RPS7
	SRP72	SRP14		RPS8
	UBA52	SRP68		RPS9
	UPF1	SRP72		RRM1
	UPF2	UBA52		RRM2
	USP5	UPF1		RRM2B
		UPF2		SLIRP
				SMG5
				SMG6
				SMG8
				SRP14
				SRP68
				SRP72
				UBA52
				UPF1
				UPF2
				USP5
Cluster ID	Cluster15
Cell types	dNPC	dNeuron	vNPC	vNeuron
Gene counts	5	10	5	19
	CHCHD3	ASPM	CHCHD3	ASPM
	HSPA4	DDR1	HSPA4	BIRC6
	IMMT	GCSAM	IMMT	CAP1
	OPA1	KIF21B	OPA1	CASP9
	XPR1	PHF1	XPR1	DDR1
		PPT2		FBXO18
		SLC26A9		GCSAM
		TP53BP2		HSPG2
		UBAP2L		KDM5C
		ZFYVE9		KIF21B
				PHF1
				PLEKHM2
				PPT2
				SKIV2L
				SLC26A9
				TCF19
				TP53BP2
				UBAP2L
				XRN2
Cluster ID	Cluster16
Cell types	dNPC	dNeuron	vNPC	vNeuron
Gene counts	126	31	67	27
	ACTL6A	ACTL6A	ACTB	ACTL6A
	ACTL6B	ACTL6B	ACTL6A	ACTL6B
	ANKRD11	ARID1A	ACTL6B	ARID1A
	ARID1A	ARID2	ANKRD11	ARID2
	ARID2	BAZ1A	ARID1A	BAZ1B
	ASH1L	BAZ1B	ARID2	CHAF1A
	ASH2L	CHAF1A	ATF7IP	CHD7
	ASXL1	CHD7	ATRX	CHD9
	ATF7IP	CHD9	BAZ1B	DPF2
	ATRX	DPF2	BRD8	DPF3
	BAZ1A	DPF3	CHAF1A	NCR1
	BAZ1B	IPO9	CHD1	PBRM1
	BAZ2A	NAP1L1	CHD7	PHB
	BCOR	NCR1	CHD8	PHF10
	BPTF	NOC2L	CHD9	RB1
	BRD1	PBRM1	CREBBP	SETDB1
	BRD7	PHB	DHX30	SMARCA2
	BRD8	PHF10	DNMT1	SMARCB1
	BRPF1	RB1	DPF2	SMARCC1
	BRPF3	SETDB1	DPF3	SMARCC2
	CABIN1	SMARCA2	EP300	SMARCD1
	CBX5	SMARCB1	EP400	SMARCD2
	CHAF1A	SMARCC1	FLII	SMARCD3
	CHD1	SMARCC2	H3F3A	SMARCE1
	CHD3	SMARCD1	H3F3B	TOP2A
	CHD4	SMARCD2	HCFC1	TOP2B
	CHD7	SMARCD3	HERC2	TSHZ3
	CHD8	SMARCE1	IPO7
	CHD9	TOP2A	KAT2B
	CREBBP	TOP2B	KMT2C
	DAXX	TSHZ3	KMT2D
	DHX30		LEMD3
	DNMT1		LPCAT1
	DPF3		MAX
	DROSHA		MEAF6
	EHMT1		MGA
	EHMT2		NCR1
	EP300		PARP1
	EP400		PBRM1
	EPC2		PHF10
	FLII		PHF20
	GLI2		RB1
	GON4L		RUVBL2
	GSE1		SETD1A
	H2AFZ		SETD1B
	H3F3A		SETDB1
	H3F3B		SMAD2
	HCFC1		SMARCA2
	HDAC1		SMARCB1
	HDAC5		SMARCC1
	HDAC6		SMARCC2
	HERC1		SMARCD1
	HERC2		SMARCD2
	HIST1H3H		SMARCD3
	HIST1H4B		SMARCE1
	HIST1H4C		SUPT6H
	ING5		TADA3
	IPO7		TAF1
	IPO9		TOP2A
	JARID2		TOP2B
	KAT2B		TRIM28
	KAT5		TRRAP
	KAT6A		TTF1
	KAT6B		UBE3A
	KDM1A		USP11
	KDM5A		ZFYVE9
	KDM5B		ZNF423
	KMT2C
	KMT2D
	LPCAT1
	MEAF6
	MGA
	MORF4L1
	MTA2
	NCR1
	NF1
	NFRKB
	NOTCH2
	NOTCH3
	PARP1
	PBRM1
	PHF10
	PHF20
	RB1
	RBBP4
	RBBP5
	RUVBL1
	RUVBL2
	SETD1A
	SETD1B
	SETD2
	SETDB1
	SIN3A
	SIRT1
	SLK
	SMARCA1
	SMARCA2
	SMARCA5
	SMARCB1
	SMARCC1
	SMARCC2
	SMARCD1
	SMARCD2
	SMARCD3
	SMARCE1
	SPEN
	SUPT6H
	SUV39H1
	TACC2
	TADA3
	TAF1
	TOP2A
	TOP2B
	TP53
	TRIM28
	TRRAP
	TTF1
	TTI1
	USP11
	WDR5
	YEATS2
	ZEB1
	ZMYM3
	ZNF217
	ZNF423
	ZZZ3
Cluster ID	Cluster17
Cell types	dNPC	dNeuron	vNPC	vNeuron
Gene counts	32	28	25	13
	APC	ARL3	AATK	ATP2B4
	CTNNB1	AURKA	BIRC6	CALM1
	EEA1	CALM1	CCNI	CALM2
	FAF1	CALM2	CDK5	CALM3
	GSK3B	CALM3	CDK5R1	EXOC2
	IFT172	CDC16	CRMP1	EXOC3
	INSR	CUL3	DCX	EXOC4
	LATS2	ENC1	DPYSL2	FAM213B
	MAGED1	GLI2	DPYSL4	MAP4K4
	MAGI1	KEAP1	DPYSL5	RALA
	MAP1B	KIF14	FES	RALBP1
	MAPK8IP2	KIF3A	HTT	RHOA
	MAPK8IP3	KIF3B	LMTK2	RTN1
	NEDD4L	KIF4A	MAPT
	NIN	KIFAP3	MYH10
	NOS2	KLHL11	MYH9
	OSBP	KLHL12	MYL12A
	PLXNB2	KLHL21	NES
	PPFIA1	KLHL7	OGDH
	PPFIBP1	KLHL9	PLXNA2
	PPP2R4	PARP4	PLXNA3
	PTCH1	POLB	PLXNA4
	PTPRF	PRC1	SEMA3A
	PTPRS	PRICKLE1	TNPO3
	RAPGEF2	SALL1	VIM
	RTN4	STK36
	TAX1BP1	TBL1X
	TP53BP2	TBL1XR1
	TSC2
	UBA1
	USP9X
	ZFYVE16
Cluster ID	Cluster18
Cell types	dNPC	dNeuron	vNPC	vNeuron
Gene counts	61	47	59	77
	AAAS	AURKB	AAAS	AAAS
	BANF1	BIRC5	BANF1	AURKB
	BUB1	BUB1	BUB1	BANF1
	BUB3	BUB1B	BUB3	BIRC5
	CASC5	BUB3	CASC5	BUB1
	CENPA	CASC5	CENPA	BUB1B
	CENPC	CDC20	CENPC	BUB3
	CENPE	CENPA	CENPE	CASC5
	CENPH	CENPC	CENPH	CDC20
	CENPK	CENPE	CENPK	CENPA
	CENPN	CENPF	CENPN	CENPC
	CENPO	CENPH	CENPO	CENPE
	CENPP	CENPK	CENPP	CENPF
	CENPQ	CENPN	CENPQ	CENPH
	CENPU	CENPO	CENPU	CENPK
	CS	CENPP	CS	CENPN
	IPO5	CENPQ	IPO5	CENPO
	KIF2A	CENPU	KIF2A	CENPP
	KPNB1	CLASP2	KPNB1	CENPQ
	MAD1L1	CLIP1	MAD1L1	CENPU
	MCM3AP	CLIP2	MCM3AP	CLASP2
	MIS12	INCENP	MIS12	CLIP1
	MYCBP2	KIF18A	MYCBP2	COL4A3BP
	NDC80	KIF2A	NDC80	INCENP
	NDEL1	KIF2C	NDEL1	IPO5
	NSL1	KNTC1	NSL1	KIF18A
	NUF2	MAD1L1	NUF2	KIF2A
	NUP107	MIS12	NUP107	KIF2C
	NUP133	NDC80	NUP133	KNTC1
	NUP153	NDEL1	NUP153	KPNB1
	NUP155	NPM1	NUP155	MAD1L1
	NUP160	NSL1	NUP160	MIS12
	NUP188	NUF2	NUP188	MYCBP2
	NUP205	NUP133	NUP205	NDC80
	NUP210	PPP1CC	NUP210	NDEL1
	NUP214	RANBP2	NUP214	NPM1
	NUP35	RANGAP1	NUP35	NSL1
	NUP37	RSF1	NUP37	NUF2
	NUP43	SEC13	NUP43	NUP107
	NUP50	SGOL1	NUP50	NUP133
	NUP54	SGOL2	NUP54	NUP153
	NUP62	SKA1	NUP62	NUP155
	NUP85	SMARCA5	NUP85	NUP160
	NUP88	SPDL1	NUP88	NUP188
	NUP93	TTBK2	NUP93	NUP205
	NUP98	ZW10	NUP98	NUP210
	NUPL2	ZWINT	NUPL2	NUP214
	OGDH		PPP1CC	NUP35
	PPP1CC		RAE1	NUP37
	RAE1		RANBP1	NUP43
	RANBP1		RANGAP1	NUP50
	RANGAP1		SEC13	NUP54
	SEC13		SEC16A	NUP62
	SEC16A		SGOL1	NUP85
	SENP1		SGOL2	NUP88
	SGOL1		SPDL1	NUP93
	SGOL2		TPR	NUP98
	SPDL1		UBR5	NUPL2
	TPR		ZWINT	PPP1CC
	UBR5			RAE1
	ZWINT			RAN
				RANBP1
				RANGAP1
				RSF1
				SEC13
				SENP1
				SGOL1
				SGOL2
				SKA1
				SMARCA5
				SPDL1
				TPR
				TTBK2
				XPO5
				XPO6
				ZW10
				ZWINT
Cluster ID	Cluster19
Cell types	dNPC	dNeuron	vNPC	vNeuron
Gene counts	50	46	47	42
	AFTPH	AFTPH	AFTPH	AFTPH
	AP1B1	ANKRD28	AP1B1	AP1B1
	AP1G1	AP1B1	AP1G1	AP1G1
	AP1G2	AP1G1	AP1G2	AP1G2
	AP1S1	AP1G2	AP1S1	AP1S1
	AP2A1	AP1S1	AP2A1	AP2A1
	AP2A2	AP2A1	AP2A2	AP2A2
	AP2M1	AP2A2	AP2M1	AP2M1
	AP2S1	AP2M1	AP2S1	AP2S1
	ARCN1	AP2S1	ARCN1	ARCN1
	B2M	ARCN1	B2M	B2M
	C12orf57	B2M	C3orf58	C3orf58
	C3orf58	C3orf58	CD74	CD74
	CALR	CD74	CLTC	CLTC
	CD74	CLTC	COPA	COPA
	CLTC	COPA	COPB1	COPB1
	COPA	COPB1	COPB2	COPB2
	COPB1	COPB2	COPE	COPE
	COPB2	COPE	COPG1	COPG1
	COPE	COPG1	COPZ1	COPZ1
	COPG1	COPZ1	EPS15	DNM2
	COPZ1	DNM2	FNDC3A	EPS15
	EPS15	EPS15	HLA-A	HLA-A
	FNDC3A	FNDC3A	HLA-C	HLA-C
	HLA-A	HLA-A	HLA-DRB1	HLA-DRB1
	HLA-C	HLA-C	HLA-DRB5	HLA-DRB5
	HLA-DRB1	HLA-DRB1	MEGF10	NCALD
	HLA-DRB5	HLA-DRB5	NCALD	RPS6KA2
	MEGF10	NCALD	PACS1	SCYL1
	NCALD	PACS1	RALBP1	SEC23A
	PACS1	RPS6KA2	RPS6KA2	SEC23B
	RPS6KA2	SCAP	SCAP	SEC24A
	SCAP	SCYL1	SCYL1	SEC24B
	SCYL1	SEC23A	SEC23A	SEC24C
	SEC23A	SEC23B	SEC23B	SEC24D
	SEC23B	SEC24A	SEC24A	SEC31A
	SEC24A	SEC24B	SEC24B	SGIP1
	SEC24B	SEC24C	SEC24C	SH3GL2
	SEC24C	SEC24D	SEC24D	TMED3
	SEC24D	SEC31A	SEC31A	TMED7
	SEC31A	SGIP1	SGIP1	VMA21
	SGIP1	SH3GL2	SH3GL2	XPOT
	SH3GL2	TMED3	SREBF2
	SNAP91	TMED7	TMED3
	SREBF2	VMA21	TMED7
	STON2	XPOT	VMA21
	TMED3		XPOT
	TMED7
	VMA21
	XPOT
Cluster ID	Cluster20
Cell types	dNPC	dNeuron	vNPC	vNeuron
Gene counts	30	21	36	28
	ABL1	ABR	ABR	ABR
	AMPH	ADAM15	ARHGAP35	ADAM15
	ARVCF	ARHGDIA	ARHGDIA	ARHGDIA
	ASAP1	ARHGEF11	ARHGEF11	ASAP3
	CDH1	ARHGEF12	ARHGEF12	CD44
	CDH2	MYOM2	CDH1	FLNC
	CSE1L	OBSCN	CDH2	GNB2L1
	CTNND1	PAK1	CIT	GSN
	CTNND2	PKN1	CSE1L	ILK
	CTTN	PLXNB2	CTNND1	IQGAP2
	DNM2	RAC1	CTNND2	KIRREL
	FGD1	RAC2	CTTN	MYLK
	GRIA2	RHOA	DNM2	PAK1
	GSN	RHOBTB2	EXOC2	PKM
	HIP1	RHOG	EXOC4	PKN1
	KIDINS220	RHOQ	FGD1	RAC2
	KIF1A	RHOU	GRIA2	RHOBTB2
	LRP5	RTN4	GSN	RHOG
	MYLK	SH3PXD2B	HIP1	RHOU
	PAK1	SVIL	KIDINS220	RTN4
	PKD1	TRIO	KIF1A	SACS
	PKN1		MAP4K4	SCRIB
	PRKD1		MAST4	SH3PXD2B
	PTK2		MYLK	SVIL
	SCRIB		OSBP	SYNM
	SH3PXD2B		PAK1	TLN1
	SVIL		PKN1	TRIO
	TJP1		PLXNB2	VCL
	TNIK		PRKD1
	TRIO		RHOA
			ROCK1
			RTN4
			SCRIB
			SH3PXD2B
			SVIL
			TJP1
Cluster ID	Cluster21
Cell types	dNPC	dNeuron	vNPC	vNeuron
Gene counts	20	17	17	17
	AIMP1	AIMP1	AIMP1	AIMP1
	AIMP2	AIMP2	AIMP2	AIMP2
	DARS	DARS	DARS	DARS
	EEF1E1	EEF1E1	EEF1E1	EEF1E1
	EPRS	EPRS	EPRS	EPRS
	HNRNPA1	HNRNPA1	HNRNPA1	HNRNPA1
	HNRNPA1L2	HNRNPA1L2	HNRNPA1L2	HNRNPA1L2
	IARS	IARS	IARS	IARS
	IRS1	KARS	KARS	KARS
	KARS	LARS	LARS	LARS
	LARS	MAPK8	MAPK8	MAPK8
	MAPK8	MARS	MARS	MARS
	MARS	PARK2	PARK2	PARK2
	PARG	PRRC2A	PCM1	PRRC2A
	PARK2	QARS	QARS	QARS
	PCM1	RARS	RARS	RARS
	PRRC2A	YARS	YARS	YARS
	QARS
	RARS
	YARS
Cluster ID	Cluster22
Cell types	dNPC	dNeuron	vNPC	vNeuron
Gene counts	22	7	16	25
	ASCC3	ASCC3	DLL1	ADRB1
	COPS5	CSNK2B	FANCI	ATL1
	DNAJC2	EIF3F	FASN	BRAF
	EIF2AK4	FSCN1	JAG1	BYSL
	EIF2S1	PREB	NEDD4	COG4
	EIF2S2	PRRC2B	NEDD4L	DCAF13
	EIF3A	SEC16A	NOTCH2	DDX1
	EIF3B		NOTCH3	EDNRA
	EIF3D		PARD3	GOLGA3
	EIF3E		PLAA	HEATR1
	EIF3F		RFWD2	NCAPD2
	EIF3M		SMO	NCAPG
	EIF4A1		UBA1	NCAPH
	EIF4A2		UBA2	NOP58
	EIF4B		UBA52	PHKA2
	EIF4E		USP5	PHKB
	EIF4EBP3			PREB
	EIF4G2			REEP1
	EIF4G3			RTCB
	EIF4H			SEC16A
	HDLBP			SMC2
	PRRC2B			SMC4
				SPAST
				UTP20
				WDR3
Cluster ID	Cluster23
Cell types	dNPC	dNeuron	vNPC	vNeuron
Gene counts	13	29	13	33
	CNOT1	ABCD1	CNOT1	ABCD1
	CNOT10	ABCD3	CNOT10	ABCD3
	CNOT11	CNOT1	CNOT11	ACLY
	CNOT2	CNOT10	CNOT2	CNOT1
	CNOT3	CNOT11	CNOT3	CNOT10
	CNOT4	CNOT2	CNOT4	CNOT11
	CNOT6	CNOT3	CNOT6	CNOT2
	CNOT7	CNOT4	CNOT7	CNOT3
	CNOT8	CNOT6	CNOT8	CNOT4
	PUM1	CNOT7	PUM1	CNOT6
	RQCD1	CNOT8	RQCD1	CNOT7
	TNKS	FASN	TNKS	CNOT8
	TNKS1BP1	FDFT1	TNKS1BP1	CSNK2B
		HMGCR		EEF1A1
		HMGCS1		FASN
		INSIG1		FDFT1
		MACF1		HMGCR
		NFYA		HMGCS1
		NFYB		INSIG1
		NFYC		NFYA
		NME4		NFYB
		PKD1L2		NFYC
		PTPN13		NME4
		PUM1		PKD1L2
		RQCD1		PTPN13
		SQLE		PUM1
		SREBF2		RQCD1
		THRSP		SCAP
		TNKS1BP1		SQLE
				SREBF2
				THRSP
				TNKS1BP1
				VCP
Cluster ID	Cluster24
Cell types	dNPC	dNeuron	vNPC	vNeuron
Gene counts	32	47	33	33
	ACTG1	ACTA1	ACTA1	ACTA1
	ACTN1	ACTC1	ACTC1	ACTC1
	ANK1	ACTN2	ACTG1	ACTN1
	ANK2	AKT2	ACTN2	ACTN2
	APC2	AMOT	ACTN4	ACTN4
	CD44	APC2	AMOT	AMOT
	CDK5	ARHGAP6	APC2	APC2
	CORO1A	CD2AP	ARHGAP6	ARHGAP6
	CRMP1	CDK5	ASAP3	CD2AP
	DPYSL3	CDK5R1	CD2AP	CFTR
	DSP	CFTR	CORO1A	CORO1A
	EZR	CORO1A	DAG1	DPYSL3
	FN1	CRMP1	DPYSL3	ESPN
	IGF2BP1	DPYSL2	ESPN	EZR
	IQGAP1	DPYSL3	EZR	GAS2
	KBTBD2	DPYSL4	FSCN1	IQGAP1
	LMTK2	DPYSL5	GAS2	LMTK2
	MYO6	ESPN	IQGAP1	MYH9
	MYO9A	EZR	KBTBD2	MYL6
	MYO9B	FARP2	MYL6	MYO1A
	NES	FES	MYO1A	MYO1C
	NF2	GAS2	MYO1C	MYO3A
	OBSCN	IQGAP1	MYO1E	MYO5A
	PLXNA2	KBTBD2	MYO3A	MYO6
	PLXNA4	LIMK1	MYO5A	MYO9A
	ROCK2	LIMK2	MYO6	MYO9B
	SACS	LMTK2	MYO9A	MYOM2
	SPTAN1	MYL6	MYO9B	NES
	SPTBN1	MYO1A	OBSCN	OBSCN
	SPTBN2	MYO1C	PALLD	PALLD
	VCAN	MYO3A	PRX	RAC3
	VIM	MYO5A	RHOQ	RHOQ
		MYO6	UTRN	VIM
		MYO9A
		MYO9B
		NES
		NISCH
		PAK2
		PALLD
		PLXNA2
		PLXNA3
		PLXNA4
		PLXNB1
		RAC3
		RND1
		SEMA3A
		SEMA6A
Cluster ID	Cluster25
Cell types	dNPC	dNeuron	vNPC	vNeuron
Gene counts	56	120	67	127
	ARHGAP32	ABL1	ADAM15	ABL1
	ARHGAP35	AGAP2	AMOTL2	AEBP1
	BCAR1	AKAP12	BCAR1	AKT1
	CAD	AKT1	BCR	AMPH
	CBL	ARHGAP32	CAD	ARHGAP32
	CHD6	ARHGAP35	CBL	ARHGAP35
	CPS1	ARHGAP5	CHD6	ARHGAP39
	DDR1	ARHGEF7	CPS1	ARHGEF12
	DOCK3	ASAP1	CRK	ARHGEF7
	EFNB1	BCAR1	DDR1	AXL
	EFNB2	BCR	DOCK3	BCAR1
	EPHA3	CAD	EDC4	BCR
	EPHA7	CAV1	EFNB1	CAD
	EPHB2	CBL	EFNB2	CAV1
	FGR	CDC42	EPHA2	CBL
	FLNA	CDH1	EPHA3	CPS1
	FLNB	CDH2	EPHA7	CRK
	FLNC	COL18A1	EPHB2	CTTN
	FYN	CRK	EPHB4	DCC
	GIT1	CTNND1	FGR	DOCK11
	GRB2	CTNND2	FLNA	DOCK3
	HCK	CTTN	FLNB	DOCK6
	IRS2	CYLD	FLNC	DOCK7
	JAK1	DCC	FYN	EFNB1
	JAK2	DOCK3	GIT1	EFNB2
	KALRN	EFNB1	GRB2	EFNB3
	KIF1C	EFNB2	HCK	EGF
	KIT	EGF	HRAS	EGFR
	LCK	EGFR	INSR	EPHA2
	LRP1	EPHA2	IQGAP3	EPHA3
	MAP1S	EPHA3	IRS1	EPHA7
	MAP4K4	EPHA7	IRS2	EPHB2
	NCK1	EPHB2	JAK1	ERBB2
	NCKAP1	ERBB2	JAK2	ERBB4
	PCDH18	ERBB4	KALRN	FGFR3
	PIK3CA	FGFR1	KIF1C	FGR
	PIK3CB	FGR	KIT	FLNA
	PITPNM1	FLNA	LCK	FLNB
	PLCG1	FN1	LRP1	FN1
	PTK2B	FYN	MAP1S	FYN
	PTPN11	GIT1	NCK1	GAPDH
	PTPN13	GRB10	NF1	GIT1
	PTPRD	GRB2	PCDH18	GPC1
	PTPRU	HCK	PIK3CA	GRB10
	PXN	HRAS	PITPNM1	GRB2
	RAPGEF1	IGF1	PLCG1	HCK
	RASA1	IGF1R	PTK2B	HCN4
	SHC1	IL17RD	PTPN11	HK2
	SOS1	ILK	PTPN13	HRAS
	SRC	INPPL1	PTPRA	IGF1
	STAT1	INSR	PTPRD	IGF1R
	STAT3	IRS1	PTPRJ	INPPL1
	STAT5B	IRS2	PTPRU	INSR
	SYK	ITGAV	PXN	IQSEC1
	TIAM1	ITSN1	RAPGEF1	IRS1
	YES1	JAK1	RASA1	IRS2
		JAK2	SHC1	ITGAV
		JAK3	SOS1	ITSN1
		KDR	SRC	JAK1
		KIT	STAT1	JAK2
		LCK	STAT3	JAK3
		LRP1	STAT5B	KALRN
		LTBP4	SYK	KIT
		MADD	THBS4	LCK
		MAP1B	TIAM1	LRP1
		MAP1S	TLN1	LTBP4
		MAP2	YES1	MADD
		MAP4K4		MAGED1
		MAPK1		MAP1B
		MAPK14		MAP2
		MET		MAP3K1
		MYLK		MAPK1
		MYOF		MET
		NCK1		MYOF
		NCK2		NCK1
		NCKAP1		NCK2
		NDUFAF2		NCKAP1
		NF1		NEDD9
		NGF		NF1
		NOS3		NGF
		NRXN1		NOS3
		PIK3CA		PIK3CA
		PIK3CB		PIK3CB
		PIK3CG		PIK3CG
		PIK3R2		PIK3R2
		PIK3R3		PIK3R3
		PIKFYVE		PIKFYVE
		PITPNM1		PITPNM1
		PLCG1		PLCG1
		PTEN		PTEN
		PTK2		PTK2
		PTK2B		PTK2B
		PTPN1		PTPN1
		PTPN11		PTPN11
		PTPRU		PTPRK
		PTPRZ1		PTPRZ1
		PXN		PXN
		RAPGEF1		RAC1
		RASA1		RALGDS
		RET		RAPGEF1
		RGMA		RASA1
		RRAS		RET
		SH3KBP1		RRAS
		SH3RF1		SH3KBP1
		SHC1		SHC1
		SHC3		SHC3
		SOS1		SLIT2
		SPAG9		SOS1
		SRC		SRC
		STAT1		SRGAP1
		STAT3		STAT1
		SYK		STAT3
		TIAM1		STON2
		TJP1		SULF1
		TLN1		SYK
		VAV1		TBC1D1
		VAV2		TIAM1
		WASL		TJP1
		WNK3		TNIK
		YES1		TNS3
				VAV1
				VAV2
				WASL
				WNK1
				WNK2
				WNK3
				YES1
Cluster ID	Cluster26
Cell types	dNPC	dNeuron	vNPC	vNeuron
Gene counts	142	100	139	102
	AGO2	AQR	AQR	AQR
	AQR	BUD31	BUD31	BUD31
	BUD13	CCAR1	CCAR1	CCAR1
	BUD31	CD2BP2	CCAR2	CD2BP2
	CCAR1	CDC40	CD2BP2	CDC40
	CD2BP2	CDC5L	CDC40	CDC5L
	CDC40	CLP1	CDC5L	CLP1
	CDC5L	CPSF2	CLP1	CPSF2
	CIC	CPSF3	CPSF2	CPSF3
	CLP1	CPSF7	CPSF3	CPSF7
	CPSF2	CRNKL1	CPSF7	CRNKL1
	CPSF3	CSTF1	CRNKL1	CSTF1
	CPSF7	CSTF2	CSTF1	CSTF2
	CRNKL1	CSTF3	CSTF2	CSTF3
	CSTF1	DDX23	CSTF3	DDX23
	CSTF2	DDX42	CTNNBL1	DDX42
	CSTF3	DDX5	CTR9	DDX5
	CTR9	DHX38	DDX23	DHX38
	DDX23	DHX8	DDX42	DHX9
	DDX42	DHX9	DDX46	DNAJC8
	DHX15	DNAJC8	DHX15	FUS
	DHX16	FUS	DHX38	GEMIN4
	DHX38	GTF2F1	DHX8	GEMIN5
	DHX8	GTF2F2	DHX9	GTF2F1
	DHX9	HNRNPA0	DNAJA1	GTF2F2
	DNAJC8	HNRNPA2B1	DNAJC8	HNRNPA0
	FMR1	HNRNPD	FUS	HNRNPA2B1
	FUS	HNRNPF	GEMIN4	HNRNPD
	GEMIN4	HNRNPK	GEMIN5	HNRNPF
	GEMIN5	HNRNPL	GTF2F1	HNRNPK
	GTF2F1	HNRNPM	GTF2F2	HNRNPL
	GTF2F2	HNRNPR	GTF3C1	HNRNPM
	GTF3C1	HNRNPU	GTF3C3	HNRNPR
	GTF3C2	HNRNPUL1	HNRNPA0	HNRNPU
	GTF3C3	MFAP1	HNRNPA2B1	HNRNPUL1
	GTF3C4	NCBP1	HNRNPD	IGF2BP1
	HNRNPA0	NCBP2	HNRNPF	MFAP1
	HNRNPA2B1	NFX1	HNRNPK	NCBP1
	HNRNPD	NHP2L1	HNRNPL	NCBP2
	HNRNPF	NUDT21	HNRNPM	NFX1
	HNRNPK	PABPN1	HNRNPR	NHP2L1
	HNRNPL	PCBP1	HNRNPU	NUDT21
	HNRNPM	PCBP2	HNRNPUL1	PABPN1
	HNRNPR	PCF11	HSPD1	PCBP1
	HNRNPU	PHF5A	HTATSF1	PCBP2
	HNRNPUL1	PLRG1	ILF3	PCF11
	KPNA2	POLR2B	KPNA2	PHF5A
	LSM2	POLR2C	LSM2	PLRG1
	LSM3	POLR2D	LSM3	POLR2B
	LSM7	POLR2G	LSM7	POLR2C
	LZTS1	POLR2I	MFAP1	POLR2D
	MFAP1	PRPF19	NCBP1	POLR2G
	NCBP1	PRPF4	NCBP2	POLR2I
	NCBP2	PRPF6	NFX1	PRPF19
	NFX1	PRPF8	NHP2L1	PRPF4
	NHP2L1	PTBP1	NUDT21	PRPF6
	NUDT21	RBM10	PABPN1	PRPF8
	PABPN1	RBM22	PCBP1	PTBP1
	PCBP1	RBM4	PCBP2	RBM10
	PCBP2	RBM5	PCF11	RBM22
	PCF11	RNPS1	PDS5A	RBM4
	PHF5A	SART1	PDS5B	RBM5
	PITRM1	SF3A1	PHF5A	RNPS1
	PLRG1	SF3A2	PIK3C2A	SART1
	POLR1A	SF3A3	PLRG1	SF3A1
	POLR1B	SF3B1	POLR1B	SF3A2
	POLR2B	SF3B2	POLR2B	SF3A3
	POLR2C	SF3B3	POLR2C	SF3B1
	POLR2D	SF3B4	POLR2D	SF3B2
	POLR2E	SF3B5	POLR2E	SF3B3
	POLR2F	SF3B6	POLR2F	SF3B4
	POLR2G	SMC1A	POLR2G	SF3B5
	POLR2I	SNRNP200	POLR2I	SF3B6
	POLR2L	SNRNP40	POLR2L	SNRNP200
	POLR3A	SNRNP70	POLR3A	SNRNP40
	POLR3B	SNRPA	PRPF19	SNRNP70
	PPIL1	SNRPA1	PRPF31	SNRPA
	PRPF19	SNRPB2	PRPF4	SNRPA1
	PRPF31	SNRPD2	PRPF6	SNRPB2
	PRPF4	SNRPD3	PRPF8	SNRPD2
	PRPF6	SNRPF	PTBP1	SNRPD3
	PRPF8	SNRPG	RBM10	SNRPF
	PTBP1	SRRM1	RBM22	SNRPG
	RBBP6	SRRM2	RBM4	SNW1
	RBM10	SRSF1	RBM5	SRRM1
	RBM22	SRSF11	RNPS1	SRRM2
	RBM4	SRSF2	SART1	SRSF1
	RBM5	SRSF3	SART3	SRSF11
	RNPS1	SRSF4	SCAF11	SRSF2
	SART1	SRSF5	SF3A1	SRSF3
	SART3	SRSF6	SF3A2	SRSF4
	SCAF11	SRSF7	SF3A3	SRSF5
	SCAF8	SRSF9	SF3B1	SRSF6
	SF3A1	SUGP1	SF3B2	SRSF7
	SF3A3	TXNL4A	SF3B3	SRSF9
	SF3B1	U2AF1	SF3B4	SUGP1
	SF3B2	U2AF2	SF3B5	TXNL4A
	SF3B3	UPF3B	SF3B6	U2AF1
	SF3B4	XAB2	SLU7	U2AF2
	SF3B5	YBX1	SMC1A	UPF3B
	SF3B6		SNRNP200	XAB2
	SLU7		SNRNP40	YBX1
	SMC1A		SNRNP70
	SNRNP200		SNRPA
	SNRNP40		SNRPA1
	SNRNP70		SNRPB
	SNRPA		SNRPB2
	SNRPA1		SNRPD2
	SNRPB		SNRPD3
	SNRPB2		SNRPE
	SNRPD2		SNRPF
	SNRPD3		SNRPG
	SNRPE		SNW1
	SNRPF		SRRM1
	SNRPG		SRRM2
	SNW1		SRSF1
	SRRM1		SRSF11
	SRSF1		SRSF2
	SRSF11		SRSF3
	SRSF2		SRSF4
	SRSF3		SRSF5
	SRSF4		SRSF6
	SRSF5		SRSF7
	SRSF6		SRSF9
	SRSF7		SSRP1
	SRSF9		STAG1
	SSRP1		SUGP1
	SUGP1		SUPT16H
	SUPT16H		SYMPK
	TBP		THOC2
	TDRD3		TRAP1
	THOC2		TXNL4A
	TNPO3		U2AF1
	TXNL4A		U2AF2
	U2AF1		UBL5
	U2AF2		UPF3B
	UBL5		XAB2
	UPF3B		YBX1
	URI1		ZC3H18
	USP4
	XAB2
	YBX1
Cluster ID	Cluster27
Cell types	dNPC	dNeuron	vNPC	vNeuron
Gene counts	81	29	104	32
	AKAP9	AKAP9	AKAP9	AKAP12
	AP3B1	CDK5RAP2	ANAPC1	AKAP9
	ARL3	CEP164	ANAPC5	ATXN10
	ATP2B4	CEP192	ARL3	CDK5RAP2
	AURKA	CKAP5	ATXN10	CEP164
	BIRC5	CLASP1	AURKA	CEP192
	CALM1	CSNK1D	AURKB	CKAP2
	CALM2	DCTN1	BIRC5	CKAP5
	CALM3	DCTN2	BRD4	CLASP1
	CDC16	DCTN3	BUB1B	CSNK1D
	CDK5RAP2	DYNC1H1	CALM1	DCTN1
	CENPF	DYNC2H1	CALM2	DCTN2
	CEP192	HAUS1	CALM3	DCTN3
	CEP350	HAUS6	CCNB1	DYNC1H1
	CKAP2	KIF26A	CDC16	DYNC2H1
	CKAP5	MAPRE1	CDC20	KIF26A
	CLASP1	NDE1	CDK5RAP2	MAPRE1
	CLASP2	NEK2	CECR2	NDE1
	CLIP2	ODC1	CENPF	NEK2
	COL4A3BP	PAFAH1B1	CEP164	ODC1
	CSNK1D	PCNT	CEP192	PAFAH1B1
	CUL3	PER1	CEP350	PCNT
	DLGAP5	PLK1	CKAP5	PER1
	DST	PRKAR2A	CLASP1	PLK1
	DYNC1H1	PRKAR2B	CLASP2	PPP2R1A
	DYNC2H1	SSNA1	CLIP1	PRKACB
	EWSR1	TUBGCP3	CLIP2	PRKAR2A
	FAM213B	YWHAE	CSNK1D	PRKAR2B
	FXR1	YWHAG	CUL3	SSNA1
	HDAC3		DCTN2	TUBGCP3
	HTR2C		DCTN3	YWHAE
	KIF11		DLGAP5	YWHAG
	KIF14		DYNC1H1
	KIF15		DYNC2H1
	KIF18A		FKBP4
	KIF1B		INCENP
	KIF23		KIF11
	KIF25		KIF15
	KIF26A		KIF18A
	KIF2C		KIF1B
	KIF3A		KIF20A
	KIF3B		KIF23
	KIF3C		KIF25
	KIF4A		KIF26A
	KIF5A		KIF2C
	KIF5B		KIF3A
	KIF5C		KIF3B
	KIFAP3		KIF3C
	KIFC1		KIF4A
	KIFC3		KIF5A
	KLC1		KIF5B
	KLC2		KIF5C
	KLHL11		KIFAP3
	KLHL21		KIFC3
	KLHL9		KLC1
	KNTC1		KLC2
	MAP6		KLHL11
	MPDZ		KLHL12
	MYO5A		KLHL21
	NCOR1		KLHL7
	ODC1		KLHL9
	PAFAH1B1		KNTC1
	PARP4		MAPRE1
	PCNT		MPDZ
	PER1		NDE1
	PKP4		NEK2
	PLEKHA1		NPM1
	PLK1		ODC1
	POLB		PAFAH1B1
	PPP2R5D		PARP4
	PRC1		PCNT
	RACGAP1		PER1
	RSF1		PLK1
	SKA1		PLK2
	SPAG5		POLB
	SPAST		PPP5C
	STARD9		PRC1
	TBL1X		PTTG1
	TBL1XR1		RACGAP1
	TUBGCP3		RAD21
	ZW10		RSF1
			SALL1
			SKA1
			SLX4
			SMARCA5
			SMC3
			SPAG5
			STAG2
			STARD9
			TACC2
			TACC3
			TBL1X
			TBL1XR1
			TEP1
			TERF1
			TNKS2
			TP53BP1
			TPX2
			TUBA1A
			TUBGCP3
			UBE2E1
			YWHAE
			YWHAG
			ZW10
Cluster ID	Cluster28
Cell types	dNPC	dNeuron	vNPC	vNeuron
Gene counts	25	42	8	11
	ACLY	AAAS	CSNK2B	MT-ND1
	ACTN4	ACLY	DST	MT-ND4L
	AHNAK	ADAR	MACF1	MT-ND5
	AKT1	ADARB1	NDUFS5	NDUFA1
	BIRC6	BANF1	NELL2	NDUFA4
	CCDC88A	CS	NME4	NDUFB2
	CLIP3	DACT1	PPP1R15B	NDUFB3
	FIG4	DNM1L	WDR48	NDUFB9
	HTT	IFT88		NDUFS1
	IMPDH2	IPO5		NDUFS4
	KANK1	KPNB1		NDUFS5
	LRP2	MCM3AP
	MADD	MFN2
	PARD3	MYCBP2
	PARK7	NUP107
	PDE3B	NUP153
	PIKFYVE	NUP155
	SERPINH1	NUP160
	SLC1A2	NUP188
	TBC1D1	NUP205
	USP1	NUP210
	VAC14	NUP214
	WDR48	NUP35
	WNK1	NUP37
	WNK3	NUP43
		NUP50
		NUP54
		NUP62
		NUP85
		NUP88
		NUP93
		NUP98
		NUPL2
		OGDH
		RAE1
		RAN
		RANBP1
		SENP1
		TPR
		VANGL2
		XPO5
		XPO6
Cluster ID	Cluster29
Cell types	dNPC	dNeuron	vNPC	vNeuron
Gene counts	18	38	9	31
	DEPTOR	AKAP13	DEPTOR	AKAP13
	EEF2	AMOTL1	MTOR	CREB1
	EML1	AMOTL2	PATZ1	CSN1S1
	FLCN	BACH2	PPFIA1	DEPTOR
	FNIP1	BRAF	PPFIBP1	FLCN
	FNIP2	CREB1	PPP2R4	FNIP2
	GPX1	CTNNB1	PREX2	FOXO1
	HSPG2	DEPTOR	RICTOR	HIP1
	IGDCC3	FLCN	RPS6KB1	HSP90AA1
	MTOR	FNIP1		HSPA4
	PATZ1	FNIP2		HTT
	PREX2	FOXO1		KIDINS220
	RB1CC1	GSK3B		MAST4
	RICTOR	HSP90AA1		MTOR
	RPS6KB1	HSPA4		NEDD4L
	RPTOR	HTT		PRKD1
	TAPBPL	ITGA6		RAF1
	VEGFA	KIDINS220		RB1CC1
		LATS2		RICTOR
		MAGED1		RPS6KB1
		MCL1		RPTOR
		MTOR		SBF1
		NEDD4L		TSC2
		PATZ1		TUBA1A
		PREX2		UNC45A
		PRKD1		USP9X
		RAF1		XPR1
		RB1CC1		YWHAB
		RICTOR		YWHAQ
		RPS6KB1		YWHAZ
		RPTOR		ZNF197
		TSC2
		USP9X
		WWTR1
		YAP1
		YWHAB
		YWHAQ
		YWHAZ
Cluster ID	Cluster30
Cell types	dNPC	dNeuron	vNPC	vNeuron
Gene counts	12	20	12	20
	CCAR2	AGO2	APEX1	ADAR
	DDX46	BIRC6	MAP3K5	ADARB1
	DDX5	CAP1	NLRP2	AGO2
	HSPA8	CASP9	NLRP3	DACT1
	HSPD1	CSE1L	POLA1	DDX3X
	HTATSF1	DICER1	POLE	DICER1
	PIK3C2A	EIF2AK2	PTEN	DNAJC6
	PPP1CA	FBXO18	REV3L	EIF2AK1
	SF3A2	FMR1	SENP1	EIF2AK2
	SRRM2	FXR1	TXN	FMR1
	ZC3H18	FXR2	TXNRD1	FXR1
	ZFR	GNB2L1	YAP1	FXR2
		JAG1		GANAB
		KPNA2		HSPA8
		MIB1		IFT88
		PLEKHM2		KPNA2
		PTPRM		MIB1
		TBC1D1		SYT4
		TBK1		TBK1
		UBA1		VANGL2
Cluster ID	Cluster31
Cell types	dNPC	dNeuron	vNPC	vNeuron
Gene counts	38	25	20	23
	APBB1	BCL9	APBB1	CDK8
	CDK8	CDK8	CELSR1	CREBBP
	CELSR1	CREBBP	DNTTIP2	EP300
	DNTTIP2	EP300	ESR1	MED1
	ESR1	MED1	GOLGA4	MED12
	GOLGA4	MED12	MED1	MED13
	GRIP1	MED13	MED12	MED13L
	MED1	MED13L	MED13	MED14
	MED12	MED14	MED13L	MED15
	MED13	MED15	MED24	MED17
	MED13L	MED17	MMS19	MED20
	MED14	MED20	MSH2	MED21
	MED15	MED21	NCOA1	MED24
	MED17	MED24	NCOA2	MED4
	MED20	MED4	NCOA3	MED6
	MED21	MED6	RXRA	NCOA1
	MED24	NCOA1	THRAP3	NCOA2
	MED4	NCOA2	TRIM24	NCOA3
	MED6	NCOA3	UNC45A	PPARGC1A
	MSH2	PIK3C2A	XBP1	RXRA
	NCOA1	PPARGC1A		SREBF1
	NCOA2	PYGO1		THRAP3
	NCOA3	RXRA		USP10
	NCOR2	SREBF1
	NME1	THRAP3
	NRIP1
	PPARA
	PPARG
	RARA
	RORB
	RXRA
	SOD1
	SREBF1
	THRAP3
	TRIM24
	UBA2
	UBE3A
	VDR
Cluster ID	Cluster32
Cell types	dNPC	dNeuron	vNPC	vNeuron
Gene counts	34	47	29	49
	ANAPC1	ACTB	APAF1	ACTB
	ANAPC5	AFF4	BRD1	AFF4
	AURKB	ASH1L	BRD7	ASH2L
	BARD1	ASH2L	BRPF1	BPTF
	BUB1B	BRD8	BRPF3	BRD1
	CCNB1	CHD8	CUL9	BRD8
	CDC20	CRABP2	DROSHA	BRPF1
	CECR2	EP400	EIF2AK2	BRPF3
	CEP164	H2AFZ	HERC1	CHD8
	CLIP1	H3F3A	HMGCR	EP400
	DCTN2	H3F3B	HSPA9	EPC2
	DCTN3	HCFC1	HUWE1	H2AFZ
	ESPL1	KAT2B	ING5	H3F3A
	HIST1H1E	KAT5	KAT6A	H3F3B
	HIST2H2AC	KMT2C	KAT6B	HCFC1
	INCENP	KMT2D	KDM5B	IFT57
	IRF2BPL	LRRTM2	PLK3	KAT2B
	MAPRE1	MAX	RB1CC1	KAT5
	NDE1	MDN1	RNF20	KAT6A
	NEK2	MGA	RNF40	KAT6B
	NPM1	MYC	RRM1	KMT2D
	PLK2	NCOA6	RRM2	MAX
	PTTG1	NFRKB	RRM2B	MEAF6
	SALL1	P2RY1	SETD2	MGA
	SSNA1	PAXIP1	SQLE	NCOA6
	TERF1	PHF20	TP53	NFRKB
	TICRR	PRPF31	TP53BP2	PAXIP1
	TP53BP1	RBBP5	USP7	PHF20
	TPT1	RNF2	USP9X	PRPF31
	UBE2E1	RUVBL1		RBBP5
	UBE2I	RUVBL2		RNF2
	YWHAE	SAP130		RUVBL1
	YWHAG	SEMA3E		RUVBL2
	ZNF704	SETD1A		SAP130
		SETD1B		SETD1A
		SETD2		SETD1B
		TADA3		SETD2
		TAF1		SMARCA1
		TAF9		SUPT6H
		TEX10		TADA3
		TRRAP		TAF1
		TTF1		TAF9
		TTI1		TEX10
		USP22		TRRAP
		WDR5		TTI1
		YEATS2		USP22
		ZZZ3		WDR5
				YEATS2
				ZZZ3
Cluster ID	Cluster33
Cell types	dNPC	dNeuron	vNPC	vNeuron
Gene counts	20	20	21	27
	BDP1	BDP1	CDK9	BDP1
	CDK9	CDK9	CIC	CDK9
	CTCF	GTF3C1	CTCF	CELSR1
	DDB1	GTF3C2	DDX5	ESR1
	HIST1H2AE	GTF3C3	EIF2AK1	GTF3C1
	HIST1H2AG	GTF3C4	HIPK1	GTF3C2
	HIST1H2AH	HIPK1	HSPA8	GTF3C3
	HIST1H2AJ	LZTS1	ILF2	GTF3C4
	HIST1H2AM	POLR1A	PARG	LZTS1
	PPARGC1A	POLR1B	POLR1A	POLR1A
	RTF1	POLR2E	RTF1	POLR1B
	SAP130	POLR2F	SAP130	POLR2E
	SND1	POLR2L	SND1	POLR2F
	TAF9	POLR3A	SYNE2	POLR2L
	TERF2	POLR3B	TAF9	POLR3A
	UBTF	SSRP1	TBP	POLR3B
	VHL	SUPT16H	TOP1	PPARA
	WDR82	TBP	UBTF	PPARG
	WDTC1	UBE4A	USP22	RARA
	ZNF197	UBTF	USP4	RORB
			ZFR	SUPT16H
				TBP
				TRIM24
				TTF1
				UBE4A
				UBTF
				VDR
Cluster ID	Cluster34
Cell types	dNPC	dNeuron	vNPC	vNeuron
Gene counts	47	88	43	79
	ACTB	AES	ASXL1	AES
	AR	AR	BAZ2A	AR
	CARM1	ASXL1	BCOR	ARNT2
	CNTN2	ATXN1L	BPTF	ASXL1
	CSN1S1	BAZ2A	CABIN1	BAZ2A
	CSNK2A1	BCOR	CHD3	BCOR
	CTBP1	CABIN1	CHD4	CABIN1
	DPF2	CARM1	CSNK2A1	CARM1
	E2F1	CBX5	CTBP1	CBX5
	EBF1	CELSR1	EHMT1	CHCHD3
	ENC1	CHD3	EHMT2	CHD3
	FASN	CHD4	GON4L	CHD4
	FKBP3	CIC	GTF2IRD1	CSNK2A1
	H2AFX	CSN1S1	HDAC1	CTBP1
	HDAC4	CSNK2A1	HDAC3	DAXX
	HDAC9	CTBP1	HDAC4	DNMT1
	HIF1A	DAXX	HDAC5	DROSHA
	HIST1H2BC	DNMT1	HDAC6	E2F1
	HIST1H2BD	DROSHA	HDAC9	EBF1
	HMGA1	E2F1	ING2	EHMT2
	HUWE1	EBF1	JARID2	GLI2
	ING2	ESR1	KDM1A	HDAC1
	LEF1	GSE1	KDM5A	HDAC3
	LEMD3	HDAC1	MORF4L1	HDAC4
	MAX	HDAC3	MTA2	HDAC5
	MDM2	HDAC4	NCOR1	HDAC6
	MYC	HDAC5	NCOR2	HDAC9
	NAP1L1	HDAC6	NRIP1	HERC1
	NCOA6	HDAC9	RBBP4	HIF1A
	NR3C1	HERC1	RBBP7	HIST1H1E
	PAXIP1	HIF1A	SAFB	HIST1H4B
	PHB	HIST1H4B	SAP18	HIST1H4C
	PPA1	HIST1H4C	SAP30	HUWE1
	RBBP7	HUWE1	SIN3A	ING2
	RNF2	ING2	SMARCA1	ING5
	RNF20	IPO7	SPEN	IPO7
	RUNX2	JARID2	SUV39H1	JUN
	SAP18	JUN	WIZ	KDM1A
	SAP30	KDM1A	YY1	KDM5A
	SMAD2	KDM5A	ZEB1	KDM5B
	SMAD3	KDM5B	ZEB2	LEF1
	SMAD4	LEF1	ZMYM3	LPCAT1
	SMARCAD1	MDM2	ZNF217	MDM2
	SP1	MORF4L1		MORF4L1
	WWP2	MTA2		MTA2
	YY1	NCOR1		MYC
	ZFYVE9	NCOR2		NCOR1
		NOTCH2		NCOR2
		NOTCH3		NOTCH2
		NR3C1		NOTCH3
		NRIP1		NR3C1
		PPARA		NRIP1
		PPARG		OPA1
		PRDM4		RBBP4
		RARA		RBBP7
		RBBP4		RELA
		RBBP7		RUNX2
		RELA		SAP18
		RORB		SAP30
		RUNX2		SIN3A
		SAP18		SIRT1
		SAP30		SMAD2
		SIN3A		SMAD3
		SIRT1		SMAD4
		SMAD2		SP1
		SMAD3		SPEN
		SMAD4		SRF
		SND1		SUV39H1
		SNW1		TLE1
		SP1		TP53
		SPEN		TRIM28
		SRF		UBE3A
		SUV39H1		USP11
		TLE1		WIZ
		TOPORS		YY1
		TP53		ZBTB16
		TRIM24		ZMYM3
		TRIM28		ZNF217
		TUBA1A		ZNF423
		UBE3A
		VDR
		WWP1
		YY1
		ZBTB16
		ZMIZ1
		ZMYM3
		ZNF217
		ZNF423
Cluster ID	Cluster35
Cell types	dNPC	dNeuron	vNPC	vNeuron
Gene counts	41	54	46	54
	ANKRD17	ATRIP	ANKRD17	ANKRD17
	ATRIP	CDC45	ATRIP	ATRIP
	BCCIP	CDC6	BCCIP	CCNB1
	CCND1	CDC7	CCND1	CDC45
	CCND2	CDK2	CCND2	CDC6
	CCND3	CHCHD3	CCND3	CDC7
	CCNE1	CLSPN	CCNE1	CDK2
	CCNY	DNA2	CCNY	CDK4
	CDC45	EEF1A1	CDC45	CHEK1
	CDC6	FEN1	CDC6	CLSPN
	CDC7	ILF2	CDC7	DNA2
	CDK12	ILF3	CDK12	FEN1
	CDK13	IMMT	CDK13	ILF2
	CDK14	KDM5C	CDK14	ILF3
	CDK2	LIG3	CDK2	LIG4
	CDK4	LIG4	CDK4	MCM2
	CDK6	MCM2	CDK6	MCM3
	CDKN1A	MCM3	CDKN1A	MCM4
	CDKN1B	MCM4	CDKN1B	MCM5
	CKS2	MCM5	CKS2	MCM6
	CLSPN	MCM6	CLSPN	MCM7
	FEN1	MCM7	DNA2	MCMBP
	GNAS	MCMBP	FEN1	MPRIP
	LIG3	NUAK1	GNAS	MSH2
	MCM2	OPA1	LIG3	MSH6
	MCM3	ORC1	LIG4	ORC1
	MCM4	ORC2	MCM2	ORC2
	MCM5	ORC3	MCM3	ORC3
	MCM6	ORC4	MCM4	ORC4
	MCM7	ORC5	MCM5	ORC5
	MLH1	PARP1	MCM6	PARP1
	MPRIP	PCNA	MCM7	PCNA
	ORC1	POLA1	MCMBP	POLA1
	ORC2	POLE	MLH1	POLE
[truncated: 1,034 more rows]

## Sheet: S3E. Enrich detail (dNPC)
Supplmentary Table S3E. Full list of Arboretum-hic clusters of dNPC enriched for functional pathways and diseases
* Tested for enrichment of Gene Ontology (GO) biological processes and diseases in DisGeNet using FDR corrected hypergeometric test
* FDR: Benjamini-Hochberg-corrected hypergeometric p-value (<0.05)
Cluster	Term	FDR		Cluster	Disease	FDR
Cluster1	adenylate cyclase-modulating G-protein coupled receptor signaling pathway	7.70627e-10		Cluster11	Post-Traumatic Stress Disorder	0.0366425
Cluster1	G-protein coupled receptor signaling pathway, coupled to cyclic nucleotide second messenger	5.17655e-09		Cluster13	Cornelia De Lange Syndrome	6.71067e-08
Cluster1	G-protein coupled receptor signaling pathway	5.17655e-09		Cluster14	Anemia, Diamond-Blackfan	5.40301e-15
Cluster1	adenylate cyclase-inhibiting G-protein coupled receptor signaling pathway	5.17655e-09		Cluster14	genital abnormal	3.39818e-14
Cluster1	signaling	1.27866e-07		Cluster14	reproductive system abnormality	3.39818e-14
Cluster1	signal transduction	1.27866e-07		Cluster14	Anemia, Macrocytic	3.64599e-13
Cluster1	regulation of phospholipase activity	3.27334e-07		Cluster14	Abnormality of the urinary system	2.49968e-12
Cluster1	cell communication	5.71653e-07		Cluster14	Hand deformities	3.75442e-12
Cluster1	positive regulation of phospholipase activity	7.00203e-07		Cluster14	Pallor	8.44672e-11
Cluster1	phospholipase C-activating G-protein coupled receptor signaling pathway	7.1631e-07		Cluster14	Intermittent migraine headaches	2.82834e-08
Cluster1	multicellular organismal process	7.18675e-07		Cluster14	Cardiac conduction abnormalities	2.82834e-08
Cluster1	elevation of cytosolic calcium ion concentration involved in phospholipase C-activating G-protein coupled signaling pathway	9.89093e-07		Cluster14	EKG abnormalities	2.82834e-08
Cluster1	multicellular organismal development	1.06183e-06		Cluster14	Electrocardiogram change	2.82834e-08
Cluster1	positive regulation of lipase activity	1.11753e-06		Cluster14	Conduction disorder of the heart	3.10797e-08
Cluster1	anatomical structure development	1.26248e-06		Cluster14	Electrocardiogram abnormal	7.87898e-08
Cluster1	positive regulation of hydrolase activity	3.10031e-06		Cluster14	Delayed Puberty	5.84894e-07
Cluster1	regulation of lipase activity	4.90675e-06		Cluster14	Cardiac Arrhythmia	4.976e-06
Cluster1	developmental process	6.39597e-06		Cluster14	Uranostaphyloschisis	2.56189e-05
Cluster1	system development	7.0284e-06		Cluster14	Erythroid hypoplasia	7.78644e-05
Cluster1	nervous system development	3.0502e-05		Cluster14	Cleft Palate	0.000277193
Cluster1	positive regulation of phospholipase C activity	3.0502e-05		Cluster14	Migraine Disorders	0.000742582
Cluster1	regulation of phospholipase C activity	3.58675e-05		Cluster14	Hypoplastic myelodysplasia	0.00278285
Cluster1	activation of protein kinase A activity	4.07155e-05		Cluster14	Fatigue	0.00291812
Cluster1	regulation of hydrolase activity	4.28288e-05		Cluster14	Congenital hypoplasia of radius	0.00499384
Cluster1	activation of phospholipase C activity	5.74677e-05		Cluster14	Radial ray hypoplasia	0.00499384
Cluster1	cell surface receptor signaling pathway	6.36478e-05		Cluster15	Parkinsonian Disorders	0.00162323
Cluster1	dopamine receptor signaling pathway	9.00692e-05		Cluster15	Schizophrenia	0.0269165
Cluster1	adenylate cyclase-activating G-protein coupled receptor signaling pathway	9.00692e-05		Cluster15	Amyloidosis	0.0269165
Cluster1	cellular response to glucagon stimulus	0.000110782		Cluster15	Degenerative polyarthritis	0.0269165
Cluster1	positive regulation of catalytic activity	0.000206302		Cluster15	Seizures	0.0269165
Cluster1	cAMP biosynthetic process	0.000230312		Cluster15	Colorectal Carcinoma	0.0375277
Cluster1	response to glucagon stimulus	0.000431779		Cluster16	Intellectual Disability	2.15326e-06
Cluster1	positive regulation of molecular function	0.000478012		Cluster16	Bushy eyebrows	7.44254e-06
Cluster1	negative regulation of cytoskeleton organization	0.000481749		Cluster16	Adenoid Cystic Carcinoma	7.44254e-06
Cluster1	regulation of cellular process	0.000490379		Cluster16	Cryptorchidism	1.55814e-05
Cluster1	biological regulation	0.000490379		Cluster16	Long eyelashes	4.84429e-05
Cluster1	regulation of biological process	0.000490379		Cluster16	Congenital malformation syndrome	5.71273e-05
Cluster1	cellular response to stimulus	0.000610081		Cluster16	Small head	0.000148883
Cluster1	regulation of signal transduction	0.000610081		Cluster16	Short stature	0.000148883
Cluster1	anatomical structure morphogenesis	0.000674237		Cluster16	Full lower lip	0.000148883
Cluster1	positive regulation of release of sequestered calcium ion into cytosol	0.000799348		Cluster16	Prominent lower lip	0.000148883
Cluster1	cytosolic calcium ion homeostasis	0.000990657		Cluster16	Low set ears	0.000186873
Cluster1	purine-containing compound metabolic process	0.00103369		Cluster16	Abnormality of cardiovascular system morphology	0.000186873
Cluster1	regulation of purine nucleotide metabolic process	0.00108058		Cluster16	Depressed nasal ridge	0.000186873
Cluster1	elevation of cytosolic calcium ion concentration	0.00110078		Cluster16	leukemia	0.000190729
Cluster1	negative regulation of protein polymerization	0.00111846		Cluster16	Rubinstein-Taybi Syndrome	0.00022754
Cluster1	regulation of nucleotide metabolic process	0.00115443		Cluster16	ALPHA-THALASSEMIA/MENTAL RETARDATION SYNDROME, NONDELETION TYPE, X-LINKED	0.000288114
Cluster1	fluid transport	0.00149179		Cluster16	Chondroblastoma	0.000288114
Cluster1	system process	0.00149179		Cluster16	Muscle hypotonia	0.000288114
Cluster1	response to isoquinoline alkaloid	0.00150128		Cluster16	Leukemia, Myelocytic, Acute	0.000353665
Cluster1	response to morphine	0.00150128		Cluster16	Dull intelligence	0.000353665
Cluster1	negative regulation of protein transport	0.00155027		Cluster16	Low intelligence	0.000353665
Cluster1	platelet activation	0.00164093		Cluster16	Poor school performance	0.000353665
Cluster1	cAMP metabolic process	0.00192478		Cluster16	Mental deficiency	0.000353665
Cluster1	renal system process	0.00196589		Cluster16	Patent ductus arteriosus	0.000364267
Cluster1	negative regulation of cAMP biosynthetic process	0.00243123		Cluster16	Self Mutilation	0.000598994
Cluster1	negative regulation of cAMP metabolic process	0.00243123		Cluster16	Leukemogenesis	0.000621086
Cluster1	purine nucleotide metabolic process	0.00301627		Cluster16	Developmental Disabilities	0.000635354
Cluster1	negative regulation of cyclic nucleotide biosynthetic process	0.00303013		Cluster16	Macrostomia	0.000697429
Cluster1	negative regulation of cyclic nucleotide metabolic process	0.00303013		Cluster16	Isolated cases	0.00112688
Cluster1	regulation of cyclic nucleotide metabolic process	0.0031034		Cluster16	Curvature of spine	0.0013737
Cluster1	regulation of molecular function	0.0032579		Cluster16	Coffin-Siris syndrome	0.0013737
Cluster1	regulation of cAMP biosynthetic process	0.0033108		Cluster16	Blepharoptosis	0.00168344
Cluster1	regulation of adenylate cyclase activity	0.0033108		Cluster16	Congenital deafness	0.00168344
Cluster1	transmission of nerve impulse	0.0033108		Cluster16	Joint hyperflexibility	0.00192206
Cluster1	neurogenesis	0.0033108		Cluster16	Feeding difficulties in infancy	0.00213045
Cluster1	intracellular signal transduction	0.0033108		Cluster16	Therapy-related myelodysplastic syndrome	0.00213045
Cluster1	calcium ion homeostasis	0.0033108		Cluster16	Acquired scoliosis	0.00213045
Cluster1	negative regulation of nucleotide biosynthetic process	0.0033108		Cluster16	Strabismus	0.00213045
Cluster1	negative regulation of purine nucleotide biosynthetic process	0.0033108		Cluster16	Impulsive Behavior	0.00213045
Cluster1	negative regulation of purine nucleotide metabolic process	0.0033108		Cluster16	Patella aplasia-hypoplasia	0.00213045
Cluster1	cellular developmental process	0.00339999		Cluster16	Prominent fingertip pads	0.00213045
Cluster1	generation of neurons	0.00354191		Cluster16	Pilocytic Astrocytoma	0.00219593
Cluster1	divalent inorganic cation homeostasis	0.00354191		Cluster16	Mental Retardation	0.00219593
Cluster1	nucleoside phosphate metabolic process	0.00354191		Cluster16	Neurodevelopmental Disorders	0.00222308
Cluster1	nucleotide metabolic process	0.00354191		Cluster16	Dental abnormalities	0.00222308
Cluster1	regulation of cAMP metabolic process	0.0035755		Cluster16	Splenic Marginal Zone B-Cell Lymphoma	0.00222308
Cluster1	regulation of locomotion	0.0035755		Cluster16	Endometrial Stromal Sarcoma	0.00236058
Cluster1	multicellular organismal signaling	0.00371933		Cluster16	hearing impairment	0.00244161
Cluster1	cyclic nucleotide biosynthetic process	0.00371933		Cluster16	CHARGE Syndrome	0.00244161
Cluster1	regulation of cyclase activity	0.00371933		Cluster16	Atrial Septal Defects	0.00256913
Cluster1	regulation of signaling	0.00383232		Cluster16	Congenital ocular coloboma (disorder)	0.00256913
Cluster1	regulation of catalytic activity	0.00384992		Cluster16	Sezary Syndrome	0.00280667
Cluster1	nucleobase-containing small molecule metabolic process	0.00398804		Cluster16	Schwannomatosis	0.00280667
Cluster1	neural crest cell development	0.00416023		Cluster16	Hearing Loss, Partial	0.00280667
Cluster1	nucleoside monophosphate biosynthetic process	0.00416023		Cluster16	Liposarcoma, Dedifferentiated	0.00280667
Cluster1	water transport	0.00416023		Cluster16	Angle class 2 malocclusion	0.00285945
Cluster1	regulation of small GTPase mediated signal transduction	0.00416023		Cluster16	Angle class 3 malocclusion	0.00285945
Cluster1	negative regulation of nucleotide metabolic process	0.00424851		Cluster16	Posteriorly rotated ear	0.00285945
Cluster1	regulation of lyase activity	0.00445491		Cluster16	Neuroectodermal Tumor, Primitive	0.00290599
Cluster1	organ development	0.00445491		Cluster16	Broad flat nasal bridge	0.00290599
Cluster1	limb bud formation	0.00445491		Cluster16	Nasal bridge wide	0.00290599
Cluster1	cellular calcium ion homeostasis	0.00445491		Cluster16	MIXED LINEAGE LEUKEMIA	0.0032531
Cluster1	cell differentiation	0.00445491		Cluster16	Central Nervous System Neoplasms	0.00332786
Cluster1	regulation of cyclic nucleotide biosynthetic process	0.00462692		Cluster16	Delayed speech and language development	0.00336289
Cluster1	regulation of cytoskeleton organization	0.00465933		Cluster16	Language Delay	0.00336289
Cluster1	cell part morphogenesis	0.00478021		Cluster16	Speech impairment	0.00336289
Cluster1	cellular divalent inorganic cation homeostasis	0.00478021		Cluster16	Downward slant of palpebral fissure	0.00336289
Cluster1	regulation of G-protein coupled receptor protein signaling pathway	0.00478021		Cluster16	Glomus Tumor	0.00336289
Cluster1	regulation of nucleotide biosynthetic process	0.00478021		Cluster16	Shawl scrotum	0.00336289
Cluster1	regulation of purine nucleotide biosynthetic process	0.00478021		Cluster16	high-grade childhood cerebral astrocytoma	0.00336289
Cluster1	positive regulation of calcium ion transport into cytosol	0.00478021		Cluster16	Deafness	0.00336289
Cluster1	regulation of actin filament depolymerization	0.00478021		Cluster16	Birthmark	0.00336716
Cluster1	positive regulation of cellular protein metabolic process	0.00487295		Cluster16	Byzanthine arch palate	0.00343673
Cluster1	neuron differentiation	0.00487295		Cluster16	Malocclusion	0.00347588
Cluster1	positive regulation of protein phosphorylation	0.00508958		Cluster16	Rhabdomyosarcoma	0.00351533
Cluster1	regulation of cellular component movement	0.00523713		Cluster16	Coloboma of iris	0.00367006
Cluster1	locomotion	0.00523713		Cluster16	Tooth Abnormalities	0.00370497
Cluster1	regulation of cell migration	0.00525829		Cluster16	Carcinogenesis	0.00404339
Cluster1	regulation of cell motility	0.00525829		Cluster16	Cafe-au-Lait Spots	0.00404339
Cluster1	Rho protein signal transduction	0.00525829		Cluster16	Global developmental delay	0.00420579
Cluster1	adenylate cyclase-inhibiting dopamine receptor signaling pathway	0.00525829		Cluster16	Coarse facial features	0.00420579
Cluster1	barbed-end actin filament capping	0.00525829		Cluster16	Thickened facial skin with coarse facial features	0.00420579
Cluster1	regulation of catecholamine uptake involved in synaptic transmission	0.00525829		Cluster16	Congenital dislocation of radial head	0.00425318
Cluster1	regulation of dopamine uptake involved in synaptic transmission	0.00525829		Cluster16	Low posterior hairline	0.00433603
Cluster1	substrate-independent telencephalic tangential interneuron migration	0.00525829		Cluster16	Myelodysplasia	0.00433718
Cluster1	substrate-independent telencephalic tangential migration	0.00525829		Cluster16	Speech Delay	0.00433718
Cluster1	thrombin receptor signaling pathway	0.00525829		Cluster16	Long philtrum	0.00438824
Cluster1	G-protein coupled acetylcholine receptor signaling pathway	0.00526292		Cluster16	Triple Negative Breast Neoplasms	0.00448001
Cluster1	phasic smooth muscle contraction	0.00526292		Cluster16	Non-Small Cell Lung Carcinoma	0.0048021
Cluster1	regulation of synaptic transmission, dopaminergic	0.00526292		Cluster16	Acute leukemia	0.00488663
Cluster1	cell projection morphogenesis	0.00603859		Cluster16	Laryngomalacia	0.00541183
Cluster1	synaptic transmission	0.00620808		Cluster16	Phonophobia	0.00541183
Cluster1	cell development	0.00639548		Cluster16	Single transverse palmar crease	0.0056938
Cluster1	positive regulation of phosphorylation	0.00660535		Cluster16	Congenital Epicanthus	0.00588453
Cluster1	negative regulation of actin filament polymerization	0.00662275		Cluster16	Curvature of digit	0.00588453
Cluster1	negative regulation of nucleocytoplasmic transport	0.00662275		Cluster16	Postnatal growth retardation	0.00588453
Cluster1	neurological system process	0.0067112		Cluster16	Large auricle	0.00588453
Cluster1	positive regulation of kinase activity	0.00687356		Cluster16	Large dysplastic ears	0.00588453
Cluster1	cell migration	0.00746853		Cluster16	Large pinnae	0.00588453
Cluster1	neural crest cell differentiation	0.00746853		Cluster16	Large prominent ears	0.00588453
Cluster1	regulation of Wnt receptor signaling pathway	0.00772528		Cluster16	Large protruding ears	0.00588453
Cluster1	regulation of actin cytoskeleton organization	0.00772528		Cluster16	Large, floppy ears	0.00588453
Cluster1	smooth muscle contraction	0.00774137		Cluster16	Macrotia	0.00588453
Cluster1	vascular endothelial growth factor receptor signaling pathway	0.00791729		Cluster16	Low anterior hairline	0.00602799
Cluster1	positive regulation of transferase activity	0.00794715		Cluster16	Malignant Childhood Neoplasm	0.00625475
Cluster1	central nervous system development	0.00794715		Cluster16	Congenital clinodactyly	0.00625475
Cluster1	positive regulation of phosphate metabolic process	0.00794715		Cluster16	Decreased pain sensation	0.00631674
Cluster1	positive regulation of phosphorus metabolic process	0.00794715		Cluster16	Anophthalmos	0.00663355
Cluster1	positive regulation of protein kinase activity	0.00794715		Cluster16	Dandy-Walker Syndrome	0.00663355
Cluster1	negative regulation of transport	0.00794715		Cluster16	Generalized hirsutism	0.00663355
Cluster1	negative regulation of protein complex assembly	0.00797764		Cluster16	Sarcoma, Epithelioid	0.00663355
Cluster1	morphogenesis of a branching structure	0.00832043		Cluster16	Mental Retardation, X-Linked	0.00696835
Cluster1	phospholipase C-activating dopamine receptor signaling pathway	0.00832748		Cluster16	Abnormally small eyeball	0.0074247
Cluster1	purinergic receptor signaling pathway	0.00832748		Cluster16	Decreased size of eyeball	0.0074247
Cluster1	regulation of multicellular organismal process	0.0085853		Cluster16	Congenital anomaly of the kidney	0.00746565
Cluster1	positive regulation of ERK1 and ERK2 cascade	0.0085853		Cluster16	Acute lymphocytic leukemia	0.00751654
Cluster1	regulation of systemic arterial blood pressure	0.00882367		Cluster16	Therapy-Related Acute Myeloid Leukemia	0.00780622
Cluster1	regulation of MAPK cascade	0.00897622		Cluster16	Carcinoma, Endometrioid	0.00792468
Cluster1	cell motility	0.00897622		Cluster16	Bowed and upward slanting eyebrows	0.00828645
Cluster1	localization of cell	0.00897622		Cluster16	Thick, flared eyebrows	0.00828645
Cluster1	cation homeostasis	0.00954095		Cluster16	Orbital separation excessive	0.00854255
Cluster1	fibroblast growth factor receptor signaling pathway	0.00954095		Cluster16	Microphthalmos	0.00854255
Cluster1	response to chemical stimulus	0.00970761		Cluster16	Slow-growing hair	0.00928433
Cluster1	post-embryonic development	0.00978173		Cluster16	Convex nasal bridge	0.00982236
Cluster1	regulation of cellular protein metabolic process	0.00989369		Cluster16	Prominent nasal bridge	0.00982236
Cluster1	regulation of ion homeostasis	0.0102844		Cluster16	Hydrocephalus	0.0124795
Cluster1	blood circulation	0.0103919		Cluster16	Brachydactyly	0.0127048
Cluster1	regulation of release of sequestered calcium ion into cytosol	0.0104707		Cluster16	Radially deviated fingers	0.0131982
Cluster1	heterocycle metabolic process	0.0105618		Cluster16	Choroid Plexus Carcinoma	0.013623
Cluster1	regulation of leukocyte chemotaxis	0.0106469		Cluster16	Fundus coloboma	0.013623
Cluster1	circulatory system process	0.0107211		Cluster16	Spina Bifida	0.0144291
Cluster1	cell projection organization	0.0107211		Cluster16	Cognitive delay	0.0152629
Cluster1	regulation of neutrophil chemotaxis	0.0107998		Cluster16	Mental and motor retardation	0.0152629
Cluster1	positive regulation of protein metabolic process	0.0109147		Cluster16	Inadequate arch length for tooth size	0.0152629
Cluster1	positive regulation of biological process	0.0116224		Cluster16	Strawberry nevus of skin	0.0152629
Cluster1	metal ion homeostasis	0.0116224		Cluster16	Tooth Crowding	0.0152629
Cluster1	negative regulation of intracellular protein transport	0.0116224		Cluster16	Tooth mass arch size discrepancy	0.0152629
Cluster1	cyclic nucleotide metabolic process	0.0118856		Cluster16	Tooth size discrepancy	0.0152629
Cluster1	adenylate cyclase-activating dopamine receptor signaling pathway	0.0118856		Cluster16	Abnormality of the thorax	0.0152629
Cluster1	regulation of neurotransmitter uptake	0.0118856		Cluster16	Hypoplastic iliac wing	0.0152629
Cluster1	retina layer formation	0.0118856		Cluster16	Narrow palate	0.0152629
Cluster1	ureter development	0.0118856		Cluster16	Fibroadenoma	0.0159416
Cluster1	regulation of actin filament-based process	0.0119019		Cluster16	Glioma	0.0164515
Cluster1	positive regulation of chemotaxis	0.0121132		Cluster16	Short distal phalanges	0.0166083
Cluster1	response to growth factor stimulus	0.0122497		Cluster16	Concave bridge of nose	0.0170957
Cluster1	regulation of behavior	0.0122845		Cluster16	Depressed nasal bridge	0.0170957
Cluster1	cell death	0.0129415		Cluster16	Depressed nasal root/bridge	0.0170957
Cluster1	cell morphogenesis	0.0129415		Cluster16	Bilateral fifth finger clinodactyly	0.0172094
Cluster1	actin filament capping	0.0129415		Cluster16	Curvature of little finger	0.0172094
Cluster1	negative regulation of protein import into nucleus	0.0129415		Cluster16	Long narrow head	0.0172094
Cluster1	regulation of protein complex disassembly	0.0129415		Cluster16	Narrow cranium shape	0.0172094
Cluster1	death	0.0133551		Cluster16	Narrow head shape	0.0172094
Cluster1	regulation of Ras protein signal transduction	0.013514		Cluster16	Narrow skull shape	0.0172094
Cluster1	nucleoside monophosphate metabolic process	0.0135487		Cluster16	Turridolichocephaly	0.0172094
Cluster1	positive regulation of locomotion	0.0136431		Cluster16	Hypoplastic mandible condyle	0.0187983
Cluster1	cellular response to growth factor stimulus	0.0136431		Cluster16	Acquired flat foot	0.0195035
Cluster1	regulation of leukocyte migration	0.013927		Cluster16	Flatfoot	0.0195035
Cluster1	positive regulation of cellular process	0.0140949		Cluster16	Squamous cell carcinoma of esophagus	0.0195035
Cluster1	positive regulation of MAPK cascade	0.0140964		Cluster16	Mandibular hypoplasia	0.0195035
Cluster1	regulation of ERK1 and ERK2 cascade	0.0140964		Cluster16	Micrognathism	0.0195035
Cluster1	response to stimulus	0.0143002		Cluster16	Hirsutism	0.0203206
Cluster1	negative regulation of intracellular transport	0.0146254		Cluster16	liposarcoma	0.0215794
Cluster1	regulation of protein metabolic process	0.0146254		Cluster16	Abnormal dermatoglyphic pattern	0.0219899
Cluster1	neuron development	0.0146254		Cluster16	Heart Septal Defects	0.0219991
Cluster1	cellular chemical homeostasis	0.0146254		Cluster16	Leukemia, Myelomonocytic, Chronic	0.022284
Cluster1	ion homeostasis	0.0146254		Cluster16	Low-set, posteriorly rotated ears	0.022284
Cluster1	positive regulation of multicellular organismal process	0.0146651		Cluster16	Medulloblastoma	0.0225775
Cluster1	cellular response to fibroblast growth factor stimulus	0.0146651		Cluster16	Short hands	0.0236113
Cluster1	response to fibroblast growth factor stimulus	0.0146651		Cluster16	Neoplasms, Neuroepithelial	0.0246369
Cluster1	negative regulation of Wnt receptor signaling pathway	0.0149015		Cluster16	Anaplastic astrocytoma	0.0250123
Cluster1	positive regulation of protein modification process	0.0149015		Cluster16	Pulmonary Stenosis	0.0253238
Cluster1	branching involved in salivary gland morphogenesis	0.0149015		Cluster16	Microstomia	0.0253238
Cluster1	negative regulation of actin filament depolymerization	0.0149015		Cluster16	Polyhydramnios	0.0253238
Cluster1	axonogenesis	0.0152315		Cluster16	Carcinoma, Small Cell	0.0264404
Cluster1	learning or memory	0.0152315		Cluster16	Hepatocarcinogenesis	0.0265038
Cluster1	morphogenesis of a branching epithelium	0.0152315		Cluster16	pediatric acute myeloblastic leukemia	0.0265969
Cluster1	positive regulation of kidney development	0.0153919		Cluster16	Ewings sarcoma	0.0275069
Cluster1	positive regulation of cell proliferation	0.0157133		Cluster16	Borderline Personality Disorder	0.0280639
Cluster1	cellular homeostasis	0.0157133		Cluster16	Invasive carcinoma of breast	0.0282328
Cluster1	activation of protein kinase activity	0.0158079		Cluster16	Congenital hypoplasia of penis	0.0282328
Cluster1	nerve growth factor receptor signaling pathway	0.0158079		Cluster16	Central Serous Chorioretinopathy	0.0292545
Cluster1	cellular component morphogenesis	0.0159442		Cluster16	Soft Tissue Neoplasms	0.0292545
Cluster1	regulation of organ morphogenesis	0.0159633		Cluster16	High grade serous carcinoma	0.0296411
Cluster1	cellular metal ion homeostasis	0.0161981		Cluster16	Megacolon	0.0296411
Cluster1	cochlea morphogenesis	0.017882		Cluster16	Obesity, Abdominal	0.0296411
Cluster1	mesenchymal cell differentiation	0.0179196		Cluster16	Melanocytic nevus of skin	0.0299905
Cluster1	neuron projection development	0.0185129		Cluster16	Protruding ears	0.0299905
Cluster1	central nervous system neuron development	0.0186772		Cluster16	Stereotyped Behavior	0.0299905
Cluster1	positive regulation of leukocyte chemotaxis	0.0186772		Cluster16	Acute monocytic leukemia	0.0299905
Cluster1	positive regulation of cell migration	0.018741		Cluster16	Ventricular Septal Defects	0.0304201
Cluster1	cholesterol biosynthetic process	0.018741		Cluster16	Traditional Serrated Adenoma	0.0311124
Cluster1	negative regulation of protein complex disassembly	0.018741		Cluster16	Prominent ear	0.0317282
Cluster1	purine ribonucleoside metabolic process	0.018741		Cluster16	Triangular face	0.0317282
Cluster1	anatomical structure formation involved in morphogenesis	0.0189759		Cluster16	Gait, Unsteady	0.0320486
Cluster1	cerebral cortex development	0.0195118		Cluster16	Autism Spectrum Disorders	0.0320486
Cluster1	ERBB signaling pathway	0.0195118		Cluster16	Primary malignant neoplasm of lung	0.0331275
Cluster1	epidermal growth factor receptor signaling pathway	0.0195118		Cluster16	Stereotypic Movement Disorder	0.0335318
Cluster1	purine nucleoside metabolic process	0.0195118		Cluster16	Fetal Growth Retardation	0.0335318
Cluster1	neuron projection morphogenesis	0.0198701		Cluster16	Anteverted nostril	0.0342641
Cluster1	regulation of anatomical structure size	0.0199719		Cluster16	Narrow forehead	0.0342813
Cluster1	G-protein coupled receptor internalization	0.0199719		Cluster16	Neuroectodermal Tumors	0.0342813
Cluster1	positive regulation of G-protein coupled receptor protein signaling pathway	0.0199719		Cluster16	Poorly differentiated carcinoma	0.0342813
Cluster1	vascular smooth muscle contraction	0.0199719		Cluster16	Therapy-Related Leukemia	0.0342813
Cluster1	cell-cell signaling	0.0201551		Cluster16	childhood brain tumor	0.0342813
Cluster1	cell proliferation in forebrain	0.0201551		Cluster16	Fanconi Anemia	0.0342813
Cluster1	negative regulation of adenylate cyclase activity	0.0201551		Cluster16	Joint laxity	0.0344577
Cluster1	positive regulation of positive chemotaxis	0.0201551		Cluster16	Narrow face	0.0344577
Cluster1	purine ribonucleoside triphosphate catabolic process	0.0201551		Cluster16	Thin face	0.0344577
Cluster1	ribonucleoside triphosphate catabolic process	0.0201551		Cluster16	synovial sarcoma	0.0360972
Cluster1	regulation of interleukin-1 beta production	0.0201551		Cluster16	Intrauterine retardation	0.0364164
Cluster1	salivary gland development	0.0201551		Cluster16	Refractory cancer	0.0364164
Cluster1	sterol biosynthetic process	0.0201551		Cluster16	Congenital ear anomaly NOS (disorder)	0.0365021
Cluster1	negative regulation of canonical Wnt receptor signaling pathway	0.0201551		Cluster16	Failure to thrive in infancy	0.0365021
Cluster1	regulation of GTPase activity	0.0206157		Cluster16	Heparin-induced thrombocytopenia	0.0365021
Cluster1	positive regulation of behavior	0.0207683		Cluster16	Neck webbing	0.0365021
Cluster1	positive regulation of cell motility	0.0207683		Cluster16	Panhypopituitarism	0.0365021
Cluster1	purine nucleoside triphosphate catabolic process	0.0207683		Cluster16	Infant, Small for Gestational Age	0.036818
Cluster1	positive regulation of secretion	0.0207683		Cluster16	Retinoblastoma	0.0386394
Cluster1	regulation of response to stimulus	0.0213496		Cluster16	Glioblastoma	0.0390442
Cluster1	chemotaxis	0.0213592		Cluster16	Frontal bossing	0.0390442
Cluster1	taxis	0.0213592		Cluster16	Auricular malformation	0.0390442
Cluster1	nucleoside triphosphate catabolic process	0.0213592		Cluster16	Dysmorphic features	0.0390442
Cluster1	purine ribonucleotide catabolic process	0.0213592		Cluster16	Simple ear	0.0390442
Cluster1	ribonucleotide catabolic process	0.0213592		Cluster16	Wide nose	0.0390442
Cluster1	response to external stimulus	0.0214773		Cluster16	Aggressive behavior	0.0390442
Cluster1	regulation of GTP catabolic process	0.0221529		Cluster16	Dysplastic Nevus	0.0390442
Cluster1	positive regulation of cell communication	0.0223585		Cluster16	Enophthalmos	0.0390442
Cluster1	cognition	0.0223812		Cluster16	Physical aggression	0.0390442
Cluster1	purine ribonucleotide metabolic process	0.0225827		Cluster16	Sunken eyes	0.0390442
Cluster1	positive regulation of signaling	0.0225827		Cluster16	Leukemia, Lymphocytic, Acute, L1	0.039079
Cluster1	negative regulation of cyclase activity	0.0225827		Cluster16	Delayed bone age	0.0391377
Cluster1	regulation of positive chemotaxis	0.0225827		Cluster16	Decreased projection of midface	0.0402224
Cluster1	cellular ion homeostasis	0.0231199		Cluster16	Hypotrophic midface	0.0402224
Cluster1	regulation of canonical Wnt receptor signaling pathway	0.0236719		Cluster16	Midface retrusion	0.0402224
Cluster1	prepulse inhibition	0.0242952		Cluster16	Mild Mental Retardation	0.0402224
Cluster1	regulation of ARF GTPase activity	0.0242952		Cluster16	Small midface	0.0402224
Cluster1	transmembrane receptor protein tyrosine kinase signaling pathway	0.0242952		Cluster16	Rhabdoid Tumor	0.0402946
Cluster1	branching morphogenesis of a tube	0.0243921		Cluster16	Undifferentiated leukemia	0.0402946
Cluster1	regulation of protein polymerization	0.024522		Cluster16	Columnar Cell Change of the Breast	0.0407362
Cluster1	tube formation	0.024522		Cluster16	Mitochondrial abnormalities	0.0407362
Cluster1	negative regulation of transmembrane transport	0.0246031		Cluster16	M5b Acute differentiated monocytic leukemia	0.0413404
Cluster1	ribonucleoside metabolic process	0.0247585		Cluster16	Pectus excavatum	0.0413404
Cluster1	ribonucleotide metabolic process	0.0247585		Cluster16	Memory impairment	0.0418299
Cluster1	cell morphogenesis involved in neuron differentiation	0.0247585		Cluster16	Adenocarcinoma, Endometrioid	0.0418299
Cluster1	tube development	0.0257928		Cluster16	Syndactyly	0.0418299
Cluster1	negative regulation of lyase activity	0.0257928		Cluster16	Penile hypospadias	0.0418299
Cluster1	neural retina development	0.0257928		Cluster16	Malignant Peripheral Nerve Sheath Tumor	0.0430778
Cluster1	protein kinase B signaling cascade	0.0257928		Cluster16	Cerebellar hypoplasia and atrophy	0.0430778
Cluster1	pallium development	0.0257928		Cluster16	Defective enamel matrix	0.0430778
Cluster1	learning	0.0259133		Cluster16	Dysplasia of tooth enamel	0.0430778
Cluster1	regulation of actin polymerization or depolymerization	0.0259133		Cluster16	Thin dental enamel	0.0430778
Cluster1	regulation of system process	0.0262406		Cluster16	Small cell carcinoma of lung	0.043365
Cluster1	positive regulation of cellular metabolic process	0.0262406		Cluster16	Aggressive reaction	0.0433897
Cluster1	GTP catabolic process	0.026316		Cluster16	Leiomyosarcoma of uterus	0.0467019
Cluster1	regulation of calcium ion transport into cytosol	0.0265614		Cluster16	Monoclonal Gammapathies	0.0467019
Cluster1	regulation of interleukin-1 production	0.0265614		Cluster16	Conductive hearing loss	0.0478129
Cluster1	positive regulation of cellular component movement	0.0269277		Cluster16	Cockayne Syndrome	0.0485893
Cluster1	tube morphogenesis	0.0269277		Cluster16	Agenesis of corpus callosum	0.0490441
Cluster1	ear morphogenesis	0.0269277		Cluster16	Teratocarcinoma	0.0496043
Cluster1	purine nucleotide biosynthetic process	0.0269277		Cluster16	Malignant mesothelioma	0.0498574
Cluster1	guanosine-containing compound catabolic process	0.0271921		Cluster16	Acute Myeloid Leukemia Arising from Previous Myelodysplastic Syndrome	0.0498722
Cluster1	regulation of Rho protein signal transduction	0.0271921		Cluster16	Plexiform Neurofibroma	0.0498722
Cluster1	regulation of protein phosphorylation	0.0271921		Cluster17	Odontogenic Tumors	0.000222388
Cluster1	regulation of actin filament length	0.0271921		Cluster17	Abnormality of the abdominal wall	0.00112089
Cluster1	cellular cation homeostasis	0.0273797		Cluster17	Multiple, subcutaneous nodules	0.00354474
Cluster1	regulation of intracellular protein kinase cascade	0.027459		Cluster17	Subcutaneous nodule	0.00354474
Cluster1	positive regulation of calcium ion transport	0.0280452		Cluster17	Peutz-Jeghers Syndrome	0.00354474
Cluster1	positive regulation of signal transduction	0.0282964		Cluster17	fibroma	0.00400732
Cluster1	purine-containing compound biosynthetic process	0.0282964		Cluster17	Cerebral calcification	0.0123964
Cluster1	regulation of catecholamine secretion	0.0284161		Cluster17	Ameloblastoma	0.0295509
Cluster1	regulation of cellular response to growth factor stimulus	0.0284161		Cluster17	Neoplastic Cell Transformation	0.0295509
Cluster1	synapse assembly	0.0284161		Cluster17	Colonic Polyps	0.0325007
Cluster1	behavior	0.0284161		Cluster17	Microsatellite Instability	0.0349999
Cluster1	positive regulation of neutrophil chemotaxis	0.0284161		Cluster17	Cholestasis	0.043001
Cluster1	synaptic transmission, dopaminergic	0.0284161		Cluster17	Acromegaly	0.043001
Cluster1	regulation of metabolic process	0.0286842		Cluster17	Pituitary Adenoma	0.043001
Cluster1	purine ribonucleoside triphosphate metabolic process	0.0290827		Cluster17	Multiple tumors	0.0441806
Cluster1	mesenchyme development	0.0291953		Cluster18	Steroid resistant nephrotic syndrome of childhood	0.0141812
Cluster1	purine nucleoside catabolic process	0.0292649		Cluster18	Steroid-resistant nephrotic syndrome	0.0141812
Cluster1	purine ribonucleoside catabolic process	0.0292649		Cluster19	Pityriasis Rosea	2.53453e-05
Cluster1	ameboidal cell migration	0.0297909		Cluster19	Alveolar echinococcosis	0.000569529
Cluster1	ribonucleoside triphosphate metabolic process	0.0299271		Cluster19	Hemochromatosis	0.000883554
Cluster1	energy reserve metabolic process	0.0308609		Cluster19	HEMOCHROMATOSIS, TYPE 1	0.00104791
Cluster1	purine nucleoside triphosphate metabolic process	0.0310851		Cluster19	Arthrofibrosis	0.00104791
Cluster1	regulation of primary metabolic process	0.0315553		Cluster19	Seropositive rheumatoid arthritis	0.00104791
Cluster1	negative regulation of protein secretion	0.0320579		Cluster19	Oligoarticular Arthritis	0.00117326
Cluster1	negative regulation of transporter activity	0.0320579		Cluster19	Tumor Virus Infections	0.00117326
Cluster1	developmental growth involved in morphogenesis	0.0320579		Cluster19	Hemoglobinuria, Paroxysmal	0.00202898
Cluster1	positive regulation of leukocyte migration	0.0320579		Cluster19	Drug toxicity	0.00220284
Cluster1	purine nucleotide catabolic process	0.0320579		Cluster19	PEELING SKIN SYNDROME	0.00220284
Cluster1	programmed cell death	0.0320579		Cluster19	Rheumatic Heart Disease	0.00223927
Cluster1	nucleoside metabolic process	0.0324895		Cluster19	Bare Lymphocyte Syndrome	0.00223927
Cluster1	purine-containing compound catabolic process	0.0333314		Cluster19	Chromosome 11p11.2 Deletion Syndrome	0.00223927
Cluster1	embryo development	0.0335721		Cluster19	Substance Abuse, Intravenous	0.00264726
Cluster1	GTP metabolic process	0.0336089		Cluster19	Abruptio Placentae	0.00308742
Cluster1	muscle contraction	0.0337372		Cluster19	Recurrent respiratory papillomatosis	0.00355928
Cluster1	regulation of blood pressure	0.0337372		Cluster19	Addison's disease due to autoimmunity	0.00406235
Cluster1	exocrine system development	0.0338541		Cluster19	Schwartz-Jampel Syndrome	0.00459618
Cluster1	regulation of phosphorylation	0.0338541		Cluster19	Tonsillar Squamous Cell Carcinoma	0.00491456
Cluster1	bone morphogenesis	0.0338541		Cluster19	Typhoid Fever	0.00491456
Cluster1	negative regulation of G-protein coupled receptor protein signaling pathway	0.0338541		Cluster19	Bare lymphocyte syndrome 2	0.00549265
Cluster1	pigmentation	0.0338541		Cluster19	Spondylarthropathies	0.00673676
Cluster1	positive regulation of homeostatic process	0.0338541		Cluster19	Equine Infectious Anemia	0.00673676
Cluster1	bone development	0.0338541		Cluster19	Arthropathy	0.00706522
Cluster1	inner ear morphogenesis	0.0338541		Cluster19	Combined immunodeficiency	0.00711718
Cluster1	positive regulation of ion transport	0.0338541		Cluster19	Abortion, Habitual	0.00719532
Cluster1	brain development	0.0339127		Cluster19	Toxic Epidermal Necrolysis	0.00956413
Cluster1	regulation of chemotaxis	0.0339868		Cluster19	Leptospirosis	0.00999442
Cluster1	telencephalon development	0.0342224		Cluster19	Parvovirus B19 (disease)	0.00999442
Cluster1	activation of adenylate cyclase activity	0.0352815		Cluster19	Hypersensitivity	0.0128204
Cluster1	regulation of vasodilation	0.0352815		Cluster19	Autoimmune Primary Adrenal Insufficiency	0.0128204
Cluster1	retina morphogenesis in camera-type eye	0.0352815		Cluster19	Cholangitis, Sclerosing	0.0132954
Cluster1	nucleoside triphosphate metabolic process	0.0353263		Cluster19	Herpesviridae Infections	0.0132954
Cluster1	cell morphogenesis involved in differentiation	0.035581		Cluster19	Complete atrioventricular block	0.0134145
Cluster1	Ras protein signal transduction	0.035581		Cluster19	Chronic ulcerative colitis	0.0146884
Cluster1	ribonucleoside catabolic process	0.035581		Cluster19	Chagas Cardiomyopathy	0.0146884
Cluster1	positive regulation of cell division	0.0360998		Cluster19	Congenital adrenal hyperplasia	0.0153074
Cluster1	morphogenesis of embryonic epithelium	0.0380342		Cluster19	Coronary Aneurysm	0.0153074
Cluster1	negative regulation of secretion	0.0380342		Cluster19	Hemophilia B	0.0153074
Cluster1	cellular process	0.0382122		Cluster19	Optic Neuritis	0.0153074
Cluster1	ER-nucleus signaling pathway	0.0382122		Cluster19	Spinal Cord Diseases	0.0153074
Cluster1	nucleotide catabolic process	0.0382493		Cluster19	Hemophilia A	0.0153074
Cluster1	cochlea development	0.0392283		Cluster19	HTLV-I Infections	0.01558
Cluster1	patterning of blood vessels	0.0392283		Cluster19	Infectious Mononucleosis	0.01558
Cluster1	protein kinase C-activating G-protein coupled receptor signaling pathway	0.0392283		Cluster19	Neuromyelitis Optica	0.0163724
Cluster1	regulation of nucleotide catabolic process	0.0392283		Cluster19	Classical Hodgkin's Lymphoma	0.0163724
Cluster1	regulation of purine nucleotide catabolic process	0.0392283		Cluster19	Severe Acute Respiratory Syndrome	0.0186631
Cluster1	positive regulation of phosphatidylinositol 3-kinase cascade	0.0392283		Cluster19	Henoch-Schoenlein Purpura	0.0186631
Cluster1	regulation of smooth muscle contraction	0.0392283		Cluster19	Thyroiditis	0.0186631
Cluster1	regulation of ion transport	0.0392283		Cluster19	Tropical Spastic Paraparesis	0.0186631
Cluster1	epithelial tube branching involved in lung morphogenesis	0.0392283		Cluster19	Hepatitis, Autoimmune	0.0187419
Cluster1	isoprenoid biosynthetic process	0.0392283		Cluster19	Rhinitis	0.0187419
Cluster1	renal system process involved in regulation of systemic arterial blood pressure	0.0392283		Cluster19	Immunoglobulin A deficiency (disorder)	0.0189274
Cluster1	embryonic epithelial tube formation	0.0397981		Cluster19	Alopecia Areata	0.0198649
Cluster1	vascular process in circulatory system	0.0397981		Cluster19	Rheumatism	0.0198649
Cluster1	guanosine-containing compound metabolic process	0.0400012		Cluster19	Cytomegalovirus Infections	0.0198649
Cluster1	apoptotic process	0.0404618		Cluster19	Pemphigus	0.0198649
Cluster1	response to interleukin-1	0.0410631		Cluster19	Stevens-Johnson Syndrome	0.0198649
Cluster1	positive regulation of GTPase activity	0.0411733		Cluster19	Pregnancy loss	0.0208635
Cluster1	nucleoside catabolic process	0.0418558		Cluster19	Oral Submucous Fibrosis	0.0218828
Cluster1	epithelial tube formation	0.042218		Cluster19	Autoimmune thyroiditis	0.0239824
Cluster1	regulation of response to cytokine stimulus	0.042218		Cluster19	Inclusion Body Myopathy, Sporadic	0.0239824
Cluster1	cellular response to hormone stimulus	0.042491		Cluster19	Idiopathic Inflammatory Myopathies	0.0243025
Cluster1	positive regulation of metabolic process	0.0425004		Cluster19	Monocytic leukemia	0.0243025
Cluster1	axon guidance	0.0432652		Cluster19	Papillomavirus Infections	0.0243025
Cluster1	sprouting angiogenesis	0.0433164		Cluster19	Icterus	0.0247956
Cluster1	positive regulation of response to external stimulus	0.0434212		Cluster19	Primary sclerosing cholangitis	0.0253336
Cluster1	positive regulation of cyclic nucleotide metabolic process	0.0436712		Cluster19	Rheumatic Fever	0.0307447
Cluster1	cellular component movement	0.0436712		Cluster19	Myositis	0.0313682
Cluster1	regulation of cellular metabolic process	0.0438826		Cluster19	Gestational Diabetes	0.0314862
Cluster1	mesenchymal cell development	0.0442104		Cluster19	Common Variable Immunodeficiency	0.0322368
Cluster1	negative regulation of neuron apoptotic process	0.0442104		Cluster19	Rotting teeth	0.0322368
Cluster1	negative regulation of neuron death	0.0442104		Cluster19	Bullous pemphigoid	0.0329961
Cluster1	regulation of synaptic transmission	0.0442104		Cluster19	Pemphigus Vulgaris	0.0329961
Cluster1	regulation of multicellular organismal development	0.0442899		Cluster19	Iron Overload	0.0337638
Cluster1	regulation of neurological system process	0.0444489		Cluster19	Trachoma	0.0337638
Cluster1	regulation of catabolic process	0.0447634		Cluster19	Diabetes, Autoimmune	0.0353234
Cluster1	regulation of establishment of protein localization	0.0447634		Cluster19	Occupational Diseases	0.0353234
Cluster1	adaptation of signaling pathway	0.0447634		Cluster19	Persistent infection	0.0353234
Cluster1	desensitization of G-protein coupled receptor protein signaling pathway	0.0447634		Cluster19	Spondylarthritis	0.0353234
Cluster1	negative adaptation of signaling pathway	0.0447634		Cluster19	Primary biliary cirrhosis	0.0366748
Cluster1	regulation of dopamine secretion	0.0447634		Cluster19	VITILIGO-ASSOCIATED MULTIPLE AUTOIMMUNE DISEASE SUSCEPTIBILITY 1 (finding)	0.037353
Cluster1	regulation of urine volume	0.0447634		Cluster19	Uveomeningoencephalitic Syndrome	0.037353
Cluster1	startle response	0.0447634		Cluster19	Addison Disease	0.038158
Cluster1	positive regulation of cytokine secretion	0.0447634		Cluster19	Adult type dermatomyositis	0.038158
Cluster1	positive regulation of macromolecule metabolic process	0.0451723		Cluster19	Bronchiectasis	0.039418
Cluster1	regulation of actin filament polymerization	0.0454734		Cluster19	Viremia	0.0406933
Cluster1	heterocycle biosynthetic process	0.0455133		Cluster19	Autoimmune thyroid disease	0.0419835
Cluster1	response to organic nitrogen	0.0455133		Cluster19	Nasopharyngeal Neoplasms	0.0423808
Cluster1	organ morphogenesis	0.0455133		Cluster19	Osteoporosis, Postmenopausal	0.0423808
Cluster1	negative regulation of organelle organization	0.0455133		Cluster19	Chagas Disease	0.0423808
Cluster1	regulation of phosphate metabolic process	0.0456524		Cluster19	Mucocutaneous Lymph Node Syndrome	0.0430861
Cluster1	regulation of phosphorus metabolic process	0.0456524		Cluster19	Hay fever	0.0481373
Cluster1	regulation of Ras GTPase activity	0.0460893		Cluster19	Multiple Sclerosis, Relapsing-Remitting	0.0481373
Cluster1	isoprenoid metabolic process	0.0460893		Cluster2	Acute necrotizing encephalopathy	1.84306e-10
Cluster1	positive regulation of adenylate cyclase activity	0.0460893		Cluster2	Abnormal mitochondria in muscle tissue	2.32445e-10
Cluster1	positive regulation of nucleotide metabolic process	0.0480789		Cluster2	Progressive macrocephaly	2.32445e-10
Cluster1	positive regulation of purine nucleotide metabolic process	0.0480789		Cluster2	NADH:Q(1) Oxidoreductase deficiency	2.53396e-10
Cluster1	synapse organization	0.0480789		Cluster2	Cerebral Edema	2.86978e-10
Cluster10	rRNA catabolic process	3.00312e-11		Cluster2	CSF lactate increased	1.2949e-09
Cluster10	ncRNA catabolic process	3.00312e-11		Cluster2	Pallor of optic disc	2.16512e-09
Cluster10	rRNA metabolic process	3.00312e-11		Cluster2	Impaired exercise tolerance	2.82646e-09
Cluster10	ncRNA metabolic process	5.8284e-09		Cluster2	Brain Edema	1.55297e-08
Cluster10	exonucleolytic nuclear-transcribed mRNA catabolic process involved in deadenylation-dependent decay	8.59888e-09		Cluster2	Comatose	1.55297e-08
Cluster10	nuclear-transcribed mRNA catabolic process, exonucleolytic	8.59888e-09		Cluster2	X-linked dominant	1.55297e-08
Cluster10	rRNA processing	6.79657e-08		Cluster2	Lactic acidemia	4.52158e-08
Cluster10	RNA catabolic process	1.54012e-07		Cluster2	Lethargy	4.52158e-08
Cluster10	nuclear-transcribed mRNA catabolic process, deadenylation-dependent decay	1.80579e-07		Cluster2	Leukodystrophy	6.1533e-08
Cluster10	ribosome biogenesis	3.31789e-07		Cluster2	muscle degeneration	8.33809e-08
Cluster10	ncRNA processing	4.67496e-07		Cluster2	Loss of developmental milestones	8.33809e-08
Cluster10	RNA surveillance	5.1554e-07		Cluster2	Mental deterioration in childhood	8.33809e-08
Cluster10	nuclear-transcribed mRNA catabolic process	1.60012e-06		Cluster2	Neurodevelopmental regression	8.33809e-08
Cluster10	mRNA catabolic process	1.82019e-06		Cluster2	Psychomotor regression	8.33809e-08
Cluster10	ribonucleoprotein complex biogenesis	4.86616e-06		Cluster2	Psychomotor regression beginning in infancy	8.33809e-08
Cluster10	cellular component biogenesis at cellular level	6.29292e-06		Cluster2	Psychomotor regression in infants	8.33809e-08
Cluster10	mRNA metabolic process	6.70069e-06		Cluster2	Psychomotor regression, progressive	8.33809e-08
Cluster10	protein export from nucleus	2.7595e-05		Cluster2	Babinski Reflex	8.33809e-08
Cluster10	RNA processing	4.50256e-05		Cluster2	Blindness, Legal	8.33809e-08
Cluster10	nucleocytoplasmic transport	6.4177e-05		Cluster2	Developmental regression	1.03936e-07
Cluster10	nuclear transport	6.66857e-05		Cluster2	Infratentorial atrophy	1.03936e-07
Cluster10	cellular macromolecule catabolic process	8.19104e-05		Cluster2	Growth delay	1.03985e-07
Cluster10	macromolecule catabolic process	0.000150212		Cluster2	Growth retardation	1.03985e-07
Cluster10	cellular catabolic process	0.000385892		Cluster2	Poor growth	1.03985e-07
Cluster10	gene expression	0.000421104		Cluster2	Very poor growth	1.03985e-07
Cluster10	protein targeting	0.000614635		Cluster2	Acidosis, Lactic	1.07953e-07
Cluster10	catabolic process	0.000777226		Cluster2	Blind Vision	1.28355e-07
Cluster10	RNA metabolic process	0.000840281		Cluster2	Nicotinamide adenine dinucleotide coenzyme Q reductase deficiency	1.91296e-07
Cluster10	nucleic acid metabolic process	0.000842113		Cluster2	Atrophy of cerebellum	2.00715e-07
Cluster10	protein import into nucleus	0.00104098		Cluster2	Muscle Weakness	2.26397e-07
Cluster10	nuclear import	0.00114034		Cluster2	Decreased tendon reflex	2.26397e-07
Cluster10	nuclear export	0.00134284		Cluster2	Cerebellar degeneration	3.25598e-07
Cluster10	cellular macromolecule localization	0.0021386		Cluster2	Vomiting	3.91103e-07
Cluster10	nucleobase-containing compound metabolic process	0.00239406		Cluster2	Highly variable clinical phenotype	4.24207e-07
Cluster10	protein localization to nucleus	0.00239406		Cluster2	Highly variable phenotype and severity	4.24207e-07
Cluster10	intracellular protein transport	0.00278045		Cluster2	Highly variable phenotype, even within families	4.24207e-07
Cluster10	RNA localization	0.00324958		Cluster2	Phenotypic variability	4.24207e-07
Cluster10	cellular nitrogen compound metabolic process	0.00330875		Cluster2	Neurogenic Muscular Atrophy	4.24207e-07
Cluster10	nitrogen compound metabolic process	0.00347434		Cluster2	Neurogenic muscle atrophy, especially in the lower limbs	4.24207e-07
Cluster10	protein import	0.00423127		Cluster2	Skeletal muscle atrophy	4.24207e-07
Cluster10	macromolecule metabolic process	0.0048676		Cluster2	Growth failure	4.35631e-07
Cluster10	cellular protein localization	0.0114204		Cluster2	Respiratory Failure	4.47359e-07
Cluster10	cellular macromolecule metabolic process	0.0120833		Cluster2	Liver Failure	7.86329e-07
Cluster10	cellular component biogenesis	0.0173747		Cluster2	MITOCHONDRIAL COMPLEX I DEFICIENCY	9.22069e-07
Cluster10	protein transport	0.022452		Cluster2	Feeding difficulties in infancy	1.27205e-06
Cluster10	establishment of protein localization	0.0239445		Cluster2	Leigh Disease	1.62485e-06
Cluster10	intracellular transport	0.0246552		Cluster2	Hyperreflexia	1.643e-06
Cluster10	macromolecule localization	0.0291219		Cluster2	Hypoglycemia	2.05776e-06
Cluster10	protein localization to organelle	0.0382267		Cluster2	Blepharoptosis	5.53371e-06
Cluster10	cellular localization	0.0384558		Cluster2	Muscle Spasticity	6.39081e-06
Cluster10	metabolic process	0.0404758		Cluster2	Hypertrophic Cardiomyopathy	7.92788e-06
Cluster10	M phase	0.0489097		Cluster2	Nystagmus	1.09623e-05
Cluster11	localization	0.000676203		Cluster2	Strabismus	1.32547e-05
Cluster11	synapse organization	0.000676203		Cluster2	Failure to gain weight	2.21781e-05
Cluster11	synapse assembly	0.000892043		Cluster2	Sensorineural Hearing Loss (disorder)	2.26994e-05
Cluster11	cellular localization	0.00506999		Cluster2	Pediatric failure to thrive	2.51259e-05
Cluster11	regulation of multicellular organismal process	0.00506999		Cluster2	Cerebellar Ataxia	5.00294e-05
Cluster11	positive regulation of homeostatic process	0.00506999		Cluster2	Global developmental delay	5.00294e-05
Cluster11	protein localization in membrane	0.00506999		Cluster2	Muscle hypotonia	0.000163958
Cluster11	embryonic appendage morphogenesis	0.00996979		Cluster2	Cognitive delay	0.000273936
Cluster11	embryonic limb morphogenesis	0.00996979		Cluster2	Mental and motor retardation	0.000273936
Cluster11	appendage morphogenesis	0.0119901		Cluster2	Seizures	0.000273936
Cluster11	limb morphogenesis	0.0119901		Cluster2	Epilepsy	0.00205302
Cluster11	transport	0.0119901		Cluster2	Autosomal recessive predisposition	0.00815282
Cluster11	appendage development	0.0119901		Cluster20	Prostate carcinoma	0.00428273
Cluster11	limb development	0.0119901		Cluster20	Breast cancer, lobular	0.00428273
Cluster11	establishment of localization	0.0127119		Cluster20	POLYCYSTIC KIDNEY DISEASE 1	0.00663645
Cluster11	generation of neurons	0.0132306		Cluster20	Secondary malignant neoplasm of pancreas	0.00663645
Cluster11	system process	0.0132306		Cluster20	Malignant neoplasm of prostate	0.00663645
Cluster11	maintenance of location	0.0142113		Cluster20	Breast Carcinoma	0.00663645
Cluster11	neurogenesis	0.015051		Cluster20	Adenocarcinoma of lung (disorder)	0.00685552
Cluster11	vesicle-mediated transport	0.0203171		Cluster20	Mild Mental Retardation	0.00685552
Cluster11	regulation of ossification	0.0204359		Cluster20	Malignant neoplasm of breast	0.00686689
Cluster11	nervous system development	0.021433		Cluster20	Precancerous Conditions	0.00686689
Cluster11	transmission of nerve impulse	0.021731		Cluster20	Hepatic methionine adenosyltransferase deficiency	0.00696317
Cluster11	multicellular organismal signaling	0.0223408		Cluster20	Metastasis from malignant tumor of prostate	0.00872446
Cluster11	cell morphogenesis involved in differentiation	0.0223408		Cluster20	Colorectal Cancer	0.00935725
Cluster11	Golgi vesicle transport	0.022861		Cluster20	Metastatic Prostate Carcinoma	0.0106072
Cluster11	axon guidance	0.024601		Cluster20	Neoplasm Metastasis	0.0117111
Cluster11	regulation of nervous system development	0.029018		Cluster20	Hyperparathyroidism, Primary	0.0117111
Cluster11	neurological system process	0.0330178		Cluster20	Oropharyngeal disorders	0.0117233
Cluster11	establishment of localization in cell	0.0353789		Cluster20	Glioblastoma	0.0121713
Cluster11	intracellular transport	0.0353789		Cluster20	Adenocarcinoma of colon	0.0124831
Cluster11	regulation of multicellular organismal development	0.0366179		Cluster20	Cyst	0.0124831
Cluster11	G-protein coupled receptor signaling pathway	0.0367776		Cluster20	Invasive carcinoma of breast	0.0124831
Cluster11	cell morphogenesis	0.0367776		Cluster20	Mammary Neoplasms	0.0125991
Cluster11	regulation of homeostatic process	0.0367776		Cluster20	Neurilemmoma	0.0125991
Cluster11	regulation of ion transport	0.0367776		Cluster20	Secondary malignant neoplasm of lymph node	0.0125991
Cluster11	regulation of cell development	0.0367776		Cluster20	Colorectal Carcinoma	0.0127342
Cluster11	response to external stimulus	0.0395582		Cluster20	Non-Small Cell Lung Carcinoma	0.0138891
Cluster11	positive regulation of multicellular organismal process	0.0395582		Cluster20	Slow progression	0.0141098
Cluster11	axonogenesis	0.0395582		Cluster20	Parathyroid Adenoma	0.0142687
Cluster11	cellular component morphogenesis	0.0408512		Cluster20	Wiskott-Aldrich Syndrome	0.0144357
Cluster11	neuron differentiation	0.041056		Cluster20	Prostatic Neoplasms	0.01626
Cluster11	macromolecule localization	0.0413929		Cluster20	Primary malignant neoplasm of lung	0.0171174
Cluster11	multicellular organismal process	0.0413929		Cluster20	Glioma	0.0184334
Cluster11	cell morphogenesis involved in neuron differentiation	0.0429388		Cluster20	Colorectal Neoplasms	0.0205251
Cluster11	synaptic transmission	0.0429388		Cluster20	Malignant neoplasm of lung	0.0205251
Cluster11	cellular protein localization	0.0429388		Cluster20	Hyperactive behavior	0.0205251
Cluster11	neuron projection morphogenesis	0.0429388		Cluster20	Bladder Neoplasm	0.0205251
Cluster11	cellular macromolecule localization	0.0429388		Cluster20	Malignant neoplasm of urinary bladder	0.0205251
Cluster11	cell development	0.0429388		Cluster20	Malignant tumor of colon	0.0205251
Cluster12	respiratory electron transport chain	1.88163e-08		Cluster20	Muscle hypotonia	0.0205251
Cluster12	electron transport chain	2.35485e-08		Cluster20	Carcinoma of lung	0.0209371
Cluster12	cellular respiration	2.35485e-08		Cluster20	Alzheimer's Disease	0.0217243
Cluster12	energy derivation by oxidation of organic compounds	3.99125e-06		Cluster20	Carcinogenesis	0.0217641
Cluster12	mitochondrial electron transport, ubiquinol to cytochrome c	4.26997e-06		Cluster20	Heart failure	0.0265086
Cluster12	biological adhesion	4.26997e-06		Cluster20	Adenocarcinoma	0.0277323
Cluster12	cell adhesion	4.26997e-06		Cluster20	B-Cell Lymphomas	0.0277323
Cluster12	cell-substrate adhesion	4.26997e-06		Cluster20	Paroxysmal kinesigenic choreoathetosis	0.0277323
Cluster12	generation of precursor metabolites and energy	7.28063e-06		Cluster20	Colon Carcinoma	0.0289253
Cluster12	axon guidance	7.97687e-06		Cluster20	Adenomatous Polyposis Coli	0.031061
Cluster12	cell projection organization	1.19113e-05		Cluster20	Severe mental retardation (I.Q. 20-34)	0.0327651
Cluster12	oxidation-reduction process	1.53297e-05		Cluster20	Short neck	0.0355916
Cluster12	axonogenesis	3.95665e-05		Cluster20	Neoplastic Cell Transformation	0.0355916
Cluster12	cell morphogenesis involved in neuron differentiation	5.77265e-05		Cluster20	Carcinoma of bladder	0.0355916
Cluster12	neuron projection morphogenesis	6.42805e-05		Cluster20	Esophageal Neoplasms	0.0447173
Cluster12	chemotaxis	9.21631e-05		Cluster21	Tauopathies	0.00519152
Cluster12	taxis	9.21631e-05		Cluster21	Distal sensory impairment	0.00519152
Cluster12	neuron projection development	0.000107675		Cluster21	Progressive disorder	0.00519152
Cluster12	cell projection morphogenesis	0.00012526		Cluster21	Hypoplasia of corpus callosum	0.0194636
Cluster12	cell morphogenesis involved in differentiation	0.00012526		Cluster21	Rhabdomyosarcoma, Embryonal	0.0255479
Cluster12	cell part morphogenesis	0.000136252		Cluster21	Autosomal recessive predisposition	0.0258193
Cluster12	integrin-mediated signaling pathway	0.000155923		Cluster21	Steatohepatitis	0.0258193
Cluster12	neuron development	0.000263726		Cluster21	Arthropathy	0.0268391
Cluster12	cell-matrix adhesion	0.000263726		Cluster21	Charcot-Marie-Tooth Disease	0.0268391
Cluster12	aerobic respiration	0.000277327		Cluster21	Neoplastic Cell Transformation	0.0312091
Cluster12	cell-substrate junction assembly	0.000337858		Cluster21	Liver and Intrahepatic Biliary Tract Carcinoma	0.0353594
Cluster12	cell morphogenesis	0.000383002		Cluster21	Cognitive delay	0.038567
Cluster12	locomotion	0.000383002		Cluster21	Mental and motor retardation	0.038567
Cluster12	cellular component morphogenesis	0.000558642		Cluster21	Metabolic Diseases	0.038567
Cluster12	neuron differentiation	0.000567652		Cluster21	Hyperreflexia	0.0458743
Cluster12	cellular component movement	0.000822266		Cluster21	Malignant neoplasm of liver	0.0485107
Cluster12	response to external stimulus	0.000822266		Cluster24	Cortical Dysplasia	0.00361532
Cluster12	cell junction assembly	0.000869003		Cluster24	Nerve Sheath Tumors	0.00361532
Cluster12	cell junction organization	0.0016677		Cluster24	Congenital Hyperinsulinism	0.00361532
Cluster12	ATP synthesis coupled electron transport	0.00186162		Cluster24	neurofibroma	0.00361532
Cluster12	mitochondrial ATP synthesis coupled electron transport	0.00186162		Cluster24	Central neuroblastoma	0.00361532
Cluster12	oxidative phosphorylation	0.00236364		Cluster24	Interstitial lung fibrosis	0.00413255
Cluster12	generation of neurons	0.00275912		Cluster24	Neuroblastoma	0.00418726
Cluster12	cell migration	0.00291434		Cluster24	Neurilemmoma	0.00431822
Cluster12	anatomical structure morphogenesis	0.00334778		Cluster24	Neurofibromatoses	0.00431822
Cluster12	small molecule metabolic process	0.00337246		Cluster24	Gastrointestinal Stromal Tumors	0.00671865
Cluster12	retina development in camera-type eye	0.00341257		Cluster24	Spots on skin	0.0091389
Cluster12	neurogenesis	0.00341257		Cluster24	Secondary malignant neoplasm of bone	0.0091389
Cluster12	cell motility	0.00364238		Cluster24	Secondary malignant neoplasm of liver	0.0091389
Cluster12	localization of cell	0.00364238		Cluster24	Secondary malignant neoplasm of lung	0.0100039
Cluster12	cell development	0.00546631		Cluster24	Colon Carcinoma	0.0108014
Cluster12	cardiovascular system development	0.00613796		Cluster24	DYSFUNCTION - SKIN DISORDERS	0.0122668
Cluster12	circulatory system development	0.00613796		Cluster24	Tobacco Use Disorder	0.016996
Cluster12	regulation of cell adhesion	0.00613796		Cluster24	Cerebellar Ataxia	0.016996
Cluster12	cell projection assembly	0.00668095		Cluster24	Exanthema	0.018573
Cluster12	striated muscle cell differentiation	0.0139027		Cluster24	Alzheimer's Disease	0.018573
Cluster12	camera-type eye development	0.0197193		Cluster24	Secondary malignant neoplasm of lymph node	0.0187145
Cluster12	nervous system development	0.0246027		Cluster24	Osteosarcoma	0.0187145
Cluster12	wound healing	0.0246027		Cluster24	Neurofibromatosis 2	0.0187145
Cluster12	blood vessel development	0.0246027		Cluster24	Sudden Cardiac Death	0.0187145
Cluster12	regulation of cell migration	0.0246027		Cluster24	Astrocytoma	0.0205693
Cluster12	leukocyte migration	0.0252585		Cluster24	Ataxia	0.0236382
Cluster12	eye development	0.0261556		Cluster24	Malignant neoplasm of ovary	0.0236382
Cluster12	anatomical structure development	0.0271695		Cluster24	Malignant Peripheral Nerve Sheath Tumor	0.0271898
Cluster12	regulation of cell motility	0.0277115		Cluster24	Neoplasm Metastasis	0.0277063
Cluster12	vasculature development	0.0277115		Cluster24	Mammary Neoplasms, Experimental	0.0277063
Cluster12	tissue development	0.0277115		Cluster24	Meningioma	0.0277063
Cluster12	exocytosis	0.02799		Cluster24	Infantile onset	0.0277063
Cluster12	striated muscle tissue development	0.0284544		Cluster24	Osteosarcoma of bone	0.0277063
Cluster12	system development	0.0292282		Cluster24	Hyperactive behavior	0.0277063
Cluster12	cell-cell adhesion	0.0293907		Cluster24	Renal fibrosis	0.0277063
Cluster12	response to wounding	0.0303054		Cluster24	Steroid Sulfatase Deficiency Disease	0.0277063
Cluster12	regulation of cellular component movement	0.0304139		Cluster24	Nephroblastoma	0.0277063
Cluster12	muscle tissue development	0.0307713		Cluster24	Malignant tumor of colon	0.0285166
Cluster12	regulation of locomotion	0.0307713		Cluster24	Animal Mammary Neoplasms	0.0285817
Cluster12	muscle cell differentiation	0.0313093		Cluster24	Atrial Premature Complexes	0.0305668
Cluster12	cell differentiation	0.0401812		Cluster24	Ichthyosis, X-Linked	0.0308107
Cluster12	blood coagulation	0.0454985		Cluster24	Brain Neoplasms	0.0308107
Cluster12	coagulation	0.0454985		Cluster24	Adenovirus Infections	0.0308107
Cluster12	hemostasis	0.0458123		Cluster24	Cervical Intraepithelial Neoplasia	0.0308107
Cluster12	cellular developmental process	0.0458123		Cluster24	Lung diseases	0.0338427
Cluster12	actin cytoskeleton organization	0.0458123		Cluster24	Acute kidney injury	0.0338427
Cluster12	multicellular organismal process	0.0458123		Cluster24	Skin Erosion	0.0338427
Cluster12	developmental process	0.0472568		Cluster24	Schizophrenia	0.0345276
Cluster12	cellular component assembly at cellular level	0.0472568		Cluster24	leiomyosarcoma	0.0345276
Cluster12	response to chemical stimulus	0.0486851		Cluster24	Squamous cell carcinoma of tongue	0.0381143
Cluster13	chromosome segregation	3.51188e-15		Cluster24	Nodule	0.0384623
Cluster13	mitosis	7.46505e-14		Cluster24	Tumor Progression	0.0416163
Cluster13	nuclear division	7.46505e-14		Cluster24	Prostatic Neoplasms	0.0416163
Cluster13	M phase of mitotic cell cycle	7.46505e-14		Cluster24	Primary malignant neoplasm of lung	0.0416163
Cluster13	organelle fission	7.8327e-14		Cluster24	Rhabdomyosarcoma	0.0422811
Cluster13	cell division	1.2501e-12		Cluster24	Ovarian Carcinoma	0.0422811
Cluster13	M phase	1.44902e-12		Cluster24	Neoplastic Cell Transformation	0.0429491
Cluster13	mitotic chromosome condensation	9.67102e-12		Cluster24	beta Thalassemia	0.0429491
Cluster13	mitotic sister chromatid segregation	8.20587e-11		Cluster24	Medulloblastoma	0.0429491
Cluster13	mitotic cell cycle	9.36606e-11		Cluster24	Peripheral Neuropathy	0.0452078
Cluster13	sister chromatid segregation	1.17777e-10		Cluster24	Superficial ulcer	0.04667
Cluster13	cell cycle phase	2.42358e-10		Cluster25	Juvenile Myelomonocytic Leukemia	5.17511e-08
Cluster13	chromosome condensation	2.69406e-10		Cluster25	Neoplasm Metastasis	5.17511e-08
Cluster13	sister chromatid cohesion	2.69406e-10		Cluster25	Tumor Progression	7.76854e-08
Cluster13	cell cycle process	1.3974e-09		Cluster25	Liver carcinoma	4.17002e-07
Cluster13	mitotic metaphase/anaphase transition	6.46031e-09		Cluster25	Chronic myeloproliferative disorder	9.98885e-07
Cluster13	cell cycle	1.52837e-08		Cluster25	Adult T-Cell Lymphoma/Leukemia	1.05087e-06
Cluster13	organelle organization	4.68117e-08		Cluster25	Hyperactive behavior	1.97137e-06
Cluster13	DNA packaging	1.06527e-06		Cluster25	Turner Syndrome, Male	2.58419e-06
Cluster13	chromosome organization	1.06527e-06		Cluster25	Noonan Syndrome	3.46175e-06
Cluster13	DNA conformation change	3.89424e-06		Cluster25	Colorectal Carcinoma	3.46175e-06
Cluster13	cellular component organization at cellular level	8.67972e-06		Cluster25	Myeloproliferative disease	3.53572e-06
Cluster13	cellular component organization or biogenesis at cellular level	1.25759e-05		Cluster25	Ewings sarcoma	3.53572e-06
Cluster13	mitotic prometaphase	2.33603e-05		Cluster25	Hematopoietic Neoplasms	4.25946e-06
Cluster13	DNA metabolic process	4.25671e-05		Cluster25	Colorectal Cancer	4.74205e-06
Cluster13	cellular component organization	5.31676e-05		Cluster25	Glioblastoma	6.22249e-06
Cluster13	cellular component organization or biogenesis	7.35373e-05		Cluster25	Acute Promyelocytic Leukemia	1.09973e-05
Cluster13	negative regulation of DNA replication	8.82407e-05		Cluster25	Lymphoma, T-Cell, Cutaneous	1.12519e-05
Cluster13	negative regulation of DNA metabolic process	0.000290487		Cluster25	Glioma	1.12519e-05
Cluster13	M phase of meiotic cell cycle	0.0010845		Cluster25	Myeloid Leukemia	1.16295e-05
Cluster13	meiosis	0.0010845		Cluster25	melanoma	1.20636e-05
Cluster13	regulation of DNA replication	0.001087		Cluster25	Lymphatic Abnormalities	1.20636e-05
Cluster13	meiotic cell cycle	0.00116463		Cluster25	leukemia	1.20636e-05
Cluster13	DNA repair	0.00344477		Cluster25	Malignant neoplasm of lung	1.20636e-05
Cluster13	DNA recombination	0.00381005		Cluster25	Mammary Neoplasms	2.07749e-05
Cluster13	regulation of DNA metabolic process	0.00661331		Cluster25	Breast Carcinoma	2.07817e-05
Cluster13	response to DNA damage stimulus	0.0138058		Cluster25	Lymphoproliferative Disorders	2.43671e-05
Cluster13	cellular process involved in reproduction	0.0288942		Cluster25	Primary malignant neoplasm of lung	2.44914e-05
Cluster14	nuclear-transcribed mRNA catabolic process, nonsense-mediated decay	1.29056e-120		Cluster25	Costello syndrome (disorder)	2.71138e-05
Cluster14	translational termination	7.53311e-108		Cluster25	Adenocarcinoma of lung (disorder)	2.92348e-05
Cluster14	nuclear-transcribed mRNA catabolic process	1.21332e-106		Cluster25	Liver neoplasms	2.92348e-05
Cluster14	mRNA catabolic process	1.70057e-105		Cluster25	Precursor T-Cell Lymphoblastic Leukemia-Lymphoma	2.92348e-05
Cluster14	SRP-dependent cotranslational protein targeting to membrane	1.70057e-105		Cluster25	Isochromosomes	3.5624e-05
Cluster14	viral genome expression	2.14193e-105		Cluster25	Leukemia, Myelocytic, Acute	3.83216e-05
Cluster14	viral transcription	2.14193e-105		Cluster25	Neuroblastoma	3.83216e-05
Cluster14	cotranslational protein targeting to membrane	2.60123e-105		Cluster25	Pectus excavatum	3.83216e-05
Cluster14	establishment of protein localization in endoplasmic reticulum	2.60123e-105		Cluster25	Bleeding tendency	3.83216e-05
Cluster14	protein targeting to ER	2.60123e-105		Cluster25	Prostate carcinoma	4.36206e-05
Cluster14	cellular protein complex disassembly	2.97626e-103		Cluster25	Hepatitis C	4.36206e-05
Cluster14	protein complex disassembly	9.02664e-103		Cluster25	Carcinoma of lung	4.61897e-05
Cluster14	RNA catabolic process	1.77381e-102		Cluster25	Acute leukemia	4.61897e-05
Cluster14	translational elongation	3.9051e-102		Cluster25	Stomach Carcinoma	4.68474e-05
Cluster14	protein localization in endoplasmic reticulum	1.62698e-101		Cluster25	LEOPARD Syndrome	4.70667e-05
Cluster14	cellular macromolecular complex disassembly	7.02686e-96		Cluster25	Triple Negative Breast Neoplasms	5.56511e-05
Cluster14	macromolecular complex disassembly	1.56922e-95		Cluster25	Lymphoma	5.72601e-05
Cluster14	translational initiation	6.12495e-95		Cluster25	Leukemia, T-Cell	6.57389e-05
Cluster14	protein targeting to membrane	2.07193e-93		Cluster25	Venous malformation	8.19483e-05
Cluster14	viral infectious cycle	1.8845e-86		Cluster25	leiomyosarcoma	8.28495e-05
Cluster14	establishment of protein localization to organelle	1.06077e-83		Cluster25	Joint hyperflexibility	8.62956e-05
Cluster14	viral reproductive process	4.60703e-80		Cluster25	Malignant neoplasm of stomach	9.02826e-05
Cluster14	translation	2.79985e-79		Cluster25	Malignant neoplasm of prostate	9.38934e-05
Cluster14	cellular component disassembly at cellular level	4.02929e-77		Cluster25	Acute Erythroblastic Leukemia	9.42496e-05
Cluster14	cellular component disassembly	5.60483e-77		Cluster25	Congenital abnormality of vein	9.42496e-05
Cluster14	cellular macromolecule catabolic process	2.80338e-68		Cluster25	Malignant neoplasm of breast	9.47124e-05
Cluster14	protein targeting	2.60017e-67		Cluster25	Precursor Cell Lymphoblastic Leukemia Lymphoma	9.47124e-05
Cluster14	mRNA metabolic process	9.22942e-67		Cluster25	Hodgkin Disease	9.77741e-05
Cluster14	protein localization to organelle	1.18009e-65		Cluster25	Philadelphia chromosome-positive acute lymphoblastic leukemia	9.86011e-05
Cluster14	macromolecule catabolic process	3.56012e-65		Cluster25	Lung Neoplasms	9.95565e-05
Cluster14	cellular process involved in reproduction	1.21708e-60		Cluster25	Angiosarcoma of Soft Tissue	0.000101962
Cluster14	viral reproduction	4.73609e-59		Cluster25	Malignant neoplasm of pancreas	0.00010213
Cluster14	intracellular protein transport	3.15882e-56		Cluster25	Colon Carcinoma	0.000102389
Cluster14	cellular macromolecular complex subunit organization	1.75286e-54		Cluster25	Malignant tumor of colon	0.000114154
Cluster14	protein complex subunit organization	7.28736e-52		Cluster25	Squamous cell carcinoma of skin	0.000118826
Cluster14	cellular catabolic process	2.31197e-50		Cluster25	B-Cell Lymphomas	0.000121167
Cluster14	intracellular transport	4.818e-50		Cluster25	Central neuroblastoma	0.00014578
Cluster14	catabolic process	6.29417e-47		Cluster25	Pancreatic carcinoma	0.000157173
Cluster14	cellular protein localization	1.0216e-46		Cluster25	Mammary Tumorigenesis	0.000159712
Cluster14	cellular macromolecule localization	1.35395e-46		Cluster25	Pancreatic Neoplasm	0.000161481
Cluster14	macromolecular complex subunit organization	2.05799e-43		Cluster25	Sandal gap	0.000177085
Cluster14	protein transport	4.21907e-42		Cluster25	Atherosclerosis	0.000192347
Cluster14	establishment of localization in cell	9.48309e-42		Cluster25	Cardiac defects	0.000198072
Cluster14	establishment of protein localization	1.41282e-41		Cluster25	Myxoma	0.000206093
Cluster14	macromolecule localization	1.79169e-40		Cluster25	Neurofibromatosis 1	0.000212816
Cluster14	gene expression	2.20051e-40		Cluster25	T-Cell Lymphoma	0.000212816
Cluster14	reproductive process	1.48508e-37		Cluster25	Myelofibrosis due to another disorder	0.000218343
Cluster14	reproduction	1.836e-37		Cluster25	Primary acquired melanosis	0.000218343
Cluster14	cellular localization	3.2796e-37		Cluster25	Monosomy	0.000226884
Cluster14	protein localization	4.12673e-35		Cluster25	Nasopharyngeal carcinoma	0.000230308
Cluster14	cellular macromolecule biosynthetic process	1.25758e-34		Cluster25	Thrombocythemia, Essential	0.000247523
Cluster14	macromolecule biosynthetic process	2.07923e-34		Cluster25	Small cell carcinoma of lung	0.000287786
Cluster14	RNA metabolic process	4.88354e-33		Cluster25	Arteriosclerosis	0.000291784
Cluster14	cellular protein metabolic process	1.17362e-32		Cluster25	Somatic mutation	0.000291784
Cluster14	cellular biosynthetic process	1.12604e-29		Cluster25	stage, pancreatic cancer	0.000296032
Cluster14	nucleic acid metabolic process	3.59939e-29		Cluster25	Precancerous Conditions	0.000296032
Cluster14	biosynthetic process	5.10065e-29		Cluster25	Addictive Behavior	0.00033001
Cluster14	protein metabolic process	9.46848e-29		Cluster25	Metastatic melanoma	0.000338203
Cluster14	RNA biosynthetic process	6.50913e-28		Cluster25	Thymoma	0.000350826
Cluster14	transport	9.98236e-27		Cluster25	Colorectal Neoplasms	0.00036611
Cluster14	establishment of localization	3.76813e-26		Cluster25	Carcinogenesis	0.000375652
Cluster14	nucleobase-containing compound metabolic process	2.01286e-25		Cluster25	Mesenchymal Cell Neoplasm	0.000375652
Cluster14	cellular nitrogen compound metabolic process	4.26028e-24		Cluster25	Severe Combined Immunodeficiency	0.000375652
Cluster14	cellular macromolecule metabolic process	4.72107e-24		Cluster25	Tumor Initiation	0.000375652
Cluster14	nitrogen compound metabolic process	7.11475e-24		Cluster25	Meleda Disease	0.000377146
Cluster14	macromolecule metabolic process	1.03224e-21		Cluster25	Secondary malignant neoplasm of liver	0.000377146
Cluster14	localization	4.17788e-20		Cluster25	Acute lymphocytic leukemia	0.000389548
Cluster14	primary metabolic process	5.07304e-18		Cluster25	Hematologic Neoplasms	0.000393448
Cluster14	cellular metabolic process	5.55277e-17		Cluster25	Leukemia, Myelomonocytic, Chronic	0.000395021
Cluster14	cellular component organization or biogenesis at cellular level	2.41807e-16		Cluster25	Diabetes Mellitus, Non-Insulin-Dependent	0.000412458
Cluster14	cellular component organization at cellular level	2.50498e-16		Cluster25	Tumor Promotion	0.000412458
Cluster14	metabolic process	6.34586e-16		Cluster25	Prostatic Neoplasms	0.000413736
Cluster14	ribosome biogenesis	5.35278e-15		Cluster25	Classical Hodgkin's Lymphoma	0.00046051
Cluster14	ribosomal small subunit biogenesis	3.04655e-14		Cluster25	Immune System Diseases	0.00046051
Cluster14	cellular component organization or biogenesis	3.73904e-14		Cluster25	Orbital separation excessive	0.000460716
Cluster14	cellular component organization	4.22983e-14		Cluster25	Intestinal Pseudo-Obstruction	0.000460716
Cluster14	rRNA processing	3.22351e-13		Cluster25	Invasive Carcinoma	0.000464584
Cluster14	rRNA metabolic process	6.66283e-13		Cluster25	Refractory cancer	0.000464584
Cluster14	ribonucleoprotein complex biogenesis	3.10829e-11		Cluster25	Myeloid Leukemia, Chronic	0.000480365
Cluster14	cellular component biogenesis at cellular level	7.4315e-11		Cluster25	Non-Small Cell Lung Carcinoma	0.000489686
Cluster14	ncRNA processing	8.16791e-11		Cluster25	Astrocytoma	0.000496673
Cluster14	ncRNA metabolic process	7.83208e-09		Cluster25	Cardio-facio-cutaneous syndrome	0.000559457
Cluster14	ribosomal large subunit biogenesis	6.18472e-08		Cluster25	Cherubism	0.000559457
Cluster14	maturation of SSU-rRNA	6.78379e-07		Cluster25	Core binding factor acute myeloid leukemia	0.000559457
Cluster14	regulation of translation	6.0077e-06		Cluster25	Human Papillomavirus Positive Oropharyngeal Squamous Cell Carcinoma	0.000559457
Cluster14	maturation of SSU-rRNA from tricistronic rRNA transcript (SSU-rRNA, 5.8S rRNA, LSU-rRNA)	3.99687e-05		Cluster25	Anoxia	0.000559457
Cluster14	RNA processing	5.80512e-05		Cluster25	Chronic eosinophilic leukemia	0.000595455
Cluster14	RNA transport	6.43485e-05		Cluster25	Chordoma	0.000645752
Cluster14	establishment of RNA localization	6.43485e-05		Cluster25	Diabetic Nephropathy	0.000663568
Cluster14	nucleic acid transport	6.43485e-05		Cluster25	Ependymoma	0.000663568
Cluster14	RNA localization	9.53312e-05		Cluster25	Aplasia/Hypoplasia of the abdominal wall musculature	0.000689377
Cluster14	nucleobase-containing compound transport	0.000100612		Cluster25	Mesothelioma	0.000717263
Cluster14	RNA export from nucleus	0.000135917		Cluster25	Luminal B Breast Carcinoma	0.00072058
Cluster14	mRNA transport	0.000192484		Cluster25	Colonic Neoplasms	0.000759429
Cluster14	ribosome assembly	0.000293984		Cluster25	Diabetes	0.000827053
Cluster14	nuclear export	0.000631127		Cluster25	Frontal bossing	0.000827053
Cluster14	mRNA export from nucleus	0.000741381		Cluster25	Kaposi Sarcoma	0.000854692
Cluster14	posttranscriptional regulation of gene expression	0.00098045		Cluster25	Ovarian Carcinoma	0.000891579
Cluster14	nucleocytoplasmic transport	0.0068703		Cluster25	Polycythemia Vera	0.000891579
Cluster14	nuclear transport	0.00751832		Cluster25	Rous Sarcoma	0.000953668
Cluster14	cellular component biogenesis	0.0109529		Cluster25	Acquired cubitus valgus	0.000992161
Cluster14	negative regulation of translation	0.0186224		Cluster25	Pulmonary Valve Stenosis	0.000992161
Cluster14	cellular process	0.0195314		Cluster25	LATERAL MENINGOCELE SYNDROME	0.00101957
Cluster14	erythrocyte homeostasis	0.0298098		Cluster25	LIMB-MAMMARY SYNDROME	0.00101957
Cluster15	mitochondrial membrane organization	4.7174e-06		Cluster25	Leukocyte adhesion deficiency type 1	0.00101957
Cluster15	mitochondrion organization	0.000334676		Cluster25	Leukemogenesis	0.00108696
Cluster15	cellular membrane organization	0.00147841		Cluster25	Capillary malformation (disorder)	0.00116041
Cluster15	membrane organization	0.00147841		Cluster25	Carcinoma ex pleomorphic adenoma	0.00116041
Cluster16	chromatin organization	2.88191e-73		Cluster25	Acquired scoliosis	0.00117038
Cluster16	chromatin modification	8.44492e-70		Cluster25	Ductal Breast Carcinoma	0.00117038
Cluster16	chromosome organization	1.2626e-69		Cluster25	Myelofibrosis	0.00117038
Cluster16	regulation of transcription, DNA-dependent	2.38499e-40		Cluster25	Papilloma	0.00119583
Cluster16	regulation of RNA biosynthetic process	3.98178e-40		Cluster25	Tuberous Sclerosis	0.0012328
Cluster16	regulation of RNA metabolic process	2.74659e-39		Cluster25	Tobacco Use Disorder	0.00127925
Cluster16	transcription, DNA-dependent	2.65986e-38		Cluster25	Anaplastic large B-cell lymphoma	0.00133221
Cluster16	organelle organization	6.88789e-37		Cluster25	Hamartoma Syndrome, Multiple	0.00133957
Cluster16	regulation of cellular macromolecule biosynthetic process	1.26713e-36		Cluster25	Vaccinia	0.00133957
Cluster16	histone modification	1.75075e-36		Cluster25	Anaplastic astrocytoma	0.00145577
Cluster16	RNA biosynthetic process	2.19752e-36		Cluster25	Malignant neoplasm of nasopharynx	0.00149507
Cluster16	covalent chromatin modification	3.04599e-36		Cluster25	Adenocarcinoma	0.00149507
Cluster16	regulation of cellular biosynthetic process	5.11025e-36		Cluster25	Congenital vascular anomaly	0.00149507
Cluster16	regulation of macromolecule biosynthetic process	8.10511e-36		Cluster25	Overlap syndrome	0.00149507
Cluster16	regulation of biosynthetic process	1.20428e-35		Cluster25	Pseudomyxoma Peritonei	0.00149507
Cluster16	regulation of gene expression	4.592e-35		Cluster25	Vascular anomaly	0.00149507
Cluster16	regulation of nucleobase-containing compound metabolic process	1.10713e-34		Cluster25	Downward slant of palpebral fissure	0.00151849
Cluster16	regulation of nitrogen compound metabolic process	1.42768e-34		Cluster25	Renal Cell Carcinoma	0.00153009
Cluster16	chromatin remodeling	3.12065e-31		Cluster25	Ki-1+ Anaplastic Large Cell Lymphoma	0.00155385
Cluster16	cellular macromolecule biosynthetic process	4.01942e-30		Cluster25	Medullary carcinoma of thyroid	0.00159891
Cluster16	nucleic acid metabolic process	4.6489e-30		Cluster25	Hyperinsulinism	0.00167756
Cluster16	macromolecule biosynthetic process	6.58525e-30		Cluster25	Joint laxity	0.00180939
Cluster16	peptidyl-lysine modification	2.47557e-28		Cluster25	Hypertensive disease	0.00193741
Cluster16	RNA metabolic process	6.04737e-28		Cluster25	Tumor Angiogenesis	0.00193741
Cluster16	regulation of macromolecule metabolic process	1.29014e-26		Cluster25	Leukemia, Mast-Cell	0.00193741
Cluster16	peptidyl-lysine acetylation	1.28842e-25		Cluster25	Muscular Dystrophy, Emery-Dreifuss	0.00193741
Cluster16	cellular biosynthetic process	1.43465e-25		Cluster25	Pilocytic Astrocytoma	0.00202813
Cluster16	nucleobase-containing compound metabolic process	1.66801e-25		Cluster25	MYELODYSPLASTIC SYNDROME	0.00211986
Cluster16	biosynthetic process	7.6266e-25		Cluster25	Medulloblastoma	0.00211986
Cluster16	regulation of primary metabolic process	1.27766e-24		Cluster25	Hepatocarcinogenesis	0.00211986
Cluster16	histone acetylation	1.27766e-24		Cluster25	Obesity	0.00211986
Cluster16	internal peptidyl-lysine acetylation	1.80879e-24		Cluster25	Tumor necrosis	0.00211986
Cluster16	protein acetylation	2.47201e-24		Cluster25	Coarse hair	0.00211986
Cluster16	internal protein amino acid acetylation	2.47201e-24		Cluster25	Increased gastric cancer	0.00211986
Cluster16	regulation of cellular metabolic process	4.28608e-24		Cluster25	Rough hair texture	0.00211986
Cluster16	cellular nitrogen compound metabolic process	5.55725e-24		Cluster25	Primary Glioblastoma	0.00211986
Cluster16	gene expression	5.85957e-24		Cluster25	Primary Myelofibrosis	0.00213145
Cluster16	cellular component organization at cellular level	9.96935e-24		Cluster25	Anaplastic thyroid carcinoma	0.00229406
Cluster16	nitrogen compound metabolic process	9.96935e-24		Cluster25	Mastocytosis	0.00242896
Cluster16	protein acylation	1.92176e-23		Cluster25	Familial Alzheimer Disease (FAD)	0.00244231
Cluster16	cellular component organization or biogenesis at cellular level	2.00803e-23		Cluster25	Growth Disorders	0.00258648
Cluster16	regulation of metabolic process	2.19987e-21		Cluster25	Urticaria	0.00280531
Cluster16	chromatin assembly or disassembly	1.05865e-20		Cluster25	Idiopathic pulmonary arterial hypertension	0.00290423
Cluster16	cellular macromolecule metabolic process	3.77468e-20		Cluster25	Isolated cases	0.00290423
Cluster16	cellular component organization	5.24742e-19		Cluster25	Mastocytosis, Systemic	0.00290423
Cluster16	cellular component organization or biogenesis	9.01206e-19		Cluster25	Phyllodes Tumor	0.00290423
Cluster16	protein-DNA complex subunit organization	1.8052e-18		Cluster25	Squamous cell carcinoma	0.00293808
Cluster16	macromolecule metabolic process	1.73161e-17		Cluster25	Hypereosinophilia	0.00293808
Cluster16	nucleosome organization	2.9965e-17		Cluster25	Stage II Colon Cancer AJCC v7	0.00293808
Cluster16	regulation of transcription from RNA polymerase II promoter	5.9296e-17		Cluster25	Diabetes Mellitus	0.00293808
Cluster16	negative regulation of transcription, DNA-dependent	1.31231e-16		Cluster25	Malignant lymphoma, lymphocytic, intermediate differentiation, diffuse	0.00307407
Cluster16	negative regulation of RNA metabolic process	3.89058e-16		Cluster25	Persistent embryonic structure	0.00317648
Cluster16	negative regulation of nitrogen compound metabolic process	6.45782e-16		Cluster25	HIV Infections	0.00318835
Cluster16	negative regulation of gene expression	8.659e-16		Cluster25	Excess nuchal skin	0.00318835
Cluster16	negative regulation of cellular macromolecule biosynthetic process	1.83769e-15		Cluster25	Mediastinal (Thymic) Large B-Cell Lymphoma	0.00318835
Cluster16	negative regulation of nucleobase-containing compound metabolic process	3.04189e-15		Cluster25	Neck webbing	0.00318835
Cluster16	negative regulation of cellular biosynthetic process	5.7858e-15		Cluster25	Stage II Colon Cancer	0.00318835
Cluster16	negative regulation of macromolecule biosynthetic process	6.14189e-15		Cluster25	Curvature of spine	0.00323031
Cluster16	chromatin disassembly	8.25767e-15		Cluster25	Heart Diseases	0.00325486
Cluster16	nucleosome disassembly	8.25767e-15		Cluster25	Malignant neoplasm of ovary	0.00347283
Cluster16	protein-DNA complex disassembly	8.25767e-15		Cluster25	Autosomal Recessive Polycystic Kidney Disease	0.00348792
Cluster16	negative regulation of biosynthetic process	9.62987e-15		Cluster25	ESTROGEN RESISTANCE	0.00348792
Cluster16	peptidyl-amino acid modification	6.09478e-14		Cluster25	Squamous cell carcinoma of lung	0.00348792
Cluster16	cellular metabolic process	4.74803e-13		Cluster25	Uterine Fibroids	0.00349765
Cluster16	histone H4 acetylation	7.35335e-13		Cluster25	Byzanthine arch palate	0.00357451
Cluster16	primary metabolic process	9.95142e-13		Cluster25	Brachydactyly	0.00359133
Cluster16	positive regulation of gene expression	1.91713e-12		Cluster25	Abnormality of the skeletal system	0.00363852
Cluster16	positive regulation of transcription, DNA-dependent	2.4851e-12		Cluster25	Range of joint movement increased	0.00379292
Cluster16	DNA metabolic process	2.61047e-12		Cluster25	Short neck	0.00403617
Cluster16	positive regulation of RNA metabolic process	1.49928e-11		Cluster25	Malignant Fibrous Histiocytoma	0.00406377
Cluster16	histone H2A acetylation	1.52842e-11		Cluster25	Primary Lesion	0.00416316
Cluster16	negative regulation of cellular metabolic process	2.02628e-11		Cluster25	solid tumor	0.00416625
Cluster16	histone lysine methylation	3.10709e-11		Cluster25	Pheochromocytoma	0.00419365
Cluster16	negative regulation of macromolecule metabolic process	3.74284e-11		Cluster25	Diabetes Mellitus, Insulin-Dependent	0.00428144
Cluster16	positive regulation of macromolecule biosynthetic process	4.53015e-11		Cluster25	Gastrointestinal Stromal Tumors	0.00450125
Cluster16	histone H3 acetylation	6.26379e-11		Cluster25	Congenital diaphragmatic hernia	0.00470235
Cluster16	negative regulation of metabolic process	7.523e-11		Cluster25	Viremia	0.00470235
Cluster16	metabolic process	1.53369e-10		Cluster25	Congenital chromosomal disease	0.00486616
Cluster16	positive regulation of nucleobase-containing compound metabolic process	1.53369e-10		Cluster25	Arteriovenous fistula	0.00486616
Cluster16	regulation of gene expression, epigenetic	1.61728e-10		Cluster25	Coronary Arteriosclerosis	0.00486616
Cluster16	DNA conformation change	2.20031e-10		Cluster25	Neurofibromatoses	0.00486616
Cluster16	positive regulation of nitrogen compound metabolic process	2.82661e-10		Cluster25	pediatric acute myeloblastic leukemia	0.00486616
Cluster16	macromolecule methylation	3.08711e-10		Cluster25	Metastasis from malignant tumor of prostate	0.00486616
Cluster16	methylation	4.49151e-10		Cluster25	IMMUNE SUPPRESSION	0.00510429
Cluster16	positive regulation of biosynthetic process	5.13447e-10		Cluster25	Lymphoid leukemia	0.00513226
Cluster16	macromolecule modification	6.24211e-10		Cluster25	Wide spaced nipples	0.00523716
Cluster16	negative regulation of transcription from RNA polymerase II promoter	9.14664e-10		Cluster25	Down Syndrome	0.00526942
Cluster16	histone methylation	1.07567e-09		Cluster25	Thyroid Neoplasm	0.00526942
Cluster16	positive regulation of cellular biosynthetic process	1.20077e-09		Cluster25	Cancer of Nasopharynx	0.0052767
Cluster16	regulation of cellular process	5.75604e-09		Cluster25	Hyperglycemia	0.00531271
Cluster16	cellular protein modification process	5.9539e-09		Cluster25	synovial sarcoma	0.00531271
Cluster16	protein modification process	5.9539e-09		Cluster25	Cryptorchidism	0.00552759
Cluster16	protein alkylation	1.40836e-08		Cluster25	Atypical teratoid/rhabdoid tumor	0.00557072
Cluster16	protein methylation	1.40836e-08		Cluster25	Sezary Syndrome	0.00562364
Cluster16	biological regulation	4.35807e-08		Cluster25	ovarian neoplasm	0.00568865
Cluster16	DNA packaging	7.80475e-08		Cluster25	Noninfiltrating Intraductal Carcinoma	0.00570847
Cluster16	regulation of biological process	8.83216e-08		Cluster25	Hemangiosarcoma	0.00597152
Cluster16	protein-DNA complex assembly	1.43118e-07		Cluster25	Burkitt Lymphoma	0.00597152
Cluster16	chromatin assembly	4.52785e-07		Cluster25	Exanthema	0.00597152
Cluster16	positive regulation of macromolecule metabolic process	1.00988e-06		Cluster25	Hereditary gingival fibromatosis	0.00623071
Cluster16	nucleosome assembly	1.90208e-06		Cluster25	Ataxia Telangiectasia	0.00630265
Cluster16	histone deacetylation	2.17567e-06		Cluster25	Carcinoma of larynx	0.00631477
Cluster16	positive regulation of metabolic process	2.60933e-06		Cluster25	Anti-Glomerular Basement Membrane Disease	0.00631477
Cluster16	DNA alkylation	4.11573e-06		Cluster25	Rhabdoid Tumor of the Kidney	0.00631477
Cluster16	DNA methylation	4.11573e-06		Cluster25	Syndactyly of the toes	0.00631477
Cluster16	histone H3-K4 methylation	4.23618e-06		Cluster25	Prominent eyes	0.00634339
Cluster16	positive regulation of cellular metabolic process	4.23618e-06		Cluster25	Prominent globes	0.00634339
Cluster16	cellular macromolecular complex subunit organization	6.54233e-06		Cluster25	Protruding eyes	0.00634339
Cluster16	cellular protein metabolic process	7.21212e-06		Cluster25	Metastatic malignant neoplasm to brain	0.00636349
Cluster16	protein deacetylation	9.27817e-06		Cluster25	Metastatic Prostate Carcinoma	0.00639361
Cluster16	protein deacylation	9.27817e-06		Cluster25	Neurilemmoma	0.00654513
Cluster16	chromatin silencing at rDNA	1.18333e-05		Cluster25	Fetal Alcohol Syndrome	0.00683941
Cluster16	ATP-dependent chromatin remodeling	1.18333e-05		Cluster25	Mycobacterium Infections	0.00683941
Cluster16	cellular macromolecular complex disassembly	2.14895e-05		Cluster25	Rhabdomyosarcoma	0.00683941
Cluster16	macromolecular complex disassembly	2.3348e-05		Cluster25	Glioblastoma Multiforme	0.00683941
Cluster16	interspecies interaction between organisms	2.48248e-05		Cluster25	Fibrosarcoma	0.00683941
Cluster16	DNA repair	2.7596e-05		Cluster25	Syndactyly of fingers	0.00708154
Cluster16	chromatin silencing	2.79009e-05		Cluster25	androgen independent prostate cancer	0.00708154
Cluster16	response to DNA damage stimulus	4.10752e-05		Cluster25	Malignant neoplasm of liver	0.00731098
Cluster16	Notch signaling pathway	4.282e-05		Cluster25	Arthritis, Experimental	0.00733802
Cluster16	gene silencing	4.56579e-05		Cluster25	Exophthalmos	0.00733802
Cluster16	negative regulation of cellular process	5.81087e-05		Cluster25	Secondary malignant neoplasm of lung	0.00734016
Cluster16	negative regulation of gene expression, epigenetic	8.35404e-05		Cluster25	Ductal Carcinoma	0.00737981
Cluster16	histone H4-K5 acetylation	9.5397e-05		Cluster25	Low posterior hairline	0.00737981
Cluster16	histone H4-K8 acetylation	9.5397e-05		Cluster25	Attention deficit hyperactivity disorder	0.00737981
Cluster16	DNA modification	0.000188383		Cluster25	Decreased projection of midface	0.00737981
Cluster16	chromatin-mediated maintenance of transcription	0.000190901		Cluster25	Hypotrophic midface	0.00737981
Cluster16	histone H4-K16 acetylation	0.000196806		Cluster25	Laryngeal Squamous Cell Carcinoma	0.00737981
Cluster16	positive regulation of transcription from RNA polymerase II promoter	0.000311105		Cluster25	Midface retrusion	0.00737981
Cluster16	protein metabolic process	0.000325949		Cluster25	Rhabdomyosarcoma, Embryonal	0.00737981
Cluster16	negative regulation of biological process	0.000353889		Cluster25	Small midface	0.00737981
Cluster16	N-terminal protein amino acid acetylation	0.000362964		Cluster25	Osteoporosis	0.00737981
Cluster16	negative regulation of histone methylation	0.000622909		Cluster25	Ventricular Septal Defects	0.00741647
Cluster16	regulation of androgen receptor signaling pathway	0.000755312		Cluster25	Squamous cell carcinoma of the head and neck	0.00767133
Cluster16	macromolecular complex subunit organization	0.00082009		Cluster25	Myeloid neoplasm	0.00774077
Cluster16	cellular component disassembly at cellular level	0.000998138		Cluster25	Vascular Diseases	0.00800732
Cluster16	cellular component disassembly	0.00103778		Cluster25	Intestinal Neoplasms	0.00808345
Cluster16	N-terminal protein amino acid modification	0.0019715		Cluster25	Multiple Myeloma	0.00810252
Cluster16	positive regulation of gene expression, epigenetic	0.0019715		Cluster25	Abetalipoproteinemia	0.00821807
Cluster16	DNA duplex unwinding	0.00232763		Cluster25	Aplasia Cutis Congenita	0.0084819
Cluster16	DNA geometric change	0.00271694		Cluster25	Colorectal cancer metastatic	0.0084819
Cluster16	modulation by host of symbiont transcription	0.00340663		Cluster25	Influenza	0.0084819
Cluster16	modulation by host of viral transcription	0.00340663		Cluster25	Asthma	0.0084819
Cluster16	peptidyl-lysine methylation	0.00340663		Cluster25	Mixed Salivary Gland Tumor	0.00848381
Cluster16	regulation of histone modification	0.00380927		Cluster25	Congenital pectus carinatum	0.00861555
Cluster16	modulation of transcription in other organism involved in symbiotic interaction	0.0043162		Cluster25	Pulmonary Stenosis	0.00861555
Cluster16	positive regulation of histone modification	0.00465309		Cluster25	Heartburn	0.00871693
Cluster16	multicellular organismal development	0.00478937		Cluster25	Waldenstrom Macroglobulinemia	0.00871693
Cluster16	cellular response to stress	0.00545002		Cluster25	Cholangiocarcinoma	0.00871693
Cluster16	regulation of chromosome organization	0.00683831		Cluster25	Secondary malignant neoplasm of lymph node	0.00881194
Cluster16	DNA recombination	0.00697757		Cluster25	Glucocorticoid Receptor Deficiency	0.00905147
Cluster16	regulation of neural precursor cell proliferation	0.00737358		Cluster25	Invasive Lobular Breast Carcinoma	0.00905147
Cluster16	regulation of histone methylation	0.00778171		Cluster25	Malignant Pleural Mesothelioma	0.00905342
Cluster16	regulation of growth	0.00851109		Cluster25	Lip and Oral Cavity Carcinoma	0.00905342
Cluster16	regulation of intracellular steroid hormone receptor signaling pathway	0.00902349		Cluster25	Keloid	0.00920268
Cluster16	DNA damage response, signal transduction by p53 class mediator resulting in induction of apoptosis	0.00909967		Cluster25	Hepatic methionine adenosyltransferase deficiency	0.00927196
Cluster16	negative regulation of histone modification	0.00909967		Cluster25	Cancer of Head and Neck	0.00929362
Cluster16	nervous system development	0.00930843		Cluster25	Bulging forehead	0.00946348
Cluster16	anatomical structure development	0.00988696		Cluster25	Prominent forehead	0.00946348
Cluster16	modification by host of symbiont morphology or physiology	0.0105883		Cluster25	Malignant neoplasm of mouth	0.00971167
Cluster16	positive regulation of chromosome organization	0.0106869		Cluster25	Hepatitis B	0.00978522
Cluster16	developmental process	0.0109995		Cluster25	Concave bridge of nose	0.00978522
Cluster16	androgen receptor signaling pathway	0.0128213		Cluster25	Depressed nasal bridge	0.00978522
Cluster16	intracellular steroid hormone receptor signaling pathway	0.0134397		Cluster25	Depressed nasal root/bridge	0.00978522
Cluster16	CenH3-containing nucleosome assembly at centromere	0.0138402		Cluster25	Plasmacytoma	0.00978522
Cluster16	DNA replication-independent nucleosome assembly	0.0138402		Cluster25	Autoimmune arthritis	0.00981695
Cluster16	DNA replication-independent nucleosome organization	0.0138402		Cluster25	Mammary Carcinoma, Human	0.00981695
Cluster16	DNA replication	0.0145285		Cluster25	X-linked agammaglobulinemia	0.00981695
Cluster16	embryo development	0.0151976		Cluster25	Congenital Abnormality	0.0102039
Cluster16	chromatin remodeling at centromere	0.0155264		Cluster25	Triangular face	0.0104088
Cluster16	interaction with symbiont	0.0155264		Cluster25	Stomach Neoplasms	0.0105861
Cluster16	embryonic appendage morphogenesis	0.0155264		Cluster25	Malignant Peripheral Nerve Sheath Tumor	0.0107615
Cluster16	embryonic limb morphogenesis	0.0155264		Cluster25	Neuroendocrine Tumors	0.0108153
Cluster16	DNA-dependent transcription, initiation	0.0163102		Cluster25	FANCONI ANEMIA, COMPLEMENTATION GROUP A (disorder)	0.0112997
Cluster16	cellular response to oxidative stress	0.0173249		Cluster25	Adenoviral infections	0.0115724
Cluster16	histone exchange	0.0173249		Cluster25	Hypertrophic disorder of skin, unspecified	0.0115724
Cluster16	negative regulation of cell differentiation	0.0187493		Cluster25	Uranostaphyloschisis	0.0118958
Cluster16	signal transduction by p53 class mediator resulting in induction of apoptosis	0.0219876		Cluster25	Paroxysmal kinesigenic choreoathetosis	0.0119202
Cluster16	cellular macromolecular complex assembly	0.0222406		Cluster25	Osteopenia	0.0119202
Cluster16	embryonic digit morphogenesis	0.0244181		Cluster25	Lymphoma, Follicular	0.0124234
Cluster16	double-strand break repair	0.0252888		Cluster25	Bladder Neoplasm	0.0124347
Cluster16	stem cell differentiation	0.0280109		Cluster25	Osteosarcoma	0.0124856
Cluster16	transcription from RNA polymerase II promoter	0.0288633		Cluster25	Candidiasis	0.012596
Cluster16	appendage morphogenesis	0.0321832		Cluster25	Hypocholesterolemia	0.012596
Cluster16	limb morphogenesis	0.0321832		Cluster25	Metastatic Renal Cell Cancer	0.012596
Cluster16	forebrain development	0.034981		Cluster25	Oropharyngeal disorders	0.012596
Cluster16	appendage development	0.034981		Cluster25	Scoliosis, unspecified	0.012596
Cluster16	limb development	0.034981		Cluster25	Brain Neoplasms	0.012617
Cluster16	in utero embryonic development	0.0360771		Cluster25	Schizophrenia	0.0127491
Cluster16	positive regulation of cellular process	0.0387508		Cluster25	Carcinoma breast stage IV	0.0127491
Cluster16	negative regulation of developmental process	0.0398059		Cluster25	Angle class 2 malocclusion	0.0130602
Cluster16	cellular process	0.0402819		Cluster25	Angle class 3 malocclusion	0.0130602
Cluster16	negative regulation of chromosome organization	0.0412553		Cluster25	Dysplastic Nevus	0.0130602
Cluster16	regulation of smoothened signaling pathway	0.0412553		Cluster25	Posteriorly rotated ear	0.0130602
Cluster16	cellular response to hydrogen peroxide	0.0447606		Cluster25	Traditional Serrated Adenoma	0.0136262
Cluster16	stem cell development	0.0460113		Cluster25	Colitis	0.0136518
Cluster16	DNA damage response, signal transduction resulting in induction of apoptosis	0.0481678		Cluster25	Congenital arteriovenous malformation	0.0136518
Cluster16	positive regulation of viral reproduction	0.0482001		Cluster25	Nerve Sheath Tumors	0.0136518
Cluster17	embryonic epithelial tube formation	0.000991144		Cluster25	Renal fibrosis	0.0138679
Cluster17	epithelial tube formation	0.000991144		Cluster25	Recurrent respiratory infections	0.013914
Cluster17	regulation of signaling	0.000991144		Cluster25	Hamartoma	0.0142545
Cluster17	regulation of catabolic process	0.000991144		Cluster25	Lipoma	0.0142545
Cluster17	positive regulation of cellular component organization	0.000991144		Cluster25	Encephalitis, St. Louis	0.014289
Cluster17	tube formation	0.000991144		Cluster25	Aortic Aneurysm, Abdominal	0.0147122
Cluster17	regulation of localization	0.0011034		Cluster25	tumor vasculature	0.0147122
Cluster17	regulation of transport	0.00116705		Cluster25	neurofibroma	0.0148681
Cluster17	morphogenesis of embryonic epithelium	0.00116705		Cluster25	Diffuse Large B-Cell Lymphoma	0.0154604
Cluster17	regulation of cell communication	0.00169434		Cluster25	Malocclusion	0.0155826
Cluster17	central nervous system development	0.00299618		Cluster25	Choriocarcinoma	0.0157261
Cluster17	dorsal/ventral pattern formation	0.00299618		Cluster25	Refractory anemias	0.0157261
Cluster17	neural tube formation	0.00299618		Cluster25	Lupus Erythematosus, Systemic	0.0158908
Cluster17	nervous system development	0.00299618		Cluster25	Pituitary Neoplasms	0.0159627
Cluster17	positive regulation of cell development	0.00340901		Cluster25	Lymphangioleiomyomatosis	0.0161733
Cluster17	regulation of cellular component organization	0.00343044		Cluster25	Chronic Lymphocytic Leukemia	0.0162403
Cluster17	regulation of protein catabolic process	0.00348379		Cluster25	Impaired glucose tolerance	0.0168288
Cluster17	negative regulation of epithelial cell proliferation	0.00348379		Cluster25	Rheumatoid Arthritis	0.0169895
Cluster17	regulation of signal transduction	0.00431964		Cluster25	Helicobacter pylori (H. pylori) infection in conditions classified elsewhere and of unspecified site	0.0170755
Cluster17	regulation of cell morphogenesis involved in differentiation	0.00527485		Cluster25	Delayed bone age	0.0173455
Cluster17	regulation of microtubule-based process	0.00557484		Cluster25	Polymicrogyria	0.0175253
Cluster17	positive regulation of protein complex assembly	0.00560385		Cluster25	Primary immune deficiency disorder	0.0175253
Cluster17	negative regulation of Wnt receptor signaling pathway	0.00654451		Cluster25	Human immunodeficiency virus (HIV) II infection category B1	0.0176387
Cluster17	brain development	0.00730175		Cluster25	Dwarfism	0.0176387
Cluster17	epithelial to mesenchymal transition	0.00730175		Cluster25	Fanconi Anemia	0.0181854
Cluster17	epithelial tube morphogenesis	0.00730175		Cluster25	Gastrointestinal Hemorrhage	0.0181929
Cluster17	positive regulation of neurogenesis	0.00734493		Cluster25	Infection	0.0182627
Cluster17	regulation of epithelial cell proliferation	0.00734493		Cluster25	Endometrial Carcinoma	0.0187767
Cluster17	regulation of generation of precursor metabolites and energy	0.00734493		Cluster25	Precursor B-cell lymphoblastic leukemia	0.018813
Cluster17	neural tube development	0.00734493		Cluster25	Spots on skin	0.0190201
Cluster17	regulation of neurological system process	0.00734493		Cluster25	Arthritis	0.0192859
Cluster17	negative regulation of signaling	0.00734493		Cluster25	Recurrent tumor	0.0192859
Cluster17	negative regulation of cell communication	0.00734493		Cluster25	Gastrointestinal Carcinoid Tumor	0.0193975
Cluster17	embryo development ending in birth or egg hatching	0.00839406		Cluster25	Mucoepidermoid Carcinoma	0.0195572
Cluster17	regulation of cell projection organization	0.00886177		Cluster25	Broad flat nasal bridge	0.0196902
Cluster17	signal transduction	0.00886177		Cluster25	Nasal bridge wide	0.0196902
Cluster17	negative regulation of molecular function	0.00886177		Cluster25	Liver and Intrahepatic Biliary Tract Carcinoma	0.0196902
Cluster17	negative regulation of phosphate metabolic process	0.00886177		Cluster25	Malignant neoplasm of endometrium	0.0199216
Cluster17	negative regulation of phosphorus metabolic process	0.00886177		Cluster25	Thrombocytopenia	0.0200424
Cluster17	positive regulation of cell projection organization	0.00886177		Cluster25	Uterine Corpus Cancer	0.0200911
Cluster17	regulation of biological quality	0.00952842		Cluster25	Protein Deficiency	0.0200911
Cluster17	neural tube closure	0.00952842		Cluster25	Patent ductus arteriosus	0.0203023
Cluster17	signaling	0.00952842		Cluster25	Insulin Resistance	0.0206832
Cluster17	heart development	0.00952842		Cluster25	Retinoblastoma	0.0206832
Cluster17	regulation of transferase activity	0.00952842		Cluster25	Transitional cell carcinoma of bladder	0.0206832
Cluster17	regulation of anti-apoptosis	0.00952842		Cluster25	Testicular Germ Cell Tumor	0.0206832
Cluster17	tube closure	0.00952842		Cluster25	Uveomeningoencephalitic Syndrome	0.0206832
Cluster17	primary neural tube formation	0.00983725		Cluster25	Malignant neoplasm of brain	0.0212425
Cluster17	regulation of protein metabolic process	0.00983725		Cluster25	Chromosome Aberrations	0.0214471
Cluster17	forebrain development	0.0100112		Cluster25	Human T-cell lymphotropic virus 1 infection	0.0214471
Cluster17	negative regulation of intracellular transport	0.0105191		Cluster25	Anemia	0.0218906
Cluster17	regulation of response to stimulus	0.0107575		Cluster25	Bronchiectasis	0.0222293
Cluster17	regulation of cell morphogenesis	0.0108727		Cluster25	Blood Coagulation Disorders	0.0222293
Cluster17	cell communication	0.0109325		Cluster25	Adenocarcinoma of pancreas	0.0227654
Cluster17	axis specification	0.0109325		Cluster25	Aortic Valve Insufficiency	0.022965
Cluster17	negative regulation of transport	0.0109417		Cluster25	Agenesis of corpus callosum	0.0234118
Cluster17	tube development	0.0109417		Cluster25	Nephroblastoma	0.0234187
Cluster17	negative regulation of response to stimulus	0.0109417		Cluster25	Intrahepatic Cholangiocarcinoma	0.0239024
Cluster17	tube morphogenesis	0.0109417		Cluster25	Sarcoma	0.0251333
Cluster17	cerebral cortex development	0.0111804		Cluster25	Malignant mesothelioma	0.0253518
Cluster17	cell morphogenesis	0.0114097		Cluster25	Cystic Fibrosis	0.0253518
Cluster17	negative regulation of canonical Wnt receptor signaling pathway	0.0114097		Cluster25	Tuberculosis	0.0253518
Cluster17	pancreas development	0.0117053		Cluster25	Degenerative polyarthritis	0.0254392
Cluster17	cell surface receptor signaling pathway	0.0117053		Cluster25	Central Serous Chorioretinopathy	0.025466
Cluster17	cellular response to stimulus	0.0117053		Cluster25	Rectal Carcinoma	0.025466
Cluster17	canonical Wnt receptor signaling pathway	0.0117053		Cluster25	Cardiomyopathy, Familial Idiopathic	0.0263395
Cluster17	regulation of cell size	0.0117053		Cluster25	Coronary Artery Disease	0.0270288
Cluster17	cell projection organization	0.0119495		Cluster25	Hormone refractory prostate cancer	0.0273141
Cluster17	regulation of intracellular protein kinase cascade	0.0121254		Cluster25	Squamous cell carcinoma of esophagus	0.0274786
Cluster17	negative regulation of signal transduction	0.0122796		Cluster25	Hypertrophic Cardiomyopathy	0.0283895
Cluster17	regulation of molecular function	0.0122997		Cluster25	hearing impairment	0.0283895
Cluster17	regulation of Wnt receptor signaling pathway	0.0127022		Cluster25	Pituitary Diseases	0.0305851
Cluster17	enzyme linked receptor protein signaling pathway	0.0127022		Cluster25	Adenocarcinoma of colon	0.0305935
Cluster17	cell projection morphogenesis	0.0127022		Cluster25	Prostatic Intraepithelial Neoplasias	0.0307597
Cluster17	regulation of cellular localization	0.0127022		Cluster25	Congestive heart failure	0.0308474
Cluster17	cell morphogenesis involved in differentiation	0.0127022		Cluster25	Huntington Disease	0.0308656
Cluster17	negative regulation of transferase activity	0.0127022		Cluster25	Luminal A Breast Carcinoma	0.0310285
Cluster17	embryo development	0.0127022		Cluster25	Autoimmune Diseases	0.0313666
Cluster17	cellular component morphogenesis	0.0127022		Cluster25	IGA Glomerulonephritis	0.0325163
Cluster17	regulation of microtubule cytoskeleton organization	0.0127022		Cluster25	Impaired cognition	0.0325163
Cluster17	regulation of phosphate metabolic process	0.0127022		Cluster25	Cardiomyopathy, Dilated	0.0330543
Cluster17	regulation of phosphorus metabolic process	0.0127022		Cluster25	Multiple malignancy	0.0333027
Cluster17	negative regulation of biological process	0.0127022		Cluster25	Mesothelioma (malignant, clinical disorder) (disorder)	0.0335203
Cluster17	morphogenesis of an epithelium	0.0127022		Cluster25	Adenocarcinoma Of Esophagus	0.0340762
Cluster17	regulation of GTPase activity	0.0129858		Cluster25	Osteosarcoma of bone	0.0345966
Cluster17	cell part morphogenesis	0.0129858		Cluster25	Malignant neoplasm of kidney	0.0347751
Cluster17	regulation of GTP catabolic process	0.0133604		Cluster25	Congenital Epicanthus	0.0353563
Cluster17	regulation of neuron projection development	0.0133604		Cluster25	Hypoplastic mandible condyle	0.0356904
Cluster17	regulation of catalytic activity	0.0134542		Cluster25	Neutropenia	0.0360257
Cluster17	positive regulation of apoptotic process	0.0135521		Cluster25	Virus Diseases	0.0362877
Cluster17	negative regulation of cellular component organization	0.0136712		Cluster25	Mandibular hypoplasia	0.0366736
Cluster17	regulation of protein complex assembly	0.0137		Cluster25	Micrognathism	0.0366736
Cluster17	positive regulation of programmed cell death	0.0137		Cluster25	Myelodysplasia	0.0367498
Cluster17	regulation of cell development	0.0137		Cluster25	Eosinophilia	0.0372942
Cluster17	mesenchymal cell development	0.0137961		Cluster25	Diarrhea	0.0377579
Cluster17	positive regulation of cell death	0.0137961		Cluster25	Eczema	0.0383667
Cluster17	positive regulation of cell differentiation	0.0137961		Cluster25	Muscle hypotonia	0.0385874
Cluster17	regulation of axonogenesis	0.0137961		Cluster25	Hairy Cell Leukemia	0.0385874
Cluster17	regulation of osteoblast differentiation	0.0137961		Cluster25	Merkel cell carcinoma	0.0385874
Cluster17	anatomical structure morphogenesis	0.0137961		Cluster25	Respiratory function loss	0.0385874
Cluster17	regulation of protein kinase activity	0.0137961		Cluster25	Short stature	0.0394266
Cluster17	chordate embryonic development	0.0137961		Cluster25	Synovitis	0.0396526
Cluster17	negative regulation of protein serine/threonine kinase activity	0.0137961		Cluster25	Respiratory Syncytial Virus Infections	0.0404938
Cluster17	biological adhesion	0.0137961		Cluster25	Biliary Atresia	0.0405914
Cluster17	cell adhesion	0.0137961		Cluster25	Pruritus	0.0405914
Cluster17	regulation of transmission of nerve impulse	0.0137961		Cluster25	Hypoglycemia	0.0405914
Cluster17	positive regulation of developmental process	0.0137961		Cluster25	Herpes Simplex Infections	0.0409205
Cluster17	generation of neurons	0.0137961		Cluster25	Melanocytic nevus	0.0412088
Cluster17	maintenance of protein location in cell	0.0137961		Cluster25	Skin endocrine disorder	0.0412088
Cluster17	response to estradiol stimulus	0.0137961		Cluster25	Pituitary Adenoma	0.0412583
Cluster17	negative regulation of protein metabolic process	0.0137961		Cluster25	Leukemia, B-Cell	0.0413471
Cluster17	regulation of multicellular organismal process	0.0138423		Cluster25	Adenomatous Polyposis Coli	0.0420948
Cluster17	pallium development	0.0146129		Cluster25	Invasive carcinoma of breast	0.0420948
Cluster17	regulation of protein localization	0.0152976		Cluster25	Pancreatic Ductal Adenocarcinoma	0.0421564
Cluster17	regulation of kinase activity	0.0152976		Cluster25	Aortic Valve Stenosis	0.0435373
Cluster17	regulation of nucleotide catabolic process	0.0152976		Cluster25	Epithelial ovarian cancer	0.0436821
Cluster17	regulation of purine nucleotide catabolic process	0.0152976		Cluster25	Infantile onset	0.0441008
Cluster17	regulation of protein phosphorylation	0.0155927		Cluster25	Dementia	0.0453058
Cluster17	negative regulation of protein phosphorylation	0.0157329		Cluster25	Gastric Adenocarcinoma	0.04537
Cluster17	negative regulation of protein modification process	0.0157329		Cluster25	Immunologic Deficiency Syndromes	0.04537
Cluster17	regulation of developmental growth	0.0157329		Cluster25	Abnormality of metabolism/homeostasis	0.04537
Cluster17	regulation of apoptotic process	0.0157329		Cluster25	High forehead	0.04537
Cluster17	regulation of MAPK cascade	0.0157358		Cluster25	Tall forehead	0.04537
Cluster17	maintenance of location in cell	0.0160039		Cluster25	Kidney Neoplasm	0.0457466
Cluster17	regulation of programmed cell death	0.0160984		Cluster25	Peripheral T-Cell Lymphoma	0.0478331
Cluster17	response to inorganic substance	0.0161415		Cluster25	Invasive Ductal Breast Carcinoma	0.0478331
Cluster17	maintenance of protein location	0.0161862		Cluster25	Neoplasm, Residual	0.0478331
Cluster17	neurogenesis	0.0166064		Cluster25	Lymphopenia	0.0486706
Cluster17	cell morphogenesis involved in neuron differentiation	0.0166513		Cluster25	Malignant neoplasm of larynx	0.0486706
Cluster17	regulation of protein modification process	0.0166861		Cluster25	Respiratory Insufficiency	0.0486706
Cluster17	mesenchymal cell differentiation	0.0166861		Cluster25	Acute Coronary Syndrome	0.0495049
Cluster17	negative regulation of cell development	0.0166861		Cluster25	Carcinoma, Endometrioid	0.0495049
Cluster17	regulation of neurogenesis	0.0171208		Cluster25	Carcinoma, Small Cell	0.0495049
Cluster17	regulation of cell death	0.0173918		Cluster25	Hyperthyroidism	0.0495049
Cluster17	neuron projection morphogenesis	0.0178502		Cluster25	Pancreatic intraepithelial neoplasia	0.0495049
Cluster17	negative regulation of phosphorylation	0.0179088		Cluster26	Autosomal dominant retinitis pigmentosa	9.51528e-05
Cluster17	regulation of anatomical structure morphogenesis	0.0188087		Cluster26	Conductive hearing loss	0.00129947
Cluster17	regulation of Ras GTPase activity	0.0188087		Cluster26	Static Tremor	0.00665395
Cluster17	regulation of phosphorylation	0.0188087		Cluster26	Night blindness, progressive	0.00665395
Cluster17	regulation of canonical Wnt receptor signaling pathway	0.0191482		Cluster26	Mixed Connective Tissue Disease	0.00665395
Cluster17	negative regulation of cell proliferation	0.0195805		Cluster26	Congenital anomaly of testis	0.00665395
Cluster17	negative regulation of cell differentiation	0.0198114		Cluster26	Abnormal upper motor neuron morphology	0.00705049
Cluster17	regulation of cell differentiation	0.0198114		Cluster26	Abnormality of the retinal vasculature	0.00798456
Cluster17	negative regulation of intracellular protein kinase cascade	0.0198114		Cluster26	Frontotemporal dementia	0.00843993
Cluster17	regionalization	0.020166		Cluster26	Atypical scarring of skin	0.0136878
Cluster17	regulation of protein serine/threonine kinase activity	0.020526		Cluster26	Ophthalmoplegia	0.0136878
Cluster17	microtubule cytoskeleton organization	0.0210908		Cluster26	de novo myelodysplastic syndromes	0.0312222
Cluster17	mesenchyme development	0.0211019		Cluster26	Maturation defect	0.0323142
Cluster17	nerve growth factor receptor signaling pathway	0.0212123		Cluster26	Absent auditory canals	0.0323142
Cluster17	regulation of cellular catabolic process	0.0214816		Cluster26	Absent external auditory canals	0.0323142
Cluster17	negative regulation of cellular process	0.0218748		Cluster26	Atresia of the external auditory canal	0.0323142
Cluster17	maintenance of location	0.0221492		Cluster26	Atretic auditory canal	0.0323142
Cluster17	regulation of endocytosis	0.0221492		Cluster26	Terminal tremor	0.0323142
Cluster17	regulation of nervous system development	0.0221492		Cluster26	Spinal Muscular Atrophy	0.0394779
Cluster17	tissue morphogenesis	0.0223184		Cluster26	Degenerative disorder	0.0409348
Cluster17	tissue development	0.0226193		Cluster26	Electroretinogram abnormal	0.0421015
Cluster17	embryonic morphogenesis	0.0236205		Cluster26	Congenital small ears	0.0493399
Cluster17	neuron projection development	0.0239271		Cluster26	Missing more than six teeth	0.0493399
Cluster17	negative regulation of cell cycle	0.0239415		Cluster26	Spastic syndrome	0.0493399
Cluster17	positive regulation of GTPase activity	0.0244761		Cluster27	Spastic paraplegia 10, autosomal dominant	5.04691e-06
Cluster17	cellular response to growth factor stimulus	0.0248323		Cluster27	Spastic Paraplegia	0.000160905
Cluster17	positive regulation of catabolic process	0.0248323		Cluster27	Microcephaly	0.000263175
Cluster17	intracellular protein kinase cascade	0.0256925		Cluster27	Congenital long QT syndrome	0.000375732
Cluster17	regulation of cell cycle	0.0270568		Cluster27	congenital cerebellar ataxia	0.00146591
Cluster17	negative regulation of cellular protein metabolic process	0.0273135		Cluster27	African Trypanosomiasis	0.00146591
Cluster17	regulation of transmembrane transport	0.0273135		Cluster27	Adult onset autosomal dominant leukodystrophy	0.00166396
Cluster17	response to stimulus	0.0296897		Cluster27	Pertussis	0.00166396
Cluster17	response to growth factor stimulus	0.030815		Cluster27	Spastic Paraplegia, Hereditary	0.00166396
Cluster17	telencephalon development	0.0319035		Cluster27	Glycogen Storage Disease Type VII	0.00166396
Cluster17	cellular protein localization	0.0319035		Cluster27	Idiopathic scoliosis	0.00166396
Cluster17	regulation of multicellular organismal development	0.0319035		Cluster27	MASA SYNDROME (disorder)	0.00166396
Cluster17	system development	0.0319035		Cluster27	Quebec platelet disorder	0.00166396
Cluster17	regulation of small GTPase mediated signal transduction	0.0319035		Cluster27	Multiple Epiphyseal Dysplasia	0.00444882
Cluster17	regulation of ossification	0.03193		Cluster27	Paroxysmal familial ventricular fibrillation	0.00515061
Cluster17	cellular macromolecule localization	0.03193		Cluster27	Specific language impairment	0.00515061
Cluster17	positive regulation of transport	0.0322351		Cluster27	Pseudoachondroplasia	0.00559547
Cluster17	cell death	0.0322801		Cluster27	Timothy syndrome	0.00559547
Cluster17	death	0.0325877		Cluster27	X-linked hydrocephalus syndrome	0.00559547
Cluster17	regulation of cellular component size	0.0331448		Cluster27	Aneuploidy	0.00610341
Cluster17	anatomical structure formation involved in morphogenesis	0.0331448		Cluster27	Prolonged QT interval	0.00610341
Cluster17	regulation of system process	0.0331448		Cluster27	Residual Cancer	0.00610341
Cluster17	epithelium development	0.0331448		Cluster27	Renal dysplasia and retinal aplasia (disorder)	0.00724183
Cluster17	negative regulation of protein kinase activity	0.0331448		Cluster27	CATARACT, MARNER TYPE	0.00813739
Cluster17	response to estrogen stimulus	0.0331448		Cluster27	Severe depression	0.00813739
Cluster17	regulation of neuron differentiation	0.0332588		Cluster27	Chromosomal Instability	0.00875512
Cluster17	cellular component organization	0.0363917		Cluster27	Chronic atrial fibrillation	0.00875512
Cluster17	negative regulation of kinase activity	0.0363917		Cluster27	Reticuloendotheliosis, X-linked	0.00875512
Cluster17	regulation of cellular protein metabolic process	0.0370435		Cluster27	VENTRICULAR TACHYCARDIA, CATECHOLAMINERGIC POLYMORPHIC, 1 (disorder)	0.0100665
Cluster17	positive regulation of biological process	0.0370435		Cluster27	Romano-Ward Syndrome	0.0133883
Cluster17	regulation of developmental process	0.0370435		Cluster27	Stress, Psychological	0.0141768
Cluster17	cardiovascular system development	0.0370435		Cluster27	Weakness of lower limb	0.0190569
Cluster17	circulatory system development	0.0370435		Cluster27	Henoch-Schoenlein Purpura	0.0201408
Cluster17	axonogenesis	0.0378527		Cluster27	Congenital cataract	0.0222047
Cluster17	regulation of purine nucleotide metabolic process	0.0378527		Cluster27	Acute Megakaryocytic Leukemias	0.0356227
Cluster17	negative regulation of catalytic activity	0.0379553		Cluster27	Sloping forehead	0.0368148
Cluster17	negative regulation of macromolecule metabolic process	0.0381811		Cluster27	Pachygyria	0.043099
Cluster17	regulation of nucleotide metabolic process	0.0382143		Cluster27	Long QT Syndrome	0.0472899
Cluster17	negative regulation of developmental process	0.0382143		Cluster27	Angelman Syndrome	0.0489714
Cluster17	heart morphogenesis	0.0385588		Cluster27	Delirium	0.0489714
Cluster17	kidney development	0.0385588		Cluster27	Distal sensory impairment	0.0489714
Cluster17	neuron development	0.0394958		Cluster27	Vertigo	0.0489714
Cluster17	regulation of growth	0.0403874		Cluster29	Pheochromocytoma	0.0120325
Cluster17	apoptotic process	0.0403874		Cluster29	Carcinomatosis of peritoneal cavity	0.0120325
Cluster17	renal system development	0.0409401		Cluster29	Hamartoma	0.0120325
Cluster17	programmed cell death	0.0419446		Cluster29	Dyskinetic syndrome	0.0120325
Cluster17	pattern specification process	0.0419446		Cluster29	Dementia, Vascular	0.0139477
Cluster17	epidermis development	0.0419446		Cluster29	Atrophic	0.0139477
Cluster17	regulation of cellular component biogenesis	0.0422438		Cluster29	Skin Neoplasms	0.0139477
Cluster17	regulation of cellular process	0.0437719		Cluster29	Tuberous Sclerosis	0.0141111
Cluster17	regulation of synaptic transmission	0.0437719		Cluster29	Rectal Neoplasms	0.017659
Cluster17	microtubule-based process	0.0439037		Cluster29	Paroxysmal kinesigenic choreoathetosis	0.0248141
Cluster17	cellular component organization or biogenesis	0.0441159		Cluster29	Adenocarcinoma, Clear Cell	0.0248141
Cluster17	positive regulation of MAPK cascade	0.0456236		Cluster29	Familial multiple trichoepitheliomata	0.0366305
Cluster17	positive regulation of catalytic activity	0.0490108		Cluster29	Hamartoma Syndrome, Multiple	0.0402347
Cluster18	mitotic prometaphase	1.36328e-46		Cluster29	Head and Neck Neoplasms	0.0418438
Cluster18	glucose transport	5.20589e-36		Cluster29	Aplasia Cutis Congenita	0.0478617
Cluster18	hexose transport	5.20589e-36		Cluster3	Early-Onset Glaucoma	2.02613e-05
Cluster18	monosaccharide transport	7.46151e-36		Cluster3	Congenital Structural Myopathy	2.02613e-05
Cluster18	carbohydrate transport	6.81108e-33		Cluster3	X-linked centronuclear myopathy	3.23283e-05
Cluster18	regulation of glucose transport	8.98107e-33		Cluster3	Centronuclear myopathy	0.000130246
Cluster18	mitosis	8.00657e-30		Cluster3	Inherited neuropathies	0.000899547
Cluster18	nuclear division	8.00657e-30		Cluster3	Gait abnormality	0.000899547
Cluster18	M phase of mitotic cell cycle	1.21173e-29		Cluster3	Charcot-Marie-Tooth Disease	0.000899547
Cluster18	organelle fission	2.38023e-29		Cluster3	Peripheral Neuropathy	0.00101177
Cluster18	mRNA transport	1.51074e-28		Cluster3	Facial muscle weakness of muscles innervated by CN VII	0.00132427
Cluster18	RNA transport	4.63751e-27		Cluster3	Bell Palsy	0.00132427
Cluster18	establishment of RNA localization	4.63751e-27		Cluster3	Facial Paresis	0.00132427
Cluster18	nucleic acid transport	4.63751e-27		Cluster3	Absent reflex	0.0031837
Cluster18	M phase	6.21241e-27		Cluster3	Absent tendon reflex	0.0031837
Cluster18	RNA localization	1.64814e-26		Cluster3	Reflex, Deep Tendon, Absent	0.0031837
Cluster18	nucleobase-containing compound transport	1.94288e-26		Cluster3	Bilateral fifth finger clinodactyly	0.00577522
Cluster18	carbohydrate metabolic process	2.48742e-23		Cluster3	Curvature of little finger	0.00577522
Cluster18	organic substance transport	1.91732e-20		Cluster3	Neuropathy	0.00590547
Cluster18	mitotic cell cycle	3.58179e-20		Cluster3	Glaucoma	0.00734278
Cluster18	cell cycle phase	4.98179e-20		Cluster3	Visual Impairment	0.0149811
Cluster18	cytokine-mediated signaling pathway	6.40115e-20		Cluster3	Small head	0.0179563
Cluster18	viral reproduction	7.80647e-20		Cluster3	Low Vision	0.0205175
Cluster18	cellular response to cytokine stimulus	7.29187e-18		Cluster3	Myopia	0.0229089
Cluster18	cell cycle process	1.04145e-17		Cluster3	Lens Opacities	0.0236192
Cluster18	transmembrane transport	2.48666e-16		Cluster3	Lymphoproliferative Disorders	0.0339946
Cluster18	chromosome segregation	2.54585e-16		Cluster3	Muscle Weakness	0.0339946
Cluster18	response to cytokine stimulus	8.43665e-16		Cluster3	Orbital separation excessive	0.0339946
Cluster18	cell cycle	8.86544e-15		Cluster3	Schizophrenia	0.0432697
Cluster18	protein localization	1.56759e-13		Cluster3	Curvature of spine	0.0432697
Cluster18	macromolecule localization	1.19176e-12		Cluster3	Acquired scoliosis	0.0490332
Cluster18	CenH3-containing nucleosome assembly at centromere	9.5643e-12		Cluster3	Gastrointestinal Stromal Tumors	0.0490332
Cluster18	DNA replication-independent nucleosome assembly	9.5643e-12		Cluster31	Uterine Fibroids	1.15092e-05
Cluster18	DNA replication-independent nucleosome organization	9.5643e-12		Cluster31	Coronary Restenosis	0.000231962
Cluster18	nucleocytoplasmic transport	1.32529e-11		Cluster31	Bone necrosis	0.000231962
Cluster18	chromatin remodeling at centromere	1.45019e-11		Cluster31	Fibroid Tumor	0.000267397
Cluster18	nuclear transport	1.63162e-11		Cluster31	Endometriosis	0.000350357
Cluster18	histone exchange	2.14565e-11		Cluster31	Thyroid Hormone Resistance Syndrome	0.000446826
Cluster18	organelle organization	2.42955e-11		Cluster31	Prostatic Neoplasms	0.000459556
Cluster18	regulation of transport	2.54038e-11		Cluster31	Endometrial Hyperplasia	0.000505293
Cluster18	protein transport	2.82412e-11		Cluster31	ATRICHIA WITH PAPULAR LESIONS	0.000899167
Cluster18	establishment of protein localization	4.46449e-11		Cluster31	Endometrial Carcinoma	0.00158405
Cluster18	ATP-dependent chromatin remodeling	6.29577e-11		Cluster31	Hepatopulmonary Syndrome	0.00166261
Cluster18	cell division	1.95915e-10		Cluster31	Mammary Neoplasms	0.00176104
Cluster18	protein-DNA complex assembly	1.4116e-09		Cluster31	Narrowing	0.00176104
Cluster18	regulation of localization	2.85752e-09		Cluster31	Mammary Tumorigenesis	0.00188999
Cluster18	protein-DNA complex subunit organization	6.95368e-09		Cluster31	Noninfiltrating Intraductal Carcinoma	0.00257186
Cluster18	cellular response to organic substance	2.11474e-08		Cluster31	Non-infiltrating lobular carcinoma	0.00257186
Cluster18	small molecule metabolic process	2.98482e-08		Cluster31	Microsatellite Instability	0.00257186
Cluster18	cellular localization	4.29142e-08		Cluster31	Cognitive changes	0.00257186
Cluster18	nucleosome assembly	7.67229e-08		Cluster31	Fatty Liver, Alcoholic	0.00257186
Cluster18	cellular component organization at cellular level	8.44918e-08		Cluster31	Lobular carcinoma in situ of breast	0.00257186
Cluster18	localization	8.44918e-08		Cluster31	Fibroadenoma	0.00257186
Cluster18	establishment of localization in cell	1.53864e-07		Cluster31	Malignant neoplasm of breast	0.00257186
Cluster18	chromatin assembly	1.79401e-07		Cluster31	Steatohepatitis	0.00257186
Cluster18	establishment of localization	2.16108e-07		Cluster31	Insulin Resistance	0.00299002
Cluster18	cellular component organization or biogenesis at cellular level	2.21818e-07		Cluster31	Promyelocytic leukemia	0.00305367
Cluster18	kinetochore organization	2.55665e-07		Cluster31	Metabolic Diseases	0.00323474
Cluster18	intracellular transport	4.19542e-07		Cluster31	Cutaneous Melanoma	0.00375864
Cluster18	nucleosome organization	4.64461e-07		Cluster31	Coronary Stenosis	0.00375864
Cluster18	chromatin assembly or disassembly	8.32994e-07		Cluster31	Prostate carcinoma	0.00375864
Cluster18	chromatin remodeling	8.32994e-07		Cluster31	Osteoporosis, Postmenopausal	0.00375864
Cluster18	attachment of spindle microtubules to kinetochore	1.08533e-06		Cluster31	Obsessive compulsive behavior	0.00382658
Cluster18	cellular response to chemical stimulus	1.18656e-06		Cluster31	Tumor Progression	0.00393656
Cluster18	DNA packaging	1.53376e-06		Cluster31	Lipoatrophy	0.00435166
Cluster18	attachment of spindle microtubules to chromosome	3.07099e-06		Cluster31	Cholestasis	0.00435166
Cluster18	protein import into nucleus	4.77062e-06		Cluster31	Pre-renal acute kidney injury	0.00465807
Cluster18	nuclear import	6.27102e-06		Cluster31	Endometrial Neoplasms	0.00492948
Cluster18	cellular macromolecular complex assembly	7.87582e-06		Cluster31	Osteoarthritis, Knee	0.00498198
Cluster18	cellular component organization	7.9887e-06		Cluster31	Liver and Intrahepatic Biliary Tract Carcinoma	0.00498198
Cluster18	spindle assembly checkpoint	1.07889e-05		Cluster31	Malignant neoplasm of endometrium	0.00498198
Cluster18	DNA conformation change	1.10329e-05		Cluster31	Uterine Corpus Cancer	0.00498198
Cluster18	kinetochore assembly	1.75866e-05		Cluster31	Retinoblastoma	0.00498198
Cluster18	cellular component organization or biogenesis	1.75866e-05		Cluster31	Malignant neoplasm of prostate	0.00498198
Cluster18	transport	2.19564e-05		Cluster31	M5b Acute differentiated monocytic leukemia	0.00498198
Cluster18	spindle checkpoint	2.2905e-05		Cluster31	Adenocarcinoma of prostate	0.00506752
Cluster18	cellular macromolecular complex subunit organization	3.55515e-05		Cluster31	Skin endocrine disorder	0.00599553
Cluster18	microtubule cytoskeleton organization	3.84097e-05		Cluster31	Weight decreased	0.00627288
Cluster18	response to organic substance	3.87585e-05		Cluster31	Non-Small Cell Lung Carcinoma	0.00627288
Cluster18	protein localization to nucleus	3.87585e-05		Cluster31	Aortic Valve Stenosis	0.00627288
Cluster18	chromosome organization	4.23413e-05		Cluster31	Lipodystrophy	0.00627288
Cluster18	centromere complex assembly	5.48819e-05		Cluster31	Bladder Neoplasm	0.00627288
Cluster18	microtubule-based process	7.6698e-05		Cluster31	Barrett Esophagus	0.00664915
Cluster18	nuclear export	0.000107312		Cluster31	early pregnancy	0.00708412
Cluster18	microtubule anchoring	0.000110964		Cluster31	Obesity	0.00713468
Cluster18	cellular protein localization	0.000150578		Cluster31	Dyslipidemias	0.00733912
Cluster18	cellular macromolecule localization	0.000157792		Cluster31	Breast Carcinoma	0.00760857
Cluster18	mRNA export from nucleus	0.000165511		Cluster31	Non-alcoholic Fatty Liver Disease	0.00760857
Cluster18	protein import	0.00016984		Cluster31	Systemic arterial pressure	0.00760857
Cluster18	mitotic cell cycle spindle assembly checkpoint	0.000197168		Cluster31	Sentinel node (disorder)	0.00763985
Cluster18	negative regulation of mitotic metaphase/anaphase transition	0.000224855		Cluster31	Obesity, Morbid	0.00826691
Cluster18	nucleus organization	0.0002551		Cluster31	Pituitary Diseases	0.00856383
Cluster18	mitotic cell cycle spindle checkpoint	0.000285983		Cluster31	Malignant neoplasm of liver	0.009238
Cluster18	RNA export from nucleus	0.000285983		Cluster31	Acute Erythroblastic Leukemia	0.00969963
Cluster18	negative regulation of mitosis	0.000316979		Cluster31	Carcinogenesis	0.00969963
Cluster18	negative regulation of nuclear division	0.000316979		Cluster31	Malignant tumor of colon	0.00976928
Cluster18	mitotic sister chromatid segregation	0.000354858		Cluster31	Liver carcinoma	0.00976928
Cluster18	cell surface receptor signaling pathway	0.000409481		Cluster31	Brain Ischemia	0.00976928
Cluster18	sister chromatid segregation	0.000491625		Cluster31	Monocytic leukemia	0.00976928
Cluster18	regulation of mitotic metaphase/anaphase transition	0.000542458		Cluster31	Aortic Valve Insufficiency	0.0103677
Cluster18	regulation of mitosis	0.00068038		Cluster31	Adenomatous polyp of colon	0.0105267
Cluster18	regulation of nuclear division	0.00068038		Cluster31	Osteoarthritis of hip	0.0105267
Cluster18	protein targeting	0.000922306		Cluster31	Fatty Liver	0.0107834
Cluster18	organelle localization	0.00108613		Cluster31	Carcinoma of bladder	0.0108862
Cluster18	establishment of organelle localization	0.00114569		Cluster31	Rectal Carcinoma	0.0110637
Cluster18	cellular component assembly at cellular level	0.00181912		Cluster31	Biliary Tract Neoplasm	0.0110637
Cluster18	DNA metabolic process	0.00227715		Cluster31	Congenital Heart Defects	0.0110637
Cluster18	macromolecular complex assembly	0.00341644		Cluster31	Leukemia, Myelocytic, Acute	0.0110637
Cluster18	intracellular protein transport	0.00393034		Cluster31	Schizophrenia	0.0113658
Cluster18	spindle organization	0.00427935		Cluster31	Cholecystolithiasis	0.0116496
Cluster18	macromolecular complex subunit organization	0.00537916		Cluster31	Phyllodes Tumor	0.0116496
Cluster18	protein localization to organelle	0.00576575		Cluster31	Sarcoma	0.0116661
Cluster18	maintenance of protein location in cell	0.00607243		Cluster31	Trichohepatoenteric Syndrome	0.0117175
Cluster18	mitotic cell cycle checkpoint	0.00619082		Cluster31	Benign Prostatic Hyperplasia	0.0117175
Cluster18	primary metabolic process	0.00690242		Cluster31	Osteosarcoma of bone	0.0117175
Cluster18	chromatin modification	0.00697114		Cluster31	Idiopathic pulmonary arterial hypertension	0.0118925
Cluster18	negative regulation of cell cycle process	0.00714244		Cluster31	FRIEDREICH ATAXIA 1	0.0125
Cluster18	response to chemical stimulus	0.00748674		Cluster31	Sciatic Neuropathy	0.0125
Cluster18	maintenance of location in cell	0.00807908		Cluster31	Anaplasia	0.0133702
Cluster18	maintenance of protein location	0.00838362		Cluster31	Follicular thyroid carcinoma	0.0140939
Cluster18	central nervous system neuron development	0.00870216		Cluster31	Metabolic Syndrome X	0.0141024
Cluster18	cellular protein complex assembly	0.00960794		Cluster31	Adrenocortical carcinoma	0.0145957
Cluster18	cell cycle checkpoint	0.0127831		Cluster31	Rhabdomyosarcoma	0.0153918
Cluster18	chromatin organization	0.0140732		Cluster31	Lymphoma, Non-Hodgkin	0.0154856
Cluster18	maintenance of location	0.0153782		Cluster31	Liver Cirrhosis	0.0156777
Cluster18	signal transduction	0.0164006		Cluster31	Malignant neoplasm of urinary bladder	0.0156777
Cluster18	cellular process	0.017338		Cluster31	polyps	0.0156777
Cluster18	regulation of cell cycle arrest	0.0190664		Cluster31	B-Cell Lymphomas	0.0161322
Cluster18	cytoskeleton organization	0.0203218		Cluster31	Osteoporosis	0.0161322
Cluster18	regulation of mitotic cell cycle	0.0248058		Cluster31	invasive cancer	0.0167027
Cluster18	metabolic process	0.027451		Cluster31	Hashimoto Disease	0.0169772
Cluster18	cellular component assembly	0.0304052		Cluster31	Presenile dementia	0.0170772
Cluster18	negative regulation of organelle organization	0.0325424		Cluster31	Refractory anemias	0.0181425
Cluster18	regulation of nucleocytoplasmic transport	0.0325424		Cluster31	Osteosarcoma	0.0181425
Cluster18	organelle assembly	0.0337877		Cluster31	body mass	0.0192708
Cluster18	regulation of cell cycle process	0.0365291		Cluster31	Nonorganic psychosis	0.0192708
Cluster19	vesicle coating	1.6135e-26		Cluster31	Renal carcinoma	0.0192708
Cluster19	membrane budding	7.05631e-26		Cluster31	Hypothyroidism	0.019443
Cluster19	Golgi vesicle transport	9.61497e-25		Cluster31	Inflammatory Breast Carcinoma	0.0194935
Cluster19	vesicle-mediated transport	5.2646e-22		Cluster31	Lymphatic Metastasis	0.0195322
Cluster19	vesicle targeting, to, from or within Golgi	5.2646e-22		Cluster31	Albuminuria	0.0195322
Cluster19	vesicle organization	6.1886e-20		Cluster31	Luminal A Breast Carcinoma	0.0195322
Cluster19	protein transport	6.1886e-20		Cluster31	Premature aging syndrome	0.0195322
Cluster19	vesicle targeting	9.19577e-20		Cluster31	Alzheimer Disease, Late Onset	0.0197979
Cluster19	establishment of protein localization	9.19577e-20		Cluster31	Obsessive-Compulsive Disorder	0.0211874
Cluster19	cellular membrane organization	1.20766e-19		Cluster31	Thyroid Gland Follicular Adenoma	0.0211874
Cluster19	membrane organization	1.20766e-19		Cluster31	Acute Promyelocytic Leukemia	0.0211874
Cluster19	intracellular protein transport	6.22222e-19		Cluster31	Bloom Syndrome	0.02151
Cluster19	intracellular transport	1.62505e-18		Cluster31	Rhabdomyosarcoma, Embryonal	0.02151
Cluster19	establishment of vesicle localization	1.83137e-18		Cluster31	Rectal Neoplasms	0.0221082
Cluster19	protein localization	1.27915e-16		Cluster31	Subarachnoid Hemorrhage	0.0224633
Cluster19	vesicle localization	1.80566e-16		Cluster31	Coronary Artery Disease	0.0231208
Cluster19	cellular protein localization	3.23869e-15		Cluster31	Neoplasms, Second Primary	0.0236285
Cluster19	cellular macromolecule localization	3.46195e-15		Cluster31	Cholelithiasis	0.0237469
Cluster19	establishment of localization in cell	5.51803e-15		Cluster31	Thyroid Neoplasm	0.0242864
Cluster19	regulation of defense response to virus by virus	6.73081e-15		Cluster31	Hyperglycemia	0.0244107
Cluster19	macromolecule localization	6.73081e-15		Cluster31	Liver neoplasms	0.0256664
Cluster19	transport	2.35795e-14		Cluster31	Colorectal Carcinoma	0.0256664
Cluster19	establishment of organelle localization	2.88773e-14		Cluster31	Encephalomyelitis	0.0260774
Cluster19	establishment of localization	4.57904e-14		Cluster31	Bipolar Disorder	0.0262968
Cluster19	cellular localization	4.35871e-13		Cluster31	Motor delay	0.0262968
Cluster19	COPI coating of Golgi vesicle	1.18022e-12		Cluster31	No development of motor milestones	0.0262968
Cluster19	COPI-coated vesicle budding	1.18022e-12		Cluster31	Left Ventricular Hypertrophy	0.0264621
Cluster19	Golgi transport vesicle coating	1.18022e-12		Cluster31	Colon Carcinoma	0.0264621
Cluster19	Golgi vesicle budding	1.18022e-12		Cluster31	liposarcoma	0.0265346
Cluster19	antigen processing and presentation	2.46845e-12		Cluster31	Amyloidosis	0.0265461
Cluster19	retrograde vesicle-mediated transport, Golgi to ER	5.60869e-12		Cluster31	Renal Cell Carcinoma	0.0265461
Cluster19	organelle localization	5.60869e-12		Cluster31	Familial Alzheimer Disease (FAD)	0.0284798
Cluster19	regulation of defense response to virus	8.61708e-12		Cluster31	leiomyosarcoma	0.0289644
Cluster19	antigen processing and presentation of peptide antigen	5.42441e-11		Cluster31	Fetal Membranes, Premature Rupture	0.0289644
Cluster19	localization	7.80774e-11		Cluster31	Carcinoma, Endometrioid	0.0293806
Cluster19	regulation of response to biotic stimulus	1.09578e-10		Cluster31	Hyperthyroidism	0.0293806
Cluster19	antigen processing and presentation of peptide antigen via MHC class I	7.33272e-10		Cluster31	Colorectal Cancer	0.0294143
Cluster19	COPII vesicle coating	7.544e-10		Cluster31	Biliary cirrhosis	0.029626
Cluster19	COPII-coated vesicle budding	7.544e-10		Cluster31	Venous Thromboembolism	0.029626
Cluster19	vesicle targeting, rough ER to cis-Golgi	7.544e-10		Cluster31	Kidney Failure, Chronic	0.0298821
Cluster19	regulation of multi-organism process	1.35636e-09		Cluster31	Differentiated Thyroid Gland Carcinoma	0.0299708
Cluster19	negative regulation of ERBB signaling pathway	1.40657e-08		Cluster31	Cognition Disorders	0.0299708
Cluster19	negative regulation of epidermal growth factor receptor signaling pathway	1.40657e-08		Cluster31	Migraine Disorders	0.0299708
Cluster19	protein N-linked glycosylation via asparagine	1.40657e-08		Cluster31	Epilepsy	0.0305101
Cluster19	peptidyl-asparagine modification	1.6988e-08		Cluster31	Malignant neoplasm of kidney	0.0305101
Cluster19	protein N-linked glycosylation	2.03945e-08		Cluster31	Hyperlipidemia	0.0305101
Cluster19	regulation of immune effector process	5.47394e-08		Cluster31	Overweight	0.0308839
Cluster19	ER to Golgi vesicle-mediated transport	5.9372e-08		Cluster31	Chronic Obstructive Airway Disease	0.0308839
Cluster19	regulation of ERBB signaling pathway	1.96775e-07		Cluster31	Premature Menopause	0.0310519
Cluster19	regulation of epidermal growth factor receptor signaling pathway	1.96775e-07		Cluster31	Adenoma of large intestine	0.0314333
Cluster19	intra-Golgi vesicle-mediated transport	2.87783e-06		Cluster31	Adenocarcinoma of lung (disorder)	0.031645
Cluster19	post-translational protein modification	2.87783e-06		Cluster31	Endometrial adenocarcinoma	0.031982
Cluster19	endocytosis	3.89516e-06		Cluster31	PACHYONYCHIA CONGENITA 3	0.031982
Cluster19	macromolecule glycosylation	3.89516e-06		Cluster31	Carcinoma, Transitional Cell	0.0322454
Cluster19	protein glycosylation	3.89516e-06		Cluster31	Myeloid Leukemia	0.0341244
Cluster19	post-Golgi vesicle-mediated transport	4.09839e-06		Cluster31	Adenomatous Polyposis Coli	0.0360044
Cluster19	glycosylation	4.09839e-06		Cluster31	Tobacco Use Disorder	0.036124
Cluster19	regulation of defense response	4.10979e-06		Cluster31	Neoplastic Cell Transformation	0.0361581
Cluster19	glycoprotein biosynthetic process	5.53382e-06		Cluster31	Psychotic Disorders	0.0361581
Cluster19	clathrin coat assembly	2.65809e-05		Cluster31	Degenerative polyarthritis	0.0366859
Cluster19	glycoprotein metabolic process	3.50729e-05		Cluster31	Ataxia Telangiectasia	0.0368176
Cluster19	carbohydrate derivative biosynthetic process	3.88483e-05		Cluster31	ovarian neoplasm	0.0369013
Cluster19	ERBB signaling pathway	4.47611e-05		Cluster31	Adenocarcinoma of colon	0.0369013
Cluster19	epidermal growth factor receptor signaling pathway	4.47611e-05		Cluster31	Periodontitis	0.0369013
Cluster19	regulation of immune system process	4.98179e-05		Cluster31	Dementia	0.0369013
Cluster19	cellular carbohydrate metabolic process	5.428e-05		Cluster31	Hypercholesterolemia	0.0371121
Cluster19	antigen processing and presentation of exogenous peptide antigen via MHC class I, TAP-independent	6.60303e-05		Cluster31	Weight Gain Adverse Event	0.0371121
Cluster19	viral reproduction	0.000123288		Cluster31	Hyperplasia	0.0375983
Cluster19	cellular component organization	0.000147647		Cluster31	Penile hypospadias	0.0375983
Cluster19	regulation of endocytosis	0.000151886		Cluster31	Parkinson Disease	0.0383589
Cluster19	interferon-gamma-mediated signaling pathway	0.000151886		Cluster31	Diabetes Mellitus, Experimental	0.0383589
Cluster19	regulation of response to stress	0.000175283		Cluster31	Fibrosis, Liver	0.0383589
Cluster19	cellular component organization or biogenesis	0.000273311		Cluster31	Dyschezia	0.0383589
Cluster19	cellular response to interferon-gamma	0.000315484		Cluster31	Familial multiple trichoepitheliomata	0.0383589
Cluster19	antigen processing and presentation of exogenous peptide antigen	0.000383049		Cluster31	Mental Depression	0.0387208
Cluster19	antigen processing and presentation of exogenous antigen	0.00040421		Cluster31	Adenocarcinoma Of Esophagus	0.0387208
Cluster19	antigen processing and presentation of peptide or polysaccharide antigen via MHC class II	0.000553482		Cluster31	Huntington Disease	0.0392556
Cluster19	response to interferon-gamma	0.000576835		Cluster31	FANCONI ANEMIA, COMPLEMENTATION GROUP A (disorder)	0.0395543
Cluster19	nerve growth factor receptor signaling pathway	0.00063087		Cluster31	Monosomy	0.0398359
Cluster19	organelle organization	0.0011458		Cluster31	Turner Syndrome	0.0398359
Cluster19	regulation of vesicle-mediated transport	0.00206505		Cluster31	Osteopenia	0.0408187
Cluster19	peptidyl-amino acid modification	0.00321449		Cluster31	Coronary heart disease	0.0408255
Cluster19	ER-nucleus signaling pathway	0.00323156		Cluster31	Colitis	0.0408255
Cluster19	antigen processing and presentation of exogenous peptide antigen via MHC class I, TAP-dependent	0.0033794		Cluster31	VITILIGO-ASSOCIATED MULTIPLE AUTOIMMUNE DISEASE SUSCEPTIBILITY 1 (finding)	0.0417661
Cluster19	antigen processing and presentation of exogenous peptide antigen via MHC class I	0.00373037		Cluster31	leukemia	0.0419214
Cluster19	cellular component organization at cellular level	0.00384356		Cluster31	Measles	0.0419214
Cluster19	carbohydrate metabolic process	0.00461162		Cluster31	Neoplasm Recurrence, Local	0.0419214
Cluster19	regulation of response to stimulus	0.00500637		Cluster31	Malignant neoplasm of pancreas	0.0419214
Cluster19	negative regulation of signal transduction	0.00547247		Cluster31	Complete atrioventricular block	0.0425466
Cluster19	cellular protein complex assembly	0.00619136		Cluster31	Pain	0.0426659
Cluster19	cellular component organization or biogenesis at cellular level	0.00621587		Cluster31	Bone Diseases	0.0426659
Cluster19	negative regulation of response to stimulus	0.00621587		Cluster31	Intrahepatic Cholangiocarcinoma	0.0426659
Cluster19	axonogenesis	0.00639499		Cluster31	Precancerous Conditions	0.0426659
Cluster19	axon guidance	0.00657653		Cluster31	Chronic Periodontitis	0.0442813
Cluster19	negative regulation of signaling	0.00771907		Cluster31	Psoriasis	0.0445212
Cluster19	negative regulation of cell communication	0.00775491		Cluster31	Sporadic Breast Carcinoma	0.0447883
Cluster19	cell morphogenesis involved in neuron differentiation	0.00894753		Cluster31	Colonic Neoplasms	0.0456954
Cluster19	translation	0.00990174		Cluster31	Epithelioma	0.0462384
Cluster19	neuron projection morphogenesis	0.0101481		Cluster31	Secondary malignant neoplasm of lung	0.0466779
Cluster19	cytokine-mediated signaling pathway	0.0143889		Cluster31	TARSAL-CARPAL COALITION SYNDROME	0.0467704
Cluster19	neuron projection development	0.0176002		Cluster31	Choriocarcinoma	0.0473529
Cluster19	cell projection morphogenesis	0.021009		Cluster31	Kidney Neoplasm	0.0473529
Cluster19	cell morphogenesis involved in differentiation	0.021009		Cluster31	Infection	0.0479865
Cluster19	transmembrane receptor protein tyrosine kinase signaling pathway	0.021009		Cluster31	Pancreatic carcinoma	0.0480189
Cluster19	immune system process	0.0222936		Cluster31	Hydrocephalus	0.0485414
Cluster19	cell part morphogenesis	0.0229189		Cluster31	Malignant neoplasm of esophagus	0.0486424
Cluster19	synaptic transmission	0.0315258		Cluster31	Hypertriglyceridemia	0.0490285
Cluster19	carbohydrate derivative metabolic process	0.0334275		Cluster31	Hyperinsulinism	0.0490285
Cluster19	cellular response to cytokine stimulus	0.0343147		Cluster31	Prostatic Intraepithelial Neoplasias	0.0490285
Cluster19	organic substance metabolic process	0.0399439		Cluster31	Cerebral Infarction	0.0490285
Cluster19	neuron development	0.0406005		Cluster31	Immunologic Deficiency Syndromes	0.0490285
Cluster19	protein complex assembly	0.0453212		Cluster31	Epilepsy, Temporal Lobe	0.0490285
Cluster19	chemotaxis	0.0453212		Cluster31	Polycystic Ovary Syndrome	0.0490285
Cluster19	taxis	0.0453212		Cluster31	Chronic kidney disease stage 5	0.0490285
Cluster19	protein complex biogenesis	0.0460313		Cluster31	Ischemic Cerebrovascular Accident	0.0490285
Cluster19	regulation of immune response	0.046189		Cluster31	Hepatitis C	0.0490285
Cluster2	mitochondrial electron transport, NADH to ubiquinone	9.58416e-22		Cluster31	Cleft Lip	0.0490285
Cluster2	ATP synthesis coupled electron transport	5.66494e-21		Cluster31	Constipation	0.0490285
Cluster2	mitochondrial ATP synthesis coupled electron transport	5.66494e-21		Cluster31	Immune System Diseases	0.0490285
Cluster2	oxidative phosphorylation	1.26673e-20		Cluster31	Transient Ischemic Attack	0.0490285
Cluster2	respiratory electron transport chain	3.86813e-18		Cluster31	Fanconi Anemia	0.0491816
Cluster2	electron transport chain	1.54997e-17		Cluster31	Refractory cancer	0.0493277
Cluster2	cellular respiration	1.80956e-17		Cluster31	Reperfusion Injury	0.0493277
Cluster2	energy derivation by oxidation of organic compounds	3.62772e-14		Cluster31	Acute lymphocytic leukemia	0.0494142
Cluster2	generation of precursor metabolites and energy	2.47587e-13		Cluster31	Congenital chromosomal disease	0.0494142
Cluster2	oxidation-reduction process	9.99076e-13		Cluster31	Anaplastic thyroid carcinoma	0.0494142
Cluster2	phosphorylation	2.24479e-11		Cluster31	Multiple malignancy	0.0494142
Cluster2	phosphate-containing compound metabolic process	1.12067e-10		Cluster31	Inflammation	0.0495641
Cluster2	phosphorus metabolic process	1.12067e-10		Cluster34	Carcinogenesis	9.72816e-08
Cluster2	small molecule metabolic process	1.80935e-10		Cluster34	Colorectal Carcinoma	6.30858e-06
Cluster2	cellular metabolic process	0.00894611		Cluster34	Retinoblastoma	6.30858e-06
Cluster2	purine ribonucleoside triphosphate metabolic process	0.0145942		Cluster34	Anoxia	1.44949e-05
Cluster2	ribonucleoside triphosphate metabolic process	0.0145942		Cluster34	Mammary Neoplasms	1.44949e-05
Cluster2	purine nucleoside triphosphate metabolic process	0.0145942		Cluster34	Osteosarcoma of bone	2.10972e-05
Cluster2	nucleoside triphosphate metabolic process	0.0145942		Cluster34	Prostate carcinoma	2.17525e-05
Cluster2	purine ribonucleotide metabolic process	0.0145942		Cluster34	Malignant neoplasm of ovary	2.53131e-05
Cluster2	metabolic process	0.0145942		Cluster34	Prostatic Neoplasms	2.53131e-05
Cluster2	ribonucleotide metabolic process	0.0145942		Cluster34	Malignant tumor of colon	2.83822e-05
Cluster2	purine nucleotide metabolic process	0.0221042		Cluster34	Ovarian Carcinoma	2.86134e-05
Cluster2	purine-containing compound metabolic process	0.024022		Cluster34	Triple Negative Breast Neoplasms	3.11774e-05
Cluster2	nucleoside phosphate metabolic process	0.0301245		Cluster34	Malignant neoplasm of prostate	3.25674e-05
Cluster2	nucleotide metabolic process	0.0301245		Cluster34	Osteosarcoma	3.29104e-05
Cluster2	nucleobase-containing small molecule metabolic process	0.0353612		Cluster34	Colorectal Cancer	5.00074e-05
Cluster2	heterocycle metabolic process	0.045415		Cluster34	Colon Carcinoma	5.48897e-05
Cluster20	anatomical structure morphogenesis	1.36764e-05		Cluster34	melanoma	5.48897e-05
Cluster20	developmental process	0.000121268		Cluster34	Breast Carcinoma	5.48897e-05
Cluster20	multicellular organismal process	0.000136347		Cluster34	Lung Neoplasms	5.8326e-05
Cluster20	cell death	0.000136347		Cluster34	Lymphoma	7.10225e-05
Cluster20	death	0.000136347		Cluster34	Grade III Chondrosarcoma	9.7896e-05
Cluster20	apoptotic process	0.000149977		Cluster34	Malignant neoplasm of breast	9.7896e-05
Cluster20	programmed cell death	0.000149977		Cluster34	Carcinoma breast stage IV	9.7896e-05
Cluster20	anatomical structure development	0.000184278		Cluster34	Precursor T-Cell Lymphoblastic Leukemia-Lymphoma	9.7896e-05
Cluster20	multicellular organismal development	0.000222973		Cluster34	Thrombocythemia, Essential	9.7896e-05
Cluster20	regulation of catalytic activity	0.000331044		Cluster34	Peyronie Disease	0.000101271
Cluster20	cell projection organization	0.000788604		Cluster34	Tumor Angiogenesis	0.000129116
Cluster20	regulation of Ras protein signal transduction	0.000788604		Cluster34	Sporadic Breast Carcinoma	0.000129116
Cluster20	cellular component organization at cellular level	0.000788604		Cluster34	Adenomatous Polyposis Coli	0.000132009
Cluster20	regulation of molecular function	0.000816027		Cluster34	Glioblastoma Multiforme	0.000152958
Cluster20	positive regulation of molecular function	0.000816027		Cluster34	Leukemogenesis	0.00016708
Cluster20	cell-cell adhesion	0.0010404		Cluster34	Giant Cell Tumor of Bone	0.000170857
Cluster20	cellular component organization or biogenesis at cellular level	0.00104203		Cluster34	Esophageal Neoplasms	0.00018328
Cluster20	regulation of Rho protein signal transduction	0.00108188		Cluster34	Malignant neoplasm of esophagus	0.000194904
Cluster20	cellular component assembly at cellular level	0.00110616		Cluster34	Disseminated Malignant Neoplasm	0.000194904
Cluster20	cellular developmental process	0.00129402		Cluster34	Scleroderma	0.000194904
Cluster20	system development	0.00136229		Cluster34	Epithelial ovarian cancer	0.000212436
Cluster20	cellular component disassembly involved in apoptotic process	0.00136229		Cluster34	Fibroid Tumor	0.000230681
Cluster20	cellular component organization	0.00137075		Cluster34	Uterine Cervical Neoplasm	0.00023766
Cluster20	protein phosphorylation	0.0013952		Cluster34	Hepatitis B	0.00023766
Cluster20	positive regulation of cellular process	0.0014262		Cluster34	Seminoma	0.00023766
Cluster20	cellular component organization or biogenesis	0.00195521		Cluster34	Uterine Fibroids	0.000280536
Cluster20	regulation of small GTPase mediated signal transduction	0.00195521		Cluster34	Adenocarcinoma Of Esophagus	0.000280536
Cluster20	regulation of GTPase activity	0.00200668		Cluster34	Secondary malignant neoplasm of liver	0.000283033
Cluster20	regulation of GTP catabolic process	0.00204674		Cluster34	Liver neoplasms	0.000299999
Cluster20	positive regulation of catalytic activity	0.00204674		Cluster34	Adenoma	0.00036078
Cluster20	regulation of cellular component organization	0.00241		Cluster34	Leukemia, Lymphocytic, Acute, L1	0.000377183
Cluster20	cell differentiation	0.00243316		Cluster34	Esophageal carcinoma	0.000377183
Cluster20	cellular component assembly	0.00246429		Cluster34	Meningioma	0.000377183
Cluster20	gland morphogenesis	0.00253459		Cluster34	Nodular melanoma	0.000445576
Cluster20	regulation of nucleotide catabolic process	0.0027438		Cluster34	Glioblastoma	0.000456251
Cluster20	regulation of purine nucleotide catabolic process	0.0027438		Cluster34	Hepatocarcinogenesis	0.000499729
Cluster20	cell-cell junction organization	0.0027438		Cluster34	Small cell carcinoma of lung	0.000499729
Cluster20	phosphorylation	0.0027438		Cluster34	Addictive Behavior	0.000501652
Cluster20	regulation of protein kinase activity	0.00288052		Cluster34	Carcinoma of bladder	0.000501652
Cluster20	regulation of Ras GTPase activity	0.00288052		Cluster34	Burkitt Lymphoma	0.000501652
Cluster20	biological adhesion	0.00288052		Cluster34	Adenocarcinoma	0.000510395
Cluster20	cell adhesion	0.00288052		Cluster34	Herpes Simplex Infections	0.000510395
Cluster20	adherens junction organization	0.00308403		Cluster34	Ataxia Telangiectasia	0.000510395
Cluster20	positive regulation of biological process	0.00313668		Cluster34	Malignant neoplasm of pancreas	0.000510395
Cluster20	regulation of kinase activity	0.00328151		Cluster34	Barrett Esophagus	0.000526597
Cluster20	regulation of transferase activity	0.00368429		Cluster34	Ductal Breast Carcinoma	0.000565138
Cluster20	regulation of endocytosis	0.00368429		Cluster34	Pancreatic Ductal Adenocarcinoma	0.000565895
Cluster20	neurogenesis	0.00393702		Cluster34	Urothelial Carcinoma	0.000579547
Cluster20	nervous system development	0.00400623		Cluster34	Follicular adenoma	0.000613999
Cluster20	homophilic cell adhesion	0.00414505		Cluster34	Sporadic Burkitt's lymphoma	0.000685772
Cluster20	regulation of localization	0.00426494		Cluster34	solid tumor	0.000685772
Cluster20	cellular component biogenesis	0.00426494		Cluster34	Pancreatic carcinoma	0.000685772
Cluster20	cell junction assembly	0.00426494		Cluster34	leukemia	0.00068927
Cluster20	cell communication	0.004491		Cluster34	Malignant neoplasm of stomach	0.00068927
Cluster20	cellular component disassembly at cellular level	0.00468398		Cluster34	Non-Small Cell Lung Carcinoma	0.00068927
Cluster20	cellular component disassembly	0.00468398		Cluster34	Bladder Neoplasm	0.000733737
Cluster20	regulation of cellular catabolic process	0.00468398		Cluster34	Rectal Carcinoma	0.000770756
Cluster20	blood vessel development	0.00503821		Cluster34	Colonic Neoplasms	0.000899276
Cluster20	phosphate-containing compound metabolic process	0.00521171		Cluster34	Low Grade Lymphoma (neoplasm)	0.000899276
Cluster20	phosphorus metabolic process	0.00521171		Cluster34	Multiple malignancy	0.000925844
Cluster20	tube morphogenesis	0.0053727		Cluster34	Multiple Myeloma	0.000964219
Cluster20	positive regulation of protein kinase activity	0.00611525		Cluster34	Tumor Progression	0.0010693
Cluster20	endocytosis	0.006214		Cluster34	Glioma	0.00128619
Cluster20	vasculature development	0.00644015		Cluster34	Malignant neoplasm of urinary bladder	0.00132602
Cluster20	cell projection morphogenesis	0.00665392		Cluster34	Neoplasm Metastasis	0.00135351
Cluster20	cell junction organization	0.00665392		Cluster34	Medulloblastoma	0.00137493
Cluster20	regulation of response to stimulus	0.00677531		Cluster34	Hyperactive behavior	0.00138128
Cluster20	positive regulation of kinase activity	0.00701713		Cluster34	Thyroid Neoplasm	0.00141502
Cluster20	cell part morphogenesis	0.00705245		Cluster34	Squamous cell carcinoma of the head and neck	0.00145308
Cluster20	actin cytoskeleton organization	0.00705245		Cluster34	Pheochromocytoma	0.00150761
Cluster20	positive regulation of transferase activity	0.00727506		Cluster34	Diffuse Large B-Cell Lymphoma	0.0015544
Cluster20	positive regulation of apoptotic process	0.00732746		Cluster34	Carcinoma, Transitional Cell	0.00156842
Cluster20	morphogenesis of a branching structure	0.00732746		Cluster34	Polycythemia Vera	0.00156842
Cluster20	signal transduction	0.00732746		Cluster34	Pituitary Adenoma	0.00161332
Cluster20	cytoskeleton organization	0.00742236		Cluster34	Phyllodes Tumor	0.00161805
Cluster20	positive regulation of programmed cell death	0.00742236		Cluster34	Endometrial adenocarcinoma	0.00161805
Cluster20	generation of neurons	0.00750917		Cluster34	Invasive Ductal Breast Carcinoma	0.00166748
Cluster20	regulation of Rho GTPase activity	0.00761332		Cluster34	Endometrial Carcinoma	0.00175532
Cluster20	positive regulation of cell death	0.00761332		Cluster34	Alzheimer's Disease	0.00197649
Cluster20	signaling	0.00761332		Cluster34	prostatitis	0.00200504
Cluster20	regulation of catabolic process	0.00787383		Cluster34	breast adenocarcinoma	0.00200504
Cluster20	intracellular signal transduction	0.00787383		Cluster34	Metastasis from malignant tumor of prostate	0.00200504
Cluster20	regulation of neuron projection development	0.00787383		Cluster34	Central neuroblastoma	0.00216076
Cluster20	regulation of purine nucleotide metabolic process	0.0078962		Cluster34	Precursor B-cell lymphoblastic leukemia	0.00226686
Cluster20	protein autophosphorylation	0.0078962		Cluster34	Fanconi Anemia	0.00226686
Cluster20	regulation of nucleotide metabolic process	0.00800942		Cluster34	Malignant neoplasm of endometrium	0.00227185
Cluster20	blood vessel morphogenesis	0.00864195		Cluster34	Cleft Palate	0.00227185
Cluster20	regulation of protein phosphorylation	0.00864195		Cluster34	Uterine Corpus Cancer	0.00227185
Cluster20	cardiovascular system development	0.00882855		Cluster34	Stomach Carcinoma	0.0022733
Cluster20	circulatory system development	0.00882855		Cluster34	Breast Cancer, Familial	0.0022733
Cluster20	regulation of osteoblast differentiation	0.00939459		Cluster34	Degenerative polyarthritis	0.0022733
Cluster20	actin filament-based process	0.00965132		Cluster34	Fibrous Dysplasia	0.00227912
Cluster20	cellular response to stimulus	0.0101542		Cluster34	Prostate cancer recurrent	0.00227912
Cluster20	regulation of hydrolase activity	0.0106377		Cluster34	Squamous cell carcinoma	0.00229507
Cluster20	regulation of phosphorylation	0.0114309		Cluster34	Tumor Initiation	0.00242018
Cluster20	regulation of vesicle-mediated transport	0.0114309		Cluster34	Adenocarcinoma of rectum	0.00242018
Cluster20	regulation of signaling	0.0117096		Cluster34	Juvenile polyposis syndrome	0.00242018
Cluster20	regulation of signal transduction	0.0126944		Cluster34	Malignant neoplasm of male breast	0.00242018
Cluster20	regulation of anatomical structure morphogenesis	0.0126944		Cluster34	Salivary Gland Pleomorphic Adenoma	0.00242018
Cluster20	regulation of primary metabolic process	0.013008		Cluster34	Malignant Glioma	0.00242817
Cluster20	regulation of nucleobase-containing compound metabolic process	0.0132753		Cluster34	Metastatic Prostate Carcinoma	0.00253061
Cluster20	cell morphogenesis	0.0132753		Cluster34	Endometrioma	0.00254735
Cluster20	regulation of cell projection organization	0.0135615		Cluster34	Sarcoma	0.00254735
Cluster20	cell development	0.0137878		Cluster34	Osteoporosis, Postmenopausal	0.00265403
Cluster20	tissue development	0.0142661		Cluster34	Vascular lesions	0.00265403
Cluster20	regulation of protein serine/threonine kinase activity	0.0146696		Cluster34	Precancerous Conditions	0.00266411
Cluster20	regulation of cellular metabolic process	0.0146696		Cluster34	Orbital separation excessive	0.00277749
Cluster20	locomotion	0.0150019		Cluster34	Cystic Fibrosis	0.00277749
Cluster20	regulation of phosphate metabolic process	0.0150019		Cluster34	Neuroblastoma	0.0028049
Cluster20	regulation of phosphorus metabolic process	0.0150019		Cluster34	Persistent embryonic structure	0.00285699
Cluster20	regulation of transport	0.0155252		Cluster34	Ductal Carcinoma	0.00286596
Cluster20	tissue morphogenesis	0.0159502		Cluster34	MYELODYSPLASTIC SYNDROME	0.00303245
Cluster20	tube development	0.0159502		Cluster34	Bone neoplasms	0.00308898
Cluster20	cell projection assembly	0.0159502		Cluster34	Hemangiosarcoma	0.00308898
Cluster20	regulation of nitrogen compound metabolic process	0.0159502		Cluster34	Kaposi Sarcoma	0.00312283
Cluster20	neuron projection development	0.0159502		Cluster34	androgen independent prostate cancer	0.00313938
Cluster20	induction of apoptosis	0.0159542		Cluster34	Adrenal Cushing's syndrome	0.00313938
Cluster20	embryo development	0.0159951		Cluster34	Bronchogenic Carcinoma	0.00313938
Cluster20	cellular component morphogenesis	0.0160039		Cluster34	Adenocarcinoma of large intestine	0.0032262
Cluster20	induction of programmed cell death	0.0160039		Cluster34	Malignant neoplasm of thyroid	0.00359324
Cluster20	regulation of cellular process	0.0160978		Cluster34	Mucinous Adenocarcinoma	0.00361551
Cluster20	positive regulation of protein phosphorylation	0.016232		Cluster34	Bone Marrow Diseases	0.00366957
Cluster20	gland development	0.016232		Cluster34	Lymphoma, Non-Hodgkin	0.00369812
Cluster20	connective tissue development	0.016232		Cluster34	Pulmonary Hypertension	0.00371462
Cluster20	localization	0.016232		Cluster34	Idiopathic pulmonary arterial hypertension	0.00377636
Cluster20	regulation of cell adhesion	0.0173589		Cluster34	Craniofacial Abnormalities	0.00377636
Cluster20	intracellular protein kinase cascade	0.0173589		Cluster34	Carcinoma of lung	0.00377636
Cluster20	regulation of cell morphogenesis	0.0173589		Cluster34	Congenital chromosomal disease	0.00379178
Cluster20	positive regulation of phosphorylation	0.0173589		Cluster34	Hypoxia	0.00381456
Cluster20	peptidyl-amino acid modification	0.0179128		Cluster34	Mild Mental Retardation	0.00392057
Cluster20	regulation of cell motility	0.0182565		Cluster34	B-Cell Lymphomas	0.00392057
Cluster20	positive regulation of phosphate metabolic process	0.0183601		Cluster34	Acute leukemia	0.00403943
Cluster20	positive regulation of phosphorus metabolic process	0.0183601		Cluster34	Short philtrum	0.00439274
Cluster20	regulation of cytoskeleton organization	0.0185458		Cluster34	Malignant neoplasm of lung	0.00446325
Cluster20	branching morphogenesis of a tube	0.019741		Cluster34	FANCONI ANEMIA, COMPLEMENTATION GROUP A (disorder)	0.00457203
Cluster20	vesicle-mediated transport	0.019741		Cluster34	Atrial Premature Complexes	0.00457203
Cluster20	regulation of developmental process	0.0211906		Cluster34	Intestinal Cancer	0.00463613
Cluster20	regulation of cell death	0.0214754		Cluster34	Spinal Muscular Atrophy	0.00470821
Cluster20	regulation of cellular component movement	0.0216776		Cluster34	Secondary malignant neoplasm of lung	0.0047615
Cluster20	regulation of locomotion	0.0225259		Cluster34	Adult Acute Lymphocytic Leukemia	0.00484714
Cluster20	regulation of protein modification process	0.0225259		Cluster34	Hepatopulmonary Syndrome	0.00484714
Cluster20	regulation of ossification	0.0240689		Cluster34	Germ cell tumor	0.00488834
Cluster20	regulation of neuron differentiation	0.0244928		Cluster34	Adenovirus Infections	0.00497283
Cluster20	positive regulation of cell differentiation	0.0244928		Cluster34	Infection	0.00497283
Cluster20	morphogenesis of an epithelium	0.0249897		Cluster34	Cushing Syndrome	0.00513163
Cluster20	chordate embryonic development	0.0250248		Cluster34	Teratoma	0.00513163
Cluster20	positive regulation of cellular component organization	0.0254408		Cluster34	Primary malignant neoplasm of lung	0.00544818
Cluster20	positive regulation of macromolecule metabolic process	0.0259007		Cluster34	Renal Cell Carcinoma	0.00545822
Cluster20	embryo development ending in birth or egg hatching	0.0259844		Cluster34	Gastrointestinal Stromal Tumors	0.00545822
Cluster20	in utero embryonic development	0.0260611		Cluster34	liposarcoma	0.00545822
Cluster20	neuron development	0.0264053		Cluster34	Invasive carcinoma of breast	0.00554402
Cluster20	regulation of organelle organization	0.0269642		Cluster34	ovarian neoplasm	0.005664
Cluster20	positive regulation of cellular metabolic process	0.0279184		Cluster34	Acquired Immunodeficiency Syndrome	0.00582629
Cluster20	response to stimulus	0.0279184		Cluster34	Nervous System Neoplasms	0.00603857
Cluster20	regulation of cell differentiation	0.0292315		Cluster34	Epithelioma	0.00606626
Cluster20	regulation of actin cytoskeleton organization	0.0292567		Cluster34	Leukemia, Myelocytic, Acute	0.00623675
Cluster20	regulation of metabolic process	0.0315881		Cluster34	Liver carcinoma	0.00623675
Cluster20	cell morphogenesis involved in neuron differentiation	0.0315881		Cluster34	Gastric Adenocarcinoma	0.00623675
Cluster20	regulation of cell morphogenesis involved in differentiation	0.0318027		Cluster34	Thyroid carcinoma	0.00632488
Cluster20	regulation of biological process	0.0320188		Cluster34	Pancreatic intraepithelial neoplasia	0.00632488
Cluster20	cellular protein complex assembly	0.0326819		Cluster34	Pituitary Neoplasms	0.00641086
Cluster20	neuron projection morphogenesis	0.0338463		Cluster34	Li-Fraumeni Syndrome	0.00652523
Cluster20	regulation of actin filament-based process	0.0342228		Cluster34	Mammary Ductal Carcinoma	0.00652523
Cluster20	positive regulation of metabolic process	0.0377794		Cluster34	Uterine Neoplasms	0.00652523
Cluster20	cell surface receptor signaling pathway	0.0377794		Cluster34	Gallbladder Carcinoma	0.00662411
Cluster20	cellular membrane organization	0.0385597		Cluster34	Squamous cell carcinoma of esophagus	0.00662411
Cluster20	membrane organization	0.0388113		Cluster34	Noninfiltrating Intraductal Carcinoma	0.00662411
Cluster20	regulation of neurogenesis	0.0390636		Cluster34	Hepatitis	0.00673323
Cluster20	cell migration	0.0392168		Cluster34	Neoplasms, Germ Cell and Embryonal	0.00673788
Cluster20	Wnt receptor signaling pathway	0.0394691		Cluster34	Parathyroid Neoplasms	0.00673788
Cluster20	protein complex assembly	0.0404948		Cluster34	Von Hippel-Lindau Syndrome	0.00695663
Cluster20	positive regulation of protein modification process	0.0404948		Cluster34	Chronic active hepatitis	0.00710187
Cluster20	epithelial tube morphogenesis	0.0404948		Cluster34	Mood Disorders	0.00714397
Cluster20	chemotaxis	0.0404948		Cluster34	Papilloma	0.00745824
Cluster20	taxis	0.0404948		Cluster34	PACHYONYCHIA CONGENITA 3	0.00761913
Cluster20	protein complex biogenesis	0.0410311		Cluster34	Abnormal behavior	0.0076506
Cluster20	MAPK cascade	0.0413544		Cluster34	Carcinoma, Pancreatic Ductal	0.00777229
Cluster20	neuron differentiation	0.0418894		Cluster34	Failure to Thrive	0.00777229
Cluster20	axon guidance	0.0418894		Cluster34	Congenital Abnormality	0.00777229
Cluster20	organelle organization	0.0424864		Cluster34	Fibrosarcoma	0.00777229
Cluster20	regulation of apoptotic process	0.0433019		Cluster34	Secondary malignant neoplasm of bone	0.00777229
Cluster20	regulation of programmed cell death	0.0446242		Cluster34	Brain Neoplasms	0.00784354
Cluster20	muscle structure development	0.0454752		Cluster34	Acute lymphocytic leukemia	0.00784354
Cluster20	cell motility	0.0468368		Cluster34	Aortic Aneurysm, Thoracic	0.00796276
Cluster20	localization of cell	0.0468368		Cluster34	Nijmegen Breakage Syndrome	0.00796276
Cluster20	regulation of cellular protein metabolic process	0.0476558		Cluster34	Lip and Oral Cavity Carcinoma	0.00830155
Cluster20	regulation of nervous system development	0.0478992		Cluster34	Nerve Sheath Tumors	0.00831204
Cluster20	cell morphogenesis involved in differentiation	0.0478992		Cluster34	Rhabdoid Tumor	0.00831204
Cluster20	transmembrane receptor protein tyrosine kinase signaling pathway	0.0478992		Cluster34	Conventional (Clear Cell) Renal Cell Carcinoma	0.00831883
Cluster20	positive regulation of cell migration	0.0483436		Cluster34	Hamartoma	0.00865836
Cluster21	amino acid activation	1.13926e-26		Cluster34	ovarian adenocarcinoma	0.00865836
Cluster21	tRNA aminoacylation	1.13926e-26		Cluster34	Neoplastic Cell Transformation	0.00865836
Cluster21	tRNA aminoacylation for protein translation	1.13926e-26		Cluster34	Adenocarcinoma of pancreas	0.00895973
Cluster21	tRNA metabolic process	2.25529e-22		Cluster34	neurofibroma	0.0090296
Cluster21	cellular amino acid metabolic process	7.34262e-16		Cluster34	Carcinoma, Papillary	0.00912865
Cluster21	ncRNA metabolic process	6.58113e-15		Cluster34	Breast Fibrocystic Disease	0.00939769
Cluster21	carboxylic acid metabolic process	4.02197e-12		Cluster34	Microsatellite Instability	0.00939769
Cluster21	oxoacid metabolic process	4.02197e-12		Cluster34	Endometriosis	0.00951427
Cluster21	organic acid metabolic process	4.06585e-12		Cluster34	Liver Cirrhosis	0.0095508
Cluster21	cellular ketone metabolic process	4.15565e-12		Cluster34	Papillary thyroid carcinoma	0.0095508
Cluster21	translation	6.99269e-12		Cluster34	Benign melanocytic nevus	0.0095508
Cluster21	small molecule metabolic process	4.75234e-07		Cluster34	Eating Disorders	0.0095508
Cluster21	RNA metabolic process	1.83396e-05		Cluster34	Hereditary Malignant Neoplasm	0.0095508
Cluster21	cellular protein metabolic process	3.48957e-05		Cluster34	Isolated cases	0.0095508
Cluster21	gene expression	8.14729e-05		Cluster34	aggressive cancer	0.0095508
Cluster21	protein metabolic process	0.000160567		Cluster34	Malignant lymphoma, lymphocytic, intermediate differentiation, diffuse	0.0100272
Cluster21	nucleic acid metabolic process	0.000209777		Cluster34	Cardiomyopathy, Familial Idiopathic	0.0101712
Cluster21	cellular nitrogen compound metabolic process	0.000244834		Cluster34	Pituitary Diseases	0.0101962
Cluster21	nitrogen compound metabolic process	0.000258021		Cluster34	Malignant tumor of cervix	0.0102298
Cluster21	cellular macromolecule biosynthetic process	0.000621924		Cluster34	Skin Carcinogenesis	0.0103663
Cluster21	macromolecule biosynthetic process	0.000640021		Cluster34	DYSFUNCTION - SKIN DISORDERS	0.0103663
Cluster21	nucleobase-containing compound metabolic process	0.000760914		Cluster34	Colorectal Neoplasms	0.0104039
Cluster21	primary metabolic process	0.00104004		Cluster34	Heart Diseases	0.0104418
Cluster21	cellular macromolecule metabolic process	0.00203227		Cluster34	Adenocarcinoma of lung (disorder)	0.0104418
Cluster21	cellular biosynthetic process	0.00260137		Cluster34	Malignant neoplasm of gastrointestinal tract	0.0105707
Cluster21	metabolic process	0.00260137		Cluster34	Hurthle Cell Tumor	0.0106004
Cluster21	biosynthetic process	0.00309929		Cluster34	Malignant neoplasm of brain	0.0107087
Cluster21	macromolecule metabolic process	0.00449819		Cluster34	Alveolar rhabdomyosarcoma	0.0110374
Cluster21	cellular metabolic process	0.0279416		Cluster34	Cutaneous Melanoma	0.011124
Cluster22	translational initiation	9.4147e-22		Cluster34	Stomach Neoplasms	0.0115752
Cluster22	translation	4.45495e-17		Cluster34	Early-Stage Breast Carcinoma	0.0119866
Cluster22	regulation of translational initiation	7.20475e-17		Cluster34	Bone Diseases	0.0121926
Cluster22	regulation of translation	3.66602e-13		Cluster34	Hypertrophic Cardiomyopathy	0.0124876
Cluster22	posttranscriptional regulation of gene expression	2.53732e-10		Cluster34	Chordoma	0.0129746
Cluster22	cellular macromolecule biosynthetic process	1.48417e-08		Cluster34	Diabetes Mellitus, Non-Insulin-Dependent	0.0131331
Cluster22	macromolecule biosynthetic process	1.48417e-08		Cluster34	Schizophrenia	0.0132579
Cluster22	cellular protein metabolic process	3.59333e-08		Cluster34	Adenocarcinoma of colon	0.0133449
Cluster22	gene expression	1.1166e-07		Cluster34	Paraganglioma	0.0133449
Cluster22	cellular biosynthetic process	1.61204e-07		Cluster34	cervical cancer	0.0136215
Cluster22	biosynthetic process	2.15969e-07		Cluster34	Follicular thyroid carcinoma	0.0136215
Cluster22	protein metabolic process	2.32215e-07		Cluster34	Multiple tumors	0.0137541
Cluster22	nuclear-transcribed mRNA poly(A) tail shortening	2.04914e-06		Cluster34	Skin Neoplasms	0.0137541
Cluster22	nuclear-transcribed mRNA catabolic process, deadenylation-dependent decay	5.09558e-05		Cluster34	Progressive Neoplastic Disease	0.0141522
Cluster22	cellular macromolecule metabolic process	0.000114317		Cluster34	Progressive cGVHD	0.0141522
Cluster22	regulation of cellular protein metabolic process	0.000114317		Cluster34	Gilles de la Tourette syndrome	0.0141522
Cluster22	mRNA 3'-end processing	0.000166687		Cluster34	Chronic Lymphocytic Leukemia	0.0142312
Cluster22	RNA 3'-end processing	0.000201862		Cluster34	Adrenal Gland Neoplasms	0.0152722
Cluster22	nuclear-transcribed mRNA catabolic process	0.000260632		Cluster34	Prostatic Intraepithelial Neoplasias	0.0155445
Cluster22	regulation of protein metabolic process	0.000265715		Cluster34	Cardiac fibrosis	0.0157866
Cluster22	mRNA catabolic process	0.000265715		Cluster34	Malignant neoplasm of skin	0.0159041
Cluster22	macromolecule metabolic process	0.000265715		Cluster34	Cleft Lip	0.016195
Cluster22	regulation of cellular macromolecule biosynthetic process	0.000301631		Cluster34	Invasive Carcinoma	0.0164936
Cluster22	primary metabolic process	0.000358243		Cluster34	Refractory cancer	0.0164936
Cluster22	RNA catabolic process	0.000358243		Cluster34	Liver and Intrahepatic Biliary Tract Carcinoma	0.016636
Cluster22	regulation of macromolecule biosynthetic process	0.000360186		Cluster34	invasive cancer	0.0167949
Cluster22	negative regulation of translation	0.000566049		Cluster34	Neoplasm Recurrence, Local	0.0170989
Cluster22	regulation of gene expression	0.000586794		Cluster34	Keloid	0.0170989
Cluster22	regulation of cellular biosynthetic process	0.000586794		Cluster34	polyps	0.0176636
Cluster22	regulation of biosynthetic process	0.000643224		Cluster34	Diabetes	0.0178435
Cluster22	metabolic process	0.000916946		Cluster34	Systemic Scleroderma	0.0178435
Cluster22	cytokine-mediated signaling pathway	0.00174409		Cluster34	Stromal Neoplasm	0.0183303
Cluster22	cellular metabolic process	0.00197194		Cluster34	Diabetes Mellitus	0.0184023
Cluster22	cellular response to cytokine stimulus	0.00410402		Cluster34	Squamous cell carcinoma of skin	0.0184776
Cluster22	cellular response to organic substance	0.00410402		Cluster34	Actinic keratosis	0.018727
Cluster22	interspecies interaction between organisms	0.0061338		Cluster34	Rhabdomyosarcoma	0.018727
Cluster22	regulation of macromolecule metabolic process	0.00929185		Cluster34	Adenocarcinoma of prostate	0.018727
Cluster22	response to cytokine stimulus	0.00929185		Cluster34	Hematologic Neoplasms	0.0190371
Cluster22	regulation of primary metabolic process	0.0121497		Cluster34	Malignant neoplasm of gallbladder	0.0190475
Cluster22	regulation of cellular metabolic process	0.0138893		Cluster34	Mesothelioma	0.0193264
Cluster22	cellular response to chemical stimulus	0.0143604		Cluster34	Malignant Peripheral Nerve Sheath Tumor	0.0193705
Cluster22	RNA metabolic process	0.0221588		Cluster34	Steroid Sulfatase Deficiency Disease	0.0196551
Cluster22	mRNA processing	0.0241366		Cluster34	Thyroid Gland Follicular Adenoma	0.0196551
Cluster22	mRNA metabolic process	0.0241366		Cluster34	Cardiomegaly	0.0197983
Cluster22	cellular macromolecule catabolic process	0.0246477		Cluster34	Bloom Syndrome	0.0197983
Cluster22	regulation of metabolic process	0.0323512		Cluster34	Decreased projection of midface	0.0197983
Cluster22	macromolecule catabolic process	0.0353982		Cluster34	Hemangioma	0.0197983
Cluster22	response to organic substance	0.0412105		Cluster34	Hypotrophic midface	0.0197983
Cluster23	nuclear-transcribed mRNA poly(A) tail shortening	6.55476e-24		Cluster34	Midface retrusion	0.0197983
Cluster23	nuclear-transcribed mRNA catabolic process, deadenylation-dependent decay	4.37492e-20		Cluster34	Prostatic Hyperplasia	0.0197983
Cluster23	mRNA 3'-end processing	1.2581e-18		Cluster34	Small midface	0.0197983
Cluster23	RNA 3'-end processing	1.84966e-18		Cluster34	Kidney Neoplasm	0.0198967
Cluster23	nuclear-transcribed mRNA catabolic process	5.2768e-15		Cluster34	Hepatitis, Chronic	0.0202604
Cluster23	mRNA catabolic process	6.24644e-15		Cluster34	Melanocytic nevus	0.0202604
Cluster23	RNA catabolic process	1.34551e-14		Cluster34	Skin endocrine disorder	0.0202604
Cluster23	mRNA processing	5.39529e-12		Cluster34	Arteriosclerosis	0.0206651
Cluster23	RNA processing	1.73074e-10		Cluster34	Sepsis	0.0206937
Cluster23	mRNA metabolic process	4.33525e-10		Cluster34	Mammary Neoplasms, Experimental	0.0209267
Cluster23	cellular macromolecule catabolic process	4.37769e-10		Cluster34	Muscular Dystrophy, Duchenne	0.0209267
Cluster23	macromolecule catabolic process	1.08266e-09		Cluster34	Hyperkyphosis	0.0211921
Cluster23	cellular catabolic process	1.1521e-07		Cluster34	Nevus	0.0211921
Cluster23	catabolic process	3.27164e-07		Cluster34	Squamous cell carcinoma of lung	0.0211921
Cluster23	RNA metabolic process	4.52534e-05		Cluster34	Merkel cell carcinoma	0.0217282
Cluster23	regulation of cellular macromolecule biosynthetic process	0.000130845		Cluster34	Mixed Salivary Gland Tumor	0.0217282
Cluster23	gene expression	0.000135946		Cluster34	Ichthyosis, X-Linked	0.0223861
Cluster23	regulation of macromolecule biosynthetic process	0.000147479		Cluster34	Renal fibrosis	0.0233674
Cluster23	regulation of gene expression	0.000213546		Cluster34	Hereditary Nonpolyposis Colorectal Cancer	0.0236774
Cluster23	regulation of cellular biosynthetic process	0.000213546		Cluster34	Cancer of Head and Neck	0.0236774
Cluster23	regulation of biosynthetic process	0.000224903		Cluster34	Malignant neoplasm of mouth	0.0245828
Cluster23	nucleic acid metabolic process	0.000236011		Cluster34	Neoplasms, Second Primary	0.0245999
Cluster23	regulation of transcription, DNA-dependent	0.000413243		Cluster34	Aortic Valve Stenosis	0.0249493
Cluster23	regulation of RNA biosynthetic process	0.000422901		Cluster34	Animal Mammary Neoplasms	0.0249635
Cluster23	regulation of RNA metabolic process	0.000490273		Cluster34	Increase in blood pressure	0.0255675
Cluster23	nucleobase-containing compound metabolic process	0.000650263		Cluster34	Keratoconus	0.0261915
Cluster23	cellular nitrogen compound metabolic process	0.00094819		Cluster34	Kyphosis deformity of spine	0.0261915
Cluster23	nitrogen compound metabolic process	0.000984131		Cluster34	Tumor Promotion	0.0269075
Cluster23	regulation of nucleobase-containing compound metabolic process	0.00149682		Cluster34	Acute Promyelocytic Leukemia	0.0273496
Cluster23	transcription, DNA-dependent	0.00158054		Cluster34	Peripheral T-Cell Lymphoma	0.0275394
Cluster23	regulation of macromolecule metabolic process	0.00165108		Cluster34	Lymphoid leukemia	0.0275394
Cluster23	regulation of nitrogen compound metabolic process	0.00174189		Cluster34	Mouth Neoplasms	0.0275394
Cluster23	cellular macromolecule metabolic process	0.00180878		Cluster34	Uveal melanoma	0.0278333
Cluster23	cellular macromolecule biosynthetic process	0.00187396		Cluster34	Infarction, Middle Cerebral Artery	0.0278333
Cluster23	regulation of primary metabolic process	0.00187396		Cluster34	Polycystic Kidney Diseases	0.0278333
Cluster23	macromolecule biosynthetic process	0.00187396		Cluster34	leiomyosarcoma	0.0278333
Cluster23	RNA biosynthetic process	0.00188613		Cluster34	Nephroblastoma	0.0279533
Cluster23	regulation of cellular metabolic process	0.00200228		Cluster34	Hepatoblastoma	0.0281303
Cluster23	macromolecule metabolic process	0.00311301		Cluster34	Carcinoma, Small Cell	0.0283512
Cluster23	regulation of metabolic process	0.00451502		Cluster34	Astrocytoma	0.0283512
Cluster23	cellular biosynthetic process	0.00497775		Cluster34	Head and Neck Neoplasms	0.0284719
Cluster23	biosynthetic process	0.00567218		Cluster34	Precursor Cell Lymphoblastic Leukemia Lymphoma	0.0292029
Cluster23	cellular metabolic process	0.0117187		Cluster34	Thymoma	0.0293839
Cluster23	primary metabolic process	0.0125232		Cluster34	Adenocarcinoma, Clear Cell	0.0294806
Cluster23	metabolic process	0.0225559		Cluster34	Differentiated Thyroid Gland Carcinoma	0.0294806
Cluster24	cellular component morphogenesis	2.67179e-09		Cluster34	Hodgkin Disease	0.0294806
Cluster24	axon guidance	2.67179e-09		Cluster34	Metabolic Diseases	0.0297032
Cluster24	axonogenesis	2.67179e-09		Cluster34	Malignant neoplasm of liver	0.0299003
Cluster24	cell projection morphogenesis	2.67179e-09		Cluster34	Cervix carcinoma	0.0299003
Cluster24	cell morphogenesis involved in differentiation	2.67179e-09		Cluster34	Pulmonary Emphysema	0.0299003
Cluster24	cell morphogenesis	2.67179e-09		Cluster34	Severe Combined Immunodeficiency	0.0303864
Cluster24	cell part morphogenesis	2.67179e-09		Cluster34	Hyperglycemia	0.0311682
Cluster24	cell projection organization	2.99395e-09		Cluster34	Traditional Serrated Adenoma	0.0312776
Cluster24	cell morphogenesis involved in neuron differentiation	2.99395e-09		Cluster34	Blast Phase	0.0312776
Cluster24	neuron projection morphogenesis	3.70022e-09		Cluster34	Insulin Resistance	0.0317745
Cluster24	chemotaxis	7.37966e-09		Cluster34	Adult T-Cell Lymphoma/Leukemia	0.0319453
Cluster24	taxis	7.37966e-09		Cluster34	Rheumatoid Arthritis	0.0323667
Cluster24	neuron projection development	9.98704e-09		Cluster34	Cognition Disorders	0.0331126
Cluster24	anatomical structure morphogenesis	5.41729e-08		Cluster34	Obesity	0.0331126
Cluster24	actin filament-based process	5.41729e-08		Cluster34	tumor vasculature	0.0331126
Cluster24	neuron development	6.42976e-08		Cluster34	Secondary malignant neoplasm of lymph node	0.0331126
Cluster24	locomotion	6.42976e-08		Cluster34	Brachydactyly	0.0338879
Cluster24	cell development	1.02948e-07		Cluster34	Aortic Valve Insufficiency	0.0344379
Cluster24	neuron differentiation	3.44589e-07		Cluster34	Hepatitis A	0.0344379
Cluster24	regulation of actin filament-based process	1.11412e-06		Cluster34	Overweight	0.0344379
Cluster24	neurogenesis	2.07417e-06		Cluster34	Short stature	0.0345365
Cluster24	response to external stimulus	2.23089e-06		Cluster34	Metastatic melanoma	0.0347996
Cluster24	cellular developmental process	3.98631e-06		Cluster34	Depressive Symptoms	0.0359538
Cluster24	generation of neurons	7.42156e-06		Cluster34	Small head	0.0360709
Cluster24	regulation of actin cytoskeleton organization	9.725e-06		Cluster34	Congenital Heart Defects	0.0383697
Cluster24	cell differentiation	1.33371e-05		Cluster34	Familial lichen amyloidosis	0.0383827
Cluster24	regulation of cytoskeleton organization	1.38087e-05		Cluster34	Benign Prostatic Hyperplasia	0.0409116
Cluster24	cytoskeleton organization	1.50988e-05		Cluster34	Hepatitis C	0.0410109
Cluster24	nervous system development	2.28661e-05		Cluster34	Familial multiple trichoepitheliomata	0.0417154
Cluster24	actin cytoskeleton organization	2.3873e-05		Cluster34	Peritonitis	0.0417154
Cluster24	multicellular organismal process	2.88441e-05		Cluster34	Malignant Pleural Mesothelioma	0.0417154
Cluster24	cellular component organization at cellular level	4.85392e-05		Cluster34	Turner Syndrome	0.0444379
Cluster24	regulation of cellular component biogenesis	5.36524e-05		Cluster34	Myocardial Infarction	0.0446769
Cluster24	cellular component organization or biogenesis at cellular level	8.47176e-05		Cluster34	Nasopharyngeal carcinoma	0.0446769
Cluster24	regulation of protein complex disassembly	0.00012065		Cluster34	Lymphoma, T-Cell, Cutaneous	0.0447267
Cluster24	system development	0.000124867		Cluster34	Virus Diseases	0.0455048
Cluster24	regulation of cellular component organization	0.000136467		Cluster34	Allergic rhinitis (disorder)	0.0458228
Cluster24	cellular component organization	0.00016077		Cluster34	Curvature of spine	0.0463795
Cluster24	anatomical structure development	0.000174506		Cluster34	Diabetes Mellitus, Experimental	0.0463795
Cluster24	actin filament capping	0.00022275		Cluster34	Ureteral obstruction	0.0464555
Cluster24	multicellular organismal development	0.00022275		Cluster34	Anaplasia	0.0468511
Cluster24	cellular component organization or biogenesis	0.000253943		Cluster34	Hamartoma Syndrome, Multiple	0.047197
Cluster24	negative regulation of actin filament depolymerization	0.000255518		Cluster34	Myeloid Leukemia, Chronic	0.047197
Cluster24	cell-substrate adhesion	0.00032466		Cluster34	Neuroendocrine Tumors	0.047197
Cluster24	protein localization in membrane	0.00032466		Cluster34	Metabolic Syndrome X	0.0474693
Cluster24	regulation of cellular component movement	0.000338666		Cluster34	Primary Effusion Lymphoma	0.047705
Cluster24	regulation of actin filament depolymerization	0.000338666		Cluster34	Myeloid Leukemia	0.047705
Cluster24	negative regulation of cytoskeleton organization	0.000356852		Cluster34	Intrahepatic Cholangiocarcinoma	0.0484907
Cluster24	regulation of actin filament polymerization	0.000438433		Cluster34	Endometrial Neoplasms	0.0487532
Cluster24	negative regulation of actin filament polymerization	0.000442172		Cluster35	EAR, PATELLA, SHORT STATURE SYNDROME	3.0254e-06
Cluster24	regulation of organelle organization	0.000528541		Cluster35	Malignant lymphoma, lymphocytic, intermediate differentiation, diffuse	3.0254e-06
Cluster24	response to stimulus	0.000552482		Cluster35	Chronic Lymphocytic Leukemia	3.33552e-06
Cluster24	regulation of actin polymerization or depolymerization	0.000574688		Cluster35	Cutaneous Melanoma	9.11192e-05
Cluster24	regulation of actin filament length	0.00060253		Cluster35	Birth length less than 3rd percentile	0.000128183
Cluster24	regulation of cellular component size	0.000667156		Cluster35	Epithelial ovarian cancer	0.000128183
Cluster24	developmental process	0.000669699		Cluster35	Meningioma	0.000171496
Cluster24	actin filament bundle assembly	0.000771267		Cluster35	Dwarfism	0.000171496
Cluster24	negative regulation of protein polymerization	0.000958361		Cluster35	Thyroid Neoplasm	0.000171496
Cluster24	negative regulation of protein complex disassembly	0.00103458		Cluster35	Pancreatic carcinoma, familial	0.000171496
Cluster24	protein localization in plasma membrane	0.00103458		Cluster35	Medulloblastoma	0.00017294
Cluster24	regulation of protein polymerization	0.00114518		Cluster35	Malignant neoplasm of ovary	0.00017294
Cluster24	regulation of localization	0.00143366		Cluster35	Pituitary carcinoma	0.000197504
Cluster24	negative regulation of cellular component organization	0.00165794		Cluster35	Dysplastic Nevus	0.000224644
Cluster24	actin filament organization	0.00170744		Cluster35	Adenomyoma	0.00022644
Cluster24	regulation of locomotion	0.00189222		Cluster35	Atypical polypoid adenomyoma	0.00022644
Cluster24	response to chemical stimulus	0.00248544		Cluster35	Pituitary growth hormone cell adenoma	0.00022644
Cluster24	biological adhesion	0.0025811		Cluster35	Retinoblastoma	0.000244898
Cluster24	cell adhesion	0.0025811		Cluster35	Head and Neck Neoplasms	0.000244898
Cluster24	exocytosis	0.00267207		Cluster35	Squamous cell carcinoma of tongue	0.000302309
Cluster24	regulation of anatomical structure size	0.00278064		Cluster35	Traditional Serrated Adenoma	0.000324563
Cluster24	vesicle-mediated transport	0.00278789		Cluster35	Endometrial Hyperplasia	0.000405292
Cluster24	cellular component movement	0.0028165		Cluster35	Testicular Germ Cell Tumor	0.000405292
Cluster24	negative regulation of protein complex assembly	0.00306695		Cluster35	Neoplasm Recurrence, Local	0.00040934
Cluster24	actin filament-based movement	0.00323749		Cluster35	Leukemia, Lymphocytic, Acute, L1	0.000415437
Cluster24	plasma membrane organization	0.00387706		Cluster35	Growth hormone excess	0.000536314
Cluster24	regulation of anatomical structure morphogenesis	0.00401636		Cluster35	Increased serum parathyroid hormone	0.000536314
Cluster24	regulation of cell morphogenesis	0.00460186		Cluster35	Refractory anemias	0.000536314
Cluster24	negative regulation of organelle organization	0.00624311		Cluster35	Hyperparathyroidism	0.000750475
Cluster24	cell junction organization	0.00635228		Cluster35	Female Breast Carcinoma	0.000867004
Cluster24	regulation of cell motility	0.00657418		Cluster35	keratoacanthoma	0.000867004
Cluster24	cellular localization	0.0066728		Cluster35	Bladder Neoplasm	0.000879023
Cluster24	cellular component disassembly involved in apoptotic process	0.00746704		Cluster35	Hematologic Neoplasms	0.000999235
Cluster24	regulation of cell shape	0.00746704		Cluster35	Intestinal Neoplasms	0.00102261
Cluster24	regulation of protein complex assembly	0.00958854		Cluster35	Squamous cell carcinoma	0.00102261
Cluster24	cellular component assembly at cellular level	0.0099764		Cluster35	Fibromyxosarcoma	0.0010352
Cluster24	cell-matrix adhesion	0.0106794		Cluster35	Multiple Endocrine Neoplasia	0.00107173
Cluster24	positive regulation of cytoskeleton organization	0.0128355		Cluster35	Carcinoma of extrahepatic bile duct	0.00114215
Cluster24	positive regulation of organelle organization	0.0129033		Cluster35	Malignant lymphoma - lymphoplasmacytic	0.00114215
Cluster24	secretion by cell	0.0161165		Cluster35	Ovarian Carcinoma	0.00114215
Cluster24	cell-cell junction organization	0.0170592		Cluster35	Malignant neoplasm of breast	0.00114215
Cluster24	gliogenesis	0.0184042		Cluster35	Tumors of Adrenal Cortex	0.00122422
Cluster24	muscle cell development	0.0184042		Cluster35	Parathyroid hyperplasia	0.00122422
Cluster24	muscle structure development	0.0206153		Cluster35	Slender, gracile long tubular bones	0.00122422
Cluster24	negative regulation of cellular component movement	0.0229686		Cluster35	Malignant neoplasm of urinary bladder	0.00123979
Cluster24	regulation of cell migration	0.0229686		Cluster35	Carcinoma of bladder	0.00142673
Cluster24	response to wounding	0.026434		Cluster35	Lymphoma, Non-Hodgkin	0.00142673
Cluster24	cellular protein localization	0.0334857		Cluster35	Precursor T-Cell Lymphoblastic Leukemia-Lymphoma	0.00151155
Cluster24	cellular macromolecule localization	0.0334857		Cluster35	Skin toxicity	0.00152341
Cluster24	cell death	0.0334857		Cluster35	Diffuse Large B-Cell Lymphoma	0.0015396
Cluster24	macromolecule localization	0.0334857		Cluster35	Multiple Endocrine Neoplasia Type 1	0.0015396
Cluster24	death	0.0334857		Cluster35	Carcinoma, Transitional Cell	0.00159352
Cluster24	secretion	0.0334857		Cluster35	Fibrosis	0.00159352
Cluster24	wound healing	0.0341825		Cluster35	Gastrointestinal Stromal Tumors	0.00160723
Cluster24	anatomical structure formation involved in morphogenesis	0.0352312		Cluster35	Benign melanocytic nevus	0.00173703
Cluster24	protein localization	0.0375539		Cluster35	Carcinoid Tumor	0.00173703
Cluster24	localization	0.0383041		Cluster35	Burkitt Lymphoma	0.00185325
Cluster24	organelle organization	0.0384467		Cluster35	Mouth Neoplasms	0.00227136
Cluster24	positive regulation of cellular component organization	0.0405566		Cluster35	Uveal melanoma	0.00230667
Cluster24	establishment of localization in cell	0.0489673		Cluster35	Multiple Myeloma	0.00251099
Cluster25	enzyme linked receptor protein signaling pathway	5.77664e-17		Cluster35	Thyroid carcinoma	0.00251099
Cluster25	transmembrane receptor protein tyrosine kinase signaling pathway	2.15072e-15		Cluster35	Endocrine Gland Neoplasms	0.00268011
Cluster25	peptidyl-tyrosine modification	2.37422e-14		Cluster35	Malignant Glioma	0.00270651
Cluster25	peptidyl-tyrosine phosphorylation	2.37422e-14		Cluster35	Blast Phase	0.00282182
Cluster25	cellular component movement	2.33975e-13		Cluster35	Hereditary Melanoma	0.00354946
Cluster25	cell surface receptor signaling pathway	3.453e-13		Cluster35	Malignant mesothelioma	0.00374323
Cluster25	cell migration	3.10309e-12		Cluster35	Non-Small Cell Lung Carcinoma	0.00418094
Cluster25	cell motility	1.01348e-11		Cluster35	TARSAL-CARPAL COALITION SYNDROME	0.00418094
Cluster25	localization of cell	1.01348e-11		Cluster35	insulinoma	0.00418094
Cluster25	phosphate-containing compound metabolic process	1.83932e-11		Cluster35	Undifferentiated carcinoma	0.00418094
Cluster25	phosphorus metabolic process	1.83932e-11		Cluster35	Polycystic Ovary Syndrome	0.00426066
Cluster25	anatomical structure development	2.41546e-11		Cluster35	Astrocytoma, low grade	0.00429728
Cluster25	regulation of response to stimulus	2.41546e-11		Cluster35	B-Cell Lymphomas	0.00463697
Cluster25	developmental process	1.3905e-10		Cluster35	Laryngeal Squamous Cell Carcinoma	0.00509438
Cluster25	leukocyte migration	2.02669e-10		Cluster35	Laryngeal neoplasm	0.00514631
Cluster25	locomotion	2.1792e-10		Cluster35	Prolactinoma	0.00514631
Cluster25	signal transduction	6.09391e-10		Cluster35	Mesothelioma (malignant, clinical disorder) (disorder)	0.00514631
Cluster25	system development	6.09391e-10		Cluster35	Endometrial Carcinoma	0.00514631
Cluster25	protein phosphorylation	1.03863e-09		Cluster35	Colorectal Neoplasms	0.00514631
Cluster25	multicellular organismal development	1.46028e-09		Cluster35	Neuroendocrine Tumors	0.00519458
Cluster25	regulation of signal transduction	1.91212e-09		Cluster35	Nevus	0.00533199
Cluster25	phosphorylation	1.91212e-09		Cluster35	Hematopoietic Neoplasms	0.00533199
Cluster25	cellular response to endogenous stimulus	2.0687e-09		Cluster35	Merkel cell carcinoma	0.00549111
Cluster25	cellular response to hormone stimulus	2.0687e-09		Cluster35	Carcinoma of urinary bladder, superficial	0.00558834
Cluster25	cellular response to peptide hormone stimulus	2.09054e-09		Cluster35	Hereditary Breast and Ovarian Cancer Syndrome	0.00558834
Cluster25	signaling	2.45381e-09		Cluster35	Germ cell tumor	0.00573256
Cluster25	positive regulation of cell activation	2.56256e-09		Cluster35	Malignant neoplasm of esophagus	0.00573256
Cluster25	cell communication	5.46615e-09		Cluster35	Cardiac Arrest	0.00577132
Cluster25	regulation of body fluid levels	6.715e-09		Cluster35	Congenital small ears	0.00577132
Cluster25	regulation of signaling	7.18773e-09		Cluster35	cervical cancer	0.00609024
Cluster25	regulation of immune system process	9.90265e-09		Cluster35	Malignant neoplasm of female breast	0.00609024
Cluster25	nerve growth factor receptor signaling pathway	1.10897e-08		Cluster35	Cervix carcinoma	0.00634826
Cluster25	positive regulation of immune system process	1.19922e-08		Cluster35	liposarcoma	0.00634826
Cluster25	ERBB signaling pathway	1.31839e-08		Cluster35	Human papilloma virus infection	0.00634826
Cluster25	epidermal growth factor receptor signaling pathway	1.31839e-08		Cluster35	Ataxia Telangiectasia	0.00653449
Cluster25	positive regulation of leukocyte activation	1.57962e-08		Cluster35	Non-Neoplastic Disorder	0.00655904
Cluster25	response to growth hormone stimulus	2.29604e-08		Cluster35	Adenocarcinoma	0.0066174
Cluster25	multicellular organismal process	5.13635e-08		Cluster35	Carcinosarcoma	0.00694754
Cluster25	response to wounding	5.13635e-08		Cluster35	Pituitary-dependent Cushing's disease	0.00694754
Cluster25	positive regulation of T cell activation	5.44864e-08		Cluster35	Carcinogenesis	0.00736556
Cluster25	positive regulation of lymphocyte activation	6.98452e-08		Cluster35	Embryonal Carcinoma	0.00738449
Cluster25	response to endogenous stimulus	7.29171e-08		Cluster35	Sarcoma	0.00738449
Cluster25	immune response-regulating cell surface receptor signaling pathway	7.29171e-08		Cluster35	Neuroectodermal Tumor, Primitive	0.00738449
Cluster25	cellular response to organic substance	8.90729e-08		Cluster35	Li-Fraumeni Syndrome	0.00749641
Cluster25	response to hormone stimulus	9.40611e-08		Cluster35	Uterine Neoplasms	0.00749641
Cluster25	response to peptide hormone stimulus	9.40611e-08		Cluster35	Neoplasms, Second Primary	0.00752169
Cluster25	cell projection organization	9.40611e-08		Cluster35	leukemia	0.00800539
Cluster25	cellular response to stimulus	1.0186e-07		Cluster35	Hereditary pancreatitis	0.0082105
Cluster25	regulation of cell activation	1.17963e-07		Cluster35	Precursor cell lymphoblastic lymphoma	0.0082105
Cluster25	intracellular signal transduction	1.25879e-07		Cluster35	Papilloma	0.00830776
Cluster25	blood coagulation	1.4926e-07		Cluster35	Precancerous Conditions	0.00894858
Cluster25	coagulation	1.4926e-07		Cluster35	synovial sarcoma	0.00906878
Cluster25	hemostasis	1.63701e-07		Cluster35	Conventional (Clear Cell) Renal Cell Carcinoma	0.00940403
Cluster25	cellular response to chemical stimulus	1.88988e-07		Cluster35	MYELOPROLIFERATIVE SYNDROME, TRANSIENT	0.00940403
Cluster25	nervous system development	1.90754e-07		Cluster35	Cancer of Head and Neck	0.00940403
Cluster25	cellular response to growth hormone stimulus	1.90754e-07		Cluster35	Rhabdoid Tumor	0.00977505
Cluster25	ephrin receptor signaling pathway	1.90754e-07		Cluster35	Myeloid Leukemia, Chronic	0.00977505
Cluster25	growth hormone receptor signaling pathway	1.90754e-07		Cluster35	Biliary Tract Cancer	0.0100361
Cluster25	wound healing	2.74448e-07		Cluster35	Marginal Zone B-Cell Lymphoma	0.0101116
Cluster25	regulation of leukocyte activation	3.26541e-07		Cluster35	Esophageal carcinoma	0.010229
Cluster25	biological adhesion	3.26541e-07		Cluster35	Urothelial Carcinoma	0.0105356
Cluster25	cell adhesion	3.26541e-07		Cluster35	Tumor Progression	0.0107011
Cluster25	regulation of immune response	3.59286e-07		Cluster35	Ewings sarcoma	0.0112372
Cluster25	intracellular protein kinase cascade	4.02919e-07		Cluster35	Malignant tumor of cervix	0.0112372
Cluster25	regulation of T cell activation	4.57529e-07		Cluster35	Malignant neoplasm of thyroid	0.0112388
Cluster25	peptidyl-amino acid modification	4.57529e-07		Cluster35	Leukemia, T-Cell	0.0116531
Cluster25	neuron projection development	4.57529e-07		Cluster35	precancerous lesions	0.0117659
Cluster25	immune response-regulating signaling pathway	4.70267e-07		Cluster35	Glioma	0.0117832
Cluster25	platelet activation	5.2195e-07		Cluster35	Cervical Squamous Cell Carcinoma	0.0117832
Cluster25	protein autophosphorylation	5.78754e-07		Cluster35	Skin Carcinogenesis	0.0117832
Cluster25	regulation of lymphocyte activation	6.89542e-07		Cluster35	Congenital chromosomal disease	0.0117832
Cluster25	cellular developmental process	7.75651e-07		Cluster35	Small cell carcinoma of lung	0.0119183
Cluster25	cellular protein modification process	7.75651e-07		Cluster35	Prostatic Neoplasms	0.0137238
Cluster25	protein modification process	7.75651e-07		Cluster35	Esophageal Neoplasms	0.0139328
Cluster25	neuron differentiation	7.96329e-07		Cluster35	Early-Stage Breast Carcinoma	0.0139515
Cluster25	anatomical structure morphogenesis	8.23835e-07		Cluster35	Anaplastic astrocytoma	0.0139515
Cluster25	cellular response to fibroblast growth factor stimulus	8.88742e-07		Cluster35	Intrahepatic Cholangiocarcinoma	0.0139515
Cluster25	response to fibroblast growth factor stimulus	8.88742e-07		Cluster35	Acromegaly	0.014371
Cluster25	regulation of cell adhesion	1.18131e-06		Cluster35	Parathyroid Adenoma	0.014371
Cluster25	cellular response to growth factor stimulus	1.29658e-06		Cluster35	Sporadic Breast Carcinoma	0.0148278
Cluster25	cell differentiation	1.48152e-06		Cluster35	Chromosome Aberrations	0.0148278
Cluster25	signal complex assembly	1.56197e-06		Cluster35	Philadelphia chromosome-positive acute lymphoblastic leukemia	0.0153976
Cluster25	response to organic substance	1.60067e-06		Cluster35	Adenocarcinoma of large intestine	0.015443
Cluster25	macromolecule modification	1.60067e-06		Cluster35	Adenoma	0.0154772
Cluster25	chemotaxis	1.65469e-06		Cluster35	Microstomia	0.0156493
Cluster25	taxis	1.65469e-06		Cluster35	Multiple tumors	0.0156493
Cluster25	regulation of biological quality	1.72378e-06		Cluster35	Lymphoma	0.0161895
Cluster25	cell activation	1.9493e-06		Cluster35	Squamous cell carcinoma of esophagus	0.0171115
Cluster25	T cell costimulation	1.9493e-06		Cluster35	Endometrial Neoplasms	0.017304
Cluster25	lymphocyte costimulation	1.9493e-06		Cluster35	Soft Tissue Neoplasms	0.017304
Cluster25	positive regulation of biological process	2.15022e-06		Cluster35	DNA Damage	0.0179108
Cluster25	antigen receptor-mediated signaling pathway	2.15022e-06		Cluster35	Adenomatous Polyposis Coli	0.0179941
Cluster25	response to growth factor stimulus	2.37292e-06		Cluster35	Intrauterine retardation	0.0182993
Cluster25	response to chemical stimulus	2.62532e-06		Cluster35	Invasive Carcinoma	0.0182993
Cluster25	neuron development	3.00704e-06		Cluster35	Infant, Small for Gestational Age	0.0184206
Cluster25	JAK-STAT cascade involved in growth hormone signaling pathway	3.25319e-06		Cluster35	Multiple malignancy	0.0184206
Cluster25	cell projection morphogenesis	3.25319e-06		Cluster35	invasive cancer	0.0184206
Cluster25	response to external stimulus	3.29692e-06		Cluster35	Peptic Ulcer	0.0185472
Cluster25	immune response-activating cell surface receptor signaling pathway	3.57667e-06		Cluster35	polyps	0.0190293
Cluster25	cell part morphogenesis	4.07725e-06		Cluster35	Hereditary gingival fibromatosis	0.0190468
Cluster25	neuron projection morphogenesis	4.07725e-06		Cluster35	Malignant neoplasm of prostate	0.0194311
Cluster25	fibroblast growth factor receptor signaling pathway	4.73221e-06		Cluster35	Acute lymphocytic leukemia	0.0194311
Cluster25	response to stimulus	4.73221e-06		Cluster35	Chronic ulcerative colitis	0.0194311
Cluster25	T cell receptor signaling pathway	4.9392e-06		Cluster35	Squamous cell carcinoma of skin	0.0199382
Cluster25	regulation of cell-substrate adhesion	5.39565e-06		Cluster35	Ductal Breast Carcinoma	0.0199382
Cluster25	generation of neurons	5.87348e-06		Cluster35	Brain Neoplasms	0.0203902
Cluster25	cytokine-mediated signaling pathway	8.53877e-06		Cluster35	Mucinous Adenocarcinoma	0.0203902
Cluster25	regulation of cell morphogenesis	8.62456e-06		Cluster35	Liver carcinoma	0.0203902
Cluster25	regulation of cellular component organization	8.63064e-06		Cluster35	Uterine Cervical Neoplasm	0.0203902
Cluster25	axonogenesis	9.11258e-06		Cluster35	Follicular adenoma	0.0208421
Cluster25	positive regulation of cellular process	9.19216e-06		Cluster35	Colorectal Carcinoma	0.0215683
Cluster25	regulation of cell-matrix adhesion	1.00232e-05		Cluster35	Kidney Neoplasm	0.0215683
Cluster25	neurogenesis	1.18291e-05		Cluster35	Bloom Syndrome	0.0220097
Cluster25	response to cytokine stimulus	1.24047e-05		Cluster35	Glioblastoma	0.0220542
Cluster25	cell morphogenesis involved in neuron differentiation	1.71351e-05		Cluster35	Melanocytic nevus	0.0220542
Cluster25	immune response-activating signal transduction	1.78052e-05		Cluster35	Skin endocrine disorder	0.0220542
Cluster25	regulation of small GTPase mediated signal transduction	1.94527e-05		Cluster35	Gastroesophageal reflux disease	0.0234993
Cluster25	immune system process	2.36878e-05		Cluster35	Heartburn	0.0252428
Cluster25	insulin receptor signaling pathway	2.45724e-05		Cluster35	Waldenstrom Macroglobulinemia	0.0252428
Cluster25	integrin-mediated signaling pathway	2.78052e-05		Cluster35	Leukemogenesis	0.025376
Cluster25	axon guidance	2.83033e-05		Cluster35	Renal carcinoma	0.025376
Cluster25	regulation of cell shape	3.01568e-05		Cluster35	Breast Carcinoma	0.025376
Cluster25	cell morphogenesis	3.1363e-05		Cluster35	Adult Acute Lymphocytic Leukemia	0.025376
Cluster25	activation of protein kinase activity	3.74545e-05		Cluster35	Liver regeneration disorder	0.025376
Cluster25	positive regulation of gamma-delta T cell activation	4.06525e-05		Cluster35	Neuroblastoma	0.025525
Cluster25	regulation of gamma-delta T cell activation	4.06525e-05		Cluster35	Invasive Ductal Breast Carcinoma	0.0255548
Cluster25	localization	4.61901e-05		Cluster35	Colorectal Cancer	0.0256531
Cluster25	cellular response to cytokine stimulus	5.05708e-05		Cluster35	Leukemia, B-Cell	0.0256531
Cluster25	cellular component morphogenesis	6.35482e-05		Cluster35	Acoustic Neuroma	0.0270455
Cluster25	regulation of interferon-gamma-mediated signaling pathway	7.76738e-05		Cluster35	Plasmacytoma	0.0270455
Cluster25	regulation of response to interferon-gamma	7.76738e-05		Cluster35	Pancreatic Neoplasm	0.0281951
Cluster25	cell morphogenesis involved in differentiation	7.93323e-05		Cluster35	Lymphoid leukemia	0.0299071
Cluster25	multi-organism process	9.13785e-05		Cluster35	Peripheral T-Cell Lymphoma	0.0300467
Cluster25	regulation of Ras protein signal transduction	0.000103079		Cluster35	Nephroblastoma	0.0300467
Cluster25	organ development	0.000105068		Cluster35	ovarian neoplasm	0.0301243
Cluster25	activation of immune response	0.00011307		Cluster35	Hepatoblastoma	0.0305019
Cluster25	cellular protein metabolic process	0.000125832		Cluster35	Precursor Cell Lymphoblastic Leukemia Lymphoma	0.0305087
Cluster25	JAK-STAT cascade	0.000127783		Cluster35	Cervical Intraepithelial Neoplasia	0.0306277
Cluster25	positive regulation of immune response	0.000132105		Cluster35	Hodgkin Disease	0.0306277
Cluster25	cellular response to insulin stimulus	0.000135016		Cluster35	Carcinoma, Endometrioid	0.0306277
Cluster25	cell-cell adhesion	0.000188373		Cluster35	Carcinoma, Small Cell	0.0306277
Cluster25	regulation of Ras GTPase activity	0.000200458		Cluster35	Malignant neoplasm of lung	0.0306307
Cluster25	positive regulation of actin filament polymerization	0.000200458		Cluster35	Fibroid Tumor	0.0310129
Cluster25	regulation of actin cytoskeleton organization	0.000200458		Cluster35	Pancreatic Ductal Adenocarcinoma	0.0326396
[truncated: 3,534 more rows]

## Sheet: S3F. Enrich detail (dNeuron)
Supplmentary Table S3F. Full list of Arboretum-hic clusters of dNeuron enriched for functional pathways and diseases
* Tested for enrichment of Gene Ontology (GO) biological processes and diseases in DisGeNet using FDR corrected hypergeometric test
* FDR: Benjamini-Hochberg-corrected hypergeometric p-value (<0.05)
Cluster	Term	FDR		Cluster	Disease	FDR
Cluster1	vascular endothelial growth factor receptor signaling pathway	4.96591e-11		Cluster1	Retinal ischemia	1.65519e-07
Cluster1	vascular endothelial growth factor signaling pathway	5.41618e-08		Cluster1	Avascular retina	3.09362e-06
Cluster1	blood vessel development	1.87773e-07		Cluster1	Truncus Arteriosus, Persistent	6.13302e-06
Cluster1	vasculature development	2.3789e-07		Cluster1	Metastatic Renal Cell Cancer	3.70361e-05
Cluster1	cellular response to vascular endothelial growth factor stimulus	3.11e-07		Cluster1	Retinopathy of Prematurity	6.86098e-05
Cluster1	cell migration	1.00163e-06		Cluster1	Hot flushes	7.25036e-05
Cluster1	chemotaxis	1.00163e-06		Cluster1	Pathologic Neovascularization	7.25036e-05
Cluster1	taxis	1.00163e-06		Cluster1	Polymyositis	0.000125422
Cluster1	patterning of blood vessels	1.00163e-06		Cluster1	Mesothelioma (malignant, clinical disorder) (disorder)	0.00022291
Cluster1	cell motility	1.09859e-06		Cluster1	Tumor Angiogenesis	0.00022291
Cluster1	localization of cell	1.09859e-06		Cluster1	tumor vasculature	0.000258797
Cluster1	locomotion	1.8612e-06		Cluster1	Varicose Ulcer	0.000489644
Cluster1	dichotomous subdivision of an epithelial terminal unit	1.8612e-06		Cluster1	Malignant mesothelioma	0.000489644
Cluster1	cardiovascular system development	1.96043e-06		Cluster1	Sentinel node (disorder)	0.000489644
Cluster1	circulatory system development	1.96043e-06		Cluster1	Lymphedema	0.000518695
Cluster1	angiogenesis	2.07284e-06		Cluster1	Colorectal cancer metastatic	0.000518695
Cluster1	endothelial cell migration	3.63814e-06		Cluster1	Tumor Progression	0.000518695
Cluster1	positive regulation of endothelial cell proliferation	4.24658e-06		Cluster1	Disseminated Malignant Neoplasm	0.000518695
Cluster1	morphogenesis of a branching epithelium	5.91341e-06		Cluster1	Neoplasm Invasiveness	0.000518695
Cluster1	semaphorin-plexin signaling pathway	7.56892e-06		Cluster1	Angiogenic Switch	0.000861089
Cluster1	cellular component movement	7.92444e-06		Cluster1	Infection of amniotic sac and membranes	0.000924711
Cluster1	blood vessel morphogenesis	8.63727e-06		Cluster1	Chorioamnionitis	0.00101572
Cluster1	morphogenesis of a branching structure	1.04164e-05		Cluster1	Pancreatic Neoplasm	0.00102328
Cluster1	positive regulation of vascular endothelial growth factor receptor signaling pathway	1.04164e-05		Cluster1	Fetal Membranes, Premature Rupture	0.00102328
Cluster1	regulation of endothelial cell proliferation	1.12592e-05		Cluster1	Diabetic Retinopathy	0.00102328
Cluster1	branching involved in salivary gland morphogenesis	1.4765e-05		Cluster1	solid tumor	0.00108615
Cluster1	regulation of vascular endothelial growth factor receptor signaling pathway	1.72487e-05		Cluster1	Sarcoidosis	0.00127578
Cluster1	anatomical structure formation involved in morphogenesis	1.86518e-05		Cluster1	Testicular Neoplasms	0.00134053
Cluster1	regulation of cell migration	2.20694e-05		Cluster1	Hemangioma	0.00145634
Cluster1	positive regulation of cell migration	2.84432e-05		Cluster1	Experimental Organism Basal Cell Carcinoma	0.00171479
Cluster1	regulation of cellular response to growth factor stimulus	2.88084e-05		Cluster1	Pheochromocytoma	0.00171479
Cluster1	regulation of cell motility	2.88084e-05		Cluster1	Carcinoma, Lewis Lung	0.00171479
Cluster1	positive regulation of cell motility	2.90522e-05		Cluster1	Dermatomyositis	0.00171479
Cluster1	positive regulation of locomotion	3.249e-05		Cluster1	Premature Obstetric Labor	0.00184738
Cluster1	positive regulation of cellular component movement	3.42937e-05		Cluster1	Helicobacter Infections	0.00197717
Cluster1	response to external stimulus	3.44185e-05		Cluster1	Noninfiltrating Intraductal Carcinoma	0.00206588
Cluster1	regulation of cellular component movement	3.44793e-05		Cluster1	Arthropathy	0.00218911
Cluster1	regulation of locomotion	3.59944e-05		Cluster1	Anoxia	0.00237321
Cluster1	salivary gland morphogenesis	5.08879e-05		Cluster1	Glioma	0.0024691
Cluster1	salivary gland development	6.18422e-05		Cluster1	Adenocarcinoma of pancreas	0.0025882
Cluster1	positive regulation of epithelial cell proliferation	6.18422e-05		Cluster1	Thrombocythemia, Essential	0.00343756
Cluster1	regulation of anatomical structure morphogenesis	7.83424e-05		Cluster1	Neurilemmoma	0.00373054
Cluster1	morphogenesis of an epithelium	7.99333e-05		Cluster1	Age related macular degeneration	0.00373054
Cluster1	positive regulation of endothelial cell migration	8.3664e-05		Cluster1	Premature Birth	0.00384311
Cluster1	branching morphogenesis of a tube	8.38532e-05		Cluster1	Pre-Eclampsia	0.00395801
Cluster1	exocrine system development	9.58201e-05		Cluster1	Well Differentiated Oligodendroglioma	0.00445964
Cluster1	pattern specification process	0.000115661		Cluster1	Endometriosis	0.00446467
Cluster1	regulation of angiogenesis	0.000116602		Cluster1	Malignant neoplasm of pancreas	0.00446467
Cluster1	transmembrane receptor protein tyrosine kinase signaling pathway	0.00012888		Cluster1	Eclampsia	0.0049855
Cluster1	heart development	0.00018693		Cluster1	Germ cell tumor	0.0049855
Cluster1	axon guidance	0.000193155		Cluster1	Rheumatoid Arthritis	0.0049855
Cluster1	positive regulation of cell proliferation	0.000204735		Cluster1	Pancreatic carcinoma	0.0049855
Cluster1	neuron development	0.000238621		Cluster1	Astrocytoma	0.00505003
Cluster1	positive regulation of cell division	0.000238621		Cluster1	Lymphatic Metastasis	0.00508263
Cluster1	tissue morphogenesis	0.000238621		Cluster1	Renal carcinoma	0.00539968
Cluster1	regulation of endothelial cell migration	0.000308945		Cluster1	oligodendroglioma	0.00539968
Cluster1	regulation of epithelial cell proliferation	0.000308945		Cluster1	Colorectal Carcinoma	0.00587861
Cluster1	positive regulation of response to stimulus	0.000308945		Cluster1	Uveal melanoma	0.00683933
Cluster1	enzyme linked receptor protein signaling pathway	0.000422575		Cluster1	Myocardial Infarction	0.0072816
Cluster1	epithelium development	0.000426382		Cluster1	Gastrointestinal Carcinoid Tumor	0.00731659
Cluster1	positive regulation of angiogenesis	0.000427077		Cluster1	Carcinoma, Papillary	0.00732014
Cluster1	neuron differentiation	0.00045111		Cluster1	Cerebral Ischemia	0.00732014
Cluster1	regulation of cell division	0.00045111		Cluster1	Patent ductus arteriosus	0.00732014
Cluster1	anatomical structure morphogenesis	0.00045111		Cluster1	Malignant neoplasm of gastrointestinal tract	0.00843891
Cluster1	axonogenesis	0.000490406		Cluster1	Rectal Carcinoma	0.00869689
Cluster1	gland development	0.000548264		Cluster1	Ovarian Carcinoma	0.00951314
Cluster1	cellular response to growth factor stimulus	0.000622412		Cluster1	Myeloid Leukemia	0.00951314
Cluster1	cell morphogenesis involved in neuron differentiation	0.00062372		Cluster1	Kidney Failure	0.0096188
Cluster1	tube morphogenesis	0.000650869		Cluster1	Endothelial dysfunction	0.0096188
Cluster1	cell chemotaxis	0.000650869		Cluster1	Cystic Fibrosis	0.0096188
Cluster1	neuron projection morphogenesis	0.00066795		Cluster1	Sjogren's Syndrome	0.0096188
Cluster1	gland morphogenesis	0.000726684		Cluster1	Myeloproliferative disease	0.0113143
Cluster1	regulation of chemotaxis	0.000726684		Cluster1	Malignant neoplasm of prostate	0.0123444
Cluster1	response to growth factor stimulus	0.000750615		Cluster1	Small cell carcinoma of lung	0.0123444
Cluster1	neuron projection development	0.000984093		Cluster1	Epithelioma	0.0123444
Cluster1	tissue development	0.00108563		Cluster1	Choriocarcinoma	0.0126434
Cluster1	cell projection morphogenesis	0.0011136		Cluster1	Esophageal Neoplasms	0.013213
Cluster1	cell morphogenesis involved in differentiation	0.0011136		Cluster1	Immunologic Deficiency Syndromes	0.0140412
Cluster1	positive regulation of peptidyl-tyrosine phosphorylation	0.00115037		Cluster1	Spots on skin	0.0140412
Cluster1	adaptive immune response based on somatic recombination of immune receptors built from immunoglobulin superfamily domains	0.00116677		Cluster1	Kidney Diseases	0.0141264
Cluster1	cell part morphogenesis	0.00116677		Cluster1	Fibrosarcoma	0.0141776
Cluster1	cell surface receptor signaling pathway	0.00138018		Cluster1	Inflammation	0.0141928
Cluster1	positive regulation of biological process	0.00138329		Cluster1	Thyroid carcinoma	0.014752
Cluster1	generation of neurons	0.00143014		Cluster1	Adenocarcinoma	0.015445
Cluster1	regulation of behavior	0.00143014		Cluster1	Coronary Arteriosclerosis	0.0159057
Cluster1	response to stimulus	0.0014312		Cluster1	Retinal Diseases	0.0164658
Cluster1	regulation of multicellular organismal development	0.0014312		Cluster1	Secondary malignant neoplasm of lymph node	0.0164658
Cluster1	adaptive immune response	0.00149898		Cluster1	Brain Neoplasms	0.0165716
Cluster1	system development	0.00175765		Cluster1	Metastatic melanoma	0.018365
Cluster1	neurogenesis	0.00176295		Cluster1	Glioblastoma Multiforme	0.0186293
Cluster1	cell differentiation	0.00176803		Cluster1	Mammary Neoplasms	0.0189102
Cluster1	positive regulation of signal transduction	0.00194559		Cluster1	Malignant neoplasm of kidney	0.019033
Cluster1	cellular developmental process	0.0021575		Cluster1	Atherosclerosis	0.0199309
Cluster1	tube development	0.00216096		Cluster1	Glioblastoma	0.0205779
Cluster1	regulation of response to stimulus	0.00220933		Cluster1	Renal Cell Carcinoma	0.0213707
Cluster1	cell morphogenesis	0.00222189		Cluster1	Cirrhosis	0.0213707
Cluster1	regulation of peptidyl-tyrosine phosphorylation	0.00222189		Cluster1	Exanthema	0.0213707
Cluster1	positive regulation of cell communication	0.0023668		Cluster1	Colorectal Cancer	0.0214757
Cluster1	positive regulation of signaling	0.0023668		Cluster1	Non-Small Cell Lung Carcinoma	0.025175
Cluster1	cell projection organization	0.0023828		Cluster1	Lymphoma	0.025175
Cluster1	cell development	0.0024348		Cluster1	Colon Carcinoma	0.026716
Cluster1	regulation of cell proliferation	0.00251984		Cluster1	Conventional (Clear Cell) Renal Cell Carcinoma	0.026716
Cluster1	regulation of multicellular organismal process	0.00252393		Cluster1	Acute lymphocytic leukemia	0.026716
Cluster1	positive regulation of MAPK cascade	0.0027175		Cluster1	Osteosarcoma of bone	0.0268796
Cluster1	cellular component morphogenesis	0.0027175		Cluster1	Malignant neoplasm of mouth	0.0268796
Cluster1	anatomical structure development	0.00384372		Cluster1	Malignant neoplasm of ovary	0.0268796
Cluster1	regulation of developmental process	0.00405011		Cluster1	Secondary malignant neoplasm of liver	0.0275872
Cluster1	regulation of localization	0.00421139		Cluster1	Papillary thyroid carcinoma	0.0281949
Cluster1	localization	0.00421139		Cluster1	Malignant neoplasm of breast	0.0285468
Cluster1	multicellular organismal development	0.00424617		Cluster1	Prostate carcinoma	0.0290775
Cluster1	organ development	0.00508831		Cluster1	Meningioma	0.0300428
Cluster1	positive regulation of protein metabolic process	0.00561433		Cluster1	Acute leukemia	0.0301288
Cluster1	regulation of cell morphogenesis	0.00606122		Cluster1	Down Syndrome	0.0301288
Cluster1	response to chemical stimulus	0.00623255		Cluster1	Thyroid Neoplasm	0.0301288
Cluster1	positive regulation of immune system process	0.00631952		Cluster1	Adult T-Cell Lymphoma/Leukemia	0.0306029
Cluster1	regulation of protein metabolic process	0.00694719		Cluster1	Neoplasm Metastasis	0.0306029
Cluster1	positive regulation of protein phosphorylation	0.00694719		Cluster1	Prostatic Neoplasms	0.031695
Cluster1	positive regulation of phosphorylation	0.00755055		Cluster1	Degenerative polyarthritis	0.0321679
Cluster1	developmental process	0.00760526		Cluster1	Osteosarcoma	0.0325447
Cluster1	positive regulation of phosphate metabolic process	0.0078591		Cluster1	Pneumonia	0.0325447
Cluster1	positive regulation of phosphorus metabolic process	0.0078591		Cluster1	Cervix carcinoma	0.0326162
Cluster1	nervous system development	0.00808836		Cluster1	Non-Neoplastic Disorder	0.0347921
Cluster1	multicellular organismal process	0.00832453		Cluster1	Autoimmune Diseases	0.0347921
Cluster1	regulation of MAPK cascade	0.0120621		Cluster1	Persistent embryonic structure	0.0353275
Cluster1	regulation of neurogenesis	0.0133089		Cluster1	Arteriosclerosis	0.0417745
Cluster1	secretion by cell	0.0133413		Cluster1	Esophageal carcinoma	0.0444225
Cluster1	signaling	0.0142116		Cluster1	Colorectal Neoplasms	0.0444225
Cluster1	positive regulation of intracellular protein kinase cascade	0.0142503		Cluster1	Liver diseases	0.0460378
Cluster1	regulation of response to external stimulus	0.0156031		Cluster1	melanoma	0.0473567
Cluster1	positive regulation of protein modification process	0.0163299		Cluster1	Precursor Cell Lymphoblastic Leukemia Lymphoma	0.0493513
Cluster1	cell communication	0.0163299		Cluster10	Failure to gain weight	0.0180475
Cluster1	positive regulation of cellular process	0.0163299		Cluster10	Pediatric failure to thrive	0.0180475
Cluster1	regulation of nervous system development	0.0163299		Cluster11	Autistic Disorder	0.00229321
Cluster1	regulation of cellular protein metabolic process	0.0195042		Cluster11	Seizures	0.0477423
Cluster1	positive regulation of cellular protein metabolic process	0.0213379		Cluster12	Convulsions in the newborn	4.1521e-06
Cluster1	secretion	0.021901		Cluster12	Disturbance of consciousness	4.1521e-06
Cluster1	regulation of protein phosphorylation	0.0219484		Cluster12	Dysesthesia	4.1521e-06
Cluster1	immune response	0.0219484		Cluster12	Focal Clonic Seizures	4.4314e-06
Cluster1	regulation of system process	0.0228658		Cluster12	Tobacco Use Disorder	4.4314e-06
Cluster1	regulation of cell development	0.0230678		Cluster12	Familial benign neonatal epilepsy	2.26474e-05
Cluster1	regulation of immune system process	0.0249786		Cluster12	idiopathic epilepsy	2.52007e-05
Cluster1	regulation of cell communication	0.0255166		Cluster12	West Syndrome	3.12203e-05
Cluster1	regulation of phosphorylation	0.0256775		Cluster12	Choreoathetoid movements	0.000155026
Cluster1	signal transduction	0.0282333		Cluster12	Abnormality of vision	0.000203823
Cluster1	immune system process	0.0311029		Cluster12	Choreoathetosis	0.000203823
Cluster1	regulation of phosphate metabolic process	0.03124		Cluster12	Tonic - clonic seizures	0.000203823
Cluster1	regulation of phosphorus metabolic process	0.03124		Cluster12	Infantile Spasm	0.000229215
Cluster1	regulation of intracellular protein kinase cascade	0.039526		Cluster12	Epileptic encephalopathy	0.000256073
Cluster1	regulation of signal transduction	0.0429615		Cluster12	Idiopathic generalized epilepsy	0.000309046
Cluster1	regulation of protein modification process	0.0439655		Cluster12	Febrile Convulsions	0.000395295
Cluster1	cellular response to organic substance	0.049761		Cluster12	Enophthalmos	0.000600588
Cluster1	biological adhesion	0.0498638		Cluster12	Sunken eyes	0.000600588
Cluster1	cell adhesion	0.0498638		Cluster12	Dyskinetic syndrome	0.000679667
Cluster1	positive regulation of developmental process	0.0498638		Cluster12	Impaired cognition	0.000883749
Cluster10	rRNA metabolic process	2.4157e-12		Cluster12	Infantile onset	0.00093564
Cluster10	rRNA catabolic process	2.4157e-12		Cluster12	Schizophrenia	0.000993603
Cluster10	RNA catabolic process	3.21834e-12		Cluster12	Muscle Hypertonia	0.000993603
Cluster10	ncRNA catabolic process	3.21834e-12		Cluster12	Borderline Personality Disorder	0.00104898
Cluster10	exonucleolytic nuclear-transcribed mRNA catabolic process involved in deadenylation-dependent decay	3.7085e-12		Cluster12	Long QT Syndrome	0.00104898
Cluster10	nuclear-transcribed mRNA catabolic process, exonucleolytic	3.7085e-12		Cluster12	Myoclonus	0.00105445
Cluster10	mRNA catabolic process	8.49196e-11		Cluster12	Intellectual Disability	0.00135273
Cluster10	RNA surveillance	1.1769e-10		Cluster12	Atrophy of cerebellum	0.00190211
Cluster10	ncRNA metabolic process	1.1769e-10		Cluster12	Muscle hypotonia	0.0024433
Cluster10	nuclear-transcribed mRNA catabolic process, deadenylation-dependent decay	1.53283e-10		Cluster12	Encephalopathies	0.00398074
Cluster10	nuclear-transcribed mRNA catabolic process	3.40164e-09		Cluster12	Bronchopulmonary Dysplasia	0.00652539
Cluster10	rRNA processing	4.19013e-09		Cluster12	Ataxia	0.00652539
Cluster10	mRNA metabolic process	1.35438e-08		Cluster12	Cerebellar Ataxia	0.00681455
Cluster10	cellular macromolecule catabolic process	1.38113e-08		Cluster12	Global developmental delay	0.00778469
Cluster10	ribosome biogenesis	2.36215e-08		Cluster12	Mental Retardation	0.0129459
Cluster10	macromolecule catabolic process	2.92675e-08		Cluster12	Epilepsy	0.0216889
Cluster10	ncRNA processing	3.23971e-08		Cluster12	Cognitive delay	0.0216889
Cluster10	cellular catabolic process	6.88612e-08		Cluster12	Mental and motor retardation	0.0216889
Cluster10	catabolic process	1.99505e-07		Cluster12	Seizures	0.0252867
Cluster10	ribonucleoprotein complex biogenesis	3.99985e-07		Cluster12	Abnormal behavior	0.0255983
Cluster10	cellular component biogenesis at cellular level	5.27373e-07		Cluster12	Myopathy	0.0296655
Cluster10	RNA processing	3.12046e-06		Cluster12	Autism Spectrum Disorders	0.0330155
Cluster10	RNA metabolic process	2.44246e-05		Cluster13	Hereditary Autosomal Dominant Spastic Paraplegia	2.68662e-06
Cluster10	nucleobase-containing compound metabolic process	4.57299e-05		Cluster13	Spastic Paraplegia, Hereditary	1.9504e-05
Cluster10	cellular nitrogen compound metabolic process	7.08193e-05		Cluster13	Spastic Paraplegia	0.00174972
Cluster10	nitrogen compound metabolic process	7.41331e-05		Cluster13	Henoch-Schoenlein Purpura	0.00573559
Cluster10	nucleic acid metabolic process	0.000159149		Cluster13	Lip and Oral Cavity Carcinoma	0.0314774
Cluster10	gene expression	0.000707351		Cluster13	Muscle Spasticity	0.0362099
Cluster10	cellular component biogenesis	0.00385366		Cluster14	Anemia, Diamond-Blackfan	1.19466e-11
Cluster10	cellular macromolecule metabolic process	0.0121197		Cluster14	genital abnormal	1.19466e-11
Cluster10	cellular metabolic process	0.0134524		Cluster14	reproductive system abnormality	1.19466e-11
Cluster10	primary metabolic process	0.0142505		Cluster14	Anemia, Macrocytic	5.2954e-11
Cluster10	macromolecule metabolic process	0.0199161		Cluster14	Abnormality of the urinary system	3.98797e-10
Cluster10	metabolic process	0.0247062		Cluster14	Hand deformities	5.48915e-10
Cluster10	cellular component organization or biogenesis at cellular level	0.0462091		Cluster14	Pallor	7.78499e-09
Cluster12	axon guidance	7.97274e-19		Cluster14	Intermittent migraine headaches	1.14449e-06
Cluster12	axonogenesis	1.72286e-17		Cluster14	Cardiac conduction abnormalities	1.14449e-06
Cluster12	cell morphogenesis involved in neuron differentiation	2.88731e-17		Cluster14	EKG abnormalities	1.14449e-06
Cluster12	neuron projection morphogenesis	3.10775e-17		Cluster14	Electrocardiogram change	1.14449e-06
Cluster12	chemotaxis	5.61463e-17		Cluster14	Conduction disorder of the heart	1.22874e-06
Cluster12	taxis	5.61463e-17		Cluster14	Electrocardiogram abnormal	2.73686e-06
Cluster12	neuron projection development	7.46152e-17		Cluster14	Delayed Puberty	1.55678e-05
Cluster12	cell projection morphogenesis	9.86549e-17		Cluster14	Cardiac Arrhythmia	9.95689e-05
Cluster12	cell morphogenesis involved in differentiation	9.86549e-17		Cluster14	Erythroid hypoplasia	0.000139528
Cluster12	cell part morphogenesis	1.16945e-16		Cluster14	Uranostaphyloschisis	0.000342925
Cluster12	neuron development	5.50953e-16		Cluster14	Cleft Palate	0.00267509
Cluster12	cell morphogenesis	1.45863e-15		Cluster14	Hypoplastic myelodysplasia	0.00492984
Cluster12	cell projection organization	1.88665e-15		Cluster14	Migraine Disorders	0.00695671
Cluster12	cellular component morphogenesis	3.18972e-15		Cluster14	Fatigue	0.0232344
Cluster12	neuron differentiation	3.31129e-15		Cluster14	Aggressive Non-Hodgkin Lymphoma	0.0336641
Cluster12	locomotion	7.02693e-14		Cluster16	Patella aplasia-hypoplasia	5.25703e-05
Cluster12	generation of neurons	1.52411e-13		Cluster16	Full lower lip	5.25703e-05
Cluster12	neurogenesis	3.05245e-13		Cluster16	Prominent lower lip	5.25703e-05
Cluster12	response to external stimulus	3.30776e-13		Cluster16	Macrostomia	5.25703e-05
Cluster12	nervous system development	5.35167e-13		Cluster16	Abnormality of cardiovascular system morphology	5.31444e-05
Cluster12	cell development	8.87088e-13		Cluster16	Coffin-Siris syndrome	5.31444e-05
Cluster12	actin filament capping	1.28753e-12		Cluster16	Slow-growing hair	0.000341805
Cluster12	negative regulation of actin filament depolymerization	1.96814e-12		Cluster16	Dandy-Walker Syndrome	0.00206803
Cluster12	regulation of actin filament depolymerization	4.36203e-12		Cluster16	Generalized hirsutism	0.00206803
Cluster12	negative regulation of actin filament polymerization	8.72248e-12		Cluster16	Long eyelashes	0.00207654
Cluster12	negative regulation of protein polymerization	6.35209e-11		Cluster16	Intrauterine retardation	0.00207654
Cluster12	negative regulation of protein complex disassembly	7.7758e-11		Cluster16	Cerebellar hypoplasia and atrophy	0.00207654
Cluster12	anatomical structure morphogenesis	1.21556e-10		Cluster16	Infant, Small for Gestational Age	0.00207654
Cluster12	regulation of protein complex disassembly	3.70749e-10		Cluster16	Bushy eyebrows	0.00208882
Cluster12	negative regulation of protein complex assembly	1.11243e-09		Cluster16	Coarse facial features	0.0022943
Cluster12	negative regulation of cytoskeleton organization	3.15005e-09		Cluster16	Thickened facial skin with coarse facial features	0.0022943
Cluster12	cell differentiation	3.63611e-09		Cluster16	Short distal phalanges	0.00277839
Cluster12	system development	3.88195e-09		Cluster16	Depressed nasal ridge	0.00337904
Cluster12	regulation of actin filament polymerization	4.10416e-09		Cluster16	Broad flat nasal bridge	0.00425418
Cluster12	cellular developmental process	5.27313e-09		Cluster16	Nasal bridge wide	0.00425418
Cluster12	regulation of actin polymerization or depolymerization	6.72205e-09		Cluster16	Small head	0.0049385
Cluster12	regulation of actin filament length	7.25842e-09		Cluster16	Dental abnormalities	0.0049385
Cluster12	regulation of cellular component size	9.72052e-09		Cluster16	Fetal Growth Retardation	0.00681319
Cluster12	anatomical structure development	2.24781e-08		Cluster16	Tooth Abnormalities	0.00771867
Cluster12	regulation of protein polymerization	2.24781e-08		Cluster16	Strabismus	0.00921253
Cluster12	regulation of actin filament-based process	2.70817e-08		Cluster16	Intellectual Disability	0.00921253
Cluster12	multicellular organismal development	2.77498e-08		Cluster16	Joint hyperflexibility	0.00931001
Cluster12	response to chemical stimulus	6.28755e-08		Cluster16	Malignant Childhood Neoplasm	0.00976389
Cluster12	regulation of anatomical structure size	1.01386e-07		Cluster16	Cryptorchidism	0.00976389
Cluster12	developmental process	1.01386e-07		Cluster16	Luminal B Breast Carcinoma	0.00976389
Cluster12	cellular component organization at cellular level	2.0291e-07		Cluster16	Concave bridge of nose	0.00976389
Cluster12	multicellular organismal signaling	2.1536e-07		Cluster16	Depressed nasal bridge	0.00976389
Cluster12	cellular component organization or biogenesis at cellular level	3.27861e-07		Cluster16	Depressed nasal root/bridge	0.00976389
Cluster12	negative regulation of organelle organization	4.1089e-07		Cluster16	Adenoid Cystic Carcinoma	0.0110523
Cluster12	regulation of actin cytoskeleton organization	5.3642e-07		Cluster16	Congenital deafness	0.0127341
Cluster12	protein localization in plasma membrane	8.7944e-07		Cluster16	Muscle hypotonia	0.0135554
Cluster12	regulation of protein complex assembly	8.7944e-07		Cluster16	Hearing Loss, Partial	0.0179842
Cluster12	protein targeting to plasma membrane	1.32274e-06		Cluster16	Deafness	0.0203158
Cluster12	cellular component organization	2.08802e-06		Cluster16	Dull intelligence	0.0203158
Cluster12	establishment of protein localization in plasma membrane	2.72401e-06		Cluster16	Low intelligence	0.0203158
Cluster12	transmission of nerve impulse	2.90675e-06		Cluster16	Poor school performance	0.0203158
Cluster12	cellular component organization or biogenesis	3.12145e-06		Cluster16	Mental deficiency	0.0203158
Cluster12	multicellular organismal process	3.12243e-06		Cluster16	Recurrent respiratory infections	0.0233982
Cluster12	establishment of protein localization in membrane	3.48688e-06		Cluster16	hearing impairment	0.0240644
Cluster12	regulation of cytoskeleton organization	6.04839e-06		Cluster16	Nystagmus	0.0299446
Cluster12	plasma membrane organization	6.25629e-06		Cluster16	Sezary Syndrome	0.0338843
Cluster12	protein localization in membrane	7.29239e-06		Cluster16	Feeding difficulties in infancy	0.0470653
Cluster12	negative regulation of cellular component organization	1.33627e-05		Cluster16	Short stature	0.0490462
Cluster12	regulation of cellular component biogenesis	1.89471e-05		Cluster17	congenital cerebellar ataxia	6.18659e-05
Cluster12	regulation of action potential	4.27998e-05		Cluster17	Adult onset autosomal dominant leukodystrophy	6.18659e-05
Cluster12	neurological system process	0.000117783		Cluster17	Pertussis	6.18659e-05
Cluster12	regulation of biological quality	0.0001194		Cluster17	Glycogen Storage Disease Type VII	6.18659e-05
Cluster12	system process	0.000149458		Cluster17	Idiopathic scoliosis	6.18659e-05
Cluster12	regulation of organelle organization	0.000149613		Cluster17	MASA SYNDROME (disorder)	6.18659e-05
Cluster12	cellular membrane organization	0.000385398		Cluster17	Quebec platelet disorder	6.18659e-05
Cluster12	regulation of action potential in neuron	0.000385398		Cluster17	Multiple Epiphyseal Dysplasia	0.00015322
Cluster12	membrane organization	0.000385398		Cluster17	Arthritis, Reactive	0.00015322
Cluster12	synapse organization	0.000422249		Cluster17	Paroxysmal familial ventricular fibrillation	0.00015322
Cluster12	regulation of membrane potential	0.000523689		Cluster17	Specific language impairment	0.00015322
Cluster12	positive regulation of ion transport	0.000644809		Cluster17	Pseudoachondroplasia	0.000156137
Cluster12	signaling	0.000787744		Cluster17	Timothy syndrome	0.000156137
Cluster12	cell communication	0.00101188		Cluster17	X-linked hydrocephalus syndrome	0.000156137
Cluster12	response to stimulus	0.00140806		Cluster17	Residual Cancer	0.000185037
Cluster12	cellular protein localization	0.00213904		Cluster17	Renal dysplasia and retinal aplasia (disorder)	0.000216332
Cluster12	cellular macromolecule localization	0.00215811		Cluster17	CATARACT, MARNER TYPE	0.000250006
Cluster12	regulation of cellular component organization	0.00215811		Cluster17	African Trypanosomiasis	0.000257438
Cluster12	metal ion transport	0.00251253		Cluster17	Chronic atrial fibrillation	0.000257438
Cluster12	protein targeting to membrane	0.00378118		Cluster17	Reticuloendotheliosis, X-linked	0.000257438
Cluster12	localization	0.00378118		Cluster17	VENTRICULAR TACHYCARDIA, CATECHOLAMINERGIC POLYMORPHIC, 1 (disorder)	0.000293525
Cluster12	protein localization	0.00389538		Cluster17	Congenital long QT syndrome	0.000685256
Cluster12	Golgi vesicle transport	0.00432053		Cluster17	Drug abuse	0.00182728
Cluster12	cation transport	0.00433682		Cluster17	Angelman Syndrome	0.00182728
Cluster12	ion transmembrane transport	0.00490701		Cluster17	Delirium	0.00182728
Cluster12	monovalent inorganic cation transport	0.00505704		Cluster17	Vertigo	0.00182728
Cluster12	regulation of metal ion transport	0.00553111		Cluster17	Dizziness	0.00191507
Cluster12	macromolecule localization	0.00835241		Cluster17	Cardiomyopathy, Hypertrophic, Familial	0.00228653
Cluster12	regulation of ion transport	0.00923363		Cluster17	Acute Megakaryocytic Leukemias	0.00228653
Cluster12	cellular ion homeostasis	0.00941287		Cluster17	Brugada Syndrome (disorder)	0.00228653
Cluster12	transport	0.00941287		Cluster17	Cavernous Hemangioma of Brain	0.00228653
Cluster12	ion transport	0.0106864		Cluster17	Leishmaniasis, Cutaneous	0.00285244
Cluster12	establishment of localization	0.0107151		Cluster17	Tachycardia, Ventricular	0.00285244
Cluster12	cellular chemical homeostasis	0.0109708		Cluster17	Stress, Psychological	0.00295936
Cluster12	ion homeostasis	0.0109708		Cluster17	Hereditary pancreatitis	0.00306818
Cluster12	cellular localization	0.0112764		Cluster17	Monocytic leukemia	0.00338288
Cluster12	vesicle-mediated transport	0.0112948		Cluster17	Medulloblastoma	0.0034668
Cluster12	cellular homeostasis	0.0158587		Cluster17	Osteoarthritis of hip	0.0034668
Cluster12	chemical homeostasis	0.0277674		Cluster17	Measles	0.0034668
Cluster12	protein targeting	0.0307426		Cluster17	Diabetic Cardiomyopathies	0.0034668
Cluster12	transmembrane transport	0.0377206		Cluster17	Spastic Paraplegia	0.0034668
Cluster12	positive regulation of transport	0.0461376		Cluster17	Ventricular arrhythmia	0.0034668
Cluster13	chromosome segregation	2.88824e-13		Cluster17	Congenital cataract	0.00358509
Cluster13	mitotic chromosome condensation	2.35004e-10		Cluster17	Lymphangioleiomyomatosis	0.00391392
Cluster13	cell division	4.17797e-10		Cluster17	Epilepsy, Temporal Lobe	0.00483392
Cluster13	mitosis	4.17797e-10		Cluster17	Pituitary Diseases	0.00499074
Cluster13	nuclear division	4.17797e-10		Cluster17	Ataxia	0.00503247
Cluster13	M phase of mitotic cell cycle	4.17797e-10		Cluster17	Parathyroid Adenoma	0.00512115
Cluster13	organelle fission	4.56174e-10		Cluster17	Malignant neoplasm of gallbladder	0.00582361
Cluster13	chromosome condensation	2.85354e-09		Cluster17	Malignant Peripheral Nerve Sheath Tumor	0.00585733
Cluster13	M phase	6.42183e-09		Cluster17	Hypothyroidism	0.00589243
Cluster13	mitotic metaphase/anaphase transition	4.34373e-08		Cluster17	Long QT Syndrome	0.00594058
Cluster13	mitotic sister chromatid segregation	7.78505e-08		Cluster17	Van der Woude syndrome	0.00692092
Cluster13	organelle organization	1.01158e-07		Cluster17	Marijuana Abuse	0.00706199
Cluster13	sister chromatid segregation	1.04201e-07		Cluster17	Gallbladder Carcinoma	0.0075103
Cluster13	mitotic cell cycle	2.23768e-07		Cluster17	Enterovirus Infections	0.00827858
Cluster13	sister chromatid cohesion	3.24901e-07		Cluster17	M5b Acute differentiated monocytic leukemia	0.00876053
Cluster13	cell cycle phase	5.27446e-07		Cluster17	Addictive Behavior	0.00911794
Cluster13	cell cycle	1.96357e-06		Cluster17	Medullary carcinoma of thyroid	0.0101797
Cluster13	cell cycle process	2.60876e-06		Cluster17	Teratoma	0.0106298
Cluster13	DNA packaging	6.50955e-06		Cluster17	Ductal Carcinoma	0.0118101
Cluster13	DNA conformation change	2.36617e-05		Cluster17	Malignant neoplasm of gastrointestinal tract	0.0120824
Cluster13	cellular component organization at cellular level	2.5846e-05		Cluster17	Colon Carcinoma	0.0133596
Cluster13	cellular component organization or biogenesis at cellular level	3.91089e-05		Cluster17	Melanoma, B16	0.0140502
Cluster13	mitotic prometaphase	9.95264e-05		Cluster17	Malignant neoplasm of liver	0.0145518
Cluster13	cellular component organization	0.000194021		Cluster17	Lyme Disease	0.014852
Cluster13	chromosome organization	0.000194021		Cluster17	Liver carcinoma	0.0180635
Cluster13	cellular component organization or biogenesis	0.00027557		Cluster17	Hyperlipoproteinemia Type IIa	0.0213394
Cluster13	DNA metabolic process	0.000435043		Cluster17	Down Syndrome	0.0226858
Cluster13	M phase of meiotic cell cycle	0.00337111		Cluster17	Cervix carcinoma	0.0240522
Cluster13	meiosis	0.00337111		Cluster17	Carcinogenesis	0.0277745
Cluster13	meiotic cell cycle	0.00371914		Cluster17	Malignant tumor of cervix	0.0295493
Cluster13	DNA recombination	0.0122434		Cluster17	Anxiety Disorders	0.0299467
Cluster13	DNA repair	0.0135426		Cluster17	Liver and Intrahepatic Biliary Tract Carcinoma	0.0302893
Cluster14	translational initiation	1.3322e-90		Cluster17	Malignant lymphoma, lymphocytic, intermediate differentiation, diffuse	0.0333029
Cluster14	nuclear-transcribed mRNA catabolic process, nonsense-mediated decay	1.16308e-80		Cluster17	Cataract	0.0346055
Cluster14	nuclear-transcribed mRNA catabolic process	1.68138e-79		Cluster17	Cardiac Arrest	0.0349528
Cluster14	mRNA catabolic process	1.43922e-78		Cluster17	cervical cancer	0.0355347
Cluster14	RNA catabolic process	6.23807e-76		Cluster17	MIXED LINEAGE LEUKEMIA	0.0366856
Cluster14	translation	6.68647e-74		Cluster17	Colonic Neoplasms	0.0389654
Cluster14	translational termination	2.70873e-65		Cluster17	Primary malignant neoplasm of lung	0.0395442
Cluster14	SRP-dependent cotranslational protein targeting to membrane	5.02544e-65		Cluster17	Malignant neoplasm of kidney	0.0395442
Cluster14	cotranslational protein targeting to membrane	7.18897e-65		Cluster17	Malignant neoplasm of lung	0.0398378
Cluster14	establishment of protein localization in endoplasmic reticulum	7.18897e-65		Cluster17	Cerebellar Ataxia	0.0423794
Cluster14	protein targeting to ER	7.18897e-65		Cluster17	Tuberous Sclerosis	0.045607
Cluster14	translational elongation	1.82522e-63		Cluster18	MOSAIC VARIEGATED ANEUPLOIDY SYNDROME	0.000239889
Cluster14	viral genome expression	2.94441e-63		Cluster18	Increased nuchal translucency	0.000239889
Cluster14	viral transcription	2.94441e-63		Cluster18	Ascites	0.0127982
Cluster14	cellular protein complex disassembly	1.28646e-62		Cluster18	Dandy-Walker Syndrome	0.0127982
Cluster14	protein localization in endoplasmic reticulum	1.39204e-62		Cluster18	Abnormality of vision	0.0139851
Cluster14	protein complex disassembly	2.28474e-62		Cluster18	Muscle biopsy shows dystrophic changes	0.0139851
Cluster14	cellular macromolecular complex disassembly	3.84233e-58		Cluster18	Ovarian Serous Adenocarcinoma	0.0139851
Cluster14	macromolecular complex disassembly	6.23998e-58		Cluster18	Small head	0.0139851
Cluster14	protein targeting to membrane	2.08388e-57		Cluster18	Hypoplastic mandible condyle	0.0139851
Cluster14	viral infectious cycle	9.84725e-52		Cluster18	Mandibular hypoplasia	0.0139851
Cluster14	establishment of protein localization to organelle	6.22766e-51		Cluster18	Micrognathism	0.0139851
Cluster14	viral reproductive process	1.41195e-47		Cluster18	Clouding of corneal stroma	0.0160432
Cluster14	mRNA metabolic process	1.73631e-47		Cluster18	Myotonic Dystrophy	0.018238
Cluster14	cellular macromolecule catabolic process	3.09716e-47		Cluster18	Corneal Opacity	0.018238
Cluster14	cellular component disassembly at cellular level	3.21643e-46		Cluster18	Triangular face	0.018238
Cluster14	cellular component disassembly	3.98675e-46		Cluster18	Cerebellar Hypoplasia	0.0261571
Cluster14	macromolecule catabolic process	9.39747e-45		Cluster18	Primary Effusion Lymphoma	0.0372525
Cluster14	protein targeting	1.07501e-39		Cluster18	Malignant neoplasm of stomach	0.0383038
Cluster14	protein localization to organelle	1.55004e-38		Cluster18	Secondary malignant neoplasm of lymph node	0.0385185
Cluster14	cellular process involved in reproduction	2.0481e-37		Cluster18	Polyhydramnios	0.0385185
Cluster14	gene expression	3.99469e-36		Cluster18	Abnormally small eyeball	0.0385185
Cluster14	cellular macromolecule biosynthetic process	5.49989e-35		Cluster18	Decreased size of eyeball	0.0385185
Cluster14	macromolecule biosynthetic process	9.07013e-35		Cluster18	Stomach Carcinoma	0.0385185
Cluster14	viral reproduction	1.69253e-33		Cluster18	Congenital Epicanthus	0.0444884
Cluster14	cellular macromolecular complex subunit organization	3.78697e-33		Cluster19	Pityriasis Rosea	1.69288e-05
Cluster14	cellular catabolic process	5.06577e-33		Cluster19	Alveolar echinococcosis	0.000417304
Cluster14	intracellular protein transport	4.89255e-32		Cluster19	Arthrofibrosis	0.00114818
Cluster14	catabolic process	2.57825e-30		Cluster19	Seropositive rheumatoid arthritis	0.00114818
Cluster14	protein complex subunit organization	3.0752e-30		Cluster19	Oligoarticular Arthritis	0.00114818
Cluster14	cellular biosynthetic process	5.08633e-30		Cluster19	Tumor Virus Infections	0.00114818
Cluster14	biosynthetic process	2.34183e-29		Cluster19	Hemoglobinuria, Paroxysmal	0.00191633
Cluster14	cellular protein metabolic process	2.34183e-29		Cluster19	Drug toxicity	0.00192043
Cluster14	intracellular transport	2.71917e-29		Cluster19	PEELING SKIN SYNDROME	0.00192043
Cluster14	macromolecular complex subunit organization	1.91012e-26		Cluster19	Rheumatic Heart Disease	0.00192043
Cluster14	protein metabolic process	1.26461e-25		Cluster19	Bare Lymphocyte Syndrome	0.00192043
Cluster14	cellular protein localization	1.73416e-25		Cluster19	Chromosome 11p11.2 Deletion Syndrome	0.00192043
Cluster14	cellular macromolecule localization	2.09822e-25		Cluster19	Hemochromatosis	0.00192043
Cluster14	RNA metabolic process	2.68186e-24		Cluster19	Substance Abuse, Intravenous	0.00208624
Cluster14	macromolecule localization	2.49664e-23		Cluster19	Abruptio Placentae	0.00242334
Cluster14	establishment of localization in cell	2.76196e-23		Cluster19	Recurrent respiratory papillomatosis	0.00278397
Cluster14	cellular macromolecule metabolic process	7.8768e-23		Cluster19	Addison's disease due to autoimmunity	0.00316782
Cluster14	protein transport	2.39139e-22		Cluster19	Schwartz-Jampel Syndrome	0.00357455
Cluster14	establishment of protein localization	5.53215e-22		Cluster19	HEMOCHROMATOSIS, TYPE 1	0.00362253
Cluster14	nucleic acid metabolic process	7.82213e-22		Cluster19	Tonsillar Squamous Cell Carcinoma	0.00362253
Cluster14	reproductive process	5.15898e-21		Cluster19	Typhoid Fever	0.00362253
Cluster14	reproduction	5.97457e-21		Cluster19	Bare lymphocyte syndrome 2	0.00405037
Cluster14	macromolecule metabolic process	1.50187e-20		Cluster19	Spondylarthropathies	0.00463961
Cluster14	cellular localization	4.63473e-20		Cluster19	Equine Infectious Anemia	0.00497201
Cluster14	nucleobase-containing compound metabolic process	1.41075e-18		Cluster19	Abortion, Habitual	0.005255
Cluster14	primary metabolic process	3.66938e-18		Cluster19	Combined immunodeficiency	0.005255
Cluster14	protein localization	1.24649e-17		Cluster19	Toxic Epidermal Necrolysis	0.00733256
Cluster14	cellular nitrogen compound metabolic process	1.89381e-17		Cluster19	Leptospirosis	0.00791993
Cluster14	nitrogen compound metabolic process	2.97663e-17		Cluster19	Hypersensitivity	0.00886717
Cluster14	regulation of translation	5.62464e-17		Cluster19	Autoimmune Primary Adrenal Insufficiency	0.010127
Cluster14	metabolic process	4.78345e-16		Cluster19	Cholangitis, Sclerosing	0.0104656
Cluster14	cellular metabolic process	6.31558e-16		Cluster19	Herpesviridae Infections	0.0104656
Cluster14	RNA biosynthetic process	2.20592e-14		Cluster19	Chronic ulcerative colitis	0.0112228
Cluster14	regulation of translational initiation	3.2236e-14		Cluster19	Chagas Cardiomyopathy	0.0118522
Cluster14	transport	1.76609e-13		Cluster19	Hemophilia A	0.0119804
Cluster14	establishment of localization	4.43691e-13		Cluster19	Congenital adrenal hyperplasia	0.0119804
Cluster14	posttranscriptional regulation of gene expression	7.93135e-12		Cluster19	Coronary Aneurysm	0.0119804
Cluster14	ribosomal small subunit biogenesis	9.69726e-12		Cluster19	Hemophilia B	0.0119804
Cluster14	ribosome biogenesis	6.64955e-10		Cluster19	Optic Neuritis	0.0119804
Cluster14	rRNA processing	3.47879e-09		Cluster19	Spinal Cord Diseases	0.0119804
Cluster14	ribonucleoprotein complex biogenesis	4.95167e-09		Cluster19	Classical Hodgkin's Lymphoma	0.012087
Cluster14	localization	5.33883e-09		Cluster19	HTLV-I Infections	0.0121049
Cluster14	nuclear-transcribed mRNA poly(A) tail shortening	5.33883e-09		Cluster19	Infectious Mononucleosis	0.0121049
Cluster14	rRNA metabolic process	5.77293e-09		Cluster19	Neuromyelitis Optica	0.0128177
Cluster14	cellular component biogenesis at cellular level	1.0075e-08		Cluster19	Henoch-Schoenlein Purpura	0.014619
Cluster14	cellular component organization at cellular level	7.80424e-08		Cluster19	Hepatitis, Autoimmune	0.0146218
Cluster14	cellular component organization or biogenesis at cellular level	7.80424e-08		Cluster19	Rhinitis	0.0146218
Cluster14	ncRNA processing	2.14178e-07		Cluster19	Tropical Spastic Paraparesis	0.0147466
Cluster14	cellular component organization or biogenesis	8.0304e-07		Cluster19	Immunoglobulin A deficiency (disorder)	0.0155185
Cluster14	cellular component organization	8.18063e-07		Cluster19	Alopecia Areata	0.016307
Cluster14	nuclear-transcribed mRNA catabolic process, deadenylation-dependent decay	1.91214e-06		Cluster19	Pemphigus	0.0167827
Cluster14	RNA processing	4.10393e-06		Cluster19	Stevens-Johnson Syndrome	0.0167827
Cluster14	ncRNA metabolic process	6.32588e-06		Cluster19	Pregnancy loss	0.0175942
Cluster14	mRNA 3'-end processing	2.00394e-05		Cluster19	Oral Submucous Fibrosis	0.0184217
Cluster14	mRNA transport	2.79923e-05		Cluster19	Arthropathy	0.0195048
Cluster14	RNA 3'-end processing	2.98974e-05		Cluster19	Autoimmune thyroiditis	0.01966
Cluster14	RNA transport	7.70981e-05		Cluster19	Inclusion Body Myopathy, Sporadic	0.01966
Cluster14	establishment of RNA localization	7.70981e-05		Cluster19	Icterus	0.01966
Cluster14	nucleic acid transport	7.70981e-05		Cluster19	Idiopathic Inflammatory Myopathies	0.01966
Cluster14	mRNA export from nucleus	7.86526e-05		Cluster19	Papillomavirus Infections	0.01966
Cluster14	deoxyribonucleotide biosynthetic process	8.34913e-05		Cluster19	Primary sclerosing cholangitis	0.01966
Cluster14	maturation of SSU-rRNA	8.34913e-05		Cluster19	Myositis	0.0247313
Cluster14	RNA localization	0.000110694		Cluster19	Rheumatic Fever	0.0251779
Cluster14	nucleobase-containing compound transport	0.000116902		Cluster19	Common Variable Immunodeficiency	0.0256138
Cluster14	negative regulation of translation	0.0001462		Cluster19	Gestational Diabetes	0.0257269
Cluster14	RNA export from nucleus	0.000153464		Cluster19	Rotting teeth	0.0266829
Cluster14	ribosomal large subunit biogenesis	0.000325156		Cluster19	Bullous pemphigoid	0.0272457
Cluster14	nuclear export	0.000719705		Cluster19	Pemphigus Vulgaris	0.0272457
Cluster14	regulation of cellular protein metabolic process	0.00080666		Cluster19	Iron Overload	0.0278169
Cluster14	nucleobase-containing small molecule interconversion	0.00080666		Cluster19	Trachoma	0.0278169
Cluster14	deoxyribonucleotide metabolic process	0.00196678		Cluster19	Primary biliary cirrhosis	0.0279143
Cluster14	regulation of protein metabolic process	0.00430966		Cluster19	Diabetes, Autoimmune	0.0285965
Cluster14	nucleocytoplasmic transport	0.00772346		Cluster19	Occupational Diseases	0.0285965
Cluster14	nuclear transport	0.00845602		Cluster19	Persistent infection	0.0285965
Cluster14	cytokine-mediated signaling pathway	0.0165909		Cluster19	Spondylarthritis	0.0285965
Cluster14	positive regulation of translation	0.0187316		Cluster19	Complete atrioventricular block	0.0304124
Cluster14	cellular component biogenesis	0.0281511		Cluster19	Uveomeningoencephalitic Syndrome	0.0305703
Cluster14	erythrocyte homeostasis	0.0324677		Cluster19	Addison Disease	0.0311762
Cluster14	ribonucleoprotein complex assembly	0.0359426		Cluster19	Adult type dermatomyositis	0.0311762
Cluster14	ribonucleoprotein complex subunit organization	0.0401863		Cluster19	Bronchiectasis	0.0321862
Cluster14	cellular response to cytokine stimulus	0.0489928		Cluster19	Viremia	0.0332082
Cluster16	chromosome organization	4.67717e-21		Cluster19	Autoimmune thyroid disease	0.0340106
Cluster16	chromatin organization	8.03591e-21		Cluster19	Mucocutaneous Lymph Node Syndrome	0.0340106
Cluster16	chromatin remodeling	1.2517e-20		Cluster19	Nasopharyngeal Neoplasms	0.0344572
Cluster16	chromatin disassembly	1.2517e-20		Cluster19	Osteoporosis, Postmenopausal	0.0344572
Cluster16	nucleosome disassembly	1.2517e-20		Cluster19	Hay fever	0.0395812
Cluster16	protein-DNA complex disassembly	1.2517e-20		Cluster19	Multiple Sclerosis, Relapsing-Remitting	0.0395812
Cluster16	chromatin modification	3.24029e-19		Cluster19	Cytomegalovirus Infections	0.0413011
Cluster16	nucleosome organization	1.43875e-15		Cluster19	Scleroderma	0.0413011
Cluster16	chromatin assembly or disassembly	3.45992e-15		Cluster19	Enterovirus Infections	0.047881
Cluster16	protein-DNA complex subunit organization	9.01149e-15		Cluster19	Polymyositis	0.0490624
Cluster16	regulation of transcription, DNA-dependent	5.57747e-13		Cluster19	Celiac Disease	0.0495191
Cluster16	regulation of RNA biosynthetic process	6.29156e-13		Cluster2	Spastic paraplegia 10, autosomal dominant	3.38432e-07
Cluster16	regulation of RNA metabolic process	1.05464e-12		Cluster2	Spastic Paraplegia, Hereditary	1.86524e-06
Cluster16	cellular macromolecule biosynthetic process	4.30822e-12		Cluster2	Henoch-Schoenlein Purpura	6.08769e-05
Cluster16	macromolecule biosynthetic process	4.84985e-12		Cluster2	Stalking (behavior)	0.00396894
Cluster16	regulation of cellular macromolecule biosynthetic process	5.45649e-12		Cluster21	Distal sensory impairment	0.00308088
Cluster16	organelle organization	6.86375e-12		Cluster21	Progressive disorder	0.00308088
Cluster16	regulation of macromolecule biosynthetic process	9.31259e-12		Cluster21	Autosomal recessive predisposition	0.00935202
Cluster16	regulation of gene expression	3.0914e-11		Cluster21	Hypoplasia of corpus callosum	0.00935202
Cluster16	regulation of cellular biosynthetic process	3.09685e-11		Cluster21	Rhabdomyosarcoma, Embryonal	0.0123224
Cluster16	regulation of nucleobase-containing compound metabolic process	3.64242e-11		Cluster21	Tauopathies	0.0146514
Cluster16	regulation of biosynthetic process	3.71248e-11		Cluster21	Arthropathy	0.0146514
Cluster16	cellular macromolecular complex disassembly	4.05407e-11		Cluster21	Charcot-Marie-Tooth Disease	0.0146514
Cluster16	macromolecular complex disassembly	4.30532e-11		Cluster21	Cognitive delay	0.0178304
Cluster16	transcription, DNA-dependent	4.69572e-11		Cluster21	Mental and motor retardation	0.0178304
Cluster16	regulation of nitrogen compound metabolic process	6.55132e-11		Cluster21	Hyperreflexia	0.0307704
Cluster16	cellular biosynthetic process	1.37728e-10		Cluster21	Global developmental delay	0.0329153
Cluster16	RNA biosynthetic process	1.50791e-10		Cluster21	Steatohepatitis	0.0404759
Cluster16	biosynthetic process	2.23496e-10		Cluster21	Vaccinia	0.0404759
Cluster16	nucleic acid metabolic process	5.18631e-10		Cluster21	Promyelocytic leukemia	0.0451016
Cluster16	cellular component disassembly at cellular level	8.70335e-10		Cluster23	Non-alcoholic Fatty Liver Disease	0.0089927
Cluster16	cellular component disassembly	8.92925e-10		Cluster25	Neoplasm Metastasis	2.58278e-20
Cluster16	nucleobase-containing compound metabolic process	1.01764e-08		Cluster25	Tumor Progression	2.58278e-20
Cluster16	regulation of macromolecule metabolic process	1.70725e-08		Cluster25	Glioma	1.66758e-18
Cluster16	cellular nitrogen compound metabolic process	2.82136e-08		Cluster25	Astrocytoma	4.2992e-18
Cluster16	regulation of primary metabolic process	3.23112e-08		Cluster25	Mammary Neoplasms	4.2992e-18
Cluster16	nitrogen compound metabolic process	3.23112e-08		Cluster25	Ewings sarcoma	4.2992e-18
Cluster16	RNA metabolic process	4.15014e-08		Cluster25	Glioblastoma	1.18658e-17
Cluster16	regulation of cellular metabolic process	4.45258e-08		Cluster25	Juvenile Myelomonocytic Leukemia	2.08762e-17
Cluster16	cellular component organization at cellular level	8.13148e-08		Cluster25	Hyperactive behavior	2.43715e-17
Cluster16	cellular macromolecular complex subunit organization	1.42083e-07		Cluster25	Carcinoma of lung	2.83873e-17
Cluster16	cellular component organization or biogenesis at cellular level	1.6629e-07		Cluster25	Primary malignant neoplasm of lung	4.49687e-17
Cluster16	regulation of metabolic process	4.42395e-07		Cluster25	Malignant neoplasm of lung	7.00382e-17
Cluster16	gene expression	4.46599e-07		Cluster25	Adenocarcinoma of lung (disorder)	1.09147e-16
Cluster16	regulation of transcription from RNA polymerase II promoter	1.29272e-06		Cluster25	Breast Carcinoma	1.29116e-16
Cluster16	cellular component organization	2.60801e-06		Cluster25	Prostatic Neoplasms	1.87639e-16
Cluster16	chromatin-mediated maintenance of transcription	2.77293e-06		Cluster25	Myeloid Leukemia, Chronic	1.10641e-15
Cluster16	cellular component organization or biogenesis	4.78367e-06		Cluster25	Malignant neoplasm of breast	1.31209e-15
Cluster16	positive regulation of gene expression, epigenetic	3.12431e-05		Cluster25	Metastatic malignant neoplasm to brain	2.60566e-15
Cluster16	cellular macromolecule metabolic process	3.12431e-05		Cluster25	Tumor Initiation	5.10789e-15
Cluster16	macromolecular complex subunit organization	3.85246e-05		Cluster25	Neuroblastoma	6.31885e-15
Cluster16	regulation of cellular process	4.46148e-05		Cluster25	Stomach Carcinoma	7.63203e-15
Cluster16	nervous system development	4.64562e-05		Cluster25	Colorectal Carcinoma	7.78902e-15
Cluster16	macromolecule metabolic process	0.00013308		Cluster25	Triple Negative Breast Neoplasms	1.68347e-14
Cluster16	DNA replication	0.000154591		Cluster25	melanoma	1.68347e-14
Cluster16	regulation of biological process	0.000182151		Cluster25	Central neuroblastoma	1.68347e-14
Cluster16	positive regulation of transcription, DNA-dependent	0.000279662		Cluster25	Leukemia, Myelocytic, Acute	2.25436e-14
Cluster16	anatomical structure development	0.000338702		Cluster25	Liver carcinoma	2.60109e-14
Cluster16	multicellular organismal development	0.000436101		Cluster25	Colorectal Cancer	2.66417e-14
Cluster16	positive regulation of RNA metabolic process	0.000441298		Cluster25	LEOPARD Syndrome	2.90352e-14
Cluster16	biological regulation	0.000569744		Cluster25	Malignant neoplasm of stomach	3.24155e-14
Cluster16	positive regulation of gene expression	0.000569744		Cluster25	Non-Small Cell Lung Carcinoma	3.24155e-14
Cluster16	DNA metabolic process	0.000831924		Cluster25	Tumor Angiogenesis	3.46219e-14
Cluster16	system development	0.000852347		Cluster25	Ovarian Carcinoma	7.01418e-14
Cluster16	positive regulation of macromolecule biosynthetic process	0.000857251		Cluster25	Prostate carcinoma	7.57927e-14
Cluster16	positive regulation of nucleobase-containing compound metabolic process	0.00119112		Cluster25	Gastrointestinal Stromal Tumors	7.57927e-14
Cluster16	sister chromatid segregation	0.00126931		Cluster25	Carcinoma breast stage IV	8.84308e-14
Cluster16	developmental process	0.00135855		Cluster25	Pancreatic Neoplasm	2.28156e-13
Cluster16	positive regulation of nitrogen compound metabolic process	0.00135855		Cluster25	Neurilemmoma	3.23109e-13
Cluster16	cellular metabolic process	0.0020008		Cluster25	Adenocarcinoma	4.95349e-13
Cluster16	positive regulation of cellular biosynthetic process	0.0020008		Cluster25	Squamous cell carcinoma	4.95349e-13
Cluster16	positive regulation of biosynthetic process	0.00225336		Cluster25	Multiple Myeloma	5.34346e-13
Cluster16	primary metabolic process	0.00233164		Cluster25	Rhabdomyosarcoma	7.78493e-13
Cluster16	DNA conformation change	0.00329412		Cluster25	Malignant neoplasm of prostate	8.72772e-13
Cluster16	intracellular steroid hormone receptor signaling pathway	0.00610138		Cluster25	Thyroid Neoplasm	9.08497e-13
Cluster16	DNA-dependent DNA replication	0.00686322		Cluster25	Malignant tumor of colon	1.05199e-12
Cluster16	retina development in camera-type eye	0.00736615		Cluster25	Colon Carcinoma	1.06987e-12
Cluster16	metabolic process	0.00748194		Cluster25	Pilocytic Astrocytoma	1.19344e-12
Cluster16	regulation of gene expression, epigenetic	0.0105277		Cluster25	Colonic Neoplasms	1.31842e-12
Cluster16	DNA packaging	0.0136166		Cluster25	Colorectal cancer metastatic	1.41977e-12
Cluster16	negative regulation of cell growth	0.0152369		Cluster25	Malignant neoplasm of ovary	1.53847e-12
Cluster16	muscle cell differentiation	0.0160845		Cluster25	Malignant neoplasm of pancreas	1.95071e-12
Cluster16	negative regulation of transcription, DNA-dependent	0.0163329		Cluster25	solid tumor	1.99641e-12
Cluster16	negative regulation of RNA metabolic process	0.0188314		Cluster25	Colorectal Neoplasms	2.1445e-12
Cluster16	chromosome segregation	0.0188314		Cluster25	Chronic Lymphocytic Leukemia	3.08305e-12
Cluster16	multicellular organismal process	0.026311		Cluster25	Persistent embryonic structure	3.45421e-12
Cluster16	negative regulation of gene expression	0.0271998		Cluster25	Pancreatic carcinoma	6.77218e-12
Cluster16	regulation of interphase of mitotic cell cycle	0.0285088		Cluster25	Nasopharyngeal carcinoma	9.86886e-12
Cluster16	mitotic cell cycle checkpoint	0.0293208		Cluster25	Mammary Tumorigenesis	9.86886e-12
Cluster16	negative regulation of cellular macromolecule biosynthetic process	0.0293208		Cluster25	Small cell carcinoma of lung	9.89366e-12
Cluster16	in utero embryonic development	0.030875		Cluster25	Invasive carcinoma of breast	1.21154e-11
Cluster16	negative regulation of nucleobase-containing compound metabolic process	0.030875		Cluster25	Epithelial ovarian cancer	1.56514e-11
Cluster16	negative regulation of nitrogen compound metabolic process	0.0315443		Cluster25	Liver neoplasms	1.58187e-11
Cluster16	negative regulation of macromolecule biosynthetic process	0.0335237		Cluster25	Precancerous Conditions	1.72108e-11
Cluster16	heart morphogenesis	0.0341776		Cluster25	Anaplastic thyroid carcinoma	1.98033e-11
Cluster16	regulation of growth	0.0341776		Cluster25	ovarian neoplasm	1.99205e-11
Cluster16	negative regulation of growth	0.0341776		Cluster25	Diabetic Nephropathy	2.1856e-11
Cluster16	positive regulation of macromolecule metabolic process	0.0376866		Cluster25	Neurofibromatosis 1	2.37447e-11
Cluster16	camera-type eye development	0.0376866		Cluster25	Lung Neoplasms	2.51845e-11
Cluster16	DNA recombination	0.0380295		Cluster25	Medulloblastoma	2.51845e-11
Cluster16	intracellular receptor mediated signaling pathway	0.0391012		Cluster25	Lymphoma	3.23599e-11
Cluster16	negative regulation of cellular biosynthetic process	0.0391209		Cluster25	Fibrosarcoma	3.30878e-11
Cluster16	positive regulation of cellular metabolic process	0.0403432		Cluster25	Squamous cell carcinoma of the head and neck	3.73511e-11
Cluster16	negative regulation of biosynthetic process	0.0415681		Cluster25	Carcinogenesis	4.01142e-11
Cluster16	negative regulation of cell proliferation	0.0435267		Cluster25	Rhabdomyosarcoma, Embryonal	4.07927e-11
Cluster16	heart development	0.0485892		Cluster25	B-Cell Lymphomas	4.51925e-11
Cluster17	vesicle localization	0.000207605		Cluster25	Retinoblastoma	4.97221e-11
Cluster17	cytokinesis	0.000209418		Cluster25	Brain Neoplasms	5.38912e-11
Cluster17	vesicle transport along microtubule	0.000209418		Cluster25	Metastatic melanoma	6.85418e-11
Cluster17	microtubule-based transport	0.000315303		Cluster25	leukemia	7.53066e-11
Cluster17	cytoskeleton-dependent intracellular transport	0.000349764		Cluster25	Costello syndrome (disorder)	7.92759e-11
Cluster17	microtubule-based movement	0.00038159		Cluster25	synovial sarcoma	8.13432e-11
Cluster17	microtubule-based process	0.000441352		Cluster25	Secondary malignant neoplasm of lymph node	8.69706e-11
Cluster17	organelle transport along microtubule	0.00103935		Cluster25	Thymoma	1.11115e-10
Cluster17	organelle localization	0.00114583		Cluster25	Precursor T-Cell Lymphoblastic Leukemia-Lymphoma	1.30803e-10
Cluster17	protein ubiquitination	0.00114583		Cluster25	Hemangiosarcoma	1.39927e-10
Cluster17	protein modification by small protein conjugation	0.00145843		Cluster25	Refractory cancer	1.41317e-10
Cluster17	cell division	0.00145843		Cluster25	Noonan Syndrome	1.60425e-10
Cluster17	M phase	0.00159923		Cluster25	Malignant Pleural Mesothelioma	1.64594e-10
Cluster17	mitosis	0.00168277		Cluster25	Secondary malignant neoplasm of liver	2.0262e-10
Cluster17	nuclear division	0.00168277		Cluster25	Chronic myeloproliferative disorder	2.18626e-10
Cluster17	M phase of mitotic cell cycle	0.00168277		Cluster25	Hematopoietic Neoplasms	2.2175e-10
Cluster17	proteasomal ubiquitin-dependent protein catabolic process	0.00168277		Cluster25	Anaplastic astrocytoma	2.2175e-10
Cluster17	proteasomal protein catabolic process	0.00168277		Cluster25	Lymphatic Abnormalities	2.24308e-10
Cluster17	regulation of smoothened signaling pathway	0.00168277		Cluster25	Thyroid carcinoma	3.13762e-10
Cluster17	organelle fission	0.00169753		Cluster25	Osteosarcoma	3.34165e-10
Cluster17	protein modification by small protein conjugation or removal	0.00207389		Cluster25	Burkitt Lymphoma	3.81563e-10
Cluster17	organelle organization	0.00483909		Cluster25	Chordoma	3.81563e-10
Cluster17	cilium morphogenesis	0.00651502		Cluster25	Neuroendocrine Tumors	3.89329e-10
Cluster17	cellular component organization at cellular level	0.00760805		Cluster25	Metastasis from malignant tumor of prostate	3.94746e-10
Cluster17	mitotic cell cycle	0.0100427		Cluster25	Paroxysmal kinesigenic choreoathetosis	4.53187e-10
Cluster17	cellular component organization or biogenesis at cellular level	0.0100427		Cluster25	Sarcoma	4.72275e-10
Cluster17	ubiquitin-dependent protein catabolic process	0.0100427		Cluster25	Squamous cell carcinoma of esophagus	5.55368e-10
Cluster17	spindle organization	0.0100427		Cluster25	Neurofibromatoses	6.80447e-10
Cluster17	modification-dependent protein catabolic process	0.0100427		Cluster25	Myeloproliferative disease	8.36328e-10
Cluster17	modification-dependent macromolecule catabolic process	0.0102113		Cluster25	Pheochromocytoma	9.05424e-10
Cluster17	Wnt receptor signaling pathway	0.0102113		Cluster25	Transitional cell carcinoma of bladder	9.39863e-10
Cluster17	proteolysis involved in cellular protein catabolic process	0.0104395		Cluster25	Secondary malignant neoplasm of bone	1.20974e-09
Cluster17	cell morphogenesis	0.0104395		Cluster25	Turner Syndrome, Male	1.26713e-09
Cluster17	cellular component organization	0.0104395		Cluster25	Papillary thyroid carcinoma	1.30107e-09
Cluster17	cellular protein metabolic process	0.0105364		Cluster25	Acute Promyelocytic Leukemia	1.37192e-09
Cluster17	cellular protein catabolic process	0.0106665		Cluster25	Metastatic Prostate Carcinoma	1.37192e-09
Cluster17	cellular protein modification process	0.0111158		Cluster25	Ependymoma	1.39672e-09
Cluster17	protein modification process	0.0111158		Cluster25	Secondary malignant neoplasm of lung	1.52839e-09
Cluster17	cell cycle phase	0.011984		Cluster25	Neoplasm Invasiveness	1.56266e-09
Cluster17	cellular component morphogenesis	0.0124229		Cluster25	Malignant neoplasm of thyroid	1.59328e-09
Cluster17	cellular component organization or biogenesis	0.012565		Cluster25	Esophageal carcinoma	1.66938e-09
Cluster17	morphogenesis of embryonic epithelium	0.0133526		Cluster25	Hereditary gingival fibromatosis	1.94559e-09
Cluster17	macromolecule modification	0.0136793		Cluster25	Exanthema	1.9848e-09
Cluster17	protein catabolic process	0.0141701		Cluster25	Malignant neoplasm of esophagus	2.21467e-09
Cluster17	neural tube development	0.015233		Cluster25	Inflammatory Breast Carcinoma	2.28211e-09
Cluster17	anatomical structure formation involved in morphogenesis	0.0193307		Cluster25	Adenocarcinoma of pancreas	2.36495e-09
Cluster17	cell cycle	0.0256413		Cluster25	Pituitary Neoplasms	2.37014e-09
Cluster17	chordate embryonic development	0.0256413		Cluster25	Stomach Neoplasms	2.42819e-09
Cluster17	cell cycle process	0.0256413		Cluster25	Bladder Neoplasm	2.45853e-09
Cluster17	protein metabolic process	0.0256413		Cluster25	Glioblastoma Multiforme	2.46111e-09
Cluster17	embryo development ending in birth or egg hatching	0.0256413		Cluster25	Lip and Oral Cavity Carcinoma	2.65382e-09
Cluster17	macromolecule catabolic process	0.0311503		Cluster25	Pseudomyxoma Peritonei	2.86049e-09
Cluster17	blood coagulation	0.0342755		Cluster25	ESTROGEN RESISTANCE	2.91749e-09
Cluster17	coagulation	0.0342755		Cluster25	Hyperinsulinism	3.1077e-09
Cluster17	cell projection organization	0.0342755		Cluster25	Human Papillomavirus Positive Oropharyngeal Squamous Cell Carcinoma	3.38356e-09
Cluster17	hemostasis	0.0342789		Cluster25	Malignant neoplasm of mouth	3.51481e-09
Cluster17	kidney development	0.0356386		Cluster25	leiomyosarcoma	3.69343e-09
Cluster17	intracellular transport	0.0364819		Cluster25	Mesothelioma	4.24956e-09
Cluster17	renal system development	0.0373929		Cluster25	Primary Glioblastoma	4.74708e-09
Cluster17	cellular localization	0.0409498		Cluster25	Spots on skin	5.17495e-09
Cluster17	establishment of localization in cell	0.0489373		Cluster25	Hepatocarcinogenesis	5.48633e-09
Cluster17	epithelial tube morphogenesis	0.0491169		Cluster25	Differentiated Thyroid Gland Carcinoma	5.56298e-09
Cluster17	cellular component movement	0.0491882		Cluster25	Nerve Sheath Tumors	5.82554e-09
Cluster17	cell projection morphogenesis	0.0491882		Cluster25	Osteosarcoma of bone	5.90143e-09
Cluster17	negative regulation of gene expression	0.0495509		Cluster25	Carcinoma of bladder	6.54882e-09
Cluster18	mitotic prometaphase	8.19208e-76		Cluster25	Esophageal Neoplasms	7.07648e-09
Cluster18	mitosis	9.59404e-53		Cluster25	Malignant Glioma	7.10089e-09
Cluster18	nuclear division	9.59404e-53		Cluster25	Medullary carcinoma of thyroid	7.10089e-09
Cluster18	M phase of mitotic cell cycle	1.44774e-52		Cluster25	Monosomy	7.32582e-09
Cluster18	organelle fission	3.22974e-52		Cluster25	Invasive Carcinoma	8.16299e-09
Cluster18	M phase	5.31601e-47		Cluster25	Malignant neoplasm of brain	8.19206e-09
Cluster18	mitotic cell cycle	8.19728e-40		Cluster25	Malignant neoplasm of urinary bladder	1.14786e-08
Cluster18	cell cycle phase	4.55575e-38		Cluster25	Arteriosclerosis	1.22954e-08
Cluster18	cell cycle process	5.294e-37		Cluster25	Kidney Neoplasm	1.22954e-08
Cluster18	cell cycle	5.9971e-33		Cluster25	Renal Cell Carcinoma	1.2835e-08
Cluster18	organelle organization	1.92416e-29		Cluster25	Orbital separation excessive	1.28555e-08
Cluster18	chromosome segregation	2.23951e-29		Cluster25	Adenocarcinoma Of Esophagus	1.40328e-08
Cluster18	cell division	4.9899e-25		Cluster25	Squamous cell carcinoma of skin	1.4929e-08
Cluster18	cellular component organization at cellular level	4.2855e-21		Cluster25	Ductal Carcinoma	1.50843e-08
Cluster18	cellular component organization or biogenesis at cellular level	1.7844e-20		Cluster25	MYELODYSPLASTIC SYNDROME	1.55537e-08
Cluster18	CenH3-containing nucleosome assembly at centromere	2.21047e-19		Cluster25	Paget Disease Extramammary	1.60752e-08
Cluster18	DNA replication-independent nucleosome assembly	2.21047e-19		Cluster25	Malignant neoplasm of endometrium	1.73891e-08
Cluster18	DNA replication-independent nucleosome organization	2.21047e-19		Cluster25	Papilloma	1.77872e-08
Cluster18	chromatin remodeling at centromere	4.3798e-19		Cluster25	Uterine Corpus Cancer	1.81262e-08
Cluster18	histone exchange	8.28779e-19		Cluster25	B-cell adult acute lymphoblastic leukemia	1.84094e-08
Cluster18	cellular component organization	3.60685e-18		Cluster25	stage, pancreatic cancer	1.84094e-08
Cluster18	ATP-dependent chromatin remodeling	4.70289e-18		Cluster25	Malignant mesothelioma	1.89818e-08
Cluster18	cellular component organization or biogenesis	1.2205e-17		Cluster25	Malignant Peripheral Nerve Sheath Tumor	1.92236e-08
Cluster18	protein-DNA complex assembly	2.94112e-17		Cluster25	Atherosclerosis	1.99228e-08
Cluster18	protein-DNA complex subunit organization	3.18823e-16		Cluster25	Kaposi Sarcoma	1.99945e-08
Cluster18	microtubule cytoskeleton organization	1.89364e-14		Cluster25	Neoplastic Cell Transformation	2.05672e-08
Cluster18	microtubule-based process	1.64195e-13		Cluster25	Diabetes Mellitus, Non-Insulin-Dependent	2.05672e-08
Cluster18	nucleosome assembly	1.64972e-13		Cluster25	Leukemia, Myelomonocytic, Chronic	2.19614e-08
Cluster18	chromosome organization	1.82683e-13		Cluster25	Morphologically altered structure	2.24309e-08
Cluster18	chromatin assembly	5.88198e-13		Cluster25	DYSFUNCTION - SKIN DISORDERS	2.45713e-08
Cluster18	nucleosome organization	2.56206e-12		Cluster25	Carcinoma, Transitional Cell	2.47069e-08
Cluster18	chromatin assembly or disassembly	5.88672e-12		Cluster25	Addictive Behavior	2.61336e-08
Cluster18	chromatin remodeling	5.88672e-12		Cluster25	Recurrent tumor	2.82287e-08
Cluster18	DNA packaging	1.48397e-11		Cluster25	Hematologic Neoplasms	3.13015e-08
Cluster18	cellular macromolecular complex subunit organization	1.81005e-11		Cluster25	Rhabdoid Tumor of the Kidney	3.19501e-08
Cluster18	spindle checkpoint	1.06429e-10		Cluster25	HER2 gene amplification	3.30764e-08
Cluster18	DNA conformation change	2.70369e-10		Cluster25	Hypertrophic disorder of skin, unspecified	3.30764e-08
Cluster18	kinetochore organization	2.70369e-10		Cluster25	Endometriosis	3.49116e-08
Cluster18	cellular macromolecular complex assembly	2.70369e-10		Cluster25	Ki-1+ Anaplastic Large Cell Lymphoma	3.94995e-08
Cluster18	spindle assembly checkpoint	1.68011e-09		Cluster25	Adenomatous Polyposis Coli	4.16298e-08
Cluster18	macromolecular complex subunit organization	1.7554e-09		Cluster25	Prostatic Intraepithelial Neoplasias	4.19286e-08
Cluster18	attachment of spindle microtubules to kinetochore	2.31879e-09		Cluster25	Carcinoma, Papillary	4.63585e-08
Cluster18	attachment of spindle microtubules to chromosome	1.01028e-08		Cluster25	Cholangiocarcinoma	4.65085e-08
Cluster18	cytoskeleton organization	1.78757e-08		Cluster25	Acute leukemia	5.52666e-08
Cluster18	microtubule anchoring	2.55933e-08		Cluster25	Chronic Obstructive Airway Disease	5.68481e-08
Cluster18	kinetochore assembly	3.53597e-08		Cluster25	Somatic mutation	6.07859e-08
Cluster18	macromolecular complex assembly	4.204e-08		Cluster25	Acute lymphocytic leukemia	6.1438e-08
Cluster18	mitotic cell cycle spindle assembly checkpoint	6.59881e-08		Cluster25	Alzheimer's Disease	6.65205e-08
Cluster18	negative regulation of mitotic metaphase/anaphase transition	8.11466e-08		Cluster25	Nephroblastoma	6.86551e-08
Cluster18	chromosome localization	9.93032e-08		Cluster25	Luminal B Breast Carcinoma	6.86551e-08
Cluster18	establishment of chromosome localization	9.93032e-08		Cluster25	Angiosarcoma of Soft Tissue	6.86551e-08
Cluster18	establishment of organelle localization	1.065e-07		Cluster25	Metastatic Endometrial Carcinoma	6.86551e-08
Cluster18	cell cycle checkpoint	1.12643e-07		Cluster25	Adult T-Cell Lymphoma/Leukemia	6.86551e-08
Cluster18	mitotic cell cycle spindle checkpoint	1.13131e-07		Cluster25	Anaplasia	6.86551e-08
Cluster18	mitotic cell cycle checkpoint	1.31331e-07		Cluster25	Mesothelioma (malignant, clinical disorder) (disorder)	6.86551e-08
Cluster18	negative regulation of mitosis	1.31331e-07		Cluster25	Noninfiltrating Intraductal Carcinoma	8.07182e-08
Cluster18	negative regulation of nuclear division	1.31331e-07		Cluster25	Hamartoma Syndrome, Multiple	8.22557e-08
Cluster18	mitotic sister chromatid segregation	1.56861e-07		Cluster25	Leukocyte adhesion deficiency type 1	8.28844e-08
Cluster18	organelle localization	1.56861e-07		Cluster25	Malignant neoplasm of liver	8.79386e-08
Cluster18	centromere complex assembly	1.8813e-07		Cluster25	tumor vasculature	9.20301e-08
Cluster18	regulation of cell cycle process	2.26269e-07		Cluster25	Tumor necrosis	9.80208e-08
Cluster18	regulation of cell cycle arrest	2.50946e-07		Cluster25	Pancreatic Ductal Adenocarcinoma	1.14121e-07
Cluster18	sister chromatid segregation	2.50946e-07		Cluster25	Tuberous Sclerosis	1.15185e-07
Cluster18	regulation of mitotic metaphase/anaphase transition	2.93542e-07		Cluster25	Hepatic methionine adenosyltransferase deficiency	1.15334e-07
Cluster18	chromatin modification	6.44392e-07		Cluster25	Carcinoid tumor no ICD-O subtype	1.31738e-07
Cluster18	negative regulation of organelle organization	2.10235e-06		Cluster25	Uveal melanoma	1.35211e-07
Cluster18	metaphase plate congression	2.33177e-06		Cluster25	Bronchioloalveolar Adenocarcinoma	1.44432e-07
Cluster18	chromatin organization	2.45626e-06		Cluster25	androgen independent prostate cancer	1.49094e-07
Cluster18	cellular component assembly at cellular level	3.59518e-06		Cluster25	Macroencephaly	1.49591e-07
Cluster18	regulation of mitotic cell cycle	4.22231e-06		Cluster25	Leukemogenesis	1.59463e-07
Cluster18	protein localization to chromosome	7.95171e-06		Cluster25	breast adenocarcinoma	1.59463e-07
Cluster18	organelle assembly	1.07176e-05		Cluster25	Uterine Fibroids	1.64536e-07
Cluster18	cellular component assembly	1.13929e-05		Cluster25	Skin endocrine disorder	1.75537e-07
Cluster18	maintenance of protein location in cell	1.42405e-05		Cluster25	Congenital chromosomal disease	1.78631e-07
Cluster18	regulation of mitosis	1.42405e-05		Cluster25	Hemimegalencephaly	1.78631e-07
Cluster18	regulation of nuclear division	1.42405e-05		Cluster25	Hepatitis C	1.78631e-07
Cluster18	negative regulation of cell cycle process	1.9324e-05		Cluster25	Meningioma	1.95756e-07
Cluster18	maintenance of location in cell	2.3936e-05		Cluster25	SHORT syndrome	2.11061e-07
Cluster18	maintenance of protein location	2.54369e-05		Cluster25	Ataxia Telangiectasia	2.32383e-07
Cluster18	regulation of chromosome segregation	3.3313e-05		Cluster25	Hyperplasia	2.41884e-07
Cluster18	protein localization	3.92749e-05		Cluster25	Non-Neoplastic Disorder	2.42787e-07
Cluster18	cellular localization	3.92749e-05		Cluster25	Conventional (Clear Cell) Renal Cell Carcinoma	2.44581e-07
Cluster18	cellular component biogenesis	4.90868e-05		Cluster25	Hyperglycemia	2.47052e-07
Cluster18	mitotic metaphase plate congression	5.69385e-05		Cluster25	Endometrial Carcinoma	2.52726e-07
Cluster18	regulation of exit from mitosis	5.69385e-05		Cluster25	Papillary adenocarcinoma	2.52726e-07
Cluster18	regulation of cell cycle	5.86242e-05		Cluster25	Liver and Intrahepatic Biliary Tract Carcinoma	2.61854e-07
Cluster18	maintenance of location	6.64074e-05		Cluster25	Precursor Cell Lymphoblastic Leukemia Lymphoma	2.78687e-07
Cluster18	regulation of organelle organization	0.000115115		Cluster25	Acute Erythroblastic Leukemia	2.82322e-07
Cluster18	spindle organization	0.000125684		Cluster25	Atypical teratoid/rhabdoid tumor	3.12407e-07
Cluster18	establishment of mitotic spindle orientation	0.000137568		Cluster25	Malignant neoplasm of kidney	3.36188e-07
Cluster18	establishment of spindle orientation	0.000137568		Cluster25	Myxoma	3.55971e-07
Cluster18	DNA metabolic process	0.000142097		Cluster25	Carcinoid Tumor	3.61265e-07
Cluster18	negative regulation of cellular component organization	0.000166125		Cluster25	Multiple malignancy	3.97863e-07
Cluster18	establishment or maintenance of cell polarity	0.000208934		Cluster25	Neoplastic Syndromes, Hereditary	3.97863e-07
Cluster18	establishment of mitotic spindle localization	0.000216227		Cluster25	Impaired glucose tolerance	4.00119e-07
Cluster18	macromolecule localization	0.00022229		Cluster25	Malignant neoplasm tonsil	4.17426e-07
Cluster18	establishment of spindle localization	0.000263614		Cluster25	Extrahepatic Cholangiocarcinoma	4.17426e-07
Cluster18	cellular protein localization	0.000382078		Cluster25	Fibroid Tumor	4.28979e-07
Cluster18	cellular macromolecule localization	0.000396885		Cluster25	Familial ependymoma	5.06389e-07
Cluster18	spindle localization	0.000452914		Cluster25	Myeloid Leukemia	5.27435e-07
Cluster18	microtubule-based movement	0.000500948		Cluster25	Schizophrenia	5.27435e-07
Cluster18	mitotic spindle organization	0.00136868		Cluster25	Pituitary Diseases	5.77246e-07
Cluster18	protein complex subunit organization	0.00138391		Cluster25	Philadelphia chromosome-positive acute lymphoblastic leukemia	5.92131e-07
Cluster18	regulation of microtubule cytoskeleton organization	0.00145068		Cluster25	Hypocholesterolemia	5.97365e-07
Cluster18	negative regulation of cell cycle	0.0024319		Cluster25	Metastatic Renal Cell Cancer	5.97365e-07
Cluster18	regulation of microtubule polymerization or depolymerization	0.00245087		Cluster25	Carcinoma of larynx	6.26214e-07
Cluster18	anaphase-promoting complex-dependent proteasomal ubiquitin-dependent protein catabolic process	0.0024679		Cluster25	Pulmonary Valve Stenosis	6.54841e-07
Cluster18	regulation of microtubule-based process	0.00257367		Cluster25	Tonsillar Carcinoma	6.54841e-07
Cluster18	cellular protein complex assembly	0.00316938		Cluster25	Chondrosarcoma	7.60441e-07
Cluster18	M phase of meiotic cell cycle	0.00438911		Cluster25	Downward slant of palpebral fissure	8.30163e-07
Cluster18	meiosis	0.00438911		Cluster25	Vaccinia	8.31622e-07
Cluster18	meiotic cell cycle	0.00510576		Cluster25	Acanthosis Nigricans	8.81569e-07
Cluster18	establishment of cell polarity	0.00510576		Cluster25	Hypertrophic Cardiomyopathy	1.00044e-06
Cluster18	protein complex assembly	0.00651131		Cluster25	Uterine Cancer	1.00137e-06
Cluster18	microtubule organizing center organization	0.00652531		Cluster25	Adenosquamous cell lung cancer	1.04516e-06
Cluster18	protein complex biogenesis	0.0066984		Cluster25	Ganglioneuromatosis	1.04516e-06
Cluster18	establishment of localization in cell	0.00903502		Cluster25	PTEN Hamartoma Tumor Syndrome	1.04516e-06
Cluster18	negative regulation of ubiquitin-protein ligase activity involved in mitotic cell cycle	0.0135323		Cluster25	Renal carcinoma	1.0558e-06
Cluster18	cytokinesis	0.016071		Cluster25	Melanocytic nevus	1.0558e-06
Cluster18	negative regulation of ligase activity	0.0165021		Cluster25	Follicular thyroid carcinoma	1.06607e-06
Cluster18	negative regulation of ubiquitin-protein ligase activity	0.0165021		Cluster25	neurofibroma	1.16177e-06
Cluster18	regulation of ubiquitin-protein ligase activity involved in mitotic cell cycle	0.020094		Cluster25	Gastrointestinal Carcinoid Tumor	1.17744e-06
Cluster18	regulation of cellular component organization	0.020393		Cluster25	Epithelioma	1.27567e-06
Cluster18	inositol lipid-mediated signaling	0.020393		Cluster25	Squamous cell carcinoma of lung	1.3342e-06
Cluster18	phosphatidylinositol-mediated signaling	0.020393		Cluster25	Systemic Scleroderma	1.35813e-06
Cluster18	negative regulation of protein ubiquitination	0.0270877		Cluster25	Autistic Disorder	1.3746e-06
Cluster18	localization	0.0277331		Cluster25	Anaplastic large B-cell lymphoma	1.45173e-06
Cluster18	proteasomal ubiquitin-dependent protein catabolic process	0.0288746		Cluster25	Breast cancer, lobular	1.45173e-06
Cluster18	proteasomal protein catabolic process	0.0292945		Cluster25	Congenital abnormality of vein	1.45173e-06
Cluster18	regulation of ubiquitin-protein ligase activity	0.0330164		Cluster25	Isochromosomes	1.47222e-06
Cluster18	regulation of ligase activity	0.0359141		Cluster25	Mesenchymal Cell Neoplasm	1.47222e-06
Cluster18	mRNA transport	0.0378173		Cluster25	Insulin Resistance	1.52913e-06
Cluster19	Golgi vesicle transport	2.81182e-27		Cluster25	Urothelial Carcinoma	1.52913e-06
Cluster19	vesicle coating	3.52859e-25		Cluster25	ECTRODACTYLY, ECTODERMAL DYSPLASIA, AND CLEFT LIP/PALATE SYNDROME 1	1.55454e-06
Cluster19	membrane budding	1.69652e-24		Cluster25	Hepatitis B	1.60778e-06
Cluster19	vesicle targeting, to, from or within Golgi	1.47831e-22		Cluster25	Mammary adenocarcinoma	1.69128e-06
Cluster19	vesicle-mediated transport	3.95934e-21		Cluster25	Hypertensive disease	1.75619e-06
Cluster19	cellular membrane organization	1.16738e-20		Cluster25	Cervix carcinoma	1.86583e-06
Cluster19	membrane organization	1.16738e-20		Cluster25	Lymphoproliferative Disorders	1.86689e-06
Cluster19	protein transport	1.46209e-20		Cluster25	Primary Lesion	1.87322e-06
Cluster19	vesicle targeting	1.9244e-20		Cluster25	Aplasia Cutis Congenita	1.87731e-06
Cluster19	establishment of protein localization	2.2011e-20		Cluster25	Familial multiple trichoepitheliomata	1.97784e-06
Cluster19	vesicle organization	4.02999e-19		Cluster25	Invasive Lobular Breast Carcinoma	2.02037e-06
Cluster19	establishment of vesicle localization	4.84207e-19		Cluster25	Primary Myelofibrosis	2.02686e-06
Cluster19	intracellular transport	5.03361e-19		Cluster25	Stage IV Bladder Cancer AJCC v6	2.02686e-06
Cluster19	intracellular protein transport	1.06324e-17		Cluster25	Ductal Breast Carcinoma	2.11948e-06
Cluster19	protein localization	2.87588e-17		Cluster25	NEUROFIBROMATOSIS, TYPE 1-LIKE SYNDROME	2.34109e-06
Cluster19	vesicle localization	4.124e-17		Cluster25	Papillary hidradenoma	2.34109e-06
Cluster19	establishment of localization in cell	1.58322e-15		Cluster25	Gastrinoma	2.35881e-06
Cluster19	macromolecule localization	1.62863e-15		Cluster25	Scleroderma	2.57969e-06
Cluster19	regulation of defense response to virus by virus	2.33152e-15		Cluster25	Heart Diseases	2.58673e-06
Cluster19	establishment of organelle localization	7.68769e-15		Cluster25	Adenocarcinoma, Clear Cell	2.70877e-06
Cluster19	cellular protein localization	2.61174e-14		Cluster25	Alveolar rhabdomyosarcoma	2.74933e-06
Cluster19	cellular macromolecule localization	2.79476e-14		Cluster25	Sezary Syndrome	2.80114e-06
Cluster19	cellular localization	1.11641e-13		Cluster25	Von Hippel-Lindau Syndrome	3.32738e-06
Cluster19	transport	1.83776e-13		Cluster25	Rectal Carcinoma	3.32738e-06
Cluster19	establishment of localization	3.52586e-13		Cluster25	Rheumatoid Arthritis	3.59706e-06
Cluster19	COPI coating of Golgi vesicle	5.11136e-13		Cluster25	Anoxia	3.6064e-06
Cluster19	COPI-coated vesicle budding	5.11136e-13		Cluster25	Carcinoma, Neuroendocrine	3.63478e-06
Cluster19	Golgi transport vesicle coating	5.11136e-13		Cluster25	Adenocarcinoma of prostate	3.79306e-06
Cluster19	Golgi vesicle budding	5.11136e-13		Cluster25	Pectus excavatum	3.79667e-06
Cluster19	organelle localization	1.41554e-12		Cluster25	Endometrioid carcinoma ovary	3.87096e-06
Cluster19	retrograde vesicle-mediated transport, Golgi to ER	2.26927e-12		Cluster25	Nonmedullary Thyroid Carcinoma	3.87096e-06
Cluster19	regulation of defense response to virus	2.86132e-12		Cluster25	Malignant Fibrous Histiocytoma	4.13426e-06
Cluster19	antigen processing and presentation	1.48435e-11		Cluster25	Chronic eosinophilic leukemia	4.6201e-06
Cluster19	regulation of response to biotic stimulus	3.76435e-11		Cluster25	Adenoid Cystic Carcinoma	5.1343e-06
Cluster19	localization	3.42652e-10		Cluster25	Plasma Cell Neoplasm	5.26116e-06
Cluster19	COPII vesicle coating	3.80644e-10		Cluster25	Cardio-facio-cutaneous syndrome	5.26116e-06
Cluster19	COPII-coated vesicle budding	3.80644e-10		Cluster25	Idiopathic pulmonary arterial hypertension	5.80666e-06
Cluster19	vesicle targeting, rough ER to cis-Golgi	3.80644e-10		Cluster25	Heartburn	5.91847e-06
Cluster19	antigen processing and presentation of peptide antigen	4.16036e-10		Cluster25	Impaired cognition	5.9928e-06
Cluster19	regulation of multi-organism process	4.55668e-10		Cluster25	Adenocarcinoma of colon	6.13397e-06
Cluster19	antigen processing and presentation of peptide antigen via MHC class I	6.05339e-09		Cluster25	Infected ascites	6.37716e-06
Cluster19	negative regulation of ERBB signaling pathway	6.30646e-09		Cluster25	Severe Combined Immunodeficiency	6.46871e-06
Cluster19	negative regulation of epidermal growth factor receptor signaling pathway	6.30646e-09		Cluster25	Adenosquamous carcinoma	6.46871e-06
Cluster19	regulation of immune effector process	1.78725e-08		Cluster25	Oropharyngeal disorders	6.46871e-06
Cluster19	ER to Golgi vesicle-mediated transport	2.78573e-08		Cluster25	Immunologic Deficiency Syndromes	6.52913e-06
Cluster19	post-Golgi vesicle-mediated transport	8.18534e-08		Cluster25	Lymphoma, T-Cell, Cutaneous	6.83843e-06
Cluster19	regulation of ERBB signaling pathway	9.05143e-08		Cluster25	Attention Deficit Disorder	6.86164e-06
Cluster19	regulation of epidermal growth factor receptor signaling pathway	9.05143e-08		Cluster25	Pericardial effusion	6.86164e-06
Cluster19	protein N-linked glycosylation via asparagine	2.52804e-07		Cluster25	TARSAL-CARPAL COALITION SYNDROME	6.91862e-06
Cluster19	peptidyl-asparagine modification	2.95957e-07		Cluster25	T-Cell Lymphoma	6.93241e-06
Cluster19	protein N-linked glycosylation	3.44751e-07		Cluster25	Gastroesophageal reflux disease	7.17051e-06
Cluster19	regulation of defense response	1.35371e-06		Cluster25	Adenoma	7.19751e-06
Cluster19	intra-Golgi vesicle-mediated transport	1.47749e-06		Cluster25	Biliary Tract Cancer	7.50111e-06
Cluster19	endocytosis	1.39874e-05		Cluster25	Colonic Polyps	8.67105e-06
Cluster19	regulation of immune system process	1.44552e-05		Cluster25	Helicobacter pylori (H. pylori) infection in conditions classified elsewhere and of unspecified site	8.77031e-06
Cluster19	post-translational protein modification	2.25094e-05		Cluster25	Polycythemia Vera	8.84504e-06
Cluster19	ERBB signaling pathway	2.25094e-05		Cluster25	Salivary duct carcinoma	8.87743e-06
Cluster19	epidermal growth factor receptor signaling pathway	2.25094e-05		Cluster25	Thymic Carcinoma	8.87743e-06
Cluster19	macromolecule glycosylation	2.89773e-05		Cluster25	Cardiomyopathy, Familial Idiopathic	9.29855e-06
Cluster19	protein glycosylation	2.89773e-05		Cluster25	Intestinal Neoplasms	9.34979e-06
Cluster19	glycosylation	3.06742e-05		Cluster25	Obesity	9.88921e-06
Cluster19	glycoprotein biosynthetic process	4.00912e-05		Cluster25	Anaplastic carcinoma	9.88921e-06
Cluster19	cellular component organization	4.05532e-05		Cluster25	Renal fibrosis	1.00329e-05
Cluster19	antigen processing and presentation of exogenous peptide antigen via MHC class I, TAP-independent	4.40514e-05		Cluster25	Anemia	1.02835e-05
Cluster19	viral reproduction	4.73584e-05		Cluster25	HIV Infections	1.04743e-05
Cluster19	regulation of response to stress	5.6843e-05		Cluster25	Aortic Valve Insufficiency	1.1063e-05
Cluster19	cellular component organization or biogenesis	7.56988e-05		Cluster25	Ovarian Cysts	1.12962e-05
Cluster19	interferon-gamma-mediated signaling pathway	8.56013e-05		Cluster25	Neuroectodermal Tumors	1.12962e-05
Cluster19	glycoprotein metabolic process	0.00017759		Cluster25	Stage II Colon Cancer AJCC v7	1.12962e-05
Cluster19	cellular response to interferon-gamma	0.000180849		Cluster25	Secondary Glioblastoma	1.1637e-05
Cluster19	carbohydrate derivative biosynthetic process	0.000190847		Cluster25	Agenesis of corpus callosum	1.1637e-05
Cluster19	cellular carbohydrate metabolic process	0.000263597		Cluster25	Rous Sarcoma	1.16762e-05
Cluster19	nerve growth factor receptor signaling pathway	0.000321068		Cluster25	Hodgkin Disease	1.20681e-05
Cluster19	response to interferon-gamma	0.000331214		Cluster25	Carcinoma, Large Cell	1.29149e-05
Cluster19	antigen processing and presentation of peptide or polysaccharide antigen via MHC class II	0.000363326		Cluster25	helicobacter pylori infection	1.29149e-05
Cluster19	antigen processing and presentation of exogenous peptide antigen	0.00277131		Cluster25	Diarrhea	1.30158e-05
Cluster19	organelle organization	0.00281167		Cluster25	Bannayan-Riley-Ruvalcaba Syndrome	1.30943e-05
Cluster19	antigen processing and presentation of exogenous antigen	0.0028465		Cluster25	CARCINOMA INTESTINAL	1.30943e-05
Cluster19	regulation of response to stimulus	0.00362085		Cluster25	Serous cystadenocarcinoma ovary	1.30943e-05
Cluster19	axon guidance	0.00380357		Cluster25	Congenital hypoplasia of lung	1.36751e-05
Cluster19	synaptic transmission	0.00518031		Cluster25	Erythroblastosis	1.36751e-05
Cluster19	cellular component organization at cellular level	0.0053317		Cluster25	LATERAL MENINGOCELE SYNDROME	1.36751e-05
Cluster19	peptidyl-amino acid modification	0.00727666		Cluster25	LIMB-MAMMARY SYNDROME	1.36751e-05
Cluster19	cellular component organization or biogenesis at cellular level	0.00856058		Cluster25	Stage II Colon Cancer	1.40401e-05
Cluster19	cytokine-mediated signaling pathway	0.00903258		Cluster25	Keloid	1.40404e-05
Cluster19	negative regulation of signal transduction	0.0102436		Cluster25	Phyllodes Tumor	1.44096e-05
Cluster19	transmission of nerve impulse	0.0102436		Cluster25	aggressive cancer	1.44096e-05
Cluster19	negative regulation of response to stimulus	0.0102436		Cluster25	Cancer of Head and Neck	1.44096e-05
Cluster19	multicellular organismal signaling	0.0111809		Cluster25	Carcinoma, Small Cell	1.48452e-05
Cluster19	carbohydrate metabolic process	0.011493		Cluster25	Experimental Organism Basal Cell Carcinoma	1.49074e-05
Cluster19	transmembrane receptor protein tyrosine kinase signaling pathway	0.0115649		Cluster25	Cutaneous Melanoma	1.51382e-05
Cluster19	axonogenesis	0.0132734		Cluster25	Influenza	1.51862e-05
Cluster19	negative regulation of signaling	0.0136931		Cluster25	Infection	1.52849e-05
Cluster19	negative regulation of cell communication	0.0137289		Cluster25	Single tumor	1.59392e-05
Cluster19	cell morphogenesis involved in neuron differentiation	0.0178213		Cluster25	Papillary and follicular adenocarcinoma	1.60684e-05
Cluster19	receptor-mediated endocytosis	0.0187713		Cluster25	Luminal A Breast Carcinoma	1.6108e-05
Cluster19	carbohydrate derivative metabolic process	0.0191692		Cluster25	cervical cancer	1.63832e-05
Cluster19	antigen processing and presentation of exogenous peptide antigen via MHC class I, TAP-dependent	0.0191692		Cluster25	Concave bridge of nose	1.69571e-05
Cluster19	neuron projection morphogenesis	0.0194057		Cluster25	Depressed nasal bridge	1.69571e-05
Cluster19	antigen processing and presentation of exogenous peptide antigen via MHC class I	0.0202569		Cluster25	Depressed nasal root/bridge	1.69571e-05
Cluster19	cellular response to cytokine stimulus	0.0202569		Cluster25	Prostate cancer recurrent	1.71791e-05
Cluster19	translation	0.0213711		Cluster25	Skin carcinoma	1.77884e-05
Cluster19	immune system process	0.0219257		Cluster25	Polymicrogyria	1.83142e-05
Cluster19	organic substance metabolic process	0.022022		Cluster25	Human papilloma virus infection	1.84939e-05
Cluster19	chemotaxis	0.0255618		Cluster25	Pulmonary Stenosis	1.84939e-05
Cluster19	taxis	0.0255618		Cluster25	Malignant tumor of cervix	1.88053e-05
Cluster19	regulation of immune response	0.0262975		Cluster25	Squamous cell carcinoma of tongue	1.89828e-05
Cluster19	neuron projection development	0.0291142		Cluster25	Amyloidosis	1.93692e-05
Cluster19	cell projection morphogenesis	0.034069		Cluster25	Angiogenic Switch	2.06729e-05
Cluster19	cell morphogenesis involved in differentiation	0.0341531		Cluster25	Macrocephaly	2.12687e-05
Cluster19	cell part morphogenesis	0.0370869		Cluster25	Steroid Sulfatase Deficiency Disease	2.17037e-05
Cluster19	enzyme linked receptor protein signaling pathway	0.0384351		Cluster25	Thyroid Gland Follicular Adenoma	2.17037e-05
Cluster19	innate immune response	0.0428116		Cluster25	Carcinoma ex pleomorphic adenoma	2.19201e-05
Cluster19	regulation of endocytosis	0.043516		Cluster25	Venous malformation	2.19201e-05
Cluster19	response to cytokine stimulus	0.0464035		Cluster25	Malignant Squamous Cell Neoplasm	2.24842e-05
Cluster19	positive regulation of immune response	0.0487447		Cluster25	Donohue Syndrome	2.33192e-05
Cluster2	microtubule-based movement	9.2128e-24		Cluster25	Primary acquired melanosis	2.33192e-05
Cluster2	microtubule-based process	2.83662e-20		Cluster25	Intrahepatic Cholangiocarcinoma	2.34861e-05
Cluster2	cellular component movement	1.24997e-10		Cluster25	Hemangioma	2.37941e-05
Cluster2	M phase	2.85743e-10		Cluster25	Virus Diseases	2.38751e-05
Cluster2	M phase of mitotic cell cycle	3.53089e-09		Cluster25	Skin Neoplasms	2.4652e-05
Cluster2	cell cycle process	5.56258e-09		Cluster25	Carcinosarcoma	2.4895e-05
Cluster2	mitosis	4.43035e-08		Cluster25	Gastric Adenocarcinoma	2.52959e-05
Cluster2	nuclear division	4.43035e-08		Cluster25	Coronary Artery Disease	2.67574e-05
Cluster2	organelle fission	5.86212e-08		Cluster25	Dysgerminoma	2.97083e-05
Cluster2	cell cycle phase	7.15072e-08		Cluster25	Thymoma, type C	2.97083e-05
Cluster2	cell cycle	8.09107e-08		Cluster25	Psoriasis	3.20331e-05
Cluster2	mitotic cell cycle	2.48171e-07		Cluster25	Blast Phase	3.24639e-05
Cluster2	organelle organization	2.54833e-07		Cluster25	Diabetes	3.25321e-05
Cluster2	cell division	4.87012e-07		Cluster25	Diabetes Mellitus	3.27526e-05
Cluster2	spindle organization	6.67032e-07		Cluster25	Lymphedema	3.36107e-05
Cluster2	microtubule cytoskeleton organization	8.34393e-07		Cluster25	Adenocarcinoma of large intestine	3.37154e-05
Cluster2	microtubule-based transport	1.08357e-06		Cluster25	Merkel cell carcinoma	3.50012e-05
Cluster2	cytoskeleton-dependent intracellular transport	1.55267e-06		Cluster25	Mixed Salivary Gland Tumor	3.50012e-05
Cluster2	cytokinesis	1.84378e-05		Cluster25	Leukemia, T-Cell	3.5889e-05
Cluster2	negative regulation of organelle organization	2.16573e-05		Cluster25	insulinoma	3.60575e-05
Cluster2	cellular component organization at cellular level	2.52819e-05		Cluster25	Byzanthine arch palate	3.64989e-05
Cluster2	mitotic cell cycle spindle checkpoint	2.54745e-05		Cluster25	Barrett's Adenocarcinoma	3.81232e-05
Cluster2	anaphase-promoting complex-dependent proteasomal ubiquitin-dependent protein catabolic process	2.94173e-05		Cluster25	Ichthyosis, X-Linked	3.82878e-05
Cluster2	spindle checkpoint	3.41897e-05		Cluster25	Adrenocortical carcinoma	3.8451e-05
Cluster2	cellular component organization or biogenesis at cellular level	3.73179e-05		Cluster25	Trisomy	3.8451e-05
Cluster2	spindle assembly	3.99086e-05		Cluster25	Lipomatosis	3.8451e-05
Cluster2	regulation of mitotic metaphase/anaphase transition	4.29933e-05		Cluster25	Multiple Endocrine Neoplasia Type 2b	3.8451e-05
Cluster2	spindle assembly involved in mitosis	5.01726e-05		Cluster25	NEVUS, EPIDERMAL (disorder)	3.8451e-05
[truncated: 4,800 more rows]

## Sheet: S3G. Enrich detail (vNPC)
Supplmentary Table S3G. Full list of Arboretum-hic clusters of vNPC enriched for functional pathways and diseases
[truncated: 5,642 more rows]

[truncated: 1 more sheets: S3H. Enrich detail (vNeuron)]
