# Supplementary material for: Identification of FMR1-regulated molecular networks in human neurodevelopment
Source: HighWire-hosted journal article supplement (doi:10.1101/gr.251405.119), 2020-03-01
Supplement: Supplemental_Table_S4.xlsx [file Supplemental_Table_S4.xlsx]

## Sheet: S4A. Shared genes and function
Supplmental Table S4A. Summary: List of top 1% ranked genes that are shared across different cell types, their network cluster assignment and associated functions
											Summary of clusters and genes discussed in manuscript (all common)
Top 1% Genes	Overlap of top 1% ranked genes				Cluster assignments				Known neurological functions		Common
	dNPC	vNPC	dneuron	vneuron	dNPC	vNPC	dneuron	vneuron			Functional enrichment
SPTAN1	1	1	1	1	Cluster24	Cluster42	Cluster12	Cluster12	axon guidance		Cluster ID	Oberved pattern	Related Genes	Function enrichment (neuronal)	Function enrichment (general)
SNRNP200	1	1	1	1	Cluster26	Cluster26	Cluster26	Cluster26			Cluster14	common	EIF4G1		ribosome
SF3B2	1	1	1	1	Cluster26	Cluster26	Cluster26	Cluster26			Cluster16	common	RB1	nervous_system_development	chromatin remodeling, regulation_of_gene_expression
RB1	1	1	1	1	Cluster16	Cluster16	Cluster16	Cluster16	neuron differentiation		Cluster18	common	NUP133		cell cycle regulation
PTPN11	1	1	1	1	Cluster25	Cluster25	Cluster25	Cluster25	axon guidance		Cluster19	common	AP2A1	cell_morphogenesis_involved_in_neuron_differentiation	vesicle-mediated_transport
PRKDC	1	1	1	1	Cluster4	Cluster4	Cluster35	Cluster35	brain development		Cluster25	common	FYN;PTPN11	neuron_development	enzyme_linked_receptor_protein_signaling_pathway
POLR2B	1	1	1	1	Cluster26	Cluster26	Cluster26	Cluster26			Cluster26	common	SF3B2;SNRNP200;POLR2B		RNA processing, tranport, gene expression
NUP133	1	1	1	1	Cluster18	Cluster18	Cluster18	Cluster18	neurogenesis		Cluster29	common	MTOR		growth factor mediated signaling
MTOR	1	1	1	1	Cluster29	Cluster29	Cluster29	Cluster29	brain development
KPNB1	1	1	1	1	Cluster18	Cluster18	Cluster28	Cluster18				Common
FYN	1	1	1	1	Cluster25	Cluster25	Cluster25	Cluster25	axon guidance			Disease association
EP300	1	1	1	1	Cluster16	Cluster16	Cluster31	Cluster31	nervous system development			Disease name	Hypergeometric FDR	Related Genes
EIF4G1	1	1	1	1	Cluster14	Cluster14	Cluster14	Cluster14	embryonic brain development, neural plate development			Global developmental delay	0.0911078	CTNNB1;EP300;RB1
CTNNB1	1	1	1	1	Cluster17	Cluster42	Cluster29	Cluster38				Intellectual Disability	0.0016638	CREBBP;CTNNB1;EP300;MTOR;RB1;SNRNP200;SPTAN1
CREBBP	1	1	1	1	Cluster16	Cluster16	Cluster31	Cluster31				Neurodegenerative Disorders	0.0016755	ABL1;CREBBP;CTNNB1;FYN;MTOR;SPTAN1
AP2A1	1	1	1	1	Cluster19	Cluster19	Cluster19	Cluster19
ABL1	1	1	1	1	Cluster20	Cluster42	Cluster25	Cluster25	neural tube closure, neuroepithelial cell differentiation		Summary of clusters and genes discussed in manuscript (NPC common)
STRN4	1	1	0	0	Cluster36	Cluster36	Cluster36	Cluster36	dendritic spine		NPC-common
STAG2	1	1	0	0	Cluster13	Cluster27	Cluster13	Cluster13			Functional enrichment
SMC3	1	1	0	0	Cluster13	Cluster27	Cluster13	Cluster13	stem cell population maintenance		Cluster ID	Oberved pattern	Related Genes	Function enrichment (neuronal)	Function enrichment (general)
SMC1A	1	1	0	0	Cluster26	Cluster26	Cluster26	Cluster13	stem cell population maintenance		Cluster4	NPC-common, neuron-common	ATM		DNA_repair, cell_cycle, regulation_of_transcription,_DNA-dependent
SF3B1	1	1	0	0	Cluster26	Cluster26	Cluster26	Cluster26			Cluster15	NPC-common, neuron-common	HSPA4		mitochondrial membrane organization, cellular_membrane_organization
PRPF6	1	1	0	0	Cluster26	Cluster26	Cluster26	Cluster26
PPP2R2C	1	1	0	0	Cluster36	Cluster36	Cluster36	Cluster36				NPC-common
PPP2R1A	1	1	0	0	Cluster14	Cluster14	Cluster14	Cluster27	dendrite			Disease association
MED12	1	1	0	0	Cluster31	Cluster31	Cluster31	Cluster31	embryonic brain development			Disease name	Hypergeometric FDR	Related Genes
MCM2	1	1	0	0	Cluster35	Cluster35	Cluster35	Cluster35				Global developmental delay	0.0485342	HSPA4;MED12;PPP2R1A;SMC1A;SMC3
KAT5	1	1	0	0	Cluster16	Cluster44	Cluster32	Cluster32				Intellectual Disability	0.0490216	MED12;PPP2R1A;PRPF6;SMC1A;SMC3;STAG2
HSPA4	1	1	0	0	Cluster15	Cluster15	Cluster29	Cluster29				Neurodegenerative Disorders	0.24225	ATM;HSPA4;KAT5
HNRNPUL1	1	1	0	0	Cluster26	Cluster26	Cluster26	Cluster26
HDAC1	1	1	0	0	Cluster16	Cluster34	Cluster34	Cluster34	neuron differentiation
DHX38	1	1	0	0	Cluster26	Cluster26	Cluster26	Cluster26
CDC5L	1	1	0	0	Cluster26	Cluster26	Cluster26	Cluster26	cellular response to nerve growth factor stimulus
CCT7	1	1	0	0	Cluster36	Cluster36	Cluster36	Cluster36
CCT6A	1	1	0	0	Cluster36	Cluster36	Cluster36	Cluster36
CCT4	1	1	0	0	Cluster36	Cluster36	Cluster36	Cluster36
ATM	1	1	0	0	Cluster4	Cluster4	Cluster4	Cluster13	brain development		Summary of clusters and genes discussed in manuscript (Neuron common)
PPFIA2	0	0	1	1	Cluster42	Cluster1	Cluster36	Cluster12	neurotransmitter secretion		Neuron-common
PKN1	0	0	1	1	Cluster20	Cluster20	Cluster20	Cluster20			Functional enrichment
PIK3CB	0	0	1	1	Cluster25	Cluster1	Cluster25	Cluster25	axon guidance		Cluster ID	Oberved pattern	Related Genes	Function enrichment (neuronal)	Function enrichment (general)
PIK3CA	0	0	1	1	Cluster25	Cluster25	Cluster25	Cluster25	axon guidance		Cluster12	neuron-common	ANK1	axon_guidence, generation_of_neurons, synapse_organization
KIT	0	0	1	1	Cluster25	Cluster25	Cluster25	Cluster25			Cluster20	NPC-common, neuron-common	PKN1	nerve_growth_factor_receptor_signaling_pathway	regulation of small GTPase mediated signal transduction
IRS2	0	0	1	1	Cluster25	Cluster25	Cluster25	Cluster25	axon guidance, brain development		Cluster34	neuron-common	AR	nervous_system_development	chromatin_organization, regulation of transcription, DNA-dependent
CDK2	0	0	1	1	Cluster35	Cluster35	Cluster35	Cluster35
AR	0	0	1	1	Cluster34	Cluster44	Cluster34	Cluster34				Neuron-common
ANK1	0	0	1	1	Cluster24	Cluster1	Cluster12	Cluster12	axon initial segment			Disease association
SEC24D	0	1	1	1	Cluster19	Cluster19	Cluster19	Cluster19				Disease name	Hypergeometric FDR	Related Genes
SEC24C	0	1	1	1	Cluster19	Cluster19	Cluster19	Cluster19				Fragile X Syndrome	0.000256597	AR;PIK3CA;PIK3CB
IRS1	0	1	1	1	Cluster21	Cluster25	Cluster25	Cluster25				Intellectual Disability	0.0563777	ANK1;AR;PIK3CA
CDK5	0	1	1	1	Cluster24	Cluster17	Cluster24	Cluster1				Neurodegenerative Disorders	0.0241281	AR;PIK3CA;PIK3CB
AKT1	0	1	1	1	Cluster28	Cluster42	Cluster25	Cluster25
SRC	1	1	1	0	Cluster25	Cluster25	Cluster25	Cluster25
SF3B3	1	1	1	0	Cluster26	Cluster26	Cluster26	Cluster26
PRPF8	1	1	1	0	Cluster26	Cluster26	Cluster26	Cluster26
SIN3A	1	1	0	1	Cluster16	Cluster34	Cluster34	Cluster34
PLK1	1	1	0	1	Cluster27	Cluster27	Cluster27	Cluster27
PARP1	1	1	0	1	Cluster16	Cluster16	Cluster35	Cluster35
NOTCH1	1	1	0	1	Cluster8	Cluster8	Cluster8	Cluster8
KIFAP3	1	1	0	1	Cluster27	Cluster27	Cluster17	Cluster2
KIF3B	1	1	0	1	Cluster27	Cluster27	Cluster17	Cluster2
HSP90AA1	1	1	0	1	Cluster41	Cluster41	Cluster29	Cluster29
ERBB2	1	1	0	1	Cluster5	Cluster42	Cluster25	Cluster25
DHX9	1	1	0	1	Cluster26	Cluster26	Cluster26	Cluster26
CTNNA1	1	1	0	1	Cluster38	Cluster38	Cluster38	Cluster38
CLASP1	1	1	0	1	Cluster27	Cluster27	Cluster27	Cluster27
CKAP5	1	1	0	1	Cluster27	Cluster27	Cluster27	Cluster27
AXIN1	1	1	0	1	Cluster8	Cluster8	Cluster8	Cluster38
AP2M1	1	1	0	1	Cluster19	Cluster19	Cluster19	Cluster19
HDAC5	1	0	1	1	Cluster16	Cluster34	Cluster34	Cluster34
TOPBP1	1	0	1	0	Cluster4	Cluster4	Cluster35	Cluster35
RXRA	1	0	1	0	Cluster31	Cluster31	Cluster31	Cluster31
NR3C1	1	0	1	0	Cluster34	Cluster44	Cluster34	Cluster34
BRCA2	1	0	1	0	Cluster4	Cluster2	Cluster4	Cluster4
SPTBN1	1	0	0	1	Cluster24	Cluster42	Cluster12	Cluster12
NUP107	1	0	0	1	Cluster18	Cluster18	Cluster28	Cluster18
NCOR1	1	0	0	1	Cluster27	Cluster34	Cluster34	Cluster34
KIFC3	1	0	0	1	Cluster27	Cluster27	Cluster2	Cluster2
KIF23	1	0	0	1	Cluster27	Cluster27	Cluster2	Cluster2
JUP	1	0	0	1	Cluster5	Cluster42	Cluster38	Cluster38
CHD4	1	0	0	1	Cluster16	Cluster34	Cluster34	Cluster34
CHAF1A	1	0	0	1	Cluster16	Cluster16	Cluster16	Cluster16
RUVBL2	0	1	1	0	Cluster16	Cluster16	Cluster32	Cluster32
RAC3	0	1	1	0	Cluster38	Cluster38	Cluster24	Cluster24
DYNC1H1	0	1	1	0	Cluster27	Cluster27	Cluster27	Cluster27
TOP2B	0	1	0	1	Cluster16	Cluster16	Cluster16	Cluster16
STAT1	0	1	0	1	Cluster25	Cluster25	Cluster25	Cluster25
RUVBL1	0	1	0	1	Cluster16	Cluster2	Cluster32	Cluster32
KIF2C	0	1	0	1	Cluster27	Cluster27	Cluster18	Cluster18
IQGAP1	0	1	0	1	Cluster24	Cluster24	Cluster24	Cluster24
IGF1R	0	1	0	1	Cluster5	Cluster42	Cluster25	Cluster25
SMARCA5	1	0	0	0	Cluster16	Cluster27	Cluster18	Cluster18
POLA1	1	0	0	0	Cluster4	Cluster30	Cluster35	Cluster35
NUP160	1	0	0	0	Cluster18	Cluster18	Cluster28	Cluster18
NFX1	1	0	0	0	Cluster26	Cluster26	Cluster26	Cluster26
MSH2	1	0	0	0	Cluster31	Cluster31	Cluster4	Cluster35
MCM6	1	0	0	0	Cluster35	Cluster35	Cluster35	Cluster35
MCM4	1	0	0	0	Cluster35	Cluster35	Cluster35	Cluster35
MCM3	1	0	0	0	Cluster35	Cluster35	Cluster35	Cluster35
KIF5C	1	0	0	0	Cluster27	Cluster27	Cluster2	Cluster2
KIF5A	1	0	0	0	Cluster27	Cluster27	Cluster2	Cluster2
KDM1A	1	0	0	0	Cluster16	Cluster34	Cluster34	Cluster34
HDAC3	1	0	0	0	Cluster27	Cluster34	Cluster34	Cluster34
FANCD2	1	0	0	0	Cluster4	Cluster2	Cluster4	Cluster4
DDX23	1	0	0	0	Cluster26	Cluster26	Cluster26	Cluster26
CPSF3	1	0	0	0	Cluster26	Cluster26	Cluster26	Cluster26
CLTC	1	0	0	0	Cluster19	Cluster19	Cluster19	Cluster19
BRCA1	1	0	0	0	Cluster4	Cluster4	Cluster4	Cluster13
BLM	1	0	0	0	Cluster4	Cluster4	Cluster4	Cluster4
XRCC6	0	1	0	0	Cluster4	Cluster4	Cluster35	Cluster35
UPF1	0	1	0	0	Cluster14	Cluster14	Cluster14	Cluster14
U2AF2	0	1	0	0	Cluster26	Cluster26	Cluster26	Cluster26
SSRP1	0	1	0	0	Cluster26	Cluster26	Cluster33	Cluster35
SMARCC1	0	1	0	0	Cluster16	Cluster16	Cluster16	Cluster16
SART1	0	1	0	0	Cluster26	Cluster26	Cluster26	Cluster26
PRRC2A	0	1	0	0	Cluster21	Cluster13	Cluster21	Cluster21
PRPF31	0	1	0	0	Cluster26	Cluster26	Cluster32	Cluster32
PRPF19	0	1	0	0	Cluster26	Cluster26	Cluster26	Cluster26
PPP4C	0	1	0	0	Cluster36	Cluster36	Cluster36	Cluster36
NCL	0	1	0	0	Cluster8	Cluster8	Cluster44	Cluster44
NCK1	0	1	0	0	Cluster25	Cluster25	Cluster25	Cluster25
GTF2F1	0	1	0	0	Cluster26	Cluster26	Cluster26	Cluster26
DKC1	0	1	0	0	Cluster37	Cluster37	Cluster40	Cluster37
DCTN1	0	1	0	0	Cluster7	Cluster7	Cluster27	Cluster27
CSTF2	0	1	0	0	Cluster26	Cluster26	Cluster26	Cluster26
AURKA	0	1	0	0	Cluster27	Cluster27	Cluster17	Cluster2
VEGFA	0	0	1	0	Cluster29	Cluster42	Cluster1	Cluster1
TYRO3	0	0	1	0	Cluster39	Cluster39	Cluster42	Cluster5
TRRAP	0	0	1	0	Cluster16	Cluster16	Cluster32	Cluster32
TPR	0	0	1	0	Cluster18	Cluster18	Cluster28	Cluster18
TCF19	0	0	1	0	Cluster1	Cluster45	Cluster43	Cluster15
RHOG	0	0	1	0	Cluster42	Cluster1	Cluster20	Cluster20
RHOA	0	0	1	0	Cluster42	Cluster20	Cluster20	Cluster17
PTK2B	0	0	1	0	Cluster25	Cluster25	Cluster25	Cluster25
PLXNB1	0	0	1	0	Cluster38	Cluster38	Cluster24	Cluster1
PLXNA4	0	0	1	0	Cluster24	Cluster17	Cluster24	Cluster1
PLXNA3	0	0	1	0	Cluster42	Cluster17	Cluster24	Cluster1
PLXNA2	0	0	1	0	Cluster24	Cluster17	Cluster24	Cluster1
PIK3R3	0	0	1	0	Cluster42	Cluster1	Cluster25	Cluster25
PCNA	0	0	1	0	Cluster4	Cluster4	Cluster35	Cluster35
PAK2	0	0	1	0	Cluster42	Cluster1	Cluster24	Cluster1
NUP205	0	0	1	0	Cluster18	Cluster18	Cluster28	Cluster18
NUP188	0	0	1	0	Cluster18	Cluster18	Cluster28	Cluster18
NUP155	0	0	1	0	Cluster18	Cluster18	Cluster28	Cluster18
MED26	0	0	1	0
MAPK1	0	0	1	0	Cluster39	Cluster39	Cluster25	Cluster25
KDR	0	0	1	0	Cluster42	Cluster1	Cluster25	Cluster1
FOXO1	0	0	1	0	Cluster44	Cluster44	Cluster29	Cluster29
FARP2	0	0	1	0	Cluster1	Cluster45	Cluster24	Cluster1
EPHA2	0	0	1	0	Cluster42	Cluster25	Cluster25	Cluster25
EPB41L1	0	0	1	0	Cluster3	Cluster3	Cluster38	Cluster43
EPB41	0	0	1	0	Cluster5	Cluster42	Cluster38	Cluster42
DPYSL5	0	0	1	0	Cluster42	Cluster17	Cluster24	Cluster1
DPYSL4	0	0	1	0	Cluster42	Cluster17	Cluster24	Cluster1
DPYSL3	0	0	1	0	Cluster24	Cluster24	Cluster24	Cluster24
DPYSL2	0	0	1	0	Cluster42	Cluster17	Cluster24	Cluster1
CRMP1	0	0	1	0	Cluster24	Cluster17	Cluster24	Cluster1
COPB1	0	0	1	0	Cluster19	Cluster19	Cluster19	Cluster19
COPA	0	0	1	0	Cluster19	Cluster19	Cluster19	Cluster19
CDKN1A	0	0	1	0	Cluster35	Cluster35	Cluster8	Cluster8
CDK5R1	0	0	1	0	Cluster42	Cluster17	Cluster24	Cluster1
CDK4	0	0	1	0	Cluster35	Cluster35	Cluster4	Cluster35
CCND1	0	0	1	0	Cluster35	Cluster35	Cluster8	Cluster8
CBL	0	0	1	0	Cluster25	Cluster25	Cluster25	Cluster25
ARHGEF12	0	0	1	0	Cluster38	Cluster20	Cluster20	Cluster25
ARHGEF11	0	0	1	0	Cluster39	Cluster20	Cluster20	Cluster1
ADCY8	0	0	1	0	Cluster1	Cluster45	Cluster43	Cluster43
ADCY7	0	0	1	0	Cluster1	Cluster45	Cluster39	Cluster43
ADCY2	0	0	1	0	Cluster1	Cluster45	Cluster39	Cluster43
STAT3	0	0	0	1	Cluster25	Cluster25	Cluster25	Cluster25
SREBF2	0	0	0	1	Cluster19	Cluster19	Cluster23	Cluster23
SPTBN2	0	0	0	1	Cluster24	Cluster42	Cluster12	Cluster12
SPTB	0	0	0	1	Cluster42	Cluster1	Cluster12	Cluster12
SOS1	0	0	0	1	Cluster25	Cluster25	Cluster25	Cluster25
RELA	0	0	0	1	Cluster7	Cluster7	Cluster34	Cluster34
NGF	0	0	0	1	Cluster42	Cluster1	Cluster25	Cluster25
NCOA1	0	0	0	1	Cluster31	Cluster31	Cluster31	Cluster31
KIF5B	0	0	0	1	Cluster27	Cluster27	Cluster2	Cluster2
KIF11	0	0	0	1	Cluster27	Cluster27	Cluster2	Cluster2
JAK1	0	0	0	1	Cluster25	Cluster25	Cluster25	Cluster25
INSR	0	0	0	1	Cluster17	Cluster25	Cluster25	Cluster25
HLA-C	0	0	0	1	Cluster19	Cluster19	Cluster19	Cluster19
ERCC6L	0	0	0	1
EIF3F	0	0	0	1	Cluster22	Cluster43	Cluster22	Cluster14
DNM2	0	0	0	1	Cluster20	Cluster20	Cluster19	Cluster19
CLASP2	0	0	0	1	Cluster27	Cluster27	Cluster18	Cluster18
CDC20	0	0	0	1	Cluster32	Cluster27	Cluster18	Cluster18
CD2AP	0	0	0	1	Cluster42	Cluster24	Cluster24	Cluster24
BUB1B	0	0	0	1	Cluster32	Cluster27	Cluster18	Cluster18
BUB1	0	0	0	1	Cluster18	Cluster18	Cluster18	Cluster18
BCAR1	0	0	0	1	Cluster25	Cluster25	Cluster25	Cluster25
AURKB	0	0	0	1	Cluster32	Cluster27	Cluster18	Cluster18
AP2A2	0	0	0	1	Cluster19	Cluster19	Cluster19	Cluster19
ANK2	0	0	0	1	Cluster24	Cluster42	Cluster12	Cluster12

## Sheet: S4B. Ranked gene list (dNPC)
Supplmental Table S4B. Full list of ranked genes in dNPC
	Percentile			Percentil rank score of gene, which is simultaneously based on diffusion score + Number of CLIP hits + CLIP-seq value fold change
	Diffusion score			Percentile rank score of genes based on integrative network node diffsuion of CLIP targets and RNA-seq DEGs
	Number of neighbors CLIP hits			Number of direct connection to CLIP target in the network
	CLIP-seq value fold change			Normalized fold change values derieved from CLIP-seq measurement
	Hits			Identification of hits in experiments; CLIP=CLIP-seq hit, RNA=DEG from RNA-seq, CLIP&RNA =
	Cluster ID			Cluster assignment ID from network-based clustering
Rank	Gene ID	Percentile	Diffusion score	Number of neighbors CLIP hits	CLIP-seq value fold change	Hits	Cluster ID
1	PRKDC	100	99.705	17	3.80726	CLIP	Cluster4
2	CTNNB1	99.9882	99.823	29	2.34169	CLIP	Cluster17
3	EIF4G1	99.9764	99.528	12	3.51308	CLIP	Cluster14
4	CREBBP	99.9646	99.6224	25	2.22507	CLIP	Cluster16
5	SF3B2	99.9528	99.1503	20	3.00613	CLIP	Cluster26
6	EP300	99.941	99.6696	24	2.12122	CLIP	Cluster16
7	MTOR	99.9292	99.4336	14	2.72992	CLIP	Cluster29
8	PRPF8	99.9174	98.9379	18	4.00607	CLIP	Cluster26
9	DHX38	99.9056	99.0087	20	2.72933	CLIP	Cluster26
10	SNRNP200	99.8938	98.5721	18	3.78539	CLIP	Cluster26
11	FYN	99.882	99.8466	34	1.71394	CLIP	Cluster25
12	CTNNA1	99.8702	99.0323	14	2.47284	CLIP	Cluster38
13	AXIN1	99.8584	99.4926	16	1.92506		Cluster8
14	SF3B3	99.8466	98.2948	18	2.5484	CLIP	Cluster26
15	SF3B1	99.8348	98.9084	19	2.21878	CLIP	Cluster26
16	POLR2B	99.823	98.1237	18	2.59465	CLIP	Cluster26
17	ERBB2	99.8112	98.6783	11	2.7748	CLIP	Cluster5
18	KIFAP3	99.7994	97.9113	17	2.75705	CLIP	Cluster27
19	PPP2R1A	99.7876	99.7286	18	1.65843	CLIP	Cluster14
20	ATM	99.7758	99.646	17	1.68536	CLIP	Cluster4
21	ABL1	99.764	98.2181	16	2.41356	CLIP	Cluster20
22	DHX9	99.7522	97.8641	18	2.40981	CLIP	Cluster26
23	PRPF6	99.7404	98.4069	17	2.2247	CLIP	Cluster26
24	MCM2	99.7286	98.5367	10	2.51771	CLIP	Cluster35
25	HDAC3	99.7168	98.9969	22	1.84304	CLIP	Cluster27
26	NOTCH1	99.705	98.7609	9	2.346	CLIP	Cluster8
27	CCT7	99.6932	99.0559	6	2.85095	CLIP	Cluster36
28	SPTAN1	99.6814	97.7342	9	3.09596	CLIP	Cluster24
29	CDC5L	99.6696	99.3864	15	1.66366	CLIP	Cluster26
30	BRCA1	99.6578	99.5988	23	1.42915	CLIP	Cluster4
31	SRC	99.646	99.9528	45	1.19613		Cluster25
32	RB1	99.6342	99.5044	17	1.5057	CLIP	Cluster16
33	SIN3A	99.6165	98.4305	16	1.87824	CLIP	Cluster16
34	CKAP5	99.6165	95.7517	16	3.00583	CLIP	Cluster27
35	SPTBN1	99.5988	96.6427	9	3.20648	CLIP	Cluster24
36	NR3C1	99.587	98.0529	14	1.92008		Cluster34
37	KPNB1	99.5752	98.6193	15	1.73886	CLIP	Cluster18
38	TOPBP1	99.5634	98.5957	14	1.77188	CLIP	Cluster4
39	KDM1A	99.5516	99.5398	6	1.88435	CLIP	Cluster16
40	CCT4	99.5398	99.0736	6	2.22464	CLIP	Cluster36
41	PARP1	99.528	97.4392	12	2.10565	CLIP	Cluster16
42	NCOR1	99.5162	97.5572	17	1.90252	CLIP	Cluster27
43	CHAF1A	99.5044	98.9084	9	1.88736	CLIP	Cluster16
44	AP2M1	99.4926	99.1739	14	1.56731	CLIP	Cluster19
45	RXRA	99.4808	97.628	17	1.8498		Cluster31
46	CLASP1	99.469	98.0411	25	1.67778	CLIP	Cluster27
47	SMC3	99.4572	97.1855	9	2.29297	CLIP	Cluster13
48	SMARCA5	99.4454	98.6311	10	1.78154	CLIP	Cluster16
49	HSPA4	99.4336	99.3156	9	1.63552	CLIP	Cluster15
50	HDAC1	99.4218	99.8938	28	0.996199		Cluster16
51	BLM	99.41	97.6162	6	2.6299	CLIP	Cluster4
52	KIF5C	99.3982	97.5277	8	2.15832	CLIP	Cluster27
53	CLTC	99.3864	95.6219	8	3.0806	CLIP	Cluster19
54	HNRNPUL1	99.3746	97.1088	15	1.80044	CLIP	Cluster26
55	FANCD2	99.3628	99.41	7	1.59473	CLIP	Cluster4
56	KIF3B	99.351	98.3715	18	1.44776	CLIP	Cluster27
57	MCM4	99.3392	98.1827	9	1.77703	CLIP	Cluster35
58	MCM6	99.3274	96.2001	7	2.64345	CLIP	Cluster35
59	SMC1A	99.3156	99.4749	22	1.11637		Cluster26
60	NUP160	99.3038	95.0732	18	2.01602	CLIP	Cluster18
61	STRN4	99.292	97.2799	7	2.19749	CLIP	Cluster36
62	NUP133	99.2802	95.0732	18	2.00956	CLIP	Cluster18
63	PTPN11	99.2625	96.5424	15	1.78771	CLIP	Cluster25
64	BRCA2	99.2625	99.2211	9	1.46111	CLIP	Cluster4
65	PPP2R2C	99.2447	99.1621	11	1.37911		Cluster36
66	KIF23	99.2329	97.9526	10	1.70209	CLIP	Cluster27
67	KAT5	99.2211	99.3628	9	1.39588		Cluster16
68	KIFC3	99.2093	97.5985	9	1.81398		Cluster27
69	MCM3	99.1975	98.0647	9	1.71623		Cluster35
70	MED12	99.1857	93.2853	13	2.96341	CLIP	Cluster31
71	NFX1	99.1739	95.0378	14	2.04758	CLIP	Cluster26
72	POLA1	99.1621	99.2329	9	1.40711		Cluster4
73	MSH2	99.1503	97.0852	7	2.10458	CLIP	Cluster31
74	CCT6A	99.1385	98.9615	6	1.74302	CLIP	Cluster36
75	CHD4	99.1267	93.958	9	3.46143	CLIP	Cluster16
76	DDX23	99.1149	95.5157	15	1.86447		Cluster26
77	HDAC5	99.1031	96.7312	12	1.72317	CLIP	Cluster16
78	PLK1	99.0913	99.8112	34	0.859309		Cluster27
79	CPSF3	99.0795	94.9021	14	2.01325	CLIP	Cluster26
80	JUP	99.0677	98.3597	9	1.58334	CLIP	Cluster5
81	NUP107	99.0559	95.1499	18	1.79706	CLIP	Cluster18
82	AP2A1	99.0441	94.4005	12	2.17416	CLIP	Cluster19
83	HSP90AA1	99.0323	99.0205	15	1.21172	RNA	Cluster41
84	STAG2	99.0205	96.2945	5	2.57261	CLIP	Cluster13
85	KIF5A	99.0087	97.5277	8	1.76798	CLIP	Cluster27
86	TCP1	98.9969	98.6665	6	1.68284	CLIP	Cluster36
87	IQGAP1	98.9851	94.8312	8	2.37159	CLIP	Cluster24
88	CLASP2	98.9733	97.0498	20	1.4253	CLIP	Cluster27
89	MSH6	98.9615	95.262	5	3.24914	CLIP	Cluster4
90	POLE	98.9497	96.4185	6	2.16697	CLIP	Cluster4
91	PPP1CA	98.9379	96.5306	7	1.98627	CLIP	Cluster30
92	PIK3CA	98.9261	95.7753	10	1.82318	CLIP	Cluster25
93	RAC3	98.9143	99.3982	22	0.927884		Cluster38
94	IRS1	98.9025	98.7904	16	1.12933		Cluster21
95	HDAC6	98.8907	94.4772	7	2.50744	CLIP	Cluster16
96	SPTBN2	98.8789	94.0052	6	3.77771	CLIP	Cluster24
97	SPTB	98.8671	95.557	7	2.12213		Cluster42
98	SPTBN4	98.8553	95.8048	7	2.04747		Cluster42
99	CCT8	98.8435	98.9792	6	1.48913	CLIP	Cluster36
100	KIF2C	98.8317	98.2712	20	1.15235		Cluster27
101	STAT3	98.8199	98.1355	14	1.24463	CLIP	Cluster25
102	KIF15	98.8081	97.3684	8	1.625	CLIP	Cluster27
103	PKN1	98.7963	93.486	8	2.59446	CLIP	Cluster20
104	CUL1	98.7845	95.5865	8	1.93838	CLIP	Cluster8
105	TRRAP	98.7668	92.7071	8	3.25656	CLIP	Cluster16
106	KNTC1	98.7668	94.6542	16	1.72231	CLIP	Cluster27
107	FN1	98.7491	96.2237	9	1.70656	CLIP	Cluster24
108	BUB1	98.7373	94.4182	11	1.92619	CLIP	Cluster18
109	UPF1	98.7255	94.8844	7	2.23318	CLIP	Cluster14
110	SART1	98.7137	94.7604	7	2.23708	CLIP	Cluster26
111	GTF2F1	98.7019	97.2799	18	1.25888		Cluster26
112	KIF5B	98.6901	98.2417	13	1.20131	CLIP	Cluster27
113	MCM7	98.6724	98.8258	10	1.19524		Cluster35
114	AKT1	98.6724	99.9764	44	0.577577		Cluster28
115	CDC20	98.6547	95.9877	13	1.51707		Cluster32
116	PTK2	98.6429	98.1591	14	1.17992	CLIP	Cluster20
117	DYNC1H1	98.6311	89.515	12	4.0748	CLIP	Cluster27
118	CLSPN	98.6193	95.7045	6	2.03069	CLIP	Cluster35
119	JAK1	98.6075	91.35	10	2.88445	CLIP	Cluster25
120	BUB1B	98.5957	97.0734	15	1.28628		Cluster32
121	CDC16	98.5839	98.0175	15	1.15021		Cluster27
122	SNW1	98.5721	95.9287	13	1.46498		Cluster26
123	USP7	98.5603	94.0996	5	2.86256	CLIP	Cluster9
124	ANK1	98.5485	94.548	6	2.22482		Cluster24
125	INSR	98.5367	95.1735	8	1.81724	CLIP	Cluster17
126	KIF11	98.5249	98.2712	10	1.20922	CLIP	Cluster27
127	PRPF19	98.5131	98.7019	17	0.962412		Cluster26
128	SOS1	98.5013	98.2535	17	1.02168	CLIP	Cluster25
129	DNMT1	98.4895	93.7279	7	2.26274	CLIP	Cluster16
130	STAT1	98.4777	94.7132	11	1.64813	CLIP	Cluster25
131	SMC1B	98.4659	95.1027	6	1.96208
132	ERCC6L	98.4541	91.7453	12	2.13965
133	KIF3C	98.4423	93.5332	9	1.97014	CLIP&RNA	Cluster27
134	CUL3	98.4305	94.725	12	1.57878	CLIP	Cluster27
135	ZW10	98.4187	94.9847	17	1.42734		Cluster27
136	MCM5	98.4069	96.6132	8	1.49855		Cluster35
137	CENPF	98.3951	90.4472	9	2.94436	CLIP	Cluster27
138	TOP2B	98.3833	89.4796	10	3.02278	CLIP	Cluster16
139	RUVBL2	98.3715	99.1149	14	0.894097		Cluster16
140	XAB2	98.3597	90.6538	8	3.14391	CLIP	Cluster26
141	EIF3B	98.3479	92.9667	5	3.11514	CLIP	Cluster22
142	SF3A1	98.3361	98.4423	19	0.918999		Cluster26
143	BAZ1B	98.3243	91.6509	9	2.36446	CLIP	Cluster16
144	ZNF217	98.3125	93.427	8	2.03747	CLIP	Cluster16
145	MDC1	98.3007	94.7014	8	1.7683	CLIP	Cluster4
146	HCFC1	98.2889	90.7954	8	2.84415	CLIP	Cluster16
147	MED26	98.2771	91.409	12	2.02597
148	CDH2	98.2653	99.3746	15	0.773746	CLIP	Cluster20
149	RPA1	98.2535	96.0349	7	1.59055	CLIP	Cluster4
150	JAK2	98.2417	96.743	14	1.1673		Cluster25
151	CDC40	98.2299	97.8995	18	0.954958		Cluster26
152	IGF1R	98.2181	95.1263	7	1.72209	CLIP	Cluster5
153	NCBP1	98.2063	99.7522	25	0.556633		Cluster26
154	EIF4G2	98.1945	96.8138	4	1.808	CLIP	Cluster22
155	NCOA1	98.1827	95.8343	12	1.30475		Cluster31
156	AP2A2	98.165	94.1704	11	1.6009	CLIP	Cluster19
157	TPR	98.165	88.9663	12	2.37246	CLIP	Cluster18
158	HIF1A	98.1473	95.3859	9	1.48978	CLIP	Cluster34
159	DDB1	98.1355	91.9106	5	3.12678	CLIP	Cluster33
160	KIT	98.1237	93.0257	10	1.80784		Cluster25
161	TERF2	98.1119	98.4659	9	1.04231		Cluster33
162	TUBG1	98.1001	91.9637	12	1.81867
163	HNRNPM	98.0883	96.9613	16	1.05296		Cluster26
164	RELA	98.0765	97.5454	11	1.08879		Cluster7
165	SEC24C	98.0647	88.152	14	2.3977	CLIP	Cluster19
166	PLK2	98.047	97.2386	4	1.67902	RNA	Cluster32
167	SEC24D	98.047	88.2346	14	2.36605	CLIP	Cluster19
168	NOC2L	98.0293	98.3479	5	1.32459		Cluster37
169	PRL	98.0175	92.6835	7	2.12591
170	MYC	98.0057	99.0913	11	0.846505		Cluster34
171	ASH2L	97.9939	98.7255	6	1.1557		Cluster16
172	SNRNP70	97.9821	97.3979	15	0.976885		Cluster26
173	RAD21	97.9703	96.7194	7	1.36344	CLIP	Cluster13
174	PPP4C	97.9585	98.5131	8	1.03018		Cluster36
175	SMARCD3	97.9467	93.8164	11	1.53424		Cluster16
176	GSN	97.9349	95.3741	4	1.91819	CLIP	Cluster20
177	VPS18	97.9231	97.4746	2	2.72255	CLIP	Cluster9
178	JUN	97.9113	98.8494	11	0.843926		Cluster8
179	SF3A2	97.8995	99.8702	30	0.375855		Cluster30
180	NAT10	97.8877	96.3122	4	1.71437		Cluster37
181	PKP2	97.8759	97.1265	2	2.86995		Cluster42
182	MBD3	97.8641	93.3679	8	1.75095
183	PPP2R2A	97.8523	99.6932	15	0.525791		Cluster14
184	RUVBL1	97.8405	98.9792	12	0.785734		Cluster16
185	U2AF2	97.8287	98.8671	17	0.716961		Cluster26
186	SIRT1	97.8169	97.2563	10	1.04918		Cluster16
187	CCT5	97.8051	94.5303	6	1.69319	CLIP&RNA	Cluster36
188	MET	97.7933	93.9049	7	1.72364		Cluster42
189	MTA2	97.7814	94.1468	8	1.59043	CLIP	Cluster16
190	XRCC6	97.7696	93.6158	6	1.81736	CLIP	Cluster4
191	PTK2B	97.7578	94.0288	10	1.44334		Cluster25
192	ERBB4	97.746	91.4385	7	2.09953		Cluster5
193	AURKA	97.7342	98.6429	18	0.696193		Cluster27
194	CEP164	97.7224	93.545	13	1.3782		Cluster32
195	CSTF1	97.7106	96.0113	16	1.01174		Cluster26
196	COPB1	97.6988	87.0309	9	3.03748	CLIP	Cluster19
197	ANK2	97.687	91.6686	4	3.00962	CLIP	Cluster24
198	CPSF2	97.6693	97.038	16	0.873589		Cluster26
199	AR	97.6693	99.5752	17	0.449641		Cluster34
200	SF3B4	97.6516	98.1119	18	0.728164		Cluster26
201	MLH1	97.6398	95.852	5	1.46425		Cluster35
202	TRIM28	97.628	90.9134	5	2.36926	CLIP	Cluster16
203	SPHK1	97.6162	97.3271	8	1.03875		Cluster36
204	FMR1	97.6044	99.2802	6	0.867895	RNA	Cluster26
205	CLP1	97.5926	95.3033	15	1.04866		Cluster26
206	SSRP1	97.5808	92.0463	8	1.74854	CLIP	Cluster26
207	SMARCA2	97.569	96.8964	10	0.992158		Cluster16
208	KIF4A	97.5572	86.2934	9	2.86931	CLIP	Cluster27
209	TUBGCP2	97.5454	90.4768	10	1.77827
210	KLC2	97.5336	97.8169	10	0.865017		Cluster27
211	HNRNPU	97.5218	97.156	16	0.819305	CLIP	Cluster26
212	CHD3	97.51	86.1223	8	3.52383	CLIP&RNA	Cluster16
213	MED24	97.4982	91.2084	11	1.61509	CLIP	Cluster31
214	IRS2	97.4864	90.0519	9	1.86013	CLIP	Cluster25
215	STUB1	97.4746	93.7692	4	1.94301		Cluster44
216	BTRC	97.4628	96.6014	8	1.0718		Cluster8
217	HNRNPL	97.451	94.9611	14	1.05477	CLIP	Cluster26
218	KIF18A	97.4392	95.0555	17	0.994356		Cluster27
219	DKC1	97.4274	98.4187	6	0.952293		Cluster37
220	CARM1	97.4156	96.6722	7	1.11869		Cluster34
221	CTTN	97.4038	99.4218	15	0.462193		Cluster20
222	NCOR2	97.392	88.6004	6	2.3855	CLIP	Cluster31
223	CHD8	97.3802	87.1135	6	3.29861	CLIP	Cluster16
224	RBBP7	97.3684	97.8051	13	0.744315		Cluster34
225	MAP3K5	97.3566	91.5388	4	2.32585		Cluster44
226	EIF4G3	97.3448	94.3651	3	2.08399	CLIP	Cluster22
227	PLCG1	97.333	88.3054	7	2.22019	CLIP	Cluster25
228	HDAC4	97.3212	96.3477	12	0.886257		Cluster34
229	NOC3L	97.3094	95.9523	4	1.45029		Cluster37
230	PRKCZ	97.2976	91.232	5	2.02277		Cluster42
231	KLHL21	97.2858	90.1345	11	1.62087		Cluster27
232	CTNNA2	97.274	90.4177	5	2.17283	CLIP	Cluster38
233	CDK5	97.2622	99.764	19	0.244427		Cluster24
234	RBM22	97.2504	88.9426	8	1.93247	CLIP	Cluster26
235	PRKD1	97.2386	96.6427	5	1.19858		Cluster20
236	SKIV2L	97.2268	90.465	5	2.08355		Cluster1
237	TP53	97.215	99.9646	51	0.0674324		Cluster16
238	NCOA2	97.2032	90.6774	12	1.4713	CLIP&RNA	Cluster31
239	TBK1	97.1914	95.9405	3	1.67358		Cluster41
240	RASA1	97.1796	96.9436	8	0.937889		Cluster25
241	KIF3A	97.1678	98.1473	19	0.56359		Cluster27
242	PELP1	97.156	91.881	9	1.44516
243	MED13L	97.1442	87.1607	8	2.18694	CLIP	Cluster31
244	CTNND1	97.1324	89.6625	7	1.85589	CLIP	Cluster20
245	FXR1	97.1206	99.4454	3	1.00989	CLIP	Cluster27
246	CCT2	97.1029	99.3038	7	0.652847		Cluster36
247	EGFR	97.1029	99.7758	27	0.162645		Cluster5
248	DAXX	97.0852	89.8395	4	2.41344	CLIP	Cluster16
249	SMARCC1	97.0734	89.0017	10	1.66851	CLIP	Cluster16
250	PRRC2A	97.0616	95.2915	2	2.3518	CLIP	Cluster21
251	FLNA	97.0498	87.8098	4	3.87711	CLIP	Cluster25
252	PLXNB1	97.038	94.2412	5	1.43723	CLIP	Cluster38
253	ANAPC1	97.0262	89.1315	4	2.4984	CLIP	Cluster32
254	CRNKL1	97.0144	98.6075	12	0.553862		Cluster26
255	RFC4	97.0026	98.3951	10	0.636301		Cluster4
256	PCF11	96.9908	95.4803	15	0.843629		Cluster26
257	AKAP9	96.979	86.016	9	2.20707	CLIP	Cluster27
258	REV3L	96.9672	95.1617	5	1.27739	CLIP	Cluster4
259	NCOA3	96.9554	92.4121	10	1.28686	CLIP	Cluster31
260	SMARCC2	96.9436	87.9337	9	1.80994	CLIP	Cluster16
261	APAF1	96.9318	95.7635	3	1.59641	CLIP	Cluster41
262	ORC3	96.92	96.2119	5	1.1364		Cluster35
263	PTPRA	96.9082	94.9257	6	1.21744		Cluster42
264	GTF3C1	96.8964	84.1751	8	3.21903	CLIP	Cluster26
265	NUP188	96.8846	83.3786	10	2.99359	CLIP	Cluster18
266	HGS	96.8728	90.7718	6	1.7346
267	NUP205	96.8551	83.3786	10	2.89426	CLIP	Cluster18
268	KAT2B	96.8551	98.6901	18	0.414719		Cluster16
269	PCNT	96.8374	84.6	8	2.75855	CLIP	Cluster27
270	PLRG1	96.8256	91.7984	9	1.35521		Cluster26
271	PAXIP1	96.8079	97.3507	3	1.31449		Cluster34
272	HNRNPF	96.8079	96.2827	16	0.697888		Cluster26
273	CCNB1	96.7902	95.4803	6	1.11776	RNA	Cluster32
274	STK11	96.7784	90.6184	6	1.72183
275	MED13	96.7666	90.937	11	1.34114	CLIP	Cluster31
276	GSPT2	96.7548	87.7862	5	2.29162		Cluster14
277	DVL1	96.743	91.2438	5	1.74279
278	RAD17	96.7312	95.0378	8	1.02337
279	PAK1	96.7194	96.4834	7	0.927635		Cluster20
280	HDAC11	96.7076	92.9785	8	1.27543
281	ERCC3	96.6958	91.7748	9	1.34782
282	CCAR1	96.684	96.8138	17	0.617833		Cluster26
283	SNRPG	96.6722	98.8907	19	0.359711	RNA	Cluster26
284	RARA	96.6604	95.4272	11	0.858954		Cluster31
285	BCAR1	96.6486	89.4619	5	1.92927	CLIP	Cluster25
286	CAPN6	96.6368	87.5974	10	1.71318
287	PARP4	96.625	87.0132	9	1.85202	CLIP	Cluster27
288	CLIP1	96.6132	92.3413	13	1.11497		Cluster32
289	CENPL	96.6014	87.6623	10	1.68139
290	ARID1A	96.5896	86.1636	7	2.1949	CLIP	Cluster16
291	CEBPZ	96.5778	94.3651	2	2.3467	CLIP	Cluster37
292	UPF2	96.566	92.7543	6	1.38846		Cluster14
293	PXN	96.5542	97.8523	13	0.528935		Cluster25
294	SF3A3	96.5424	97.2032	17	0.539423		Cluster26
295	SMARCB1	96.5306	92.7425	11	1.10533		Cluster16
296	APC2	96.5188	83.6795	7	4.04482	CLIP&RNA	Cluster24
297	PDCD11	96.507	92.7779	2	3.13599	CLIP	Cluster37
298	CTDP1	96.4952	90.8898	7	1.48381
299	CDK4	96.4834	97.1678	8	0.744101	RNA	Cluster35
300	MAP1B	96.4716	88.7066	3	2.97796	CLIP	Cluster17
301	BRCC3	96.4598	92.0994	5	1.50955
302	HRAS	96.448	96.1411	6	0.937595		Cluster36
303	SMARCD1	96.4362	88.093	9	1.60037	CLIP	Cluster16
304	MFAP1	96.4244	97.6516	14	0.512655		Cluster26
305	EIF3A	96.4126	89.8749	3	2.46673	CLIP	Cluster22
306	MED14	96.4008	91.3854	11	1.19364	CLIP	Cluster31
307	RRP12	96.389	92.536	2	3.07419	CLIP	Cluster37
308	HSPA8	96.3772	92.2941	4	1.63135	CLIP&RNA	Cluster30
309	PLXNA4	96.3654	85.5381	5	2.59768	CLIP	Cluster24
310	STRN	96.3536	98.3302	8	0.575871		Cluster36
311	HNRNPK	96.3418	98.5249	19	0.294966		Cluster26
312	COPA	96.3299	82.2398	9	2.8156	CLIP	Cluster19
313	NCL	96.3182	96.1175	2	1.71965		Cluster8
314	PTBP1	96.3063	96.4362	16	0.563108		Cluster26
315	CENPE	96.2945	86.199	9	1.7707	CLIP	Cluster18
316	NOTCH2	96.2827	86.4881	4	2.62904	CLIP	Cluster16
317	SEC13	96.2709	95.4449	17	0.631217		Cluster18
318	FUS	96.2591	94.7722	14	0.750979	CLIP	Cluster26
319	EIF6	96.2414	93.9698	2	2.209		Cluster37
320	DST	96.2414	92.8546	2	2.57527	CLIP	Cluster27
321	TADA3	96.2237	86.2403	6	2.04474	CLIP	Cluster16
322	PIK3CB	96.2119	87.2551	6	1.86481	CLIP	Cluster25
323	NOP58	96.2001	99.6342	12	0.105278		Cluster37
324	PSMC5	96.1883	94.6896	5	1.10218
325	NUP153	96.1765	87.9514	13	1.32715	CLIP	Cluster18
326	MED1	96.1647	86.2226	5	2.17287	CLIP	Cluster31
327	NUP155	96.1529	83.2724	10	2.12557	CLIP	Cluster18
328	IRS4	96.1411	88.4352	3	2.49604
329	SEC31A	96.1293	87.2079	11	1.45901	CLIP	Cluster19
330	GRIP1	96.1175	89.4383	4	1.81796	CLIP	Cluster31
331	TSC2	96.1057	88.683	3	2.36948	CLIP	Cluster17
332	UPF3B	96.0939	98.5485	20	0.22089		Cluster26
333	PSMD3	96.0821	92.477	5	1.33251
334	CTBP1	96.0703	97.746	13	0.4105		Cluster34
335	RIPK1	96.0585	93.2499	4	1.38189
336	NFKB1	96.0467	85.6738	6	2.05042
337	NUP214	96.0349	85.78	10	1.67243	CLIP	Cluster18
338	RFC1	96.0172	91.5152	4	1.58414	CLIP	Cluster4
339	GIT1	96.0172	85.662	5	2.23035	CLIP	Cluster25
340	ILF3	95.9995	94.9257	5	1.01917		Cluster10
341	EPHA2	95.9877	90.7836	8	1.24652		Cluster42
342	SH3KBP1	95.9759	91.2202	8	1.20816		Cluster42
343	DLL1	95.9641	96.448	4	0.951279		Cluster3
344	MED23	95.9523	91.763	12	0.98368
345	VCL	95.9405	87.4439	5	1.85062	CLIP	Cluster12
346	BARD1	95.9287	96.6604	10	0.571168		Cluster32
347	RPL3	95.9169	89.1905	7	1.42039
348	SUGP1	95.9051	97.1855	17	0.374116		Cluster26
349	JAK3	95.8933	85.9806	9	1.64431		Cluster42
350	NOTCH3	95.8815	86.2226	4	2.28572	CLIP	Cluster16
351	PLXNA2	95.8697	85.5381	5	2.15072	CLIP	Cluster24
352	SMG6	95.8579	85.1192	4	2.63689	CLIP	Cluster14
353	DCTN1	95.8461	86.5825	3	3.09029	CLIP	Cluster7
354	RANGAP1	95.8343	96.3122	14	0.489567		Cluster18
355	FANCI	95.8225	90.6302	3	1.89372	CLIP	Cluster4
356	ANAPC2	95.8107	90.1994	4	1.63658
357	PSMD2	95.7989	86.3111	3	3.14157	CLIP	Cluster9
358	SYK	95.7871	93.5745	12	0.783099		Cluster25
359	PPFIA1	95.7753	88.034	6	1.57022	CLIP	Cluster17
360	VPS16	95.7635	90.8544	3	1.8344
361	DNM2	95.7517	89.1433	4	1.71358		Cluster20
362	PARD3	95.7399	87.2197	4	2.00383	CLIP	Cluster28
363	PIK3CD	95.7281	86.8893	5	1.83286
364	TUBGCP3	95.7163	94.0524	17	0.643185		Cluster27
365	PML	95.7045	91.9932	8	1.04556
366	PRPF4	95.6927	96.507	15	0.418921		Cluster26
367	PPP2CB	95.6809	99.2093	12	0.13323		Cluster36
368	TLN1	95.6691	82.4286	5	3.22423	CLIP	Cluster12
369	PALB2	95.6573	86.8657	4	2.0359	CLIP	Cluster4
370	NDC80	95.6455	91.0668	10	1.02527		Cluster18
371	YY1	95.6337	98.0293	11	0.321729		Cluster34
372	COPG1	95.6219	81.3606	10	2.23944	CLIP	Cluster19
373	COPS5	95.6101	94.8135	7	0.827725		Cluster22
374	FEN1	95.5983	96.4657	4	0.874691		Cluster35
375	SUPV3L1	95.5865	90.3764	3	1.83299		Cluster1
376	PPP1CC	95.5747	97.1442	16	0.318537		Cluster18
377	NFKBIA	95.5629	92.5183	8	0.987283
378	CDK5RAP2	95.5511	82.2044	7	2.41157	CLIP	Cluster27
379	ATR	95.5393	88.3762	3	2.05282	CLIP	Cluster4
380	ORC1	95.5275	87.5502	3	2.27787	CLIP	Cluster35
381	SEC24A	95.5157	88.27	15	1.07611		Cluster19
382	GTF2B	95.5039	83.4199	4	3.56446
383	DDX5	95.4921	91.0491	4	1.44711	CLIP	Cluster30
384	BBS10	95.4803	93.9226	4	1.13335
385	YES1	95.4685	97.4569	15	0.256714		Cluster25
386	ERCC2	95.4567	89.8277	8	1.14153
387	SNRPD2	95.4449	98.9497	18	0.0276716	RNA	Cluster26
388	CBL	95.4331	95.9169	13	0.415421		Cluster25
389	MYO1C	95.4213	91.0786	5	1.23951		Cluster42
390	ACTL6B	95.4095	86.7123	8	1.41556		Cluster16
391	H2AFX	95.3977	97.687	11	0.279144		Cluster34
392	IRF2BPL	95.3859	94.6188	2	1.55916		Cluster32
393	TAF1	95.3741	84.8596	5	1.91106	CLIP	Cluster16
394	PPP2R3A	95.3623	87.4675	5	1.55546	CLIP	Cluster36
395	EXOSC4	95.3505	91.3028	3	1.58122
396	MARS	95.3387	82.995	5	2.2992	CLIP	Cluster21
397	DNA2	95.3269	96.7902	3	0.912538		Cluster4
398	MAD1L1	95.3151	88.2818	10	1.10349		Cluster18
399	CSNK1D	95.3033	94.4536	18	0.466968		Cluster27
400	GATAD2A	95.2915	93.0493	8	0.837482
401	AP2S1	95.2797	95.3269	12	0.450702		Cluster19
402	RAD51	95.2679	98.6547	9	0.186793		Cluster4
403	VIM	95.2561	96.9613	8	0.439862		Cluster24
404	TEX10	95.2443	92.1879	7	0.950533		Cluster37
405	DDX27	95.2325	96.8138	4	0.727993		Cluster37
406	RAE1	95.2207	87.5738	14	1.04751		Cluster18
407	ACTN1	95.2089	84.4111	5	1.93331	CLIP	Cluster24
408	CNTN1	95.1971	90.8072	4	1.33444		Cluster42
409	MED15	95.1853	91.9755	11	0.786915		Cluster31
410	CEP131	95.1735	85.6207	9	1.40748
411	PTPN6	95.1617	82.11	6	2.2447
412	CD2BP2	95.1499	96.389	16	0.272413		Cluster26
413	EIF4B	95.1381	98.1709	6	0.393903		Cluster22
414	RBBP5	95.1263	93.0965	9	0.771625		Cluster16
415	MYO6	95.1145	95.6337	7	0.606894		Cluster24
416	SMG5	95.1027	86.5353	4	1.78586	CLIP	Cluster14
417	NUP88	95.0909	84.659	12	1.37395		Cluster18
418	CORO1A	95.0791	90.2171	5	1.23396		Cluster24
419	CDON	95.0673	96.5896	8	0.442866		Cluster38
420	PCNA	95.0555	99.8584	24	-0.271	RNA	Cluster4
421	NUP93	95.0437	83.7385	10	1.56221	CLIP	Cluster18
422	DDX54	95.0319	88.919	2	2.39359	CLIP	Cluster37
423	LCK	95.0201	98.8258	19	0		Cluster25
424	VPS39	95.0083	93.9934	2	1.58972	CLIP	Cluster9
425	TOP3A	94.9965	90.1463	3	1.60561	CLIP	Cluster4
426	CDC23	94.9847	90.5004	4	1.31398
427	TYRO3	94.9729	88.211	2	2.57336	CLIP	Cluster39
428	DPYSL3	94.9611	92.8723	7	0.854764	CLIP	Cluster24
429	RNGTT	94.9493	87.562	5	1.44066
430	SREBF2	94.9375	84.8006	6	1.68462	CLIP	Cluster19
431	CDC6	94.9257	97.9349	7	0.334905		Cluster35
432	FXR2	94.9139	94.843	1	3.0705	CLIP	Cluster41
433	TNKS1BP1	94.9021	88.565	2	2.38881	CLIP	Cluster23
434	GTF3C3	94.8903	80.2573	7	2.37978	CLIP	Cluster26
435	TP53BP1	94.8785	83.5615	4	2.25968	CLIP	Cluster32
436	EFNB1	94.8667	98.3125	8	0.218368		Cluster25
437	THBS2	94.8548	89.8749	2	2.13084
438	MTA1	94.843	89.2613	6	1.15993
439	PCBP1	94.8312	96.1529	15	0.251901		Cluster26
440	KCNQ2	94.8194	87.7272	5	1.39592		Cluster42
441	POLR3A	94.8076	80.3281	6	2.54949	CLIP	Cluster26
442	UBE3A	94.7958	87.9042	4	1.50664	CLIP	Cluster31
443	SEC24B	94.784	83.9391	7	1.68316	CLIP	Cluster19
444	CEP76	94.7722	82.9065	8	1.70736
445	TUBGCP6	94.7604	84.3934	9	1.43307
446	MED16	94.7486	90.8308	11	0.792966
447	FANCA	94.7368	97.3271	7	0.360928		Cluster45
448	SENP3	94.725	85.7446	5	1.58602
449	ARHGEF11	94.7132	94.2766	4	0.888934		Cluster39
450	KIF2A	94.7014	87.6623	10	1.03506		Cluster18
451	SSNA1	94.6896	86.7949	9	1.16642		Cluster32
452	SHC1	94.6778	96.979	13	0.169127		Cluster25
453	NUP98	94.666	81.9861	8	1.80355	CLIP	Cluster18
454	CSNK2A1	94.6542	98.3302	10	0.106732		Cluster34
455	EXOSC9	94.6424	95.0201	4	0.798226		Cluster10
456	HDAC9	94.6306	99.2625	16	-0.0668366		Cluster34
457	TAF6L	94.6188	93.2145	11	0.593246
458	GTF2H3	94.607	89.6094	8	0.95112
459	FANCC	94.5952	98.1001	7	0.247825		Cluster45
460	EXOSC10	94.5834	88.1638	3	1.69265	CLIP	Cluster10
461	FANCE	94.5716	94.5303	4	0.840495
462	PRC1	94.5598	95.852	13	0.271187		Cluster27
463	TNKS	94.548	87.2433	3	1.81123	CLIP&RNA	Cluster23
464	SRRM1	94.5362	96.2473	16	0.17405		Cluster26
465	CDC45	94.5244	96.3654	6	0.472635		Cluster35
466	HTT	94.5126	83.4435	3	2.75062	CLIP	Cluster28
467	RNPS1	94.5008	98.7137	20	-0.0427169		Cluster26
468	DDX24	94.489	86.5235	2	2.90166	CLIP	Cluster37
469	NEK2	94.4772	93.4506	11	0.54436		Cluster32
470	FBXO18	94.4595	85.6443	3	2.05258	CLIP	Cluster8
471	POLR3B	94.4595	79.4548	6	2.47444	CLIP	Cluster26
472	TJP1	94.4418	88.5178	2	2.1594	CLIP	Cluster20
473	ING2	94.43	93.0611	8	0.691189		Cluster34
474	PHF12	94.4182	92.2587	8	0.756376
475	EIF3D	94.4064	88.6535	3	1.57317		Cluster22
476	GTPBP4	94.3946	93.4742	2	1.46679		Cluster37
477	SFI1	94.3828	84.6413	9	1.32956
478	AAAS	94.3651	83.9863	11	1.30071		Cluster18
479	AP1B1	94.3651	80.9358	5	2.26272	CLIP	Cluster19
480	PSMC3	94.3474	88.6712	4	1.29901	RNA	Cluster9
481	COPB2	94.3356	80.2927	9	1.85726	CLIP	Cluster19
482	MAPK14	94.3238	97.3802	9	0.181323		Cluster38
483	XRN1	94.312	94.9493	3	0.917345		Cluster10
484	ACTL6A	94.3002	97.4156	14	0.0593557		Cluster16
485	MYO3A	94.2884	87.2315	4	1.45558		Cluster42
486	SRSF4	94.2766	98.2948	18	-0.00343992		Cluster26
487	EPHB2	94.2648	87.8924	3	1.65084	CLIP&RNA	Cluster25
488	CEP192	94.253	81.5435	7	1.83739	CLIP	Cluster27
489	BCR	94.2412	80.0684	4	3.40957	CLIP	Cluster3
490	BYSL	94.2294	97.9231	4	0.438302		Cluster37
491	LZTS1	94.2176	77.6139	6	3.15579	CLIP	Cluster26
492	RBBP8	94.2058	88.2228	6	1.11362
493	HNRNPR	94.194	96.2591	16	0.122592		Cluster26
494	AMOT	94.1822	87.3259	4	1.42771		Cluster42
495	EZR	94.1704	96.7076	7	0.32911		Cluster24
496	EIF4A2	94.1586	94.2176	3	0.989707	CLIP	Cluster22
497	CWC22	94.1468	86.9365	7	1.17453
498	CDK5R1	94.135	93.4388	8	0.59962		Cluster42
499	PLXNA3	94.1232	87.0781	6	1.22011		Cluster42
500	AP1G1	94.1114	82.8062	6	1.70747	CLIP	Cluster19
501	LRP2	94.0996	88.8482	2	1.9457	CLIP	Cluster28
502	MYO9B	94.0878	83.8093	3	2.3482	CLIP	Cluster24
503	EIF4A3	94.076	93.9816	7	0.601297		Cluster14
504	VCP	94.0642	83.6028	3	2.36778	CLIP	Cluster6
505	KAT6B	94.0524	80.7411	5	2.15579	CLIP	Cluster16
506	PES1	94.0406	94.5008	3	0.927729		Cluster37
507	KDR	94.0288	87.739	7	1.07971		Cluster42
508	PPP4R1	94.017	83.7739	3	2.32283	CLIP	Cluster36
509	EIF3F	94.0052	99.941	9	-0.284096		Cluster22
510	NOP14	93.9934	87.1017	3	1.69599
511	EGF	93.9757	96.8728	13	0.0940094		Cluster5
512	ITSN1	93.9757	94.1291	4	0.805982		Cluster42
513	INCENP	93.958	93.2971	11	0.488108		Cluster32
514	SMAD4	93.9462	96.5542	8	0.265571		Cluster34
515	SCYL1	93.9285	82.0392	11	1.4331		Cluster19
516	DCTN2	93.9285	90.2879	11	0.698891		Cluster32
517	PKP4	93.9108	93.7279	2	1.36267	CLIP	Cluster27
518	RBM5	93.899	97.097	16	0.011551		Cluster26
519	PPP2CA	93.8872	99.0441	15	-0.125076		Cluster36
520	ESPN	93.8754	86.3583	4	1.45605		Cluster42
521	MCRS1	93.8636	88.5414	8	0.896799
522	PTPN1	93.8518	94.4418	11	0.341503		Cluster42
523	DLG1	93.84	94.5716	5	0.603979		Cluster3
524	LRP5	93.8282	78.7586	4	3.26828	CLIP	Cluster20
525	RIMS1	93.8164	95.4272	4	0.621637		Cluster6
526	AFTPH	93.8046	85.2549	12	1.02022		Cluster19
527	JAG1	93.7928	91.8338	3	1.16235	CLIP	Cluster3
528	SH3GL2	93.781	92.6127	6	0.737208		Cluster19
529	UTP20	93.7692	85.4142	2	2.73667	CLIP	Cluster37
530	PRKAR2B	93.7574	95.2797	11	0.235983		Cluster8
531	CENPJ	93.7456	84.299	9	1.23575
532	RBBP4	93.7338	99.7168	19	-0.41648		Cluster16
533	TIAM1	93.722	89.0607	2	1.8119	CLIP	Cluster25
534	DMAP1	93.7102	87.5148	6	1.10425
535	PPARG	93.6984	96.684	11	0.100962		Cluster31
536	PSMD4	93.6866	91.8692	3	1.13605		Cluster9
537	CD44	93.6748	97.0144	9	0.132191		Cluster24
538	ANAPC5	93.6571	87.4557	3	1.55136	CLIP	Cluster32
539	PSMD6	93.6571	89.7038	4	1.09552		Cluster9
540	USF1	93.6394	92.89	7	0.631566
541	GPKOW	93.6276	89.8749	7	0.845504
542	SNRPA1	93.6158	98.3833	19	-0.122817		Cluster26
543	SEC23A	93.604	84.0099	7	1.37403	CLIP	Cluster19
544	LIG4	93.5922	87.0132	4	1.33592		Cluster45
545	PRPF31	93.5804	95.1971	10	0.242153		Cluster26
546	WDR12	93.5686	96.1647	3	0.682485		Cluster37
547	NINL	93.5568	83.4612	8	1.33642
548	U2AF1	93.545	97.0616	16	0		Cluster26
549	CNTRL	93.5332	82.9065	8	1.3925
550	CAP1	93.5214	87.1253	5	1.17683		Cluster1
551	CPSF7	93.5096	95.8933	15	0.075906		Cluster26
552	PAFAH1B1	93.4978	98.0765	26	-0.130951		Cluster27
553	USP4	93.486	82.7	3	2.25392	CLIP	Cluster26
554	MAPK12	93.4742	93.7574	6	0.579689		Cluster38
555	TP73	93.4624	83.2134	6	1.48229
556	PLK4	93.4506	85.898	9	1.00541
557	DDX20	93.4329	93.604	3	0.913107
558	RBM10	93.4329	82.3578	3	2.30765	CLIP	Cluster26
559	EP400	93.4152	81.7206	3	2.53664	CLIP	Cluster16
560	PTPN12	93.4034	84.2223	5	1.43825
561	ITGB5	93.3916	85.131	4	1.45685		Cluster1
562	SETDB1	93.3798	83.9155	3	1.93916	CLIP	Cluster16
563	ACTB	93.3679	92.7189	8	0.535015		Cluster34
564	POLR2E	93.3561	99.351	26	-0.365399		Cluster26
565	DICER1	93.3443	93.5922	1	2.22711	CLIP	Cluster41
566	NCK1	93.3325	95.2207	10	0.175778		Cluster25
567	VPS41	93.3148	89.0843	2	1.66882	CLIP	Cluster9
568	ZBTB16	93.3148	81.4491	4	1.95544	CLIP	Cluster4
569	EEF2	93.2971	84.0807	3	1.87969	CLIP	Cluster29
570	NTN1	93.2853	86.0397	6	1.12054
571	SART3	93.2735	89.7746	2	1.58675	CLIP	Cluster26
572	TNC	93.2617	88.8187	2	1.67111
573	SUV39H1	93.2499	92.2705	5	0.70041		Cluster16
574	LRPPRC	93.2381	92.5065	1	2.52339	CLIP	Cluster14
575	SREBF1	93.2263	78.8412	6	1.91472	CLIP	Cluster31
576	STAU1	93.2145	92.7307	4	0.782534		Cluster43
577	PPP1R12A	93.2027	93.9049	5	0.566507
578	CSTF2	93.1909	95.7399	15	0.0275109		Cluster26
579	DDX18	93.1791	96.566	4	0.387416		Cluster37
580	KAT6A	93.1673	77.0828	5	2.49592	CLIP	Cluster16
581	TAF6	93.1555	90.0991	9	0.620512
582	PSMD1	93.1437	83.6028	2	3.00245	CLIP	Cluster9
583	CUL7	93.1319	79.9268	3	3.02857	CLIP	Cluster8
584	SMARCAL1	93.1201	81.0007	3	2.44647	CLIP	Cluster4
585	CDT1	93.1083	94.6011	5	0.461409
586	UBTF	93.0965	80.5051	4	2.02597	CLIP	Cluster33
587	NRCAM	93.0847	92.4003	5	0.669553		Cluster42
588	KEAP1	93.0729	81.4963	4	1.87032		Cluster1
589	NCK2	93.0611	94.9257	8	0.258879		Cluster42
590	PTPRJ	93.0493	85.9924	7	1.01767		Cluster13
591	CCNE1	93.0375	86.0042	3	1.52267		Cluster35
592	DBF4	93.0257	94.3238	5	0.493257
593	BRPF1	93.0139	77.8027	4	2.67667	CLIP	Cluster16
594	MAPK1	93.0021	99.5162	15	-0.429714		Cluster39
595	TGS1	92.9903	83.8919	4	1.53516
596	ILK	92.9785	91.1612	7	0.633463		Cluster42
597	FANCB	92.9667	92.9903	3	0.885495
598	PPP1R12C	92.9549	98.2299	3	0.343654		Cluster35
599	NCOA6	92.9431	89.102	5	0.860486		Cluster34
600	RPTOR	92.9313	83.1839	3	1.8767	CLIP	Cluster29
601	NELFB	92.9195	81.6025	4	1.80661
602	CHEK1	92.9077	97.2563	11	-0.0218601		Cluster4
603	ILF2	92.8959	93.84	7	0.393321	RNA	Cluster4
604	CDK2	92.8841	99.882	19	-0.680326		Cluster35
605	MSH3	92.8723	86.7654	2	1.83584	CLIP	Cluster4
606	SMG8	92.8605	84.3403	2	2.32798		Cluster14
607	DIS3L	92.8487	83.7031	2	2.56787	CLIP	Cluster10
608	PHF20	92.8369	78.6464	4	2.21363	CLIP	Cluster16
609	PALLD	92.8251	89.8749	5	0.805897		Cluster42
610	BAZ1A	92.8133	82.1218	3	2.01327	CLIP	Cluster16
611	FANCM	92.8015	93.3561	3	0.815634
612	CASC3	92.7897	92.7661	6	0.526576
613	AURKB	92.7779	99.2447	19	-0.442657		Cluster32
614	POLR2I	92.7661	97.8405	19	-0.224362		Cluster26
615	MAPRE1	92.7543	96.7784	19	-0.124773		Cluster32
616	PPP4R4	92.7425	86.6769	4	1.14378
617	STAT6	92.7307	86.5471	6	0.942449
618	CSTF3	92.7189	96.0467	15	-0.012275		Cluster26
619	CACHD1	92.7071	89.0312	4	0.907431
620	ITGA6	92.6953	94.8844	5	0.354372	RNA	Cluster12
621	POLR3C	92.6835	85.839	8	0.888875
622	MAPK8IP1	92.6717	81.0479	3	2.1509
623	SP1	92.6599	97.9939	12	-0.171459		Cluster34
624	POLR1A	92.6481	80.7293	4	1.79779	CLIP	Cluster26
625	DIS3	92.6363	85.8803	2	1.85412	CLIP	Cluster10
626	LMNB1	92.6245	93.3443	4	0.603459
627	NUP85	92.6068	95.4567	19	-0.0252684		Cluster18
628	FOXO1	92.6068	92.6245	6	0.503004		Cluster44
629	SENP1	92.5891	95.9641	2	0.789243		Cluster18
630	SNRPA	92.5773	96.507	15	-0.0713928		Cluster26
631	SH2D3C	92.5655	82.5466	3	1.82036
632	ORC5	92.5537	95.2089	5	0.28975		Cluster35
633	DYNC1I2	92.5419	86.9601	10	0.698913
634	XRCC1	92.5301	94.194	5	0.406766
635	TAF7	92.5183	86.1341	8	0.836864
636	SPAG9	92.5065	83.5084	5	1.26998	CLIP&RNA	Cluster38
637	DSP	92.4947	82.0687	2	2.9626	CLIP&RNA	Cluster24
638	MGA	92.4829	77.8971	4	2.21362	CLIP	Cluster16
639	NDE1	92.4711	94.2058	16	0.0291069		Cluster32
640	DCTN3	92.4593	89.1669	11	0.474863		Cluster32
641	FANCG	92.4475	95.9759	5	0.195517		Cluster45
642	RNF8	92.4357	87.4911	5	0.886187		Cluster45
643	VAV2	92.4239	84.7298	6	1.05027		Cluster42
644	DNMT3B	92.4121	88.3998	4	0.905165
645	UBA52	92.4003	100	26	-0.955958	RNA	Cluster14
646	THRAP3	92.3885	77.2009	5	2.00141	CLIP	Cluster31
647	NUP37	92.3767	95.3446	19	-0.0525128		Cluster18
648	MYBBP1A	92.3649	82.1336	3	1.83374
649	NF2	92.3472	80.6703	3	2.0475	CLIP	Cluster24
650	TERF2IP	92.3472	94.0406	5	0.382486
651	NIFK	92.3295	99.5634	7	-0.337819	RNA	Cluster37
652	CALM1	92.3177	99.7876	25	-0.788371		Cluster27
653	GTPBP1	92.3059	90.3764	3	0.942512		Cluster1
654	LAMB1	92.2941	91.4562	2	1.19214		Cluster12
655	CDK7	92.2823	95.0083	10	0.0186212
656	RMI1	92.2705	89.338	2	1.33111
657	TNFRSF1A	92.2587	92.4593	5	0.508733
658	PPARA	92.2469	93.2381	8	0.268545		Cluster31
659	KAT8	92.2351	81.9566	5	1.37625
660	EIF5B	92.2233	84.3167	2	1.98393	CLIP	Cluster14
661	THRA	92.2056	89.8159	8	0.514946
662	NUDC	92.2056	87.6623	10	0.582745
663	BRAF	92.1879	96.2709	4	0.2231		Cluster44
664	WDR5	92.1702	94.2589	10	0.0905843		Cluster16
665	CDH18	92.1702	81.2013	4	1.60905
666	PGR	92.1525	78.0151	4	2.01499
667	PSMD5	92.1407	85.9275	3	1.28857
668	SNUPN	92.1289	91.2792	3	0.856884
669	BDNF	92.1171	77.3189	3	2.89835
670	RPS6KB1	92.1053	99.1857	8	-0.304465		Cluster29
671	ING3	92.0935	87.8393	5	0.800329
672	IARS	92.0817	73.5426	5	2.71325	CLIP	Cluster21
673	ACTN4	92.0699	81.8976	3	1.78621	CLIP	Cluster28
674	FBXW5	92.0581	84.2695	6	1.02508
675	ACD	92.0463	92.6481	4	0.573035
676	PHTF1	92.0345	87.3023	4	0.937853
677	SKI	92.0227	87.379	5	0.833486
678	AGO2	92.005	98.5839	5	-0.0580749		Cluster26
679	WRN	92.005	91.1494	6	0.502382
680	RPS6KA3	91.9873	91.1376	4	0.660178
681	PARD6A	91.9755	87.857	5	0.776781
682	TERF1	91.9637	99.6814	6	-0.398072		Cluster32
683	ATP1A3	91.9519	88.0045	2	1.39773		Cluster1
684	SNRNP40	91.9401	95.5157	15	-0.0939544		Cluster26
685	RFC2	91.9283	97.6988	8	-0.132495		Cluster4
686	CHAF1B	91.9164	92.1171	2	1.02943
687	TBL1X	91.9047	91.1848	12	0.21997		Cluster27
688	FBN1	91.8928	85.0956	2	1.73233	CLIP	Cluster12
689	ZFYVE9	91.881	77.5254	3	2.50379	CLIP	Cluster34
690	CUL4A	91.8692	86.4468	4	0.963148
691	KARS	91.8574	74.7463	5	2.22144	CLIP	Cluster21
692	PRKAR2A	91.8397	97.3094	3	0.233446		Cluster8
693	CALM3	91.8397	99.587	23	-0.790282		Cluster27
694	EPS15	91.822	95.1145	5	0.168133		Cluster19
695	AGRN	91.8102	90.2289	1	2.18383	CLIP	Cluster11
696	CEP41	91.7984	82.9065	8	0.976528
697	CAD	91.7866	80.5759	2	2.84915	CLIP	Cluster25
698	RAD9A	91.7748	95.3623	5	0.147103		Cluster45
699	RTF1	91.763	88.1284	4	0.835131		Cluster33
700	PPP1R15A	91.7512	77.1123	3	2.60872		Cluster1
701	DPYSL2	91.7394	87.1961	9	0.580062		Cluster42
702	ITGA5	91.7217	83.7267	3	1.46022
703	JAG2	91.7217	93.2027	4	0.476706
704	CEP290	91.704	83.3019	8	0.935713
705	PSMA6	91.6922	91.1022	4	0.625263
706	STAT5B	91.6804	76.5105	4	2.12138	CLIP	Cluster25
707	RPA2	91.6686	96.625	9	-0.0970076		Cluster35
708	CGN	91.6568	83.2724	3	1.48595
709	SUPT16H	91.645	78.3691	3	2.19228	CLIP	Cluster26
710	NFASC	91.6273	95.7281	5	0.110484		Cluster42
711	SCAP	91.6273	77.1418	5	1.77187	CLIP	Cluster19
712	FBLN2	91.6096	83.2547	3	1.48813
713	LAMA5	91.5978	92.8546	2	0.938695
714	ARHGEF2	91.586	80.3458	3	1.88626	CLIP	Cluster38
715	EIF2AK1	91.5683	94.5834	2	0.762421		Cluster41
716	RANBP2	91.5683	76.2273	3	2.9285	CLIP	Cluster10
717	ARHGEF12	91.5506	76.6639	4	2.05153	CLIP&RNA	Cluster38
718	PSMC4	91.5388	86.3229	3	1.15623
719	USP9X	91.527	80.3458	2	2.86955	CLIP	Cluster17
720	EPHB1	91.5152	88.3526	3	0.947511
721	PSMD14	91.5034	89.0312	4	0.735109
722	AXIN2	91.4916	90.0401	3	0.848479
723	LAS1L	91.4798	81.101	5	1.31556
724	HLA-A	91.468	97.7933	9	-0.228517		Cluster19
725	MAPK11	91.4562	94.9729	7	0.0393078		Cluster38
726	CXXC1	91.4444	83.6913	4	1.19311
727	ERBB3	91.4267	81.9094	3	1.62342
728	YEATS4	91.4267	87.8806	5	0.691748
729	TXNL4A	91.409	96.9908	16	-0.328887		Cluster26
730	PSME4	91.3972	82.3106	2	2.03958	CLIP	Cluster9
731	CSK	91.3854	80.6467	5	1.31884
732	PSMD7	91.3736	90.2407	4	0.627013
733	GSK3B	91.3618	97.7578	6	-0.103731		Cluster17
734	MEN1	91.35	88.5296	5	0.61373
735	EPRS	91.3382	71.0703	5	3.37814	CLIP	Cluster21
736	DES	91.3264	80.1865	2	2.6476
737	EIF3I	91.3146	89.0017	3	0.859276
738	GRB2	91.3028	99.5516	23	-0.865588		Cluster25
739	SPDL1	91.291	89.4796	10	0.295572		Cluster18
740	GTF3C2	91.2733	76.1683	6	1.67905	CLIP	Cluster26
741	SYNE2	91.2733	75.1475	3	3.21062	CLIP&RNA	Cluster13
742	LIMK1	91.2556	89.9634	4	0.620576		Cluster36
743	RFC3	91.2438	97.4569	8	-0.205728		Cluster4
744	NUP210	91.232	83.9863	11	0.687065		Cluster18
745	TONSL	91.2202	81.1305	5	1.2365
746	RND1	91.2084	94.3061	7	0.0572928		Cluster42
747	TAF5	91.1966	80.4048	5	1.30564
748	NOP2	91.1848	91.6863	2	0.943692
749	POT1	91.173	93.4978	4	0.343141
750	RPF2	91.1612	94.2884	3	0.441288		Cluster37
751	PHKB	91.1494	90.9488	1	1.81285	CLIP	Cluster40
752	ORC4	91.1376	95.8815	5	0.00745242		Cluster35
753	RB1CC1	91.1258	77.6552	3	2.1017	CLIP	Cluster29
754	TSG101	91.114	88.3172	4	0.69588
755	FEZ1	91.1022	83.2901	3	1.35569
756	MDM2	91.0904	98.7727	10	-0.507521		Cluster34
757	WDR82	91.0786	95.9995	8	-0.085598		Cluster33
758	PSMD13	91.0668	89.9221	4	0.592844
759	SMAD3	91.055	96.8846	10	-0.26519		Cluster34
760	DHX37	91.0432	80.9535	2	2.16292
761	EIF2S2	91.0314	96.0644	4	0.0639182		Cluster22
762	BRD1	91.0137	74.7286	4	2.13645	CLIP	Cluster16
763	MACF1	91.0137	86.0987	1	2.94092	CLIP	Cluster2
764	HSPD1	90.996	84.3639	2	1.61471	CLIP&RNA	Cluster30
765	SKP2	90.9842	96.2355	9	-0.178445		Cluster8
766	PRIM1	90.9724	88.7479	2	1.11399
767	MORF4L1	90.9606	97.7106	16	-0.509399		Cluster16
768	TJP2	90.9488	80.9358	2	2.11821
769	POLR2C	90.937	97.9703	19	-0.584676		Cluster26
770	MAPK3	90.9252	81.1482	4	1.29546
771	COPE	90.9134	82.7944	11	0.714476		Cluster19
772	DHX15	90.9016	84.0453	2	1.64567	CLIP	Cluster26
773	ORC2	90.8898	98.5603	8	-0.410643		Cluster35
774	MAP2K4	90.878	92.8192	5	0.242972
775	BCL2L1	90.8662	91.6863	4	0.441359
776	CEP72	90.8544	82.9065	8	0.821886
777	AP5Z1	90.8426	75.3363	5	1.75359
778	NEDD4	90.8308	90.6066	2	0.954776		Cluster44
779	RAF1	90.819	85.5027	3	1.05399		Cluster44
780	INPPL1	90.8072	80.7057	3	1.55043	CLIP	Cluster5
781	RARS	90.7954	76.717	5	1.5601	CLIP	Cluster21
782	MAP3K11	90.7836	81.3783	4	1.24632
783	MYB	90.7718	92.7897	5	0.218086
784	SRP72	90.76	87.6092	2	1.17143	CLIP	Cluster14
785	SMO	90.7482	88.8364	3	0.759481		Cluster44
786	ATP6V1A	90.7364	87.379	3	0.875068
787	TAF4	90.7246	89.4265	9	0.222016
788	TGFB1	90.7128	93.3266	3	0.447181		Cluster44
789	INPP5D	90.701	80.0212	5	1.22352
790	ATP6V1H	90.6892	90.0283	4	0.523204
791	CHEK2	90.6774	81.6911	4	1.19545
792	PRMT5	90.6656	92.0994	1	1.52328
793	TGFBR2	90.6538	88.9544	4	0.568761
794	MED8	90.642	90.5358	11	0.0921272
795	PPFIA2	90.6302	73.047	4	2.21792		Cluster42
796	ITGA4	90.6184	78.971	2	2.27042
797	TIMELESS	90.6066	78.3927	2	2.43186	CLIP	Cluster4
798	STAG1	90.5948	77.4369	3	1.86846	CLIP	Cluster13
799	CENPH	90.5771	93.6807	12	-0.0968384		Cluster18
800	C17orf49	90.5771	88.4706	8	0.294311
801	NOL6	90.5594	82.169	2	1.7494
802	NUP62	90.5476	86.1459	11	0.360625		Cluster18
803	KAT2A	90.5358	86.8244	9	0.387371
804	AP1S1	90.524	87.1843	13	0.235328		Cluster19
805	SKA3	90.5122	91.4739	11	0.00312608
806	FBXW7	90.5004	90.7187	5	0.319126
807	LAMC1	90.4886	86.2521	2	1.22894	RNA	Cluster12
808	APC	90.4709	75.0885	3	2.2361	CLIP&RNA	Cluster17
809	PSMA5	90.4709	89.3616	4	0.500184
810	CDH8	90.4532	81.2013	4	1.17844
811	HNRNPA0	90.4413	96.4185	16	-0.478989		Cluster26
812	MAGI2	90.4295	85.3788	5	0.694577
813	BRPF3	90.4177	74.7286	4	1.85663	CLIP	Cluster16
814	FBXL15	90.4059	75.8438	3	2.06003
815	ETF1	90.3941	87.1489	5	0.56179
816	MAPK8IP3	90.3823	79.0713	2	2.12658	CLIP	Cluster17
817	POLR1C	90.3705	88.0458	11	0.181173
818	CALM2	90.3587	99.8348	25	-1.33979		Cluster27
819	PDCD4	90.3469	88.1166	2	1.02154
820	WDR18	90.3351	89.6389	2	0.905504
821	SETD1A	90.3233	78.3101	2	2.29183	CLIP	Cluster16
822	GTF3C4	90.3115	76.1683	6	1.37913	CLIP	Cluster26
823	CDK9	90.2997	96.92	7	-0.276839		Cluster33
824	DPYSL4	90.2879	81.4019	5	1.00221		Cluster42
825	CASP9	90.2761	93.1909	5	0.112565		Cluster1
826	SMAD1	90.2643	82.6823	4	0.995561
827	EPHA4	90.2525	88.4883	4	0.528356
828	RAN	90.2407	98.5013	16	-0.763593		Cluster10
829	YWHAB	90.223	97.0262	9	-0.397514		Cluster39
830	ATRIP	90.223	96.1765	9	-0.322808		Cluster35
831	BRIX1	90.2053	95.262	3	0.152167		Cluster37
832	PSMB1	90.1935	86.8775	3	0.836379
833	ATAD5	90.1817	89.6743	2	0.886144
834	HUS1	90.1699	93.2676	4	0.185941
835	TBL1XR1	90.1581	94.8548	15	-0.332263		Cluster27
836	CTCF	90.1463	79.8383	3	1.4887	CLIP	Cluster33
837	CENPU	90.1345	90.1994	12	0.00512384	RNA	Cluster18
838	TAOK1	90.1227	87.8393	10	0.198175
839	IK	90.1109	79.561	3	1.48887
840	KIF21A	90.0991	77.3661	2	2.44628	CLIP	Cluster8
841	DCC	90.0873	84.5823	5	0.718666		Cluster42
842	DDX42	90.0696	78.2157	4	1.37838	CLIP	Cluster26
843	POLR2D	90.0696	97.8877	19	-0.734728		Cluster26
844	RRP9	90.0519	78.2983	2	2.21049
845	ZWILCH	90.0401	87.6623	10	0.209445
846	SF3B5	90.0283	96.5778	16	-0.560971		Cluster26
847	BAZ2A	90.0165	78.6937	2	2.06919	CLIP	Cluster16
848	ARCN1	90.0047	81.5848	11	0.663653		Cluster19
849	RAC1	89.9929	99.6578	25	-1.27312		Cluster38
850	STK3	89.9811	97.9821	8	-0.516128		Cluster36
851	CRMP1	89.9693	77.7319	4	1.40429	CLIP	Cluster24
852	SLK	89.9575	81.5317	2	1.69157	CLIP	Cluster16
853	GTF3C5	89.9457	78.0859	7	1.08138
854	UBE2S	89.9339	92.4239	6	0.0571843
855	SRSF9	89.9221	95.5393	15	-0.443973		Cluster26
856	FYCO1	89.9103	91.7158	1	1.38095		Cluster43
857	SKP1	89.8985	99.3392	12	-0.963857		Cluster8
858	SMC2	89.8808	76.7583	3	1.74898	CLIP	Cluster13
859	TBL3	89.8808	82.4168	3	1.1459
860	UBA1	89.8631	84.4937	1	2.45126	CLIP	Cluster17
861	PPP1R10	89.8513	86.6769	4	0.600515
862	MAML1	89.8395	82.8534	5	0.804657
863	HNRNPD	89.8277	97.4864	18	-0.73355		Cluster26
864	WASL	89.8159	92.1761	4	0.199299		Cluster42
865	UBA2	89.8041	83.5851	2	1.37892	CLIP	Cluster31
866	SYNE3	89.7923	96.0231	3	0.0221561		Cluster1
867	HDAC7	89.7805	84.718	9	0.425598
868	HLA-DRB1	89.7687	89.5917	12	0		Cluster19
869	GSK3A	89.7569	85.367	3	0.852468
870	ANAPC4	89.7451	89.7333	4	0.353999
871	POLB	89.7333	96.1883	12	-0.538639		Cluster27
872	RET	89.7215	81.7324	5	0.859168		Cluster42
873	TNIK	89.7097	75.59	2	2.68296	CLIP	Cluster20
874	AQR	89.6979	77.2835	2	2.1778	CLIP	Cluster26
875	NUP43	89.6861	95.3446	19	-0.559667		Cluster18
876	TINF2	89.6743	93.8518	4	0.0347403
877	H3F3B	89.6625	99.6106	14	-1.25583		Cluster16
878	SHOC2	89.6507	86.9955	4	0.541828
879	SMC4	89.6389	74.9705	5	1.42724	CLIP	Cluster13
880	CDH10	89.6271	81.2013	4	0.994002
881	DLL4	89.6153	92.6009	4	0.134517
882	AP1M2	89.6035	74.0146	5	1.51643
883	B9D2	89.5917	87.5384	10	0.122232
884	TLE1	89.5799	78.6937	3	1.39505		Cluster1
885	H3F3A	89.5622	99.7404	19	-1.53027		Cluster16
886	TUBA1A	89.5622	88.2936	3	0.578579		Cluster1
887	BCL6	89.5445	86.5589	5	0.441114
888	SDAD1	89.5327	94.43	2	0.395814
889	PLEC	89.5209	82.2811	1	3.5549	CLIP	Cluster14
890	EPHA3	89.5091	79.6023	2	1.76126	CLIP	Cluster25
891	MCAT	89.4973	89.6389	2	0.765869
892	RPS6KA2	89.4855	77.8971	3	1.4883		Cluster19
893	KANSL1	89.4737	81.101	5	0.870414
894	CDH11	89.4501	81.2013	4	0.974397
895	MFAP2	89.4501	99.1031	3	-0.297834		Cluster1
896	SLU7	89.4501	75.3953	3	1.801	CLIP	Cluster26
897	GPC1	89.4265	85.7918	7	0.380778		Cluster42
898	PSMB6	89.4147	89.2731	4	0.331976
899	ERCC8	89.4029	79.1834	4	1.12769
900	BPTF	89.3911	76.6816	2	2.19754	CLIP	Cluster16
901	PNPT1	89.3793	90.3764	3	0.431769
902	SMG7	89.3616	86.848	5	0.408055
903	NXF1	89.3616	88.3408	6	0.199218
904	KALRN	89.3439	82.6292	1	2.79304	CLIP	Cluster25
905	SAP18	89.3321	94.666	9	-0.324061		Cluster34
906	SF3B6	89.3203	97.3507	17	-0.804414		Cluster26
907	FAN1	89.3085	84.895	2	1.13483
908	CCNF	89.2967	80.033	3	1.25941
909	SYCP3	89.2849	93.1142	5	0
910	TDRD3	89.2731	96.507	2	0.147167		Cluster26
911	EPHA5	89.2613	77.3071	3	1.49522
912	SMAD2	89.2495	99.2625	21	-1.26001		Cluster34
913	BAP1	89.2377	76.9058	3	1.5493
914	GTF2F2	89.2259	96.9082	17	-0.768815		Cluster26
915	MED7	89.2141	92.0227	12	-0.197776
916	NAP1L4	89.2023	91.0314	3	0.353781
917	MED17	89.1905	91.9106	13	-0.216622		Cluster31
918	NDEL1	89.1787	91.2674	11	-0.125338		Cluster18
919	DYRK1A	89.1669	89.0489	4	0.28447
920	CHD7	89.1551	70.7222	3	2.48424	CLIP	Cluster16
921	KPNA2	89.1433	87.9632	2	0.82162		Cluster26
922	TAF9	89.1315	91.3972	10	-0.106021		Cluster33
923	HLA-C	89.1197	96.9318	8	-0.563947		Cluster19
924	PDGFRB	89.1079	82.523	5	0.683682
925	PPP2R5A	89.0961	88.0576	4	0.356306
926	PSMB8	89.0843	92.5596	5	0
927	FBXW11	89.0725	75.6785	3	1.63714	CLIP	Cluster8
928	CRK	89.0607	96.4657	15	-0.727333		Cluster36
929	SHMT2	89.0489	95.0909	1	0.830399
930	PSMA2	89.0371	98.4541	10	-0.876808		Cluster9
931	YWHAE	89.0194	96.1293	14	-0.688625		Cluster32
932	EFNB2	89.0194	89.515	3	0.407796	RNA	Cluster25
933	PHF21A	89.0017	94.3828	9	-0.352226
934	LARS	88.9899	67.5596	5	2.0942	CLIP	Cluster21
935	PSMD9	88.9781	90.642	4	0.164779
936	APBB1	88.9663	75.295	2	2.23825	CLIP	Cluster31
937	DCAF13	88.9544	80.7175	4	0.904927		Cluster37
938	MED27	88.9426	88.1402	9	0.0109866
939	IPO5	88.9308	81.8622	1	2.72567	CLIP	Cluster18
940	STAM	88.919	84.5645	5	0.506073
941	SORBS1	88.9072	81.4609	5	0.751382
942	PPP1CB	88.8954	94.0642	7	-0.227839
943	RPL8	88.8836	88.7951	7	0.0425783	RNA	Cluster14
944	RGMA	88.8718	84.4465	3	0.7849		Cluster1
945	ZFR	88.86	84.299	1	1.97063	CLIP	Cluster30
946	NBN	88.8423	85.603	4	0.517828
947	QARS	88.8423	74.5103	4	1.43912		Cluster21
948	POLR2L	88.8246	99.292	26	-1.47104		Cluster26
949	MYH11	88.8128	77.6552	4	1.13876
950	NCBP2	88.801	98.9261	20	-1.2934		Cluster26
951	EEF1A1	88.7892	97.9526	4	-0.448729		Cluster44
952	FHL2	88.7774	93.8636	6	-0.182702
953	ITGA1	88.7656	90.1168	3	0.328808
954	TAF1B	88.7538	81.6498	3	0.982044
955	CEP78	88.742	82.9065	8	0.4262
956	IFIT1	88.7302	78.3809	3	1.2447
957	RBM28	88.7184	98.7373	4	-0.584142		Cluster37
958	PSMC2	88.7066	88.0045	3	0.455722
959	DPYSL5	88.6948	81.638	5	0.689258		Cluster42
960	CXCR4	88.683	87.7626	4	0.302474
961	HNRNPA2B1	88.6712	96.1057	16	-0.805465		Cluster26
962	PLCG2	88.6594	71.5011	3	1.97364
963	E2F1	88.6476	94.6306	7	-0.35561		Cluster34
964	NCAM1	88.6358	98.0057	9	-0.867757	RNA	Cluster42
965	HNRNPH2	88.624	82.2516	4	0.721833
966	PKD1	88.6122	75.6667	3	1.4832	RNA	Cluster20
967	DEPTOR	88.6004	88.0694	4	0.253248		Cluster29
968	PPFIA3	88.5886	75.354	2	2.01597		Cluster44
969	BRD8	88.5768	77.6847	2	1.69429	CLIP	Cluster16
970	NOC4L	88.565	85.3316	3	0.633299
971	MED4	88.5532	91.5683	11	-0.256832		Cluster31
972	UTP18	88.5414	75.9618	2	1.90502
973	THOC5	88.5296	92.9077	1	0.945513
974	POLR2G	88.5178	97.7814	18	-1.11173		Cluster26
975	YBX1	88.506	98.7904	18	-1.36669		Cluster26
976	SHPRH	88.4942	90.1699	1	1.17095	CLIP	Cluster4
977	DARS	88.4824	70.6278	6	1.4538		Cluster21
978	NEDD8	88.4706	90.7187	4	0.0775963
979	RBPJ	88.4588	93.5214	7	-0.272045
980	INTS7	88.447	75.2183	2	1.99106
981	CDC26	88.4352	89.7333	4	0.122959
982	SMARCA1	88.4234	73.3951	2	2.3073	CLIP	Cluster16
983	CITED1	88.4116	77.3897	3	1.27031
984	HNRNPA1	88.3998	99.4572	8	-1.22617		Cluster21
985	USO1	88.388	78.912	3	1.11853		Cluster7
986	CDC42	88.3762	99.4749	20	-1.85928		Cluster38
987	RPS5	88.3644	92.3177	8	-0.221066	RNA	Cluster14
988	PAK2	88.3526	88.8187	4	0.155487		Cluster42
989	EPHA6	88.3408	85.485	3	0.599123
990	EIF2AK2	88.329	98.8081	5	-0.787674		Cluster43
991	BUD31	88.3172	85.6207	7	0.192622		Cluster26
992	IMP3	88.3054	89.7746	2	0.557853
993	SKA1	88.2936	95.8697	17	-0.856681		Cluster27
994	TNKS2	88.2818	91.3736	1	1.03959	CLIP	Cluster4
995	HLTF	88.27	90.1699	1	1.13427	CLIP	Cluster4
996	APEX1	88.2582	86.9011	3	0.483112	RNA	Cluster4
997	SH3PXD2B	88.2464	78.1095	2	1.56352	CLIP	Cluster20
998	TELO2	88.2346	84.5823	5	0.380393
999	LIG1	88.2228	85.5794	2	0.852314
1000	EXOSC7	88.211	91.1966	3	0.168307
1001	SRSF11	88.1992	96.7666	16	-0.979849		Cluster26
1002	ADCY2	88.1874	74.6755	2	1.99837		Cluster1
1003	PHF10	88.1756	86.4468	8	0.0533469		Cluster16
1004	EIF2AK4	88.1638	79.5787	1	3.00567	CLIP	Cluster22
1005	RAD23A	88.152	92.477	4	-0.000762296		Cluster9
1006	SPEN	88.1402	72.8936	2	2.26739	CLIP	Cluster16
1007	TM4SF1	88.1284	77.3366	5	0.907397
1008	CD2AP	88.1166	94.4654	10	-0.567463		Cluster42
1009	EXOSC5	88.1048	91.1199	3	0.165281
1010	SLIT2	88.0871	76.0798	5	1.00745		Cluster1
1011	PPARGC1B	88.0871	81.6616	6	0.54529
1012	CEP152	88.0694	83.355	8	0.290996
1013	DTX1	88.0576	83.9037	1	1.80452
1014	DCP2	88.0458	93.0375	3	0.0276397
1015	BAG3	88.0281	83.0894	3	0.760498
1016	INTS5	88.0281	72.8582	2	2.25052
1017	FGFR1	88.0104	80.6585	2	1.261	CLIP	Cluster39
1018	CAV1	87.9986	95.3977	4	-0.293286		Cluster42
1019	LAMA1	87.9868	85.0838	1	1.5987	CLIP	Cluster12
1020	CHERP	87.975	80.8591	2	1.23783
1021	HDAC10	87.9632	92.4475	8	-0.291707
1022	EIF2S1	87.9514	94.8135	4	-0.243254		Cluster22
1023	SNRPD3	87.9396	99.1385	19	-1.71111		Cluster26
1024	PSMC6	87.9278	92.3649	4	-0.0216435
1025	ADRM1	87.916	83.4907	2	0.99275
1026	POLR1B	87.9042	71.4657	2	2.56899	CLIP	Cluster26
1027	RFC5	87.8924	98.0883	9	-1.0202		Cluster4
1028	HNRNPA1L2	87.8806	97.6634	4	-0.563174		Cluster21
1029	PAF1	87.8688	76.363	3	1.27355
1030	MAP2K7	87.857	85.9275	5	0.213878
1031	POLR3D	87.8452	86.3583	8	0.0234954
1032	NEO1	87.8334	82.464	2	1.05106	CLIP	Cluster38
1033	TGFBR1	87.8216	92.3826	4	-0.0346682
1034	RCC2	87.8098	87.6623	10	-0.0617205
1035	LRP1	87.798	78.4045	1	3.37678	CLIP	Cluster25
1036	PSMA7	87.7862	92.5773	5	-0.150645
1037	ATP5B	87.7744	79.9386	1	2.51815	CLIP	Cluster7
1038	ANAPC7	87.7626	90.8721	5	-0.0313333
1039	PPARGC1A	87.7508	94.1291	13	-0.651395		Cluster33
1040	KLC1	87.7331	95.4095	6	-0.52178		Cluster27
1041	CEBPB	87.7331	83.1603	5	0.436066
1042	MED9	87.7154	88.7774	10	-0.162937
1043	KHDRBS1	87.7036	84.0925	5	0.364354
1044	FBXL5	87.6918	78.6051	4	0.853627		Cluster8
1045	SRF	87.68	84.6944	4	0.412983		Cluster45
1046	GEMIN4	87.6682	80.4225	1	2.35874	CLIP	Cluster26
1047	RBX1	87.6564	97.8287	15	-1.22168		Cluster8
1048	SNAPC2	87.6446	69.6955	3	1.98106
1049	CDC7	87.6328	95.3151	6	-0.53088		Cluster35
1050	GEMIN5	87.621	79.0713	1	2.65224	CLIP	Cluster26
1051	NTRK1	87.6092	71.1057	3	1.79737
1052	NCR1	87.5974	87.0545	8	0		Cluster16
1053	CLTB	87.5856	74.9528	5	1.02616
1054	DLGAP5	87.5738	83.3137	1	1.7715	CLIP	Cluster27
1055	CENPC	87.562	90.0047	12	-0.311294		Cluster18
1056	SUN1	87.5502	94.1822	4	-0.212328
1057	NELL2	87.5384	80.9771	2	1.1641		Cluster1
1058	RBM14	87.5266	80.7529	6	0.527702
1059	PMS2	87.5148	82.405	2	1.01733
1060	PMS1	87.5029	82.0392	2	1.06229
1061	CACNA1G	87.4911	73.3184	2	1.98026
1062	OFD1	87.4793	85.2372	9	0.0254035
1063	ALPL	87.4675	84.5409	1	1.57586
1064	TBP	87.4557	93.5096	11	-0.593184		Cluster26
1065	SALL1	87.4439	80.6821	1	2.13956	CLIP	Cluster32
1066	SNRPF	87.4321	99.0736	19	-1.88783		Cluster26
1067	TRAF2	87.4203	81.8858	2	1.05552
1068	ARHGEF7	87.4085	85.0484	4	0.331803		Cluster42
1069	CDK8	87.3967	93.1555	14	-0.623069		Cluster31
1070	PSMA4	87.3849	94.2589	5	-0.361086	RNA	Cluster9
1071	B2M	87.3731	93.8754	9	-0.5682		Cluster19
1072	SRSF2	87.3613	96.0939	15	-1.04007		Cluster26
1073	SNRPB2	87.3495	94.9965	15	-0.882774	RNA	Cluster26
1074	NOS3	87.3318	93.5568	5	-0.320963		Cluster42
1075	POLR3E	87.3318	80.2573	7	0.487182
1076	CCNY	87.3141	91.0078	2	0.336472		Cluster35
1077	ARFGEF1	87.3023	83.7503	1	1.63982	CLIP	Cluster8
1078	TUBGCP4	87.2905	84.3934	9	0.0503396
1079	RELN	87.2787	71.5129	3	1.62717
1080	PCBP2	87.2669	97.51	18	-1.39076		Cluster26
1081	CLK2	87.2551	81.9684	4	0.56254
1082	RPS14	87.2433	92.1643	8	-0.379791	RNA	Cluster14
1083	FOS	87.2315	85.8272	6	0.0711653
1084	DPF3	87.2197	86.4468	8	-0.00199419		Cluster16
1085	RPS3	87.2079	95.1853	10	-0.814052	RNA	Cluster14
1086	NELFCD	87.1961	83.9627	5	0.27405
1087	FES	87.1843	89.2023	10	-0.288611		Cluster42
1088	MEAF6	87.1725	91.8574	9	-0.436537		Cluster16
1089	MAPK8	87.1607	97.7696	7	-0.978706		Cluster21
1090	POLR3GL	87.1489	79.3368	7	0.499539
1091	CDC25A	87.1371	84.8714	4	0.291772
1092	RYR2	87.1253	72.5395	2	1.93716
1093	SRP68	87.1135	81.6911	1	1.83542		Cluster14
1094	CCND1	87.1017	97.215	11	-1.17169	RNA	Cluster35
1095	TNPO1	87.0899	85.5558	2	0.685507
1096	CEP63	87.0781	84.3285	9	0.0282334
1097	NGF	87.0663	97.6752	12	-1.29936		Cluster42
1098	NCAPG	87.0545	70.3328	3	1.7192	CLIP	Cluster13
1099	EIF4H	87.0427	96.861	5	-0.722966		Cluster22
1100	EIF3G	87.0309	88.6535	3	0.143532
1101	CACNA1I	87.0191	73.3184	2	1.80634
1102	GNL1	87.0073	81.8327	2	0.981753		Cluster1
1103	NAP1L2	86.9955	82.0923	2	0.951044
1104	CDK13	86.9837	82.0156	1	1.76931	CLIP	Cluster35
1105	PBRM1	86.9719	64.9398	3	2.54542	CLIP	Cluster16
1106	CEP135	86.9601	82.9065	8	0.155553
1107	RAD18	86.9483	96.8374	3	-0.429671		Cluster45
1108	EIF3C	86.9365	92.5596	3	-0.00905572
1109	NRP1	86.9247	84.2577	4	0.324581		Cluster42
1110	BUB3	86.9129	94.489	13	-0.862513		Cluster18
1111	PRKCD	86.9011	72.0675	3	1.47018
1112	INTS10	86.8893	77.7555	3	0.987859
1113	CDK19	86.8716	91.3618	10	-0.454905
1114	EIF3L	86.8716	87.3023	2	0.531862
1115	MAP3K10	86.8539	86.848	1	1.19133
1116	RPLP0	86.8421	89.4029	7	-0.19188	RNA	Cluster14
1117	ORC6	86.8303	94.7486	5	-0.533131
1118	TBKBP1	86.8185	91.8102	1	0.788227
1119	NRIP1	86.8067	75.2655	2	1.57811	CLIP	Cluster31
1120	CATSPERD	86.7949	68.4093	2	2.80822
1121	AGO1	86.7831	93.6335	2	0.0587642
1122	BIRC5	86.7713	97.6398	19	-1.57721		Cluster27
1123	MCL1	86.7595	98.4895	3	-0.655828		Cluster44
1124	SLC9A3R1	86.7477	95.8225	4	-0.538507		Cluster42
1125	DNAJC8	86.7359	95.5157	15	-1.08386		Cluster26
1126	HLA-B	86.7241	94.6778	5	-0.539916
1127	ATP6V1D	86.7123	87.379	3	0.221431
1128	NCAPD2	86.7005	64.0194	3	2.77497	CLIP	Cluster13
1129	AIFM1	86.6887	88.8718	2	0.368917
1130	NEUROD1	86.6769	85.4732	1	1.28756
1131	GRB10	86.6651	81.2603	3	0.711246		Cluster42
1132	RPS6	86.6533	93.9403	9	-0.676821	RNA	Cluster14
1133	DVL2	86.6415	76.7052	3	1.03276
1134	SYMPK	86.6297	77.7909	2	1.28003		Cluster1
1135	UIMC1	86.6179	80.4697	3	0.765777
1136	CDKN1A	86.6061	97.7224	8	-1.15348		Cluster35
1137	WDR74	86.5943	88.0222	1	1.02275		Cluster37
1138	UTP6	86.5825	87.4321	3	0.203752
1139	BNIP2	86.5707	94.1586	7	-0.602799
1140	MED11	86.5589	90.3115	11	-0.459068
1141	VCAN	86.5471	76.1919	2	1.41843	CLIP	Cluster24
1142	CENPQ	86.5353	93.6807	12	-0.780803		Cluster18
1143	NFE2L2	86.5235	80.9653	4	0.547579
1144	PTEN	86.5117	96.8492	6	-0.872029		Cluster42
1145	SLC9A3R2	86.4999	81.7088	2	0.934875
1146	SDCCAG8	86.4881	82.9065	8	0.120238
1147	PSMB2	86.4763	89.9221	4	-0.041954
1148	CDCA8	86.4645	88.6948	11	-0.369766
1149	RPS13	86.4527	95.5983	10	-0.976769	RNA	Cluster14
1150	MAP1S	86.4409	77.1536	1	2.52906	CLIP	Cluster25
1151	PTPRF	86.4291	68.2912	2	2.55775	CLIP	Cluster17
1152	USP47	86.4173	68.7869	2	2.41731	CLIP	Cluster8
1153	UBE2E1	86.3996	95.1381	7	-0.762342		Cluster32
1154	TCF7L2	86.3996	91.2556	8	-0.431348
1155	NR1D1	86.3819	73.4423	2	1.67561
1156	MICB	86.3701	76.4928	3	1.01053
1157	NUF2	86.3583	88.6122	10	-0.351156		Cluster18
1158	ZFPM1	86.3465	82.7236	3	0.550947
1159	SRSF6	86.3347	96.3772	16	-1.34869		Cluster26
1160	EIF5	86.3229	92.2174	4	-0.218476
1161	RBM17	86.3111	79.3958	3	0.78552
1162	NLE1	86.2993	93.0729	2	0.0462257
1163	ITGAV	86.2875	93.8872	5	-0.506371		Cluster12
1164	RPS20	86.2757	97.5749	11	-1.44745	RNA	Cluster14
1165	DOCK9	86.2639	74.3451	2	1.55315
1166	LRP8	86.2521	79.9563	3	0.745391
1167	RPS7	86.2403	94.0878	9	-0.780196	RNA	Cluster14
1168	MIS12	86.2285	92.6599	12	-0.731595		Cluster18
1169	POLA2	86.2167	88.7479	2	0.300935
1170	MAPT	86.2049	81.4845	3	0.613695		Cluster44
1171	ESR1	86.1931	99.9174	35	NA		Cluster31
1172	INTS3	86.1813	82.3224	2	0.825544
1173	EIF3E	86.1636	92.3531	4	-0.267675	RNA	Cluster22
1174	PHF5A	86.1636	97.2976	17	-1.66653		Cluster26
1175	USP16	86.1459	73.5072	2	1.60019
1176	BACH2	86.1341	78.5638	3	0.805071		Cluster44
1177	NAP1L3	86.1223	82.0923	2	0.840865
1178	INS-IGF2	86.1105	99.9292	21	NA		Cluster14
1179	FAM213B	86.0987	99.9882	1	-0.328347		Cluster27
1180	TRAF3	86.0869	81.1187	2	0.904439		Cluster1
1181	DHX16	86.0751	64.397	3	2.26622	CLIP	Cluster26
1182	HIST1H4C	86.0633	90.5771	2	0.17924	RNA	Cluster16
1183	SUCO	86.0515	88.7184	2	0.280458
1184	PSEN1	86.0397	93.2676	8	-0.657217		Cluster42
1185	PSME1	86.0279	85.8626	3	0.236013
1186	ABCE1	86.016	84.8832	1	1.22312
1187	CACNG3	86.0042	77.5903	2	1.18328
1188	ISG15	85.9924	83.8329	4	0.238432
1189	CDH3	85.9806	72.1029	3	1.29282
1190	DVL3	85.9688	79.089	3	0.747589
1191	DCAF6	85.957	69.3828	3	1.56601
1192	HAUS2	85.9452	91.5506	8	-0.527901
1193	EXOC2	85.9334	70.852	2	1.88873	CLIP	Cluster38
1194	USP11	85.9216	67.3885	2	2.4828	CLIP	Cluster16
1195	NCAPH	85.9098	64.3616	4	1.81786		Cluster13
1196	SPSB4	85.898	97.2268	1	0.150067		Cluster42
1197	PFN4	85.8862	76.894	2	1.23459
1198	NUDT21	85.8685	95.4803	15	-1.26468		Cluster26
1199	IKBKB	85.8685	85.7682	3	0.234725
1200	SMARCD2	85.8508	86.4468	8	-0.165274		Cluster16
1201	PABPC1	85.8331	94.6011	3	-0.349003		Cluster43
1202	TTK	85.8331	75.4543	2	1.35944
1203	DYNC1I1	85.8154	66.4975	3	1.82188
1204	ACTA1	85.8036	93.0847	6	-0.564994		Cluster42
1205	RPS6KA4	85.7918	77.8322	3	0.833195
1206	SRSF7	85.78	95.6927	15	-1.32539		Cluster26
1207	NUMB	85.7682	93.1142	7	-0.632907		Cluster42
1208	TEK	85.7505	71.9023	4	1.05037
1209	CENPM	85.7505	87.6623	10	-0.356369
1210	AP1G2	85.7328	85.0366	12	-0.212707		Cluster19
1211	HUWE1	85.721	74.3569	1	3.63561	CLIP	Cluster34
1212	LAMB2	85.7092	80.4579	1	1.68297	CLIP	Cluster12
1213	YWHAZ	85.6974	93.781	7	-0.701572		Cluster44
1214	NEDD9	85.6856	69.1409	3	1.51087		Cluster42
1215	YWHAQ	85.6738	93.1673	6	-0.586748		Cluster44
1216	EPB41	85.662	71.9259	2	1.67461	CLIP	Cluster5
1217	ING5	85.6502	87.9868	5	-0.145547		Cluster16
1218	G3BP1	85.6384	91.9932	4	-0.314949
1219	PSMD12	85.6266	90.3469	4	-0.1899
1220	CENPO	85.6148	93.6807	12	-0.954956		Cluster18
1221	UBE2I	85.603	95.6632	7	-0.962974		Cluster32
1222	NSL1	85.5912	88.447	10	-0.453776		Cluster18
1223	CACNA1C	85.5794	86.4763	3	0.134835
1224	MAP3K3	85.5676	84.0689	2	0.61124
1225	YWHAH	85.5558	92.0227	6	-0.513152
1226	MED19	85.544	88.8836	10	-0.504126
1227	SRSF5	85.5322	95.9051	15	-1.45075		Cluster26
1228	CHD1L	85.5204	69.3828	3	1.47886
1229	CKAP4	85.5086	82.2634	2	0.747078
1230	FOXO4	85.4968	80.5641	4	0.428705
1231	ARL3	85.485	90.2702	11	-0.621245		Cluster27
1232	SHH	85.4732	98.2063	4	-1.06435		Cluster42
1233	NUP54	85.4614	84.122	11	-0.136106		Cluster18
1234	KLF4	85.4496	69.1999	3	1.47816
1235	EIF4E	85.4378	99.1267	8	-2.09452		Cluster22
1236	SCRIB	85.426	66.1494	2	2.55312	CLIP	Cluster20
1237	ATP5A1	85.4142	79.4312	1	1.73347	CLIP	Cluster7
1238	KIAA0368	85.4024	74.8643	1	2.71215	CLIP	Cluster9
1239	PSMB4	85.3906	89.9221	4	-0.1861
1240	LMNA	85.3788	91.4208	3	-0.116384
1241	SETD1B	85.367	71.3122	2	1.70551	CLIP	Cluster16
1242	RPA3	85.3552	97.5749	10	-1.63781	RNA	Cluster35
1243	SIN3B	85.3434	79.974	2	0.896723
1244	SH3PXD2A	85.3316	76.0208	3	0.897054
1245	MAP3K7	85.3198	83.2134	3	0.366978
1246	FZD1	85.308	74.8879	3	0.978596
1247	VASP	85.2962	81.3606	3	0.512979
1248	EPC1	85.2844	82.7708	3	0.389448
1249	PIAS3	85.2726	76.8232	4	0.649683
1250	CETN2	85.2608	88.1756	10	-0.482678
1251	DYSF	85.249	78.1685	1	1.82632		Cluster44
1252	MAPRE3	85.2372	85.4496	5	-0.00888071
1253	STAT5A	85.2254	80.0802	4	0.422634
1254	SAP30	85.2136	94.5598	10	-1.10859		Cluster34
1255	TIPIN	85.2018	87.2669	4	-0.0428336
1256	ADCY8	85.19	72.8346	2	1.4572		Cluster1
1257	RPF1	85.1782	85.8154	1	0.999203
1258	CDH6	85.1664	81.5848	4	0.303304		Cluster1
1259	LSM2	85.1546	95.2443	3	-0.537309		Cluster26
1260	TST	85.1428	88.5768	1	0.764734
1261	TCERG1	85.131	74.4159	3	0.991413
1262	CENPP	85.1192	93.6807	12	-1.06248		Cluster18
1263	RACGAP1	85.1074	72.5749	2	1.46593	CLIP	Cluster27
1264	GTF3A	85.0897	77.5667	7	0.356295
1265	CTDNEP1	85.0897	86.8067	4	-0.0177378
1266	PABPN1	85.072	95.7871	15	-1.57183		Cluster26
1267	ATP5G1	85.0602	85.0071	2	0.456638	RNA	Cluster7
1268	PPP2R5C	85.0484	87.1725	4	-0.047255
1269	DNAJC2	85.0307	88.506	1	0.759554		Cluster22
1270	THBS1	85.0307	87.1371	4	-0.0456827	RNA	Cluster42
1271	ITCH	85.013	84.9894	2	0.454196
1272	TBCE	85.0012	93.8046	1	0.379336
1273	ULK2	84.9894	73.46	3	1.02601
1274	PLXNB2	84.9776	74.7109	1	2.39871	CLIP	Cluster17
1275	RPS16	84.9658	91.8928	8	-0.704866	RNA	Cluster14
1276	ZFYVE16	84.9481	70.5865	3	1.26554	CLIP	Cluster17
1277	EZH2	84.9481	84.1633	3	0.239563
1278	WDHD1	84.9304	74.8997	2	1.25377	CLIP	Cluster4
1279	ADAM15	84.9186	73.1237	2	1.38993		Cluster42
1280	TAF2	84.9068	71.8197	4	0.946346
1281	NEDD1	84.895	84.1515	8	-0.0972543
1282	TAF10	84.8832	81.3075	5	0.183678
1283	CSNK2B	84.8714	91.6332	3	-0.198465		Cluster44
1284	LSM3	84.8596	92.9195	5	-0.600114	RNA	Cluster26
1285	RPS9	84.8478	91.9283	8	-0.720791	RNA	Cluster14
1286	TGM2	84.836	73.0057	2	1.37819		Cluster1
1287	RUNX2	84.8242	96.0644	9	-1.39181		Cluster34
1288	ACTC1	84.8124	86.9778	4	-0.0642303		Cluster42
1289	SOCS3	84.8006	85.0602	5	-0.0291693
1290	NPHP4	84.7888	74.0028	2	1.31407
1291	HDAC8	84.777	94.2294	9	-1.06276
1292	SNRPC	84.7652	90.9252	3	-0.167309
1293	AGL	84.7534	66.8279	2	2.05846	CLIP	Cluster9
1294	DPF2	84.7416	74.109	3	0.962774		Cluster34
1295	CACNA1B	84.7239	70.5511	2	1.6492
1296	BCCIP	84.7239	93.7928	3	-0.403077		Cluster35
1297	RAB3GAP2	84.7062	73.2712	2	1.34426	CLIP	Cluster6
1298	GNAT2	84.6944	82.228	2	0.637109
1299	MBD1	84.6826	79.2719	3	0.577766
1300	SRSF1	84.6649	96.3299	16	-1.95284		Cluster26
1301	DLC1	84.6649	77.5254	1	1.80579
1302	TUFM	84.6413	80.6939	1	1.43558
1303	YWHAG	84.6413	94.7899	13	-1.39923		Cluster32
1304	LRP6	84.6236	77.9325	1	1.75602	CLIP	Cluster11
1305	PSMD8	84.6118	89.7038	4	-0.278358
1306	PPP3CA	84.6	89.0017	4	-0.236602
1307	CASK	84.5882	80.0094	1	1.50494	CLIP	Cluster3
1308	ALB	84.5764	86.6769	2	0.268812
1309	MED20	84.5645	91.5683	12	-0.89504		Cluster31
1310	BANF1	84.5468	88.4234	11	-0.634868		Cluster18
1311	MAP2K1	84.5468	84.2459	3	0.184863
1312	TFDP1	84.5291	86.6179	7	-0.288642
1313	UNC5B	84.5173	85.2549	2	0.371982
1314	SMG9	84.5055	83.0422	2	0.563364
1315	CNOT4	84.4937	89.5681	2	0.0553893		Cluster23
1316	PIK3R3	84.4819	82.1572	6	0.0243873		Cluster42
1317	MLST8	84.4701	86.6002	4	-0.0720427
1318	WDR75	84.4583	83.7857	2	0.510774
1319	OCLN	84.4465	78.7291	2	0.848703
1320	DAB2	84.4347	75.6195	2	1.12209
1321	STAT2	84.4229	75.5487	6	0.482376
1322	SMG1	84.4111	75.4661	1	2.04449	CLIP	Cluster14
1323	ZBTB17	84.3993	70.085	2	1.63366
1324	RHOQ	84.3875	90.5948	5	-0.485494		Cluster42
1325	PINK1	84.3757	74.9882	2	1.16549
1326	RNF2	84.3639	91.6509	7	-0.686839		Cluster34
1327	APP	84.3462	90.4472	3	-0.18518
1328	KLHL13	84.3462	64.4973	2	2.45597
1329	ECT2	84.3285	77.6316	3	0.654744
1330	PRKAR1A	84.3167	93.1319	3	-0.388228
1331	NOP56	84.3049	83.1485	2	0.532193
1332	PSMD11	84.2872	89.9457	4	-0.331835
1333	EXOSC1	84.2872	92.1525	3	-0.315438
1334	SRSF3	84.2695	95.6455	15	-1.78774		Cluster26
1335	PTPN21	84.2577	71.265	2	1.47532		Cluster42
1336	MAPK8IP2	84.2459	73.1237	1	2.44069	CLIP	Cluster17
1337	ITGA8	84.2341	74.05	1	2.29824
1338	PSMA3	84.2223	92.3826	5	-0.641618	RNA	Cluster9
1339	ADCY7	84.2105	69.5775	3	1.24598		Cluster1
1340	SMN1	84.1987	90.7482	2	0
1341	POLR2F	84.181	99.3274	27	NA		Cluster26
1342	DEPDC1	84.181	83.7975	4	0.0277057
1343	AP4M1	84.1633	68.6925	4	1.08904
1344	ULK1	84.1515	72.9526	3	0.940768
1345	NEK9	84.1397	71.2473	2	1.45351	CLIP	Cluster7
1346	ITGA3	84.1279	84.0335	1	1.0291
1347	ZWINT	84.1161	95.7163	12	-1.73922		Cluster18
1348	RPL12	84.1043	94.076	8	-1.08762	RNA	Cluster14
1349	HEATR1	84.0925	74.3333	1	2.19126	CLIP	Cluster37
1350	SAFB	84.0807	70.1853	2	1.54578		Cluster1
1351	CREB1	84.0689	95.6632	7	-1.26739		Cluster44
1352	POLR2J	84.0571	83.3963	3	0.192281
1353	RPS19	84.0453	92.2469	8	-0.863719	RNA	Cluster14
1354	GNAI2	84.0276	83.0068	2	0.508053		Cluster1
1355	EFNB3	84.0276	93.3798	2	-0.172804		Cluster42
1356	RPS24	84.004	92.1289	8	-0.856042	RNA	Cluster14
1357	CENPA	84.004	94.5126	12	-1.49147		Cluster18
1358	GRIN2A	83.9863	77.189	2	0.913695
1359	ZMYM3	83.9745	71.7843	1	2.76029	CLIP	Cluster16
1360	TSC1	83.9627	81.0302	2	0.638803
1361	TSR1	83.9509	79.1421	1	1.45099	CLIP	Cluster37
1362	ATP5D	83.9391	85.4319	2	0.288239
1363	THRB	83.9273	80.2809	3	0.428117
1364	BMI1	83.9155	72.7047	3	0.937305
1365	LEO1	83.9037	69.8135	3	1.17996
1366	CDC37	83.8919	83.0186	2	0.487497
1367	ZNF335	83.8801	75.295	1	1.93013
1368	EXOSC2	83.8683	94.7899	4	-0.847249
1369	ARHGAP32	83.8565	66.9106	3	1.37812	CLIP	Cluster25
1370	SMARCE1	83.8447	92.536	12	-1.13902		Cluster16
1371	CDK12	83.8329	83.4081	1	1.03868	CLIP	Cluster35
1372	PPP3CB	83.8211	86.2639	4	-0.138069
1373	IRAK2	83.8093	79.3014	2	0.742849
1374	SEMA3A	83.7975	85.3493	5	-0.166684		Cluster42
1375	DNAJC16	83.7857	85.3139	3	0.0143936
1376	RPL18	83.7739	89.6094	7	-0.63798
1377	MSH4	83.7621	95.2325	5	-1.09789		Cluster45
1378	DAG1	83.7503	78.8766	2	0.753323		Cluster1
1379	STRN3	83.7385	77.1654	2	0.885449
1380	KHSRP	83.7267	83.1013	1	1.04394
1381	VEGFA	83.7149	93.7456	7	-1.02704		Cluster29
1382	EXOC7	83.7031	74.2152	3	0.829195
1383	ANAPC10	83.6913	89.7333	4	-0.410341
1384	VKORC1L1	83.6795	97.1265	4	-1.22076		Cluster36
1385	STRIP1	83.6677	76.5105	2	0.918532		Cluster1
1386	FBXL3	83.6559	76.3512	3	0.653287
1387	RPL4	83.6441	88.8954	7	-0.617588
1388	TUBB1	83.6323	99.9056	7	NA		Cluster36
1389	PHF1	83.6205	86.0633	5	-0.255953		Cluster1
1390	FANCF	83.6087	92.8192	3	-0.468433
1391	CHD9	83.5969	71.4067	2	1.32056	CLIP	Cluster16
1392	ERCC6	83.5851	72.4805	2	1.2195
1393	FAH	83.5733	80.4461	2	0.631209
1394	PRPF3	83.5615	90.0873	5	-0.579851
1395	SYNCRIP	83.5497	78.8884	4	0.265566
1396	CENPN	83.5379	93.6807	12	-1.42365		Cluster18
1397	RPS6KA6	83.5143	77.8322	3	0.540628
1398	SKIL	83.5143	78.7468	2	0.725534
1399	CHUK	83.5143	81.5553	1	1.16756
1400	ETS1	83.4907	72.1324	2	1.24446
1401	CDK14	83.4789	90.819	2	-0.0465011		Cluster35
1402	TRIM27	83.4671	71.8492	3	0.934468
1403	MED21	83.4553	91.946	12	-1.16379		Cluster31
1404	EPS15L1	83.4435	79.1244	3	0.418907
1405	RBL2	83.4317	74.3805	1	1.94313	CLIP	Cluster35
1406	ATP6V0D1	83.4199	87.379	3	-0.0926155
1407	NDUFB7	83.4081	73.8317	1	1.98893
1408	ACTN2	83.3963	93.3089	9	-1.1942		Cluster42
1409	AGMAT	83.3845	85.3139	3	0
1410	MED10	83.3727	88.1992	9	-0.709133
1411	EXO1	83.3609	72.6516	2	1.1775
1412	GATA2	83.3491	80.7765	4	0.122115
1413	USP1	83.3373	75.4425	1	1.75683	CLIP	Cluster28
1414	RPL35	83.3196	88.3998	7	-0.623876	RNA	Cluster14
1415	CDH1	83.3196	98.8494	19	NA		Cluster20
1416	CTBP2	83.3019	85.2018	4	-0.128282
1417	IRAK1	83.2901	86.8244	4	-0.233282
1418	AHR	83.2783	84.954	4	-0.100849
1419	TRPC4AP	83.2665	66.6037	2	1.72305	CLIP	Cluster8
1420	PRKCA	83.2547	86.6002	2	0.1119
1421	NELFA	83.2429	80.8178	4	0.117946
1422	CCT6B	83.2311	97.0026	4	-1.30457		Cluster36
1423	UNC13B	83.2193	69.7663	1	3.24511	CLIP	Cluster6
1424	OPTN	83.2075	75.5723	2	0.937611		Cluster1
1425	ADCY5	83.1957	62.5679	2	2.39136		Cluster1
1426	TYK2	83.1839	74.8525	3	0.712264
1427	LRWD1	83.1721	73.4777	1	1.96998
1428	KTI12	83.1603	63.8895	2	2.07664
1429	TADA2B	83.1485	67.2174	3	1.24017
1430	SPC25	83.1367	87.6623	10	-0.711901
1431	ADCY1	83.1249	65.701	2	1.80771		Cluster1
1432	EXOSC6	83.1131	96.4008	4	-1.23125		Cluster10
1433	EIF3K	83.1013	88.6358	3	-0.243088
1434	CNOT8	83.0894	87.5029	3	-0.151807		Cluster23
1435	BCL2L13	83.0717	91.7158	1	0.304773		Cluster43
1436	ERCC4	83.0717	77.6965	3	0.491497
1437	PLD2	83.054	73.2594	2	1.07177
1438	ARHGDIA	83.0422	85.0248	4	-0.139192		Cluster42
1439	RHOG	83.0304	82.1926	3	0.152458		Cluster42
1440	DDR1	83.0186	70.2089	2	1.34308	CLIP	Cluster25
1441	CENPK	83.0068	94.3474	12	-1.77921		Cluster18
1442	RICTOR	82.995	71.3654	2	1.23613	CLIP	Cluster29
1443	INTS9	82.9832	74.0972	2	1.01906
1444	SGIP1	82.9714	85.1074	12	-0.599568		Cluster19
1445	ESCO1	82.9596	80.0448	3	0.30759
1446	PTTG1	82.9478	89.8041	4	-0.53193	RNA	Cluster32
1447	PPP2R1B	82.9301	86.081	2	0.104824
1448	PHKA2	82.9301	72.8818	1	1.95791	CLIP	Cluster40
1449	HSPBP1	82.9124	78.5638	2	0.654155
1450	FZR1	82.9006	86.9483	3	-0.13492
1451	BRD4	82.8888	74.1798	2	0.997378		Cluster45
1452	SNAPC4	82.877	69.6955	3	1.01879
1453	FLNC	82.8652	59.8124	2	4.29157	CLIP	Cluster25
1454	BCL3	82.8534	77.7437	3	0.453425
1455	NUP35	82.8416	84.122	11	-0.498486		Cluster18
1456	LIMA1	82.8298	69.8726	3	0.994681
1457	ATP5C1	82.818	85.4319	2	0.135485
1458	FBLN1	82.8062	75.6549	3	0.591325
1459	SOST	82.7944	75.0767	2	0.907397
1460	BAG5	82.7767	82.3696	2	0.371365
1461	CNOT1	82.7767	69.0878	1	2.85327	CLIP	Cluster23
1462	UNC5A	82.759	74.1385	2	0.983438
1463	MAX	82.7413	94.7368	11	-1.9955		Cluster34
1464	ABL2	82.7413	70.616	4	0.760129
1465	SAP130	82.7236	65.5417	2	1.73258	CLIP	Cluster33
1466	FARP2	82.7118	65.2348	3	1.32688		Cluster1
1467	RPL5	82.7	91.0491	7	-0.914546		Cluster14
1468	DCAF5	82.6823	69.3828	3	1.00591
1469	EPN1	82.6823	78.4635	3	0.363222
1470	PPP1R11	82.6646	67.7484	2	1.46297
1471	CEP70	82.6528	82.9065	8	-0.293951
1472	EIF4EBP3	82.641	97.8759	4	-1.77589		Cluster22
1473	PSMB7	82.6233	87.0427	3	-0.170807
1474	ADCY9	82.6233	62.5679	2	2.13138		Cluster1
1475	MED18	82.6056	90.3115	11	-1.12046
1476	MRE11A	82.5938	99.1975	10	NA		Cluster4
1477	INTS8	82.582	73.6429	2	0.966972
1478	DGCR8	82.5702	82.7472	2	0.320982
1479	NAP1L1	82.5584	91.5978	3	-0.524947		Cluster34
1480	WDR77	82.5466	92.6717	1	0.164324
1481	NGFR	82.5348	79.2719	2	0.57349
1482	IL4R	82.523	64.5858	2	1.80134
1483	FADD	82.5112	81.6202	2	0.41357
1484	UTP15	82.4994	82.0687	2	0.372233
1485	MIF4GD	82.4876	84.2341	2	0.193623
1486	ARHGAP35	82.4758	68.0434	1	3.11099	CLIP	Cluster25
1487	GRIK3	82.464	78.5402	1	1.22789		Cluster1
1488	RPS23	82.4522	92.0227	8	-1.15926	RNA	Cluster14
1489	ANAPC11	82.4404	90.8426	4	-0.669623
1490	RPL27	82.4286	89.3852	7	-0.834447	RNA	Cluster14
1491	PPP2R4	82.4168	98.4777	13	NA		Cluster17
1492	HSPG2	82.405	77.0474	1	1.37459	CLIP	Cluster29
1493	ANAPC15	82.3932	82.4935	4	-0.0443874
1494	MED30	82.3814	91.4385	11	-1.31679
1495	CCNC	82.3696	90.8721	10	-1.1901
1496	CCNH	82.3578	92.6953	9	-1.37882
1497	RPS8	82.346	92.2351	8	-1.20867	RNA	Cluster14
1498	GTF2H4	82.3283	77.549	3	0.38198
1499	PPM1D	82.3283	74.7994	2	0.855706
1500	PHKG2	82.3106	79.5374	2	0.524652
1501	NSA2	82.2988	91.291	2	-0.248951
1502	SGK1	82.287	87.8688	5	-0.603242
1503	HMG20B	82.2752	78.4163	2	0.580882
1504	ARHGAP6	82.2634	86.4055	4	-0.361993		Cluster42
1505	NRP2	82.2516	78.2039	3	0.323998		Cluster42
1506	CDH9	82.2398	81.2013	4	0
1507	CBX5	82.228	95.557	6	-1.75497		Cluster16
1508	BAG2	82.2162	93.1791	3	-0.709903
1509	RPLP2	82.2044	89.338	7	-0.883944
1510	PACS1	82.1926	60.5735	2	2.27132	CLIP	Cluster19
1511	ELP2	82.1808	68.1968	3	0.991646
1512	GRP	82.169	83.1721	3	0
1513	YAP1	82.1572	87.5856	3	-0.308563		Cluster44
1514	EPS8	82.1454	75.9264	2	0.75194
1515	E2F2	82.1336	74.9351	3	0.548675
1516	PRKCI	82.1218	77.2186	3	0.368209		Cluster1
1517	PRKAR1B	82.11	81.2898	1	0.946234
1518	MED6	82.0982	93.1437	14	-1.97057		Cluster31
1519	KLHL12	82.0864	69.1881	2	1.22838		Cluster1
1520	CTR9	82.0746	62.2728	2	1.93928	CLIP	Cluster26
1521	CNOT3	82.0628	78.7999	2	0.514639		Cluster23
1522	RPLP1	82.051	89.3852	7	-0.929111	RNA	Cluster14
1523	SEC63	82.0392	88.329	2	-0.112421
1524	NEURL1	82.0274	71.088	2	1.07926
1525	EFNA2	82.0156	70.793	2	1.11077
1526	APPL1	82.0038	82.5348	2	0.237329
1527	PKD2	81.992	83.1131	2	0.195309
1528	RPL11	81.9802	90.1168	7	-0.984502	RNA	Cluster14
1529	VCAM1	81.9684	84.7062	3	-0.0894041
1530	MNAT1	81.9566	90.4295	8	-1.10766
1531	CCAR2	81.9448	72.2563	1	1.78008	CLIP	Cluster30
1532	SUPT20H	81.933	67.2174	3	1.01859
1533	SNAP91	81.9212	73.5603	1	1.63025	RNA	Cluster19
1534	C1D	81.9094	91.7453	4	-0.831748
1535	EPHB3	81.8976	76.953	1	1.27822
1536	MED29	81.8858	91.5978	11	-1.491
1537	RPS29	81.874	92.1407	8	-1.32173	RNA	Cluster14
1538	ELL	81.8622	75.5251	3	0.467823
1539	CSNK1E	81.8504	86.9778	9	-0.828238
1540	FBXO31	81.8386	75.8438	3	0.445378
1541	HIP1	81.8268	65.9547	2	1.45367	CLIP	Cluster20
1542	PNKP	81.815	82.2811	4	-0.0976373
1543	PPP1R8	81.8032	84.4819	3	-0.100402
1544	PDPK1	81.7855	75.773	2	0.712508
1545	IGF2BP1	81.7855	67.1584	3	0.993977	CLIP	Cluster24
1546	RPS15A	81.7678	92.0581	8	-1.34488	RNA	Cluster14
1547	RCOR1	81.756	83.532	3	-0.0268263
1548	AMER1	81.7442	68.5745	1	2.30794	CLIP	Cluster8
1549	BCL2	81.7324	88.9072	3	-0.479306
1550	RUNX1T1	81.7206	79.8088	5	-0.0235566
1551	POLR1D	81.7088	87.0663	10	-0.930326
1552	TNK2	81.697	71.2473	2	1.01962
1553	SCARB1	81.6852	79.856	2	0.414201
1554	DOCK6	81.6734	67.2941	1	2.55144	CLIP	Cluster38
1555	SVIL	81.6616	68.067	1	2.35233	CLIP	Cluster20
1556	RGS3	81.6498	82.7236	1	0.776544
1557	DOCK11	81.638	67.2941	1	2.53405	CLIP	Cluster38
1558	MRPL23	81.6262	88.1874	1	0.3261
1559	SMARCAD1	81.6144	68.4919	2	1.22736	CLIP	Cluster34
1560	RPL34	81.5966	89.3144	7	-0.987336	RNA	Cluster14
1561	SCN8A	81.5966	70.0968	2	1.10707		Cluster39
1562	E2F4	81.5789	80.7883	3	0.0587852
1563	CACNG8	81.5671	77.5903	2	0.566374
1564	RPL36	81.5553	89.4973	7	-1.01092	RNA	Cluster14
1565	FHIT	81.5435	86.9129	1	0.434117
1566	CBLB	81.5317	72.8169	2	0.872687
1567	LSM7	81.5199	92.89	4	-1.02417	RNA	Cluster26
1568	ARHGEF4	81.5081	84.2813	1	0.626572
1569	TNFAIP3	81.4963	75.413	1	1.36929
1570	LSM5	81.4845	93.4034	5	-1.29912
1571	WDR3	81.4727	69.5657	1	2.04615	CLIP	Cluster37
1572	TMEM8A	81.4609	83.5733	1	0.690617
1573	KLHL22	81.4491	63.6181	2	1.65235
1574	CUL4B	81.4314	69.2471	2	1.1323	CLIP	Cluster8
1575	SPAG5	81.4314	71.324	1	1.78687	CLIP	Cluster27
1576	CDK16	81.4137	74.6991	2	0.74624
1577	COL4A1	81.4019	84.0217	1	0.640293
1578	ATP5EP2	81.3901	85.3965	2	0
1579	CNTN2	81.3783	80.2278	1	0.940037		Cluster34
1580	DOK1	81.3665	67.9254	3	0.893538
1581	USP39	81.3547	74.2506	1	1.45837
1582	SDC3	81.3429	85.8036	3	-0.257094		Cluster42
1583	WDR48	81.3311	72.392	1	1.63969	CLIP	Cluster28
1584	S100B	81.3193	81.933	3	0
1585	EED	81.3075	72.7637	2	0.848611
1586	RBM4	81.2957	94.1114	7	-1.81324		Cluster26
1587	CDH13	81.2839	81.2013	4	-0.0738492
1588	CACNA1H	81.2721	66.8633	1	2.41421	CLIP	Cluster11
1589	NOB1	81.2603	81.7442	1	0.81474
1590	TOE1	81.2485	75.7375	3	0.370802
1591	POLR3F	81.2367	80.2573	7	-0.218472
1592	SDC2	81.2249	88.7302	6	-0.954636		Cluster42
1593	SDC1	81.2131	82.8298	3	-0.0452532	RNA	Cluster42
1594	PBX2	81.2013	78.6464	1	0.993266
1595	BIRC2	81.1895	85.6915	1	0.466683
1596	BAX	81.1777	88.4588	3	-0.540076
1597	SYF2	81.1659	75.2183	3	0.386464
1598	RALBP1	81.1541	75.1475	1	1.3172		Cluster1
1599	PA2G4	81.1364	82.4935	1	0.703246
1600	RAD23B	81.1364	89.5563	3	-0.607386
1601	PSMB5	81.1187	88.3998	4	-0.722627	RNA	Cluster9
1602	SEC23B	81.1069	58.237	3	1.67782	CLIP	Cluster19
1603	RRAS	81.0951	86.5058	3	-0.369293		Cluster44
1604	STAM2	81.0833	81.7973	4	-0.15514
1605	HK2	81.0715	72.2799	1	1.56104		Cluster44
1606	VDR	81.0597	96.7548	13	NA		Cluster31
1607	UBE2M	81.0479	91.173	1	0.0598675
1608	GTF2H1	81.0361	90.701	8	-1.37131
1609	STARD13	81.0243	67.0758	1	2.23604
1610	SELL	81.0125	71.2178	2	0.907397
1611	CDKN1B	81.0007	90.2525	3	-0.670798		Cluster35
1612	HMGXB4	80.9889	77.4723	3	0.193814
1613	EIF3M	80.9771	87.3023	2	-0.163297		Cluster22
1614	ISY1	80.9653	84.6708	6	-0.594728
1615	NHP2L1	80.9535	96.3477	15	NA		Cluster26
1616	CRKL	80.9417	84.5291	6	-0.588927
1617	LIMK2	80.9299	63.5827	2	1.50076		Cluster36
1618	EIF4A1	80.9181	98.8789	6	NA		Cluster22
1619	PSMF1	80.9063	85.9275	3	-0.352369
1620	LRP4	80.8945	73.0824	1	1.43072	CLIP	Cluster11
1621	E2F6	80.8827	82.6646	5	-0.367115
1622	PTPRD	80.8709	65.9193	2	1.26268	CLIP	Cluster25
1623	ASAP1	80.8591	75.0649	1	1.26036	CLIP	Cluster20
1624	TGFB1I1	80.8473	67.949	2	1.11285
1625	KIF25	80.8355	97.5985	9	NA		Cluster27
1626	NDUFB11	80.8237	80.2278	2	0.261147
1627	SMAD7	80.8119	87.916	4	-0.723184
1628	FAU	80.8001	92.0817	8	-1.70872	RNA	Cluster14
1629	VHL	80.7883	95.6101	4	-1.89144		Cluster33
1630	ATP5O	80.7765	85.2785	2	-0.0443657
1631	CTNNBL1	80.7647	69.8253	1	1.78604		Cluster1
1632	ELN	80.7529	97.3979	2	-1.22484		Cluster1
1633	CDK6	80.7411	93.4624	3	-1.05458		Cluster35
1634	PTPN3	80.7293	71.3654	2	0.855526
1635	VLDLR	80.7116	65.1522	3	0.967018
1636	USP2	80.7116	79.8796	1	0.853072
1637	TCF3	80.6939	74.3156	5	0.117562
1638	NDUFV1	80.6821	73.8317	1	1.33892
1639	THOC6	80.6703	82.6292	1	0.624703
1640	NDN	80.6585	74.4513	2	0.641978
1641	CSN1S1	80.6467	98.1945	7	NA		Cluster34
1642	FKBP8	80.6349	76.6639	2	0.486218
1643	MAP4K4	80.6231	58.0954	2	2.10731	CLIP	Cluster25
1644	EPHA7	80.6113	68.9049	2	1.00992	CLIP	Cluster25
1645	DNAJB1	80.5936	86.7654	2	-0.170001
1646	ATP6V1F	80.5936	87.379	3	-0.519729
1647	CNOT10	80.5759	78.7999	2	0.303826		Cluster23
1648	SHMT1	80.5641	90.0755	1	0.0704706
1649	AGGF1	80.5523	78.3219	1	0.936161
1650	CBX4	80.5405	69.2707	2	0.967139
1651	RNF19A	80.5287	78.1862	1	0.943385
1652	ARNT	80.5169	71.7076	3	0.528878
1653	YEATS2	80.5051	66.9932	2	1.12411	CLIP	Cluster16
1654	GSPT1	80.4933	78.2393	1	0.932195		Cluster43
1655	GAB1	80.4815	78.9356	4	-0.0534764
1656	SNRPD1	80.4697	92.0699	5	-1.38146
1657	PSMC1	80.4579	90.5004	4	-1.01018
1658	CNOT11	80.4461	78.7999	2	0.283216		Cluster23
1659	EIF4EBP1	80.4343	86.7477	6	-0.875598
1660	FANCL	80.4225	92.8192	3	-1.00432
1661	PATL1	80.4048	88.7951	1	0.11055
1662	CACNG6	80.4048	68.4093	2	1.01242
1663	DAPK3	80.3871	75.9795	1	1.11949
1664	ABI1	80.3753	75.354	3	0.26965
1665	RPL27A	80.3635	89.1197	7	-1.24524	RNA	Cluster14
1666	POLR3G	80.3517	79.3368	7	-0.310939
1667	RPL7A	80.3399	89.3144	7	-1.27153	RNA	Cluster14
1668	GADD45B	80.3281	76.4456	1	1.05665
1669	PTPRZ1	80.3163	71.9613	1	1.44639	CLIP	Cluster5
1670	WBP11	80.3045	70.38	2	0.878158
1671	RRM1	80.2927	64.1138	1	2.73067	CLIP	Cluster14
1672	XPC	80.2809	71.8079	1	1.45542
1673	MED31	80.2691	88.2582	9	-1.34842
1674	VAC14	80.2573	57.9655	2	2.01558		Cluster28
1675	RIOK2	80.2455	91.822	1	-0.00136199
1676	PHB2	80.2337	81.5199	2	0.105674
1677	THOC7	80.2219	82.6292	1	0.583748
1678	SKA2	80.2101	91.4739	11	-2.38074
1679	RPL37A	80.1924	89.1551	7	-1.29012	RNA	Cluster14
1680	RPL35A	80.1924	89.2849	7	-1.30802	RNA	Cluster14
1681	MED22	80.1747	90.3115	11	-1.93497
1682	PRMT2	80.1629	83.7621	1	0.505279
1683	ETS2	80.151	58.6854	2	1.89108
1684	BUD13	80.1392	63.3467	1	3.04647	CLIP	Cluster26
1685	IMMT	80.1274	65.5653	1	2.23288	CLIP	Cluster15
1686	FGFR1OP	80.1156	89.6861	10	-1.71414
1687	CEP57	80.1038	83.532	8	-0.718673
1688	KLHL20	80.092	67.595	2	1.02774
1689	LTV1	80.0802	81.3901	1	0.670538
1690	POLR3H	80.0684	80.6113	8	-0.490849
1691	PARG	80.0566	68.8813	1	1.73798	CLIP	Cluster21
1692	PPP4R2	80.0448	87.5266	4	-0.788691
1693	KLHL7	80.033	63.6181	2	1.36701		Cluster1
1694	REPIN1	80.0212	73.4777	1	1.26468
1695	NPC1	80.0035	82.5584	1	0.570736
1696	ATP5I	80.0035	84.7711	2	-0.0741164	RNA	Cluster7
1697	PIK3C3	79.9858	74.8289	2	0.561259
1698	FGFR3	79.974	66.5801	2	1.09844		Cluster1
1699	SYCP2	79.9622	93.0021	5	-1.66017
1700	DMD	79.9445	77.8145	2	0.337201
1701	FBXW8	79.9445	76.7288	2	0.410328
1702	SRP54	79.9268	81.4727	1	0.652237
1703	CDH24	79.915	81.2013	4	-0.244601
1704	ITGA2B	79.9032	87.975	6	-1.10575
1705	PCGF1	79.8914	80.2101	2	0.165361
1706	VDAC1	79.8796	85.6915	1	0.3089		Cluster12
1707	HIST4H4	79.8619	92.9431	2	-0.720659
1708	GNB2	79.8619	72.5926	1	1.32487
1709	LRRK2	79.8442	68.8931	1	1.70765
1710	GNAS	79.8324	74.5339	1	1.18599	CLIP	Cluster35
1711	DCAF4	79.8206	69.3828	3	0.610458
1712	UNC5C	79.8088	69.1527	3	0.619554
1713	PSEN2	79.797	82.2988	3	-0.181295
1714	PSMB10	79.7852	86.1105	3	-0.51376
1715	EIF3H	79.7734	88.86	3	-0.745793
1716	APLF	79.7616	81.3193	5	-0.378072
1717	PEX6	79.7498	54.7793	2	2.60535
1718	RPL30	79.738	89.4147	7	-1.41659	RNA	Cluster14
1719	RPL23	79.7262	89.9929	7	-1.47741	RNA	Cluster14
1720	GLI2	79.7144	68.8459	1	1.69922	CLIP	Cluster16
1721	SPC24	79.7026	87.7154	10	-1.42308
1722	RPL38	79.6908	89.2495	7	-1.39851	RNA	Cluster14
1723	ATP5F1	79.679	84.9658	2	-0.129372
1724	TERT	79.6672	91.0196	5	-1.37755		Cluster44
1725	RNF40	79.6554	70.5511	1	1.50029		Cluster1
1726	PPIE	79.6436	70.1204	3	0.562719
1727	LDLR	79.6318	78.5107	2	0.227756
1728	INO80C	79.62	85.4614	6	-0.847231
1729	MYBL2	79.6082	68.5155	2	0.92434
1730	USP22	79.5964	67.2174	3	0.715258		Cluster1
1731	UPF3A	79.5846	92.4947	6	-1.88552
1732	TRIP6	79.5728	69.1232	2	0.872211
1733	NCALD	79.561	83.2311	11	-0.925625		Cluster19
1734	AKAP6	79.5492	62.0958	1	3.46456	CLIP	Cluster11
1735	BDP1	79.5374	60.3729	2	1.60465	CLIP	Cluster33
1736	REV1	79.5256	74.5811	1	1.13309
1737	AP1M1	79.5138	71.5601	4	0.256279
1738	ATP6V0A4	79.4961	79.738	1	0.739332
1739	THOC1	79.4961	90.0637	3	-0.861388
1740	DDX56	79.4784	79.1834	1	0.760348
1741	NTM	79.4666	66.5506	2	1.0279
1742	CUL2	79.4548	71.7312	1	1.34447		Cluster1
1743	ATP6V1E1	79.443	87.2787	3	-0.639461
1744	RPS10	79.4312	92.2823	8	-3.75967		Cluster14
1745	RHOA	79.4194	90.9606	4	-1.21804		Cluster42
1746	ODC1	79.4076	66.409	1	1.88003	CLIP	Cluster27
1747	CYCS	79.3958	93.0139	5	-1.8982
1748	GADD45G	79.384	78.0151	1	0.840644
1749	TDP1	79.3722	75.5605	2	0.428622
1750	NGDN	79.3604	69.0347	1	1.58959
1751	RAPGEF1	79.3486	63.3231	1	2.47657	CLIP	Cluster25
1752	RPS6KA5	79.3309	91.5978	3	-1.03604
1753	ANXA2	79.3309	82.759	2	-0.00183925	RNA	Cluster38
1754	DTNB	79.3132	82.9596	1	0.469988
1755	MAGI1	79.3014	62.9337	2	1.3162	CLIP	Cluster17
1756	TRIM33	79.2896	71.5247	2	0.683999
1757	AMPH	79.2778	66.5919	1	1.82658	CLIP	Cluster20
1758	ATP6V0A2	79.266	79.738	1	0.713465
1759	PAAF1	79.2542	74.2625	1	1.12216
1760	SAMM50	79.2424	72.3035	1	1.25712
1761	SUFU	79.2306	76.9176	2	0.306309
1762	ATXN7L3	79.2129	67.2174	3	0.661843
1763	RANBP1	79.2129	93.2263	2	-0.84196	RNA	Cluster18
1764	RPL6	79.1952	89.6389	7	-1.59656	RNA	Cluster14
1765	PRKCQ	79.1834	60.2195	2	1.54535
1766	MAP3K1	79.1716	64.2672	1	2.19299	CLIP	Cluster39
1767	ACTR5	79.1598	66.3264	1	1.82529
1768	CASP3	79.148	84.5528	2	-0.153711		Cluster44
1769	TGFBI	79.1362	91.527	3	-1.06628
1770	PIKFYVE	79.1244	65.6715	1	1.91983	CLIP	Cluster28
1771	TCF19	79.1126	82.5112	4	-0.469191		Cluster1
1772	WAS	79.1008	78.5933	3	-0.0140786
1773	POU5F1	79.089	84.1043	3	-0.416815
1774	TRIM24	79.0772	67.0404	1	1.71926	CLIP	Cluster31
1775	PRKG1	79.0595	82.1454	1	0.495561
1776	POLD3	79.0595	86.3347	1	0.145605
1777	NTN3	79.0418	65.8367	1	1.86627
1778	GEMIN6	79.03	87.9337	2	-0.465328
1779	FGFR2	79.0123	73.0352	1	1.15296		Cluster1
1780	AKT2	79.0123	86.9247	2	-0.361174		Cluster44
1781	NUPL2	78.9946	83.9863	11	-1.11584		Cluster18
1782	PELO	78.9828	96.6958	1	-0.627968		Cluster43
1783	DIMT1	78.971	91.6214	1	-0.128737
1784	MYH9	78.9533	64.6802	1	1.9893	CLIP	Cluster12
1785	GNGT2	78.9533	71.9141	1	1.23459
1786	METTL17	78.9356	85.7564	1	0.171679
1787	HIST1H4B	78.9238	90.5771	2	-0.680499	RNA	Cluster16
1788	KCNQ3	78.912	63.2936	4	0.71147	RNA	Cluster42
1789	IGHMBP2	78.9002	57.1926	2	1.77347
1790	MYO18B	78.8884	64.4796	1	2.00619
1791	GATAD2B	78.8648	83.054	3	-0.363178
1792	GNB2L1	78.8648	95.6809	8	NA		Cluster14
1793	NUAK1	78.8648	70.9464	2	0.657325		Cluster44
1794	SUZ12	78.8412	82.4522	3	-0.331328
1795	TCF4	78.8294	70.262	4	0.251563
1796	RBL1	78.8176	72.4097	2	0.550868
1797	SPATA13	78.7999	91.3205	1	-0.132204		Cluster1
1798	ASF1A	78.7999	78.434	3	-0.046995
1799	DNAJC6	78.7822	77.2599	1	0.797303		Cluster1
1800	RPL22	78.7704	89.5445	7	-1.79985
1801	WNT5A	78.7586	82.6823	4	-0.553655
1802	RPL29	78.7468	89.102	7	-1.73748	RNA	Cluster14
1803	CALD1	78.735	84.9304	4	-0.751005
1804	ACTR8	78.7232	66.3264	1	1.70278
1805	EIF3J	78.7055	89.2377	3	-0.972963
1806	LMOD1	78.7055	67.9136	2	0.833104
1807	EDC3	78.6818	74.6047	1	0.98368
1808	SENP2	78.6818	61.9542	2	1.27753
1809	ITGAE	78.6641	81.0715	3	-0.228995
1810	DYNC2H1	78.6523	51.8999	2	2.71541	CLIP	Cluster27
1811	CCNT1	78.6405	80.0979	3	-0.15447
1812	UBE2D2	78.6287	88.0812	4	-1.10879
1813	RPL15	78.6169	89.0725	7	-1.77509
1814	PHKA1	78.6051	75.2478	1	0.924235
1815	CNEP1R1	78.5933	86.6769	4	-0.948199
1816	DTL	78.5815	80.3635	3	-0.182241
1817	CATSPERB	78.5697	68.4093	2	0.790023
1818	ATP6V1B2	78.5579	80.151	1	0.58627
1819	BRD2	78.5461	76.1329	1	0.851042
1820	BSN	78.5343	60.4319	1	2.98889	CLIP	Cluster6
1821	ZMAT2	78.5225	84.8124	4	-0.755746
1822	CCNA1	78.5107	70.026	1	1.34041
1823	SPTBN5	78.4989	95.8048	7	NA		Cluster42
1824	CACNA1E	78.4871	68.4093	2	0.782955
1825	SARS2	78.4694	75.7375	3	0.029295
1826	HIST2H2AC	78.4694	87.4793	4	-1.05182	RNA	Cluster32
1827	SEMA3F	78.4517	64.3498	2	1.05083		Cluster44
1828	RNF113A	78.4399	61.4409	2	1.28103
1829	WWC1	78.4281	65.0342	1	1.80516
1830	ALS2	78.4163	61.2934	1	2.50478	CLIP	Cluster38
1831	SCN5A	78.4045	64.0666	1	1.9379
1832	NFYA	78.3927	77.9207	2	0.126256		Cluster45
1833	DDX55	78.3809	89.7746	2	-0.69716
1834	RRP1B	78.3632	69.6247	1	1.34931		Cluster1
1835	DDB2	78.3632	77.2363	3	-0.00972376
1836	CFTR	78.3455	96.0821	6	NA		Cluster42
1837	HABP4	78.3337	74.4041	1	0.959642
1838	CASC5	78.3219	93.6807	12	NA		Cluster18
1839	NUP50	78.3101	84.5114	11	-1.35043		Cluster18
1840	SIRT2	78.2924	90.9016	1	-0.161484
1841	HTRA2	78.2924	78.1213	2	0.104989
1842	TARBP2	78.2747	82.9773	1	0.324836
1843	ZIC2	78.257	65.9665	3	0.616362
1844	ATP5J2	78.257	91.0904	3	-1.20296	RNA	Cluster7
1845	SRCAP	78.2393	56.9271	2	1.68527
1846	SYT2	78.2275	73.5308	2	0.407509
1847	AIMP2	78.2157	77.071	6	-0.340653		Cluster21
1848	PLEKHA1	78.2039	99.7994	1	-1.6284		Cluster27
1849	ZNF830	78.1921	81.2485	3	-0.30361
1850	USP10	78.1803	64.1728	1	1.86066	CLIP	Cluster37
1851	KIF1B	78.1685	60.6679	1	2.51687	CLIP	Cluster27
1852	ELMO1	78.1567	62.8688	2	1.13729
1853	UBE2C	78.1449	89.7746	4	-1.42265
1854	RASSF1	78.1331	85.957	4	-0.947042
1855	PPP2R5D	78.1213	63.4411	1	1.95639	CLIP	Cluster27
1856	PQBP1	78.1095	77.549	1	0.697046
1857	HSPA1B	78.0977	89.9634	2	-0.738113
1858	RPL31	78.0859	89.2259	7	-2.04532	RNA	Cluster14
1859	ATP6AP1	78.0741	84.8242	2	-0.326087
1860	NR4A1	78.0623	77.9561	2	0.0917985
1861	ELP3	78.0505	66.9224	1	1.50749
1862	F2	78.0387	66.1199	1	1.60813		Cluster1
1863	CCT8L2	78.0269	97.4274	4	NA		Cluster36
1864	ARF6	78.0151	86.2934	3	-0.767466
1865	WWTR1	78.0033	67.7012	1	1.44206		Cluster1
1866	CDH15	77.9915	94.6424	8	NA		Cluster38
1867	DCAF11	77.9797	69.3828	3	0.383206
1868	COL17A1	77.9679	98.7491	3	NA		Cluster1
1869	EIF4E3	77.9561	93.6335	3	-1.77499
1870	DNMT3A	77.9443	76.9766	1	0.729877
1871	SOX4	77.9325	67.713	3	0.479258		Cluster1
1872	STON2	77.9207	60.9511	1	2.36572	CLIP	Cluster19
1873	AFAP1L1	77.9089	71.3359	2	0.532627
1874	EXOC1	77.8971	65.7541	2	0.874422
1875	EFNA1	77.8853	80.5169	5	-0.583986
1876	OBSCN	77.8676	59.7475	1	2.75469	CLIP	Cluster24
1877	BCS1L	77.8676	83.0304	1	0.274394
1878	FBXO6	77.8499	75.8438	3	0
1879	COPS2	77.8381	80.0566	4	-0.421751
1880	PTPRS	77.8263	60.0425	1	2.55484	CLIP	Cluster17
1881	NKAP	77.8145	78.2865	2	0.0331169
1882	RPL9	77.8027	88.5886	7	-2.01751	RNA	Cluster14
1883	TICRR	77.7909	64.1492	1	1.78937	CLIP	Cluster32
1884	PNN	77.7791	85.5794	2	-0.420835
1885	TRIO	77.7673	60.5971	1	2.3555	CLIP	Cluster20
1886	POLI	77.7555	85.2962	2	-0.406608
1887	RPL18A	77.7437	89.2967	7	-2.38787
1888	CACNB3	77.7319	73.3184	2	0.362181
1889	FLCN	77.7201	84.2105	1	0.161412		Cluster29
1890	ATP6V1C1	77.7083	87.379	3	-0.915298
1891	RPL37	77.6965	89.2141	7	-2.36111	RNA	Cluster14
1892	TRPC5	77.6788	74.6342	2	0.278786
1893	HCK	77.6788	93.9403	9	NA		Cluster25
1894	CCND3	77.6611	92.9549	3	-1.65121		Cluster35
1895	EHMT2	77.6493	61.612	1	2.14343	CLIP	Cluster16
1896	POLE4	77.6375	76.0975	3	-0.00356695
1897	CTTNBP2NL	77.6257	77.9915	2	0.044586
1898	PAK4	77.6139	85.072	1	0.0872002
1899	CRBN	77.6021	71.2768	3	0.219416
1900	KLHL3	77.5903	63.6181	2	0.996633
1901	NDUFB10	77.5785	79.2188	1	0.528282
1902	GGA1	77.5549	68.7338	2	0.653891
1903	RAB3GAP1	77.5549	62.8039	2	1.06329		Cluster6
1904	ATIC	77.5549	64.6507	1	1.70255		Cluster1
1905	POLR3K	77.5313	79.3368	7	-0.654641
1906	SYT1	77.5195	85.7328	2	-0.454497
1907	KAT7	77.5077	85.6443	1	0.0413914
1908	ATAD3A	77.4959	64.9162	2	0.888928
1909	LMTK2	77.4841	61.5589	1	2.10849	CLIP	Cluster24
1910	VAV1	77.4723	84.3521	6	-1.1003		Cluster42
1911	RGMB	77.4605	68.0257	2	0.684172
1912	PSMG2	77.4487	78.2275	1	0.588621
1913	TOP1	77.4369	69.7545	1	1.21834		Cluster1
1914	INTS1	77.4251	58.3432	1	3.15444	CLIP
1915	CDC25B	77.4133	70.8284	1	1.13058
1916	GEMIN7	77.3956	88.2464	2	-0.700592
1917	MAPRE2	77.3956	91.3205	1	-0.274893
1918	FHOD1	77.3779	67.831	1	1.34622
1919	XRCC4	77.3661	74.4867	2	0.264809
1920	RSF1	77.3543	65.996	1	1.49015	CLIP	Cluster27
1921	SMURF2	77.3425	67.359	1	1.37658
1922	GPC5	77.3307	75.4307	1	0.776968
1923	GPANK1	77.3189	79.0359	1	0.499807
1924	BAHD1	77.3071	72.0144	1	0.994915
1925	SGOL1	77.2953	92.3059	12	NA		Cluster18
1926	STIP1	77.2835	66.7807	1	1.40711
1927	NDUFS2	77.2717	73.8317	1	0.869774
1928	LSM6	77.2599	88.9308	4	-1.53597
1929	NELFE	77.2481	65.223	2	0.841978
1930	INO80	77.2363	66.4385	1	1.43608
1931	MYLK2	77.2245	59.6295	1	2.40992
1932	NME2	77.2126	77.6729	1	0.597231
1933	PLAU	77.2009	83.8683	4	-0.836828
1934	CD74	77.189	86.5707	10	-2.32545		Cluster19
1935	NME4	77.1772	92.4357	2	-1.12551		Cluster2
1936	PIAS2	77.1654	90.5594	3	-1.3945
1937	SGOL2	77.1536	91.946	12	NA		Cluster18
1938	TCIRG1	77.1418	79.738	1	0.440155
1939	ITGA2	77.13	85.5204	2	-0.509737
1940	E2F3	77.1182	76.8822	3	-0.120407
1941	LMAN1	77.1064	90.0165	1	-0.233472
1942	DROSHA	77.0946	57.8475	1	2.82915	CLIP	Cluster16
1943	POLE3	77.0828	84.4229	6	-1.19523
1944	PPP5C	77.071	67.1702	1	1.32287		Cluster1
1945	ITGA9	77.0592	76.2273	1	0.660107
1946	SHC2	77.0474	67.0109	2	0.680307
1947	HIST1H4J	77.0356	92.9313	2	-1.21774
1948	FOXO3	77.0238	71.7666	1	0.961937
1949	EMD	77.012	73.5898	2	0.251651
1950	TMED3	77.0002	80.8945	10	-1.08719		Cluster19
1951	NOL10	76.9884	79.0536	1	0.447834
1952	MRTO4	76.9766	90.996	2	-1.00015		Cluster37
1953	ARVCF	76.9648	62.4911	1	1.81463	CLIP	Cluster20
1954	PAK3	76.953	86.7831	2	-0.634504
1955	NAA10	76.9412	70.9582	2	0.440521
1956	ESR2	76.9294	93.4152	8	NA
1957	PDCL3	76.9176	73.0706	1	0.861086
1958	ANAPC13	76.9058	82.5761	4	-0.775139
1959	MCMBP	76.894	62.8157	1	1.78436		Cluster45
1960	SNIP1	76.8704	79.8678	4	-0.540786
1961	CTNND2	76.8704	61.907	1	1.88076	CLIP	Cluster20
1962	SIRT6	76.8704	59.417	1	2.30995
1963	RAB33A	76.8468	56.7914	1	3.65124
1964	MAD2L2	76.835	78.7999	2	-0.0303276
1965	ARRB2	76.8232	82.6292	2	-0.29773		Cluster1
1966	MYOM2	76.8114	57.8121	1	2.63169		Cluster42
1967	TAF5L	76.7996	67.2174	3	0.366967
1968	EXOSC3	76.7878	91.1199	3	-1.5802
1969	TTF1	76.776	56.9625	1	3.00889	CLIP	Cluster16
1970	MAPK9	76.7642	90.524	2	-1.01771
1971	ZNF143	76.7524	71.3477	3	0.101045
1972	RXRG	76.7406	78.9356	3	-0.341111
1973	FZD2	76.7288	62.5207	2	0.943054		Cluster1
1974	PLS1	76.717	72.0439	1	0.890537
1975	PPP3R1	76.7052	89.5327	4	-1.91411
1976	PSME3	76.6934	86.6356	3	-1.04657
1977	MAP2	76.6816	59.8537	1	2.08759	CLIP&RNA	Cluster39
1978	TCEB1	76.6698	94.017	6	NA
1979	PARN	76.658	79.5787	1	0.367427
1980	MYL6	76.6462	85.19	5	-1.32161		Cluster42
1981	IRF7	76.6344	76.4574	3	-0.158245
1982	USMG5	76.6226	84.6118	2	-0.50855	RNA	Cluster7
1983	A2M	76.6108	66.5683	1	1.28617
1984	UACA	76.5931	63.8659	1	1.55211	CLIP	Cluster41
1985	SIRT3	76.5931	64.3262	1	1.50948
1986	FRS3	76.5695	71.6073	4	-0.0232503
1987	SQSTM1	76.5695	81.4255	1	0.22838
1988	TAF12	76.5518	81.2721	5	-0.838532
1989	GNG2	76.54	85.1428	4	-1.15773		Cluster1
1990	E2F5	76.5282	72.4215	3	0.000338471
1991	MAPKAPK3	76.5105	65.4355	1	1.38035
1992	RECQL5	76.5105	76.068	2	0.0299329
[truncated: 6,482 more rows]

## Sheet: S4C. Ranked gene list (dneuron)
Supplmental Table S4C. Full list of ranked genes in dNeuron
	Percentile			Percentil rank score of gene, which is simultaneously based on diffusion score + Number of CLIP hits + CLIP-seq value fold change
	Diffusion score			Percentile rank score of genes based on integrative network node diffsuion of CLIP targets and RNA-seq DEGs
	Number of neighbors CLIP hits			Number of direct connection to CLIP target in the network
	CLIP-seq value fold change			Normalized fold change values derieved from CLIP-seq measurement
	Hits			Identification of hits in experiments; CLIP=CLIP-seq hit, RNA=DEG from RNA-seq, CLIP&RNA =
	Cluster ID			Cluster assignment ID from network-based clustering
Rank	Gene ID	Percentile	Diffusion score	Number of neighbors CLIP hits	CLIP-seq value fold change	Hits	Cluster ID
1	IRS1	100	99.7758	9	2.94859	CLIP	Cluster25
2	KIT	99.9882	99.6814	5	3.05086		Cluster25
3	PIK3CB	99.9764	99.5398	5	2.78968	CLIP	Cluster25
4	FYN	99.9646	99.9056	21	1.59816		Cluster25
5	RB1	99.9528	99.9882	7	1.57281	CLIP	Cluster16
6	HDAC5	99.941	99.7522	5	1.74783		Cluster34
7	PIK3CA	99.9292	99.941	8	1.39309	CLIP	Cluster25
8	PTPN11	99.9174	99.7286	6	1.59291	CLIP	Cluster25
9	IRS2	99.9056	99.469	7	1.79797		Cluster25
10	SRC	99.8938	99.9174	30	1.27087		Cluster25
11	CBL	99.882	99.8702	7	1.29146		Cluster25
12	KDR	99.8702	99.5988	4	1.57544		Cluster25
13	PLXNA4	99.8584	99.5575	2	2.30449	CLIP	Cluster24
14	PLXNA2	99.8466	99.5575	2	2.07903	CLIP	Cluster24
15	PPFIA2	99.8348	99.9528	3	1.34834		Cluster36
16	RHOG	99.823	99.528	4	1.40843		Cluster20
17	PLXNB1	99.8112	99.8938	5	0.78306		Cluster24
18	AKT1	99.7994	99.9292	32	0.581614		Cluster25
19	CDKN1A	99.7876	99.41	3	1.31626		Cluster8
20	CDK4	99.7758	99.3864	2	1.55142		Cluster4
21	ARHGEF12	99.764	99.2683	3	1.40483	CLIP	Cluster20
22	DPYSL5	99.7522	99.6106	3	0.981243		Cluster24
23	CDK5R1	99.7404	99.8112	5	0.685442		Cluster24
24	DPYSL2	99.7286	99.764	6	0.624383		Cluster24
25	DPYSL4	99.7168	99.5752	3	0.946764		Cluster24
26	ARHGEF11	99.705	99.5162	3	0.948248		Cluster20
27	ADCY7	99.6932	98.8789	2	2.74573		Cluster39
28	MAPK1	99.6814	99.8348	6	0.484394		Cluster25
29	CRMP1	99.6696	99.3038	2	1.2548	CLIP	Cluster24
30	RAC3	99.6578	99.8466	10	0.217076		Cluster24
31	CDK2	99.646	99.8584	5	0.306582		Cluster35
32	EPB41	99.6342	99.2211	2	1.15541		Cluster38
33	TCF19	99.6224	99.1739	2	1.04633		Cluster43
34	PRKDC	99.6106	97.1442	10	3.77653	CLIP	Cluster35
35	CCND1	99.5988	99.4926	5	0.265741		Cluster8
36	RHOA	99.587	99.4572	3	0.491594		Cluster20
37	PLXNA3	99.5752	99.823	3	0.264853		Cluster24
38	MTOR	99.5634	97.3448	11	2.7224	CLIP	Cluster29
39	DPYSL3	99.5516	99.6342	4	0.219548		Cluster24
40	CREBBP	99.5398	97.8405	14	2.34737	CLIP	Cluster31
41	EP300	99.528	97.5454	10	2.36634	CLIP	Cluster31
42	PTK2B	99.5162	95.9641	7	3.39568		Cluster25
43	PCNA	99.5044	99.9764	8	-0.115427		Cluster35
44	AP2A1	99.4926	97.3094	7	2.55603	CLIP	Cluster19
45	CTNNB1	99.4808	97.746	17	2.14137	CLIP	Cluster29
46	EIF4G1	99.469	94.5539	8	3.28601	CLIP	Cluster14
47	SEC24C	99.4513	97.2445	7	2.43762	CLIP	Cluster19
48	RXRA	99.4513	96.7194	11	2.22841		Cluster31
49	AR	99.4336	95.8933	8	2.59752	CLIP	Cluster34
50	NUP188	99.4218	95.7812	6	2.95574	CLIP	Cluster28
51	VEGFA	99.41	99.3156	2	0.64032		Cluster1
52	EPB41L1	99.3982	99.1857	1	1.31088		Cluster38
53	CDK5	99.3864	99.9646	11	-0.249861		Cluster24
54	NUP205	99.3746	95.7812	6	2.63253	CLIP	Cluster28
55	PAK2	99.3628	99.4454	4	0.160325		Cluster24
56	PRPF8	99.351	91.9991	8	3.98537	CLIP	Cluster26
57	PIK3R3	99.3392	99.4336	5	0.119391		Cluster25
58	ADCY2	99.3274	98.8671	1	1.9484		Cluster39
59	TYRO3	99.3156	98.9851	1	1.74815		Cluster42
60	SNRNP200	99.3038	91.7984	8	3.54843	CLIP	Cluster26
61	ADCY8	99.292	98.8081	1	2.0226		Cluster43
62	SPTAN1	99.2802	95.6809	5	2.69626		Cluster12
63	EPHA2	99.2683	92.5655	6	3.97708		Cluster25
64	POLR2B	99.2565	93.8636	9	2.39976	CLIP	Cluster26
65	SF3B2	99.2447	93.5214	9	2.42036		Cluster26
66	FARP2	99.2329	99.2565	2	0.582481		Cluster24
67	NR3C1	99.2211	92.8133	7	2.86197		Cluster34
68	COPB1	99.2093	95.8579	5	2.52056	CLIP	Cluster19
69	PKN1	99.1975	95.2679	5	2.67538	CLIP	Cluster20
70	ANK1	99.1857	96.9318	6	2.16274		Cluster12
71	ABL1	99.1739	96.2119	10	1.97762	CLIP	Cluster25
72	MED26	99.1621	94.5126	7	2.36982
73	NUP155	99.1503	95.8697	6	2.26225	CLIP	Cluster28
74	SF3B3	99.1385	91.3146	8	2.94037	CLIP	Cluster26
75	FOXO1	99.1208	93.0729	5	3.214		Cluster29
76	COPA	99.1208	96.1175	5	2.34954	CLIP	Cluster19
77	TPR	99.1031	97.333	8	1.92478		Cluster28
78	BRCA2	99.0913	93.8282	4	4.28489		Cluster4
79	TOPBP1	99.0795	95.2561	5	2.40287	CLIP	Cluster35
80	NUP133	99.0677	95.9405	9	1.93409	CLIP	Cluster18
81	SEC24D	99.0559	97.5336	8	1.83424		Cluster19
82	KPNB1	99.0441	97.4746	9	1.78895	CLIP	Cluster28
83	TRRAP	99.0323	94.2648	4	3.11466	CLIP	Cluster32
84	DYNC1H1	99.0205	90.5358	6	3.88213	CLIP	Cluster27
85	RUVBL2	99.0087	95.7399	7	2.04571		Cluster32
86	ANK2	98.9969	94.7958	4	2.86261	CLIP	Cluster12
87	NCOR1	98.9851	95.9051	6	2.08728		Cluster34
88	CDC20	98.9733	91.6804	5	3.2706		Cluster18
89	AXIN1	98.9615	93.9462	4	3.05481	CLIP	Cluster8
90	RET	98.9497	99.3274	4	0.136718		Cluster25
91	DHX9	98.9379	92.8015	10	2.08852	CLIP	Cluster26
92	BRCA1	98.9261	97.4864	14	1.6501		Cluster4
93	MED12	98.9143	95.6337	8	1.93162		Cluster31
94	SPTBN1	98.8966	93.7102	4	2.92018	CLIP	Cluster12
95	NUP153	98.8966	97.274	8	1.75655	CLIP	Cluster28
96	ERBB2	98.8789	93.958	4	2.79408	CLIP	Cluster25
97	ADCY9	98.8671	98.6429	1	2.06027		Cluster39
98	RAD51	98.8553	99.3982	4	0.00125351		Cluster4
99	WWTR1	98.8376	94.784	3	3.22314		Cluster29
100	NUP214	98.8376	96.0821	6	1.91058	CLIP	Cluster28
101	SEC24A	98.8199	97.2445	7	1.70019	CLIP	Cluster19
102	CKAP5	98.8081	91.6922	5	2.52895	CLIP	Cluster27
103	FANCD2	98.7963	93.5922	3	4.40243	CLIP	Cluster4
104	USP9X	98.7845	95.1381	3	2.82421	CLIP	Cluster29
105	NRP2	98.7727	99.351	2	0.328978		Cluster1
106	YAP1	98.7609	96.1057	4	2.08304		Cluster29
107	ERCC6L	98.7491	88.7656	5	3.31406
108	AFTPH	98.7373	97.4982	8	1.58854		Cluster19
109	JAK1	98.7255	92.1643	4	2.69404	CLIP	Cluster25
110	SEC31A	98.7137	96.7312	6	1.71301	CLIP	Cluster19
111	CLASP1	98.7019	95.1853	7	1.76554	CLIP	Cluster27
112	NOTCH1	98.6901	94.607	4	2.19403		Cluster8
113	MCM3	98.6783	92.3059	5	2.24332		Cluster35
114	DHX38	98.6665	91.5388	8	2.04812	CLIP	Cluster26
115	SIN3A	98.6547	95.7045	5	1.88886	CLIP	Cluster34
116	COPB2	98.6429	96.9849	6	1.69041		Cluster19
117	ADCY5	98.6311	98.6429	1	1.82192		Cluster39
118	NTRK2	98.6193	99.0559	1	1.1766		Cluster38
119	CUL1	98.6075	94.7132	6	1.83632		Cluster8
120	SPTBN2	98.5957	92.2469	3	3.62191	CLIP	Cluster12
121	DAXX	98.5839	93.9993	4	2.1858		Cluster34
122	CTNNA1	98.5721	93.486	6	1.93238		Cluster38
123	SPTB	98.5603	91.9401	3	3.63895	CLIP	Cluster12
124	NFX1	98.5485	89.1787	8	2.20409	CLIP	Cluster26
125	PRPF6	98.5367	93.2971	10	1.69834		Cluster26
126	PLK4	98.519	88.6712	5	2.6991
127	NCOA2	98.519	95.4449	8	1.62264	CLIP	Cluster31
128	NFKB1	98.5013	89.4383	5	2.49877
129	SEMA6A	98.4895	99.1385	2	0.502303		Cluster24
130	CLTC	98.4777	92.772	3	2.78177	CLIP	Cluster19
131	AP2M1	98.4659	97.8169	11	1.36299		Cluster19
132	KAT6B	98.4541	96.6132	3	2.08279		Cluster5
133	MED13L	98.4423	91.586	5	2.11488	CLIP	Cluster31
134	DCTN1	98.4305	94.0996	3	2.39085	CLIP	Cluster27
135	BAZ1B	98.4187	93.5568	3	2.43768		Cluster16
136	CALM3	98.4069	99.6578	6	-0.397189		Cluster17
137	CLSPN	98.3951	87.9868	4	3.32712	CLIP	Cluster35
138	JUP	98.3833	94.0406	6	1.73559		Cluster38
139	PPP1CA	98.3715	95.1499	6	1.65139		Cluster36
140	CENPF	98.3597	87.3731	4	3.55624		Cluster18
141	COPG1	98.3479	97.392	7	1.4415		Cluster19
142	CHAF1A	98.3361	95.0319	3	2.1349		Cluster16
143	PML	98.3243	91.8397	4	2.17319
144	AP2A2	98.3125	97.5808	8	1.38327		Cluster19
145	RAC1	98.3007	99.882	12	-0.685961		Cluster20
146	SF3B4	98.2889	92.9077	9	1.6352		Cluster26
147	CCNE1	98.2712	98.9733	1	1.17309		Cluster8
148	TOP2B	98.2712	91.4916	3	2.62425	CLIP	Cluster16
149	SEMA3A	98.2535	99.7404	3	-0.216695		Cluster24
150	NCOA1	98.2417	94.8548	6	1.61312	CLIP	Cluster31
151	NUP88	98.2299	96.6486	7	1.4364		Cluster28
152	BUB1	98.2181	89.2849	4	2.4431		Cluster18
153	EZR	98.2063	95.5393	3	2.01173		Cluster24
154	HCFC1	98.1945	90.0991	3	2.93268	CLIP	Cluster32
155	PPP2R1A	98.1827	93.5332	7	1.62057	CLIP	Cluster14
156	PSMD7	98.1709	91.4798	4	2.10747
157	SMC2	98.1591	97.5926	3	1.75452		Cluster13
158	SCAP	98.1473	94.9257	5	1.61977		Cluster19
159	SMC3	98.1355	93.3325	3	2.14335		Cluster13
160	SPTBN4	98.1237	95.0496	4	1.71871		Cluster12
161	IGF1R	98.1119	90.4532	5	1.93979	CLIP	Cluster25
162	HNRNPUL1	98.1001	90.7364	8	1.69818	CLIP	Cluster26
163	BUB1B	98.0883	92.3531	5	1.75669		Cluster18
164	CD2AP	98.0765	99.4808	4	-0.241862		Cluster24
165	CHD3	98.0647	88.1874	3	3.05284		Cluster34
166	PIK3CD	98.047	93.8046	6	1.5493
167	FES	98.047	99.6696	6	-0.544479		Cluster24
168	TADA3	98.0293	91.4208	4	1.9726		Cluster32
169	AURKA	98.0175	91.5624	4	1.95682		Cluster17
170	SCYL1	98.0057	97.6162	7	1.27764		Cluster19
171	SEC24B	97.9939	92.6953	4	1.84474	CLIP	Cluster19
172	BRPF1	97.9821	96.6368	2	2.13878		Cluster5
173	FN1	97.9703	91.7276	4	1.91172		Cluster25
174	MCM2	97.9585	86.5117	3	4.72753		Cluster35
175	CHD8	97.9467	87.7272	3	2.94759		Cluster32
176	TEX10	97.9349	88.4352	3	2.71504		Cluster32
177	AURKB	97.9231	93.9344	5	1.55604		Cluster18
178	AKAP9	97.9113	89.1433	6	1.81368		Cluster27
179	SMARCC2	97.8995	95.9287	4	1.52698		Cluster16
180	SMARCC1	97.8818	96.2473	6	1.33868		Cluster16
181	NUP210	97.8818	96.566	7	1.2754		Cluster28
182	TNKS1BP1	97.8641	94.371	2	2.35198	CLIP	Cluster23
183	PARP1	97.8523	94.253	6	1.44791		Cluster35
184	SEC23B	97.8405	90.8544	3	2.16254		Cluster19
185	KIF18A	97.8287	90.1404	4	1.95416		Cluster18
186	AP1B1	97.8169	91.3618	3	2.08487		Cluster19
187	NDC80	97.8051	89.7156	5	1.79902		Cluster18
188	IQGAP1	97.7933	92.6363	5	1.5954		Cluster24
189	TNFRSF1A	97.7814	88.8482	4	2.05351
190	CENPE	97.7696	86.4645	4	2.32341		Cluster18
191	MED13	97.7578	93.0965	6	1.48084	CLIP	Cluster31
192	NEK2	97.746	88.5532	4	2.04676		Cluster27
193	DDX23	97.7342	90.6833	9	1.48467		Cluster26
194	CPSF3	97.7224	91.2202	9	1.44698		Cluster26
195	AP2S1	97.7106	97.5218	8	1.12949		Cluster19
196	DNMT1	97.6988	91.7748	3	1.97421		Cluster34
197	TRIM28	97.687	85.8744	3	2.92828	CLIP	Cluster34
198	CALM1	97.6752	99.7168	6	-0.674091		Cluster17
199	MET	97.6634	90.9134	4	1.79277		Cluster25
200	KDM1A	97.6516	96.0939	4	1.43895		Cluster34
201	NGFR	97.6398	94.3592	3	1.72687
202	NUP160	97.628	96.4126	10	1.1098		Cluster28
203	MCM6	97.6162	86.1813	3	2.75245		Cluster35
204	TSC2	97.6044	89.5799	3	2.13658	CLIP	Cluster29
205	CLASP2	97.5926	93.2499	5	1.47001	CLIP	Cluster18
206	MAP3K5	97.5808	85.5204	3	2.84294		Cluster38
207	NISCH	97.569	93.8754	2	2.16029	CLIP	Cluster24
208	NCAPH	97.5572	97.687	2	1.78899		Cluster13
209	THBS1	97.5454	99.0441	1	0.811192		Cluster38
210	HSP90AA1	97.5336	96.2827	8	1.14091		Cluster29
211	SMARCD2	97.5218	93.6512	3	1.7333		Cluster16
212	SCRIB	97.51	88.5178	3	2.17935		Cluster38
213	TNKS	97.4982	95.2089	4	1.43578	CLIP	Cluster4
214	MDC1	97.4864	88.9899	4	1.85787	CLIP	Cluster4
215	NUP98	97.4746	90.0637	5	1.63084		Cluster28
216	RPTOR	97.4628	88.8836	3	2.10236	CLIP	Cluster29
217	BCR	97.451	84.1869	3	2.97003	CLIP	Cluster25
218	INSR	97.4392	92.1761	6	1.41947		Cluster25
219	SF3B1	97.4274	92.2587	9	1.3042	CLIP	Cluster26
220	MCRS1	97.4156	87.9986	3	2.17526
221	PPARA	97.4038	92.2115	7	1.35482		Cluster34
222	XRCC6	97.3861	94.312	4	1.45456		Cluster35
223	DNM2	97.3861	94.843	3	1.59235		Cluster19
224	MCM5	97.3684	88.6594	4	1.83491		Cluster35
225	SHC1	97.3566	96.5424	12	1.0177		Cluster25
226	SREBF2	97.3389	92.2823	4	1.5744	CLIP	Cluster23
227	PSMD2	97.3389	85.662	3	2.49518	CLIP	Cluster9
228	GTF3C1	97.3212	84.6472	3	2.71664	CLIP	Cluster33
229	MSH2	97.3094	94.135	3	1.62228		Cluster4
230	PPFIA1	97.2976	96.3182	4	1.31818		Cluster36
231	FAT4	97.2858	98.0765	1	4.11531	CLIP
232	FOS	97.274	89.2377	5	1.62523
233	SUV39H1	97.2622	91.1966	3	1.81387		Cluster34
234	HDAC11	97.2504	86.2521	3	2.31679
235	CDK5RAP2	97.2386	85.4732	4	2.0673		Cluster27
236	IRS4	97.2268	89.4619	2	2.54673
237	PTBP1	97.215	91.763	9	1.27186		Cluster26
238	PCNT	97.2032	84.5645	4	2.14305		Cluster27
239	KAT2A	97.1914	90.3705	5	1.50977
240	SOS1	97.1796	97.0616	11	0.956093		Cluster25
241	KAT6A	97.1678	90.7128	2	2.31457	CLIP	Cluster5
242	BAP1	97.156	89.1079	3	1.96615
243	MED24	97.1442	94.7604	7	1.14871		Cluster31
244	BCAR1	97.1324	91.9283	2	2.11891		Cluster25
245	NUP62	97.1206	96.5896	7	1.0491		Cluster28
246	DCHS1	97.1088	98.0765	1	2.98485	CLIP
247	TUBGCP2	97.097	86.9365	5	1.7001
248	CLP1	97.0852	90.5594	9	1.30309		Cluster26
249	CDC5L	97.0734	92.1289	6	1.31594		Cluster26
250	SIRT1	97.0616	95.8107	5	1.16755		Cluster34
251	IARS	97.0498	86.1695	2	3.36125	CLIP	Cluster21
252	CTDP1	97.038	89.6743	3	1.83262
253	INCENP	97.0262	88.9072	4	1.6787		Cluster18
254	UBE3A	97.0144	92.0699	3	1.65007	CLIP	Cluster34
255	BRPF3	97.0026	96.7784	2	1.62405		Cluster5
256	TAF6L	96.9908	92.7307	5	1.31205
257	NUP107	96.979	96.4598	10	0.935989		Cluster28
258	UPF1	96.9672	81.5671	4	2.34749	CLIP	Cluster14
259	RB1CC1	96.9495	86.5589	3	2.06802	CLIP	Cluster29
260	SNW1	96.9495	94.9375	7	1.08506		Cluster34
261	RBM22	96.9318	84.4819	5	1.82343		Cluster26
262	NCOA3	96.92	95.0673	7	1.07725		Cluster31
263	GTF2F1	96.9082	93.6866	9	1.08232		Cluster26
264	POLR3B	96.8964	88.4588	3	1.88117		Cluster33
265	CHD4	96.8846	85.603	2	3.04515	CLIP	Cluster34
266	PALB2	96.8728	87.975	2	2.42097		Cluster4
267	KARS	96.861	95.3387	2	1.66809		Cluster21
268	PSMB6	96.8433	89.8867	4	1.53336
269	ASH2L	96.8433	92.1171	4	1.40772		Cluster32
270	GIT1	96.8256	89.3203	2	2.18261	CLIP	Cluster25
271	HLA-B	96.8138	90.9606	4	1.45225
272	PTPRA	96.802	91.3264	3	1.60447		Cluster12
273	MED15	96.7902	94.7486	7	1.04187		Cluster31
274	PLK2	96.7784	89.6979	3	1.70438		Cluster5
275	MED16	96.7666	94.5539	7	1.04944
276	STAT1	96.7548	94.4182	6	1.09953		Cluster25
277	CCNF	96.743	85.8154	2	2.72346
278	RND1	96.7312	99.7876	5	-0.989239		Cluster24
279	ARID1A	96.7194	88.3644	2	2.25274	CLIP	Cluster16
280	CALM2	96.7017	99.6991	6	-1.02532		Cluster17
281	VIM	96.7017	94.4418	5	1.13646		Cluster3
282	UPF2	96.684	82.523	5	1.87047		Cluster14
283	CEP76	96.6722	83.7444	4	1.93286
284	JUN	96.6604	96.1765	9	0.898692		Cluster34
285	LEF1	96.6486	83.9745	3	2.14597		Cluster34
286	KNTC1	96.6368	90.1404	4	1.43683		Cluster18
287	PPFIA3	96.625	96.3299	2	1.49002		Cluster36
288	DIS3L	96.6132	88.1343	2	2.16044		Cluster10
289	TAF1	96.6014	87.9042	3	1.73893		Cluster32
290	SMARCA2	96.5837	95.5039	5	1.02731		Cluster16
291	HAUS2	96.5837	90.9252	5	1.2667
292	CCNE2	96.566	98.3951	1	1.31394		Cluster44
293	JAK2	96.5542	96.0703	6	0.936753		Cluster25
294	CCT7	96.5424	88.6417	2	2.03401		Cluster36
295	KIF2C	96.5247	88.7184	4	1.45946		Cluster18
296	EIF3F	96.5247	95.5865	6	0.945511		Cluster22
297	ATM	96.507	97.8287	12	0.722106		Cluster4
298	KCNQ2	96.4952	89.2967	5	1.3163		Cluster12
299	CSNK1D	96.4834	91.881	6	1.12065		Cluster27
300	RARS	96.4716	95.5275	2	1.48479		Cluster21
301	VAC14	96.4598	97.7165	1	2.18544		Cluster38
302	PTK2	96.4421	96.3418	8	0.848735		Cluster25
303	TP73	96.4421	84.8478	4	1.69244
304	OPTN	96.4244	99.1621	2	-0.0193013		Cluster42
305	XAB2	96.4126	83.5379	4	1.77321		Cluster26
306	MDM2	96.4008	95.4213	9	0.854952		Cluster34
307	NOTCH2	96.389	83.1839	2	2.81496	CLIP	Cluster34
308	CAP1	96.3772	89.0371	4	1.41995		Cluster30
309	ITGA5	96.3654	82.0392	2	3.10999
310	KAT5	96.3536	95.3505	5	0.9684		Cluster32
311	FLNA	96.3418	83.0658	2	2.70353	CLIP	Cluster25
312	AMOTL2	96.3299	93.604	2	1.54679	CLIP	Cluster29
313	SMARCD1	96.3182	97.1678	5	0.881734		Cluster16
314	USP7	96.3063	84.4937	2	2.3746	CLIP	Cluster9
315	ULK1	96.2945	91.645	3	1.37737
316	ACTB	96.2827	94.4064	5	0.9955		Cluster32
317	SF3A1	96.2709	92.5537	9	0.937459		Cluster26
318	SKI	96.2591	89.3439	3	1.49743
319	STAT3	96.2473	96.743	9	0.743572		Cluster25
320	LARS	96.2355	95.616	2	1.39913		Cluster21
321	ZBTB16	96.2237	80.9889	2	3.18353		Cluster34
322	PSMD1	96.2119	84.718	2	2.26004	CLIP	Cluster9
323	EP400	96.2001	82.1454	2	2.7181	CLIP	Cluster32
324	CUL3	96.1883	95.1617	5	0.937539		Cluster17
325	PTTG1	96.1765	84.4347	2	2.27761		Cluster2
326	PRPF4	96.1647	91.6214	9	0.943119		Cluster26
327	NCAPD2	96.1529	92.3413	1	2.866	CLIP	Cluster13
328	INPP5D	96.1411	87.739	3	1.54655
329	HDAC4	96.1293	92.9785	3	1.25155		Cluster34
330	CTNND1	96.1175	92.7543	4	1.1123		Cluster25
331	HDAC6	96.1057	89.8041	3	1.41813		Cluster34
332	STRN4	96.0939	85.4142	3	1.68351		Cluster36
333	CPS1	96.0821	90.4295	1	5.6337		Cluster38
334	IRAK1	96.0703	86.3583	2	1.98768
335	SPHK1	96.0585	88.0104	3	1.49814		Cluster36
336	LIMK1	96.0467	86.6179	2	1.95785	CLIP	Cluster24
337	PPP2R5A	96.029	83.1013	3	1.84049
338	HIF1A	96.029	89.0017	4	1.30163		Cluster34
339	HSPA8	96.0113	92.8959	3	1.23258		Cluster6
340	DLG1	95.9995	99.2329	1	0.117846		Cluster38
341	MED14	95.9818	94.8903	7	0.823229		Cluster31
342	NF2	95.9818	78.4753	3	2.30769	CLIP	Cluster3
343	TERF2	95.9641	92.3649	3	1.25506		Cluster4
344	ZW10	95.9523	90.2525	4	1.21784		Cluster18
345	BACH2	95.9405	92.8841	3	1.21868	CLIP	Cluster29
346	PHF10	95.9287	93.6512	3	1.16839		Cluster16
347	ZNF217	95.9169	83.3609	2	2.24561	CLIP	Cluster34
348	PCF11	95.9051	90.6125	9	0.939893		Cluster26
349	NCOR2	95.8933	90.0519	2	1.65064		Cluster34
350	DST	95.8815	85.9688	2	1.97116		Cluster39
351	EXOSC6	95.8697	91.291	2	1.55389		Cluster10
352	FIG4	95.8579	97.7165	1	1.88339		Cluster38
353	VPS51	95.8461	97.9054	1	1.85046
354	MYC	95.8343	96.1529	7	0.732398		Cluster32
355	ALPL	95.8225	79.6082	2	2.89949
356	SMC1A	95.8048	95.3623	10	0.681927		Cluster26
357	INTS7	95.8048	93.6276	2	1.39091
358	HTT	95.7871	80.4107	2	2.67037	CLIP	Cluster29
359	PPP1R15A	95.7753	82.5112	2	2.27952		Cluster36
360	ABCF2	95.7635	96.8079	1	1.92376
361	PRPF19	95.7517	89.9044	6	1.03268		Cluster26
362	RANBP2	95.734	81.3429	2	2.42502	CLIP	Cluster18
363	TUBGCP4	95.734	85.0661	4	1.44243
364	RPA1	95.7163	82.4286	2	2.27382		Cluster4
365	CSNK2A1	95.7045	94.9021	5	0.858291		Cluster34
366	GSPT2	95.6927	76.9058	4	2.02603		Cluster14
367	CNOT1	95.6809	89.9693	1	3.03433	CLIP	Cluster23
368	CEP78	95.6691	83.7444	4	1.49609
369	RELA	95.6573	93.2617	3	1.13556		Cluster34
370	SKIV2L	95.6396	88.9426	3	1.36068		Cluster10
371	HLA-C	95.6396	94.7368	6	0.807495		Cluster19
372	NCOA6	95.6219	85.0366	3	1.59689	CLIP	Cluster32
373	SH3KBP1	95.6101	89.4855	2	1.61847		Cluster25
374	MARS	95.5983	96.1647	2	1.21963		Cluster21
375	TMED7	95.5865	96.9849	6	0.697194		Cluster19
376	PELP1	95.5747	88.8246	3	1.35899
377	CENPL	95.5629	86.4114	4	1.33347
378	ARCN1	95.5511	96.92	6	0.68695		Cluster19
379	SMC4	95.5393	93.2145	1	2.2153	CLIP	Cluster13
380	MCM4	95.5275	80.8237	3	1.86414	CLIP	Cluster35
381	DDB1	95.5157	77.9325	2	3.08307	CLIP	Cluster8
382	KLHL21	95.5039	86.2993	3	1.47828		Cluster17
383	SMG6	95.4921	73.5426	3	2.87348	CLIP	Cluster14
384	HDAC3	95.4803	95.6573	8	0.67471		Cluster34
385	AXIN2	95.4685	86.7713	4	1.30029
386	SEC23A	95.4567	96.507	6	0.687856		Cluster19
387	NOTCH3	95.4449	78.4045	2	2.83475	CLIP	Cluster34
388	AMOTL1	95.4331	91.0963	2	1.46536	CLIP	Cluster29
389	GTF3C2	95.4213	85.5499	3	1.49888		Cluster33
390	SART1	95.4095	82.1336	4	1.52232		Cluster26
391	CDC42	95.3977	99.7994	6	-1.94612		Cluster25
392	PARP4	95.3859	77.0946	2	3.12777		Cluster17
393	SETD1B	95.3682	84.2164	2	1.91979		Cluster32
394	SMARCB1	95.3682	95.9995	6	0.687559		Cluster16
395	QARS	95.3505	93.3443	2	1.31094		Cluster21
396	CEP164	95.3387	92.4239	7	0.8135		Cluster27
397	RNPS1	95.3269	94.1822	13	0.645105		Cluster26
398	MSH6	95.3151	77.7555	2	2.83749	CLIP	Cluster4
399	PSMB1	95.3033	89.3085	3	1.27215
400	RARA	95.2915	93.7928	7	0.748195		Cluster34
401	EXT1	95.2797	97.9585	1	1.67065
402	ROCK1	95.2679	94.2353	2	1.25228		Cluster38
403	NUP93	95.2561	96.7666	7	0.615389		Cluster28
404	EIF3B	95.2443	76.4692	3	2.16103	CLIP	Cluster14
405	CTBP1	95.2325	96.2945	10	0.570478		Cluster34
406	CCAR1	95.2207	91.7394	9	0.763173		Cluster26
407	POLR3A	95.2089	78.4399	2	2.49728	CLIP	Cluster33
408	SEMA7A	95.1971	97.6516	1	1.65187
409	KIF4A	95.1853	76.4161	2	2.97944		Cluster17
410	BANF1	95.1735	96.2355	6	0.643126		Cluster28
411	TUBG1	95.1617	82.1926	3	1.62834
412	SALL1	95.1499	89.9457	1	2.40913		Cluster17
413	RBBP7	95.1381	95.7163	6	0.659492		Cluster34
414	SMG8	95.1263	75.5959	2	3.32513		Cluster14
415	TAF9	95.1145	93.3561	6	0.757223		Cluster32
416	FBXO18	95.1027	82.2457	2	1.97385	CLIP	Cluster30
417	NEDD1	95.0909	87.5502	5	1.0537
418	EEF2	95.0791	73.8258	3	2.35352	CLIP	Cluster14
419	GTF3C4	95.0673	76.7642	2	2.71764	CLIP	Cluster33
420	IL4R	95.0555	76.776	2	2.71068
421	CDKN1B	95.0437	99.3392	2	-0.514295		Cluster8
422	TMED3	95.0319	96.9849	6	0.590793		Cluster19
423	DCP2	95.0201	92.4829	3	1.03001
424	SMG5	95.0083	80.0566	4	1.53543		Cluster14
425	ANAPC1	94.9965	81.7442	2	1.98041		Cluster2
426	AGO2	94.9847	88.919	3	1.20431		Cluster30
427	SSRP1	94.967	81.1423	2	2.03087		Cluster33
428	TP53BP1	94.967	83.4317	2	1.81813	CLIP	Cluster4
429	PSMB5	94.9493	89.6271	4	1.02838		Cluster9
430	PRKCZ	94.9375	89.0135	2	1.45025		Cluster38
431	HGS	94.9257	89.1905	3	1.18449
432	AP1G1	94.9139	91.2438	2	1.32492	CLIP	Cluster19
433	HES1	94.9021	79.325	2	2.18008
434	POLR2E	94.8903	96.1293	12	0.499542		Cluster33
435	PPP2R2C	94.8726	89.2613	4	1.02872		Cluster36
436	CEBPB	94.8726	85.9924	4	1.18892
437	EXOSC2	94.8548	90.0283	2	1.37014
438	SPOP	94.843	90.3115	1	2.18514
439	PSME4	94.8312	80.8945	2	2.0178	CLIP	Cluster9
440	PRRC2A	94.8194	88.5827	1	2.43266	CLIP	Cluster21
441	LZTS1	94.8076	85.8449	3	1.34391		Cluster33
442	APC	94.7958	77.3661	2	2.42358	CLIP	Cluster8
443	PAK1	94.784	95.7989	6	0.612738		Cluster20
444	SMAD4	94.7722	96.7076	5	0.61611		Cluster34
445	KIF2A	94.7604	86.4114	4	1.1557		Cluster18
446	ILF3	94.7486	95.3033	4	0.758618		Cluster35
447	RPA2	94.7368	84.3285	3	1.42065		Cluster35
448	LIMK2	94.725	87.8924	1	2.53957	CLIP	Cluster24
449	CPSF2	94.7132	91.4385	9	0.69661		Cluster26
450	MED20	94.7014	95.2325	8	0.574025		Cluster31
451	FAN1	94.6896	91.1494	2	1.29729
452	CAV1	94.6778	99.3746	3	-0.907327		Cluster25
453	MAP1B	94.666	76.068	2	2.57164	CLIP	Cluster25
454	PLCG1	94.6542	93.1437	3	0.949905		Cluster25
455	NRP1	94.6424	99.2802	2	-0.535624		Cluster1
456	PPP4R1	94.6306	80.0153	2	2.02728		Cluster36
457	PKD1	94.6188	84.5173	3	1.3664		Cluster38
458	MBD3	94.607	87.8806	3	1.19512
459	MED19	94.5952	94.1468	7	0.613702
460	LRP4	94.5834	86.9837	1	2.57748		Cluster11
461	TGS1	94.5657	82.287	4	1.33974
462	SUPV3L1	94.5657	88.1343	2	1.43505		Cluster10
463	KLF5	94.548	75.0413	2	2.75255
464	EGR1	94.5362	87.68	3	1.20326
465	KPNA2	94.5244	91.35	2	1.25188		Cluster30
466	HDAC1	94.5126	97.7578	14	0.377598		Cluster34
467	FOXO4	94.5008	84.8832	3	1.33554
468	NPRL3	94.489	90.3587	1	2.06411
469	EIF3A	94.4713	75.8438	2	2.48443		Cluster14
470	FLNC	94.4713	74.6401	2	2.76049		Cluster42
471	PLK1	94.4536	97.4274	12	0.385266		Cluster27
472	LRP5	94.4418	74.2152	2	2.81885		Cluster42
473	CEP72	94.4241	83.7444	4	1.23096
474	CCT5	94.4241	88.0812	2	1.40738		Cluster36
475	KIF3B	94.4064	82.2457	2	1.76668		Cluster17
476	INTS5	94.3946	84.4583	1	3.25809
477	COPE	94.3828	96.8492	6	0.520363		Cluster19
478	ARHGEF2	94.371	82.405	2	1.74503		Cluster38
479	TLE1	94.3592	77.2245	2	2.21602	CLIP	Cluster34
480	PHF20	94.3474	83.1957	2	1.68988		Cluster32
481	DLL4	94.3356	86.7123	2	1.45895
482	HLA-A	94.3238	94.5716	6	0.594869		Cluster19
483	DYNC2H1	94.312	78.1862	2	2.07965		Cluster27
484	NUDC	94.3002	86.4114	4	1.06997
485	ESR1	94.2825	100	19	NA		Cluster34
486	NADK	94.2825	98.0765	1	1.42253
487	POLR3H	94.2648	86.9129	4	1.04392
488	TIMELESS	94.253	78.6523	2	2.0329		Cluster35
489	CD74	94.2412	95.5511	6	0.550044		Cluster19
490	RUVBL1	94.2294	95.1735	6	0.562174		Cluster32
491	BTRC	94.2176	95.3741	7	0.52039		Cluster8
492	SSNA1	94.2058	90.1935	5	0.807914		Cluster27
493	SKA1	94.194	90.2643	4	0.890994		Cluster18
494	CAPN6	94.1822	76.4161	2	2.21794
495	SMAD1	94.1704	85.5322	4	1.0857
496	MED8	94.1586	94.5244	7	0.542082
497	RAD21	94.1468	91.0078	2	1.18734		Cluster13
498	CCNB1	94.135	84.1633	1	2.89297		Cluster2
499	CLIP1	94.1232	90.937	6	0.705422		Cluster18
500	TGFB1I1	94.1114	76.54	2	2.16777
501	DPF3	94.0996	93.6512	3	0.843599		Cluster16
502	MED7	94.0878	94.6306	7	0.531979
503	SMARCAL1	94.076	78.1095	2	2.01506		Cluster35
504	SLC9A3R1	94.0642	99.1975	1	-0.0340288		Cluster43
505	THRAP3	94.0524	85.6502	2	1.45957		Cluster31
506	STK11	94.0406	86.5353	3	1.154
507	TAF4	94.0288	92.7897	5	0.670608
508	ARHGDIA	94.017	97.0498	6	0.45962		Cluster20
509	MED29	94.0052	94.6542	7	0.524572
510	HUWE1	93.9934	82.7295	1	3.58913	CLIP	Cluster34
511	PSMD8	93.9816	90.2053	4	0.864095
512	PARD6A	93.9698	85.6148	3	1.20239
513	SEMA3F	93.958	98.9969	1	0.223485		Cluster38
514	MED18	93.9462	94.4772	7	0.527584
515	RNF8	93.9344	95.4803	3	0.745822		Cluster4
516	HNRNPM	93.9226	93.0375	10	0.511985		Cluster26
517	TCF7L2	93.9108	93.4388	5	0.635489
518	BRD1	93.899	88.7538	1	2.03831	CLIP	Cluster5
519	AAAS	93.8813	96.566	7	0.429222		Cluster28
520	EPRS	93.8813	83.2311	1	3.01382	CLIP	Cluster21
521	MAPK14	93.8636	94.2884	3	0.793697		Cluster25
522	RBBP8	93.8518	87.5384	2	1.34294
523	DBF4	93.84	81.0597	2	1.71799
524	MAD1L1	93.8282	86.9601	4	0.979963		Cluster18
525	CCT6A	93.8164	87.0191	2	1.34994		Cluster36
526	SLC7A5	93.8046	87.5797	1	2.11295
527	KIFAP3	93.7928	81.5553	2	1.67196		Cluster17
528	GATAD2A	93.781	87.0899	3	1.09057
529	CXCR4	93.7692	86.2639	4	0.997042
530	SQSTM1	93.7574	86.5943	1	2.1872
531	CDH2	93.7456	95.4685	8	0.429383		Cluster25
532	ORC4	93.7279	99.2093	2	-0.557753		Cluster35
533	NFYA	93.7279	92.2941	2	1.06094		Cluster23
534	STAG1	93.7102	81.0361	2	1.69157		Cluster13
535	EIF2S2	93.6984	86.8303	3	1.09292		Cluster14
536	ITGA1	93.6866	89.7923	2	1.18125
537	CRK	93.6748	97.3802	11	0.28443		Cluster25
538	CDC6	93.663	90.8249	4	0.790448		Cluster35
539	PSMC5	93.6512	94.1586	5	0.574867
540	POLR2C	93.6394	93.7574	9	0.47184		Cluster26
541	DVL1	93.6276	86.7241	2	1.33565
542	PPP2CB	93.6158	91.055	4	0.774874		Cluster36
543	ULK2	93.604	90.878	3	0.904124
544	ABI2	93.5922	88.8364	2	1.22086
545	BLM	93.5804	81.7088	1	3.34523	CLIP	Cluster4
546	RAD17	93.5686	83.1603	2	1.51921
547	EXOSC10	93.5568	91.6096	3	0.863225		Cluster10
548	CCT8	93.545	87.7154	2	1.2718		Cluster36
549	CACNA1G	93.5332	80.1038	2	1.70921
550	DOK1	93.5214	80.2809	3	1.40809
551	HNRNPF	93.5096	92.1879	9	0.520318		Cluster26
552	GTF3C3	93.4978	86.7477	3	1.07186		Cluster33
553	RCC2	93.486	86.4114	4	0.955225
554	RPL3	93.4742	78.0033	4	1.36728
555	MTMR2	93.4624	97.2976	1	1.33792		Cluster3
556	PHTF1	93.4506	85.3434	2	1.38445
557	RFC2	93.4388	85.8036	2	1.35798		Cluster35
558	IGHMBP2	93.427	88.4824	2	1.2165
559	RPLP0	93.4152	78.2747	4	1.34933		Cluster14
560	SMAD7	93.4034	92.9549	4	0.67268
561	SEC13	93.3916	96.0231	9	0.341502		Cluster18
562	FBXW11	93.3798	82.5584	2	1.51985	CLIP	Cluster8
563	DCTN2	93.3679	93.1909	6	0.541712		Cluster27
564	PPP1CC	93.3561	94.3238	7	0.459512		Cluster18
565	PPP2R3A	93.3443	76.2214	2	1.99605	CLIP	Cluster36
566	ARHGEF7	93.3325	85.19	2	1.36426	CLIP	Cluster25
567	POLR3C	93.3207	90.2761	3	0.893103
568	TRAPPC10	93.3089	88.8659	1	1.85249
569	CDT1	93.2971	81.3547	2	1.58745
570	RIMS1	93.2794	96.6604	3	0.613386		Cluster6
571	YES1	93.2794	96.0585	6	0.407523		Cluster25
572	DYRK1A	93.2617	85.2962	2	1.35513
573	TCF4	93.2499	89.8749	3	0.905245
574	SREBF1	93.2381	82.7295	3	1.23887		Cluster31
575	CENPA	93.2263	88.7302	4	0.833854		Cluster18
576	KEAP1	93.2145	82.0628	1	2.76299		Cluster17
577	NINL	93.2027	84.5055	4	1.01205
578	CDK19	93.1909	94.1232	7	0.450574
579	USO1	93.1791	89.4501	2	1.12928		Cluster7
580	SYK	93.1673	94.725	5	0.503		Cluster25
581	EXOSC4	93.1555	90.2879	2	1.08446
582	HIP1	93.1437	82.4522	2	1.49021		Cluster42
583	KIF5B	93.1319	90.76	2	1.0573		Cluster2
584	NCAPG	93.1201	97.628	2	0.751786		Cluster13
585	RAE1	93.1083	97.0734	7	0.316317		Cluster28
586	ZFYVE16	93.0965	87.3141	4	0.879453		Cluster38
587	AHR	93.0847	81.6025	3	1.28087
588	GRB10	93.0729	83.0422	2	1.45719	CLIP	Cluster25
589	TAF7	93.0611	91.3972	4	0.688598
590	CEP192	93.0493	84.1043	4	1.00235		Cluster27
591	CWC22	93.0375	76.7996	5	1.26073
592	CARM1	93.0257	91.3736	5	0.611495		Cluster34
593	RASSF3	93.0139	91.7512	1	1.58321
594	TEK	93.0021	79.03	3	1.38753
595	PSMD3	92.9903	90.4886	4	0.713252
596	RRM2B	92.9726	95.3151	1	1.34953		Cluster14
597	KCNQ3	92.9726	83.3373	4	1.01559		Cluster12
598	VAV2	92.9549	87.7744	3	0.941066		Cluster25
599	NCBP1	92.9431	95.5688	14	0.257269		Cluster26
600	BARD1	92.9313	91.3854	4	0.665673		Cluster4
601	MFAP1	92.9195	87.8216	6	0.681566		Cluster26
602	DYNC1I2	92.9077	89.6153	5	0.657364
603	TP53	92.8959	97.9467	22	0.14603		Cluster34
604	RPS5	92.8841	84.0689	5	0.889891		Cluster14
605	EIF3C	92.8723	74.4395	2	1.99936
606	YY1	92.8605	93.2263	4	0.588586		Cluster34
607	CENPH	92.8487	88.2523	4	0.790292		Cluster18
608	EIF4G3	92.8369	77.4723	2	1.73645		Cluster14
609	TUBGCP6	92.8251	85.0661	4	0.923961
610	ESPL1	92.8133	80.7647	1	2.67759		Cluster2
611	EFNB1	92.8015	89.4147	3	0.845993		Cluster25
612	APC2	92.7897	78.8294	1	3.17568	CLIP	Cluster24
613	POLR2G	92.7779	93.7692	9	0.331214		Cluster26
614	POLE	92.7602	78.1213	2	1.63334		Cluster35
615	CACNA1B	92.7602	80.6939	2	1.4763
616	SH3PXD2A	92.7425	94.3002	2	0.811701
617	CEP131	92.7307	88.0458	5	0.675894
618	SVIL	92.7189	87.3495	1	1.7565		Cluster20
619	ATXN7L3	92.7012	80.7293	2	1.46765
620	POLR2D	92.7012	93.722	9	0.324302		Cluster26
621	MAML1	92.6835	89.6507	4	0.681957
622	TOP3A	92.6717	83.2783	1	2.12283		Cluster4
623	PPARGC1A	92.6599	95.5157	9	0.238435		Cluster31
624	SYT2	92.6481	93.1555	2	0.84876
625	NEDD4	92.6363	85.249	2	1.20709		Cluster38
626	MLST8	92.6245	92.6127	3	0.665026
627	GNAI2	92.6127	98.8494	1	0.111211		Cluster43
628	CSTF1	92.6009	90.9901	9	0.412825		Cluster26
629	ADCY6	92.5891	98.6075	1	0.340235		Cluster39
630	NEDD4L	92.5773	84.1279	1	2.00609	CLIP	Cluster29
631	ITGA2	92.5655	84.2931	1	1.9877
632	GTF2B	92.5537	83.6677	3	1.03818
633	TAF5L	92.5419	80.7293	2	1.43731
634	ITGA6	92.5301	87.9632	3	0.855711		Cluster29
635	TJP1	92.5124	83.054	1	2.08522	CLIP	Cluster25
636	CD14	92.5124	98.7255	1	0.248664		Cluster39
637	SMAD3	92.4947	95.4331	8	0.247189		Cluster34
638	OBSCN	92.4829	78.3101	1	2.88982	CLIP	Cluster20
639	MTA2	92.4711	89.2141	3	0.792994		Cluster34
640	B9D2	92.4593	86.6061	4	0.781821
641	FBXW5	92.4475	88.4116	3	0.827208
642	PRKAR2B	92.4357	92.2233	6	0.435131		Cluster27
643	WNK2	92.4239	82.3637	1	2.14304		Cluster42
644	ACTN1	92.4121	82.0215	2	1.35221		Cluster38
645	VPS26B	92.4003	98.0057	1	1.08267
646	CRY1	92.3885	77.6611	1	3.04529
647	MYOM2	92.3767	95.8343	1	1.19515		Cluster20
648	LATS2	92.359	81.1305	1	2.27394	CLIP	Cluster29
649	DCTN5	92.359	87.4793	3	0.858711
650	VPS54	92.3413	97.5572	1	1.10224
651	CHD9	92.3236	80.3399	3	1.1761		Cluster16
652	TUBGCP3	92.3236	89.8277	5	0.569639		Cluster27
653	PRMT5	92.3059	84.0453	1	1.95662
654	PRC1	92.2941	89.2731	3	0.772565		Cluster17
655	RMI1	92.2823	80.7765	1	2.30773
656	NSL1	92.2705	87.2787	4	0.736237		Cluster18
657	RANGAP1	92.2587	93.2735	6	0.380008		Cluster18
658	REV3L	92.2469	77.3897	2	1.58199		Cluster35
659	PIK3CG	92.2351	99.6991	6	NA		Cluster25
660	MAP1S	92.2233	77.6375	1	2.85373	CLIP	Cluster25
661	C17orf49	92.2115	83.8565	2	1.21514
662	TADA2B	92.1997	80.7293	2	1.37358
663	TAF6	92.1879	92.9431	5	0.416941
664	MED1	92.1761	88.6417	1	1.55465	CLIP	Cluster31
665	GNB2L1	92.1643	99.646	6	NA		Cluster30
666	MYO18B	92.1525	82.4876	1	2.03585
667	MYO1C	92.1407	89.6389	2	0.9277		Cluster24
668	INPPL1	92.1289	77.6729	1	2.73472	CLIP	Cluster25
669	AP5Z1	92.1171	89.9339	2	0.913973
670	FBXO31	92.1053	85.7446	2	1.09667
671	SF3B5	92.0935	91.1848	9	0.343036		Cluster26
672	HERC2	92.0817	76.2568	1	3.19447	CLIP	Cluster4
673	CENPJ	92.0699	85.2372	4	0.780555
674	SYNE2	92.0581	77.012	1	2.83404		Cluster13
675	GRAP	92.0463	79.0654	2	1.43169
676	ERBB3	92.0345	83.5969	1	1.87757
677	CEP152	92.0227	83.9981	4	0.824164
678	JAK3	92.0109	89.5563	4	0.596244		Cluster25
679	MCM7	91.9991	91.4562	5	0.446265		Cluster35
680	FBXL5	91.9873	94.2766	4	0.401008		Cluster8
681	PTGER4	91.9755	98.0057	1	1.00191
682	EPHA5	91.9637	77.5077	1	2.57637
683	SMARCA5	91.946	82.8298	2	1.21417		Cluster18
684	ADRM1	91.946	81.8504	2	1.26286
685	SOCS3	91.9283	90.7482	4	0.540259
686	SMARCD3	91.9164	95.8225	6	0.2007		Cluster16
687	PAXIP1	91.9047	86.1577	2	1.03465		Cluster32
688	GSN	91.8928	77.6847	2	1.46932		Cluster38
689	NUAK1	91.881	83.2193	1	1.85902	CLIP	Cluster35
690	GNAS	91.8692	98.6901	1	0.193332		Cluster43
691	PABPC1	91.8574	84.7534	2	1.09233		Cluster14
692	ILK	91.8397	92.9195	4	0.434929		Cluster25
693	PSMD6	91.8397	89.9811	4	0.554511		Cluster9
694	HNRNPU	91.822	94.0642	11	0.145378		Cluster26
695	ERBB4	91.8102	91.0786	4	0.511031		Cluster25
696	LRPPRC	91.7984	77.8499	1	2.40328	CLIP	Cluster14
697	SDC1	91.7866	98.7137	0	2.5968		Cluster42
698	SCN2A	91.7748	94.6896	1	1.1299		Cluster12
699	CENPU	91.763	88.3526	4	0.604378		Cluster18
700	UBL7	91.7512	97.7933	1	0.974849
701	HNRNPH2	91.7394	73.4128	2	1.69539
702	H2AFX	91.7276	85.4024	2	1.03976		Cluster4
703	FBXL3	91.7158	86.8657	2	0.971828
704	TRIM24	91.6981	77.2835	2	1.4567	CLIP	Cluster34
705	PRL	91.6981	76.7229	2	1.48493
706	SIN3B	91.6804	87.6918	2	0.939343
707	STAG2	91.6686	77.6139	1	2.39578	CLIP	Cluster13
708	TRIO	91.6568	77.0356	1	2.47408	CLIP	Cluster20
709	FUS	91.645	90.7954	9	0.292682		Cluster26
710	MYBL2	91.6332	66.2615	2	2.38986
711	BCL6	91.6214	90.7718	3	0.608203
712	CTNNA2	91.6096	82.0746	3	0.965755		Cluster38
713	RAC2	91.5978	99.6224	5	NA		Cluster20
714	TIAM1	91.5801	81.7796	1	1.91973	CLIP	Cluster25
715	PHF12	91.5801	85.8862	3	0.807081
716	MED17	91.5624	94.8312	7	0.164833		Cluster31
717	SF3A3	91.5506	92.0345	9	0.234232		Cluster26
718	FEN1	91.5329	75.5605	1	2.76029		Cluster35
719	RHOD	91.5329	84.1515	1	1.7062
720	POLR2I	91.5152	93.9816	10	0.125644		Cluster26
721	SH3PXD2B	91.5034	82.051	1	1.87937	CLIP	Cluster20
722	DEPDC1	91.4916	86.0869	3	0.785458
723	FMR1	91.4739	94.0524	3	0.473083		Cluster30
724	CNTN2	91.4739	98.9615	0	1.79834		Cluster1
725	CLTB	91.4562	91.9696	3	0.549758
726	RAB3GAP2	91.4444	96.0113	1	1.02907		Cluster6
727	POLA1	91.4326	80.151	2	1.27499		Cluster35
728	RASA1	91.4208	95.7635	4	0.277377		Cluster25
729	PATZ1	91.409	82.346	1	1.82842	CLIP	Cluster29
730	POLR3F	91.3972	86.1164	3	0.775062
731	EXOSC9	91.3854	91.527	2	0.750318		Cluster10
732	NEUROD1	91.3736	90.2407	1	1.3274
733	CNTRL	91.3618	83.7444	4	0.754633
734	ZWILCH	91.35	86.4114	4	0.641914
735	DVL3	91.3382	91.1258	3	0.572471
736	PRKCA	91.3264	91.6568	2	0.730551
737	MAP2K4	91.3146	83.5143	2	1.0813
738	SMC1B	91.3028	85.1664	1	1.60209
739	JAG2	91.291	86.9011	2	0.925664
740	VCP	91.2792	81.3193	1	1.87939	CLIP	Cluster6
741	SETD1A	91.2674	74.5693	1	2.80997	CLIP	Cluster32
742	RHOBTB1	91.2556	82.7767	1	1.7494
743	UBIAD1	91.2438	82.3106	2	1.13205
744	PSMA5	91.232	91.8574	4	0.414266
745	PTPRJ	91.2202	76.2686	2	1.4468	CLIP	Cluster13
746	CACNA1I	91.2084	80.1038	2	1.24106
747	ERCC3	91.1966	86.7005	3	0.726945
748	ABL2	91.1848	83.4435	4	0.745232
749	THRA	91.173	87.7036	4	0.577755
750	STRN	91.1612	86.3111	3	0.737868		Cluster36
751	CCT4	91.1494	78.4517	1	2.10307	CLIP	Cluster36
752	VPS41	91.1376	93.8459	1	1.10078		Cluster5
753	KLHL12	91.1258	79.7616	1	1.98911		Cluster17
754	E2F6	91.114	85.6974	2	0.959619
755	SPDL1	91.1022	86.9247	4	0.596963		Cluster18
756	SPAG9	91.0904	75.8556	2	1.45048	CLIP	Cluster25
757	ARRB2	91.0786	99.0913	1	-0.247192		Cluster38
758	PKP2	91.0668	77.1477	1	2.22122		Cluster42
759	CEP290	91.055	84.6708	4	0.67671
760	TAOK1	91.0432	87.0427	4	0.58243
761	RPL18A	91.0314	78.3573	4	0.936816
762	RYR2	91.0196	80.8119	2	1.1692
763	PYGO2	91.0078	94.3946	3	0.399112
764	RRM2	90.996	97.2268	1	0.920505		Cluster14
765	RAPGEF1	90.9842	72.51	1	3.43406	CLIP	Cluster25
766	PIK3R2	90.9724	99.5044	5	NA		Cluster25
767	CCT2	90.9606	88.6122	2	0.820028		Cluster36
768	HIRA	90.9488	84.4465	1	1.58454
769	CDK6	90.937	99.0087	1	-0.144283		Cluster44
770	HSPA4	90.9252	90.7246	1	1.22492		Cluster29
771	DDX5	90.9134	87.2315	2	0.8726		Cluster26
772	SAP130	90.9016	81.6734	2	1.11387		Cluster32
773	INTS10	90.8898	85.5676	2	0.936052
774	ATAD5	90.878	87.6682	1	1.37941
775	YARS	90.8662	87.2669	1	1.40191		Cluster21
776	TGFB1	90.8544	90.1581	2	0.737413		Cluster38
777	WDR48	90.8426	88.5414	1	1.32901		Cluster4
778	VDR	90.8308	99.587	4	NA		Cluster34
779	SRRM1	90.819	91.2792	9	0.180618		Cluster26
780	GTF2H3	90.8072	83.8211	2	0.997299
781	IRF7	90.7954	71.5601	2	1.64638
782	SENP3	90.7836	83.3137	2	1.01864
783	CITED1	90.7718	65.6479	2	2.1358
784	GAPDH	90.76	86.0042	3	0.693318		Cluster42
785	RPL8	90.7482	79.1244	4	0.869696		Cluster14
786	VPS16	90.7364	93.8459	1	1.03838
787	RPIA	90.7246	97.9054	1	0.857554
788	COL11A1	90.7128	82.8534	1	1.64293
789	GTPBP1	90.6951	72.9172	1	2.78196	CLIP	Cluster10
790	GFRA1	90.6951	82.6882	3	0.837036
791	TAF2	90.6774	82.0982	2	1.06699
792	ZFPM1	90.6656	75.9028	1	2.20824
793	PSMD4	90.6538	91.0668	3	0.493951		Cluster9
794	RNGTT	90.642	76.9884	2	1.30962
795	TGM2	90.6302	98.7845	1	0		Cluster43
796	CCND3	90.6184	98.8317	1	-0.0269259		Cluster5
797	XPO5	90.6066	75.3481	1	2.27262	CLIP	Cluster28
798	RTN4R	90.5948	80.3635	1	1.77473
799	RFC3	90.583	85.3906	2	0.901607		Cluster35
800	CSNK2B	90.5712	99.1503	2	-1.09139		Cluster22
801	DARS	90.5594	96.0349	2	0.463168		Cluster21
802	GTF3A	90.5476	84.5291	3	0.728531
803	FKBP15	90.5358	93.5804	1	1.01673
804	TGFBR1	90.524	90.0873	3	0.506885
805	ACTL6A	90.5122	96.1411	5	0.0518554		Cluster16
806	ORC1	90.5004	76.8114	1	2.0592		Cluster35
807	UBN1	90.4886	85.3316	1	1.43634
808	WDR5	90.4768	95.5983	5	0.0748925		Cluster32
809	TBK1	90.465	93.3089	2	0.561562		Cluster30
810	VPS39	90.4532	89.7687	1	1.18976		Cluster5
811	HLA-DRB1	90.4355	96.3536	7	0		Cluster19
812	RFX1	90.4355	92.8723	1	1.03339
813	COPS2	90.4177	80.5995	3	0.878507
814	SRF	90.4	87.2197	3	0.600902		Cluster34
815	NDEL1	90.4	89.7333	5	0.31469		Cluster18
816	GRK5	90.3823	98.5721	0	2.52665		Cluster43
817	CACNG3	90.3705	81.1069	2	1.0544
818	CS	90.3587	95.2443	2	0.474363		Cluster28
819	PRKCE	90.341	98.5603	0	2.53921		Cluster42
820	RAF1	90.341	87.6564	2	0.773645		Cluster29
821	CDC16	90.3233	89.5445	4	0.397859		Cluster17
822	RHOQ	90.3115	94.5008	3	0.304953		Cluster20
823	PCBP1	90.2997	92.3295	9	0.0616883		Cluster26
824	MLLT1	90.2879	84.9068	1	1.43033
825	SETMAR	90.2761	74.8407	1	2.18936
826	NDE1	90.2643	93.0493	6	0.121228		Cluster27
827	RNF126	90.2525	97.7933	1	0.789946
828	CCNA2	90.2407	98.7373	0	1.91444		Cluster44
829	ODC1	90.2289	76.481	1	2.01744	CLIP	Cluster27
830	NME2	90.2171	91.5034	1	1.06904
831	NUF2	90.2053	87.857	4	0.449923		Cluster18
832	ABCD3	90.1935	94.076	2	0.500178		Cluster23
833	NFKBIA	90.1817	90.3233	4	0.345905
834	FAF2	90.1699	75.6903	1	2.06299
835	SRCAP	90.1581	67.1584	2	1.80965
836	GSK3B	90.1463	94.1114	5	0.100105		Cluster29
837	MYO3A	90.1286	79.5433	1	1.72247		Cluster24
838	BRD8	90.1286	85.6738	2	0.826704		Cluster32
839	CBX2	90.1109	76.3099	1	2.00354
840	MED23	90.0991	94.194	7	0.00310768
841	RPL18	90.0873	79.443	4	0.76569
842	NEO1	90.0755	86.8893	2	0.770346		Cluster38
843	IMMT	90.0637	86.4881	1	1.30591		Cluster35
844	HDAC9	90.0519	94.5834	5	0.0627339		Cluster34
845	PPP2R2A	90.0401	92.1053	7	0.0881107		Cluster36
846	KAT2B	90.0283	97.038	9	-0.0709027		Cluster32
847	PRPF31	90.0165	88.7892	5	0.305466		Cluster32
848	SUFU	90.0047	86.0987	2	0.788806
849	CBX4	89.9929	81.8032	2	0.965972
850	NCL	89.9752	82.2162	1	1.51035		Cluster44
851	USP47	89.9752	75.5369	1	2.02644	CLIP	Cluster8
852	PSMC3	89.9575	90.524	4	0.309625		Cluster9
853	TJP2	89.9457	77.9561	1	1.80079
854	MYO1E	89.928	70.2974	1	2.78689		Cluster42
855	TTF1	89.928	75.8202	1	1.99531		Cluster32
856	TOP2A	89.9044	72.3153	1	2.36323		Cluster16
857	ABCA7	89.9044	96.4362	1	0.798042
858	SMG7	89.8867	76.0916	4	0.876461
859	BAHD1	89.8749	79.8855	1	1.65181
860	CAD	89.8631	69.6601	1	2.89388	CLIP	Cluster25
861	EEF1A1	89.8513	91.5506	3	0.369858		Cluster35
862	DYNC1I1	89.8395	81.697	2	0.95151
863	NEDD9	89.8277	71.9849	1	2.37963		Cluster38
864	EPC1	89.8159	85.9334	2	0.773647
865	TAF5	89.8041	85.9452	3	0.581847
866	UBTF	89.7923	72.7401	2	1.38351		Cluster33
867	LIG4	89.7805	77.5667	1	1.79666	CLIP	Cluster35
868	DIS3	89.7687	79.0182	1	1.6892	CLIP	Cluster10
869	ERC1	89.7569	82.3932	1	1.47118		Cluster6
870	FANCE	89.7451	85.2844	2	0.790187
871	PPARGC1B	89.7333	86.1931	2	0.754534
872	TTL	89.7215	78.1685	1	1.73464
873	HRAS	89.7038	90.465	3	0.396006		Cluster25
874	KLHL22	89.7038	75.7494	1	1.93509
875	ATIC	89.6861	72.0911	1	2.31568		Cluster39
876	TBL1X	89.6743	79.856	2	1.01534		Cluster17
877	AGL	89.6625	80.4284	2	0.985909		Cluster45
878	CNOT8	89.6507	97.7696	3	0.0752047		Cluster23
879	POLL	89.633	81.1777	2	0.950465
880	ITSN1	89.633	85.1546	2	0.785191		Cluster25
881	LRP2	89.6153	98.5249	0	2.29793		Cluster39
882	WWC1	89.6035	80.7883	1	1.54236
883	TCP1	89.5917	75.1121	1	1.96019	CLIP	Cluster36
884	PXN	89.5799	96.3772	8	-0.0693813		Cluster25
885	ZNF335	89.5681	88.4706	1	1.12253
886	TGFBR2	89.5563	89.1669	3	0.429698
887	PTPRF	89.5445	80.033	1	1.58557	CLIP	Cluster36
888	FANCI	89.5327	69.8371	1	2.62327	CLIP	Cluster4
889	CASC3	89.5209	83.5497	5	0.463943
890	UBA52	89.5091	97.4392	13	-0.178114		Cluster14
891	BMPR2	89.4973	85.898	2	0.736152
892	ACTA2	89.4855	69.6483	1	2.61531
893	FGFR1	89.4737	88.3408	1	1.11638		Cluster25
894	CATSPERD	89.4619	78.9002	2	1.02839
895	EGF	89.4442	92.9903	5	0.0596868		Cluster25
896	PSMC4	89.4442	88.565	3	0.438799
897	DMAP1	89.4265	87.0663	2	0.679187
898	SNRPA	89.4147	90.7836	9	0.0107656		Cluster26
899	ATRIP	89.397	88.0222	4	0.348166		Cluster35
900	PSMB2	89.397	91.0314	4	0.22359
901	VASP	89.3793	77.3543	1	1.72309
902	MYO6	89.3675	95.2797	4	0.0350834		Cluster24
903	TP53BP2	89.3557	72.6103	1	2.12969		Cluster15
904	HTRA2	89.3439	93.545	2	0.419004
905	EIF3E	89.3262	79.6554	3	0.777999		Cluster14
906	PPP1R12A	89.3262	88.9603	3	0.414212
907	PARD3	89.3085	78.4163	1	1.64475		Cluster42
908	PPARG	89.2967	93.2853	7	0		Cluster34
909	KIRREL	89.2849	99.3628	4	NA		Cluster38
910	NR4A1	89.2731	81.933	2	0.882469
911	PTPRZ1	89.2613	75.9618	1	1.80894	CLIP	Cluster25
912	DKC1	89.2495	81.4373	3	0.692041		Cluster40
913	SGK1	89.2377	91.9519	4	0.169673
914	DAB2	89.2259	70.5924	1	2.34085
915	CTTN	89.2141	96.7548	8	-0.115347		Cluster25
916	SMARCE1	89.1964	97.6752	8	-0.155655		Cluster16
917	IPO5	89.1964	69.0111	1	2.59075	CLIP	Cluster28
918	SYCE2	89.1787	72.215	1	2.11643
919	RPS6KA6	89.1669	74.0087	1	1.95207
920	ITGAV	89.1492	87.8452	1	1.10203		Cluster25
921	NRCAM	89.1492	94.4536	4	0.0438019		Cluster12
922	CDCA8	89.1315	87.0309	4	0.359147
923	TNIK	89.1197	77.0238	1	1.69794		Cluster42
924	PPP3CB	89.1079	80.2455	2	0.935378
925	EPHB2	89.0961	82.7	1	1.3589		Cluster25
926	WRN	89.0843	77.5549	2	1.04677
927	ING2	89.0725	89.3321	3	0.379603		Cluster34
928	VAV1	89.0607	88.8128	2	0.580256		Cluster25
929	MEF2D	89.0489	84.0276	3	0.58077
930	EIF3D	89.0371	74.2802	2	1.19929		Cluster14
931	RTN4RL1	89.0253	83.8034	1	1.2947
932	RPS16	89.0135	83.9863	5	0.389862		Cluster14
933	MGA	89.0017	75.5015	1	1.76857	CLIP	Cluster32
934	SP1	88.984	96.5188	8	-0.131698		Cluster34
935	PSMC6	88.984	91.6332	4	0.146995
936	TNKS2	88.9663	82.5466	1	1.34537	CLIP	Cluster4
937	MAP3K3	88.9544	82.1808	2	0.829638
938	UBA2	88.9426	83.3727	1	1.30203		Cluster44
939	ETF1	88.9308	76.6108	4	0.739792
940	BUD31	88.919	74.6047	3	0.939242		Cluster26
941	DDX24	88.9072	69.4949	1	2.36549		Cluster45
942	CHERP	88.8954	78.3691	1	1.56893
943	LHX9	88.8836	80.4579	2	0.898736
944	BMP2	88.8718	80.5051	1	1.44157
945	AP1S1	88.86	97.569	8	-0.187166		Cluster19
946	CNOT7	88.8482	97.215	2	0.208238		Cluster23
947	TCF20	88.8364	67.8782	1	2.63376	CLIP	Cluster35
948	CLIP2	88.8246	60.9629	2	2.03731	CLIP	Cluster18
949	CXXC1	88.8128	92.3177	3	0.219916
950	CGNL1	88.801	70.262	1	2.20787
951	RNF2	88.7892	92.4711	4	0.0922376		Cluster32
952	ILF2	88.7774	93.3916	4	0.0463625		Cluster35
953	RNF4	88.7656	94.017	2	0.336568
954	CASK	88.7538	99.1031	0	1.01477		Cluster38
955	KIF26A	88.742	67.418	1	2.7137	CLIP	Cluster27
956	SLK	88.7302	79.9504	1	1.45328		Cluster44
957	EFNA1	88.7184	84.659	3	0.523881
958	DLGAP1	88.7066	69.5185	1	2.29178
959	EIF4A3	88.6948	82.4994	5	0.409257		Cluster14
960	PRKD1	88.683	86.9719	2	0.603474		Cluster29
961	XRCC3	88.6712	74.6637	1	1.76753
962	KIAA0368	88.6535	68.7869	1	2.37106	CLIP	Cluster9
963	ZNF45	88.6535	76.186	1	1.67798
964	ITCH	88.6358	89.8513	2	0.49926
965	NGDN	88.624	89.6861	1	0.948435
966	ITGB5	88.6122	75.5723	1	1.70367		Cluster38
967	VCL	88.6004	78.4635	1	1.50893		Cluster38
968	EXOC2	88.5886	82.11	1	1.31861		Cluster42
969	GLE1	88.5768	87.1017	2	0.592629
970	CACHD1	88.565	79.9976	2	0.885664
971	POLR3GL	88.5532	85.8449	3	0.460524
972	CENPN	88.5414	88.2523	4	0.246173		Cluster18
973	NIFK	88.5296	78.6996	2	0.930663		Cluster37
974	RPL7A	88.5178	78.5461	4	0.617093		Cluster14
975	MCCC2	88.506	69.3415	1	2.22223
976	SKIL	88.4942	82.2044	2	0.778994
977	ETS2	88.4824	65.5299	2	1.60202
978	EXOSC3	88.4706	90.0047	2	0.476719
979	SORBS3	88.4588	69.3297	1	2.21319
980	KANSL1	88.447	82.5997	2	0.761584
981	SMURF1	88.4352	81.0243	1	1.35667
982	TRIM33	88.4234	86.2757	2	0.609002
983	POLR2L	88.4116	95.9759	12	-0.219891		Cluster33
984	FEZ1	88.3998	84.3639	2	0.679171
985	EIF4B	88.388	85.1428	3	0.473863		Cluster14
986	RPS6KA2	88.3762	75.95	1	1.63875		Cluster19
987	RHOU	88.3644	93.4506	2	0.317854		Cluster20
988	PMVK	88.3526	71.7961	1	1.94589
989	PPP4C	88.3408	89.2259	3	0.295296		Cluster36
990	MSH3	88.329	75.773	1	1.64107		Cluster4
991	A2M	88.3172	69.967	1	2.0886
992	ORC3	88.3054	82.5702	2	0.743565		Cluster35
993	NUP37	88.2936	96.4126	10	-0.245499		Cluster28
994	RPS29	88.2818	83.6323	5	0.316956		Cluster14
995	U2AF2	88.27	93.4624	9	-0.105875		Cluster26
996	FANCM	88.2582	86.0633	2	0.595258
997	LRRK2	88.2464	73.6488	1	1.7506
998	SGTA	88.2346	97.7933	1	0.564478
999	GSK3A	88.2228	83.8919	3	0.497922
1000	SDC2	88.211	99.0323	1	-0.539094		Cluster38
1001	PLEKHM2	88.1992	67.0758	1	2.42048	CLIP	Cluster30
1002	SMURF2	88.1874	77.6493	1	1.48407
1003	SUPT16H	88.1756	73.3892	1	1.74797		Cluster33
1004	AKAP6	88.1638	65.6597	1	2.70136	CLIP	Cluster11
1005	TXNL4A	88.152	91.6686	9	-0.0628566		Cluster26
1006	AMOT	88.1402	81.5081	1	1.27649		Cluster24
1007	MIS12	88.1284	93.0021	6	-0.0351484		Cluster18
1008	CHRM4	88.1166	63.6653	1	3.73244
1009	FBXO6	88.1048	85.7446	2	0.587625
1010	EPS15	88.093	92.0817	2	0.337563		Cluster19
1011	FBXO2	88.0812	85.7446	2	0.584948
1012	TGIF1	88.0694	72.1619	1	1.82577
1013	PSMD9	88.0576	87.3023	3	0.333283
1014	DCP1B	88.0458	84.9894	1	1.08283
1015	COPZ1	88.034	96.9849	6	-0.195425		Cluster19
1016	KMT2D	88.0222	64.5032	1	2.92755	CLIP	Cluster32
1017	PRKCQ	88.0104	66.6509	1	2.40916
1018	RASSF1	87.9986	92.4475	3	0.12012
1019	IGF2BP1	87.9868	67.595	1	2.27183	CLIP	Cluster3
1020	GNA14	87.9691	98.6665	1	-0.131057		Cluster43
1021	AKAP13	87.9691	65.7777	1	2.54578	CLIP	Cluster29
1022	PTEN	87.9514	90.8898	3	0.183112		Cluster25
1023	SH3GL2	87.9396	92.6835	2	0.297004		Cluster19
1024	TKT	87.9278	70.2384	1	1.97542
1025	HNRNPL	87.916	91.0432	9	-0.0592447		Cluster26
1026	CEP55	87.9042	73.4836	2	1.07527
1027	CLIC1	87.8924	67.5714	1	2.23759
1028	CACNA1H	87.8806	67.3	1	2.28328	CLIP	Cluster11
1029	ATXN1L	87.8688	95.1971	1	0.627642		Cluster34
1030	PPP2CA	87.857	94.9965	6	-0.130474		Cluster36
1031	FXR1	87.8452	92.3885	2	0.301897		Cluster30
1032	HNRNPK	87.8334	94.6424	10	-0.22008		Cluster26
1033	DNAJC2	87.8216	97.6044	1	0.533294		Cluster14
1034	GHR	87.8098	72.2799	1	1.76533
1035	MED21	87.798	95.0083	7	-0.175272		Cluster31
1036	SENP1	87.7862	87.3377	2	0.502696		Cluster28
1037	FANCA	87.7744	88.3172	2	0.465172		Cluster4
1038	MYH11	87.7567	68.1968	1	2.12196
1039	OFD1	87.7567	86.3347	5	0.150433
1040	TIPIN	87.739	79.089	2	0.823949
1041	HDAC8	87.7272	85.7918	3	0.371052
1042	ERCC8	87.7154	74.5811	1	1.60796
1043	NGF	87.7036	97.4156	10	-0.35418		Cluster25
1044	KLHL13	87.6918	75.9382	1	1.50846
1045	ATL1	87.68	97.097	1	0.53565		Cluster13
1046	OCRL	87.6623	69.5362	1	1.97163	CLIP	Cluster7
1047	EPHB1	87.6623	81.7324	2	0.696933
1048	E2F1	87.6446	89.4737	4	0.0892586		Cluster34
1049	GTF3C5	87.6328	85.5499	3	0.365328
1050	ITGA4	87.621	74.6519	1	1.57903
1051	NUP50	87.6092	96.6958	7	-0.264631		Cluster28
1052	RGMA	87.5974	70.734	1	1.84553	CLIP	Cluster25
1053	SHMT2	87.5797	93.9108	1	0.653207
1054	TRIM39	87.5797	75.7257	1	1.50002
1055	CLDN10	87.562	71.7135	1	1.75849
1056	CNOT10	87.5502	96.8846	2	0.0745605		Cluster23
1057	LCK	87.5384	97.1206	9	-0.343374		Cluster25
1058	PTPN1	87.5266	92.2351	5	-0.0184416		Cluster25
1059	PACSIN1	87.5148	69.9198	1	1.89989
1060	CDC45	87.5029	83.6913	2	0.60614		Cluster35
1061	SNRPC	87.4911	72.8464	1	1.66944
1062	CABLES1	87.4793	63.984	1	2.68717
1063	FBXW7	87.4675	90.1227	2	0.352021
1064	CDK8	87.4557	95.2915	7	-0.215979		Cluster31
1065	MAPKAP1	87.4439	72.5926	1	1.67438
1066	LEPR	87.4321	69.6955	2	1.1867
1067	PSMB7	87.4203	88.506	3	0.213022
1068	INSIG1	87.4085	86.9955	2	0.470983		Cluster23
1069	MED9	87.3967	94.0288	7	-0.185019
1070	UBE4B	87.379	69.9906	1	1.83256	CLIP	Cluster9
1071	ERCC4	87.379	70.2502	1	1.8146
1072	FZD2	87.3613	63.0989	1	2.7638		Cluster39
1073	APBB1	87.3495	72.811	1	1.6317		Cluster42
1074	B2M	87.3377	93.1673	5	-0.0801455		Cluster19
1075	CEBPZ	87.3259	69.1055	1	1.89925		Cluster45
1076	USP11	87.3141	68.6689	1	1.93729		Cluster44
1077	E2F5	87.3023	70.4626	2	1.12901
1078	TCF7L1	87.2905	63.3054	1	2.67771
1079	PIAS3	87.2787	78.6287	4	0.482521
1080	NUP35	87.2669	96.6781	7	-0.307697		Cluster28
1081	UBAP2L	87.2551	68.3266	1	1.96006	CLIP	Cluster15
1082	SFI1	87.2433	84.2813	4	0.251413
1083	MAGED1	87.2315	66.9047	1	2.08537	CLIP	Cluster29
1084	EIF5B	87.2197	69.4831	1	1.84072		Cluster14
1085	RBM15	87.2079	76.6344	1	1.38808
1086	C3orf58	87.1961	96.9849	6	-0.293665		Cluster19
1087	SMAD2	87.1843	97.3566	10	-0.428922		Cluster34
1088	PACS1	87.1725	70.4744	1	1.75326		Cluster19
1089	KTI12	87.1607	71.7607	1	1.66904
1090	PRICKLE1	87.1489	66.9814	1	2.06572	CLIP	Cluster17
1091	SPC25	87.1312	86.4114	4	0.151563
1092	ERCC2	87.1312	84.6236	2	0.534507
1093	WDR77	87.1135	84.1751	1	1.00119
1094	DTNB	87.1017	86.7359	1	0.891455
1095	STARD9	87.0899	97.6398	1	0.438155		Cluster2
1096	ARAP3	87.0781	71.1942	1	1.69287
1097	CNOT3	87.0604	96.8846	2	0.00857966		Cluster23
1098	INTS2	87.0604	84.7711	1	0.967608
1099	HNRNPR	87.0427	91.9873	10	-0.201788		Cluster26
1100	ZBTB17	87.0309	78.3455	2	0.764328
1101	NCR1	87.0191	93.6748	3	0		Cluster16
1102	SMO	87.0073	86.6415	2	0.435375		Cluster42
1103	RICTOR	86.9955	80.5759	1	1.15779		Cluster29
1104	TNC	86.9837	74.0382	1	1.4946
1105	SUGP1	86.9719	91.2084	9	-0.159015		Cluster26
1106	MLH1	86.9601	91.1612	2	0.250548		Cluster4
1107	NFE2L2	86.9483	84.8596	2	0.505043
1108	GBA	86.9365	77.2481	1	1.32419
1109	SPATA13	86.9247	76.5577	1	1.35795		Cluster39
1110	SORBS1	86.9129	85.6266	4	0.164117
1111	TPPP	86.9011	75.0885	1	1.43554
1112	RPA3	86.8893	91.114	3	0.0414666		Cluster35
1113	CEP41	86.8775	83.7444	4	0.231954
1114	RPL4	86.8657	79.6318	4	0.397026
1115	CNTN1	86.848	95.1027	3	-0.0246898		Cluster12
1116	MACF1	86.848	62.9219	1	2.5086	CLIP	Cluster23
1117	PAFAH1B1	86.8303	95.3859	7	-0.296361		Cluster27
1118	CEP135	86.8185	83.7444	4	0.227366
1119	PSMA4	86.8067	92.6599	4	-0.0426278		Cluster9
1120	EXOSC7	86.7949	90.1109	2	0.276821
1121	SF3A2	86.7831	97.1088	12	-0.470912		Cluster26
1122	TDRD3	86.7713	82.9891	1	1.00706		Cluster40
1123	CKAP4	86.7536	80.6231	1	1.11388
1124	AGGF1	86.7536	85.6384	1	0.892108
1125	EIF3I	86.7359	74.8289	2	0.873172
1126	PTPN13	86.7241	61.9188	1	2.63104	CLIP	Cluster23
1127	DRD2	86.7123	98.6193	1	-0.265443		Cluster39
1128	THBS2	86.7005	73.5544	1	1.47305
1129	SLIT2	86.6828	76.9766	3	0.584255		Cluster38
1130	USP22	86.6828	71.8433	1	1.57588	CLIP	Cluster32
1131	TICRR	86.6651	65.3764	1	2.08615		Cluster44
1132	PPP1R10	86.6533	78.7822	2	0.695752
1133	CRNKL1	86.6415	82.6764	5	0.170398		Cluster26
1134	UBL4A	86.6297	97.2032	1	0.408909
1135	FBXL15	86.6179	85.7446	2	0.429553
1136	DYSF	86.6061	78.5343	1	1.20866		Cluster42
1137	NTN1	86.5943	86.5707	2	0.396117
1138	PALLD	86.5825	81.5789	1	1.05628		Cluster24
1139	PSMB8	86.5648	89.7569	4	0
1140	PKP4	86.5648	75.4897	1	1.35963		Cluster42
1141	GTF2F2	86.5471	93.4034	9	-0.290767		Cluster26
1142	PTPN6	86.5353	89.7451	4	0
1143	RHOB	86.5235	85.2667	1	0.89538
1144	GINS2	86.5117	69.4182	1	1.71183
1145	MAPRE1	86.4999	94.666	8	-0.329683		Cluster27
1146	RRP8	86.4881	79.8855	1	1.12516
1147	PDS5B	86.4763	73.6606	1	1.44658		Cluster41
1148	STK3	86.4645	88.0576	3	0.131847		Cluster36
1149	PAK6	86.4527	63.7715	1	2.20962
1150	SMAD6	86.4409	77.7791	1	1.22498
1151	SETD7	86.4291	72.1501	1	1.51556
1152	TOM1	86.4173	69.5657	1	1.68789
1153	CISH	86.4055	66.4031	1	1.94482
1154	JAG1	86.3937	87.8098	2	0.32808		Cluster30
1155	NELL2	86.3819	77.5785	1	1.22782		Cluster45
1156	RBPJ	86.3701	94.2058	4	-0.135728
1157	ANAPC2	86.3583	79.266	1	1.12952
1158	PINK1	86.3465	83.4199	1	0.94025
1159	PDPK1	86.3347	76.127	1	1.29823
1160	SNIP1	86.3229	81.9684	4	0.244001
1161	SCML2	86.3111	76.3099	1	1.27793
1162	RPL27	86.2993	77.7378	4	0.405082		Cluster14
1163	KDM5B	86.2875	64.1964	1	2.09128	CLIP	Cluster34
1164	MYO9B	86.2757	79.5433	1	1.10644		Cluster24
1165	PTPN12	86.2639	81.4727	2	0.558497
1166	IRF2BPL	86.2521	68.4801	1	1.71369	CLIP	Cluster10
1167	CSK	86.2403	83.1131	3	0.30296
1168	FBLN5	86.2285	72.8582	1	1.44675
1169	DDX58	86.2167	71.5719	1	1.5086
1170	MED4	86.2049	94.7014	7	-0.344777		Cluster31
1171	ARID4A	86.1931	68.6276	2	1.07585
1172	CD2BP2	86.1813	92.5301	10	-0.322323		Cluster26
1173	GRB2	86.1636	97.8523	18	-0.598454		Cluster25
1174	MYCN	86.1636	65.0932	1	2.00379
1175	AMPH	86.1459	73.2004	1	1.42169		Cluster42
1176	ROCK2	86.1341	72.5749	1	1.45476		Cluster3
1177	SYNCRIP	86.1223	77.2363	3	0.53092
1178	CDC40	86.1105	92.6481	9	-0.307881		Cluster26
1179	PPIL1	86.0987	64.7392	2	1.26805		Cluster41
1180	ISL2	86.0869	58.4966	1	3.46726
1181	DNM1L	86.0751	97.3684	2	-0.0127583		Cluster28
1182	PRKCI	86.0633	98.9379	1	-0.649214		Cluster42
1183	ARL2	86.0515	89.0489	1	0.673229
1184	PIP5K1C	86.0397	71.625	1	1.48317
1185	KLF16	86.0279	59.4465	1	2.82868
1186	STAT6	86.016	90.0755	6	-0.132271
1187	HSPB1	86.0042	70.793	2	0.952793
1188	TBL1XR1	85.9924	90.8426	7	-0.198692		Cluster17
1189	RHOV	85.9806	82.7767	1	0.929992
1190	PITRM1	85.9688	67.8192	1	1.7099		Cluster45
1191	HNRNPA0	85.957	91.5978	9	-0.292673		Cluster26
1192	INTS9	85.9452	84.7711	1	0.834464
1193	SKP1	85.9334	96.9436	8	-0.514906		Cluster8
1194	FANCC	85.9216	88.5296	2	0.234349		Cluster4
1195	DCTN3	85.9098	92.6009	6	-0.250671		Cluster27
1196	UPF3B	85.898	93.7338	13	-0.437333		Cluster26
1197	SHOC2	85.8862	79.8442	2	0.571988
1198	PNPT1	85.8744	88.1343	2	0.243557
1199	SMARCAD1	85.8626	75.3717	1	1.25089		Cluster4
1200	YEATS4	85.8508	92.8605	3	-0.0561863
1201	TNPO1	85.839	88.2936	2	0.22938
1202	HNRNPA1L2	85.8272	84.3521	2	0.388001		Cluster21
1203	DTL	85.8154	70.1086	1	1.50914
1204	TONSL	85.8036	64.5622	1	1.92928
1205	ADRBK1	85.7918	99.2447	2	NA		Cluster43
1206	MTA1	85.78	77.7083	2	0.636133
1207	TSSC4	85.7682	58.6972	1	2.75
1208	KIF1C	85.7564	94.2176	1	0.425742		Cluster5
1209	CKAP2	85.7446	64.1846	2	1.22266		Cluster2
1210	E2F3	85.7269	74.6873	1	1.25913
1211	NELFB	85.7269	72.9644	1	1.34574
1212	TGFBI	85.7092	83.2665	1	0.863345
1213	AGAP2	85.6974	62.3672	1	2.09008	CLIP	Cluster25
1214	RRAS	85.6856	84.6	2	0.362188		Cluster25
1215	EPC2	85.6738	70.498	1	1.47077	CLIP	Cluster5
1216	MED11	85.662	94.4772	7	-0.417363
1217	TARBP2	85.6502	81.2426	1	0.939349
1218	EBF1	85.6384	97.2622	2	-0.0717316		Cluster34
1219	RPS6KA3	85.6266	81.6616	1	0.920344
1220	ING5	85.6148	96.2001	2	-0.0346377		Cluster5
1221	SPRY2	85.603	76.599	1	1.13962
1222	RBBP5	85.5912	95.4567	6	-0.428633		Cluster32
1223	SRSF4	85.5794	93.0257	10	-0.432158		Cluster26
1224	MORF4L1	85.5676	96.2591	9	-0.573143		Cluster34
1225	XRCC4	85.5558	87.621	2	0.221315
1226	FST	85.544	69.7545	1	1.48161
1227	GAB1	85.5322	79.4194	2	0.545277
1228	PSMA3	85.5145	93.3207	5	-0.294922		Cluster9
1229	CDH3	85.5145	62.0722	1	2.068
1230	EGFR	85.4968	97.451	12	-0.689206		Cluster25
1231	TCERG1	85.485	71.8964	2	0.829247
1232	ITPR2	85.4732	61.0928	1	2.15726
1233	NFASC	85.4614	96.4834	5	-0.444642		Cluster12
1234	NLK	85.4496	83.2547	2	0.384936
1235	FKBP8	85.4378	72.988	2	0.774476
1236	GANAB	85.426	76.0326	1	1.13718		Cluster45
1237	CACNG6	85.4083	78.9002	2	0.547199
1238	ALK	85.4083	66.6037	1	1.66625
1239	LAMB3	85.3847	73.1473	1	1.28431
1240	TRPC5	85.3847	81.815	2	0.429923
1241	CTDNEP1	85.367	79.5964	2	0.520548
1242	VMA21	85.3552	96.9849	6	-0.54062		Cluster19
1243	CACNB1	85.3434	80.1038	2	0.500587
1244	MVK	85.3316	70.9818	1	1.38728
1245	ABCD1	85.3198	89.4973	1	0.566802		Cluster23
1246	FANCB	85.308	84.6944	2	0.312277
1247	CUL4B	85.2962	69.9316	1	1.438		Cluster8
1248	CNTN4	85.2844	98.0765	1	0.207282
1249	RPS6KC1	85.2667	87.8334	1	0.62221
1250	EPHA8	85.2667	97.6988	1	0.221455
1251	THRB	85.249	83.8742	3	0.141849
1252	RBM14	85.2372	86.3465	2	0.231978
1253	PSMD13	85.2254	90.1699	4	-0.122932
1254	PLXNB2	85.2136	98.3007	0	1.79126	CLIP	Cluster20
1255	STUB1	85.2018	84.3875	2	0.307048		Cluster44
1256	E2F2	85.1841	72.7991	1	1.26962
1257	TRAF2	85.1841	82.464	1	0.827248
1258	POLR2K	85.1664	68.067	2	0.94702
1259	PSMD12	85.1546	90.5476	4	-0.145368
1260	RPS6KB1	85.1428	97.1914	9	-0.683148		Cluster29
1261	TRERF1	85.131	67.0168	2	0.991766
1262	UNC5B	85.1192	89.5681	2	0.0798714
1263	GPANK1	85.1074	80.9535	1	0.884102
1264	NCK1	85.0956	95.085	4	-0.346546		Cluster25
1265	EIF4A2	85.0838	77.1182	2	0.573528		Cluster14
1266	WIPI1	85.072	98.0765	1	0.172232
1267	GDI2	85.0602	82.7118	1	0.796742
1268	USP10	85.0484	63.8718	1	1.76559		Cluster45
1269	ARHGAP6	85.0366	78.5992	1	0.960399		Cluster24
1270	DAG1	85.0248	75.1593	1	1.1193		Cluster42
1271	NUP85	85.013	96.4598	10	-0.705129		Cluster28
1272	ATR	85.0012	77.4487	1	1.01252		Cluster4
1273	KLF4	84.9894	74.7699	3	0.474317
1274	MCL1	84.9776	94.43	3	-0.210589		Cluster29
1275	CRKL	84.9658	92.3767	5	-0.33405
1276	CNOT6	84.954	96.8846	2	-0.135725		Cluster23
1277	TAX1BP1	84.9422	98.4777	0	1.35885		Cluster39
1278	ATP5J2	84.9304	64.0902	2	1.09005		Cluster45
1279	YWHAH	84.9127	92.713	5	-0.351394
1280	YEATS2	84.9127	80.4815	1	0.87445		Cluster32
1281	WDR82	84.895	90.3941	4	-0.177852		Cluster36
1282	SETD2	84.8832	58.9922	1	2.18821	CLIP	Cluster32
1283	CPSF7	84.8714	91.8928	9	-0.454126		Cluster26
1284	CDC25C	84.8596	77.9797	1	0.96672
1285	PLXND1	84.8478	98.2181	0	2.06606		Cluster1
1286	CSTF2	84.836	90.9724	9	-0.423782		Cluster26
1287	ZFP36L1	84.8242	81.4491	1	0.824432
1288	RPS19	84.8124	84.4111	5	-0.0360544		Cluster14
1289	LIG3	84.8006	72.0203	1	1.24565		Cluster35
1290	BRAF	84.7888	88.8659	2	0.0660115		Cluster29
1291	LMNB1	84.7711	77.1654	1	0.992212
1292	PCCB	84.7711	73.8494	1	1.1407
1293	SIRT6	84.7534	61.6474	1	1.90585
1294	DDX42	84.7416	65.7423	2	0.996159		Cluster26
1295	CUL4A	84.7298	81.8268	2	0.353636
1296	CASP3	84.718	98.8199	0	0.85405		Cluster44
1297	PHF5A	84.7062	91.468	9	-0.454773		Cluster26
1298	DOCK7	84.6944	62.2787	1	1.82248		Cluster42
1299	RAD23A	84.6826	96.2237	4	-0.450272		Cluster9
1300	S1PR1	84.6708	98.1945	0	2.07645		Cluster39
1301	NCALD	84.659	97.3212	7	-0.710773		Cluster19
1302	PDGFB	84.6472	83.0068	2	0.294679
1303	PARN	84.6354	80.3281	1	0.851964
1304	MEF2A	84.6236	79.1834	1	0.891424
1305	CDC25A	84.6118	77.4605	1	0.957119
1306	RBM10	84.6	71.8551	1	1.21968		Cluster26
1307	SNRPD3	84.5882	93.0139	9	-0.551591		Cluster26
1308	DHX16	84.5764	61.9778	1	1.81973		Cluster41
1309	RBX1	84.5645	95.7517	6	-0.59012		Cluster8
1310	AMFR	84.5528	79.4784	1	0.864813
1311	EIF4EBP1	84.5409	88.6004	5	-0.222308
1312	DLL1	84.5291	87.1371	2	0.105126		Cluster9
1313	RPS24	84.5173	84.1161	5	-0.0636876		Cluster14
1314	ARNT	84.5055	80.6467	3	0.174269
1315	ETV5	84.4937	61.6592	1	1.81479
1316	GPC3	84.4819	60.7741	1	1.89578		Cluster39
1317	EIF3G	84.4701	74.2802	2	0.599196
1318	YWHAQ	84.4583	93.8872	5	-0.468663		Cluster29
1319	EIF4G2	84.4465	61.9306	1	1.76447	CLIP	Cluster14
1320	HMGA1	84.4347	65.8485	1	1.4968		Cluster44
1321	NCK2	84.4229	89.9221	3	-0.108019		Cluster25
1322	CREB3L4	84.4111	98.0057	1	0.0797752
1323	URI1	84.3993	64.7628	1	1.5611		Cluster41
1324	RRM1	84.3875	53.2924	1	3.03802	CLIP	Cluster14
1325	IL27RA	84.3757	60.6915	1	1.85889
1326	TUBA1A	84.3639	86.8126	2	0.0919471		Cluster34
1327	ELL	84.3521	73.0706	1	1.10977
1328	COPS3	84.3403	64.4442	1	1.57744
1329	TRPC4AP	84.3285	69.7309	1	1.27659		Cluster8
1330	DCTN4	84.3167	87.4793	3	-0.0292678
1331	AGMAT	84.3049	89.0784	3	-0.0889766
1332	YWHAE	84.2931	95.9169	9	-0.761557		Cluster27
1333	TCF3	84.2813	75.9146	3	0.335256
1334	MED22	84.2695	94.4772	7	-0.620894
1335	LGALS3	84.2577	66.7689	1	1.43169
1336	DCAF6	84.24	67.2292	1	1.402
1337	MED25	84.24	69.9552	1	1.25383
1338	PPP1CB	84.2223	90.4059	4	-0.256816
1339	SLU7	84.2105	67.5242	1	1.37779		Cluster41
1340	CNOT4	84.1928	96.1883	2	-0.195919		Cluster23
1341	AFAP1L1	84.1928	86.8421	1	0.532878
1342	NANOS1	84.1751	87.9514	1	0.490189
1343	DAB2IP	84.1633	57.7	1	2.08867		Cluster39
1344	EIF4EBP3	84.1515	75	2	0.547199		Cluster14
1345	SRSF2	84.1397	92.0581	9	-0.571566		Cluster26
1346	STAM	84.1279	86.6533	3	-0.0178793
1347	OCLN	84.1161	86.2167	2	0.0944897
1348	RPS3	84.1043	88.8954	7	-0.37265		Cluster14
1349	ACTC1	84.0925	79.8088	1	0.799764		Cluster24
1350	STAT4	84.0807	62.0368	1	1.70276
1351	SOX9	84.0689	64.8808	1	1.50697		Cluster44
1352	PPP2R5C	84.0571	79.561	2	0.360307
1353	FLCN	84.0394	97.9349	2	-0.289567		Cluster29
1354	SNRNP70	84.0394	91.1376	9	-0.545475		Cluster26
1355	RHEB	84.0217	79.8206	2	0.337694
1356	ARF6	84.0099	84.0571	2	0.164291
1357	SF3B6	83.9981	92.0935	10	-0.629918		Cluster26
1358	BIRC5	83.9863	92.9313	4	-0.406758		Cluster18
1359	LRP6	83.9745	75.4425	1	0.953382		Cluster42
1360	PPIE	83.9627	71.5011	1	1.13037
1361	POLR3D	83.9509	86.4763	3	-0.0367741
1362	RPLP1	83.9391	77.7378	4	0.101976		Cluster14
1363	BCL9	83.9273	66.2851	1	1.4015	CLIP	Cluster31
1364	NUP43	83.9155	96.4126	10	-0.92557		Cluster28
1365	FAF1	83.9037	72.9762	1	1.04562		Cluster39
1366	CENPO	83.8919	88.2523	4	-0.209503		Cluster18
1367	CLSTN1	83.8801	73.8022	1	1.00328
1368	CENPC	83.8683	87.1843	4	-0.183524		Cluster18
1369	SAP18	83.8565	92.2705	4	-0.403045		Cluster34
1370	BDP1	83.8447	67.9018	1	1.29373		Cluster33
1371	AKT2	83.8329	92.6717	3	-0.294224		Cluster24
1372	RPL12	83.8211	78.6701	4	0.0325203		Cluster14
1373	CDK13	83.8093	98.3774	0	1.29299		Cluster44
1374	YBX1	83.7975	93.9698	10	-0.780262		Cluster26
1375	TELO2	83.7857	73.5249	2	0.546836
1376	LATS1	83.7739	83.0894	1	0.609812
1377	CSTF3	83.7621	91.2674	9	-0.606102		Cluster26
1378	TBKBP1	83.7503	82.936	1	0.609602
1379	PLCB3	83.7385	95.6809	0	2.29986		Cluster43
1380	CENPM	83.7267	86.4114	4	-0.183209
1381	GNAL	83.7149	73.5957	1	0.976801
1382	FZD1	83.7031	63.4411	1	1.48969
1383	WDTC1	83.6913	59.9481	1	1.72263		Cluster45
1384	PMS2	83.6795	84.7888	1	0.532855
1385	MCMBP	83.6677	64.7274	1	1.4126		Cluster35
1386	CACNB3	83.6559	80.1038	2	0.263587
1387	AP5M1	83.6441	89.3675	2	-0.018911
1388	RNF41	83.6323	80.5877	1	0.675323
1389	AP3M2	83.6205	89.3675	2	-0.026619
1390	CNOT2	83.6087	96.8846	2	-0.330082		Cluster23
1391	TBP	83.5969	94.5362	6	-0.725589		Cluster33
1392	SH2D3C	83.5851	57.9537	1	1.84539
1393	WDHD1	83.5674	68.8046	1	1.16352		Cluster35
1394	KMT2E	83.5674	68.6276	1	1.18002
1395	DERL1	83.5497	77.9443	1	0.773502
1396	AMER1	83.5379	68.3089	1	1.2005		Cluster8
1397	RBBP6	83.5202	62.1666	1	1.53551		Cluster41
1398	TPM2	83.5202	71.9377	1	1.0226
1399	DUSP6	83.5025	80.9653	1	0.649594
1400	KAT8	83.4907	84.7416	2	0.0435147
1401	TOB1	83.4789	84.836	2	0.0398543
1402	HTATSF1	83.4671	54.2719	1	2.16988		Cluster41
1403	PYGO1	83.4553	95.3977	1	0.0593208		Cluster31
1404	PLRG1	83.4435	79.3132	5	-0.0250892		Cluster26
1405	CDK9	83.4317	92.0227	3	-0.33469		Cluster33
1406	MED30	83.4199	94.5952	7	-0.794801
1407	CSNK1E	83.4081	90.8662	6	-0.550392
1408	PPP6R1	83.3963	57.9006	1	1.8153		Cluster45
1409	CD44	83.3845	94.7722	4	-0.593379		Cluster3
1410	DAZL	83.3727	99.4218	1	NA		Cluster5
1411	CLTA	83.3609	91.9696	3	-0.340772
1412	CDK14	83.3491	98.4305	0	1.10897		Cluster44
1413	DNAH9	83.3373	71.029	1	1.03846
1414	TSC1	83.3255	79.0536	2	0.264952
1415	RAN	83.3137	97.8641	11	-1.17447		Cluster28
1416	GON4L	83.3019	58.0481	1	1.78573		Cluster44
1417	PSMB4	83.2901	91.173	4	-0.435446
1418	ORC6	83.2783	81.2013	2	0.17268
1419	C1D	83.2665	89.6625	3	-0.248128
1420	CEP70	83.2547	83.7444	4	-0.129138
1421	GATA2	83.237	75.6077	1	0.843313
1422	RPS6	83.237	87.2433	6	-0.409098		Cluster14
1423	PDS5A	83.2193	74.1562	1	0.896133		Cluster41
1424	DEAF1	83.2075	60.1428	1	1.62073
1425	HLA-DQB1	83.1957	81.0833	1	0.613388
1426	CENPP	83.1839	88.2523	4	-0.310388		Cluster18
1427	BNIP2	83.1721	82.9478	3	-0.00360442
1428	KDM6A	83.1603	71.1824	1	1.01808
1429	EXOSC8	83.1485	89.7805	2	-0.0835799		Cluster10
1430	VCAM1	83.1367	88.624	2	-0.04379
1431	MAX	83.1249	95.0201	7	-0.880585		Cluster32
1432	FKBP1A	83.1131	76.0798	2	0.363039
1433	AGO1	83.1013	90.4768	2	-0.112295
1434	MED10	83.0836	93.4978	6	-0.736086
1435	CD4	83.0836	88.1756	1	0.326798
1436	CCDC94	83.0599	57.9419	1	1.74432
1437	RELN	83.0599	66.4739	1	1.23286
1438	KHSRP	83.0422	83.6559	1	0.504722
1439	POLR3K	83.0304	85.8449	3	-0.119738
1440	FBN1	83.0186	78.2157	1	0.708463		Cluster39
1441	CHEK1	83.0068	93.3798	4	-0.570124		Cluster4
1442	PSMC2	82.995	89.4029	3	-0.264512
1443	VEGFB	82.9832	98.3243	0	1.27029		Cluster1
1444	ABI1	82.9655	80.5169	2	0.173367
1445	TNK2	82.9655	77.5313	2	0.289056
1446	DCAF4	82.9478	67.2292	1	1.18086
1447	FDFT1	82.936	90.8072	2	-0.137373		Cluster23
1448	NUP54	82.9242	96.6781	7	-1.03362		Cluster28
1449	E2F4	82.9124	81.5435	2	0.123741
1450	FRS3	82.9006	78.2865	2	0.253911
1451	CDK12	82.8888	98.4541	0	1.05137		Cluster44
1452	TOP1	82.877	98.4659	0	1.04735		Cluster41
1453	HDAC7	82.8652	81.7678	4	-0.0921603
1454	RBBP4	82.8534	96.4952	6	-0.971008		Cluster34
1455	ACTN4	82.8416	75.5133	1	0.806011		Cluster38
1456	CNOT11	82.8298	96.8846	2	-0.416598		Cluster23
1457	CGN	82.818	73.4246	1	0.888957
1458	SQLE	82.8062	71.4421	1	0.96307		Cluster23
1459	FZD5	82.7944	69.6129	1	1.04057
1460	CASP6	82.7826	94.9611	1	0.00422553		Cluster44
1461	MAP3K1	82.7708	64.1315	1	1.31601		Cluster39
1462	VANGL2	82.759	97.9703	2	-0.4696		Cluster28
1463	GP1BB	82.7472	63.6417	1	1.34333
1464	AAR2	82.7354	62.7449	2	0.855552
1465	MAP3K10	82.7236	72.5513	1	0.9067
1466	TDRD7	82.7118	60.3906	1	1.50509
1467	SDCCAG8	82.7	83.7444	4	-0.188869
1468	EIF4E	82.6882	92.4121	6	-0.733344		Cluster14
1469	CENPQ	82.6764	88.2523	4	-0.381842		Cluster18
1470	DLST	82.6646	90.2171	1	0.191141
1471	GTF2E1	82.6528	73.4364	1	0.858176
1472	YWHAB	82.641	95.6455	6	-0.959483		Cluster29
1473	MATN2	82.6292	87.5797	1	0.29375
1474	CDK16	82.6174	68.9757	1	1.0374
1475	PHF1	82.6056	93.899	2	-0.307305		Cluster15
1476	KHDRBS1	82.5938	83.1367	2	0.008212
1477	MED27	82.582	93.4211	6	-0.81282
1478	TDP1	82.5702	74.2565	1	0.813843
1479	AZIN1	82.5584	89.5091	1	0.208715
1480	RHO	82.5407	99.292	1	NA		Cluster5
1481	HLA-DPB1	82.5407	81.4963	1	0.532878
1482	USF1	82.523	88.3054	4	-0.403322
1483	TLE2	82.5112	79.3014	1	0.605156
1484	EPN1	82.4994	78.4281	1	0.636273
1485	PRDX1	82.4876	63.9249	1	1.28896		Cluster39
1486	EEF2K	82.4758	77.2717	1	0.67894
1487	DCLRE1C	82.464	86.2403	2	-0.0237471
1488	SUPT20H	82.4522	80.7293	2	0.102038
1489	DCAF10	82.4404	67.2292	1	1.10804
1490	XBP1	82.4286	98.2063	0	1.51995		Cluster39
1491	STAT5A	82.4168	79.7734	1	0.583054
1492	S100A4	82.405	82.3814	2	0.0225279
1493	PSMD14	82.3932	90.1817	4	-0.493004
1494	TAF12	82.3814	86.8775	3	-0.223684
1495	KDM5A	82.3696	56.9684	1	1.68809	CLIP	Cluster34
1496	CTCF	82.3578	64.9634	1	1.21747		Cluster44
1497	BMI1	82.346	82.4758	2	0.00829256
1498	GOLPH3	82.3342	98.0057	1	-0.072093
1499	RPS13	82.3224	88.447	7	-0.614176		Cluster14
1500	XPC	82.3047	70.7458	1	0.93349
1501	EPHA6	82.3047	80.1747	1	0.559357
1502	CACNA1D	82.287	80.2219	2	0.108173
1503	SPG7	82.2693	92.5065	1	0.0536242
1504	MED31	82.2693	93.6158	6	-0.875033
1505	YBX3	82.2516	70.557	1	0.936315
1506	NPAT	82.2398	62.6623	1	1.31862
1507	EFNA2	82.228	71.3536	1	0.903358
1508	PHC2	82.2103	76.894	1	0.672915
1509	SNX4	82.2103	69.5775	1	0.966147
1510	VHL	82.1926	90.3823	2	-0.196865		Cluster35
1511	BBS10	82.1808	75.3127	1	0.734862
1512	NXF1	82.169	84.8714	4	-0.285189
1513	MEAF6	82.1572	97.4038	5	-1.08379		Cluster5
1514	TNFAIP1	82.1454	76.5164	1	0.679219
1515	STAU1	82.1336	72.7165	2	0.393084		Cluster40
1516	TRIP6	82.1218	74.9233	1	0.748566
1517	DYRK2	82.11	90.642	1	0.122704
1518	H3F3B	82.0982	96.625	5	-1.04281		Cluster32
1519	EDC3	82.0864	85.426	1	0.33203
1520	NEK9	82.0746	86.0219	1	0.309127		Cluster45
1521	HEY2	82.0628	64.4796	1	1.20414
1522	CREB3	82.051	63.9072	1	1.22969
1523	POLR3E	82.0392	86.1164	3	-0.233308
1524	ACTL6B	82.0274	93.7456	3	-0.582467		Cluster16
1525	PAK4	82.0097	78.7114	1	0.581344
1526	PCDH11X	82.0097	59.3698	1	1.46885
1527	INTS3	81.992	83.9155	1	0.383538
1528	EZH2	81.9802	86.1459	1	0.286774
1529	YWHAG	81.9684	94.6778	8	-1.1009		Cluster27
1530	POT1	81.9566	78.2983	1	0.58893
1531	GIGYF2	81.9448	72.4392	1	0.822352
1532	ATP5A1	81.933	58.9568	1	1.47817		Cluster45
1533	GRIP1	81.9212	66.4621	1	1.07542		Cluster44
1534	MBD2	81.9094	74.4041	2	0.291142
1535	MED6	81.8976	94.9847	7	-1.09657		Cluster31
1536	RFWD2	81.8858	68.4683	1	0.966591		Cluster45
1537	SNRPB2	81.874	90.6833	9	-0.896857		Cluster26
1538	SRSF9	81.8622	91.232	9	-0.934515		Cluster26
1539	CCNC	81.8504	94.0878	6	-0.994218
1540	ZYX	81.8386	98.4895	0	0.883777		Cluster42
1541	ANAPC5	81.8268	79.5256	1	0.53456		Cluster2
1542	AJUBA	81.815	79.2188	1	0.542037		Cluster44
1543	MEN1	81.8032	78.7232	2	0.109084
1544	ZNF268	81.7914	76.186	1	0.653703
1545	DSC3	81.7796	63.6771	1	1.19882
1546	DCAF11	81.7678	67.2292	1	1.02326
1547	H2AFV	81.756	81.1541	1	0.468055
1548	NUDT21	81.7442	90.6125	9	-0.908436		Cluster26
1549	FBXO25	81.7324	86.1341	2	-0.0908955
1550	DNAJC8	81.7147	90.6833	9	-0.918648		Cluster26
1551	KDELR1	81.7147	77.2599	1	0.602196
1552	SNAP91	81.697	70.7104	1	0.864096		Cluster42
1553	NFATC4	81.6852	62.6269	1	1.23886
1554	RUFY3	81.6734	89.8631	1	0.0989135
1555	REST	81.6616	63.9485	1	1.15864
1556	GNA15	81.6498	98.9143	2	NA		Cluster43
1557	ATG16L1	81.6262	65.4295	1	1.08949
1558	TLE4	81.6262	71.7371	1	0.814149
1559	CASP9	81.6262	93.9226	4	-0.802476		Cluster30
1560	AP1M1	81.6025	87.9278	2	-0.168259
1561	CACNA1E	81.5907	78.9002	2	0.0781966
1562	EIF3L	81.5789	65.8249	1	1.06772
1563	PPP4R4	81.5671	78.7822	2	0.0805228
1564	RPS23	81.5494	83.8742	5	-0.405709		Cluster14
1565	SDC4	81.5494	98.7019	0	0.613623		Cluster42
1566	CD86	81.5317	98.8907	2	NA		Cluster38
1567	SOCS2	81.5199	72.5277	2	0.331721
1568	SKP2	81.5081	93.5096	5	-0.932276		Cluster8
1569	SNAPC4	81.4963	76.3512	1	0.615819
1570	EPHA4	81.4845	85.2018	1	0.272242
1571	BCL2L1	81.4727	78.5107	1	0.533988
1572	MAP3K7	81.4609	81.7206	1	0.401624
1573	SRSF11	81.4491	93.4211	10	-1.18959		Cluster26
1574	DNAJC16	81.4373	89.0784	3	-0.436104
1575	DOC2A	81.4255	97.156	1	-0.120785		Cluster6
1576	MAP3K11	81.4137	73.5662	1	0.710754
1577	INTS8	81.4019	84.3108	1	0.294958
1578	EXOSC5	81.3901	90.0047	2	-0.277065
1579	ADARB1	81.3783	95.9523	1	-0.0842523		Cluster28
1580	RPL36	81.3665	77.9915	4	-0.10658		Cluster14
1581	GPC1	81.3547	80.8709	3	-0.106602		Cluster38
1582	GRM4	81.3429	63.3585	1	1.14968
1583	MAF1	81.3311	62.8039	1	1.17799
1584	DLD	81.3193	89.2023	1	0.0811165
1585	PSMF1	81.3075	87.1607	3	-0.371543
1586	DCAF5	81.2957	67.2292	1	0.961625
1587	JTB	81.2839	98.0057	1	-0.176539
1588	HNRNPD	81.2721	92.8251	10	-1.17501		Cluster26
1589	GPKOW	81.2603	66.1848	2	0.550987
1590	PDCD4	81.2485	66.5683	1	0.989946
1591	PPP1R14A	81.2367	98.8494	2	NA		Cluster42
1592	SENP2	81.219	71.1234	1	0.792167
1593	RPS7	81.219	86.2285	6	-0.603662		Cluster14
1594	SGIP1	81.2013	97.51	8	-1.59845		Cluster19
1595	DNAH7	81.1895	67.7484	1	0.935067
1596	PRKAR2A	81.1777	91.3028	2	-0.35864		Cluster27
1597	ENC1	81.1659	57.2221	1	1.45504	CLIP	Cluster17
1598	TECPR1	81.1541	72.929	1	0.699262
1599	XRN1	81.1423	85.2667	1	0.223031		Cluster10
1600	EPS15L1	81.1305	79.5138	1	0.454926
1601	DDB2	81.1187	72.0085	2	0.296864
1602	DNAH5	81.1069	59.7829	1	1.3097
1603	APTX	81.0951	85.3552	3	-0.318692
1604	BCAP31	81.0774	63.0753	1	1.12417
1605	RAD23B	81.0774	92.4003	3	-0.644493
1606	TOLLIP	81.0597	74.8879	1	0.621658
1607	DET1	81.042	59.1338	1	1.3383
1608	CEP350	81.042	51.7347	1	1.79901		Cluster45
1609	MLLT3	81.0243	90.3469	2	-0.335547
1610	STAT5B	81.0066	80.8591	1	0.395988		Cluster5
1611	ACTA1	81.0066	86.0219	2	-0.159108		Cluster24
1612	PCBP2	80.9889	92.4593	10	-1.20056		Cluster26
1613	TACC2	80.9771	58.178	1	1.3825		Cluster45
1614	KCNJ12	80.9653	95.5688	0	1.61345		Cluster39
1615	SART3	80.9535	63.6535	1	1.088		Cluster41
1616	PSMA2	80.9417	94.8667	6	-1.20625		Cluster9
1617	CCNY	80.9299	98.3774	0	0.898991		Cluster44
1618	TSG101	80.9181	74.1444	1	0.635298
1619	SAP30	80.9004	92.8369	4	-0.857807		Cluster34
1620	SDAD1	80.9004	71.9495	1	0.722298
1621	SUCO	80.8827	94.3356	1	-0.0686682
1622	MYLK2	80.8709	70.8048	1	0.77005
1623	NBN	80.8591	83.3491	2	-0.0724838
1624	CEP63	80.8473	84.7062	4	-0.43156
1625	TFDP1	80.8355	86.7831	4	-0.532784
1626	NSFL1C	80.8237	73.0116	1	0.676132
1627	GNPTG	80.8119	98.0765	1	-0.21403
1628	SPC24	80.8001	86.5825	4	-0.52492
1629	DES	80.7883	79.9268	2	0
1630	PSMA7	80.7765	89.1551	3	-0.515324
1631	PRMT2	80.7647	73.3538	2	0.218252
1632	MAPK12	80.7529	83.5851	3	-0.272868		Cluster38
1633	AP1G2	80.7352	97.4628	8	-1.78835		Cluster19
1634	SIK2	80.7352	59.2754	1	1.30578		Cluster42
1635	PHF21A	80.7175	88.034	3	-0.462184
1636	CHCHD3	80.7057	96.2709	1	-0.156498		Cluster35
1637	CETN2	80.6939	91.3382	6	-0.993067
1638	RBM5	80.6821	92.0463	9	-1.18113		Cluster26
1639	SNRPD2	80.6703	93.2027	9	-1.29014		Cluster26
1640	NPHP4	80.6585	79.5846	1	0.410533
1641	FGFR1OP	80.6467	85.0484	4	-0.465447
1642	EPHA3	80.629	82.4404	1	0.295631		Cluster25
1643	BUB3	80.629	89.5917	4	-0.691862		Cluster18
1644	NCBP2	80.6113	94.8076	13	-1.62651		Cluster26
1645	ATN1	80.5995	71.4893	1	0.719153
1646	EYA2	80.5877	80.5405	1	0.37654
1647	CACNG8	80.5759	81.1069	2	-0.0115176
1648	NCAM1	80.5641	94.9493	5	-1.18705		Cluster11
1649	FOXG1	80.5523	86.8126	2	-0.223359
1650	GIPC1	80.5405	98.9497	0	0.272996		Cluster1
1651	TLK2	80.5287	69.0819	1	0.810633
1652	MTMR12	80.5169	95.8461	0	1.51945		Cluster39
1653	MAFK	80.5051	80.3989	1	0.371276
1654	MICB	80.4933	81.4845	2	-0.0357877
1655	FHL2	80.4815	88.7774	3	-0.531344
1656	DUSP3	80.4697	69.4595	2	0.34282
1657	ZNF830	80.4579	77.189	2	0.02434
1658	CPEB3	80.4402	87.916	1	0.0529884
1659	TRIM27	80.4402	73.1768	1	0.63499
1660	C1QBP	80.4225	66.5329	1	0.909974
1661	RPS8	80.4107	83.0186	5	-0.488038		Cluster14
1662	RPL5	80.3989	83.1721	4	-0.413224		Cluster14
1663	BAIAP2	80.3871	76.6698	1	0.50534
1664	AXL	80.3753	54.0359	1	1.54155		Cluster39
1665	CATSPER3	80.3635	78.9002	2	0
1666	ANAPC10	80.3517	78.0269	1	0.448153
1667	RBCK1	80.3399	92.5419	1	-0.044938
1668	RPS9	80.3281	84.6354	5	-0.578967		Cluster14
1669	UBE2S	80.3163	76.2332	1	0.511584
1670	HNRNPA1	80.3045	93.4742	4	-1.00025		Cluster21
1671	ABHD16A	80.2927	83.4907	2	-0.124564
1672	GDI1	80.2809	83.4081	1	0.22159
1673	DDX20	80.2691	70.1912	1	0.735112
1674	KCNJ4	80.2573	93.9993	0	1.61708
1675	CRYZ	80.2455	74.9587	1	0.554641
1676	YWHAZ	80.2337	94.3828	5	-1.19461		Cluster29
1677	PPP3CA	80.2219	81.4255	2	-0.0577617
1678	SNAPC2	80.2101	76.3512	1	0.501816
1679	EIF2AK2	80.1983	83.9391	1	0.193311		Cluster30
1680	FBXL7	80.1865	85.7446	2	-0.216533
1681	RPL35A	80.1688	78.3219	4	-0.233279		Cluster14
1682	MAPK8	80.1688	95.2207	3	-0.955674		Cluster21
1683	PRDM2	80.151	61.2462	1	1.11017
1684	PARK2	80.1274	99.1267	1	NA		Cluster21
1685	CREB1	80.1274	92.1407	4	-0.937072		Cluster29
1686	MAPKAPK2	80.1274	75.2773	1	0.532062
1687	FMO1	80.0979	87.5797	1	0.0225279
1688	IKZF1	80.0979	72.4569	2	0.186356
1689	PPP6R2	80.0802	57.9006	1	1.29103
1690	MAPK3	80.0684	81.4137	1	0.280008
1691	NUPL2	80.0566	96.566	7	-1.83369		Cluster28
1692	NOP58	80.0448	84.9658	2	-0.203011		Cluster37
1693	TERF1	80.033	94.8194	4	-1.12139		Cluster4
1694	UBE2C	80.0212	78.1567	1	0.40109
1695	FANCF	80.0035	84.2577	2	-0.18554
1696	KIF3A	80.0035	81.0125	2	-0.0644181		Cluster17
1697	ZWINT	79.9858	92.8487	6	-1.21348		Cluster18
1698	WDR18	79.974	67.713	1	0.8101
1699	NPHS1	79.9622	99.1149	1	NA		Cluster38
1700	HUS1	79.9504	82.1218	2	-0.103336
1701	TUFM	79.9327	62.1784	1	1.0434
1702	EEF1E1	79.9327	95.616	2	-0.718882		Cluster21
1703	NGLY1	79.915	74.6165	1	0.537252
1704	PMS1	79.9032	83.3845	1	0.186843
1705	GNG2	79.8914	98.7491	1	-1.82315		Cluster43
1706	APEX1	79.8796	71.1116	2	0.218511		Cluster44
1707	SRSF3	79.8678	91.5152	9	-1.32184		Cluster26
1708	IL6ST	79.856	71.3004	2	0.207969
1709	BRIP1	79.8442	72.6457	1	0.597331
1710	SOX4	79.8324	67.9726	2	0.338063		Cluster42
1711	PDGFRA	79.8206	73.7196	1	0.557263
1712	SNRPF	79.8088	92.772	9	-1.48148		Cluster26
1713	CPNE3	79.797	62.2787	1	1.02396
1714	UBQLN1	79.7852	98.5839	0	0.574557		Cluster43
1715	ABCB8	79.7734	96.8079	1	-0.271281
1716	SNRNP40	79.7616	90.6833	9	-1.26183		Cluster26
1717	UBE2I	79.7439	92.6245	2	-0.574882		Cluster13
1718	HNRNPA2B1	79.7439	91.9047	9	-1.40286		Cluster26
1719	AP3S1	79.7262	89.8159	2	-0.439892
1720	PIK3C2A	79.7144	53.375	1	1.47852	CLIP	Cluster31
1721	KLHL20	79.7026	77.8853	1	0.387959
1722	ARHGEF4	79.6908	72.1855	1	0.600927
1723	PPP2R5D	79.679	57.3165	1	1.26495		Cluster36
1724	SLBP	79.6672	59.3462	1	1.1517
1725	KLHL7	79.6554	75.7494	1	0.471856		Cluster17
1726	SSH1	79.6436	73.0824	1	0.562657
1727	DYRK1B	79.6318	98.1473	0	1.20666		Cluster45
1728	ESPN	79.62	78.9828	1	0.3304		Cluster24
1729	AGTR1	79.6082	98.3597	0	0.772331		Cluster42
1730	KLF10	79.5964	57.5643	1	1.22811
1731	RPS14	79.5846	84.6118	5	-0.68286		Cluster14
1732	SNRPG	79.5728	92.5183	9	-1.54506		Cluster26
1733	ING3	79.561	93.0611	4	-1.09703
1734	AP1M2	79.5492	87.1135	2	-0.353007
1735	ARNTL	79.5374	77.7673	1	0.367539
1736	PSMB10	79.5256	87.798	3	-0.602715
1737	RGMB	79.5138	76.2096	1	0.422122
1738	DCC	79.502	85.2254	1	0.0471949		Cluster25
1739	HMGCR	79.4902	74.8997	1	0.474402		Cluster23
1740	JUNB	79.4784	68.7515	1	0.688873
1741	UBASH3B	79.4666	69.4359	1	0.668238
1742	ARHGDIG	79.4548	83.6441	1	0.117786
1743	CDK7	79.443	89.7156	3	-0.728042
1744	SRSF1	79.4312	91.8102	9	-1.52579		Cluster26
1745	PAX3	79.4194	70.9346	1	0.604503
1746	CBFA2T3	79.4076	66.9342	1	0.769521
1747	IFT88	79.3958	96.6014	1	-0.322196		Cluster28
1748	RPL38	79.384	78.0741	4	-0.328456		Cluster14
1749	DCPS	79.3722	85.0956	1	0.0301305
1750	ORC2	79.3604	87.6328	4	-0.78524		Cluster35
1751	ICK	79.3486	67.6068	1	0.725186
1752	RPS20	79.3368	88.093	7	-1.08971		Cluster14
1753	FANCL	79.3191	84.2577	2	-0.273702
1754	REL	79.3191	69.5362	1	0.640832
1755	NOTCH4	79.3014	83.6087	2	-0.24505
1756	TRAPPC1	79.2896	90.4413	1	-0.0809739
1757	PSMC1	79.2719	90.9488	4	-1.03535
1758	TRAP1	79.2719	60.9157	1	1.00385		Cluster41
1759	SNX6	79.2542	79.7852	2	-0.101395
1760	ARVCF	79.2424	70.6986	1	0.595168		Cluster42
1761	PPP1R12C	79.2306	85.4614	1	0.00438211		Cluster35
1762	UNC5C	79.2188	73.755	1	0.483803
1763	CACNG1	79.207	78.9002	2	-0.0761862
1764	RPS6KA5	79.1952	82.0864	1	0.14689
1765	CBFA2T2	79.1834	70.144	2	0.16821
1766	JMY	79.1716	64.7805	2	0.387332
1767	DCAF12	79.1598	67.2292	1	0.725027
1768	MUC1	79.148	79.4548	3	-0.283903
1769	USP2	79.1362	76.3866	1	0.376051
1770	IGHG1	79.1244	99.0677	1	NA		Cluster1
1771	DTNA	79.1126	85.2136	1	0.00236845
1772	PSMA6	79.1008	89.9575	3	-0.797747
1773	FTSJ1	79.089	97.8759	1	-0.417622
1774	TM7SF2	79.0772	71.4421	1	0.55154
1775	LSM3	79.0654	69.1527	1	0.631615		Cluster41
1776	RTN1	79.0536	93.781	1	-0.232503		Cluster13
1777	H3F3A	79.0418	97.0852	5	-3.15902		Cluster32
1778	COPS5	79.03	83.3963	2	-0.269974		Cluster14
1779	U2AF1	79.0182	92.5891	9	-1.86624		Cluster26
1780	NELFA	79.0064	72.0616	1	0.522257
1781	SOCS1	78.9887	81.9094	1	0.130905
1782	STK36	78.9887	94.9729	1	-0.292273		Cluster17
1783	SRSF7	78.971	91.0196	9	-1.59558		Cluster26
1784	EMD	78.9592	66.7453	1	0.719818
1785	UBAP2	78.9474	76.0326	1	0.362793
1786	SRSF6	78.9356	91.4385	9	-1.68473		Cluster26
1787	SNRPA1	78.9179	92.7425	9	-1.98725		Cluster26
1788	ATP5G2	78.9179	57.8357	1	1.10855
1789	GTF3C6	78.9002	77.0002	2	-0.0406268
1790	SRSF5	78.8884	91.7158	9	-1.76291		Cluster26
1791	DEPTOR	78.8766	95.1145	3	-1.19428		Cluster29
1792	SDC3	78.8648	98.5957	0	0.420467		Cluster42
1793	APPL1	78.853	79.2542	1	0.218006
1794	CDC7	78.8412	82.818	2	-0.267785		Cluster35
1795	ATP1A3	78.8294	75.5251	1	0.366986		Cluster39
1796	APPBP2	78.8176	79.8324	1	0.192236
1797	RFC4	78.8058	85.4909	2	-0.39344		Cluster35
1798	SYVN1	78.794	77.5903	1	0.275663
1799	RIPK1	78.7822	81.2721	1	0.127407
1800	RAD9A	78.7704	87.7862	2	-0.49302		Cluster35
1801	PSMD11	78.7586	90.2289	4	-1.07961
1802	AZIN2	78.7468	87.3967	1	-0.028439
1803	DNMT3B	78.7291	81.2957	1	0.122716
1804	FZR1	78.7291	74.9351	1	0.382629
1805	PSME3	78.7114	88.0694	3	-0.751836
1806	EDNRA	78.6996	98.5367	1	-1.57797		Cluster43
1807	EIF4H	78.6878	79.915	3	-0.361079		Cluster14
1808	IGKC	78.676	99.0205	1	NA		Cluster1
1809	SUZ12	78.6582	81.8858	1	0.0924547
1810	USP4	78.6582	57.4935	1	1.09285		Cluster45
1811	BRD4	78.6405	66.2497	1	0.706213		Cluster44
1812	SMG1	78.6287	49.3274	1	1.52367	CLIP	Cluster14
1813	NOC2L	78.6169	77.13	1	0.280593		Cluster16
1814	SYT1	78.6051	91.822	2	-0.72353
1815	CEP57	78.5933	83.9509	4	-0.699037
1816	NFYC	78.5815	92.5773	2	-0.761767		Cluster23
1817	SLC12A2	78.5697	82.2752	1	0.0622685
1818	PLAU	78.5579	76.5046	1	0.295552
1819	FANCG	78.5461	87.2079	2	-0.492006		Cluster4
1820	NDST1	78.5343	94.1704	0	1.31205
1821	RFXANK	78.5225	79.1126	1	0.189392
1822	FLOT1	78.5107	81.6262	1	0.0808064
1823	DVL2	78.4989	81.5907	2	-0.248439
1824	PSMD5	78.4871	87.1607	3	-0.737681
1825	PGR	78.4753	76.0562	2	-0.0479214
1826	RPL34	78.4635	77.8971	4	-0.427426		Cluster14
1827	PDGFRB	78.4517	85.0012	2	-0.412507
1828	STRN3	78.4399	64.2672	1	0.76226
1829	MYRIP	78.4281	70.9464	1	0.500692
1830	MYL9	78.4163	58.8506	1	0.98926
1831	AES	78.4045	81.5317	3	-0.46873		Cluster34
1832	MPG	78.3927	60.1723	1	0.931666
1833	PIAS4	78.3809	71.147	1	0.489608
1834	CBX8	78.3691	79.1362	1	0.166084
1835	DYNC2LI1	78.3573	78.1862	2	-0.142653
1836	CBX6	78.3455	77.0592	1	0.244647
1837	ASB2	78.3337	59.5587	1	0.944715
1838	PABPN1	78.3219	91.2556	9	-2.15814		Cluster26
1839	FOXO3	78.3101	80.2337	1	0.112664
1840	PIAS2	78.2983	88.801	2	-0.607943
1841	ADAR	78.2865	85.9098	0	1.76115	CLIP	Cluster28
1842	SKA3	78.2747	77.8204	2	-0.142324
1843	CATSPERB	78.2629	78.9002	2	-0.186317
1844	PIAS1	78.2511	77.1064	1	0.227736
1845	NUMB	78.2393	83.9627	2	-0.40181		Cluster38
1846	POLB	78.2275	80.9417	2	-0.267414		Cluster17
1847	POU2F1	78.2157	85.3788	3	-0.691286
1848	ELP2	78.2039	62.9337	1	0.782003
1849	AP4M1	78.1921	90.3351	2	-0.70655
1850	TMEM8A	78.1803	77.3425	1	0.216114
1851	NXT2	78.1685	71.9613	1	0.425059
1852	JUND	78.1567	65.6951	1	0.663889
1853	MBD1	78.139	93.8164	1	-0.346537
1854	IRF3	78.139	75.3835	3	-0.237634
1855	RAB6A	78.1213	95.8815	2	-1.07844		Cluster2
1856	RPL35	78.1036	78.9946	4	-0.521232		Cluster14
1857	STRIP1	78.1036	61.1754	1	0.859551		Cluster36
1858	PPP4R2	78.0859	80.0153	2	-0.228174
1859	SH3GL3	78.0741	73.165	1	0.378481
1860	ASF1B	78.0623	68.9639	1	0.538379
1861	PNPLA2	78.0505	77.1477	1	0.215926
1862	ECT2	78.0387	69.6719	1	0.504456
1863	KAT7	78.0269	73.3774	1	0.359623
1864	MYB	78.0151	90.6538	5	-1.49099
1865	POLR1C	78.0033	88.1048	4	-1.08421
1866	GIT2	77.9915	80.5287	2	-0.275162
1867	CTNNBIP1	77.9797	87.5266	4	-1.05007
1868	AP1S2	77.9679	93.1201	2	-0.920514
1869	CCND2	77.9561	98.7727	0	0.138344		Cluster5
1870	NELFCD	77.9443	77.0828	2	-0.149524
1871	RNF14	77.9325	63.1756	1	0.738759
1872	PPP5C	77.9207	54.0359	1	1.14119		Cluster45
1873	FLT3	77.9089	75.832	2	-0.103395
1874	RPL15	77.8971	77.8735	4	-0.508967
1875	NRAS	77.8853	75.9854	2	-0.111328
1876	PRKAA1	77.8735	89.2495	2	-0.69545
1877	RHOH	77.8617	82.7767	1	0
1878	CORO1A	77.8499	79.797	1	0.071905		Cluster24
1879	CTBP2	77.8381	77.2009	2	-0.164386
1880	PNKP	77.8263	85.1782	2	-0.499796
1881	CALD1	77.8145	78.139	2	-0.200249
1882	NAP1L4	77.7968	80.8827	1	0.016718
1883	DDX3Y	77.7968	90.583	1	-0.248674
1884	HDAC10	77.7791	86.6887	3	-0.840676
1885	ANAPC4	77.7673	78.139	1	0.135535
1886	SIRT2	77.7555	84.5528	1	-0.0263107
1887	SNAPC1	77.7437	77.2126	1	0.172496
1888	TAF10	77.7319	86.6769	3	-0.848606
1889	SAC3D1	77.7201	79.2424	0	2.25912
1890	IFNAR2	77.7083	73.696	2	-0.0546661
1891	TACC3	77.6965	54.8383	1	1.07909		Cluster2
1892	TM4SF1	77.6847	84.895	2	-0.502969
1893	MAPK11	77.6729	89.5327	4	-1.2512		Cluster38
1894	MECP2	77.6611	79.3958	1	0.0673119
1895	MAF	77.6434	67.8546	2	0.0752172
1896	BDNF	77.6434	85.3198	2	-0.52737
1897	ZNF143	77.6257	76.7052	1	0.184522
1898	PLCB1	77.6139	95.6809	0	1.0981		Cluster43
1899	SOX10	77.6021	98.2771	0	0.781605		Cluster39
1900	SORBS2	77.5903	62.9691	1	0.717799
1901	HAUS3	77.5785	84.9363	1	-0.0565657
1902	CDC23	77.5608	79.4076	1	0.060371
1903	RP11-544M22.13	77.5608	98.9261	1	NA		Cluster42
1904	FLT1	77.5431	98.9025	1	NA		Cluster1
1905	RND3	77.5313	79.4312	1	0.0577799
1906	KPNA1	77.5136	89.0253	1	-0.206963
1907	STAT2	77.5136	80.6821	3	-0.542724
1908	LAS1L	77.4959	82.5997	2	-0.416929
1909	HMGCS1	77.4841	71.4421	1	0.384038		Cluster23
1910	FBXO44	77.4723	85.7446	2	-0.564773
1911	TRAPPC5	77.4605	90.6302	1	-0.281871
1912	TRAIP	77.4487	70.2266	1	0.419258
1913	IFNAR1	77.4369	76.6934	2	-0.181274
1914	EIF3H	77.4251	74.9705	2	-0.110618
1915	ADAM15	77.4133	76.8468	1	0.156595		Cluster20
1916	MAPRE3	77.4015	79.0418	4	-0.616529
1917	ADCY1	77.3897	76.7229	0	2.54117	CLIP	Cluster43
1918	USP14	77.3779	71.3359	1	0.372899
1919	BAG2	77.3661	75.9736	1	0.186446
1920	GDNF	77.3543	84.3993	3	-0.753217
1921	SIAH1	77.3366	81.3665	2	-0.379056
1922	CACNG7	77.3366	80.4461	2	-0.338575
1923	PSEN1	77.3189	88.329	3	-1.01986		Cluster3
1924	TINF2	77.3071	77.4959	1	0.121565
1925	DACT1	77.2953	81.874	0	1.90723	CLIP	Cluster28
1926	CBX5	77.2835	89.0607	3	-1.0759		Cluster34
1927	RAB1A	77.2717	91.0963	2	-0.895876
1928	ASNA1	77.2599	82.4168	0	1.83604
1929	SYMPK	77.2481	59.2636	1	0.844756		Cluster41
1930	CCT6B	77.2363	75.8792	1	0.174743		Cluster36
1931	WNT5A	77.2245	66.946	1	0.528647
1932	SBF2	77.2126	85.367	0	1.61956		Cluster42
1933	RPLP2	77.2009	77.8381	4	-0.588213
1934	DGCR8	77.189	84.3403	1	-0.0750636
1935	SLC32A1	77.1772	79.2896	1	0.0129439
1936	CDC37	77.1654	73.0942	2	-0.0789986
1937	SNUPN	77.1536	68.6453	1	0.436942
1938	ANP32A	77.1418	85.957	2	-0.627457
1939	EXOSC1	77.1241	93.2381	3	-1.53655
1940	LIN9	77.1241	68.3384	1	0.453498
1941	KSR1	77.1005	74.3215	1	0.21226
1942	MKKS	77.1005	76.2804	1	0.135616
1943	LIG1	77.0828	73.9497	1	0.225663
1944	ACTN2	77.0592	87.7626	2	-0.736375		Cluster24
1945	IL5RA	77.0592	69.1291	2	0
1946	TLN1	77.0592	75.1003	0	2.69277	CLIP	Cluster25
1947	CD3D	77.0356	80.6113	1	0
1948	POLR3G	77.0238	85.8449	3	-0.918824
1949	DNAH2	77.012	68.5096	1	0.430118
1950	NFYB	77.0002	93.1083	2	-1.09271		Cluster23
1951	PPT2	76.9884	90.5122	2	-0.932558		Cluster15
1952	AIMP2	76.9766	95.4095	2	-1.30815		Cluster21
1953	MTM1	76.9648	97.8877	1	-0.719693		Cluster3
1954	GABBR1	76.953	81.5199	2	-0.443248
1955	RPL11	76.9412	81.6852	4	-0.857987		Cluster14
1956	INS-IGF2	76.9294	96.389	12	NA		Cluster14
1957	KLF11	76.9176	59.8832	1	0.7592
1958	ZMYND11	76.894	69.7781	1	0.358318
1959	NLE1	76.894	72.3035	1	0.260674
1960	CDH1	76.894	97.1796	9	NA		Cluster25
1961	MAP1LC3A	76.8704	86.5235	1	-0.202441
1962	DYNC1LI2	76.8586	81.3075	2	-0.454091
1963	KCTD10	76.8468	77.3071	1	0.0424548
1964	NOS3	76.835	89.3911	3	-1.21763		Cluster25
1965	TNXB	76.8232	82.9124	0	1.68466
1966	RPL29	76.8114	78.2275	4	-0.684154		Cluster14
1967	GNA12	76.7996	98.1827	0	0.790757		Cluster43
1968	CD151	76.7878	73.46	1	0.1992
1969	ZDHHC17	76.776	76.1624	1	0.0911183
1970	POLR2F	76.7642	95.9877	12	NA		Cluster33
1971	DCTN6	76.7524	87.4793	3	-1.09507
1972	SCN8A	76.7406	66.0019	1	0.500024		Cluster39
1973	CCNT1	76.7288	80.9181	1	-0.00654296
1974	IL6R	76.717	63.8718	1	0.574446
1975	RMI2	76.7052	68.0316	1	0.407132
1976	ATP5D	76.6934	59.0453	1	0.771068
1977	RAPGEF6	76.6757	81.9979	1	-0.0499149
1978	NME4	76.6757	92.1997	2	-1.10544		Cluster23
1979	EIF2S1	76.658	82.877	3	-0.795979		Cluster14
1980	ORC5	76.6462	81.756	2	-0.494297		Cluster35
1981	CDON	76.6344	83.5261	3	-0.848061		Cluster38
1982	NKD1	76.6226	62.9927	1	0.600722
1983	RAB35	76.6108	90.5712	1	-0.402016
1984	EXT2	76.599	97.6634	0	0.874149
1985	DBT	76.5872	81.2839	1	-0.0317781
1986	CIB1	76.5754	68.3975	1	0.384527
1987	F2RL2	76.5636	98.7963	1	NA		Cluster43
1988	DFFA	76.5518	74.5221	1	0.129352
1989	CHKA	76.54	67.4534	1	0.40997
1990	MIF4GD	76.5282	61.5884	1	0.636135
1991	PTPN2	76.5164	74.168	2	-0.201529
1992	EIF5	76.5046	68.7161	2	-0.00654422
[truncated: 6,482 more rows]

## Sheet: S4D. Ranked gene list (vNPC)
Supplmental Table S4D. Full list of ranked genes in vNPC
	Percentile			Percentil rank score of gene, which is simultaneously based on diffusion score + Number of CLIP hits + CLIP-seq value fold change
	Diffusion score			Percentile rank score of genes based on integrative network node diffsuion of CLIP targets and RNA-seq DEGs
	Number of neighbors CLIP hits			Number of direct connection to CLIP target in the network
	CLIP-seq value fold change			Normalized fold change values derieved from CLIP-seq measurement
	Hits			Identification of hits in experiments; CLIP=CLIP-seq hit, RNA=DEG from RNA-seq, CLIP&RNA =
	Cluster ID			Cluster assignment ID from network-based clustering
Rank	Gene ID	Percentile	Diffusion score	Number of neighbors CLIP hits	CLIP-seq value fold change	Hits	Cluster ID
1	EIF4G1	100	99.8702	16	3.43197	CLIP	Cluster14
2	PRKDC	99.9882	99.4749	20	3.82145	CLIP&RNA	Cluster4
3	SF3B2	99.9764	99.0677	19	3.43114	CLIP	Cluster26
4	DHX38	99.9646	99.0559	19	3.06154	CLIP	Cluster26
5	SF3B1	99.9528	99.1267	19	2.93489	CLIP	Cluster26
6	PRPF8	99.941	98.7491	18	3.85291	CLIP	Cluster26
7	CTNNB1	99.9292	99.4926	27	2.42505	CLIP	Cluster42
8	SNRNP200	99.9174	98.5426	18	3.93392	CLIP	Cluster26
9	MTOR	99.9056	99.292	16	2.46911	CLIP	Cluster29
10	AP2M1	99.8938	99.168	14	2.69742	CLIP	Cluster19
11	ERBB2	99.882	98.6311	14	3.24872	CLIP	Cluster42
12	FYN	99.8702	99.9528	35	1.70632	CLIP	Cluster25
13	RAC3	99.8584	99.646	27	2.02645		Cluster38
14	CREBBP	99.8466	99.6578	25	1.9874	CLIP	Cluster16
15	CKAP5	99.8348	98.0057	18	3.02945	CLIP	Cluster27
16	EP300	99.823	99.5634	23	2.03364	CLIP	Cluster16
17	PPP2R1A	99.8112	99.823	19	1.8981	CLIP	Cluster14
18	SF3B3	99.7994	98.1237	18	2.73436	CLIP	Cluster26
19	HSP90AA1	99.7876	99.8112	22	1.7833	CLIP&RNA	Cluster41
20	AKT1	99.7758	99.9882	50	1.47566	CLIP	Cluster42
21	NOTCH1	99.764	98.5898	10	2.93402	CLIP	Cluster8
22	ABL1	99.7522	98.5898	17	2.27709	CLIP	Cluster42
23	DHX9	99.7404	97.5808	17	2.689	CLIP	Cluster26
24	PRPF6	99.7286	98.2299	17	2.36454	CLIP	Cluster26
25	PTPN11	99.7168	98.6075	16	2.22474	CLIP	Cluster25
26	CCT7	99.705	99.41	7	2.78079	CLIP	Cluster36
27	POLR2B	99.6932	97.6752	17	2.55438	CLIP	Cluster26
28	IQGAP1	99.6814	97.5513	11	2.96186	CLIP	Cluster24
29	PARP1	99.6696	97.6516	12	2.66861	CLIP	Cluster16
30	KIFAP3	99.6578	97.9585	10	2.72663	CLIP	Cluster27
31	STRN4	99.6401	98.7019	9	2.43377	CLIP	Cluster36
32	AXIN1	99.6401	99.3451	14	1.88359		Cluster8
33	RUVBL1	99.6224	97.9939	12	2.33145		Cluster2
34	IRS1	99.6106	99.2329	16	1.81814	CLIP	Cluster25
35	ATM	99.5988	99.2447	14	1.86412	CLIP	Cluster4
36	AURKA	99.587	98.8317	18	1.86806		Cluster27
37	CDK5	99.5752	99.9292	19	1.38404		Cluster17
38	SIN3A	99.5634	97.8523	14	2.23261	CLIP	Cluster34
39	HSPA4	99.5516	99.5398	13	1.72219	CLIP	Cluster15
40	UPF1	99.5398	97.5041	9	2.89749	CLIP	Cluster14
41	AP2A1	99.528	96.6958	14	2.57915	CLIP	Cluster19
42	PRPF19	99.5162	99.4572	17	1.6433		Cluster26
43	CCT4	99.5044	99.3923	7	2.17006	CLIP	Cluster36
44	CCT6A	99.4926	99.1031	7	2.1877	CLIP	Cluster36
45	TOP2B	99.4808	96.861	9	2.87768	CLIP	Cluster16
46	SEC24C	99.469	94.8785	15	2.87017	CLIP	Cluster19
47	HNRNPUL1	99.4572	96.3299	15	2.31985	CLIP	Cluster26
48	HDAC1	99.4454	99.6932	26	1.36959		Cluster34
49	CSTF2	99.4336	95.3564	15	2.64008		Cluster26
50	PPP2R2C	99.4218	98.7963	10	1.90392		Cluster36
51	KIF3B	99.41	97.9703	10	2.11633	CLIP	Cluster27
52	SPTAN1	99.3982	96.5306	8	3.16678	CLIP	Cluster42
53	SMC3	99.3864	97.2622	9	2.45205	CLIP	Cluster27
54	NCL	99.3746	99.6106	8	1.75997		Cluster8
55	CDC5L	99.3628	99.0854	13	1.66116	CLIP	Cluster26
56	DYNC1H1	99.351	94.135	13	4.10583	CLIP&RNA	Cluster27
57	NUP133	99.3392	95.9936	18	2.16237	CLIP	Cluster18
58	CTNNA1	99.3274	94.5716	13	2.91529	CLIP	Cluster38
59	XRCC6	99.3156	97.5513	7	2.52705	CLIP	Cluster4
60	SRC	99.3038	99.9764	49	1.08014		Cluster25
61	KPNB1	99.292	95.7045	15	2.22723	CLIP	Cluster18
62	NCK1	99.2802	97.9821	11	1.88926		Cluster25
63	IGF1R	99.2683	96.9908	11	2.10527	CLIP	Cluster42
64	RUVBL2	99.2565	98.1591	14	1.73831		Cluster16
65	PRRC2A	99.2447	98.1001	5	2.60761	CLIP	Cluster13
66	SEC24D	99.2329	94.9611	15	2.34788	CLIP	Cluster19
67	KIF2C	99.2211	98.0411	15	1.68409		Cluster27
68	SMC1A	99.2093	98.9969	19	1.42818	CLIP&RNA	Cluster26
69	STAT1	99.1975	97.4038	13	1.83534	CLIP	Cluster25
70	SMARCC1	99.1857	97.746	10	1.93921	CLIP	Cluster16
71	PLK1	99.1739	99.8938	38	1.05848		Cluster27
72	RB1	99.1621	99.6224	15	1.29807	CLIP	Cluster16
73	GTF2F1	99.1503	97.0085	17	1.7639		Cluster26
74	STAG2	99.1385	96.9554	6	2.60881	CLIP	Cluster27
75	MCM2	99.1267	94.0819	10	3.03723	CLIP	Cluster35
76	SART1	99.1149	95.5747	8	2.74592	CLIP	Cluster26
77	PPP4C	99.1031	98.8553	9	1.68609		Cluster36
78	U2AF2	99.0913	98.8671	16	1.42997	CLIP	Cluster26
79	DCTN1	99.0795	95.5511	7	2.98462	CLIP	Cluster7
80	SSRP1	99.0677	94.4536	10	2.77083	CLIP	Cluster26
81	PRPF31	99.0559	95.9169	11	2.12925		Cluster26
82	KAT5	99.0441	98.0647	9	1.82631		Cluster44
83	CLASP1	99.0323	98.8907	25	1.32701	CLIP	Cluster27
84	DKC1	99.0205	98.5721	6	1.96045	CLIP	Cluster37
85	MED12	99.0087	92.6953	12	3.1668	CLIP	Cluster31
86	CDC20	98.9969	93.9226	12	2.50932	CLIP	Cluster27
87	PKN1	98.9851	94.0642	8	3.99918	CLIP	Cluster20
88	SPTBN1	98.9733	94.7368	7	3.26806	CLIP	Cluster42
89	SNW1	98.9615	98.5131	14	1.48681		Cluster26
90	CPSF3	98.9497	94.3592	14	2.24176	CLIP	Cluster26
91	DDX23	98.9379	95.1204	15	2.02405		Cluster26
92	NUP160	98.9261	95.9936	18	1.77224	CLIP	Cluster18
93	BUB1	98.9143	93.067	11	2.85993	CLIP	Cluster18
94	EZR	98.9025	98.7373	12	1.43873		Cluster24
95	PLXNA2	98.8907	96.206	6	2.54962		Cluster17
96	HIF1A	98.8789	96.6368	12	1.81318	CLIP	Cluster5
97	NCOR1	98.8671	97.9408	14	1.55123	CLIP	Cluster34
98	NUP107	98.8553	96.1647	18	1.72483	CLIP	Cluster18
99	CCT8	98.8435	99.2093	7	1.62611	CLIP	Cluster36
100	TRRAP	98.8317	93.3975	9	3.21605	CLIP	Cluster16
101	FN1	98.8199	95.1971	8	2.50386	CLIP	Cluster42
102	MYO1C	98.8081	95.7753	8	2.24133	CLIP	Cluster24
103	PIK3CA	98.7963	97.9408	12	1.55143	CLIP	Cluster25
104	JUP	98.7845	94.5834	12	2.10551	CLIP	Cluster42
105	SPTB	98.7727	94.4418	7	2.95943		Cluster1
106	XAB2	98.7609	93.5686	8	3.1884	CLIP	Cluster26
107	SF3A1	98.7491	98.5603	19	1.30224		Cluster26
108	INSR	98.7373	95.2679	10	2.12676	CLIP	Cluster25
109	SPTBN2	98.7255	93.7456	7	3.97133	CLIP	Cluster42
110	NOS3	98.7137	96.6722	9	1.91529		Cluster1
111	JAK1	98.7019	93.067	10	2.69515	CLIP	Cluster25
112	HCFC1	98.6901	92.8841	9	3.03791	CLIP	Cluster16
113	CCT2	98.6783	99.4218	8	1.42159	CLIP	Cluster36
114	JAK2	98.6665	98.3597	16	1.34073		Cluster25
115	PPP1CA	98.6547	98.5249	9	1.52972		Cluster8
116	BAZ1B	98.6429	95.9051	8	2.08736	CLIP	Cluster16
117	MCM4	98.6311	94.1822	9	2.36669	CLIP	Cluster35
118	SPTBN4	98.6193	94.2235	7	2.69262		Cluster1
119	HDAC5	98.6075	94.7486	10	2.07847	CLIP	Cluster34
120	KIF3C	98.5957	99.2211	5	1.66499		Cluster27
121	TCP1	98.5839	98.7845	7	1.55343	CLIP	Cluster36
122	MCM3	98.5721	94.725	9	2.17092	CLIP	Cluster35
123	GTPBP4	98.5603	97.6044	5	2.02081	CLIP	Cluster37
124	SF3B4	98.5485	98.6429	19	1.18048		Cluster26
125	CUL3	98.5367	96.8846	13	1.54379	CLIP	Cluster27
126	RBM22	98.5249	94.7958	8	2.19659	CLIP	Cluster26
127	CHAF1A	98.5131	97.451	8	1.67729		Cluster16
128	SMARCD1	98.5013	97.8936	9	1.55	CLIP	Cluster16
129	STAT3	98.4895	99.1385	16	1.10457	CLIP	Cluster25
130	ARID1A	98.4777	95.2325	6	2.28398	CLIP	Cluster16
131	HDAC3	98.4659	98.7727	23	1.0879		Cluster34
132	CLP1	98.4541	94.9021	15	1.69281		Cluster26
133	APC2	98.4423	91.3264	10	3.12275	CLIP	Cluster24
134	CCT5	98.4305	95.3387	7	2.11249	CLIP&RNA	Cluster36
135	SMARCB1	98.4187	97.215	10	1.54437		Cluster16
136	JUN	98.4069	99.2565	16	1.04246	RNA	Cluster8
137	PTK2	98.3951	98.9261	15	1.12473	CLIP	Cluster42
138	PRKCZ	98.3833	92.4121	7	3.16181		Cluster1
139	TOPBP1	98.3715	96.2886	10	1.66366	CLIP	Cluster4
140	CRNKL1	98.3597	99.0264	13	1.13232		Cluster26
141	HDAC6	98.3479	93.5155	8	2.3597	CLIP	Cluster34
142	VCL	98.3361	94.3002	6	2.42734	CLIP	Cluster42
143	HNRNPM	98.3243	95.97	15	1.51092	CLIP	Cluster26
144	NOC3L	98.3125	96.5837	5	2.06288	CLIP	Cluster37
145	KIF5B	98.3007	99.5752	6	1.30878	CLIP	Cluster27
146	SPHK1	98.2889	97.8936	10	1.40349		Cluster1
147	NCBP1	98.2771	99.8584	27	0.746036		Cluster26
148	TP53	98.2653	99.9646	50	0.626787		Cluster32
149	AGRN	98.2535	99.3215	2	2.66098	CLIP	Cluster11
150	RAE1	98.2417	96.7666	14	1.40247		Cluster18
151	PLCG1	98.2299	92.8369	8	2.42326	CLIP	Cluster25
152	KIF11	98.2181	99.5516	7	1.21273		Cluster27
153	DYSF	98.2063	96.8728	3	2.7981		Cluster1
154	AP2A2	98.1945	96.7076	14	1.39476		Cluster19
155	COPB1	98.1827	91.5211	10	2.55663	CLIP	Cluster19
156	RELA	98.165	98.4777	14	1.14412		Cluster7
157	ANK1	98.165	93.303	6	2.6215		Cluster1
158	DCTN2	98.1473	97.0498	12	1.37525		Cluster27
159	SOS1	98.1355	99.1857	20	0.936715		Cluster25
160	SMARCA5	98.1237	95.5216	9	1.70978	CLIP	Cluster27
161	BRCA1	98.1119	99.3628	21	0.866185		Cluster4
162	PPP2R2A	98.1001	99.6814	15	0.815957		Cluster14
163	NFX1	98.0883	94.548	14	1.57676	CLIP	Cluster26
164	ERCC6L	98.0765	89.2967	11	2.81007
165	PTPN1	98.0647	95.6573	11	1.50391		Cluster1
166	KIT	98.0529	95.6927	10	1.55007		Cluster25
167	EPHA2	98.0411	93.5155	7	2.16149	CLIP	Cluster25
168	CEP164	98.0293	95.8697	13	1.41307		Cluster27
169	ACTL6B	98.0175	96.0703	7	1.69222		Cluster16
170	SEC13	98.0057	97.2386	17	1.17426		Cluster18
171	DNM2	97.9939	93.6276	5	2.46076	CLIP	Cluster20
172	MCM7	97.9821	94.7604	9	1.71377		Cluster35
173	SMARCA2	97.9644	97.7637	10	1.27645		Cluster16
174	CUL1	97.9644	93.9108	8	1.97134	CLIP	Cluster8
175	CLTC	97.9467	91.6037	6	3.20838	CLIP	Cluster19
176	SRSF4	97.9349	98.4659	18	0.971669		Cluster26
177	SEC24A	97.9231	95.0791	16	1.41751		Cluster19
178	RBBP7	97.9113	96.5542	11	1.34686		Cluster34
179	FMR1	97.8995	99.3215	6	1.20079	RNA	Cluster41
180	SF3A3	97.8877	96.9259	17	1.15443		Cluster26
181	SREBF2	97.8759	92.8015	8	2.07614	CLIP	Cluster19
182	KIFC3	97.8641	96.8374	4	1.90755		Cluster27
183	PES1	97.8523	97.1914	5	1.63227		Cluster37
184	TPR	97.8405	90.3823	13	2.10658	CLIP	Cluster18
185	PLXNA4	97.8287	96.206	6	1.66126		Cluster17
186	CHD8	97.8169	89.7038	7	3.36328	CLIP	Cluster16
187	CHD4	97.8051	88.8954	8	3.79601	CLIP	Cluster34
188	DNMT1	97.7933	91.4208	7	2.52356	CLIP	Cluster16
189	COPA	97.7814	88.4293	10	2.83098	CLIP	Cluster19
190	EIF3B	97.7696	92.0581	5	2.75533	CLIP	Cluster43
191	CSNK1D	97.7578	97.3271	16	1.0773		Cluster27
192	EIF3F	97.746	99.9174	10	0.654106		Cluster43
193	TUBGCP3	97.7342	95.8343	14	1.2782	CLIP	Cluster27
194	IRS2	97.7224	92.3649	10	1.87868	CLIP	Cluster25
195	CENPF	97.7106	88.7066	9	2.89181	CLIP	Cluster27
196	DAXX	97.6988	93.5686	5	2.18373		Cluster2
197	GIT1	97.687	90.5594	6	2.86777	CLIP	Cluster25
198	PRPF4	97.6752	95.9346	15	1.20567		Cluster26
199	CLSPN	97.6634	91.3028	6	2.54584		Cluster35
200	VIM	97.6516	96.6486	9	1.30358	CLIP	Cluster17
201	CPSF2	97.6398	95.6042	15	1.2212		Cluster26
202	CTBP1	97.628	99.4336	14	0.721562		Cluster34
203	SYK	97.6162	94.3238	10	1.51862		Cluster25
204	NOC2L	97.6044	97.4333	6	1.35518		Cluster37
205	FLNA	97.5926	90.0637	5	4.17726	CLIP	Cluster25
206	KIF23	97.5808	98.6193	6	1.17773		Cluster27
207	CDH2	97.569	96.8138	16	1.05324	CLIP	Cluster20
208	CLASP2	97.5572	97.9231	21	0.864368		Cluster27
209	PCNA	97.5454	99.528	16	0.62128		Cluster4
210	HIP1	97.5336	98.6901	3	1.58774	CLIP	Cluster20
211	SCYL1	97.5218	87.9219	11	2.37114	CLIP	Cluster19
212	SMARCD3	97.51	96.8964	10	1.16167		Cluster16
213	NIFK	97.4982	99.7168	9	0.73069		Cluster37
214	FES	97.4864	94.312	11	1.40676		Cluster17
215	MCM5	97.4746	93.958	10	1.50539		Cluster35
216	PELP1	97.4628	93.0257	9	1.68358
217	DDB1	97.451	91.409	4	3.61439	CLIP	Cluster8
218	CLIP1	97.4392	91.9873	12	1.67636	CLIP	Cluster27
219	CAPN6	97.4274	87.4085	8	3.16908
220	SEC31A	97.4156	94.194	12	1.36054	CLIP	Cluster19
221	PTK2B	97.4038	96.0939	10	1.22812		Cluster25
222	PSMC5	97.392	92.7307	6	1.9595
223	EIF3A	97.3802	92.3885	4	2.547	CLIP	Cluster43
224	SH3KBP1	97.3684	90.0519	6	2.55283		Cluster1
225	NFKB1	97.3566	90.524	8	2.13378
226	MCM6	97.3448	88.8128	6	2.99332	CLIP	Cluster35
227	CEP131	97.333	92.4003	10	1.66739
228	HSPA8	97.3212	94.0052	5	1.84444	CLIP	Cluster33
229	MDC1	97.3094	91.5506	7	2.07684	CLIP	Cluster4
230	HNRNPK	97.2976	98.9615	20	0.635242		Cluster26
231	CTNND1	97.2858	91.291	8	2.00445	CLIP	Cluster20
232	DDX54	97.274	92.654	3	3.38089	CLIP	Cluster37
233	PDGFRB	97.2622	90.1463	7	2.25943
234	CDK5RAP2	97.2504	89.0961	8	2.33773	CLIP	Cluster27
235	TEX10	97.2386	92.1879	8	1.7923	CLIP	Cluster37
236	EGFR	97.2268	99.7758	25	0.44168		Cluster42
237	CDC6	97.215	92.3767	5	2.08433		Cluster35
238	KNTC1	97.2032	95.8874	17	1.02089		Cluster27
239	GNL2	97.1914	93.3975	4	2.10863	CLIP	Cluster37
240	SMG5	97.1796	94.0996	8	1.49226		Cluster14
241	PCBP1	97.1678	96.2709	16	0.981412		Cluster26
242	CCNB1	97.156	95.8107	9	1.23938	RNA	Cluster27
243	PARP4	97.1442	91.1258	8	1.95071	CLIP	Cluster27
244	CEBPZ	97.1324	94.4654	3	2.26723	CLIP	Cluster37
245	TLN1	97.1206	88.2346	5	3.90343	CLIP	Cluster25
246	COPG1	97.1088	87.562	11	2.15908	CLIP	Cluster19
247	RAD21	97.097	96.0703	6	1.35471	CLIP	Cluster27
248	GSPT2	97.0852	88.4824	5	3.08775	CLIP	Cluster14
249	POLA1	97.0734	96.7784	9	1.0998		Cluster30
250	ACTA1	97.0616	92.7661	10	1.49183		Cluster24
251	AP1B1	97.0498	88.0458	6	2.717	CLIP	Cluster19
252	ATL1	97.038	99.7994	1	3.00885		Cluster13
253	NDE1	97.0262	96.4185	17	0.905121		Cluster27
254	AFTPH	97.0144	91.7394	13	1.51637		Cluster19
255	HNRNPL	97.0026	95.3741	15	1.05642		Cluster26
256	STK11	96.9908	95.0909	9	1.26788
257	MFAP1	96.979	98.4423	14	0.702034		Cluster26
258	POLE	96.9672	90.3115	5	2.35156	CLIP	Cluster30
259	EXOC3	96.9554	98.3774	2	1.9161		Cluster13
260	SMG6	96.9436	89.7805	6	2.22448	CLIP	Cluster14
261	EIF4A3	96.9318	94.3474	8	1.39515		Cluster14
262	EEF2	96.92	91.704	4	2.41754	CLIP	Cluster14
263	CHD3	96.9082	86.612	7	3.20667	CLIP	Cluster34
264	SNRNP70	96.8964	94.8548	14	1.09882		Cluster26
265	SMC1B	96.8846	92.8605	5	1.83609
266	DPYSL3	96.8728	94.6542	10	1.22778	CLIP	Cluster24
267	TAF6	96.861	94.5952	11	1.1802
268	PCNT	96.8492	89.6389	9	1.9372	CLIP	Cluster27
269	COPB2	96.8374	86.8362	10	2.3156	CLIP	Cluster19
270	NCOA2	96.8256	92.5183	11	1.40536	CLIP	Cluster31
271	RANGAP1	96.8138	95.6691	13	1.00609		Cluster18
272	KDR	96.802	96.9259	11	0.922034		Cluster1
273	EIF4G2	96.7902	95.793	4	1.57259	CLIP	Cluster43
274	EIF4B	96.7784	98.3479	7	0.949461		Cluster43
275	RPA1	96.7666	88.0753	7	2.33821	CLIP	Cluster4
276	NUP188	96.7548	84.2459	10	3.21527	CLIP	Cluster18
277	UPF2	96.743	92.1525	6	1.78141	CLIP	Cluster14
278	NCOA1	96.7312	93.1083	10	1.37839	CLIP	Cluster31
279	PLRG1	96.7194	95.2089	9	1.19541		Cluster26
280	NUP153	96.7076	89.8218	13	1.63391	CLIP	Cluster18
281	YES1	96.6958	98.7609	15	0.58863		Cluster25
282	NUP205	96.684	84.2459	10	3.05459	CLIP	Cluster18
283	CDK4	96.6722	93.0906	6	1.62983		Cluster35
284	PAK1	96.6604	97.7342	8	0.951725		Cluster20
285	NDC80	96.6486	90.1699	10	1.70377		Cluster18
286	PGR	96.6368	92.7897	8	1.51039
287	TIAM1	96.625	92.0345	4	2.17273	CLIP	Cluster25
288	MAP3K5	96.6132	96.9731	6	1.14653		Cluster30
289	PPARA	96.6014	92.3531	10	1.44377		Cluster44
290	RAF1	96.5896	94.6306	7	1.33921		Cluster1
291	PIK3CD	96.5778	87.3259	6	2.66913
292	NEK2	96.566	95.5865	13	0.978248		Cluster27
293	PSMB6	96.5542	88.7184	5	2.51443
294	TUBGCP2	96.5424	91.645	9	1.62063
295	EIF4G3	96.5306	93.303	3	2.24875	CLIP	Cluster43
296	SLK	96.5188	96.4008	3	1.67969	CLIP	Cluster38
297	CDC40	96.507	98.3243	18	0.595392		Cluster26
298	VPS18	96.4952	94.5126	2	2.89563	CLIP	Cluster6
299	HNRNPU	96.4834	97.7933	18	0.640111		Cluster26
300	AMOT	96.4716	89.7333	7	1.95931	CLIP	Cluster24
301	RXRA	96.4598	95.4685	16	0.917376		Cluster31
302	SEC23A	96.448	91.9755	7	1.67139	CLIP	Cluster19
303	TAF6L	96.4362	91.8574	11	1.42949
304	MYO9B	96.4244	87.8216	6	2.41316	CLIP	Cluster24
305	BCAR1	96.4126	91.055	5	1.99544	CLIP	Cluster25
306	HNRNPF	96.4008	96.0467	16	0.837249		Cluster26
307	STRN	96.389	98.8789	9	0.675208		Cluster36
308	MYC	96.3772	97.6398	8	0.890621		Cluster44
309	CSTF1	96.3654	95.2207	15	0.935269		Cluster26
310	KIF3A	96.3536	98.0234	10	0.726782		Cluster27
311	SF3A2	96.3418	99.941	32	0.11595		Cluster26
312	KIF4A	96.3299	85.7269	7	2.82234	CLIP	Cluster27
313	INCENP	96.3182	94.4182	12	1.06461		Cluster27
314	TYRO3	96.3063	92.2115	3	2.36994	CLIP	Cluster39
315	SENP3	96.2945	87.857	6	2.29421
316	PXN	96.2827	98.4069	13	0.602088		Cluster25
317	DDX27	96.2709	97.0085	5	1.14362		Cluster37
318	DVL1	96.2591	92.9195	6	1.52162
319	MED16	96.2473	85.8272	11	2.13381
320	TERF2	96.2355	96.7253	9	0.920946		Cluster2
321	CCAR1	96.2237	96.6604	17	0.71232		Cluster26
322	CTDP1	96.2119	89.279	6	2.02155
323	ILF2	96.2001	94.8194	9	1.11712		Cluster33
324	CSNK2A1	96.1883	98.4187	11	0.619412		Cluster34
325	PSMC3	96.1765	88.5414	5	2.26352		Cluster45
326	DYNC1I2	96.1647	94.3828	11	1.06507
327	RPL3	96.1529	90.937	8	1.62132
328	MTA2	96.1411	87.4911	7	2.14547	CLIP	Cluster34
329	ERBB4	96.1293	88.3054	6	2.09606	CLIP	Cluster42
330	KDM1A	96.1175	88.3526	5	2.24582	CLIP	Cluster34
331	PSMC6	96.1057	90.4177	5	1.95366
332	CBL	96.0939	97.5218	12	0.671632		Cluster25
333	TAF7	96.0821	91.7925	10	1.38972
334	NOP2	96.0703	94.666	4	1.50741
335	PPFIA1	96.0585	91.1258	6	1.70581	CLIP	Cluster29
336	RASA1	96.0467	94.9021	9	1.0719	CLIP	Cluster25
337	DLL1	96.0349	96.566	5	1.14284		Cluster22
338	PPP2CB	96.0231	99.2802	11	0.474952		Cluster36
339	KIF15	96.0113	96.8374	4	1.24601		Cluster27
340	MACF1	95.9995	93.4742	2	2.75034	CLIP	Cluster28
341	ACTL6A	95.9877	98.9497	13	0.471631		Cluster16
342	ITGA6	95.9759	97.274	7	0.892197		Cluster1
343	CDK2	95.9641	99.705	20	0.205403		Cluster35
344	RFC4	95.9523	94.6778	9	1.06826		Cluster4
345	PARD6A	95.9405	87.5974	6	2.12506
346	USP7	95.9287	90.1109	3	2.73353	CLIP	Cluster32
347	ILF3	95.9169	93.781	6	1.31708	CLIP	Cluster26
348	CARM1	95.9051	94.5303	6	1.23293		Cluster44
349	PTPRA	95.8933	92.8251	5	1.51142	CLIP	Cluster25
350	ACTC1	95.8815	89.1138	7	1.78442		Cluster24
351	PDCD11	95.8697	89.3734	3	2.97012	CLIP	Cluster37
352	TGFB1	95.8579	94.0819	6	1.27058		Cluster1
353	NUP93	95.8461	84.4996	10	2.19471	CLIP	Cluster18
354	VCP	95.8343	87.1725	4	2.87525	CLIP	Cluster9
355	ERCC3	95.8225	94.1704	10	1.03061
356	ZW10	95.8107	95.852	17	0.694357		Cluster27
357	TRIM28	95.793	87.1902	4	2.86606	CLIP	Cluster16
358	JAK3	95.793	90.223	10	1.44702		Cluster1
359	NCK2	95.7753	93.427	8	1.21858		Cluster1
360	PTBP1	95.7635	96.3063	16	0.668359		Cluster26
361	BYSL	95.7517	89.6153	3	2.7643		Cluster37
362	AP2S1	95.7399	97.4333	14	0.582825		Cluster19
363	SMG8	95.7281	87.4498	4	2.68804		Cluster14
364	SEC24B	95.7104	91.9401	7	1.44806	CLIP	Cluster19
365	RPA2	95.7104	92.7543	9	1.221		Cluster35
366	CENPU	95.6927	94.8076	12	0.869969		Cluster18
367	ANK2	95.6809	88.1107	4	2.42941	CLIP	Cluster42
368	NR3C1	95.6691	97.8759	14	0.53997		Cluster44
369	MSH6	95.6573	87.0899	4	2.78692	CLIP	Cluster4
370	IRS4	95.6455	88.329	3	3.60821
371	ERCC2	95.6337	93.486	9	1.1459
372	EPHB2	95.6219	89.4501	5	1.92176	CLIP	Cluster25
373	SPC25	95.6101	87.6564	10	1.67864
374	ZNF217	95.5983	87.4498	7	1.94351	CLIP	Cluster34
375	NUP214	95.5865	89.2259	10	1.50977	CLIP	Cluster18
376	PBRM1	95.5747	90.9547	3	2.3012	CLIP	Cluster16
377	PSMD2	95.5629	86.081	4	3.59929	CLIP	Cluster9
378	PIK3CB	95.5511	91.1966	8	1.43264		Cluster1
379	AKAP9	95.5393	91.0786	9	1.38167	CLIP	Cluster27
380	KLC2	95.5275	98.1709	5	0.830876		Cluster27
381	TINF2	95.5157	90.6774	5	1.69326
382	NFYA	95.5039	90.1817	4	2.00193		Cluster2
383	PLXNB1	95.4921	92.6717	4	1.62174	CLIP	Cluster38
384	NCOA3	95.4803	89.6566	10	1.43007	CLIP	Cluster31
385	WDR18	95.4685	91.4916	4	1.77981
386	NAT10	95.4567	90.8072	3	2.20599	CLIP	Cluster37
387	NOTCH2	95.4449	85.9688	4	3.16939	CLIP	Cluster22
388	SKP2	95.4331	95.2797	12	0.754836		Cluster8
389	KIF18A	95.4213	95.8874	17	0.613566		Cluster27
390	MAP1B	95.4095	88.2464	3	2.83906	CLIP&RNA	Cluster39
391	KLHL21	95.3977	92.9077	11	1.00736		Cluster27
392	MSH2	95.3859	88.6358	4	2.12693	CLIP	Cluster31
393	TAF1	95.3741	87.7272	6	1.88268	CLIP	Cluster16
394	TADA3	95.3623	86.6946	5	2.20899	CLIP	Cluster16
395	MYO6	95.3505	98.3125	11	0.475065		Cluster24
396	PLXNA3	95.3387	96.2237	6	0.918893		Cluster17
397	TUBA1A	95.321	97.1206	4	1.02174	CLIP	Cluster27
398	STAG1	95.321	87.5266	5	2.01695	CLIP	Cluster26
399	MED24	95.3033	85.4614	10	1.8473	CLIP	Cluster31
400	EFNB1	95.2915	96.6073	10	0.663544		Cluster25
401	NCOR2	95.2797	86.2521	4	2.72542	CLIP	Cluster34
402	NINL	95.2679	90.4059	9	1.35302
403	SIRT1	95.2561	97.0616	8	0.69873		Cluster44
404	CAP1	95.2443	93.4506	8	1.08703		Cluster45
405	INPPL1	95.2325	87.9868	6	1.78293		Cluster1
406	SYNE2	95.2207	85.7918	4	2.87635	CLIP	Cluster33
407	FXR1	95.2089	96.7489	2	1.62021	CLIP	Cluster41
408	KIF2A	95.1971	86.3701	9	1.75277	CLIP	Cluster18
409	STUB1	95.1853	97.156	7	0.719348		Cluster44
410	TBK1	95.1735	98.7255	6	0.581772		Cluster41
411	RPF1	95.1617	95.0673	3	1.43007
412	NUP155	95.1499	84.3167	10	1.94402	CLIP	Cluster18
413	CCT6B	95.1381	97.8405	5	0.767648		Cluster36
414	MAPK14	95.1263	96.7961	9	0.646954		Cluster38
415	OCLN	95.1145	86.2344	4	2.47739
416	MTMR2	95.1027	99.6696	1	1.85899		Cluster3
417	HTT	95.0909	85.6738	4	2.65662	CLIP	Cluster17
418	SUV39H1	95.0791	92.1407	5	1.36691		Cluster34
419	MED8	95.0673	85.5676	11	1.65294
420	CHD7	95.0555	87.3023	3	2.72036	CLIP	Cluster16
421	EIF3C	95.0437	90.7718	3	1.96568
422	ACTB	95.0319	93.3325	7	1.06919	CLIP	Cluster16
423	ACTN1	95.0201	86.1931	6	1.94244		Cluster1
424	TUBG1	95.0083	92.4711	9	1.02037
425	TJP2	94.9965	89.6743	3	2.09063
426	PTPRJ	94.9847	89.1669	7	1.46047	CLIP	Cluster25
427	POLR2L	94.9729	98.6783	21	0.136586		Cluster26
428	RIPK1	94.9611	90.3705	4	1.6796
429	CDK9	94.9493	97.5926	9	0.515736		Cluster33
430	PRKAR2B	94.9375	96.6073	11	0.524595		Cluster8
431	NUP210	94.9257	84.7298	11	1.65785		Cluster18
432	CSTF3	94.9139	96.7489	16	0.417539		Cluster26
433	NOP56	94.9021	94.784	5	0.998323
434	RBM10	94.8903	85.6384	4	2.41406	CLIP	Cluster26
435	UBA52	94.8785	100	29	-0.211761		Cluster22
436	RNPS1	94.8667	98.3951	21	0.174185		Cluster26
437	FOXO1	94.8548	97.1796	9	0.534122		Cluster44
438	AURKB	94.843	99.1149	20	0.0424264		Cluster27
439	EIF3I	94.8312	91.5506	4	1.50822
440	SMARCD2	94.8194	95.7281	7	0.735186		Cluster16
441	POLR2C	94.8076	97.7047	18	0.256073		Cluster26
442	HGS	94.7958	88.801	5	1.59549
443	NUP85	94.784	96.389	19	0.385961		Cluster18
444	DDX18	94.7722	95.4154	5	0.886726		Cluster37
445	MARS	94.7604	82.6882	5	2.69413	CLIP	Cluster21
446	ITGB5	94.7486	85.3906	4	2.30785	CLIP	Cluster42
447	NELFB	94.7368	86.7477	5	1.82165
448	ASH2L	94.725	87.9219	6	1.54856		Cluster2
449	CEP192	94.7132	88.2169	8	1.37535	CLIP	Cluster27
450	EIF3D	94.7014	87.798	3	2.21638	CLIP	Cluster43
451	BUB1B	94.6896	95.3564	13	0.535845		Cluster27
452	SRRM1	94.6778	95.9523	16	0.417092		Cluster26
453	BRCA2	94.666	93.1437	5	1.10677		Cluster2
454	DPYSL2	94.6542	93.6512	7	0.89755	CLIP	Cluster17
455	SMARCC2	94.6424	84.5173	9	1.67705	CLIP&RNA	Cluster16
456	GRB2	94.6306	99.8466	29	-0.15926		Cluster25
457	VAV2	94.6188	89.279	8	1.25023		Cluster1
458	NOTCH3	94.607	83.1367	4	2.81831	CLIP	Cluster22
459	ILK	94.5952	92.6186	7	0.971922		Cluster1
460	ZWINT	94.5834	92.1289	12	0.806706		Cluster18
461	MCRS1	94.5716	88.7597	7	1.33675
462	ETF1	94.5598	92.7189	7	0.959186
463	PRC1	94.548	93.1555	10	0.751339		Cluster27
464	KIF5C	94.5362	89.0489	3	1.92593	CLIP&RNA	Cluster27
465	FUS	94.5244	95.0437	15	0.484623		Cluster26
466	DDX5	94.5126	91.6863	4	1.3771	CLIP	Cluster33
467	TUBGCP6	94.5008	90.4591	9	1.07406
468	SCAP	94.489	82.1218	5	2.61565	CLIP	Cluster19
469	TSC2	94.4772	85.6856	4	2.09641	CLIP	Cluster39
470	DAG1	94.4595	91.8102	3	1.57277	CLIP	Cluster24
471	PARD3	94.4595	85.1841	4	2.1589	CLIP	Cluster22
472	SNRPA1	94.4418	98.4895	19	0.0302073		Cluster26
473	TERT	94.43	97.9113	8	0.392611		Cluster44
474	NDEL1	94.4182	95.0555	14	0.486404		Cluster18
475	TAF5	94.4064	85.957	6	1.68192
476	CEP76	94.3946	89.8808	9	1.10448
477	PSMD3	94.3828	88.683	5	1.44726
478	TJP1	94.371	90.0342	2	2.31766	CLIP	Cluster20
479	NF2	94.3592	85.8095	4	2.0366		Cluster1
480	RNGTT	94.3474	93.126	6	0.942929
481	PALLD	94.3356	89.1787	7	1.25771	CLIP	Cluster24
482	LIG4	94.3238	89.6566	3	1.76069		Cluster35
483	BBS10	94.312	94.6424	4	0.97973
484	PRKAR2A	94.3002	97.8641	3	0.825425		Cluster8
485	ORC5	94.2884	88.8482	5	1.4212		Cluster35
486	CNTRL	94.2766	89.8808	9	1.07903
487	PELO	94.2648	99.4749	3	0.57594		Cluster9
488	ARHGEF2	94.253	86.0397	3	2.37518	CLIP	Cluster38
489	MTM1	94.2412	99.4454	1	1.61462		Cluster3
490	WDR74	94.2294	97.038	4	0.71941		Cluster37
491	KIF5A	94.2176	93.5332	4	1.09832	RNA	Cluster27
492	EIF4A2	94.2058	93.0139	3	1.34633	CLIP	Cluster43
493	CWC22	94.194	88.4293	7	1.28605
494	CDC16	94.1822	97.4628	14	0.191678		Cluster27
495	VPS16	94.1704	85.1428	3	2.52153
496	PSMD4	94.1586	90.6538	4	1.37759		Cluster9
497	POLR2I	94.1468	97.4156	18	0.125356		Cluster26
498	AP1G1	94.135	89.9457	6	1.20537	CLIP	Cluster19
499	STAU1	94.1232	92.3059	3	1.41294	CLIP	Cluster14
500	INPP5D	94.1114	82.877	5	2.16261
501	CDT1	94.0996	88.8482	6	1.29494
502	MAPK1	94.0878	99.7522	14	-0.138314		Cluster39
503	KAT8	94.0701	85.0602	6	1.68088
504	DHX15	94.0701	89.1138	3	1.76755	CLIP	Cluster26
505	SUPT16H	94.0524	82.9832	4	2.4893	CLIP	Cluster26
506	EIF3G	94.0406	91.3972	4	1.31688
507	PRL	94.0288	82.9242	8	1.80261
508	RUNX2	94.017	96.2886	10	0.402034		Cluster44
509	ERBB3	94.0052	83.8447	4	2.21107
510	EXOC2	93.9934	90.3233	2	2.12497	CLIP	Cluster20
511	DPF2	93.9816	88.5532	3	1.81011	CLIP	Cluster16
512	SFI1	93.9698	91.5506	10	0.838993
513	RARA	93.958	91.4798	11	0.794393		Cluster44
514	PSMD1	93.9462	84.4465	3	2.55588	CLIP	Cluster9
515	IK	93.9344	86.2049	4	1.83548
516	TP73	93.9226	84.2459	5	1.87159
517	SKIV2L	93.9108	85.9039	3	2.24653	CLIP	Cluster6
518	ANAPC1	93.899	84.6354	4	2.02119	CLIP	Cluster27
519	DMAP1	93.8872	87.2315	5	1.48894
520	PRKD1	93.8754	92.9785	5	0.93983		Cluster20
521	CD2BP2	93.8636	95.5393	15	0.311218		Cluster26
522	PML	93.8518	90.5948	6	1.08912
523	PSMD6	93.84	85.3316	4	1.90766	CLIP	Cluster9
524	PLK4	93.8282	92.1053	10	0.721706
525	MYH11	93.8164	91.1494	5	1.11944
526	HDAC4	93.8046	94.1586	10	0.537542		Cluster34
527	NUP88	93.7928	85.78	12	1.20256		Cluster18
528	CENPJ	93.781	90.2997	9	0.935667
529	NEDD4	93.7692	91.3382	3	1.44694	CLIP	Cluster22
530	JAG1	93.7574	85.8803	3	2.15934	CLIP	Cluster22
531	PHF1	93.7456	98.2653	5	0.38773		Cluster45
532	DVL2	93.7338	87.6092	5	1.40096
533	ATRIP	93.722	89.0253	6	1.19123		Cluster35
534	NUDC	93.7102	87.6564	10	1.0863
535	MGA	93.6984	81.8327	5	2.21564	CLIP	Cluster16
536	RPS5	93.6866	93.6158	10	0.574098		Cluster14
537	ARCN1	93.6748	86.9837	10	1.13889	CLIP	Cluster19
538	PCF11	93.663	95.1617	15	0.304671		Cluster26
539	STK3	93.6512	99.0854	11	-0.00645947		Cluster36
540	MED15	93.6394	85.9452	10	1.2445		Cluster2
541	FANCD2	93.6276	90.8485	3	1.44555		Cluster2
542	MBD3	93.6158	86.8185	7	1.32175
543	HRAS	93.604	96.3595	6	0.49859		Cluster25
544	PANK4	93.5922	97.0852	1	1.93671		Cluster3
545	MED23	93.5804	86.4409	11	1.13358
546	NOP14	93.5686	88.0104	3	1.70864
547	TNKS1BP1	93.5568	86.7359	2	2.7085	CLIP	Cluster23
548	PKP2	93.545	86.4881	2	2.79251	CLIP	Cluster42
549	BTRC	93.5332	93.3443	7	0.687335		Cluster8
550	NELFCD	93.5214	88.8482	6	1.15575
551	MED14	93.5096	87.2433	11	1.01904		Cluster2
552	AGMAT	93.4978	88.9308	4	1.38289
553	PLK2	93.486	89.3557	3	1.55938	RNA	Cluster27
554	EXOC6	93.4742	88.1756	2	2.2081
555	NUP62	93.4624	86.6533	11	1.09422		Cluster18
556	DST	93.4506	85.7269	3	2.04537	CLIP	Cluster28
557	SMG7	93.4388	92.4593	7	0.749423
558	YY1	93.427	97.7047	9	0.173929		Cluster34
559	HNRNPR	93.4152	96.0703	16	0.155602		Cluster26
560	BLM	93.4034	80.3399	4	2.94441	CLIP	Cluster4
561	CENPE	93.3916	87.739	10	1.01164		Cluster18
562	MED13L	93.3798	80.4579	8	1.9285	CLIP	Cluster31
563	PHF20	93.3679	82.9242	6	1.70714	CLIP	Cluster16
564	DSP	93.3561	81.6144	3	3.67514	CLIP	Cluster42
565	SSNA1	93.3443	95.6455	10	0.299466		Cluster13
566	UPF3B	93.3325	98.1119	21	-0.0850681		Cluster26
567	ATP1A3	93.3207	91.7158	2	1.65727	RNA	Cluster11
568	HSP90AB1	93.3089	86.9129	3	1.76704	CLIP	Cluster41
569	UBTF	93.2971	81.278	5	2.06964	CLIP	Cluster33
570	AR	93.2853	99.2683	18	-0.225735		Cluster44
571	CTNNA2	93.2735	78.2865	5	2.87815	CLIP	Cluster38
572	DPYSL4	93.2617	89.3085	5	1.13373		Cluster17
573	CENPL	93.2499	87.6564	10	0.963842
574	RFC1	93.2381	84.8596	4	1.70232	CLIP	Cluster4
575	HDAC11	93.2263	86.7949	7	1.20224
576	NOP58	93.2145	99.764	16	-0.343127		Cluster37
577	LIMK1	93.2027	90.6184	5	0.988526		Cluster1
578	PRPF3	93.1909	94.1114	7	0.540819
579	NUP98	93.1791	81.9094	8	1.65114	CLIP	Cluster18
580	FBXO18	93.1673	87.0073	4	1.45566	CLIP	Cluster8
581	PAFAH1B1	93.1555	99.1975	26	-0.26556		Cluster27
582	MED1	93.1437	84.4819	5	1.548	CLIP	Cluster31
583	UTP6	93.1319	90.8308	4	1.09147
584	PPP5C	93.1201	83.6972	3	2.12807	CLIP	Cluster27
585	XRCC1	93.1083	90.7364	4	1.09504
586	TBL3	93.0965	84.7062	3	1.96539
587	AP1G2	93.0847	91.4562	13	0.548496		Cluster19
588	CD2AP	93.0729	97.0262	11	0.0295318		Cluster24
589	KAT2B	93.0611	98.8435	17	-0.208259		Cluster16
590	PLEC	93.0493	83.8329	2	3.52158	CLIP	Cluster14
591	FXR2	93.0375	93.0021	1	2.60156	CLIP	Cluster41
592	MRTO4	93.0257	97.392	5	0.301372		Cluster37
593	EPRS	93.0139	76.835	5	3.40609	CLIP	Cluster21
594	POLR2G	93.0021	97.2032	17	-0.0300197		Cluster26
595	RIMS1	92.9903	91.1612	4	1.04651		Cluster45
596	SNRPA	92.9785	95.5039	15	0.0910493		Cluster26
597	THBS1	92.9667	93.0434	5	0.695057		Cluster1
598	SCN8A	92.9549	97.3684	2	0.867055		Cluster39
599	CASC3	92.9431	93.362	7	0.55738
600	GSK3B	92.9313	98.9025	8	-0.0196061		Cluster5
601	VDAC1	92.9195	97.0734	2	0.893966		Cluster12
602	MED30	92.9077	85.3198	11	1.03622
603	DPYSL5	92.8959	86.0515	4	1.49028	CLIP	Cluster17
604	GATAD2A	92.8841	86.2167	7	1.16943
605	RAD17	92.8723	90.9547	6	0.816243
606	APLF	92.8605	87.0781	5	1.2087
607	LMNB1	92.8487	91.173	5	0.877183
608	PSMD8	92.8369	88.565	5	1.08403
609	PPFIA2	92.8251	86.5943	3	1.66669		Cluster1
610	SP1	92.8133	98.2181	11	-0.0786116		Cluster44
611	PPP1CC	92.8015	97.7637	15	-0.0905564		Cluster18
612	CSK	92.7897	84.8006	6	1.32617
613	MDM2	92.7779	98.6665	11	-0.135646	RNA	Cluster44
614	PTPN6	92.7661	84.6944	5	1.42361
615	ANAPC2	92.7543	86.0219	4	1.47575
616	UBA1	92.7425	83.8093	2	2.88161	CLIP	Cluster22
617	CTTN	92.7307	98.5013	15	-0.182994		Cluster20
618	PSMB4	92.7189	89.1315	5	1.01168
619	DCTN3	92.7071	96.0231	12	0.0418507		Cluster27
620	EP400	92.6953	81.6262	4	2.03368	CLIP	Cluster16
621	PPP2CA	92.6835	99.3923	15	-0.322031		Cluster36
622	BCR	92.6717	80.0566	3	3.147	CLIP	Cluster25
623	CALM3	92.6599	99.587	22	-0.45418		Cluster27
624	RASSF1	92.6481	86.9955	5	1.17808
625	SNRNP40	92.6363	95.1204	15	0.0687912		Cluster26
626	HNRNPH2	92.6245	86.2993	5	1.25505
627	RBBP4	92.6127	98.9851	16	-0.299869		Cluster34
628	DLL4	92.6009	86.9247	4	1.32789
629	GTF2H3	92.5891	92.9903	9	0.432305
630	SRSF9	92.5773	95.2443	15	0.0391819		Cluster26
631	DDX42	92.5655	82.6705	4	1.79153	CLIP	Cluster26
632	GRIP1	92.5537	91.1848	4	0.94939		Cluster44
633	SHC1	92.5419	97.6162	13	-0.0972275		Cluster25
634	SRP72	92.5301	91.9578	4	0.870702		Cluster14
635	TAF9	92.5183	95.4921	12	0.054545		Cluster33
636	ITGAV	92.5065	96.507	9	0.0683996		Cluster1
637	SGK1	92.4947	91.9224	6	0.655887
638	RPL8	92.4829	92.5301	9	0.46071		Cluster14
639	KCNQ2	92.4711	90.9075	5	0.808857		Cluster1
640	LRP5	92.4593	77.1477	4	3.4563	CLIP	Cluster42
641	HLA-A	92.4475	98.2063	9	-0.061922		Cluster19
642	CASK	92.4357	94.1468	2	1.10887		Cluster3
643	FBN1	92.4239	82.0392	3	2.20471	CLIP	Cluster42
644	NRCAM	92.4121	91.9224	6	0.643214		Cluster1
645	TRAPPC2	92.4003	96.4952	2	0.857891		Cluster7
646	CRMP1	92.3885	85.9334	4	1.38845	CLIP	Cluster17
647	SMO	92.3767	85.4142	3	1.66423	CLIP	Cluster22
648	RCC2	92.3649	87.6564	10	0.760737
649	DPF3	92.3531	95.7281	7	0.223707		Cluster16
650	H2AFX	92.3413	93.7338	8	0.366597		Cluster2
651	CETN2	92.3295	94.0288	11	0.198658
652	ZBTB16	92.3177	79.1834	4	2.29563		Cluster2
653	DLG1	92.3059	96.625	5	0.260115		Cluster3
654	COPE	92.2941	88.506	11	0.634295		Cluster19
655	MNAT1	92.2823	93.2735	9	0.359042
656	POLR1A	92.2705	81.1659	4	1.94047	CLIP	Cluster33
657	PHF10	92.2587	95.7281	7	0.209767		Cluster16
658	RTF1	92.2469	84.3049	4	1.50274	CLIP	Cluster33
659	PSME4	92.2351	82.6292	3	2.03588	CLIP	Cluster9
660	DDX24	92.2233	82.6705	2	3.01514	CLIP	Cluster37
661	REV3L	92.2115	92.0109	5	0.671992		Cluster30
662	WDR82	92.1997	95.6337	6	0.259975		Cluster2
663	STAT6	92.1879	84.4111	7	1.16542
664	ORC3	92.1761	89.7569	5	0.844428		Cluster35
665	POLR2E	92.1643	99.0087	22	-0.414627		Cluster26
666	USP4	92.1525	80.0448	3	2.53399	CLIP	Cluster33
667	APC	92.1407	83.7975	3	1.76121	CLIP	Cluster5
668	UTP20	92.1289	84.0571	2	2.317	CLIP	Cluster37
669	KAT6A	92.1171	76.7878	5	2.40281	CLIP	Cluster32
670	NFASC	92.1053	97.1678	5	0.166319		Cluster1
671	HSPD1	92.0935	83.5969	2	2.38997	CLIP	Cluster26
672	PRKCA	92.0817	92.8959	3	0.852065
673	KHDRBS1	92.0699	91.8279	8	0.51853
674	JAG2	92.0581	88.9663	4	1.02122
675	MAD1L1	92.0463	88.2818	10	0.647215		Cluster18
676	LAMA1	92.0286	80.4815	3	2.3134	CLIP	Cluster42
677	CEBPB	92.0286	84.4996	5	1.26676
678	BRPF1	92.0109	78.1449	4	2.37181	CLIP	Cluster32
679	LAS1L	91.9991	83.945	6	1.22041
680	PPP1R12A	91.9873	90.8485	3	1.0365
681	CDC42	91.9696	99.5044	21	-0.577822		Cluster38
682	MED11	91.9696	84.9186	11	0.868907
683	EIF2AK2	91.9519	99.1503	8	-0.215047		Cluster32
684	EIF2S2	91.9401	96.4598	5	0.210956		Cluster43
685	DHX37	91.9283	83.2429	2	2.42809
686	RPF2	91.9164	96.5837	5	0.200018		Cluster37
687	SPDL1	91.9047	89.5917	10	0.549862		Cluster18
688	CRK	91.8928	98.1473	12	-0.240208		Cluster25
689	PTTG1	91.881	88.6594	5	0.87539		Cluster27
690	NSL1	91.8692	88.7774	10	0.600883		Cluster18
691	ARHGEF12	91.8574	83.3609	4	1.51022	CLIP	Cluster20
692	NUP35	91.8456	84.954	11	0.851412		Cluster18
693	DICER1	91.8338	92.4829	1	2.08477	CLIP	Cluster41
694	CDC23	91.822	85.9039	4	1.28127
695	SMARCAL1	91.8102	78.5461	3	2.82571	CLIP	Cluster4
696	NUMB	91.7984	92.8723	8	0.341952		Cluster1
697	LRPPRC	91.7866	90.6361	1	2.47859	CLIP	Cluster14
698	USO1	91.7748	84.8124	4	1.3331	CLIP	Cluster7
699	TAF4	91.763	94.4772	11	0.0383369
700	KAT6B	91.7512	80.2927	5	1.67578	CLIP	Cluster32
701	ACD	91.7394	89.0489	5	0.818013
702	NTN1	91.7276	94.8312	6	0.236393
703	YWHAE	91.7158	97.3271	15	-0.227242		Cluster27
704	THBS2	91.704	85.5086	3	1.48529
705	POLR3B	91.6922	79.1834	4	2.02702		Cluster45
706	SNRPD2	91.6804	98.0883	17	-0.344719	RNA	Cluster26
707	MED13	91.6686	84.3934	10	0.901427	CLIP	Cluster31
708	LRP4	91.6568	89.6861	1	2.69809	CLIP	Cluster11
709	CPSF7	91.645	96.684	16	-0.202063		Cluster26
710	CAD	91.6332	80.8827	2	3.41418	CLIP	Cluster25
711	EIF6	91.6214	97.097	3	0.383065		Cluster37
712	RND1	91.6096	94.371	5	0.349243		Cluster1
713	EIF3L	91.5978	90.996	3	0.961402
714	SHH	91.586	93.0434	6	0.398308		Cluster1
715	DYNC1I1	91.5742	87.3731	4	1.06043
716	MYO3A	91.5624	89.4737	7	0.622471		Cluster24
717	PTPN12	91.5506	88.1874	6	0.760754
718	EGF	91.5388	95.2915	12	-0.0242398		Cluster1
719	RPS14	91.527	93.7574	10	0.115116	RNA	Cluster14
720	SART3	91.5152	86.3229	2	1.74045	CLIP	Cluster26
721	BRIX1	91.5034	95.4803	4	0.348479		Cluster37
722	MAPRE1	91.4916	97.8169	20	-0.360434		Cluster27
723	ATP6V1A	91.4798	86.5589	3	1.33271
724	PSMD7	91.468	88.8777	5	0.776773
725	EPHB3	91.4562	83.178	3	1.673
726	WDR5	91.4444	94.0406	10	0.061143		Cluster2
727	RPS6KA3	91.4326	91.468	4	0.696825
728	HLA-DRB1	91.4208	94.3356	12	0		Cluster19
729	NOC4L	91.409	89.7451	4	0.823308
730	RPS6KB1	91.3972	98.9143	9	-0.324417		Cluster29
731	CACNA1B	91.3854	84.6	3	1.46622
732	CACNA1G	91.3736	82.169	2	2.4169
733	EXOC7	91.3618	91.2615	3	0.878055
734	EPHA6	91.35	84.8773	3	1.4266
735	RPS3	91.3382	96.4185	13	-0.189609		Cluster14
736	MAP3K11	91.3264	82.2457	4	1.52399
737	GSN	91.3146	79.7498	3	2.15661	CLIP	Cluster20
738	NFE2L2	91.3028	89.0017	5	0.724424
739	CACHD1	91.291	90.6066	4	0.721578
740	SNRPC	91.2792	91.881	4	0.635753
741	SNUPN	91.2674	83.4435	2	2.0519
742	EIF3E	91.2556	93.5922	5	0.343956		Cluster43
743	TBL1X	91.2438	90.8898	10	0.323274		Cluster27
744	LAMA5	91.232	81.0774	4	1.62032
745	HLA-C	91.2202	95.5216	7	0.0127486		Cluster19
746	CDK5R1	91.2084	93.7928	8	0.140868		Cluster17
747	ATP6V1H	91.1966	88.9072	4	0.849484
748	DLGAP5	91.1848	92.2646	1	1.89809	CLIP	Cluster27
749	ITGA3	91.173	85.6148	4	1.14919
750	PABPC1	91.1612	98.6547	6	-0.199043		Cluster40
751	UNC5A	91.1494	87.2669	2	1.51702
752	CDC45	91.1376	85.1015	4	1.17271		Cluster35
753	MED27	91.1258	82.2457	9	1.07759
754	AMOTL1	91.114	94.9434	2	0.747348		Cluster45
755	PSMB1	91.1022	86.612	4	1.04603
756	BRAF	91.0904	94.5598	5	0.229279		Cluster1
757	SUGP1	91.0786	97.1088	17	-0.349064		Cluster26
758	SKI	91.0668	83.0422	4	1.3435
759	GRB10	91.055	86.6946	5	0.882872		Cluster1
760	UBE3A	91.0432	85.3434	4	1.13872	CLIP	Cluster16
761	BCL6	91.0314	88.9899	6	0.615947
762	SETDB1	91.0196	82.3873	2	2.21661	CLIP	Cluster16
763	CNTN1	91.0078	93.9816	4	0.392028		Cluster1
764	EPHA4	90.9901	91.2202	4	0.632888
765	CCNF	90.9901	81.8858	4	1.47822
766	CALM2	90.9724	99.6342	22	-0.878972		Cluster27
767	HNRNPA0	90.9606	96.2355	16	-0.270558		Cluster26
768	PSMA4	90.9488	93.4388	6	0.235796		Cluster45
769	EIF5B	90.937	84.6708	2	1.74535	CLIP	Cluster14
770	EXOSC4	90.9252	76.658	3	2.7469
771	TDRD3	90.9134	95.6042	2	0.657385		Cluster41
772	GTF3C1	90.9016	75.8556	3	3.31005	CLIP	Cluster26
773	CNTN2	90.8898	89.4265	2	1.26602		Cluster45
774	FHL2	90.878	86.2639	3	1.22452
775	PSMC4	90.8662	85.9806	4	1.06424
776	ORC1	90.8544	80.1983	3	1.92663		Cluster35
777	KIF21A	90.8426	81.5199	2	2.30111	CLIP	Cluster8
778	HDAC9	90.8308	98.3361	14	-0.487844		Cluster34
779	STAT5A	90.819	81.0066	4	1.52054
780	RAN	90.8072	94.1232	15	-0.105108		Cluster10
781	BARD1	90.7895	92.6186	7	0.233655		Cluster2
782	PPARG	90.7895	93.4152	11	0		Cluster44
783	KARS	90.7718	78.0623	4	1.90629		Cluster21
784	WNK1	90.76	84.1279	2	1.78589	CLIP	Cluster42
785	NUP54	90.7482	84.954	11	0.632122		Cluster18
786	COPS5	90.7364	96.1057	8	-0.0926675		Cluster43
787	MAPK8IP1	90.7246	81.396	3	1.68817
788	USP9X	90.7128	78.9828	2	3.04138	CLIP	Cluster32
789	NOL6	90.701	83.1013	2	1.92415
790	RBBP8	90.6833	83.9155	5	1.03458
791	NOTCH4	90.6833	87.5384	4	0.858969
792	RNF8	90.6656	83.7739	4	1.18204		Cluster2
793	MLH1	90.6538	89.9693	4	0.67035		Cluster35
794	PHTF1	90.642	84.8242	3	1.28448
795	NUP43	90.6302	96.2532	19	-0.356421		Cluster18
796	CDC25A	90.6184	82.2988	4	1.3689
797	SLU7	90.6066	78.4281	3	2.09876	CLIP	Cluster26
798	MAPK12	90.5948	85.0248	6	0.843527		Cluster38
799	SMAD7	90.583	86.1223	4	0.974252
800	NCBP2	90.5712	99.168	22	-0.822325		Cluster26
801	TNFRSF1A	90.5594	87.2197	4	0.868583
802	FEN1	90.5476	83.5025	3	1.39511		Cluster35
803	CDK7	90.5358	94.843	9	-0.0668932
804	VPS39	90.524	83.4789	2	1.77856	CLIP	Cluster6
805	FYCO1	90.5122	89.5681	1	2.07357	CLIP	Cluster14
806	CEP152	90.5004	90.0755	9	0.303253
807	NUP37	90.4886	96.2532	19	-0.383698		Cluster18
808	KLHL13	90.4768	77.4369	4	1.87049
809	PHF5A	90.465	97.3448	17	-0.494167		Cluster26
810	RPTOR	90.4532	83.5261	3	1.36402		Cluster45
811	SMAD3	90.4413	96.7961	10	-0.288009		Cluster44
812	PPFIA3	90.4295	80.3517	2	2.34835		Cluster45
813	KAT2A	90.4177	88.4942	9	0.405863
814	SH3PXD2B	90.4059	81.3075	3	1.62665	CLIP	Cluster20
815	CDK8	90.3941	89.7687	13	0.175919		Cluster2
816	IARS	90.3823	76.6816	4	1.95636	CLIP	Cluster21
817	LAMA2	90.3705	75.9028	3	2.56424
818	AAAS	90.3587	84.7298	11	0.584862		Cluster18
819	POT1	90.3469	91.1258	5	0.421644
820	PSMC2	90.3351	87.0309	4	0.834084
821	EHMT2	90.3233	78.853	2	2.71056	CLIP	Cluster34
822	RFC2	90.3115	93.2499	7	0.0808495		Cluster4
823	RRP9	90.2997	81.3783	2	2.08437
824	APAF1	90.2879	81.815	3	1.5555	CLIP	Cluster32
825	RARS	90.2761	81.2013	5	1.23787		Cluster21
826	ADRM1	90.2643	84.6826	3	1.22066
827	GTF2B	90.2525	82.9478	4	1.19475
828	DNAJC8	90.2407	95.1204	15	-0.271666		Cluster26
829	EFNB2	90.2289	93.8518	5	0.142718		Cluster25
830	PSMB2	90.2171	94.2058	6	0.012894
831	PDCD4	90.2053	88.2169	3	0.894168
832	RAC1	90.1935	99.7876	24	-1.17669		Cluster38
833	ATXN7L3	90.1817	75.3835	4	2.09226
834	CALM1	90.1699	99.7404	25	-1.162		Cluster27
835	SNRPB2	90.1581	95.1204	15	-0.296369		Cluster26
836	CCNE1	90.1463	79.0654	3	1.8271		Cluster35
837	SPAG9	90.1345	84.5409	5	0.872069	CLIP	Cluster38
838	NEO1	90.1227	82.7354	3	1.39969	CLIP	Cluster38
839	PPP1CB	90.1109	92.8133	6	0.136818
840	BRD1	90.0991	74.7935	4	2.1598	CLIP	Cluster32
841	ARHGEF11	90.0873	86.5235	4	0.846175		Cluster20
842	FANCC	90.0755	83.1957	5	0.982815		Cluster45
843	TXN	90.0637	86.966	2	1.3107	RNA	Cluster30
844	HEATR1	90.0519	81.2957	2	2.00789	CLIP	Cluster37
845	GPC1	90.0401	89.1905	5	0.513754		Cluster1
846	LAMC1	90.0283	78.4576	3	1.90708	CLIP	Cluster42
847	MED4	90.0165	85.9924	11	0.472025		Cluster2
848	EPHB1	90.0047	82.0038	3	1.46464
849	PSMD14	89.9929	88.034	5	0.569683
850	LAMB2	89.9811	75.8379	3	2.35575	CLIP	Cluster42
851	CTCF	89.9693	76.9766	3	2.11897	CLIP	Cluster33
852	NELFA	89.9575	86.3406	5	0.703081
853	CEP63	89.9457	91.232	10	0.0645065
854	LCK	89.9339	99.5162	20	-1.10368		Cluster25
855	LAMB1	89.9221	78.4576	3	1.85702	CLIP	Cluster42
856	EXOSC10	89.9103	79.974	4	1.42833		Cluster45
857	AGO2	89.8985	97.7814	5	-0.220909		Cluster41
858	ZHX2	89.8867	78.9946	3	1.75233
859	NGFR	89.8749	88.0576	3	0.838246
860	CEP290	89.8631	89.4619	9	0.235257
861	PSMD13	89.8513	88.447	5	0.52228
862	EXOC1	89.8395	87.8924	2	1.17026
863	CNOT8	89.8277	90.1345	3	0.680601		Cluster23
864	RAD9A	89.8159	92.5714	5	0.185998		Cluster2
865	VPS41	89.8041	83.5143	2	1.59434	CLIP	Cluster6
866	H3F3B	89.7923	99.3746	13	-0.927345		Cluster16
867	ATP5G1	89.7805	83.9745	2	1.53041		Cluster7
868	KLHL22	89.7687	75.6136	4	1.92873
869	EIF4H	89.7569	97.2268	6	-0.259604		Cluster43
870	MAPK11	89.7451	91.35	7	0.178459		Cluster38
871	RAD23A	89.7333	89.3734	4	0.560624		Cluster9
872	EIF3K	89.7215	91.3146	4	0.430703
873	ANAPC7	89.7097	86.0987	5	0.680861
874	NCOA6	89.6979	85.9216	5	0.703373		Cluster2
875	TXNL4A	89.6861	96.3595	16	-0.507968		Cluster26
876	IRAK1	89.6743	84.5645	4	0.916732
877	LRP6	89.6625	81.4373	2	1.85932	CLIP	Cluster5
878	RPS6	89.6507	95.97	12	-0.40997	RNA	Cluster14
879	EIF2AK1	89.6389	84.2813	2	1.47225	CLIP	Cluster33
880	AP1S1	89.6271	93.3207	15	-0.216317		Cluster19
881	SCN5A	89.6153	92.9431	1	1.3755
882	RBBP5	89.6035	92.4475	10	-0.050222		Cluster2
883	SMG1	89.5917	80.9181	2	1.92402	CLIP	Cluster14
884	PPP2R3A	89.5799	86.8539	4	0.72355		Cluster45
885	TBP	89.5681	91.9991	7	0.0772414		Cluster33
886	RPLP0	89.5563	92.595	9	-0.0137589		Cluster14
887	KPNA2	89.5445	85.5322	2	1.34644	CLIP	Cluster26
888	PRMT5	89.5327	89.3911	1	1.78437
889	EXOSC9	89.5209	81.7914	3	1.38359		Cluster45
890	MIS12	89.5091	92.595	12	-0.138675		Cluster18
891	UBE2I	89.4973	96.0113	6	-0.187235		Cluster2
892	STAT5B	89.4855	78.1567	4	1.5261	CLIP	Cluster25
893	RET	89.4737	92.0463	7	0.0528757		Cluster1
894	FBXW5	89.4619	84.0453	6	0.719767
895	NLE1	89.4501	91.3795	2	0.827666
896	RPL4	89.4383	92.6363	9	-0.0394136
897	RPL7A	89.4206	90.878	8	0.0989056		Cluster14
898	BRPF3	89.4206	74.7935	4	1.94415	CLIP	Cluster32
899	BRD8	89.4029	77.2953	3	1.90799	CLIP	Cluster16
900	RANBP2	89.3911	74.764	3	2.31244	CLIP	Cluster10
901	ACTN2	89.3793	96.1824	13	-0.487223		Cluster24
902	MTA1	89.3675	78.3101	5	1.32631
903	TUBGCP4	89.3557	90.4591	9	0.0641848
904	YBX1	89.3439	98.2476	18	-0.888484		Cluster26
905	PHF12	89.3321	84.659	7	0.602929
906	MED26	89.3203	85.6502	11	0.37577
907	RBM5	89.3085	97.5513	17	-0.759357		Cluster26
908	SMAD1	89.2967	83.2665	5	0.846592
909	TP53BP1	89.2849	75.6785	3	2.10317	CLIP	Cluster27
910	CASP9	89.2731	96.4362	7	-0.302059		Cluster45
911	MAPK8IP3	89.2613	79.2188	2	2.08811	CLIP	Cluster42
912	ACTN4	89.2495	77.1772	3	1.8725	CLIP	Cluster24
913	BCL2L1	89.2377	92.1997	5	0.130441
914	CHEK1	89.2259	95.5629	9	-0.319944		Cluster4
915	POLR1C	89.2141	87.1902	7	0.401435
916	CHERP	89.2023	84.7534	3	1.00101
917	YWHAH	89.1905	87.4321	5	0.494698
918	ANAPC5	89.1787	83.054	3	1.16221	CLIP	Cluster27
919	PAF1	89.1669	80.9535	4	1.17594
920	SMAD2	89.1551	99.3038	19	-1.20485		Cluster16
921	BCL2L13	89.1433	98.283	2	0.072133		Cluster40
922	RBX1	89.1315	98.5426	19	-1.02022		Cluster8
923	TERF2IP	89.1197	91.6037	6	0.0975775
924	RPS20	89.1079	99.3451	14	-1.11778	RNA	Cluster14
925	BUD31	89.0961	90.2053	8	0.0885132	RNA	Cluster26
926	ADCY2	89.0843	81.0243	2	1.74301		Cluster45
927	BIRC5	89.0725	97.7224	21	-0.889609		Cluster27
928	MAPK8	89.0607	98.3774	8	-0.62481		Cluster21
929	TSG101	89.0489	86.3819	3	0.862024
930	ZIC2	89.0371	76.835	3	1.83346
931	CXXC1	89.0253	79.5964	4	1.28588
932	YAP1	89.0135	94.9847	5	-0.109931		Cluster30
933	EIF2AK4	89.0017	82.9596	1	3.07949	CLIP	Cluster9
934	CEP78	88.9899	89.8808	9	0.0405327
935	GAPDH	88.9781	87.9632	4	0.536444		Cluster45
936	TNKS2	88.9663	87.0191	1	1.9372	CLIP	Cluster27
937	MYBBP1A	88.9544	75.1711	3	2.06857
938	KLHL12	88.9426	76.4869	3	1.84788	CLIP	Cluster27
939	IL4R	88.9308	71.6899	3	2.97867
940	CEP72	88.919	89.8808	9	0.0352127
941	CACNG6	88.9072	80.6231	2	1.74426
942	SF3B6	88.8954	96.7253	17	-0.745597	RNA	Cluster26
943	ARHGAP6	88.8836	87.7095	7	0.300003		Cluster24
944	ING2	88.8718	87.9514	7	0.27892		Cluster34
945	DDX20	88.86	86.3111	2	1.14934
946	DMD	88.8482	88.27	4	0.500076
947	GTF2F2	88.8364	96.9082	17	-0.778253		Cluster26
948	USP47	88.8246	73.4128	3	2.34513	CLIP	Cluster8
949	SYF2	88.8128	80.275	4	1.17336
950	SAE1	88.801	95.4154	1	0.960224		Cluster2
951	ORC2	88.7892	94.2825	8	-0.232436		Cluster35
952	SUN1	88.7774	90.4413	5	0.202509
953	USF1	88.7656	86.4586	7	0.387955
954	CDC37	88.7538	86.966	4	0.582081
955	CUL7	88.742	74.3923	2	3.60029	CLIP	Cluster8
956	KEAP1	88.7302	74.9115	2	2.99275	CLIP	Cluster8
957	XRN1	88.7184	87.8806	3	0.657779		Cluster45
958	SOCS3	88.7066	89.2436	7	0.15278
959	WDR12	88.6948	97.5513	5	-0.385174		Cluster37
960	SMAD4	88.683	94.43	6	-0.173484		Cluster44
961	ITGA5	88.6712	77.7673	3	1.6258
962	SNRPD3	88.6594	98.4305	18	-1.09635		Cluster26
963	HDAC7	88.6476	82.5938	8	0.622087
964	SORBS1	88.6358	89.5917	5	0.237724
965	PNKP	88.624	88.3644	4	0.456711
966	CHCHD3	88.6122	77.7555	3	1.60895		Cluster15
967	MYH9	88.6004	82.8062	1	2.77413	CLIP	Cluster17
968	TERF1	88.5886	98.0765	7	-0.631699		Cluster27
969	ARHGAP35	88.5768	74.8879	2	2.86037	CLIP	Cluster20
970	EIF2S1	88.565	97.3802	6	-0.475857		Cluster43
971	BAZ2A	88.5532	75.9323	2	2.47072	CLIP	Cluster34
972	ATP6V0D1	88.5414	86.5589	3	0.748879
973	BAG3	88.5296	80.3871	4	1.11929
974	CAPN2	88.5178	87.1607	2	0.980698
975	ABCE1	88.5001	86.1813	1	1.94441
976	ADCY7	88.5001	72.1619	3	2.45688		Cluster45
977	FAU	88.4824	93.7692	10	-0.322312		Cluster14
978	BAP1	88.4706	76.363	3	1.73331
979	RRP12	88.4588	83.1544	1	2.51718		Cluster37
980	AGAP2	88.447	79.3722	2	1.78493		Cluster3
981	SETD1A	88.4352	74.5929	2	2.84786	CLIP	Cluster16
982	FBXW11	88.4234	79.8442	4	1.15367	CLIP	Cluster8
983	MORF4L1	88.4116	95.6809	14	-0.649491		Cluster34
984	UBA2	88.3998	85.6974	1	1.99158	CLIP	Cluster22
985	ITGA1	88.388	92.2292	6	-0.029269
986	NXF1	88.3762	91.7748	7	-0.0247801
987	SRSF11	88.3644	97.628	17	-1.0143		Cluster26
988	KANSL1	88.3526	83.945	6	0.555258
989	DYRK1A	88.3408	90.0106	4	0.289753
990	PSMB5	88.329	88.5296	5	0.261302		Cluster45
991	PSMD12	88.3172	89.3321	5	0.205685
992	MED18	88.3054	84.9186	11	0.234613
993	CDH6	88.2936	75.9323	4	1.49933		Cluster45
994	GPKOW	88.2818	78.6169	4	1.21429
995	DBF4	88.27	83.2075	4	0.79362
996	EXOC5	88.2582	89.0725	2	0.786555
997	SMARCE1	88.2464	98.7137	14	-1.18873		Cluster16
998	SEMA3A	88.2346	95.1617	5	-0.225628		Cluster17
999	TAOK1	88.2228	87.975	10	0.00228215
1000	CCND1	88.211	94.9729	11	-0.542244		Cluster35
1001	FGFR1	88.1992	80.4697	2	1.59637	CLIP	Cluster39
1002	MYD88	88.1874	82.3106	2	1.42247
1003	MCL1	88.1756	98.3007	3	-0.271887		Cluster44
1004	EIF3M	88.1638	89.8041	3	0.455839	RNA	Cluster43
1005	RPL6	88.152	94.4949	10	-0.437737		Cluster14
1006	LSM2	88.1402	97.2858	4	-0.333808		Cluster26
1007	ARHGDIA	88.1284	92.2646	6	-0.0753499		Cluster20
1008	SRF	88.1107	88.1579	5	0.256612		Cluster2
1009	POLR2D	88.1107	97.5041	18	-1.08235		Cluster26
1010	EPB41	88.093	82.9242	2	1.30891	CLIP	Cluster42
1011	TRAF3	88.0812	83.3491	2	1.25805		Cluster41
1012	FBXL5	88.0694	77.2717	4	1.32662	CLIP	Cluster8
1013	UPF3A	88.0576	93.0906	7	-0.204139
1014	SKA1	88.0458	96.3772	17	-0.885174		Cluster27
1015	APBB1	88.034	73.46	2	3.057	CLIP	Cluster31
1016	HK2	88.0222	72.9408	2	3.97968	CLIP&RNA	Cluster38
1017	CALD1	88.0104	92.6835	5	-0.0613626
1018	SLC9A3R1	87.9986	89.6271	3	0.449724		Cluster1
1019	VAV1	87.9868	88.1107	7	0.112031		Cluster1
1020	MAP3K3	87.975	83.3137	4	0.729137
1021	HIST1H4J	87.9632	88.388	2	0.779128
1022	MYO18B	87.9514	91.6214	2	0.566004
1023	LARS	87.9396	72.2917	3	2.17334	CLIP	Cluster21
1024	RPS13	87.9278	96.3418	12	-0.800907	RNA	Cluster14
1025	RPL11	87.916	91.5742	8	-0.122315	RNA	Cluster14
1026	SKP1	87.9042	97.6752	12	-1.01345		Cluster8
1027	AP5Z1	87.8924	82.051	4	0.854926
1028	ATP5C1	87.8806	84.1574	2	1.14587
1029	UBE2S	87.8688	86.7713	4	0.483593
1030	VCAM1	87.857	82.818	3	0.959179
1031	NEDD1	87.8452	89.8218	9	-0.0638035
1032	RPS16	87.8334	93.6394	10	-0.413652		Cluster14
1033	CTR9	87.8216	71.8079	3	2.22037	CLIP	Cluster26
1034	TBL1XR1	87.8098	93.9462	13	-0.542947		Cluster27
1035	SF3B5	87.798	96.448	16	-0.928062		Cluster26
1036	IFIT1	87.7862	73.0411	3	2.01403
1037	CUL2	87.7744	80.7883	2	1.45856	CLIP	Cluster5
1038	SDCCAG8	87.7626	89.8808	9	-0.0847392
1039	EEF1A1	87.7508	96.1234	3	-0.126419		Cluster9
1040	PTPRF	87.739	72.7165	2	3.10993	CLIP	Cluster42
1041	QARS	87.7272	72.2799	3	2.08907	CLIP	Cluster21
1042	E2F6	87.7154	87.3141	6	0.188427
1043	SCRIB	87.7036	69.5008	3	2.61206	CLIP	Cluster20
1044	HSPBP1	87.6918	75.4661	2	2.17497
1045	LSM7	87.68	91.3618	4	0.0707311		Cluster26
1046	PSMC1	87.6682	89.5917	5	0.0672104
1047	CDCA8	87.6564	89.2436	11	-0.131652
1048	POLR3C	87.6446	83.4081	4	0.665068
1049	ADAM15	87.6328	72.5041	2	3.1218	CLIP	Cluster25
1050	AIFM1	87.621	83.6323	2	1.13593
1051	APEX1	87.6092	82.9714	3	0.891148		Cluster30
1052	PSEN1	87.5974	91.1022	8	-0.141708		Cluster1
1053	DVL3	87.5856	85.1546	4	0.541809
1054	PACS1	87.5738	73.9674	2	2.38697	CLIP	Cluster19
1055	SYCE2	87.562	84.6	4	0.567898
1056	STAT2	87.5502	79.0477	5	0.906148
1057	CENPO	87.5384	93.1968	12	-0.497696		Cluster18
1058	THRA	87.5266	82.4404	7	0.524544
1059	FBXW7	87.5148	89.4855	5	0.0575774
1060	SYCP3	87.5029	92.2469	5	-0.0918136
1061	FOS	87.4911	88.1107	7	0.014386
1062	DARS	87.4793	75.773	5	1.20298		Cluster21
1063	LATS2	87.4675	88.388	1	1.40753		Cluster45
1064	H3F3A	87.4557	99.5988	17	-2.30881		Cluster16
1065	CEP135	87.4439	89.8808	9	-0.118526
1066	FZR1	87.4321	84.1043	4	0.593466
1067	TGS1	87.4203	75.7612	4	1.33853
1068	PLCG2	87.4085	74.7935	2	2.19172
1069	EXOSC1	87.3967	79.0772	3	1.21452
1070	SNRPF	87.3849	98.2476	18	-1.474		Cluster26
1071	RPL12	87.3731	91.2084	8	-0.174826	RNA	Cluster14
1072	MMP2	87.3613	83.7621	2	1.08364
1073	FBLN2	87.3495	70.0614	3	2.31882
1074	KCNQ3	87.3377	86.1341	4	0.450056		Cluster45
1075	DNAJC2	87.32	86.7595	1	1.56845		Cluster43
1076	AQR	87.32	74.6401	2	2.18211	CLIP	Cluster26
1077	CAMK2G	87.3023	90.2879	3	0.285138
1078	PRKCD	87.2905	74.8761	3	1.64826
1079	ANAPC11	87.2787	86.0042	4	0.458396
1080	GNAI2	87.2669	86.9365	2	0.805363		Cluster45
1081	PTN	87.2551	72.7933	2	2.65634
1082	SIRPA	87.2433	78.3809	2	1.63493
1083	SHOC2	87.2315	82.3224	2	1.24595
1084	LEO1	87.2197	76.8114	4	1.20392
1085	HNRNPA2B1	87.2079	96.1411	17	-1.02892		Cluster26
1086	CHD1L	87.1902	76.0267	3	1.49492
1087	RPS9	87.1902	93.4624	10	-0.495788	RNA	Cluster14
1088	PTPRD	87.1666	76.4456	3	1.44634	CLIP	Cluster25
1089	TLE1	87.1666	79.2896	3	1.17158		Cluster45
1090	CENPH	87.1489	93.1968	12	-0.555688		Cluster18
1091	SREBF1	87.1371	73.3538	5	1.38688		Cluster45
1092	POLB	87.1253	92.7779	10	-0.432021		Cluster27
1093	CUL4A	87.1135	85.4496	4	0.480976
1094	ERCC6	87.1017	79.5728	3	1.14401
1095	EPS15	87.0899	89.0135	4	0.183913		Cluster19
1096	NEDD9	87.0781	70.9169	3	2.11913		Cluster1
1097	RHOG	87.0663	79.8206	3	1.11619		Cluster1
1098	RFC5	87.0545	94.4949	8	-0.521736		Cluster4
1099	HNRNPD	87.0368	97.2976	18	-1.31131		Cluster26
1100	LRP8	87.0368	81.4491	3	0.952681
1101	TAF2	87.0191	78.9356	5	0.83891
1102	HNRNPA1	87.0073	98.1886	10	-1.19555		Cluster21
1103	CDKN1A	86.9955	95.7635	10	-0.815346		Cluster35
1104	PSME1	86.9837	85.249	4	0.472645
1105	SIN3B	86.9719	78.5225	2	1.56457
1106	RXRG	86.9601	71.566	2	2.92953
1107	TNKS	86.9483	78.3219	2	1.57712	CLIP&RNA	Cluster23
1108	MYB	86.9365	83.6205	5	0.453249
1109	GTF2H1	86.9247	93.2853	9	-0.461341
1110	BUB3	86.9129	93.899	13	-0.702765		Cluster18
1111	PRKAR1A	86.8952	95.439	3	-0.165633
1112	VKORC1L1	86.8952	97.8287	5	-0.748177		Cluster36
1113	PSMB8	86.8775	85.2608	4	0.456208
1114	FGFR3	86.8657	72.5159	3	1.85539	CLIP&RNA	Cluster42
1115	PLD2	86.8539	77.9561	3	1.25802
1116	GSK3A	86.8421	86.1577	3	0.543056
1117	DCC	86.8303	87.5856	6	0.0294179	RNA	Cluster38
1118	CCDC94	86.8185	73.932	3	1.64527
1119	PA2G4	86.8067	89.3439	3	0.284252
1120	PDCL3	86.7949	79.7026	2	1.41405
1121	SMC2	86.7831	81.0479	2	1.27732		Cluster45
1122	NFKBIA	86.7713	88.8246	7	-0.0569893
1123	PINK1	86.7595	75.9795	3	1.42033
1124	DYNC2H1	86.7477	73.8258	2	2.13723	CLIP	Cluster27
1125	PCBP2	86.7359	97.3094	18	-1.43275		Cluster26
1126	TFDP1	86.7241	86.0219	6	0.164944
1127	CXCR4	86.7123	80.4107	4	0.796951
1128	NR4A1	86.7005	74.7168	4	1.31032
1129	DOCK4	86.6887	79.7144	1	2.6219	CLIP	Cluster14
1130	PSMA3	86.6769	89.5091	6	-0.0676947	RNA	Cluster45
1131	CDH11	86.6651	75.0767	4	1.28122
1132	POLR3A	86.6533	71.5955	2	2.63692	CLIP	Cluster26
1133	PHKB	86.6415	82.5584	1	1.97514	CLIP	Cluster6
1134	YWHAQ	86.6297	91.763	5	-0.150261		Cluster1
1135	FBXO31	86.6179	77.6847	4	1.03342
1136	PSMB7	86.6002	86.9483	4	0.264453
1137	THRAP3	86.6002	69.3179	4	1.83985	CLIP	Cluster31
1138	CENPP	86.5825	93.1968	12	-0.662743		Cluster18
1139	HLA-B	86.5707	93.9934	5	-0.356293
1140	SAP130	86.5589	73.4954	3	1.65447	CLIP	Cluster33
1141	PPARGC1B	86.5471	75.2478	5	1.12424
1142	CDON	86.5294	88.6712	7	-0.0755706		Cluster38
1143	PSMD5	86.5294	85.2254	4	0.400428
1144	POLR3GL	86.5117	74.0205	3	1.56007
1145	MYH10	86.4999	79.03	1	2.72691	CLIP	Cluster17
1146	KLC1	86.4881	96.4716	4	-0.484993		Cluster27
1147	EXOC4	86.4763	80.2337	1	2.37875	CLIP	Cluster20
1148	BCS1L	86.4645	87.5089	1	1.32348
1149	POLR1B	86.4527	74.1208	2	2.00881	CLIP	Cluster26
1150	RPS19	86.4409	93.9344	10	-0.679548	RNA	Cluster14
1151	MLST8	86.4291	84.8478	3	0.567224
1152	RPS8	86.4173	93.8282	10	-0.67705		Cluster14
1153	RPL5	86.4055	94.6188	10	-0.786973		Cluster14
1154	HIST4H4	86.3937	88.5886	2	0.556966
1155	TRIP6	86.3819	75.5074	2	1.8164
1156	GTF3C4	86.3701	73.2653	3	1.65031		Cluster45
1157	ARNT	86.3583	77.8145	5	0.84947
1158	NOL10	86.3465	84.1869	2	0.897735
1159	CTBP2	86.3347	91.9047	5	-0.194597
1160	MAML1	86.3229	80.8473	5	0.597108
1161	SRPK2	86.3111	83.5379	2	0.943716
1162	PSMD9	86.2993	85.2844	4	0.359733
1163	SNRPG	86.2875	98.0234	18	-1.8758	RNA	Cluster26
1164	KIAA0368	86.2757	71.7135	2	2.42544	CLIP	Cluster9
1165	AP1M1	86.258	80.806	4	0.702801
1166	FEZ1	86.258	78.6523	2	1.40993
1167	NCAM1	86.2403	96.9436	10	-1.13923	RNA	Cluster11
1168	GJA1	86.2285	97.2504	7	-0.965386	RNA	Cluster42
1169	TMEM8A	86.2167	83.3255	1	1.71754
1170	CENPQ	86.2049	93.1968	12	-0.735529		Cluster18
1171	PLAUR	86.1931	85.5204	6	0.123319
1172	RBM28	86.1813	97.8051	6	-1.00397		Cluster37
1173	WRN	86.1695	83.4907	5	0.34231
1174	CDKN1B	86.1577	92.2941	5	-0.262547		Cluster35
1175	ALPL	86.1459	87.9986	2	0.559643
1176	RBM17	86.1341	81.5081	3	0.812076
1177	SRSF7	86.1223	95.3033	15	-1.09417		Cluster26
1178	YWHAG	86.1105	95.793	13	-1.13424		Cluster27
1179	CD44	86.0987	98.8199	11	-1.96254		Cluster3
1180	EIF4E	86.0869	99.0441	9	-1.72213		Cluster43
1181	AKT2	86.0751	90.4768	3	0.081086		Cluster1
1182	CNEP1R1	86.0633	81.5612	2	1.11694
1183	SORBS3	86.0515	84.0217	3	0.581982
1184	ING5	86.0337	83.8683	5	0.291808		Cluster32
1185	EPHA3	86.0337	78.794	3	1.02236	RNA	Cluster25
1186	STRN3	86.016	79.1126	2	1.32127
1187	DEPTOR	86.0042	88.8777	3	0.203261		Cluster29
1188	ATP6V1D	85.9924	86.5589	3	0.396047
1189	ARL3	85.9806	87.9396	8	-0.144831		Cluster27
1190	ACLY	85.9688	77.9679	1	2.77504	CLIP	Cluster9
1191	GDNF	85.957	82.8298	4	0.510291
1192	TUFM	85.9452	80.3045	1	2.13978
1193	TONSL	85.9334	74.3215	5	1.0749
1194	DOCK9	85.9216	74.2034	2	1.84365
1195	CKAP4	85.9098	79.0477	2	1.30747
1196	APP	85.898	87.5089	2	0.56006
1197	FKBP8	85.8862	78.0033	3	1.08529
1198	MAP2K4	85.8744	90.223	6	-0.21163
1199	KLHL9	85.8626	72.0026	3	1.67173	CLIP	Cluster27
1200	GEMIN4	85.8449	80.1156	1	2.15297		Cluster26
1201	MAST4	85.8449	80.3753	1	2.09465	CLIP	Cluster20
1202	ATP5B	85.8272	78.4399	1	2.52609	CLIP	Cluster7
1203	SDAD1	85.8154	93.8754	3	-0.177081
1204	TAPBPL	85.8036	99.7286	1	-0.0038771		Cluster42
1205	CDH8	85.7918	75.0767	4	1.14346
1206	ITCH	85.78	86.6769	3	0.350482
1207	CACNA1I	85.7682	82.169	2	1.01267
1208	SEC23B	85.7564	68.4565	3	2.06882	CLIP	Cluster19
1209	MYLK	85.7446	76.9589	1	3.2955	CLIP	Cluster20
1210	SRSF5	85.7328	95.7517	16	-1.31473		Cluster26
1211	OFD1	85.721	91.7276	10	-0.533208
1212	PSMA2	85.7092	98.9379	12	-2.63617		Cluster9
1213	STAM	85.6974	81.756	4	0.570589
1214	PSMD11	85.6856	88.4116	5	-0.051115
1215	SRSF2	85.6738	95.852	15	-1.31901		Cluster26
1216	RPS7	85.662	95.1853	11	-1.05927	RNA	Cluster14
1217	COPS2	85.6502	79.9386	4	0.693105
1218	BACH2	85.6384	78.6287	2	1.30333		Cluster45
1219	CSNK1E	85.6266	93.126	10	-0.740789
1220	GTF3C5	85.6148	73.2653	3	1.49295
1221	RPL18	85.603	91.586	8	-0.424595
1222	SIRT2	85.5912	89.9575	2	0.347997
1223	MAP2K7	85.5794	86.7123	4	0.14958
1224	ESR1	85.5676	99.9056	36	NA		Cluster31
1225	FBXO27	85.5558	77.6847	4	0.872597
1226	SEMA3F	85.544	78.4045	2	1.31447		Cluster1
1227	NUF2	85.5322	89.3203	10	-0.366794		Cluster18
1228	RPS29	85.5204	93.7043	10	-0.84552	RNA	Cluster14
1229	EFNA1	85.5086	89.1551	5	-0.127165
1230	MAX	85.4968	96.1824	11	-1.28481		Cluster16
1231	TCERG1	85.485	78.4989	4	0.768465
1232	FKBP4	85.4732	76.2332	2	1.50684	CLIP	Cluster27
1233	RPL30	85.4614	92.9549	9	-0.705012	RNA	Cluster14
1234	RNF113A	85.4496	72.87	3	1.48249
1235	RPL36	85.4378	91.2615	8	-0.440013		Cluster14
1236	TAF5L	85.426	75.3835	4	1.04718
1237	EPN1	85.4142	80.275	3	0.79387
1238	CBLB	85.4024	81.1187	3	0.717561
1239	C6orf47	85.3847	92.5478	1	0.683422
1240	NELL2	85.3847	75.3245	2	1.60158	CLIP	Cluster28
1241	LMOD1	85.367	84.2105	3	0.477411
1242	FHOD1	85.3552	70.0437	2	2.31039
1243	PTPRZ1	85.3375	70.3564	2	2.24401	CLIP	Cluster39
1244	RBPJ	85.3375	92.5065	7	-0.557284
1245	DCAF13	85.3198	74.1326	2	1.68883	CLIP	Cluster37
1246	U2AF1	85.308	97.1383	16	-1.95934		Cluster26
1247	STRIP1	85.2962	77.1654	2	1.39459	CLIP	Cluster36
1248	PSMA7	85.2844	88.2582	5	-0.0993777
1249	NCALD	85.2726	88.742	12	-0.451281		Cluster19
1250	NSA2	85.2608	94.7132	4	-0.519977
1251	MAP1S	85.249	76.1093	1	3.04821	CLIP	Cluster25
1252	CENPA	85.2372	93.9698	12	-1.03838		Cluster18
1253	SMC4	85.2254	77.3189	3	1.03462		Cluster45
1254	SRSF1	85.2136	97.1383	17	-2.12383		Cluster26
1255	SH2D3C	85.2018	70.0142	2	2.23018
1256	STIP1	85.19	72.7047	2	1.8717
1257	PPL	85.1723	76.3984	1	2.79372
1258	B9D2	85.1723	87.7685	10	-0.323199
1259	GTF3C2	85.1546	73.2653	3	1.38554		Cluster45
1260	MET	85.1428	89.1433	5	-0.177951		Cluster1
1261	BAX	85.131	89.5327	4	-0.0922637
1262	VEGFA	85.1192	94.9434	7	-0.903705	RNA	Cluster42
1263	AMPH	85.1074	72.5749	2	1.87565		Cluster45
1264	CAPZA2	85.0956	95.439	1	0.402336		Cluster45
1265	SUPT20H	85.0838	75.3835	4	0.984212
1266	ATP5A1	85.072	78.0269	1	2.26697	CLIP	Cluster7
1267	NCR1	85.0602	96.1529	8	-1.14934		Cluster16
1268	DHX16	85.0484	68.5863	3	1.8178		Cluster45
1269	FGF2	85.0366	98.8081	7	-1.89133		Cluster42
1270	TAF1B	85.0248	75.0295	3	1.1977
1271	FLOT1	85.013	78.1213	2	1.24375
1272	TPM2	85.0012	84.1751	4	0.246881
1273	ARHGEF7	84.9894	88.5178	6	-0.216998		Cluster1
1274	TGM2	84.9776	72.0734	2	1.91752		Cluster45
1275	CEP70	84.9658	89.8808	9	-0.457628
1276	TNPO1	84.954	75.7021	3	1.14236
1277	WDR77	84.9422	88.4706	2	0.34568
1278	EEF1B2	84.9304	98.0529	1	0.0900384	RNA	Cluster9
1279	SKA3	84.9186	90.2525	9	-0.494154
1280	RPS24	84.9068	93.663	10	-0.955923	RNA	Cluster14
1281	GPANK1	84.895	91.4444	2	0.133388
1282	E2F1	84.8714	89.7215	6	-0.315577		Cluster2
1283	NF1	84.8714	78.0977	2	1.23021	CLIP	Cluster25
1284	BNIP2	84.8714	86.3937	7	-0.119755
1285	PPP1R12C	84.8478	81.9212	3	0.602963		Cluster35
1286	SDC2	84.836	88.9781	5	-0.192145		Cluster1
1287	RPL27A	84.8242	92.7071	9	-0.774137	RNA	Cluster14
1288	YWHAB	84.8124	94.8667	7	-0.930484		Cluster39
1289	INS-IGF2	84.8006	99.8348	19	NA		Cluster14
1290	RPL18A	84.7888	90.9783	8	-0.515377
1291	WDR75	84.777	85.072	2	0.593801
1292	PRKG1	84.7652	84.1161	2	0.653826
1293	NUDT21	84.7534	95.1617	15	-1.46796		Cluster26
1294	RPL29	84.7357	90.7246	8	-0.51173	RNA	Cluster14
1295	CGN	84.7357	81.4196	3	0.614584
1296	SARS2	84.718	84.2931	5	0.062702
1297	APOE	84.7062	83.0776	3	0.485661
1298	CLK2	84.6885	74.0736	3	1.23745
1299	RTN1	84.6885	95.8225	1	0.313645	RNA	Cluster13
1300	OS9	84.6708	88.6476	2	0.307352
1301	AXIN2	84.659	78.7586	3	0.823005
1302	CDH24	84.6472	75.0767	4	0.960732
1303	SQSTM1	84.6354	83.7503	2	0.668031
1304	RPL23	84.6236	91.3795	8	-0.57492	RNA	Cluster14
1305	PRKAR1B	84.6059	81.3606	1	1.65404
1306	BECN1	84.6059	78.9061	1	1.98237
1307	RPL35A	84.5882	90.9783	8	-0.55004	RNA	Cluster14
1308	RICTOR	84.5764	74.6637	3	1.16834	CLIP	Cluster29
1309	AGO1	84.5587	93.545	2	-0.0541286
1310	CACNA1H	84.5587	76.4338	1	2.48311	CLIP	Cluster6
1311	EIF5	84.5409	90.9075	4	-0.24005
1312	SAP30	84.5291	91.4326	9	-0.642825		Cluster34
1313	FZD1	84.5173	72.5395	3	1.3746
1314	CSNK2B	84.5055	93.8164	3	-0.335041		Cluster28
1315	CTNNBL1	84.4937	76.3866	1	2.46973	CLIP	Cluster26
1316	ZBTB17	84.4819	72.1973	2	1.78669
1317	ISY1	84.4701	92.3177	6	-0.592736
1318	CDH10	84.4583	75.0767	4	0.944861
1319	DDX55	84.4465	94.0524	4	-0.554234
1320	MYO9A	84.4347	79.7734	1	1.83797	CLIP	Cluster24
1321	UTP18	84.4229	77.1182	2	1.27343
1322	ZCCHC10	84.4111	90.5476	5	-0.348329
1323	IMP3	84.3993	89.7923	2	0.193913
1324	SRSF6	84.3875	96.1234	16	-2.01677		Cluster26
1325	PPARGC1A	84.3757	90.7482	11	-0.747038		Cluster2
1326	RNF2	84.3639	90.7954	8	-0.578232		Cluster2
1327	PIKFYVE	84.3521	69.6247	3	1.57393	CLIP	Cluster42
1328	CACNB3	84.3403	82.169	2	0.795024
1329	TBC1D4	84.3285	73.755	2	1.56045
1330	KLHL7	84.3167	70.2325	3	1.51581	CLIP	Cluster27
1331	COPZ1	84.3049	87.1253	11	-0.428009		Cluster19
1332	ATIC	84.2931	67.0522	2	2.44467	CLIP	Cluster42
1333	AAR2	84.2813	68.2086	2	2.24659
1334	DNAJB1	84.2695	82.5761	2	0.724609
1335	PTEN	84.2577	92.4947	5	-0.591207		Cluster30
1336	RPLP1	84.2459	91.0432	8	-0.619371		Cluster14
1337	NUAK1	84.2341	72.7283	3	1.29271		Cluster45
1338	CHEK2	84.2223	70.2148	2	1.95135
1339	TGFBR2	84.2105	86.2344	3	0.159211
1340	GAB1	84.1987	79.5846	4	0.528113
1341	DLD	84.1869	82.995	1	1.37321
1342	PKD1	84.1751	71.2827	2	1.80504		Cluster45
1343	CCNH	84.1633	93.84	9	-1.07423
1344	CENPC	84.1515	89.2082	11	-0.640717		Cluster18
1345	USP10	84.1397	72.2563	2	1.68124	CLIP	Cluster37
1346	C17orf49	84.1279	90.4886	9	-0.655153
1347	NGF	84.1161	96.4834	11	-2.00545		Cluster1
1348	NELFE	84.1043	73.578	3	1.17731
1349	CCNA1	84.0925	69.2943	2	2.00844
1350	RPA3	84.0807	94.4064	8	-1.10687		Cluster35
1351	SF1	84.0689	84.3285	4	0.0840047
1352	EXOC6B	84.0571	78.3691	2	1.06767
1353	FGF4	84.0453	84.836	2	0.510291
1354	RRS1	84.0335	77.13	1	2.10702
1355	EXO1	84.0217	67.005	2	2.31507
1356	SLIT2	84.0099	73.9202	2	1.46378	CLIP	Cluster42
1357	RPL35	83.9981	90.2525	8	-0.601882	RNA	Cluster14
1358	MEAF6	83.9804	90.7836	9	-0.721855		Cluster16
1359	VASP	83.9804	88.5768	4	-0.176677
1360	ZNF830	83.9627	83.8211	4	0.111746
1361	SENP1	83.945	87.7862	2	0.268193		Cluster30
1362	MED19	83.945	83.2547	10	-0.15134
1363	EPS15L1	83.9273	78.9592	3	0.678279
1364	CAPG	83.9155	96.5424	1	0.119301		Cluster45
1365	RPS23	83.9037	93.722	10	-1.18852		Cluster14
1366	PTGES3	83.8919	95.3859	6	-1.13606		Cluster44
1367	RPLP2	83.8801	90.9252	8	-0.69661
1368	DNA2	83.8683	83.6677	3	0.28261		Cluster35
1369	SMARCA1	83.8565	66.9814	2	2.22949	CLIP	Cluster34
1370	AP1M2	83.8447	79.1598	5	0.372476
1371	BPTF	83.8329	70.4272	2	1.79041	CLIP	Cluster34
1372	ARFGEF1	83.8211	83.2252	1	1.26923	CLIP	Cluster8
1373	CEP41	83.8093	89.8808	9	-0.669757
1374	ARRB2	83.7975	89.5445	3	-0.115762		Cluster5
1375	AFAP1L1	83.7857	73.5308	2	1.47089
1376	RBM4	83.7739	95.6219	9	-1.56706		Cluster26
1377	ZWILCH	83.7621	87.6564	10	-0.526604
1378	NTM	83.7503	69.017	2	1.94801
1379	ADCY9	83.7385	67.6127	2	2.12692		Cluster45
1380	GAS6	83.7267	66.2379	3	1.75145
1381	CNOT3	83.7149	78.6878	2	0.969463		Cluster23
1382	GTF3C3	83.7031	68.7279	2	1.97616	CLIP	Cluster26
1383	ELMO2	83.6913	75.7848	2	1.24056
1384	BANF1	83.6795	90.3528	11	-0.867207		Cluster18
1385	PABPN1	83.6677	95.3151	15	-2.17397		Cluster26
1386	EIF3H	83.6559	91.5211	4	-0.423934
1387	STARD13	83.6441	72.0911	2	1.587
1388	POLR2F	83.6323	99.0264	22	NA		Cluster26
1389	MAGI2	83.6205	82.0274	4	0.23996
1390	FLT3	83.6087	76.5518	2	1.14803
1391	DNMT3B	83.5969	76.245	3	0.849904
1392	TADA2B	83.5851	75.3835	4	0.740724
1393	RALBP1	83.5733	75.6431	1	2.1967	CLIP	Cluster19
1394	PDGFB	83.5615	93.362	7	-1.01745
1395	TYK2	83.5497	79.1362	3	0.605476
1396	EIF4EBP3	83.5379	97.3566	4	-1.25526		Cluster43
1397	WBP11	83.5261	74.764	2	1.28914
1398	MAPK3	83.5143	81.0951	3	0.470511
1399	ADCY5	83.4966	67.6127	2	2.02266		Cluster45
1400	EYA2	83.4966	74.0972	2	1.33459
1401	RBBP6	83.4789	79.9976	2	0.819515		Cluster45
1402	PPP4R1	83.4671	77.4605	1	1.86095	CLIP	Cluster36
1403	CRKL	83.4553	84.5528	5	-0.0904246
1404	APPL1	83.4435	83.178	3	0.261846
1405	FGF8	83.4317	92.5478	1	0.416437
1406	EIF4EBP1	83.4199	82.6115	5	0.0111953
1407	RBM14	83.4081	74.8171	5	0.63258
1408	SRSF3	83.3963	95.3269	15	-2.45174		Cluster26
1409	FGFR1OP	83.3845	94.9257	11	-1.89664
1410	TUBB1	83.3727	99.882	8	NA		Cluster36
1411	DEPDC1	83.3609	85.4378	4	-0.0304476
1412	BAZ1A	83.3491	70.3741	2	1.67965		Cluster45
1413	ERCC4	83.3373	81.7796	4	0.216105
1414	ATR	83.3255	76.2804	2	1.12343		Cluster2
1415	ADCY1	83.3137	69.6601	2	1.7243		Cluster45
1416	EPC1	83.3019	82.3519	4	0.175452
1417	DIS3L	83.2901	67.9431	2	1.94415		Cluster45
1418	MEN1	83.2783	78.7822	4	0.448188
1419	PAXIP1	83.2606	76.7996	3	0.746091		Cluster2
1420	CYC1	83.2606	81.2249	1	1.37585
1421	E2F2	83.2429	73.4718	2	1.37255
1422	KLHL20	83.2311	77.2363	4	0.559454
1423	UBE2C	83.2193	85.013	4	-0.0288086
1424	PLXNB2	83.2075	72.5513	1	2.90442	CLIP	Cluster20
1425	CASP3	83.1957	82.8534	3	0.262497		Cluster1
1426	LTBP2	83.1839	66.7689	2	2.029
1427	RB1CC1	83.1721	71.1293	2	1.56522	CLIP	Cluster32
1428	IRF3	83.1603	82.405	4	0.137466
1429	YEATS4	83.1485	86.8657	5	-0.283126
1430	PPP1R10	83.1367	81.5612	2	0.628812
1431	VHL	83.1249	96.5188	7	-1.92294		Cluster5
1432	ELP3	83.1013	72.6398	2	1.41785
1433	NKAP	83.1013	78.9474	2	0.830706
1434	PFKM	83.1013	73.9438	1	2.30393	CLIP
1435	PHF21A	83.0776	87.8688	8	-0.564714
1436	OCRL	83.0658	63.7597	2	2.54859	CLIP	Cluster7
1437	CUL4B	83.054	74.2565	3	0.919		Cluster45
1438	UNC5B	83.0422	87.7685	2	0.112057
1439	FGFR2	83.0304	75.6903	1	2.00686	CLIP	Cluster42
1440	PPP2R4	83.0186	98.9733	13	NA		Cluster29
1441	NGEF	83.0068	82.5348	2	0.545503
1442	INTS10	82.995	66.1435	2	2.06505
1443	CDC7	82.9832	88.1402	5	-0.41695		Cluster35
1444	EGR1	82.9714	88.2936	4	-0.317541
1445	TDP1	82.9596	71.4539	2	1.48723
1446	DYNC1LI2	82.9478	83.2252	3	0.185051
1447	B2M	82.936	92.1171	9	-1.13796	RNA	Cluster19
1448	RALA	82.9242	92.0758	4	-0.640819		Cluster1
1449	FBXL15	82.9124	77.6847	4	0.474428
1450	WWTR1	82.9006	91.0314	2	-0.0923883		Cluster45
1451	G3BP1	82.8888	91.8928	4	-0.619538
1452	HUWE1	82.877	70.7222	1	3.73172	CLIP	Cluster32
1453	EXOSC6	82.8652	92.9667	5	-0.947389		Cluster10
1454	INO80C	82.8534	86.4291	6	-0.372774
1455	WWOX	82.8416	77.3543	2	0.921074
1456	TNIK	82.8298	66.173	2	1.98455		Cluster45
1457	ELL	82.818	78.8648	3	0.513762
1458	PPP4R4	82.8062	81.5612	2	0.579023
1459	CENPN	82.7944	93.1968	12	-1.75587		Cluster18
1460	SUPV3L1	82.7826	67.9431	2	1.75919		Cluster45
1461	USP1	82.7708	66.9578	2	1.86387	CLIP	Cluster4
1462	CORO1A	82.759	89.0843	8	-0.761655		Cluster24
1463	CLIC1	82.7472	81.1305	2	0.601055
1464	TSC1	82.7354	79.9504	3	0.427588
1465	PAK4	82.7236	84.0925	1	0.973025
1466	ABL2	82.7118	76.5636	4	0.521053
1467	RAD51	82.7	91.0668	7	-0.899798		Cluster2
1468	FBXL3	82.6882	78.2747	4	0.385794
1469	WASL	82.6764	90.1227	4	-0.492809		Cluster1
1470	CAMK2B	82.6646	82.7118	2	0.478132
1471	PSMA6	82.6528	86.8362	4	-0.242339
1472	ALK	82.641	71.324	3	1.07706
1473	SH3PXD2A	82.6292	77.7437	3	0.566342
1474	PAK2	82.6174	83.8801	2	0.326333		Cluster1
1475	TADA1	82.6056	75.3835	4	0.579262
1476	FRS3	82.5938	73.3066	3	0.912391
1477	HSPG2	82.582	76.0031	1	1.78359	CLIP	Cluster42
1478	AIMP1	82.5702	79.8914	5	0.0795183		Cluster21
1479	POLM	82.5584	79.502	2	0.679872
1480	OPTN	82.5466	77.9207	2	0.817313		Cluster41
1481	SAP18	82.5348	91.6568	8	-1.10071		Cluster34
1482	TAF10	82.523	86.5117	6	-0.437674
1483	ARHGAP32	82.5112	70.9582	4	0.890645		Cluster45
1484	SPEN	82.4994	65.2348	2	2.01449	CLIP	Cluster34
1485	USP16	82.4876	76.599	2	0.919974
1486	PRKCI	82.4699	77.7909	3	0.541854		Cluster45
1487	CCNT1	82.4699	86.3583	4	-0.241351
1488	PKP4	82.4522	70.262	2	1.46634		Cluster45
1489	LSM3	82.4404	88.0222	5	-0.530571	RNA	Cluster26
1490	TEC	82.4286	79.9858	2	0.631504
1491	RPS6KA2	82.4168	71.5483	2	1.35121		Cluster19
1492	CENPK	82.405	93.3798	12	-2.11173		Cluster18
1493	OGFOD1	82.3932	73.6606	1	2.07976		Cluster45
1494	STON2	82.3814	64.692	2	2.04315		Cluster45
1495	SETD1B	82.3696	66.173	2	1.84863	CLIP	Cluster16
1496	RPS15A	82.3578	93.6748	10	-1.95008	RNA	Cluster14
1497	TBKBP1	82.346	91.2792	1	0.369331
1498	ANAPC4	82.3342	85.131	4	-0.181509
1499	NRP2	82.3224	86.7949	1	0.683472		Cluster1
1500	SLC9A3R2	82.3106	78.2039	2	0.74768
1501	TGFBR1	82.2988	85.3729	3	-0.0418797
1502	PIK3R3	82.287	83.1249	6	-0.215822		Cluster1
1503	ABCD1	82.2752	76.6344	1	1.65021		Cluster45
1504	KCTD10	82.2634	79.3604	4	0.214568
1505	HIST1H2BD	82.2516	69.0465	3	1.18029	RNA	Cluster45
1506	RAB3GAP2	82.2398	70.2974	2	1.43058	CLIP	Cluster6
1507	FKBP1B	82.228	80.6231	2	0.561147
1508	PPP2R5A	82.2162	83.2783	2	0.335046
1509	DNAJC16	82.2044	88.9308	4	-0.476393
1510	FANCA	82.1926	76.894	4	0.412348		Cluster45
1511	PTPRS	82.1808	69.5539	1	3.02693	CLIP	Cluster42
1512	CBX4	82.169	70.0024	2	1.43435
1513	THOC5	82.1572	84.3403	1	0.848522
1514	DCTN4	82.1454	86.8893	4	-0.328019
1515	ATP6V1E1	82.1336	86.4586	3	-0.141431
1516	USP22	82.1218	71.3004	3	0.998555	CLIP	Cluster33
1517	PMS2	82.11	73.5131	2	1.14338
1518	ECT2	82.0982	76.2214	2	0.898372
1519	NFYC	82.0864	88.6122	4	-0.476295		Cluster2
1520	CNOT1	82.0746	70.085	1	2.73545	CLIP	Cluster23
1521	DLC1	82.0628	63.8423	2	2.08423
1522	KRR1	82.051	92.1643	4	-0.845674
1523	RPL37A	82.0392	90.76	8	-1.1137	RNA	Cluster14
1524	TCF19	82.0274	76.5872	2	0.852119		Cluster45
1525	MAP3K7	82.0156	81.0597	3	0.218945
1526	ATP6V1F	82.0038	86.5589	3	-0.16199
1527	VAC14	81.992	60.8921	2	2.62772	CLIP	Cluster42
1528	ITGB3BP	81.9802	77.4487	2	0.772309
1529	PARK7	81.9684	81.1541	2	0.493034		Cluster45
1530	POLR3H	81.9566	76.1506	4	0.447532
1531	CACNA1E	81.9448	80.6231	2	0.526499
1532	CDH1	81.933	96.9731	18	NA		Cluster20
1533	WDR3	81.9212	74.4985	1	1.81937	CLIP	Cluster37
1534	POLR3E	81.9094	74.469	3	0.706107
1535	EFNA2	81.8976	76.9235	1	1.53952
1536	MSH3	81.8858	64.7038	2	1.92754	CLIP	Cluster4
1537	SVIL	81.874	70.9995	1	2.39812	CLIP	Cluster20
1538	CD74	81.8622	91.0904	10	-1.3616		Cluster19
1539	RHOQ	81.8504	92.8487	8	-1.58615		Cluster24
1540	HDAC10	81.8386	86.0633	7	-0.571579
1541	MED6	81.8268	89.5563	13	-1.32519		Cluster2
1542	RPS10	81.815	93.8872	10	-2.54997		Cluster14
1543	BRD4	81.8032	69.5834	2	1.40055	CLIP	Cluster27
1544	MAP4K4	81.7914	63.7007	2	2.02013	CLIP	Cluster20
1545	YWHAZ	81.7796	92.0935	6	-1.18296		Cluster1
1546	WDHD1	81.7678	66.4503	2	1.66727	CLIP	Cluster4
1547	SOCS1	81.756	80.806	3	0.194341
1548	RNF20	81.7442	70.852	1	2.34305	CLIP	Cluster32
1549	ATP5F1	81.7324	84.0748	2	0.196972
1550	SCN2B	81.7206	94.253	1	0
1551	VCAN	81.7088	69.4005	2	1.39604	CLIP	Cluster3
1552	RAD23B	81.697	85.662	3	-0.138875
1553	RPL22	81.6852	91.2438	8	-1.24578
1554	GHR	81.6734	71.3595	3	0.919123
1555	PSMA5	81.6616	88.7302	5	-0.733895
1556	TRPC5	81.6498	87.3495	3	-0.274862
1557	TAF1A	81.638	73.8671	3	0.710217
1558	HEXIM1	81.6262	80.1629	2	0.519359
1559	FIG4	81.6144	60.8921	2	2.40969	CLIP	Cluster42
1560	DOK1	81.6025	71.0408	3	0.94367
1561	HAUS2	81.5907	89.4147	9	-1.12759
1562	PPP1R8	81.573	76.8704	3	0.496931
1563	ATP5O	81.573	83.9745	2	0.182856
1564	SIRT3	81.5553	80.092	2	0.519201
1565	AHR	81.5435	91.6686	7	-1.24375
1566	PTPN21	81.5317	76.0857	2	0.823505		Cluster1
1567	CREB1	81.5199	91.6332	6	-1.14936		Cluster1
1568	SMG9	81.5081	86.2875	4	-0.352834
1569	CEP57	81.4904	90.5004	9	-1.29362
1570	FIP1L1	81.4904	76.2922	2	0.799802
1571	FBL	81.4727	87.3377	2	-0.0394881
1572	S1PR3	81.4609	68.5509	1	2.78524		Cluster45
1573	C3orf58	81.4491	87.1253	11	-1.03758		Cluster19
1574	CSN1S1	81.4373	98.1886	9	NA		Cluster44
1575	RPL27	81.4255	91.0196	8	-1.29171	RNA	Cluster14
1576	MAK16	81.4137	87.8452	2	-0.0850382
1577	TIMELESS	81.4019	67.8782	1	3.00013	CLIP	Cluster4
1578	SNX4	81.3901	68.2794	1	2.86822
1579	POLA2	81.3783	74.6932	2	0.90685
1580	NEDD8	81.3665	84.895	4	-0.305887
1581	BBS7	81.3547	77.3779	2	0.68156
1582	ABHD16A	81.3429	88.9308	4	-0.643793
1583	HNRNPA1L2	81.3311	94.017	6	-1.92099		Cluster21
1584	PPT2	81.3193	95.4567	3	-1.2231		Cluster45
1585	YBX3	81.3016	83.5733	4	-0.210224
1586	HIST1H4C	81.3016	81.4845	2	0.362119	RNA	Cluster2
1587	DCTN5	81.2839	86.8893	4	-0.452755
1588	TP53BP2	81.2721	69.0347	1	2.48942	CLIP	Cluster32
1589	TCF7L2	81.2603	83.6972	6	-0.409137
1590	EPHA5	81.2426	80.9771	2	0.393836
1591	ORC4	81.2426	87.0663	4	-0.488709		Cluster35
1592	RRAS	81.2249	81.6025	5	-0.168895		Cluster1
1593	ESPN	81.2131	88.1107	7	-0.931851		Cluster24
1594	ORC6	81.2013	85.7564	4	-0.36226
1595	LRP1	81.1895	66.6332	1	3.60007	CLIP	Cluster25
1596	HDAC8	81.1777	87.7508	7	-0.891582
1597	ITGA2	81.1659	85.3021	4	-0.344212
1598	CNOT11	81.1541	78.6878	2	0.55216		Cluster23
1599	LZTS1	81.1423	74.0205	3	0.621593		Cluster45
1600	DTX1	81.1305	69.3651	1	2.37161
1601	AMER1	81.1187	71.7371	2	1.12871		Cluster8
1602	BMS1	81.1069	70.9169	1	2.10082	CLIP	Cluster41
1603	ANXA2	81.0951	84.7888	2	0.0189058		Cluster1
1604	NRIP1	81.0833	74.5221	1	1.63126	CLIP	Cluster34
1605	ABCD3	81.0715	82.3873	2	0.274697		Cluster45
1606	AKAP6	81.0597	67.9726	1	2.69736	CLIP&RNA	Cluster6
1607	CDC73	81.0479	77.9856	4	0.155627
1608	FBLN1	81.0361	68.6748	3	1.0135
1609	RPL38	81.0243	90.7128	8	-1.38731	RNA	Cluster14
1610	DYNLL1	81.0125	91.9578	5	-1.20165
1611	DDX56	81.0007	77.8027	1	1.29287
1612	TAX1BP1	80.9889	73.1119	1	1.80738	CLIP	Cluster41
1613	TMED3	80.9771	87.1253	11	-1.13274		Cluster19
1614	TOP3A	80.9653	69.1881	2	1.29978		Cluster45
1615	PPIE	80.9535	65.5535	2	1.60942
1616	DOCK11	80.9417	66.8338	1	3.02955	CLIP	Cluster38
1617	TNFAIP3	80.9299	73.8966	1	1.67776
1618	FANCG	80.9181	68.9285	2	1.31044		Cluster45
1619	PIK3C3	80.9063	72.5867	2	1.0336
1620	LPL	80.8945	79.9622	2	0.45501
1621	AGGF1	80.8827	77.7319	1	1.28845
1622	CDC25B	80.8709	73.9084	2	0.899749
1623	NHP2L1	80.8591	95.9346	15	NA		Cluster26
1624	SEC63	80.8473	88.1992	2	-0.178461
1625	SGIP1	80.8355	91.6863	13	-2.41651		Cluster19
1626	ELMO1	80.8237	74.9587	2	0.821684
1627	BDNF	80.8119	76.3453	3	0.44624
1628	POLL	80.8001	76.7052	2	0.67212
1629	POLR1D	80.7883	85.5971	6	-0.622749
1630	HIST2H2BF	80.7765	74.3628	3	0.581627
1631	RPL34	80.7647	90.8662	8	-1.48036	RNA	Cluster14
1632	CCND3	80.7529	80.6939	3	0.0629746		Cluster35
1633	ODC1	80.7411	68.3266	1	2.46507	CLIP	Cluster27
1634	ITGA9	80.7293	77.4251	2	0.608846
1635	TBCE	80.7175	88.0753	1	0.365893
1636	GBF1	80.7057	59.5882	2	2.31342	CLIP	Cluster7
1637	IGHMBP2	80.6939	60.9747	2	2.08141
1638	DOCK6	80.6821	66.8338	1	2.84287	CLIP	Cluster38
1639	CSTB	80.6703	92.9313	2	-0.596694
1640	PPP3CA	80.6526	81.9802	2	0.250485
1641	CCNC	80.6526	86.4173	10	-1.02119
1642	MED7	80.6349	87.2551	11	-1.21537
1643	MRE11A	80.6231	97.6752	8	NA		Cluster2
1644	RAB3GAP1	80.6054	64.928	2	1.60581	CLIP	Cluster6
1645	CAV1	80.6054	93.2617	6	-1.95043		Cluster1
1646	TNC	80.5877	74.1562	2	0.839571
1647	VAV3	80.5759	71.2178	2	1.09402
1648	EIF4A1	80.5641	98.4541	6	NA		Cluster43
1649	CACNA1D	80.5523	82.228	2	0.222409
1650	CCDC12	80.5405	82.0864	2	0.224127
1651	PTCH1	80.5287	77.0474	1	1.29111	CLIP	Cluster42
1652	IRF2BPL	80.5169	70.675	1	1.98934	CLIP	Cluster4
1653	RFC3	80.5051	92.654	7	-2.07103		Cluster4
1654	RPL9	80.4933	90.5122	8	-1.53258	RNA	Cluster14
1655	ELP2	80.4815	76.6226	4	0.188505
1656	RPL15	80.4697	90.5712	8	-1.57487
1657	CCNT2	80.4579	89.0489	5	-0.979316
1658	RPL31	80.4461	90.701	8	-1.60884	RNA	Cluster14
1659	FADD	80.4343	83.7326	2	0.0174083
1660	NIP7	80.4225	94.9021	2	-0.899328
1661	GRIN2A	80.4107	79.5374	2	0.402158
1662	S100A4	80.3989	90.1935	4	-0.929362
1663	NFYB	80.3871	88.4588	4	-0.761438		Cluster2
1664	FLT4	80.3753	61.9129	2	1.86644
1665	GAS2	80.3635	88.9544	7	-1.17911		Cluster24
1666	MYL1	80.3517	81.1836	3	0
1667	TNK2	80.3399	74.9823	3	0.486059
1668	DAB2	80.3281	73.5603	2	0.859957
1669	RPL37	80.3163	90.6774	8	-1.64786	RNA	Cluster14
1670	SAP30BP	80.3045	74.0854	2	0.806837
1671	NUP50	80.2927	85.4791	11	-1.04158		Cluster18
1672	LRP2	80.2809	68.1732	1	2.30666	CLIP	Cluster42
1673	MAPT	80.2691	82.0628	4	-0.194724	RNA	Cluster17
1674	BCCIP	80.2573	75.7494	2	0.673614		Cluster35
1675	LIG1	80.2455	76.0444	2	0.64174
1676	BCL2	80.2337	88.6948	4	-0.821227
1677	ADCY8	80.2219	74.7168	2	0.740254		Cluster45
1678	ZFPM1	80.2042	77.3661	3	0.27453
1679	EZH2	80.2042	83.8978	4	-0.357778
1680	MFAP2	80.1865	80.0802	3	0.0341807		Cluster45
1681	XPO5	80.1747	60.2431	2	2.02401	CLIP	Cluster10
1682	RAPGEF1	80.1629	65.8957	1	2.83432	CLIP	Cluster25
1683	UIMC1	80.151	73.4482	2	0.840936
1684	CLTB	80.1392	76.7052	4	0.129874
1685	PSMB10	80.1215	85.5558	4	-0.500564
1686	DNM1L	80.1215	72.3448	2	0.928808		Cluster7
1687	MCM3AP	80.0979	58.3078	2	2.34001	CLIP	Cluster18
1688	HIP1R	80.0979	82.759	1	0.702227
1689	NUPL2	80.0802	84.7298	11	-1.02283		Cluster18
1690	SAMM50	80.0684	71.7961	1	1.74815
1691	ATP1B2	80.0566	95.0142	1	-0.229476
1692	PPP2R5C	80.0448	82.3696	2	0.140377
1693	AP1S3	80.033	73.4364	3	0.562083
1694	TCIRG1	80.0212	79.4312	1	0.984135
1695	HCK	80.0035	96.0349	10	NA		Cluster25
1696	DYNC2LI1	80.0035	81.396	3	-0.0149628
1697	MDN1	79.9858	66.9224	1	2.41452	CLIP	Cluster37
1698	CDK19	79.974	86.7241	10	-1.18061
1699	CTNND2	79.9622	61.6061	2	1.82219	CLIP	Cluster20
1700	PPP1R15A	79.9504	67.7484	1	2.26426		Cluster45
1701	CISH	79.9386	62.7095	2	1.69979
1702	COL4A1	79.9268	76.5046	1	1.25758
1703	UNC45A	79.915	66.5388	1	2.43242	CLIP	Cluster31
1704	RGMA	79.9032	70.026	2	1.07992		Cluster45
1705	PIAS3	79.8914	64.0194	4	1.00815
1706	TRAPPC10	79.8796	75.9618	1	1.29336
1707	XRCC4	79.8678	81.8976	2	0.150122
1708	RHOA	79.856	89.4973	5	-1.14716		Cluster20
1709	VMA21	79.8442	87.1253	11	-1.42923		Cluster19
1710	GSPT1	79.8324	78.7704	1	1.01652	CLIP	Cluster9
1711	UCKL1	79.8206	85.0425	2	-0.0736273
1712	PEX6	79.8088	55.0153	2	3.21043	CLIP
1713	PSMF1	79.797	85.2254	4	-0.518198
1714	PIAS2	79.7852	84.3934	3	-0.284675
1715	RRP1B	79.7734	69.2589	1	1.98743	CLIP	Cluster37
1716	PATL1	79.7616	83.0068	1	0.632833
1717	CIB1	79.7498	87.3613	2	-0.240888
1718	MED22	79.738	84.9186	11	-1.10759
1719	TRAPPC1	79.7262	78.8412	1	0.993625
1720	JUNB	79.7144	68.6335	1	2.04368
1721	CCT8L2	79.7026	98.1355	5	NA		Cluster36
1722	SKA2	79.6908	90.2525	9	-1.95404
1723	AGL	79.6731	70.1676	2	1.0308		Cluster45
1724	HAX1	79.6731	73.5603	1	1.49351
1725	KIF1B	79.6554	66.4621	1	2.35285	CLIP	Cluster27
1726	ATP6V1C1	79.6436	86.5589	3	-0.457741
1727	TPM4	79.6318	84.4229	4	-0.479468
1728	DNMT3A	79.62	77.071	1	1.15622
1729	MAPK8IP2	79.6082	72.988	1	1.54186		Cluster45
1730	MED9	79.5964	83.0304	10	-0.858505
1731	RPS6KA4	79.5846	66.8574	2	1.25522
1732	CTTNBP2NL	79.5728	80.151	2	0.243486
1733	UBE2E1	79.561	87.3849	6	-1.09852		Cluster27
1734	PDS5B	79.5492	68.0611	1	2.0712	CLIP	Cluster26
1735	EIF3J	79.5374	91.7512	4	-1.31488
1736	TRPC4AP	79.5256	68.0788	2	1.15414		Cluster45
1737	COPS3	79.5138	77.0179	1	1.13649
1738	RANBP1	79.502	89.2613	2	-0.413739		Cluster18
1739	ATP5I	79.4902	83.4612	2	-0.00310434	RNA	Cluster7
1740	ATP6AP1	79.4784	83.6087	2	-0.0127939
1741	MAP2K1	79.4666	82.2752	3	-0.146827
1742	SNIP1	79.4548	82.4758	4	-0.323299
1743	HIST1H4B	79.443	88.388	2	-0.360135		Cluster2
1744	EMD	79.4312	72.1147	2	0.845099
1745	SUPT4H1	79.4194	86.3406	5	-0.872412
1746	UNC13B	79.4076	64.279	1	2.86413	CLIP	Cluster6
1747	MED17	79.3958	86.4055	11	-1.4191		Cluster2
1748	CACNB2	79.384	82.169	2	0.0487402
1749	MVP	79.3722	62.0073	2	1.65068
1750	SUCO	79.3604	84.954	2	-0.126188
1751	MED20	79.3486	86.6651	12	-1.54212		Cluster2
1752	CHRM3	79.3368	79.3368	2	0.279336
1753	HIST1H2BC	79.325	74.3628	3	0.388618		Cluster45
1754	LIMK2	79.3132	64.1787	2	1.43646		Cluster1
1755	MYL6	79.3014	83.0186	7	-0.707506	RNA	Cluster24
1756	POLR3D	79.2896	78.0859	4	-0.0202596
1757	ANXA6	79.2778	69.4595	1	1.82296
1758	FNIP1	79.266	74.5339	1	1.31793		Cluster45
1759	CBX5	79.2542	92.0758	5	-1.93574		Cluster2
1760	PSEN2	79.2424	75.2655	2	0.594262
1761	EPS8	79.2306	75.9795	2	0.535658
1762	TTL	79.2188	91.7925	1	-0.0423296
1763	LNPEP	79.207	83.3019	2	-0.0122857
1764	PRIM1	79.1952	74.6932	2	0.611876
1765	ADRBK1	79.1834	96.3182	7	NA		Cluster1
1766	PSME3	79.1716	86.4763	4	-0.757609
1767	RNF19A	79.1598	76.3748	1	1.13042
1768	DNAJC5	79.148	81.2603	3	-0.133417		Cluster45
1769	PDPK1	79.1362	77.8499	3	0.0622434
1770	EIF4E3	79.1244	92.2292	3	-1.20552
1771	PFKP	79.1126	62.6623	2	1.52589
1772	SH3GL2	79.1008	90.0342	5	-1.45838		Cluster19
1773	IRF7	79.089	69.5008	2	0.974363
1774	S100B	79.0772	91.8692	3	-1.13332
1775	SGOL1	79.0654	93.6866	13	NA		Cluster18
1776	TPM1	79.0477	91.0078	5	-1.69248
1777	FOXO4	79.0477	83.8978	5	-0.698699
1778	GRP	79.03	85.1015	4	-0.654369
1779	NME4	79.0182	93.604	2	-0.981399		Cluster28
1780	PALB2	79.0064	67.3472	1	1.98477		Cluster45
1781	RTN4	78.9946	74.2329	1	1.28909	CLIP	Cluster20
1782	SGOL2	78.9828	93.4978	13	NA		Cluster18
1783	EED	78.971	71.9318	2	0.785026
1784	TRIM27	78.9592	67.6127	2	1.09207
1785	IFNAR1	78.9474	74.4277	4	0.140141
1786	SYCP2	78.9356	92.3354	5	-2.39644
1787	ARF6	78.9238	85.8508	4	-0.741623
1788	MIF4GD	78.912	80.4933	2	0.105052
1789	SPC24	78.9002	87.8098	10	-1.9055
1790	DECR1	78.8884	89.5209	3	-0.916349
1791	CDK14	78.8766	75.7139	2	0.50698		Cluster35
1792	PRMT2	78.8648	78.0741	2	0.304667
1793	EFNB3	78.853	84.0335	4	-0.585193		Cluster1
1794	FZD2	78.8412	58.7208	2	1.9052	CLIP	Cluster5
1795	NUFIP1	78.8294	77.5313	2	0.345517
1796	MED10	78.8176	82.4168	9	-0.834251
1797	DYNC1LI1	78.8058	71.9318	2	0.767232
1798	IMMT	78.794	65.7423	1	2.18511	CLIP	Cluster15
1799	HSPB1	78.7822	81.0066	3	-0.155203
1800	KRI1	78.7704	70.7458	1	1.58889
1801	MED29	78.7586	86.1695	11	-1.60902
1802	BAG2	78.7468	84.5291	3	-0.448752
1803	NAF1	78.735	80.1747	1	0.720853
1804	BIRC2	78.7232	85.544	1	0.300348
1805	ULK1	78.7114	68.3679	2	1.00444
1806	FBXL7	78.6996	77.6847	4	-0.0819639
1807	ATP6V1B1	78.6878	79.4312	1	0.776069
1808	LSM6	78.676	87.2787	4	-0.951046
1809	KCNA5	78.6641	71.2591	2	0.794329
1810	ZFYVE16	78.6523	67.7189	2	1.04443		Cluster45
1811	RIC8A	78.6405	70.3328	1	1.5965
1812	CATSPERD	78.6287	80.6231	2	0.0556058
1813	CASC5	78.6169	93.1968	12	NA		Cluster18
1814	MED21	78.6051	87.5738	11	-2.25878		Cluster2
1815	CAPN1	78.5933	66.3559	1	2.01162
1816	MAPKAP1	78.5815	67.1348	2	1.07184
1817	THOC6	78.5697	75.2183	1	1.15397
1818	GNAT2	78.5579	81.7442	2	0
1819	ING3	78.5461	84.4347	5	-0.853565
1820	DLAT	78.5343	78.2393	1	0.867333
1821	PEX5	78.5225	65.8485	1	2.08805	CLIP
1822	NBN	78.5107	78.5815	2	0.216219
1823	UNC5C	78.4989	82.0746	3	-0.256539
1824	NFATC1	78.4871	73.5426	1	1.28065
1825	MSN	78.4753	75.6667	1	1.09586
1826	FKBPL	78.4635	64.9398	1	2.20024
1827	NPM1	78.4517	90.0991	3	-1.06538	RNA	Cluster27
1828	GNB2L1	78.4399	94.607	8	NA		Cluster40
1829	HLA-DRB5	78.4281	93.2381	11	NA		Cluster19
1830	NGDN	78.4163	68.5273	1	1.72243
1831	DXO	78.4045	76.0562	2	0.408619
1832	FLCN	78.3927	84.3639	1	0.33555		Cluster9
1833	MAP3K1	78.3809	65.1404	1	2.14543	CLIP	Cluster39
1834	RRM1	78.3691	62.8629	1	2.62035	CLIP	Cluster32
1835	NEK6	78.3573	77.2835	2	0.309977
1836	RBL2	78.3455	70.6042	1	1.51478	CLIP	Cluster35
1837	LAMA4	78.3337	68.0316	2	0.970201
1838	LSM5	78.3219	90.3941	5	-1.91803
1839	HIST2H2AC	78.3101	78.5933	3	-0.0395075		Cluster45
1840	CLTA	78.2983	76.7052	4	-0.0603356
1841	ANAPC13	78.2865	78.5225	4	-0.193946
1842	MED31	78.2747	82.523	9	-0.944795
1843	SPG7	78.2629	76.6108	1	0.967801
1844	SNRPD1	78.2511	89.7038	5	-1.76096
1845	AIMP2	78.2393	78.8294	4	-0.216285		Cluster21
1846	MCAT	78.2275	84.2223	2	-0.212826
1847	DCTN6	78.2157	86.8893	4	-0.996949
1848	MEF2D	78.2039	79.325	4	-0.256047
1849	ATF6	78.1921	78.5579	2	0.182621
1850	EFNA5	78.1803	87.0545	4	-1.03772
1851	EXOSC5	78.1685	73.1709	2	0.605309
1852	IGF1	78.1567	93.8636	9	NA		Cluster1
1853	TMED7	78.1449	87.1253	11	-2.37535		Cluster19
1854	UTP15	78.1331	83.5615	2	-0.181847
1855	DLST	78.1213	83.5497	1	0.373908
1856	COPS6	78.1095	70.1912	1	1.51556
1857	GNB2	78.0977	72.038	1	1.36685
1858	ETS2	78.0859	61.6474	2	1.43515
1859	TCF3	78.0741	71.206	4	0.28346
1860	GTF2H4	78.0623	84.3757	3	-0.537506
1861	POLR3F	78.0446	74.469	3	0.200631
1862	SDC1	78.0446	83.3727	3	-0.441273		Cluster45
1863	PAX6	78.0269	81.9684	3	-0.315085
1864	TARBP2	78.0151	83.0776	1	0.402562
1865	ATP1B1	78.0033	94.7014	1	-0.482514
1866	ZNF593	77.9915	71.6781	1	1.37554
1867	ATXN1	77.9797	87.3967	4	-1.11767
1868	SPAG5	77.9679	64.4324	1	2.13943	CLIP	Cluster27
1869	NDN	77.9561	74.8643	2	0.459197
1870	COIL	77.9443	61.6651	1	2.70633
1871	MOB3C	77.9325	74.1444	3	0.208894
1872	CDK6	77.9207	85.2726	3	-0.629777		Cluster35
1873	CATSPERB	77.9089	80.6231	2	0
1874	CFTR	77.8971	94.5303	7	NA		Cluster1
1875	VDR	77.8853	92.2823	12	NA		Cluster44
1876	SYNE3	77.8735	80.8591	3	-0.24273		Cluster45
1877	SOST	77.8617	81.7265	2	-0.0488318
1878	CENPM	77.8499	87.6564	10	-2.9348
1879	RUNX1T1	77.8381	73.1414	3	0.294873
1880	TOP1	77.8263	71.1293	1	1.39389	CLIP	Cluster33
1881	ZMAT2	77.8145	80.7411	4	-0.395706
1882	USP39	77.8027	70.557	1	1.43268
1883	GNAS	77.7909	73.401	1	1.19259	CLIP	Cluster35
1884	HUS1	77.7791	88.3408	4	-1.30069
1885	ABLIM3	77.7673	76.5341	2	0.290846
1886	MOB4	77.7496	90.0106	3	-1.18024
1887	GRIK3	77.7496	79.2424	1	0.677317		Cluster45
1888	GLI2	77.7319	64.8218	1	2.02547		Cluster45
1889	IRF2	77.7201	62.4498	1	2.45624
1890	SNAP91	77.7083	71.4067	1	1.35846		Cluster45
1891	BAHD1	77.6965	69.1645	1	1.53529
1892	SPTBN5	77.6847	94.2235	7	NA		Cluster1
1893	KIF25	77.6729	96.8374	4	NA		Cluster27
1894	PRKCQ	77.6611	62.6505	2	1.30302
1895	PPP3CB	77.6493	81.8504	2	-0.0794304
1896	EPHA7	77.6375	72.3271	1	1.27318	CLIP	Cluster25
1897	SOCS2	77.6257	66.6686	2	0.971388
1898	ATP5H	77.6139	83.6441	2	-0.24004	RNA	Cluster7
1899	TNFAIP1	77.6021	76.1388	4	-0.0887532
1900	MCMBP	77.5903	58.1544	2	1.68538	CLIP	Cluster35
1901	AHSA1	77.5785	71.4952	1	1.32761
1902	WIZ	77.5667	65.2702	1	1.9377	CLIP	Cluster34
1903	SUZ12	77.5549	81.8622	3	-0.341608
1904	ITGAE	77.5431	69.908	3	0.481055
1905	RFWD2	77.5254	66.7394	1	1.72044	CLIP	Cluster22
1906	KHSRP	77.5254	74.9705	1	1.01534
1907	KRT8	77.5077	64.3203	1	2.04145	RNA	Cluster39
1908	DPP3	77.4959	61.6651	1	2.48904
1909	TIPIN	77.4841	80.4225	3	-0.261183
1910	XPC	77.4664	66.946	1	1.68501
1911	KIF26A	77.4664	59.8301	1	3.18996	CLIP	Cluster27
1912	BRD2	77.4487	75.6313	1	0.955834
1913	HMGXB4	77.4369	72.0203	3	0.321779
1914	CDKN2A	77.4251	95.2561	5	NA
1915	PNPT1	77.4133	67.9431	2	0.85764
1916	MTSS1	77.4015	69.2058	3	0.499094
1917	SAFB	77.3897	65.3882	1	1.86698	CLIP	Cluster34
1918	EPOR	77.3779	70.6514	2	0.665215
1919	SH2B1	77.3661	85.1192	3	-0.713505
1920	CHD1	77.3543	62.5089	2	1.27374	CLIP	Cluster16
1921	NME3	77.3425	83.7326	1	0.258659
1922	DTL	77.3307	69.7427	2	0.712891
1923	UQCRC2	77.3189	82.4581	1	0.39211
1924	UCHL1	77.3071	78.1095	2	0.0947818
1925	YARS	77.2953	57.9655	2	1.65305	CLIP	Cluster21
1926	AIP	77.2835	65.5063	1	1.82476
1927	FDFT1	77.2717	70.1322	2	0.679795		Cluster45
1928	LMNA	77.2599	74.6755	2	0.371609
1929	CNOT4	77.2481	84.8773	2	-0.377793		Cluster23
1930	E2F4	77.2363	80.1274	3	-0.261811
1931	VLDLR	77.2245	68.9875	3	0.490757
1932	HAP1	77.2126	75.4307	3	0.0118472
1933	GGA1	77.2009	69.0819	2	0.734208
1934	RNF40	77.189	68.1378	1	1.54357	CLIP	Cluster32
1935	CNOT10	77.1772	78.6878	2	0.0122306		Cluster23
1936	SAC3D1	77.1595	64.2672	1	1.95079
1937	EXOSC7	77.1595	73.6783	2	0.444864
1938	SOX10	77.1418	68.2499	1	1.52272		Cluster45
1939	TOMM34	77.13	71.4952	1	1.25816
1940	RAB1A	77.1182	81.992	5	-0.783772
1941	FBXO6	77.1064	77.6847	4	-0.253267
1942	CSE1L	77.0887	66.0019	1	1.71625	CLIP	Cluster20
1943	RNMT	77.0887	80.2455	1	0.534887
1944	ATP5G2	77.071	83.9745	2	-0.329511
1945	PNN	77.0592	86.1459	2	-0.490037
1946	RYR2	77.0474	81.9566	2	-0.15943
1947	ESPL1	77.0356	63.1815	1	2.07943		Cluster45
1948	IGF2BP1	77.0238	73.8848	3	0.114072		Cluster45
1949	GTF2E1	77.012	71.8669	1	1.20534
1950	STIM1	77.0002	65.6479	1	1.73924
1951	SRP54	76.9884	81.7678	1	0.403817
1952	MAPKAPK2	76.9766	71.4185	2	0.575653
1953	CTNNBIP1	76.9648	79.7616	4	-0.431589
1954	USP2	76.953	67.3236	1	1.55317
1955	TGFBI	76.9412	88.1579	4	-1.52273
1956	NCAPG	76.9294	69.8076	1	1.35087		Cluster45
1957	FGR	76.9176	92.5714	8	NA		Cluster25
1958	PHB2	76.9058	65.5299	3	0.657359
1959	SDC3	76.894	76.127	2	0.216192		Cluster1
1960	FLNC	76.8822	58.6736	1	3.46874	CLIP	Cluster25
1961	ENC1	76.8704	60.5381	2	1.31949	CLIP	Cluster39
1962	PPM1D	76.8586	66.7217	2	0.84849
1963	A2M	76.8468	62.6859	1	2.07913
1964	WAPAL	76.835	92.4357	8	NA
1965	SKIL	76.8232	73.7668	2	0.387519
1966	CACNG2	76.8114	81.5612	2	-0.167147
1967	TAF12	76.7996	86.4999	6	-1.76998
1968	MAPK7	76.7878	71.147	1	1.22046
1969	CACNG7	76.776	81.2131	2	-0.151906
1970	HIF3A	76.7642	77.6139	4	-0.309396
1971	MBD1	76.7524	77.3307	2	0.0857852
1972	PSMD10	76.7406	87.0427	4	-1.40996
1973	EXOSC3	76.7288	73.1709	2	0.414024
1974	DHX58	76.717	95.3977	4	NA		Cluster37
1975	KLHL3	76.7052	75.6136	4	-0.17512
1976	KIFC1	76.6934	67.1702	1	1.48321		Cluster45
1977	CAMKK2	76.6816	71.9023	2	0.490021
1978	AMFR	76.6698	68.7633	1	1.36318
1979	PWP2	76.658	93.8046	5	NA
1980	PHKA1	76.6462	65.4236	1	1.66403
1981	SPTLC1	76.6344	69.5834	2	0.610473
1982	TRIO	76.6226	61.3229	1	2.1375	CLIP	Cluster38
1983	IQGAP2	76.6108	57.6823	1	3.25606	CLIP	Cluster38
1984	CASP8	76.599	93.7043	5	NA
1985	ITSN1	76.5872	72.1442	1	1.09421	CLIP	Cluster38
1986	HIST1H2BA	76.5754	74.5103	3	0
1987	SRCAP	76.5636	53.08	2	1.93339
1988	PHKA2	76.5518	62.7803	1	1.94686	CLIP	Cluster6
1989	ISL1	76.54	74.0618	2	0.287163
1990	PLEKHM2	76.5282	58.7916	1	2.68264	CLIP	Cluster8
1991	PPP6R1	76.5164	61.3052	1	2.10901	CLIP	Cluster4
1992	ZC3HC1	76.5046	64.3616	1	1.73121
[truncated: 6,482 more rows]

## Sheet: S4E. Ranked gene list (vneuron)
Supplmental Table S4E. Full list of ranked genes in vNeuron
	Percentile			Percentil rank score of gene, which is simultaneously based on diffusion score + Number of CLIP hits + CLIP-seq value fold change
	Diffusion score			Percentile rank score of genes based on integrative network node diffsuion of CLIP targets and RNA-seq DEGs
	Number of neighbors CLIP hits			Number of direct connection to CLIP target in the network
	CLIP-seq value fold change			Normalized fold change values derieved from CLIP-seq measurement
	Hits			Identification of hits in experiments; CLIP=CLIP-seq hit, RNA=DEG from RNA-seq, CLIP&RNA =
	Cluster ID			Cluster assignment ID from network-based clustering
Rank	Gene ID	Percentile	Diffusion score	Number of neighbors CLIP hits	CLIP-seq value fold change	Hits	Cluster ID
1	CTNNB1	100	99.9646	18	2.31064	CLIP	Cluster38
2	PRKDC	99.9882	99.2329	10	3.76037	CLIP	Cluster35
3	EIF4G1	99.9764	99.3274	9	3.71936	CLIP	Cluster14
4	CREBBP	99.9646	99.705	14	2.42393	CLIP	Cluster31
5	CTNNA1	99.9528	99.646	9	2.49433	CLIP	Cluster38
6	EP300	99.941	99.41	14	2.37914	CLIP	Cluster31
7	ERBB2	99.9292	98.8907	8	3.13349	CLIP	Cluster25
8	MTOR	99.9174	98.7491	12	2.65297	CLIP	Cluster29
9	FYN	99.9056	99.9056	21	1.90456		Cluster25
10	ANK1	99.8938	99.5398	5	2.92889		Cluster12
11	ABL1	99.882	99.1739	11	2.27714	CLIP	Cluster25
12	SPTAN1	99.8702	98.9969	5	3.31961	CLIP	Cluster12
13	SIN3A	99.8584	99.2447	7	2.40911	CLIP	Cluster34
14	AXIN1	99.8466	99.0146	8	2.354		Cluster38
15	KIF3B	99.8348	99.4808	6	2.32185	CLIP	Cluster2
16	AP2A1	99.8171	97.2504	10	2.93336	CLIP	Cluster19
17	CLASP1	99.8171	99.469	10	1.92597	CLIP	Cluster27
18	KIFAP3	99.7994	99.1267	5	2.5415	CLIP	Cluster2
19	KIF11	99.7876	99.823	6	1.95434		Cluster2
20	PTPN11	99.7758	99.1385	10	2.01004	CLIP	Cluster25
21	SPTBN1	99.764	98.5839	4	3.63514	CLIP	Cluster12
22	ANK2	99.7522	98.6783	4	3.40047	CLIP	Cluster12
23	NCOR1	99.7404	98.8435	7	2.18077		Cluster34
24	AR	99.7286	99.2093	10	1.90813		Cluster34
25	IRS1	99.7168	98.8317	10	1.93741	CLIP	Cluster25
26	NUP133	99.705	97.6516	10	2.264	CLIP	Cluster18
27	PKN1	99.6932	97.6752	6	2.75672		Cluster20
28	CDC20	99.6814	97.4156	7	2.70547		Cluster18
29	BUB1B	99.6696	97.4982	7	2.63756		Cluster18
30	CDK2	99.6578	98.9143	8	1.99619		Cluster35
31	SPTB	99.646	98.7255	4	2.63093		Cluster12
32	PIK3CA	99.6342	98.5485	6	2.16149	CLIP	Cluster25
33	STAT1	99.6224	98.2417	7	2.17816		Cluster25
34	NOTCH1	99.6106	97.4038	6	2.67812	CLIP	Cluster8
35	SEC24D	99.5988	95.9169	10	2.91041	CLIP	Cluster19
36	JAK1	99.587	97.51	6	2.55277	CLIP	Cluster25
37	PLK1	99.5752	99.4336	15	1.58159		Cluster27
38	CHAF1A	99.5634	98.6134	3	3.20512	CLIP	Cluster16
39	STAT3	99.5516	99.292	11	1.62931	CLIP	Cluster25
40	IQGAP1	99.5398	99.2211	6	1.88494	CLIP	Cluster24
41	CKAP5	99.528	96.8846	5	3.10029	CLIP	Cluster27
42	SREBF2	99.5162	99.5752	5	1.844	CLIP	Cluster23
43	CLASP2	99.5044	99.5634	11	1.46863		Cluster18
44	CDK5	99.4926	99.6814	10	1.42534		Cluster1
45	KIF23	99.4808	98.1591	3	3.25061	CLIP	Cluster2
46	KIFC3	99.469	99.2683	4	2.03581		Cluster2
47	HDAC5	99.4572	98.1945	8	1.8886		Cluster34
48	SPTBN2	99.4454	97.5867	3	4.03349	CLIP	Cluster12
49	HSP90AA1	99.4336	99.0146	12	1.51521		Cluster29
50	NGF	99.4218	98.3833	10	1.6956		Cluster25
51	AKT1	99.41	99.9882	27	1.16445		Cluster25
52	CD2AP	99.3982	98.9674	5	1.83659		Cluster24
53	RB1	99.3864	99.1503	6	1.70331	CLIP	Cluster16
54	DNM2	99.3746	97.392	4	2.6189	CLIP	Cluster19
55	PARP1	99.3628	96.8256	6	2.25993	CLIP	Cluster35
56	DHX9	99.351	93.9226	10	2.74604	CLIP	Cluster26
57	RELA	99.3392	98.7019	5	1.82051		Cluster34
58	PIK3CB	99.3274	96.3654	5	2.50996		Cluster25
59	SEC24C	99.3156	95.7989	11	2.09612		Cluster19
60	POLR2B	99.3038	94.6011	9	2.52228	CLIP	Cluster26
61	KIF5B	99.292	99.8466	6	1.38316		Cluster2
62	AP2A2	99.2802	97.1442	9	1.88946	CLIP	Cluster19
63	IRS2	99.2683	95.4272	7	2.37782	CLIP	Cluster25
64	PPFIA2	99.2565	99.9292	3	1.70422		Cluster12
65	NUP107	99.2447	98.0352	11	1.58837		Cluster18
66	AP2M1	99.2329	97.3153	13	1.71317		Cluster19
67	HLA-C	99.2211	97.3684	5	2.08697		Cluster19
68	CHD4	99.2093	95.3741	4	3.61809	CLIP	Cluster34
69	KIF2C	99.1975	99.4218	9	1.35444		Cluster18
70	JUP	99.1857	99.6342	6	1.39017		Cluster38
71	EIF3F	99.1739	98.46	8	1.54089		Cluster14
72	AURKB	99.1621	99.3864	9	1.32927		Cluster18
73	BUB1	99.1503	95.1971	4	3.43786	CLIP	Cluster18
74	ERCC6L	99.1385	94.6542	5	2.95888
75	RUVBL1	99.1267	97.4628	7	1.80734		Cluster32
76	SF3B2	99.1149	92.6009	9	3.01014		Cluster26
77	INSR	99.1031	96.566	6	2.07327	CLIP	Cluster25
78	IGF1R	99.0913	96.3299	6	2.07809	CLIP	Cluster25
79	KPNB1	99.0795	95.7517	9	2.00446	CLIP	Cluster18
80	TOP2B	99.0677	94.5008	5	2.85067	CLIP	Cluster16
81	KIT	99.0559	94.7604	4	3.58599		Cluster25
82	BCAR1	99.0441	98.46	3	2.0813		Cluster25
83	SNRNP200	99.0323	91.7866	8	3.81019	CLIP	Cluster26
84	NCOA1	99.0205	96.9967	7	1.82884	CLIP	Cluster31
85	SOS1	99.0087	99.3982	12	1.21028		Cluster25
86	MED12	98.9969	93.6984	7	2.64599	CLIP	Cluster31
87	BRCA1	98.9851	98.4187	10	1.39977		Cluster13
88	PRPF8	98.9733	91.5152	8	4.26214	CLIP	Cluster26
89	MARS	98.9615	98.1119	3	2.15425		Cluster21
90	DHX38	98.9497	91.822	9	3.04312	CLIP	Cluster26
91	CENPF	98.9379	94.1114	4	3.62882	CLIP	Cluster18
92	PTK2B	98.9261	97.7578	7	1.59864		Cluster25
93	RHOQ	98.9143	99.1857	4	1.58926		Cluster24
94	APC2	98.9025	94.017	4	3.36997	CLIP&RNA	Cluster24
95	ERBB4	98.8907	95.2797	3	3.83002	CLIP	Cluster25
96	PPP2R1A	98.8789	98.6134	7	1.40219		Cluster27
97	INCENP	98.8671	96.0762	5	2.09273		Cluster18
98	FN1	98.8553	98.2181	4	1.78062		Cluster25
99	FES	98.8435	96.3772	6	1.90161		Cluster1
100	NUP160	98.8317	97.9349	11	1.38145		Cluster18
101	HTT	98.8199	96.2827	3	2.68126	CLIP	Cluster29
102	PRPF6	98.8081	91.8928	10	2.51394		Cluster26
103	SRC	98.7963	99.9528	27	0.902236		Cluster25
104	HIF1A	98.7845	96.4244	7	1.7973	CLIP	Cluster34
105	CHD3	98.7727	93.5804	4	3.59409	CLIP	Cluster34
106	CTNND1	98.7609	99.0323	4	1.52688		Cluster38
107	DNMT1	98.7491	97.038	3	2.27241		Cluster34
108	ZNF217	98.7373	93.2853	4	3.86475	CLIP	Cluster34
109	MYO1C	98.7255	97.3153	3	2.18519		Cluster24
110	KIF5C	98.7137	97.5218	3	2.09838	CLIP	Cluster2
111	XRCC6	98.7019	95.1381	5	2.17149		Cluster35
112	SMARCC1	98.6901	96.1234	7	1.81408		Cluster16
113	PPFIA3	98.6783	99.7758	2	1.83735		Cluster36
114	PPP2R2C	98.6665	93.84	5	2.46123		Cluster36
115	KIF4A	98.6547	93.3266	4	3.44723		Cluster2
116	ATM	98.6429	98.4777	9	1.25395		Cluster13
117	PLCG1	98.6311	97.6988	4	1.78749		Cluster25
118	SF3B3	98.6193	91.0196	8	2.8913	CLIP	Cluster26
119	NFKBIA	98.6075	93.1201	5	2.65453
120	APC	98.5957	96.7725	3	2.20426	CLIP	Cluster38
121	BAZ1B	98.5839	94.0465	4	2.6178		Cluster16
122	RARS	98.5721	97.4274	3	2.05831		Cluster21
123	QARS	98.5603	98.1709	2	2.32393	CLIP	Cluster21
124	SMARCC2	98.5485	95.5393	6	1.87769		Cluster16
125	EPHA2	98.5367	95.9995	5	1.91556		Cluster25
126	CAPN6	98.5249	93.3266	4	2.93293
127	SUV39H1	98.5131	96.3063	3	2.27401		Cluster34
128	TSC2	98.5013	94.8844	4	2.27476	CLIP	Cluster29
129	RUVBL2	98.4895	97.2858	8	1.43003		Cluster32
130	EPRS	98.4777	96.3477	2	3.45285	CLIP	Cluster21
131	FOS	98.4659	94.7486	5	2.07895
132	PPP4C	98.4541	98.4305	4	1.50331		Cluster36
133	KIF5A	98.4423	99.3038	4	1.34465		Cluster2
134	PPP1CA	98.4305	96.1057	5	1.81831		Cluster36
135	CBL	98.4187	99.0736	8	1.1087		Cluster25
136	GTF2F1	98.4069	94.3592	9	1.79528		Cluster26
137	SPTBN4	98.3951	98.7786	4	1.41241		Cluster12
138	HDAC6	98.3833	95.0083	4	2.15973	CLIP	Cluster34
139	DYNC1H1	98.3715	91.7158	4	4.46309	CLIP	Cluster27
140	ZW10	98.3597	97.9585	8	1.27138		Cluster18
141	CDH2	98.3479	99.8584	11	0.801769		Cluster38
142	HCFC1	98.3361	92.4711	4	2.92152	CLIP	Cluster32
143	NCOA2	98.3243	96.4126	8	1.49862		Cluster31
144	SEC24A	98.3125	95.7045	10	1.49588	CLIP	Cluster19
145	SMARCA2	98.3007	97.3802	5	1.50699		Cluster16
146	TUBG1	98.2889	94.4536	4	2.17658
147	UPF1	98.2771	92.5301	4	2.73036	CLIP	Cluster14
148	EZR	98.2653	99.3687	4	1.25961		Cluster24
149	CLTC	98.2535	90.5358	5	3.06886	CLIP	Cluster19
150	KDR	98.2417	97.9113	7	1.24965		Cluster1
151	PARD6A	98.2299	94.4064	3	2.52078
152	PRKCZ	98.2181	95.9051	3	2.13501		Cluster5
153	HSPA4	98.2063	98.3007	4	1.42191		Cluster29
154	MYO9B	98.1945	97.1619	3	1.86513		Cluster24
155	CCT4	98.1827	94.7368	3	2.40035	CLIP	Cluster36
156	NDC80	98.1709	95.2089	5	1.79773		Cluster18
157	FLNA	98.1591	95.1499	2	3.48763	CLIP	Cluster25
158	IRAK1	98.1473	94.9965	4	2.00223
159	PPFIA1	98.1355	99.6637	3	1.2441		Cluster36
160	RAC3	98.1237	99.9174	13	0.680769		Cluster24
161	HDAC4	98.1119	97.8287	7	1.20037		Cluster34
162	TP53	98.1001	99.941	25	0.641936		Cluster34
163	RBBP7	98.0883	98.6547	8	1.00499		Cluster34
164	CENPL	98.0765	94.2589	5	1.83537
165	RXRA	98.0647	98.3538	11	0.981059		Cluster31
166	INPPL1	98.0529	92.7307	3	2.9	CLIP	Cluster25
167	CUL3	98.0411	98.0647	7	1.13461		Cluster2
168	MTM1	98.0293	100	1	2.0064		Cluster6
169	KCNQ2	98.0175	96.1883	5	1.53779		Cluster12
170	KNTC1	98.0057	97.8582	8	1.11263		Cluster18
171	CENPE	97.9939	94.4418	5	1.79365		Cluster18
172	PIK3CD	97.9821	93.8636	4	2.04021
173	KIF15	97.9703	99.2683	4	1.13939		Cluster2
174	SCAP	97.9585	94.0465	4	1.98515	CLIP	Cluster23
175	SNW1	97.9467	93.2381	8	1.73111		Cluster26
176	SH3KBP1	97.9349	96.389	3	1.8381		Cluster25
177	PPP2R2A	97.9231	98.5367	9	0.93801		Cluster36
178	PAK1	97.9113	98.1001	5	1.20427		Cluster20
179	CPSF3	97.8995	89.7569	9	2.1556		Cluster26
180	EIF4A3	97.8877	95.5157	6	1.48932		Cluster14
181	CCT7	97.8759	92.3885	3	2.74357	CLIP	Cluster36
182	COPA	97.8641	88.506	6	2.90234	CLIP	Cluster19
183	MED26	97.8523	88.1933	7	2.73962
184	CUL1	97.8405	94.9611	5	1.62822		Cluster8
185	PTK2	97.8287	98.9379	8	0.890801		Cluster25
186	SMC3	97.8169	90.7718	5	2.29535		Cluster13
187	SMARCD1	97.8051	95.4449	6	1.45696		Cluster16
188	AMOT	97.7933	95.3623	2	2.46499	CLIP	Cluster24
189	SF3B1	97.7814	92.0109	9	1.74038	CLIP	Cluster26
190	PALLD	97.7696	98.1827	4	1.24779		Cluster24
191	ACTN1	97.7519	93.722	3	2.20249	CLIP	Cluster24
192	HNRNPUL1	97.7519	90.5712	8	1.9978	CLIP	Cluster26
193	SEC31A	97.7342	91.5742	7	1.90013	CLIP	Cluster19
194	DAXX	97.7224	94.0878	2	2.85094		Cluster34
195	NCOA3	97.7106	94.194	7	1.50065		Cluster31
196	AXIN2	97.6988	94.1586	3	2.07536
197	HDAC3	97.687	99.1621	15	0.730928		Cluster34
198	SF3A1	97.6752	91.232	9	1.79325		Cluster26
199	CLIP1	97.6634	97.1206	8	1.09869		Cluster18
200	SMAD3	97.6457	97.9821	6	1.05062		Cluster34
201	SEC24B	97.6457	93.2027	6	1.68375	CLIP	Cluster19
202	CCT5	97.628	93.7456	4	1.86409		Cluster36
203	TRIM28	97.6162	92.7071	3	2.30544	RNA	Cluster34
204	INPP5D	97.6044	94.1291	4	1.7727
205	VIM	97.5926	98.2653	6	0.989266		Cluster24
206	TRRAP	97.5808	92.9077	2	3.46462	CLIP	Cluster32
207	SIRT1	97.569	98.3361	5	1.0355		Cluster34
208	AFTPH	97.5572	89.7923	9	1.93996		Cluster19
209	CORO1A	97.5454	96.9672	3	1.52088		Cluster24
210	JAK2	97.5336	98.8553	9	0.763868		Cluster25
211	TOPBP1	97.5218	91.704	5	1.90855		Cluster35
212	SLIT2	97.51	95.6573	5	1.3855		Cluster25
213	PRKD1	97.4982	94.666	3	1.88386		Cluster29
214	KIF2A	97.4864	94.2589	5	1.53636		Cluster18
215	MET	97.4746	96.0113	4	1.45764		Cluster25
216	COPB1	97.4628	87.6151	6	2.65031	CLIP	Cluster19
217	MAPK1	97.451	99.4454	9	0.664374		Cluster25
218	NUP214	97.4392	88.1638	6	2.39203	CLIP	Cluster18
219	FOXO1	97.4274	97.2976	6	1.08037		Cluster29
220	KLHL21	97.4156	95.9818	5	1.3228		Cluster2
221	KDM1A	97.4038	94.9493	3	1.79384		Cluster34
222	CHD8	97.392	88.0812	4	3.14731	CLIP	Cluster32
223	TGFB1	97.3802	95.5983	3	1.65821		Cluster5
224	TLE1	97.3684	93.3798	3	2.02004		Cluster34
225	ACTA1	97.3566	98.3538	4	1.06233		Cluster24
226	PARP4	97.3448	91.8692	3	2.23548	CLIP	Cluster2
227	SMC1A	97.333	95.2915	12	1.09658		Cluster13
228	PTPRA	97.3212	95.7753	3	1.5975		Cluster12
229	GSPT2	97.3035	91.0314	4	2.06718		Cluster14
230	EGFR	97.3035	99.764	17	0.458759		Cluster25
231	RHOG	97.2858	92.2823	3	2.10526		Cluster20
232	CSNK1D	97.274	97.0262	7	1.00926		Cluster27
233	HDAC8	97.2622	92.89	5	1.62138
234	CCT8	97.2504	91.4562	3	2.21475	CLIP	Cluster36
235	CTBP1	97.2386	99.5516	10	0.521411		Cluster34
236	ARID1A	97.2268	90.937	3	2.34183	CLIP	Cluster16
237	NUP37	97.215	97.9349	11	0.754915		Cluster18
238	NFX1	97.2032	88.7892	8	1.93998	CLIP	Cluster26
239	NCBP1	97.1914	98.5957	14	0.627421		Cluster26
240	PPARA	97.1796	95.557	6	1.18966		Cluster33
241	NR3C1	97.1678	95.7399	9	1.05652		Cluster34
242	EIF3B	97.156	89.9575	3	2.60818	CLIP	Cluster14
243	DEPDC1	97.1442	90.3351	4	2.08786
244	BCL6	97.1324	89.3793	3	2.8439
245	MCM2	97.1206	84.8714	5	3.69843	CLIP	Cluster35
246	EIF4B	97.1088	96.7725	5	1.10429		Cluster14
247	TCP1	97.097	92.4829	4	1.76577		Cluster36
248	PELP1	97.0852	92.3708	5	1.60643
249	EHMT2	97.0734	94.908	2	2.03418		Cluster34
250	RPL3	97.0616	92.418	4	1.75937
251	DPYSL3	97.0498	99.1149	5	0.765441		Cluster24
252	IARS	97.038	91.3028	2	3.12099	CLIP	Cluster21
253	AKAP9	97.0262	91.7276	4	1.84461		Cluster27
254	KAT5	97.0144	97.7401	4	1.05858		Cluster32
255	SPAG9	97.0026	95.6396	4	1.34133		Cluster38
256	SHC1	96.9908	98.7609	14	0.566563		Cluster25
257	NUP188	96.979	83.886	6	3.40189	CLIP	Cluster18
258	CTNNA2	96.9672	90.8426	3	2.20745	CLIP	Cluster38
259	SMARCB1	96.9554	96.5306	8	0.955558		Cluster16
260	KARS	96.9436	94.076	2	2.07791		Cluster21
261	YES1	96.9318	99.0913	7	0.631084		Cluster25
262	RPTOR	96.92	89.8631	3	2.41309	CLIP	Cluster29
263	NUP153	96.9082	89.0253	8	1.7908	CLIP	Cluster18
264	DDX23	96.8964	88.3939	9	1.79891		Cluster26
265	CCNB1	96.8846	94.0996	4	1.44843		Cluster35
266	LRP5	96.8728	90.7423	2	3.15074	CLIP	Cluster38
267	STRN4	96.861	90.2466	4	1.96626		Cluster36
268	HLA-B	96.8492	93.6276	4	1.52258
269	HDAC1	96.8374	99.6932	18	0.354331		Cluster34
270	SP1	96.8256	99.6637	9	0.422476		Cluster34
271	DVL1	96.8138	93.2263	4	1.56549
272	TIAM1	96.802	96.2355	2	1.67607		Cluster25
273	EGR1	96.7902	87.6682	3	3.37766
274	KLC2	96.7784	99.3392	4	0.762628		Cluster2
275	ACTL6A	96.7666	97.451	6	0.858934		Cluster16
276	SMAD4	96.7548	98.5721	5	0.749537		Cluster34
277	PSMD4	96.743	96.1529	3	1.3504		Cluster9
278	TP73	96.7312	94.5126	5	1.2483
279	NUP205	96.7194	83.886	6	2.76711	CLIP	Cluster18
280	NFKB1	96.7076	93.1319	5	1.39402
281	DCTN1	96.6958	90.583	2	2.8651	CLIP	Cluster27
282	RASA1	96.684	99.0441	6	0.602942		Cluster25
283	CPSF2	96.6722	90.0283	9	1.50101		Cluster26
284	PSMC5	96.6604	93.2735	5	1.36067
285	TPR	96.6486	87.2197	7	1.96448		Cluster18
286	BCR	96.6368	90.0755	2	3.06236		Cluster25
287	PLXNB1	96.625	92.5183	4	1.54499		Cluster1
288	SCYL1	96.6132	85.721	8	2.0345		Cluster19
289	POLR2L	96.6014	96.2237	12	0.788958		Cluster33
290	PLK4	96.5896	90.1227	4	1.83642
291	TBK1	96.5778	97.0144	4	1.01404		Cluster30
292	MED13L	96.5601	84.8419	5	2.47785	CLIP	Cluster31
293	JUN	96.5601	98.9261	10	0.451866		Cluster34
294	KIF18A	96.5424	97.8582	8	0.653849		Cluster18
295	SRF	96.5306	95.6691	5	1.05657		Cluster34
296	EPS15	96.5188	96.6722	4	1.05568		Cluster19
297	LARS	96.507	93.6453	2	1.95575		Cluster21
298	CSNK2A1	96.4952	98.2771	7	0.626367		Cluster34
299	PCNT	96.4834	86.317	4	2.48128		Cluster27
300	VAV2	96.4716	95.6809	3	1.30561		Cluster25
301	MCM3	96.4598	86.9955	5	2.07997		Cluster35
302	AP1G1	96.448	88.8836	5	1.81598	CLIP	Cluster19
303	CDC5L	96.4362	88.3172	7	1.7071		Cluster26
304	CAP1	96.4244	91.2556	2	2.32413	CLIP	Cluster15
305	CDC40	96.4126	90.9016	9	1.32217		Cluster26
306	MED13	96.4008	87.9042	6	1.82593	CLIP	Cluster31
307	SMARCA5	96.3831	93.958	3	1.48006		Cluster18
308	RHOU	96.3831	95.4685	2	1.62476		Cluster20
309	MED24	96.3654	89.6153	7	1.54135		Cluster31
310	SMG8	96.3536	88.9308	2	3.4047	CLIP	Cluster14
311	ACTB	96.3418	96.1411	6	0.917326		Cluster32
312	SF3B5	96.3299	88.8954	9	1.52674		Cluster26
313	RPL27A	96.3182	94.5244	4	1.25319		Cluster14
314	SMG5	96.3063	92.1761	3	1.69844		Cluster14
315	COPG1	96.2945	86.2757	8	1.88699		Cluster19
316	TAF1	96.2827	88.9899	4	1.91429		Cluster32
317	ITCH	96.2709	93.7928	4	1.30834
318	AP1B1	96.2591	85.3906	4	2.5704	CLIP	Cluster19
319	VCL	96.2473	90.3941	2	2.43716	CLIP	Cluster20
320	FMR1	96.2355	98.8081	3	0.82624		Cluster30
321	VAV1	96.2237	96.625	4	0.994745		Cluster25
322	MSH2	96.2119	94.1704	2	1.73741		Cluster35
323	MTA2	96.2001	95.2443	5	1.02229		Cluster34
324	SMG6	96.1824	88.8482	2	3.08771	CLIP	Cluster14
325	COPB2	96.1824	85.0779	7	2.02482		Cluster19
326	ITSN1	96.1647	97.1796	3	1.06008		Cluster25
327	SMARCD3	96.1529	96.8138	5	0.846336		Cluster16
328	SGK1	96.1411	94.5834	4	1.20306
329	DLC1	96.1293	90.7069	2	2.29205
330	SKA3	96.1175	93.9993	5	1.12057
331	PDGFRB	96.1057	94.5716	3	1.36194
332	PRRC2A	96.0939	89.2731	2	2.73725	CLIP&RNA	Cluster21
333	MBD3	96.0821	94.6955	5	1.0561
334	PPP1CC	96.0703	98.2063	9	0.493645		Cluster18
335	GIT1	96.0585	95.3859	1	2.5019	CLIP	Cluster25
336	TRAF2	96.0467	93.545	2	1.7809
337	PSMD2	96.0349	84.9186	3	3.10506	CLIP	Cluster9
338	AP2S1	96.0231	96.5955	10	0.643793		Cluster19
339	UPF2	96.0113	91.6096	4	1.44901		Cluster14
340	NFYA	95.9995	98.7963	2	0.997455		Cluster23
341	HGS	95.9877	92.6363	3	1.52177
342	USP7	95.9759	88.8246	2	2.74018	CLIP	Cluster9
343	NUP62	95.9641	86.8893	7	1.71442		Cluster18
344	ACTN4	95.9523	93.7692	3	1.38904		Cluster24
345	SEC23A	95.9405	93.5627	7	1.00846		Cluster19
346	HNRNPM	95.9287	96.5778	10	0.621052		Cluster26
347	CTTN	95.9169	98.8671	8	0.374956		Cluster25
348	PTPN1	95.9051	97.4746	7	0.598293		Cluster25
349	CCT2	95.8933	94.7722	4	1.09941		Cluster36
350	JAK3	95.8815	95.3269	6	0.859097		Cluster25
351	GATAD2A	95.8697	93.8282	5	1.07088
352	MYO6	95.8579	99.3687	5	0.439532		Cluster24
353	UBE3A	95.8461	90.819	4	1.49489	CLIP	Cluster34
354	TUBGCP3	95.8343	96.6604	6	0.728903		Cluster27
355	CCT6A	95.8225	90.8072	3	1.70098	CLIP	Cluster36
356	DPYSL2	95.8107	96.448	6	0.740245		Cluster1
357	BRCA2	95.7989	89.1433	2	2.41591		Cluster4
358	CDC16	95.7871	97.2268	6	0.645088		Cluster2
359	SPHK1	95.7753	93.0493	5	1.13445		Cluster36
360	BTRC	95.7635	95.557	5	0.877707		Cluster8
361	CEBPZ	95.7517	89.0666	2	2.39396		Cluster37
362	MAD1L1	95.7399	95.2679	5	0.897826		Cluster18
363	SKIV2L	95.7281	90.8662	3	1.64953		Cluster15
364	HSPA8	95.7163	93.781	2	1.61746		Cluster30
365	ILK	95.7045	97.2032	5	0.685605		Cluster20
366	PXN	95.6927	98.5072	7	0.388858		Cluster25
367	PARD3	95.6809	90.0165	2	2.12564		Cluster38
368	CDK5RAP2	95.6691	87.3259	3	2.10829		Cluster27
369	DCTN2	95.6573	93.6099	5	1.02902		Cluster27
370	LCK	95.6455	99.587	12	0.139019		Cluster25
371	MED16	95.6337	88.5532	7	1.39815
372	NCL	95.6219	92.2705	2	1.7553		Cluster44
373	DKC1	95.6101	92.1289	4	1.2505		Cluster37
374	EIF4G3	95.5983	87.1843	3	2.09455	CLIP	Cluster14
375	IMMT	95.5865	95.9405	1	2.05613		Cluster4
376	TBL1X	95.5747	95.2325	5	0.845569		Cluster2
377	MCM4	95.5629	83.3609	4	2.44439	CLIP	Cluster35
378	NUP88	95.5511	85.4496	7	1.6693		Cluster18
379	MYH11	95.5393	83.6972	3	2.85781
380	PPARGC1A	95.5275	95.3387	9	0.649607		Cluster31
381	TAF6	95.5157	91.586	5	1.16435
382	TNFRSF1A	95.5039	93.2499	4	1.11963
383	CLP1	95.4921	88.565	9	1.25918		Cluster26
384	GRB10	95.4803	92.9667	3	1.29513		Cluster25
385	CSTF1	95.4685	88.8718	9	1.23166		Cluster26
386	MED1	95.4567	88.2582	2	2.31419	CLIP	Cluster31
387	CLSPN	95.4449	83.9981	3	2.55009		Cluster35
388	MED14	95.4331	90.3823	7	1.13018		Cluster31
389	HLA-A	95.4213	98.2299	7	0.366241		Cluster19
390	PPP2CB	95.4095	96.0349	5	0.731121		Cluster36
391	FBXO18	95.3977	87.857	3	1.90328		Cluster15
392	NOTCH2	95.3859	82.641	3	3.71596	CLIP	Cluster34
393	RANGAP1	95.3741	97.7106	8	0.391205		Cluster18
394	EFNB1	95.3623	98.7373	5	0.372335		Cluster25
395	DYRK1A	95.3505	90.1109	4	1.39617
396	DYSF	95.3387	84.6944	2	3.79121		Cluster5
397	NEK2	95.3269	93.9344	5	0.887736		Cluster27
398	PSMC3	95.3151	87.6328	4	1.67277		Cluster9
399	CASP9	95.3033	94.312	4	0.950872		Cluster15
400	ACTC1	95.2915	97.0852	3	0.812194		Cluster24
401	CTDP1	95.2797	84.0453	3	2.35068
402	GSN	95.2679	91.7984	2	1.64606		Cluster20
403	ETF1	95.2561	90.8544	4	1.26697
404	ITGB5	95.2443	88.27	2	2.13898		Cluster5
405	RPS5	95.2325	95.7635	5	0.6969		Cluster14
406	NUP98	95.2207	84.2813	5	1.77833		Cluster18
407	CAV1	95.2089	97.8169	3	0.658343		Cluster25
408	SSRP1	95.1971	83.4258	4	2.10056		Cluster35
409	DLL1	95.1853	91.0845	4	1.19256		Cluster9
410	NUP155	95.1735	84.2105	6	1.6661	CLIP	Cluster18
411	AMPH	95.1617	87.261	3	1.8326		Cluster25
412	NEDD4	95.1499	90.0401	2	1.82637		Cluster5
413	RB1CC1	95.1381	83.6559	3	2.33845	CLIP	Cluster29
414	EIF3A	95.1263	85.0248	2	2.75701		Cluster14
415	SMG9	95.1145	89.2967	3	1.53898
416	CENPQ	95.1027	95.8402	5	0.64102		Cluster18
417	DDB1	95.0909	83.8093	2	3.42796	CLIP	Cluster8
418	PHF1	95.0791	99.528	3	0.370796		Cluster15
419	TUBGCP2	95.0673	91.6332	4	1.10623
420	SKI	95.0555	94.6424	2	1.22793
421	TADA3	95.0437	85.4024	3	1.97967		Cluster32
422	USP9X	95.0319	83.945	2	3.06074	CLIP	Cluster29
423	KAT6B	95.0201	81.0597	5	2.33873		Cluster32
424	NOC2L	95.0083	96.3477	2	1.02532		Cluster37
425	PRKG1	94.9965	91.8574	1	2.50302
426	KIF3A	94.9847	99.4926	7	0.0816134		Cluster2
427	PSMD3	94.9729	86.8657	4	1.54863
428	AURKA	94.9611	97.8995	7	0.255431		Cluster2
429	MDC1	94.9493	87.6446	5	1.36064		Cluster4
430	CSTF2	94.9375	89.1551	9	1.00518		Cluster26
431	PLXNA2	94.9257	91.5447	1	2.4828	CLIP	Cluster1
432	NF2	94.9139	84.2695	3	2.03371		Cluster3
433	DES	94.9021	90.4768	2	1.62074
434	EIF4G2	94.8903	84.895	3	1.93128	CLIP	Cluster14
435	MCM7	94.8785	90.4532	5	1.03673		Cluster35
436	NUP43	94.8667	97.9349	11	0.145918		Cluster18
437	PRC1	94.8548	96.1234	5	0.547174		Cluster2
438	HNRNPU	94.843	95.5039	11	0.398935		Cluster26
439	MTA1	94.8312	91.0845	4	1.07577
440	RPS16	94.8194	95.6219	5	0.570908		Cluster14
441	WDR5	94.8076	95.6101	5	0.569857		Cluster32
442	E2F1	94.7958	95.1853	3	0.846212		Cluster34
443	PLXNA4	94.784	91.5447	1	2.3472	CLIP	Cluster1
444	STK11	94.7722	92.8605	4	0.90686
445	SF3B4	94.7604	92.0935	9	0.685858		Cluster26
446	NUP210	94.7486	84.5409	7	1.38432		Cluster18
447	ING2	94.7368	97.274	5	0.371615		Cluster34
448	EIF3D	94.725	88.2169	2	1.82897		Cluster14
449	ASH2L	94.7132	86.5884	4	1.45057		Cluster32
450	TLN1	94.7014	89.4737	1	3.01768	CLIP	Cluster20
451	NUDC	94.6896	94.2589	5	0.633481
452	EXOC2	94.6778	86.8303	2	1.97412	CLIP	Cluster17
453	PSMD1	94.666	83.8683	2	2.43854	CLIP	Cluster9
454	ANXA2	94.6542	92.6658	2	1.2583		Cluster5
455	FXR1	94.6424	98.7137	2	0.572265		Cluster30
456	HRAS	94.6306	97.333	2	0.772707		Cluster25
457	HBEGF	94.6188	86.5117	2	2.00036
458	PCF11	94.607	88.7125	9	0.936609		Cluster26
459	CDK5R1	94.5952	96.743	4	0.4803		Cluster1
460	ZWILCH	94.5834	94.2589	5	0.609135
461	PHF12	94.5716	92.4947	5	0.761014
462	MTMR2	94.5598	99.9764	1	0.761772		Cluster12
463	PRPF4	94.548	90.2643	9	0.772505		Cluster26
464	TERF2	94.5362	85.5558	3	1.67429		Cluster13
465	DARS	94.5244	97.4392	3	0.513404		Cluster21
466	UBA52	94.5126	99.8348	14	-0.195809		Cluster14
467	RAE1	94.5008	89.3085	9	0.853363		Cluster18
468	EEF1A1	94.489	94.3356	3	0.829836		Cluster23
469	CASC3	94.4772	93.899	5	0.625567
470	TRAF3	94.4654	87.5384	2	1.83808	CLIP	Cluster39
471	B9D2	94.4536	94.9257	5	0.548173
472	RPS6KA3	94.4418	92.4003	4	0.850408
473	YY1	94.43	97.7814	6	0.181674		Cluster34
474	SART1	94.4182	78.5815	5	2.42792		Cluster26
475	PLXNA3	94.4064	94.489	2	1.03707		Cluster1
476	PML	94.3946	90.6774	4	0.995407
477	SMARCD2	94.3828	93.0257	4	0.805216		Cluster16
478	ZBTB16	94.371	82.3106	2	3.10568		Cluster34
479	ARHGAP6	94.3592	96.9672	3	0.547176		Cluster24
480	MED27	94.3474	86.2108	6	1.18539
481	CRMP1	94.3356	89.9988	2	1.46905		Cluster1
482	CARM1	94.3238	92.4357	3	0.959434		Cluster34
483	EEF2	94.312	81.1069	3	2.44231	CLIP	Cluster14
484	STK3	94.3002	93.5096	4	0.738682		Cluster36
485	MCM6	94.2884	80.3753	3	2.78189	CLIP	Cluster35
486	PRKCA	94.2766	92.3236	2	1.21126
487	RANBP2	94.2648	82.7354	2	2.69019	CLIP	Cluster13
488	HNRNPF	94.253	91.6214	9	0.612846		Cluster26
489	TAOK1	94.2412	95.0378	5	0.497994
490	BAP1	94.2294	84.1633	2	2.14723
491	ACTL6B	94.2176	93.4506	4	0.732455		Cluster16
492	EIF3I	94.2058	88.6181	2	1.60704
493	RCC2	94.194	94.2589	5	0.550042
494	RAC1	94.1822	99.8938	15	-0.279831		Cluster25
495	DYNC1I2	94.1704	89.0017	4	1.10085
496	EP400	94.1527	82.582	2	2.66197	CLIP	Cluster32
497	STAT5A	94.1527	84.9776	2	2.01364
498	SH3PXD2B	94.135	85.5027	2	1.94795	CLIP	Cluster20
499	XAB2	94.1232	78.912	4	2.51599		Cluster26
500	CEP164	94.1114	90.0991	3	1.14861		Cluster27
501	SPDL1	94.0996	95.1027	5	0.474662		Cluster18
502	PCBP1	94.0878	92.0699	9	0.551316		Cluster26
503	NCK2	94.076	98.0824	4	0.241731		Cluster25
504	HNRNPK	94.0642	96.8492	11	0.121644		Cluster26
505	MAPRE1	94.0524	97.8759	9	0.0321272		Cluster27
506	SMAD7	94.0406	94.8194	3	0.72064
507	ANAPC2	94.0288	86.6179	2	1.80214
508	GSK3B	94.017	97.687	5	0.180961		Cluster38
509	PHF20	94.0052	82.6882	3	1.9582		Cluster32
510	FOXO4	93.9934	89.4855	3	1.18068
511	ARHGEF7	93.9816	95.9818	3	0.591978		Cluster25
512	RPA1	93.9698	82.2634	4	1.78987		Cluster35
513	CHRM3	93.9521	88.7538	1	2.58612
514	MED15	93.9521	89.5445	7	0.815563		Cluster31
515	NCOR2	93.9344	90.7423	1	2.08657	CLIP	Cluster34
516	CALM3	93.9226	99.7522	13	-0.254611		Cluster17
517	RACGAP1	93.9108	82.4286	2	2.56069		Cluster2
518	REV3L	93.8931	83.7267	3	1.73492		Cluster35
519	EPHB1	93.8931	93.5627	1	1.67389
520	EGF	93.8754	98.4895	10	-0.0257982		Cluster25
521	OBSCN	93.8636	87.8216	1	2.90358	CLIP	Cluster24
522	TEX10	93.8518	86.3878	4	1.26984		Cluster32
523	NTN1	93.84	92.89	2	1.0821
524	BARD1	93.8282	90.1581	4	0.928711		Cluster8
525	CEP192	93.8164	85.1605	3	1.53426		Cluster27
526	TAF6L	93.8046	94.0642	6	0.439506
527	SMG7	93.7928	89.8985	3	1.09724
528	MAP3K5	93.781	91.1848	2	1.22122		Cluster5
529	RPL8	93.7692	93.3679	4	0.650472		Cluster14
530	KAT6A	93.7574	77.4959	4	2.82537	CLIP	Cluster32
531	NUMB	93.7456	97.7224	6	0.0896096		Cluster38
532	EIF4A2	93.7338	83.9155	3	1.62543	CLIP	Cluster14
533	SETDB1	93.722	85.1369	2	1.84705		Cluster16
534	CD74	93.7102	94.4772	9	0.287901		Cluster19
535	EIF2S2	93.6984	94.4182	3	0.671631		Cluster14
536	DOCK9	93.6866	84.7416	2	1.88483
537	DSP	93.6748	85.78	1	4.01764	CLIP	Cluster38
538	POLR3C	93.663	87.68	3	1.27959
539	PCNA	93.6512	98.6311	8	-0.0275595		Cluster35
540	RPS3	93.6394	97.6634	7	0.0377095		Cluster14
541	RARA	93.6276	96.2532	6	0.216397		Cluster33
542	ERCC3	93.6158	86.73	3	1.34841
543	PSMA3	93.604	97.1914	5	0.178821		Cluster9
544	RAD21	93.5922	85.3434	3	1.45781		Cluster13
545	MCRS1	93.5804	88.5886	4	1.02038
546	CEP131	93.5686	87.3967	4	1.13085
547	MAPK8IP3	93.5568	89.1846	1	2.18936		Cluster5
548	DAB2	93.545	82.0864	2	2.40878
549	IRS4	93.5332	87.261	1	2.75888
550	CCAR1	93.5214	90.7836	9	0.557294		Cluster26
551	SPC25	93.5096	94.2589	5	0.42653
552	YEATS4	93.4978	82.4699	2	2.27078
553	VCP	93.486	87.4203	1	2.64579	CLIP	Cluster23
554	POLA1	93.4742	86.2993	3	1.34266		Cluster35
555	AGO2	93.4624	93.9698	3	0.654451		Cluster30
556	NINL	93.4506	86.317	3	1.3354
557	NUP93	93.4388	85.2549	7	1.02378		Cluster18
558	SKP2	93.427	95.7222	6	0.226775		Cluster8
559	RAF1	93.4152	96.0526	1	1.22765		Cluster29
560	SUGP1	93.4034	89.2613	9	0.65217		Cluster26
561	TGFBR2	93.3916	91.2143	2	1.12068
562	ILF3	93.3798	89.1315	4	0.922775		Cluster35
563	PSMA4	93.3679	96.2709	4	0.303806		Cluster9
564	MDM2	93.3561	98.9851	7	-0.11387		Cluster34
565	NOTCH3	93.3443	77.9679	3	2.81901	CLIP	Cluster34
566	MAPK12	93.3325	95.0555	4	0.416868		Cluster38
567	PHTF1	93.3207	91.1494	2	1.11051
568	TMEM8A	93.3089	89.4383	1	2.04752
569	BRAF	93.2971	96.4952	2	0.614853		Cluster22
570	CENPU	93.2853	95.9287	5	0.240419		Cluster18
571	BBS10	93.2735	81.0715	4	1.74983
572	GPC1	93.2617	96.5542	5	0.180464		Cluster25
573	MAP1B	93.2499	85.7918	1	2.88862	CLIP	Cluster25
574	SNRPA	93.2322	89.3203	9	0.615035		Cluster26
575	POLE	93.2322	79.1952	3	2.3199	CLIP	Cluster35
576	GRB2	93.2145	99.882	20	-0.482269		Cluster25
577	PRPF31	93.2027	87.0368	6	0.901668		Cluster32
578	CRK	93.1909	99.5162	12	-0.364188		Cluster25
579	SLK	93.1791	86.4409	2	1.53377		Cluster44
580	UBTF	93.1673	78.9002	4	2.02325		Cluster33
581	MED23	93.1555	88.7774	8	0.678544
582	CSK	93.1437	90.2053	3	0.915041
583	BMP4	93.1319	80.2219	2	2.84403
584	BAZ1A	93.1201	90.3705	1	1.82002		Cluster37
585	RPS6KB1	93.1083	99.0736	7	-0.164427		Cluster29
586	MLST8	93.0965	91.8456	3	0.771157
587	UPF3B	93.0847	97.8877	13	-0.120132		Cluster26
588	MCM5	93.0729	84.8596	5	1.07519		Cluster35
589	U2AF2	93.0611	93.1614	9	0.281882		Cluster26
590	EIF2AK2	93.0493	93.0965	3	0.664071		Cluster30
591	CEBPB	93.0375	92.2115	4	0.586689
592	JAG1	93.0257	83.0658	3	1.57745		Cluster39
593	CASK	93.0139	95.8933	1	1.15108		Cluster11
594	RPL29	93.0021	93.4742	4	0.498946		Cluster14
595	ARHGDIA	92.9903	97.5572	3	0.215025		Cluster20
596	PAFAH1B1	92.9785	98.9025	12	-0.289066		Cluster27
597	PSMD13	92.9667	86.4763	4	1.03203
598	SF3A3	92.9549	90.5948	9	0.446096		Cluster26
599	HLA-DRB1	92.9431	96.7076	9	0		Cluster19
600	SEC13	92.9313	98.1355	10	-0.157924		Cluster18
601	UBAP2L	92.9195	87.0958	1	2.22656	CLIP	Cluster15
602	SMARCE1	92.9077	97.3566	8	-0.00801358		Cluster16
603	DPYSL5	92.8959	90.4413	2	1.06514		Cluster1
604	GTF3C1	92.8841	75.6195	3	3.43703	CLIP	Cluster33
605	POLR3B	92.8723	76.0562	3	3.09727		Cluster33
606	MED7	92.8605	89.7097	8	0.537044
607	CREB1	92.8487	97.1088	4	0.135421		Cluster29
608	PPP1R12A	92.8369	91.3146	2	0.973501
609	STRN	92.8251	91.9283	4	0.559277		Cluster36
610	TAF7	92.8133	88.034	4	0.884278
611	MED30	92.8015	88.0104	7	0.679704
612	MAPK3	92.7897	93.4388	2	0.804264
613	PSME4	92.7779	80.6349	2	2.33735	CLIP	Cluster9
614	MYC	92.7661	98.5249	6	-0.143295		Cluster34
615	RNPS1	92.7543	98.0824	13	-0.213449		Cluster26
616	PTBP1	92.7425	90.6125	9	0.40531		Cluster26
617	CACNA1B	92.7307	79.1126	3	2.0753
618	PPP2R5A	92.7189	85.2372	1	2.51118
619	MYO3A	92.7071	97.1619	3	0.209006		Cluster24
620	PPARG	92.6953	96.7312	7	0		Cluster33
621	NUF2	92.6835	96.0939	5	0.130903		Cluster18
622	TP53BP2	92.6717	85.308	1	2.47708	CLIP	Cluster15
623	FANCD2	92.6599	89.7215	1	1.76258		Cluster4
624	USO1	92.6481	90.3351	2	1.02781		Cluster7
625	AP1S1	92.6363	92.1466	11	0.220627		Cluster19
626	PSMB5	92.6245	84.8242	4	1.07846		Cluster9
627	SLC9A3R2	92.6127	85.5912	1	2.37146
628	COPE	92.6009	86.6887	7	0.744033		Cluster19
629	TUBGCP6	92.5891	86.553	3	1.09448
630	DDX54	92.5773	83.6382	1	3.00215		Cluster37
631	BIRC5	92.5655	98.6429	10	-0.339985		Cluster18
632	APBB1	92.5537	81.2721	2	2.06542		Cluster42
633	CENPJ	92.5419	87.2787	3	1.03088
634	NOP58	92.5301	97.6339	6	-0.0676287		Cluster22
635	FLNC	92.5183	77.5431	2	3.72569	CLIP	Cluster20
636	SETD1A	92.5006	80.0684	2	2.30793		Cluster32
637	MED11	92.5006	87.9632	7	0.625075
638	WNK1	92.4829	86.3583	1	2.15245	CLIP	Cluster25
639	CDCA8	92.4711	94.9729	5	0.173919
640	PTPRJ	92.4534	83.3137	3	1.37234		Cluster13
641	ESPN	92.4534	96.9967	3	0.187527		Cluster24
642	STAM	92.4357	90.2289	4	0.625595
643	RPL18	92.4239	93.8046	4	0.335035
644	NCOA6	92.4121	85.6502	2	1.40252		Cluster32
645	EXOC1	92.4003	84.5882	2	1.47678
646	PKP4	92.3885	79.1775	2	2.48505	CLIP	Cluster38
647	BRPF1	92.3767	75.0767	3	2.95139	CLIP	Cluster32
648	PSMD7	92.3649	87.4793	4	0.861102
649	POLR2E	92.3531	96.4362	12	-0.085173		Cluster33
650	PSMD8	92.3413	86.0397	4	0.939744
651	PHF10	92.3295	93.0257	4	0.403853		Cluster16
652	ILF2	92.3177	85.6148	6	0.807608		Cluster35
653	KIF3C	92.3059	79.266	4	1.67756	RNA	Cluster2
654	ARHGEF2	92.2941	86.8185	1	2.05316		Cluster5
655	EFNB2	92.2823	97.0498	2	0.362834		Cluster25
656	DPYSL4	92.2705	89.9988	2	0.997729		Cluster1
657	MED20	92.2587	89.102	8	0.479632		Cluster31
658	DST	92.2469	84.2341	1	2.42827		Cluster13
659	SIN3B	92.2351	91.9519	2	0.811305
660	RPL4	92.2233	94.3238	4	0.256183
661	COPS5	92.2115	91.6686	3	0.60046		Cluster14
662	NDEL1	92.1997	96.7194	7	-0.0320131		Cluster18
663	CETN2	92.1879	89.3616	4	0.655383
664	ITGAV	92.1761	96.6958	2	0.375885		Cluster25
665	RPS13	92.1643	97.2622	7	-0.113908		Cluster14
666	STAT6	92.1525	85.9098	5	0.800621
667	MYB	92.1407	91.9637	3	0.55543
668	THRA	92.1289	90.465	5	0.4435
669	CAD	92.1112	82.3932	1	3.29641	CLIP	Cluster25
670	PPARGC1B	92.1112	78.3809	3	1.9279
671	CBX4	92.0935	86.5353	2	1.22804
672	STAG2	92.0817	78.853	2	2.29411	CLIP	Cluster13
673	MYOM2	92.0699	86.5707	1	1.93369		Cluster24
674	FUS	92.0522	88.6004	9	0.421161		Cluster26
675	FDFT1	92.0522	96.4716	2	0.352434		Cluster23
676	ANAPC1	92.0345	82.4994	1	3.03802	CLIP	Cluster8
677	PKD1	92.0227	83.2783	2	1.52872		Cluster42
678	EIF4EBP1	92.0109	88.329	4	0.674945
679	PKP2	91.9991	81.9566	1	3.55643		Cluster38
680	CALM1	91.9873	99.7994	13	-0.767102		Cluster17
681	P4HA2	91.9755	91.4267	1	1.31979
682	PSMC2	91.9637	86.1931	3	0.969569
683	SIRPA	91.9519	80.0566	2	2.03858
684	TYRO3	91.9401	86.0279	1	1.93891		Cluster5
685	EPHB2	91.9283	87.8688	1	1.73417	CLIP&RNA	Cluster25
686	SNRPD2	91.9164	94.6188	10	-0.00319761		Cluster26
687	SRSF4	91.9047	90.6538	10	0.196584		Cluster26
688	NR4A1	91.8928	87.9396	3	0.82921
689	TBL1XR1	91.881	96.92	7	-0.150165		Cluster2
690	CDC42	91.8692	99.6106	10	-0.707569		Cluster38
691	ARCN1	91.8574	85.3316	7	0.663372		Cluster19
692	EPHX4	91.8456	84.5173	1	2.0866
693	NCK1	91.8338	99.0559	4	-0.249991		Cluster25
694	KAT8	91.822	83.4081	3	1.17975
695	HIP1	91.8102	79.7321	2	2.01683	CLIP	Cluster29
696	MAP3K3	91.7984	86.4645	1	1.8427
697	PSMD6	91.7866	85.5204	4	0.83978		Cluster9
698	EPS15L1	91.7748	88.0222	2	1.02333
699	ERCC2	91.763	85.8508	3	0.942443
700	MGA	91.7512	78.5048	2	2.16322	CLIP	Cluster32
701	PSMD14	91.7394	86.5884	4	0.755
702	DDX20	91.7276	91.9755	2	0.673146
703	RAPGEF1	91.7158	81.8858	1	3.01903	CLIP	Cluster25
704	NUP85	91.704	98.0352	11	-0.443007		Cluster18
705	ANAPC5	91.6922	86.1105	2	1.16031		Cluster8
706	KCNQ3	91.6804	92.7425	4	0.256978		Cluster12
707	VDAC1	91.6686	92.5773	1	1.13922		Cluster42
708	SF3A2	91.6568	97.4864	10	-0.368065		Cluster26
709	DDX5	91.645	86.2875	2	1.13491		Cluster26
710	PDGFB	91.6332	92.5065	2	0.613447
711	PSMC4	91.6214	85.662	3	0.923622
712	NGFR	91.6096	93.6748	2	0.521484
713	TAF4	91.5978	91.2438	5	0.258804
714	ARHGEF12	91.586	80.6467	2	1.79861	CLIP	Cluster25
715	PSMB1	91.5742	87.0073	3	0.828839
716	MED17	91.5624	89.1846	7	0.325496		Cluster31
717	CEP290	91.5506	87.9868	3	0.747959
718	KALRN	91.5388	85.1959	1	1.9049	CLIP	Cluster25
719	PRPF19	91.527	84.7239	6	0.66307		Cluster26
720	CDK19	91.5152	87.9278	7	0.421363
721	EIF5B	91.5034	87.143	1	1.67655		Cluster14
722	PSMB4	91.4916	88.683	4	0.555137
723	DECR1	91.4798	83.7385	1	2.08329
724	PAK2	91.468	93.1909	3	0.308228		Cluster1
725	PPP4R1	91.4562	84.3698	1	1.93872		Cluster36
726	FLOT1	91.4444	92.3708	1	1.08978
727	USP2	91.4326	91.2674	1	1.19128
728	HDAC9	91.4208	98.4423	8	-0.500988		Cluster34
729	EIF3E	91.409	92.4534	3	0.35296		Cluster14
730	LIMA1	91.3972	87.0545	2	1.01201
731	SORBS1	91.3854	91.7394	5	0.186629
732	CENPN	91.3736	95.8402	5	-0.0399865		Cluster18
733	HDAC7	91.3618	88.6948	6	0.369288
734	NFASC	91.35	99.5988	5	-0.602221		Cluster12
735	RPL34	91.3382	92.1171	4	0.23538		Cluster14
736	WDR82	91.3264	91.1022	3	0.447259		Cluster36
737	POLR2I	91.3146	94.4654	10	-0.115915		Cluster26
738	ARHGEF11	91.3028	82.6292	2	1.41439		Cluster1
739	CALM2	91.2851	99.8112	14	-0.968466		Cluster17
740	CXXC1	91.2851	78.4753	3	1.61001
741	CENPA	91.2674	96.2532	5	-0.101296		Cluster18
742	NOP14	91.2556	79.9622	2	1.76369
743	ITGA2	91.2379	89.6625	1	1.31427
744	RPS6KA5	91.2379	89.3616	3	0.566646
745	FGFR1OP	91.2202	86.9011	3	0.754276
746	SREBF1	91.2084	80.9653	4	1.15226		Cluster31
747	EXOC7	91.1966	90.2466	3	0.486467
748	NR3C2	91.1848	83.1013	1	2.09847
749	NCR1	91.173	93.4624	4	0.139019		Cluster16
750	EYA2	91.1612	88.9485	1	1.37408
751	ABCD1	91.1494	95.5865	1	0.738651		Cluster23
752	AP1M2	91.1376	82.0628	5	0.912148
753	CDK8	91.1258	91.0078	9	0.0680112		Cluster31
754	DTNB	91.114	92.9431	1	0.973111
755	ABCD3	91.1022	98.9497	2	-0.0463501		Cluster23
756	RPS6KA2	91.0904	77.5962	2	2.05801	CLIP	Cluster19
757	MAGI2	91.0786	90.6361	3	0.42782
758	RPS19	91.0668	95.6927	5	-0.105617		Cluster14
759	DOCK6	91.055	80.2455	1	3.02374	CLIP	Cluster25
760	MED9	91.0432	87.0368	7	0.373252
761	IFT88	91.0314	99.7876	1	0.145975		Cluster30
762	MAPK8	91.0196	99.5044	5	-0.667076		Cluster21
763	SRRM1	91.0078	89.456	9	0.142788		Cluster26
764	RPA2	90.996	81.756	4	0.996604		Cluster35
765	ITGA6	90.9842	91.7571	3	0.303127		Cluster5
766	BUB3	90.9724	96.684	7	-0.329316		Cluster18
767	CEP78	90.9606	84.1102	3	0.872783
768	PSMD11	90.9488	85.9924	4	0.606203
769	EIF3G	90.937	88.2169	2	0.810407
770	RIPK2	90.9252	81.8563	1	2.22026
771	FBXW11	90.9134	81.3429	2	1.44935	CLIP	Cluster8
772	ITGA5	90.9016	84.9422	1	1.66971
773	BRD1	90.8898	73.7137	3	2.10671	CLIP	Cluster32
774	FEN1	90.878	77.8735	2	1.91986		Cluster35
775	NFYC	90.8662	98.8789	2	-0.0906186		Cluster23
776	FZD1	90.8544	81.6616	3	1.1276
777	MATN2	90.8426	87.2197	1	1.44429
778	THRAP3	90.8308	76.2155	3	1.73751		Cluster31
779	SMC1B	90.819	80.2042	2	1.58713
780	YWHAE	90.8013	97.9939	9	-0.62251		Cluster27
781	RBX1	90.8013	97.0675	9	-0.478081		Cluster8
782	DBF4	90.7836	78.2511	3	1.48732
783	SOCS3	90.7718	92.3059	4	0.133423
784	BLM	90.76	80.0212	1	2.76193		Cluster4
785	GEMIN4	90.7482	80.2691	1	2.70076		Cluster26
786	KAT2B	90.7364	98.6901	9	-0.782704		Cluster32
787	FBXL5	90.7246	81.7442	4	0.957462		Cluster8
788	TRPC5	90.7128	82.346	2	1.28554
789	HIST1H4J	90.701	93.4034	1	0.850646
790	CLTB	90.6892	81.4314	4	0.980219
791	CEP135	90.6774	84.1102	3	0.830686
792	GSK3A	90.6656	90.5476	3	0.35871
793	RBBP8	90.6538	81.5435	2	1.39152
794	HAP1	90.642	91.1612	2	0.52104
795	RXRG	90.6302	86.2521	2	0.909927
796	RUNX2	90.6184	94.6955	3	0.0582548		Cluster34
797	ULK1	90.6066	79.1775	3	1.3424
798	CACHD1	90.5948	85.3198	2	0.966765
799	EFNA1	90.583	89.5327	3	0.434604
800	MAPK14	90.5712	98.5072	4	-0.460913		Cluster38
801	PTEN	90.5594	98.1237	3	-0.233562		Cluster25
802	DOCK11	90.5476	80.2455	1	2.52259	CLIP	Cluster25
803	MAPK11	90.5358	96.7548	5	-0.322135		Cluster38
804	GTF2F2	90.524	93.8164	9	-0.197847		Cluster26
805	BMP2	90.5122	82.1218	1	2.02633
806	EIF4H	90.5004	95.2207	5	-0.17281		Cluster14
807	SH2D3C	90.4886	82.8062	2	1.18666
808	TRIP6	90.4768	78.7586	1	3.04492
809	BRPF3	90.465	73.7137	3	1.96948	CLIP	Cluster32
810	PRMT2	90.4532	89.8867	2	0.586856
811	PPP2CA	90.4413	98.0175	3	-0.248089		Cluster36
812	IMP3	90.4295	93.0729	2	0.333388
813	RBBP4	90.4177	99.7345	9	-1.14763		Cluster34
814	CACNA1G	90.4059	74.3805	2	2.27709
815	HNRNPR	90.3941	90.878	10	-0.00439641		Cluster26
816	NEK9	90.3823	87.7862	1	1.29061		Cluster45
817	PIK3R3	90.3705	91.114	5	0.0746587		Cluster25
818	VEGFA	90.3587	97.5867	5	-0.466661		Cluster1
819	CDK9	90.3469	94.8312	4	-0.0515207		Cluster33
820	CENPO	90.3351	95.8402	5	-0.241273		Cluster18
821	MAP3K11	90.3233	82.3696	1	1.92406
822	SMAD2	90.3115	99.1975	10	-1.00629		Cluster34
823	GPANK1	90.2997	93.2145	1	0.791767
824	TCF4	90.2879	84.8124	3	0.71123
825	CHAF1B	90.2761	91.4267	1	0.927
826	HIST2H2AC	90.2643	84.2577	1	1.58083		Cluster44
827	ALB	90.2525	89.6743	2	0.58281
828	CUL2	90.2407	79.6554	2	1.5036		Cluster8
829	FBXL3	90.2289	76.9943	2	1.86861
830	THRB	90.2171	85.9334	2	0.847169
831	CDH3	90.2053	84.0217	2	0.981522
832	PTPN12	90.1935	87.798	2	0.728253
833	PSMA2	90.1817	95.2561	7	-0.321491		Cluster9
834	CCNF	90.1699	76.5164	2	1.90653
835	HIST1H4C	90.1581	93.4034	1	0.755708		Cluster34
836	TRIO	90.1463	78.7468	1	2.74078	CLIP	Cluster20
837	POLB	90.1345	95.4095	5	-0.241004		Cluster2
838	SQLE	90.1227	87.4498	1	1.27606		Cluster23
839	TFAP2A	90.1109	85.5027	1	1.41746
840	THBS1	90.0991	88.2405	1	1.18141		Cluster5
841	PLEC	90.0873	77.7437	1	3.29518	CLIP	Cluster14
842	NDE1	90.0755	97.0675	6	-0.516539		Cluster27
843	CENPM	90.0637	94.2589	5	-0.165493
844	SEMA3A	90.0519	94.6778	2	0.144612		Cluster1
845	ORC3	90.0401	82.1572	3	0.909408		Cluster35
846	ABL2	90.0283	85.8508	4	0.447164
847	SH3PXD2A	90.0165	83.5379	3	0.752986
848	SNRNP40	90.0047	88.3939	9	0.0496242		Cluster26
849	PTPN13	89.9929	78.4517	1	2.60481	CLIP	Cluster23
850	TUBGCP4	89.9811	86.553	3	0.525452
851	CDK7	89.9693	92.9313	3	0.0731066
852	NIFK	89.9575	96.7902	4	-0.346267		Cluster37
853	MORF4L1	89.9457	97.3448	10	-0.754063		Cluster34
854	EXOSC10	89.9339	78.5579	3	1.23427		Cluster10
855	RIMS1	89.9221	79.5138	2	1.42153		Cluster6
856	DVL3	89.9103	86.8008	2	0.724669
857	CACNG3	89.8985	79.7616	2	1.39533
858	PRKAR2B	89.8867	93.9108	5	-0.166591		Cluster27
859	POLR3A	89.8749	70.9464	2	3.18748	CLIP	Cluster33
860	H3F3A	89.8631	99.3156	7	-1.02344		Cluster32
861	CPSF7	89.8513	91.9164	9	-0.16398		Cluster26
862	RBPJ	89.8395	91.5624	6	-0.0400549
863	SEC23B	89.8277	69.2707	3	2.5164	CLIP	Cluster19
864	TNKS	89.8159	77.5313	2	1.63145	CLIP	Cluster13
865	PSMC6	89.8041	87.3377	4	0.325382
866	PSMB6	89.7923	85.544	4	0.428858
867	BIRC2	89.7805	90.6125	2	0.399316
868	CNTRL	89.7687	84.1102	3	0.641497
869	EPHA6	89.7569	90.4177	1	0.901712
870	RPS14	89.7451	95.9641	5	-0.393739		Cluster14
871	TYK2	89.7333	89.6507	2	0.476086
872	VCAM1	89.7215	90.282	3	0.19893
873	EIF3C	89.7097	78.7232	1	2.32304
874	GANAB	89.6979	91.4267	1	0.795565		Cluster30
875	PPP1R15A	89.6861	76.835	1	3.06625	CLIP	Cluster36
876	MAML1	89.6743	80.6939	5	0.737218
877	IL6ST	89.6625	76.5046	2	1.68898
878	DPF3	89.6507	93.0257	4	-0.0496842		Cluster16
879	AAAS	89.6389	84.5409	7	0.247025		Cluster18
880	RPS6	89.6271	96.8374	6	-0.619875		Cluster14
881	SQSTM1	89.6153	94.6306	1	0.516611
882	FBXO27	89.6035	75.2183	2	1.82668
883	EXOC4	89.5917	79.679	1	2.08387	CLIP	Cluster17
884	B2M	89.5799	96.6132	6	-0.582534		Cluster19
885	PTPRZ1	89.5681	74.7286	2	1.8945	CLIP	Cluster25
886	MAP2K1	89.5563	89.456	1	0.943757
887	H2AFX	89.5445	84.9304	2	0.762118		Cluster4
888	YWHAQ	89.5327	96.802	5	-0.544303		Cluster29
889	MIS12	89.5209	98.0529	6	-0.805449		Cluster18
890	PDCD11	89.5091	75.9146	1	3.48564	CLIP	Cluster37
891	RPS24	89.4973	96.2001	5	-0.463393		Cluster14
892	YARS	89.4855	82.0746	1	1.68094		Cluster21
893	YBX1	89.4737	96.2945	10	-0.726027		Cluster26
894	ZFYVE16	89.4619	80.2042	2	1.24145		Cluster42
895	CACNA1I	89.4501	74.3805	2	1.8923
896	DCTN3	89.4383	91.881	5	-0.0875257		Cluster27
897	SVIL	89.4265	77.1536	1	2.66293	CLIP	Cluster20
898	CD2BP2	89.4147	90.9134	9	-0.173291		Cluster26
899	PSME1	89.4029	82.9242	3	0.711279
900	YAP1	89.3911	90.3587	3	0.145357		Cluster3
901	KAT2A	89.3793	86.9601	4	0.254899
902	NOS3	89.3675	96.5188	3	-0.282876		Cluster25
903	H3F3B	89.3557	98.8199	6	-1.03981		Cluster32
904	NAP1L3	89.3439	88.4824	1	0.988216
905	PRKCD	89.3321	80.8001	2	1.15428
906	MMP7	89.3203	85.5735	1	1.21803
907	ECT2	89.3085	83.2547	2	0.88949
908	HNRNPL	89.2967	89.5917	9	-0.0801669		Cluster26
909	PHF21A	89.2849	93.7102	5	-0.251924
910	BNIP2	89.2731	94.908	4	-0.266798
911	EXOSC4	89.2613	74.9115	2	1.77268
912	GTF3C3	89.2495	72.3979	3	1.76051		Cluster33
913	RBBP5	89.2377	92.5419	6	-0.230168		Cluster32
914	MAPK8IP1	89.2259	80.3989	1	1.90415
915	CUL7	89.2141	75.3599	1	3.33095	CLIP	Cluster8
916	TUFM	89.2023	79.8442	1	1.94308
917	TEK	89.1905	80.8119	2	1.12584
918	SNRNP70	89.1787	89.7451	9	-0.11721		Cluster26
919	YWHAH	89.1669	95.0378	5	-0.424876
920	TUBA1A	89.1551	84.0571	3	0.534707		Cluster29
921	SYNCRIP	89.1315	91.3618	3	0.033222
922	SNUPN	89.1315	74.2152	2	1.81962
923	RAD23A	89.1315	84.4465	4	0.369995		Cluster9
924	GAS2	89.1079	96.9318	3	-0.394781		Cluster24
925	VANGL2	89.0961	99.8702	2	-0.692943		Cluster30
926	HEY2	89.0843	85.1959	1	1.19213
927	POLR2G	89.0725	94.7958	9	-0.601861		Cluster26
928	CDC25A	89.0607	82.5112	1	1.49493
929	FBXO6	89.0489	75.2183	2	1.67163
930	PABPC1	89.0371	87.3082	2	0.529604		Cluster14
931	NCBP2	89.0253	98.4069	13	-1.34996		Cluster26
932	CDKN1A	89.0135	94.371	5	-0.390348		Cluster8
933	LAMA1	89.0017	79.5492	2	1.20338		Cluster39
934	NAP1L2	88.9899	88.4824	1	0.922728
935	BYSL	88.9781	80.8709	2	1.06806		Cluster22
936	RPS20	88.9663	98.3125	8	-1.12946		Cluster14
937	CBX8	88.9544	86.1695	2	0.582616
938	NEDD1	88.9426	84.3285	3	0.479533
939	DLG1	88.9308	96.4598	1	0.232991		Cluster12
940	STAT5B	88.919	82.287	3	0.681069		Cluster5
941	CDC23	88.9072	87.1194	2	0.516955
942	MAX	88.8954	98.3951	8	-1.19386		Cluster32
943	ORC1	88.8836	76.9707	3	1.17125		Cluster35
944	RGMA	88.8718	76.1152	2	1.5154		Cluster42
945	YWHAB	88.86	98.2535	7	-1.0937		Cluster29
946	CRKL	88.8482	93.9462	4	-0.275046
947	RPL11	88.8364	91.4916	4	-0.0743379	RNA	Cluster14
948	CTNND2	88.8246	78.3337	1	2.04857	CLIP	Cluster38
949	TNIK	88.8128	75.7907	1	2.59378	CLIP	Cluster25
950	SMAD1	88.801	81.697	3	0.724112
951	PCGF5	88.7892	80.9063	1	1.65377
952	EPHA4	88.7774	93.5332	1	0.473019
953	RHEB	88.7656	91.468	2	0.162532
954	ZFPM1	88.7538	88.3054	2	0.397602
955	RPL18A	88.742	92.6953	4	-0.183497
956	PPP1CB	88.7302	93.2617	4	-0.222023
957	IL4R	88.7184	81.5671	3	0.724479
958	GTF2B	88.7066	84.1751	3	0.45267
959	CEP63	88.6948	85.0366	3	0.390851
960	PPT2	88.683	99.351	3	-0.857114		Cluster15
961	NRCAM	88.6653	83.3491	4	0.411715	RNA	Cluster12
962	POLE4	88.6653	85.9806	1	1.05511
963	RIPK1	88.6476	92.1643	1	0.547568
964	TJP2	88.6358	76.1565	1	2.391
965	C1QBP	88.624	86.7713	1	0.990762
966	FOXO3	88.6122	85.2136	1	1.10212
967	PLK2	88.6004	71.5129	2	2.0691		Cluster13
968	PSEN1	88.5886	97.6339	6	-0.979039		Cluster38
969	GLI2	88.5768	73.6134	1	3.79979		Cluster34
970	HMGCR	88.565	89.9457	1	0.729289		Cluster23
971	CSTF3	88.5532	89.574	9	-0.204881		Cluster26
972	FKBP8	88.5414	81.7796	2	0.903353
973	BRD8	88.5296	79.0477	2	1.15983		Cluster32
974	FBXW7	88.5178	86.3465	3	0.290151
975	NEDD9	88.506	75.1121	1	2.60865	CLIP	Cluster25
976	LIG4	88.4942	77.1418	1	2.15642	CLIP	Cluster35
977	NME4	88.4824	97.2386	2	-0.284604		Cluster23
978	CDH11	88.4706	92.7897	1	0.487396
979	ULK2	88.4529	74.8053	3	1.28021
980	EFNB3	88.4529	96.507	2	-0.206006		Cluster25
981	CDK4	88.4293	90.5594	1	0.652349		Cluster35
982	AP1M1	88.4293	83.945	5	0.214519
983	KANSL1	88.4116	81.5022	3	0.693353
984	PHB	88.3998	76.7642	1	2.19282		Cluster16
985	YWHAZ	88.388	97.9703	6	-1.07183		Cluster29
986	DAG1	88.3762	83.4671	1	1.23734		Cluster3
987	CNTN1	88.3644	95.4685	4	-0.492609		Cluster5
988	CDH8	88.3526	92.7897	1	0.472267
989	CD44	88.3408	98.3715	5	-1.07263		Cluster20
990	MAPRE3	88.329	94.5598	4	-0.41029
991	MAP2K4	88.3172	90.5004	2	0.174834
992	SAP18	88.3054	96.5955	6	-0.839917		Cluster34
993	LAMA5	88.2936	75.7612	2	1.4261
994	LAMB1	88.2818	77.1005	2	1.31762		Cluster39
995	PSME3	88.27	85.2254	3	0.320305
996	SKIL	88.2582	84.3993	2	0.5796
997	DMD	88.2464	92.9195	1	0.440632
998	BAZ2A	88.2346	75.4897	1	2.33597	CLIP	Cluster34
999	ZWINT	88.2228	97.8405	6	-1.10867		Cluster18
1000	EIF4E	88.211	98.9674	8	-1.70178		Cluster14
1001	ARL3	88.1992	95.9523	5	-0.70943		Cluster2
1002	EIF3K	88.1874	88.5296	2	0.291061
1003	LEF1	88.1756	90.3351	2	0.164442		Cluster34
1004	DOCK4	88.1638	77.2186	1	2.04693		Cluster40
1005	RPS9	88.152	96.4008	5	-0.773355		Cluster14
1006	RFX1	88.1402	81.1777	1	1.46794
1007	TCF7L2	88.1284	94.2058	5	-0.542536
1008	HAUS2	88.1166	84.6826	3	0.31778
1009	TGFBR1	88.1048	92.0581	2	0.026496
1010	PCBP2	88.093	91.3382	10	-0.486593		Cluster26
1011	CCND1	88.0812	94.8844	5	-0.609559		Cluster8
1012	HNRNPA1	88.0694	97.5454	4	-0.848514		Cluster21
1013	SENP3	88.0576	82.9596	3	0.481731
1014	DCAF13	88.0458	73.2063	2	1.659		Cluster22
1015	MCL1	88.034	95.7871	3	-0.446619		Cluster13
1016	POLR2C	88.0222	94.7191	9	-0.795542		Cluster26
1017	AHR	88.0104	85.4142	3	0.267942
1018	KPNA2	87.9986	77.4605	2	1.22503		Cluster30
1019	SH3GL2	87.9868	96.5424	6	-0.901665		Cluster19
1020	ATF6	87.9691	76.6167	2	1.29128
1021	WRN	87.9691	77.2835	3	0.984875
1022	RPS8	87.9514	94.9375	5	-0.627938		Cluster14
1023	RPL5	87.9396	95.8815	4	-0.616073		Cluster14
1024	HNRNPH2	87.9278	69.7309	2	2.13054
1025	NOC4L	87.916	79.2129	2	1.033
1026	HNRNPA0	87.9042	90.3115	9	-0.388878		Cluster26
1027	ITGA4	87.8865	80.8237	1	1.47023
1028	DCC	87.8865	92.6245	1	0.412018		Cluster25
1029	PACS1	87.8688	68.7987	2	2.27254		Cluster42
1030	GHR	87.857	76.2922	2	1.31077
1031	S100A4	87.8452	89.9811	3	0
1032	AIMP1	87.8334	97.8051	3	-0.758489		Cluster21
1033	ARNT	87.8157	92.5891	4	-0.310398
1034	EXOC5	87.8157	84.4819	2	0.517934
1035	CEP76	87.798	84.1102	3	0.318654
1036	UTP20	87.7862	73.46	1	2.72248	CLIP	Cluster22
1037	TBP	87.7744	96.861	6	-1.01425		Cluster33
1038	MED8	87.7626	88.093	7	-0.147673
1039	KHDRBS1	87.7508	88.9781	2	0.206926
1040	TAF5	87.7272	80.7883	2	0.883895
1041	TXNL4A	87.7272	89.8218	9	-0.357591		Cluster26
1042	CENPP	87.7272	95.8402	5	-0.771165		Cluster18
1043	SNRPD3	87.7036	94.3474	10	-0.843964		Cluster26
1044	UBIAD1	87.6918	89.9339	2	0.14406
1045	PSMB8	87.68	89.6979	3	0
1046	SUPT16H	87.6682	74.5988	1	2.30953		Cluster33
1047	DNM1	87.6564	86.7536	1	0.84524
1048	NEO1	87.6387	82.0392	1	1.27836		Cluster5
1049	ADAM15	87.6387	79.5964	1	1.57484		Cluster20
1050	ALPL	87.621	91.0668	2	0.0546929
1051	HDAC11	87.6092	92.8723	5	-0.477261
1052	FBXW5	87.5974	81.5553	3	0.554784
1053	EIF2S1	87.5856	95.085	4	-0.602113		Cluster14
1054	TONSL	87.5738	65.0814	3	2.31719
1055	EXOC6	87.562	83.4435	2	0.57802
1056	RGS3	87.5502	87.5738	1	0.776097
1057	PLD2	87.5384	91.5034	1	0.443736
1058	GAS6	87.5266	78.1921	2	1.07141
1059	RNF8	87.5148	78.1685	2	1.07169		Cluster13
1060	DVL2	87.5029	86.7005	2	0.329202
1061	MAP4K4	87.4911	68.8695	2	2.11787	CLIP	Cluster17
1062	SPC24	87.4793	94.548	5	-0.673037
1063	CALD1	87.4675	90.4295	4	-0.186224
1064	SHC2	87.4557	88.1048	3	0.0478083
1065	FBXO31	87.4439	75.2183	2	1.32738
1066	OCLN	87.4321	89.3911	2	0.145002
1067	UBAP2	87.4203	91.4267	1	0.435978
1068	PDPK1	87.4085	83.0422	1	1.11985
1069	PSMD9	87.3967	83.054	3	0.384653
1070	RRAS	87.3849	96.1765	3	-0.592771		Cluster25
1071	TDRD3	87.3731	81.8976	1	1.24497		Cluster41
1072	YWHAG	87.3613	97.097	7	-1.25975		Cluster27
1073	BCL2L1	87.3495	90.996	1	0.465463
1074	EXOC3	87.3377	83.1544	2	0.58158		Cluster17
1075	NELFB	87.3259	77.012	1	1.84289
1076	NCAM1	87.3141	97.6044	5	-1.20448		Cluster11
1077	MAP3K1	87.3023	74.1267	1	2.24293	CLIP	Cluster25
1078	AGMAT	87.2846	86.081	3	0.144948
1079	JAG2	87.2846	81.1423	3	0.554578
1080	PSMA7	87.2669	87.8806	4	-0.000143224
1081	RYR2	87.2551	79.03	2	0.948885
1082	GATA2	87.2433	85.8095	1	0.839997
1083	SMO	87.2315	79.443	1	1.49277		Cluster42
1084	RPS23	87.2197	95.5275	5	-0.831331		Cluster14
1085	SAP30	87.2079	96.9436	6	-1.1928		Cluster34
1086	RPL36	87.1961	92.1997	4	-0.395691		Cluster14
1087	AIMP2	87.1843	93.8813	2	-0.154725		Cluster21
1088	TBL3	87.1725	73.637	2	1.42642
1089	GRIP1	87.1607	80.033	1	1.41893		Cluster44
1090	POLR2D	87.1489	94.0288	9	-0.900323		Cluster26
1091	SNRPA1	87.1371	91.291	9	-0.613782		Cluster26
1092	CDT1	87.1253	83.3786	4	0.177939
1093	HIST4H4	87.1135	94.1291	1	0.171267
1094	NRP2	87.1017	86.3347	2	0.289842		Cluster1
1095	DNM1L	87.0899	89.5563	2	0.0926052		Cluster6
1096	MTMR12	87.0781	99.7345	0	1.24341		Cluster43
1097	CTBP2	87.0663	91.1376	3	-0.178801
1098	SHOC2	87.0545	85.426	1	0.837435
1099	CACNG8	87.0427	79.7616	2	0.846631
1100	CCNE1	87.0309	78.5697	1	1.52531		Cluster8
1101	STAU1	87.0191	80.4461	2	0.792815		Cluster40
1102	CLIC1	87.0073	93.0729	2	-0.11563
1103	PPP4R4	86.9955	81.8563	1	1.16711
1104	CENPH	86.9837	95.8402	5	-0.934311		Cluster18
1105	CTCF	86.9719	68.9934	2	1.93761		Cluster44
1106	PPP1R10	86.9601	81.8563	1	1.16257
1107	CDC37	86.9483	83.3255	3	0.273369
1108	EIF4EBP3	86.9365	86.1341	4	0		Cluster14
1109	RPS7	86.9188	96.8846	6	-1.32029		Cluster14
1110	RHOA	86.9188	91.9047	2	-0.0510122		Cluster17
1111	STAT2	86.9011	84.7239	4	0.0346834
1112	STAM2	86.8893	89.9221	3	-0.107946
1113	TGS1	86.8775	73.1473	2	1.40339
1114	RPL6	86.8657	93.7338	4	-0.595403		Cluster14
1115	MAPK8IP2	86.8539	75.5015	1	1.87645		Cluster42
1116	AP5Z1	86.8421	79.5374	4	0.48126
1117	RPL35A	86.8303	92.6127	4	-0.491649		Cluster14
1118	HSPB1	86.8185	70.5452	2	1.71069
1119	PHC2	86.8067	81.6734	1	1.15409
1120	SMC2	86.7949	70.1794	2	1.74791		Cluster22
1121	NRP1	86.7831	94.43	3	-0.514238		Cluster1
1122	RNF2	86.7713	95.3977	5	-0.924554		Cluster32
1123	TRIM33	86.7595	89.7333	1	0.4775
1124	IRAK2	86.7477	77.9443	2	0.960176
1125	USF1	86.7359	83.7798	4	0.100636
1126	INSIG1	86.7241	96.0231	3	-0.701766		Cluster23
1127	TEC	86.7123	84.777	1	0.821822
1128	DTX1	86.7005	74.2743	1	2.01368
1129	MAPK7	86.6887	74.7286	1	1.95106
1130	RPL27	86.6769	92.0404	4	-0.465974		Cluster14
1131	MSH6	86.6651	71.7607	1	2.54044	CLIP	Cluster35
1132	SBF2	86.6533	95.5747	0	2.01529		Cluster12
1133	WASL	86.6356	97.215	1	-0.0804249		Cluster25
1134	CAMK2G	86.6356	89.574	2	0.0204976
1135	CEP152	86.6179	84.3403	3	0.144633
1136	MFAP1	86.6061	76.5872	5	0.585076		Cluster26
1137	CSNK1E	86.5884	90.282	4	-0.314007
1138	GTF3C5	86.5884	69.194	3	1.47093
1139	LMOD1	86.5707	77.4428	2	0.974657
1140	MYBBP1A	86.5589	72.6929	1	2.2026
1141	RFC1	86.5471	77.6139	1	1.55693		Cluster35
1142	RNGTT	86.5353	70.9641	3	1.29036
1143	HDAC10	86.5235	93.1437	5	-0.708095
1144	SLC7A5	86.5117	87.2197	1	0.634685
1145	ACTN2	86.4999	98.6665	6	-4.75758		Cluster24
1146	RAD17	86.4881	76.776	1	1.6555
1147	ANAPC7	86.4763	85.603	3	0.072864
1148	RBM5	86.4645	90.7246	9	-0.67703		Cluster26
1149	CDON	86.4527	94.9847	4	-0.789719		Cluster38
1150	SKA1	86.4409	98.0057	8	-2.47132		Cluster18
1151	EPN1	86.4291	83.7503	2	0.37534
1152	UBASH3B	86.4173	76.953	1	1.62485
1153	CHEK1	86.4055	93.8518	2	-0.271948		Cluster35
1154	SFI1	86.3937	84.6354	3	0.117943
1155	KLC1	86.3819	92.6658	1	0.191005		Cluster2
1156	CENPC	86.3701	95.1735	6	-1.07008		Cluster18
1157	EIF3H	86.3583	88.742	2	0.0637219
1158	SRSF9	86.3465	89.4973	9	-0.552938		Cluster26
1159	GNA14	86.3347	81.9212	1	1.06299		Cluster42
1160	CENPK	86.3229	96.0762	5	-1.10337		Cluster18
1161	TNKS1BP1	86.3111	67.1348	2	2.01145	CLIP	Cluster23
1162	RPLP0	86.2993	92.5655	4	-0.565205		Cluster14
1163	RBM14	86.2875	78.4163	3	0.619316
1164	DIS3L	86.2757	65.7895	2	2.20216		Cluster10
1165	AMFR	86.2639	81.0243	1	1.14824
1166	EPB41	86.2521	80.3576	1	1.22531		Cluster42
1167	RPL35	86.2403	93.3443	4	-0.665484		Cluster14
1168	CWC22	86.2285	64.3262	5	1.60239
1169	SYK	86.2167	98.2889	5	-2.10428		Cluster25
1170	LMNB1	86.2049	78.6878	2	0.797015
1171	MED19	86.1931	87.5089	7	-0.34086
1172	ING5	86.1813	83.4789	4	0.0505295		Cluster34
1173	FBN1	86.1695	79.1244	1	1.28853		Cluster39
1174	BCL2	86.1577	94.1822	2	-0.381086
1175	ABHD16A	86.1459	93.0729	2	-0.252597
1176	LZTS1	86.1341	71.8964	3	1.12083		Cluster33
1177	INS-IGF2	86.1223	99.7168	14	NA		Cluster14
1178	TNC	86.1105	78.1036	1	1.39668
1179	SRSF11	86.0928	94.6011	9	-1.30235		Cluster26
1180	ELN	86.0928	78.1803	1	1.38865		Cluster39
1181	NSL1	86.0751	96.2119	5	-1.28329		Cluster18
1182	FANCC	86.0633	80.9417	1	1.10019		Cluster45
1183	GTF3C2	86.0515	69.194	3	1.35381		Cluster33
1184	ADARB1	86.0397	86.6474	1	0.585388		Cluster30
1185	PPP2R5C	86.0219	82.818	1	0.903924
1186	ADRM1	86.0219	80.4343	2	0.635063
1187	DYNC1I1	86.0042	71.9731	2	1.36542
1188	ITGA1	85.9924	94.3828	3	-0.677471
1189	RPLP2	85.9806	92.0817	4	-0.612722
1190	RND1	85.9688	94.7191	5	-1.02424		Cluster1
1191	RPA3	85.957	90.9606	4	-0.493227		Cluster35
1192	DACT1	85.9452	90.9724	0	2.90712	CLIP	Cluster30
1193	CDH1	85.9334	99.6224	11	NA		Cluster38
1194	TCF3	85.9216	78.971	3	0.504498
1195	RPL37	85.9098	92.6835	4	-0.692796		Cluster14
1196	NME2	85.8921	92.7189	1	0.122419
1197	SYNE2	85.8921	68.5745	1	3.21399	CLIP	Cluster13
1198	IKBKB	85.8744	92.9844	1	0.0961456
1199	UBE2I	85.8626	95.085	2	-0.503862		Cluster13
1200	PRKAR2A	85.8508	87.8098	3	-0.105251		Cluster27
1201	SSNA1	85.839	88.7302	4	-0.310834		Cluster27
1202	CS	85.8272	86.73	2	0.0977229		Cluster6
1203	FANCA	85.8154	84.6531	1	0.661132		Cluster4
1204	TAF9	85.7977	92.9549	6	-0.930446		Cluster32
1205	FDPS	85.7977	87.4498	1	0.50472
1206	NELL2	85.78	77.2363	1	1.42132		Cluster45
1207	ANAPC10	85.7682	83.9745	2	0.236397
1208	OPTN	85.7564	83.3373	1	0.787563		Cluster3
1209	EPHA3	85.7446	91.6568	1	0.165726		Cluster25
1210	MYL9	85.7328	71.1529	2	1.38664
1211	IRF7	85.721	83.1544	4	0.00536447
1212	NFYB	85.7092	99.1031	2	-1.22541		Cluster23
1213	KAT7	85.6974	82.9832	1	0.828102
1214	SCRIB	85.6856	69.6601	1	2.54769	CLIP	Cluster20
1215	ESR1	85.6738	99.4572	18	NA		Cluster33
1216	ZBTB17	85.662	77.7968	1	1.33583
1217	CEP41	85.6502	84.1102	3	0.0172234
1218	HIRA	85.6384	72.4569	1	1.97357
1219	TERF1	85.6266	88.0576	5	-0.408868		Cluster13
1220	PNKP	85.6148	89.6271	2	-0.0573319
1221	PTPRF	85.603	70.0732	1	2.39085	CLIP&RNA	Cluster36
1222	BAHD1	85.5912	74.7876	1	1.62921
1223	IGF2BP1	85.5794	78.9828	1	1.19279	CLIP	Cluster26
1224	CDKN1B	85.5676	94.8548	3	-0.803934		Cluster8
1225	RALA	85.5558	96.1647	3	-0.984733		Cluster17
1226	PSMA5	85.544	89.8749	4	-0.465647
1227	OCRL	85.5263	71.7961	1	2.04494		Cluster7
1228	POLE3	85.5263	84.7888	2	0.152444
1229	RBM22	85.5086	68.8459	5	1.00692		Cluster26
1230	SYNE3	85.4968	79.6436	2	0.603029		Cluster13
1231	NAP1L4	85.485	88.8364	1	0.338062
1232	ABI2	85.4732	74.3333	2	1.01907
1233	RICTOR	85.4614	80.4697	1	1.03778		Cluster29
1234	MAP3K7	85.4496	88.4411	1	0.358271
1235	PINK1	85.4378	71.6604	1	2.03776
1236	CXCR4	85.426	91.2792	3	-0.465074
1237	ARRB2	85.4142	91.35	2	-0.238087		Cluster5
1238	MED29	85.4024	88.3408	7	-0.581824
1239	DIS3	85.3906	73.7904	2	1.07401		Cluster10
1240	CBX5	85.3788	96.9082	3	-1.18656		Cluster34
1241	SCN2A	85.367	78.735	1	1.18101		Cluster12
1242	SMURF2	85.3552	78.0564	1	1.2459
1243	BMPR2	85.3434	85.9629	1	0.516165
1244	TSC1	85.3316	79.7321	2	0.572341
1245	HUWE1	85.3198	66.7276	1	3.97702	CLIP	Cluster34
1246	NFE2L2	85.308	74.4395	1	1.5972
1247	EXOSC6	85.2962	79.9504	3	0.328114		Cluster10
1248	NUP50	85.2844	85.485	7	-0.386242		Cluster18
1249	SKP1	85.2726	95.4272	6	-1.59771		Cluster8
1250	NCAPG	85.2608	72.9703	1	1.78013		Cluster22
1251	USP47	85.249	69.6955	1	2.29895	CLIP	Cluster8
1252	CLSTN1	85.2372	78.1567	1	1.21872
1253	CHCHD3	85.2254	98.5603	1	-0.532213		Cluster34
1254	BAX	85.2077	86.494	1	0.469016
1255	DMAP1	85.2077	83.9273	2	0.166742
1256	ETS1	85.19	82.228	1	0.820744
1257	MYD88	85.1782	84.6708	1	0.571277
1258	MAVS	85.1664	83.9037	2	0.169593
1259	LEPR	85.1546	68.2794	3	1.25128
1260	PDCD4	85.1428	80.5641	2	0.485238
1261	RPS6KA4	85.131	73.8671	3	0.785928
1262	ALK	85.1192	72.3153	2	1.16599
1263	E2F6	85.1074	86.2639	3	-0.108588
1264	TCF19	85.0956	86.3878	1	0.458891		Cluster15
1265	HEATR1	85.0838	70.9228	1	2.05021	CLIP	Cluster22
1266	DOK1	85.072	80.0035	2	0.518877
1267	KLHL13	85.0602	70.38	1	2.10724
1268	UTP6	85.0484	81.1659	2	0.415459
1269	EXOSC9	85.0307	76.7878	2	0.771714		Cluster10
1270	CBLB	85.0307	91.055	1	0.127195
1271	TES	85.013	69.7663	1	2.19082
1272	STARD9	85.0012	89.4265	1	0.229944		Cluster2
1273	AGL	84.9894	78.0564	1	1.1834		Cluster45
1274	NCALD	84.9776	87.143	8	-0.57596		Cluster19
1275	HNRNPD	84.9658	93.6099	10	-1.61309		Cluster26
1276	TELO2	84.954	66.8279	2	1.63679
1277	CDC25B	84.9422	78.8648	1	1.08491
1278	TFDP1	84.9304	92.1053	3	-0.664978
1279	PSMB2	84.9186	88.2405	4	-0.437063
1280	RAN	84.9068	92.3531	10	-1.39563		Cluster18
1281	STUB1	84.895	88.8128	1	0.251447		Cluster44
1282	CRNKL1	84.8832	73.5662	5	0.541698		Cluster26
1283	LAMA2	84.8714	66.0078	1	3.55625
1284	FEZ1	84.8596	76.6403	1	1.29199
1285	TSG101	84.8478	83.0068	1	0.685895
1286	SRSF5	84.836	91.4798	9	-1.16741		Cluster26
1287	CCNC	84.8242	89.2023	7	-0.773059
1288	EIF3L	84.8124	75.708	1	1.36035
1289	PMS2	84.7947	67.0522	1	2.70391
1290	AKT2	84.7947	95.3033	2	-0.747178		Cluster3
1291	MEF2A	84.777	86.7831	1	0.383251
1292	SNRPF	84.7652	94.1468	10	-2.01373		Cluster26
1293	LSS	84.7534	84.5055	1	0.514665
1294	DHX37	84.7416	73.4482	1	1.59329
1295	PSMB7	84.7298	85.1192	3	-0.0978132
1296	ELP2	84.718	73.1178	2	1.00281
1297	KCNJ12	84.7062	85.9629	1	0.419763		Cluster11
1298	RPL30	84.6944	94.8076	4	-1.24866		Cluster14
1299	INSIG2	84.6826	91.5978	2	-0.394363
1300	RBM15	84.6708	78.0387	1	1.12726
1301	RPL9	84.659	93.7574	4	-1.06309		Cluster14
1302	ABI1	84.6472	81.7265	2	0.29675
1303	DLL4	84.6354	77.1654	3	0.466934
1304	EZH1	84.6236	86.1518	1	0.392921
1305	APLF	84.6118	74.764	3	0.617284
1306	GTF2H3	84.6	84.4937	3	-0.0934976
1307	TRIM39	84.5882	86.3701	1	0.367332
1308	FGFR3	84.5764	67.3236	1	2.43446	CLIP	Cluster25
1309	FYCO1	84.5645	77.3484	1	1.16602		Cluster14
1310	ATIC	84.5528	66.1907	1	2.82656		Cluster42
1311	DCLRE1C	84.5409	78.5933	2	0.523162
1312	MAN2C1	84.5291	89.3321	1	0.165232
1313	SAP130	84.5173	72.0911	1	1.70718		Cluster32
1314	ODC1	84.4996	67.9136	1	2.30649	CLIP	Cluster27
1315	GABBR1	84.4996	88.4234	2	-0.145368
1316	RELN	84.4819	74.2979	1	1.4192
1317	GAB1	84.4701	81.6025	2	0.273833
1318	SRSF2	84.4583	91.9401	9	-1.40426		Cluster26
1319	HABP4	84.4465	76.3158	1	1.23964
1320	SNRPG	84.4347	93.9816	10	-2.39918		Cluster26
1321	TMED3	84.4229	85.0779	7	-0.494782		Cluster19
1322	MYBL2	84.4111	67.7602	2	1.42444
1323	RPL37A	84.3993	92.4534	4	-0.961087		Cluster14
1324	ADAR	84.3875	92.0227	0	1.90641	CLIP	Cluster30
1325	DNAJC8	84.3757	88.3939	9	-0.865586		Cluster26
1326	DXO	84.3639	82.11	2	0.218775
1327	RPL23	84.3521	93.486	4	-1.10059		Cluster14
1328	E2F3	84.3403	85.5322	1	0.386844
1329	PTH1R	84.3285	74.8466	2	0.796655
1330	AFAP1L1	84.3167	79.6318	2	0.429277
1331	TTL	84.3049	77.7968	1	1.0841
1332	CACNA1H	84.2931	67.1702	1	2.38496	CLIP	Cluster11
1333	DHCR7	84.2813	87.3613	1	0.276423
1334	HMGCS1	84.2695	83.2075	1	0.573146	RNA	Cluster23
1335	RBM10	84.2577	69.2235	1	2.02813		Cluster26
1336	CNOT8	84.2459	79.4666	3	0.216794		Cluster23
1337	MED6	84.2341	90.4059	8	-1.11582		Cluster31
1338	FZD2	84.2223	66.4857	2	1.50264		Cluster43
1339	MED4	84.2046	88.4588	7	-0.826136		Cluster31
1340	VASP	84.2046	93.5214	2	-0.655045
1341	DYNC2H1	84.1869	61.8303	2	2.11853		Cluster27
1342	SENP1	84.1751	76.3748	2	0.659853		Cluster18
1343	PSMD12	84.1633	88.3526	4	-0.582736
1344	CNOT1	84.1515	64.987	1	3.40374	CLIP	Cluster23
1345	CKAP2	84.1397	68.9521	1	2.04509	CLIP	Cluster27
1346	EIF3J	84.1279	88.801	2	-0.219112
1347	RPS15A	84.1161	95.1617	5	-1.94969		Cluster14
1348	TPM2	84.1043	86.848	2	-0.0808044
1349	FARP2	84.0925	75.8674	2	0.69376		Cluster1
1350	WDR75	84.0807	81.3193	2	0.250175
1351	WDHD1	84.0689	62.0132	2	2.08473		Cluster35
1352	SUZ12	84.0571	89.8218	1	0.0890983
1353	CGN	84.0453	77.2186	1	1.11422
1354	NDN	84.0335	82.877	2	0.133721
1355	HNRNPA2B1	84.0217	91.3264	9	-1.42859		Cluster26
1356	CACNB1	84.0099	74.3805	2	0.787026
1357	SF3B6	83.9981	90.1463	9	-1.19588		Cluster26
1358	NUP35	83.9863	84.9599	7	-0.563014		Cluster18
1359	GAPDH	83.9745	81.0361	2	0.262288	RNA	Cluster25
1360	RPS29	83.9627	95.3505	5	-2.26327		Cluster14
1361	C3orf58	83.9509	85.0779	7	-0.576647		Cluster19
1362	LGALS1	83.9391	91.0432	0	1.93383
1363	NUAK1	83.9273	73.8022	1	1.39351		Cluster42
1364	EXOSC5	83.9155	72.2976	2	0.962044
1365	EPC1	83.8978	79.8088	2	0.354583
1366	EZH2	83.8978	93.663	1	-0.153903
1367	TAF2	83.8801	73.3774	1	1.41616
1368	PSMD10	83.8683	87.7685	3	-0.420153
1369	AP1G2	83.8565	89.7805	9	-1.17379		Cluster19
1370	LAS1L	83.8447	81.5022	3	0.0141618
1371	PIAS3	83.8329	71.6073	3	0.766823
1372	DDX24	83.8211	65.1758	1	2.81427	CLIP	Cluster37
1373	AGO1	83.8093	87.5915	2	-0.15553
1374	ARL2	83.7975	78.1449	1	0.974695
1375	RPLP1	83.7857	92.0404	4	-1.06447		Cluster14
1376	IFNAR1	83.7739	77.4428	3	0.313378
1377	PPP3CA	83.7621	85.9452	1	0.279805
1378	PTPRS	83.7503	88.6181	0	2.30947	CLIP	Cluster36
1379	FAU	83.7385	95.3151	5	-2.81895		Cluster14
1380	SKA2	83.7267	93.9993	5	-1.80266
1381	FIG4	83.7149	67.1997	1	2.12088		Cluster5
1382	RPS10	83.7031	95.0673	5	-2.33997		Cluster14
1383	MEAF6	83.6913	89.6861	6	-1.02078		Cluster32
1384	PRL	83.6795	81.8032	3	0
1385	SGIP1	83.6677	89.9693	9	-1.29163		Cluster19
1386	COPZ1	83.6559	85.0779	7	-0.647845		Cluster19
1387	ANAPC11	83.6441	87.5502	2	-0.186613
1388	STARD13	83.6323	89.2259	0	2.13046
1389	GJA1	83.6205	93.1083	1	-0.154895		Cluster5
1390	FGFR2	83.6087	85.8095	0	3.13651		Cluster42
1391	AKAP6	83.5969	64.6684	1	2.88901	CLIP	Cluster11
1392	JUNB	83.5851	75.7494	1	1.13256
1393	PLAU	83.5733	88.9072	2	-0.312299
1394	MAP1S	83.5615	64.8513	1	2.76028		Cluster43
1395	PPP2R4	83.5497	98.1473	7	NA		Cluster11
1396	RNMT	83.5379	77.5962	1	0.983954
1397	SNRPB2	83.5261	88.3939	9	-1.06225		Cluster26
1398	PLRG1	83.5143	66.4739	5	0.865761		Cluster26
1399	CABLES1	83.5025	63.6653	1	3.40043
1400	TLK2	83.4907	73.7314	1	1.31111
1401	EPHA5	83.4789	86.494	1	0.214998
1402	PTTG1	83.4671	87.5915	3	-0.451402		Cluster8
1403	TM7SF2	83.4553	87.4498	1	0.173651
1404	MAGED1	83.4435	65.046	1	2.59019	CLIP	Cluster25
1405	LAMC1	83.4317	69.0288	1	1.82774	CLIP	Cluster39
1406	XRCC1	83.4199	81.1305	2	0.181114
1407	NOL6	83.4081	74.0736	1	1.24689
1408	PTPN6	83.3963	95.0201	4	-1.93985
1409	RFC4	83.3845	82.3342	1	0.532435		Cluster35
1410	DTNA	83.3727	92.2351	1	-0.135552
1411	KIF25	83.3609	99.2683	4	NA		Cluster2
1412	RPS6KA6	83.3491	73.8671	3	0.51095
1413	RPL7A	83.3373	92.8487	4	-1.37036		Cluster14
1414	PACSIN1	83.3255	77.8499	1	0.917832
1415	PHF5A	83.3137	89.3439	9	-1.29639		Cluster26
1416	TJP1	83.3019	87.0958	0	2.45231	CLIP	Cluster25
1417	WNT5A	83.2901	81.9566	2	0.110409
1418	TBKBP1	83.2783	83.8211	1	0.344707
1419	MLLT1	83.2665	75.0649	1	1.12306
1420	POLR3GL	83.2547	71.8964	3	0.639565
1421	NCAPH	83.2429	63.0399	1	3.29176		Cluster22
1422	CTNNBIP1	83.2311	91.8102	3	-0.973563
1423	POLR1C	83.2193	82.4699	5	-0.329763
1424	FZD8	83.2075	72.7165	1	1.32035
1425	ACTG1	83.1957	73.3066	1	1.2634		Cluster3
1426	CDH24	83.1839	92.7897	1	-0.220067
1427	PNPLA2	83.1721	74.5398	1	1.14164
1428	U2AF1	83.1603	91.527	9	-2.10681		Cluster26
1429	NUP54	83.1485	84.9599	7	-0.756083		Cluster18
1430	CDH18	83.1367	92.7897	1	-0.230668
1431	LAMB2	83.1249	63.3939	1	2.87261	CLIP	Cluster39
1432	IRF2BPL	83.1131	68.4742	1	1.78182	CLIP	Cluster10
1433	SPTBN5	83.1013	98.7786	4	NA		Cluster12
1434	TAF12	83.0894	82.523	2	0.00472539
1435	EIF4E3	83.0776	85.4378	3	-0.401326
1436	POLR3D	83.0658	73.9438	3	0.444778
1437	SDCCAG8	83.054	84.1102	3	-0.303367
1438	UBE2S	83.0422	81.7914	2	0.0728199
1439	ATG3	83.0304	83.2665	1	0.368774
1440	POLR2F	83.0186	96.3182	13	NA		Cluster33
1441	GTF3C4	83.0068	64.5386	2	1.47281	CLIP	Cluster33
1442	OFD1	82.995	86.9247	4	-0.690728
1443	CSN1S1	82.9773	97.5336	6	NA		Cluster29
1444	MED22	82.9773	87.9632	7	-1.06883
1445	RET	82.9596	90.6361	3	-0.892661		Cluster25
1446	FAF1	82.9478	74.2329	1	1.13211		Cluster43
1447	RPL31	82.936	92.1466	4	-1.42813		Cluster14
1448	MAP3K10	82.9242	73.9084	1	1.17087
1449	FRS3	82.9124	77.8263	2	0.354102
1450	BANF1	82.9006	92.2941	6	-2.06396		Cluster18
1451	SRSF7	82.8888	89.0489	9	-1.41568		Cluster26
1452	FZR1	82.877	83.5025	2	-0.0272411
1453	FHL2	82.8652	86.0101	2	-0.225103
1454	POU2F1	82.8534	81.0951	4	-0.145046
1455	TNK2	82.8416	83.1249	1	0.363568
1456	INO80C	82.8298	84.5764	3	-0.38321
1457	RBM28	82.818	90.9842	2	-0.672857		Cluster37
1458	MAD2L2	82.8062	87.6564	1	0.0710865
1459	MYL6	82.7944	91.1966	3	-0.996337		Cluster24
1460	VAC14	82.7826	67.1997	1	1.85169		Cluster5
1461	EFNA2	82.7708	75.6077	1	0.996013
1462	PLCG2	82.759	87.1725	0	2.18875
1463	KLF5	82.7472	71.2532	3	0.620322
1464	WDR3	82.7354	69.2589	1	1.61835		Cluster22
1465	ADCY7	82.7236	61.9424	1	3.32882		Cluster43
1466	KDM5B	82.7118	63.8777	1	2.43477	CLIP	Cluster34
1467	HCK	82.7	97.7696	5	NA		Cluster25
1468	TADA2B	82.6882	69.3592	1	1.59459
1469	ACLY	82.6764	85.6856	0	2.41881	CLIP	Cluster23
1470	GNB2L1	82.6646	97.7401	5	NA		Cluster20
1471	MBD1	82.6528	81.9566	1	0.462057
1472	CNTN2	82.6351	89.102	0	1.86619		Cluster1
1473	SRCAP	82.6351	56.4255	2	2.41164
1474	MEF2D	82.6174	82.169	3	-0.143423
1475	CHD7	82.6056	63.2169	1	2.58169	CLIP	Cluster16
1476	SMARCAL1	82.5938	65.6479	1	2.04551		Cluster35
1477	ERCC4	82.582	73.4718	2	0.636741
1478	RPL12	82.5702	92.8369	4	-1.68688		Cluster14
1479	RTN4R	82.5584	64.1256	1	2.29997
1480	BIN1	82.5466	77.7083	2	0.316779
1481	PRKAR1B	82.5348	74.4749	1	1.05589
1482	PSMD5	82.523	82.7708	3	-0.216099
1483	UTP15	82.5053	78.4281	2	0.244715
1484	RFXANK	82.5053	78.0859	1	0.766605
1485	CDH15	82.4876	98.3243	4	NA		Cluster38
1486	KIRREL	82.4758	97.1324	6	NA		Cluster20
1487	GFRA1	82.464	85.5735	2	-0.247452
1488	CSNK2B	82.4522	91.6863	2	-0.797287		Cluster23
1489	APEX1	82.4404	73.578	3	0.404322		Cluster4
1490	PSMB10	82.4286	83.4258	3	-0.298177
1491	PFKP	82.4168	67.7307	1	1.71896
1492	UNC5A	82.405	73.2948	1	1.14854
1493	MAGI1	82.3932	71.6309	2	0.765555		Cluster42
1494	EEF1E1	82.3814	93.6453	2	-1.03467		Cluster21
1495	TMED7	82.3696	85.0779	7	-0.891718		Cluster19
1496	FGF2	82.3578	91.645	2	-0.821283		Cluster5
1497	RPL15	82.346	92.2469	4	-1.67267
1498	RAD23B	82.3342	83.2429	3	-0.300604
1499	MUC1	82.3224	88.1166	4	-0.910462
1500	RING1	82.3106	85.7564	2	-0.297331
1501	KLHL12	82.2988	76.3394	1	0.879993		Cluster8
1502	SNIP1	82.287	67.477	4	0.693219
1503	IGF1	82.2752	96.4834	7	NA		Cluster25
1504	ITGA3	82.2634	87.4085	1	0.0065104
1505	SRSF1	82.2516	90.76	9	-2.58682		Cluster26
1506	TNS1	82.2398	68.7397	1	1.5596
1507	RPL38	82.228	92.2587	4	-1.72614		Cluster14
1508	ARNTL	82.2162	68.8105	1	1.54525
1509	POLR1B	82.2044	65.2348	1	2.00919		Cluster33
1510	MED21	82.1926	90.0519	7	-1.74316		Cluster31
1511	IGHMBP2	82.1808	60.6207	2	1.6841
1512	HLA-DRB5	82.169	95.7222	9	NA		Cluster19
1513	AKT1S1	82.1572	80.2455	2	0.0987134
1514	SSR3	82.1454	89.2849	1	-0.0814318
1515	INTS10	82.1336	60.4791	2	1.69139
1516	SCN8A	82.1218	70.5806	1	1.35567		Cluster43
1517	SOX4	82.11	74.9233	2	0.45022		Cluster38
1518	CBFA2T3	82.0982	71.1529	1	1.2892
1519	MED31	82.0864	86.9365	6	-1.08002
1520	E2F5	82.0746	75.4189	2	0.414441
1521	MAST4	82.0628	65.6007	1	1.9112		Cluster29
1522	SDC2	82.051	90.5122	1	-0.195257		Cluster5
1523	GIT2	82.0392	82.3814	1	0.320722
1524	SRSF3	82.0274	89.8041	9	-2.11863		Cluster26
1525	BCS1L	82.0156	88.4411	1	-0.0250177
1526	BMI1	82.0038	84.6236	2	-0.2598
1527	ERBB3	81.992	93.427	2	-1.08582
1528	DEPTOR	81.9802	82.936	2	-0.0928688		Cluster29
1529	CNOT10	81.9684	66.3795	2	1.10973		Cluster23
1530	SUPT4H1	81.9566	76.0149	1	0.853282
1531	CCND3	81.9448	73.8907	1	1.02007		Cluster4
1532	SRSF6	81.933	89.6389	9	-2.05708		Cluster26
1533	TOP1	81.9212	74.05	1	0.998358		Cluster41
1534	VHL	81.9094	93.0021	3	-1.57435		Cluster8
1535	RPL22	81.8976	92.3413	4	-1.94335
1536	KIAA0368	81.8858	62.3436	1	2.45035	CLIP	Cluster9
1537	EXOSC7	81.874	73.6016	2	0.537674
1538	PFKL	81.8622	67.7307	1	1.59285
1539	NUDT21	81.8504	88.7125	9	-1.73737		Cluster26
1540	FASN	81.8386	82.7236	0	3.21501	CLIP&RNA	Cluster23
1541	CDC45	81.8268	80.1038	3	-0.0662871		Cluster35
1542	FMO1	81.815	87.2197	1	0
1543	SERPING1	81.8032	63.3113	1	2.19517
1544	EFNA5	81.7914	93.5922	2	-1.18419
1545	CYCS	81.7796	90.524	1	-0.233469
1546	SOCS1	81.7619	90.2997	2	-0.787115
1547	CDC7	81.7619	83.5497	4	-0.593088		Cluster35
1548	FLT3	81.7442	70.203	1	1.32856
1549	SLC12A2	81.7265	72.6575	1	1.08525
1550	YEATS2	81.7265	72.8405	1	1.07178		Cluster32
1551	UPF3A	81.7088	90.8898	4	-1.55239
1552	CBX6	81.697	83.5851	1	0.174827
1553	BMPR1B	81.6852	77.189	1	0.735982
1554	CEP70	81.6734	84.1102	3	-0.51213
1555	PSMA6	81.6616	88.1284	3	-0.84937
1556	CEP72	81.6498	84.1102	3	-0.515147
1557	MLH1	81.638	81.6852	1	0.33338		Cluster4
1558	BCL9	81.6262	67.6363	1	1.54616		Cluster45
1559	AIFM1	81.6144	79.6908	1	0.509004
1560	IRF3	81.5966	82.7	4	-0.498997
1561	PABPN1	81.5966	89.4029	9	-2.37065		Cluster26
1562	BCL2L13	81.5789	77.3484	1	0.700701		Cluster14
1563	CACNB3	81.5671	74.3805	2	0.421649
1564	CDC6	81.5553	87.9986	3	-0.858183		Cluster35
1565	DICER1	81.5376	83.7149	0	2.36408	CLIP	Cluster30
1566	KLHL7	81.5376	68.3148	1	1.45213		Cluster8
1567	KMT2D	81.5199	59.9599	1	2.82288	CLIP	Cluster32
1568	CDH10	81.5081	92.7897	1	-0.475349
1569	SMC4	81.4963	66.7453	1	1.6186		Cluster22
1570	ANGPT1	81.4845	80.747	2	0
1571	THBS2	81.4727	76.9235	1	0.720391
1572	DNAJC16	81.4609	86.081	3	-0.715257
1573	E2F4	81.4432	87.562	2	-0.544158
1574	SEMA7A	81.4432	60.4673	1	2.59136
1575	MAF	81.4255	68.9049	2	0.835624
1576	POLR3H	81.4137	72.988	4	0.176133
1577	ANAPC4	81.4019	84.5645	2	-0.356926
1578	KLHL20	81.3901	70.9877	1	1.19252
1579	SEMA6A	81.3783	71.1352	2	0.649323		Cluster1
1580	PGR	81.3665	89.1669	5	-1.58157
1581	ORC5	81.3547	81.3075	3	-0.248826		Cluster35
1582	MAP2K7	81.3429	83.9627	1	0.0934891
1583	RAP1A	81.3311	88.1402	1	-0.101406
1584	TCERG1	81.3193	66.9106	2	0.951625
1585	ID2	81.3075	76.8232	1	0.701014
1586	CUL4A	81.2957	77.9089	1	0.603958
1587	FER	81.2839	87.8334	3	-0.888398
1588	WWOX	81.2721	78.9238	1	0.514595
1589	MLLT4	81.2603	96.8846	4	NA		Cluster5
1590	VDR	81.2485	96.0526	5	NA		Cluster33
1591	XPC	81.2367	69.5185	1	1.2905
1592	CIB1	81.2249	66.6332	1	1.54807
1593	MVD	81.2131	81.5258	1	0.2825
1594	HIST1H3H	81.2013	80.4874	1	0.385479		Cluster44
1595	USP22	81.1895	69.3592	1	1.29118		Cluster32
1596	CHD9	81.1777	67.9018	1	1.41419		Cluster16
1597	GDNF	81.16	88.6476	2	-0.729445
1598	PNPT1	81.16	65.7895	2	1.01231
1599	CASC5	81.1423	95.8402	5	NA		Cluster18
1600	LRP6	81.1305	88.1756	0	1.60069	CLIP	Cluster38
1601	TPM1	81.1187	93.3561	2	-1.40476
1602	NOTCH4	81.1069	85.6974	2	-0.486547
1603	ATXN7L3	81.0951	69.3592	1	1.2709
1604	SGOL1	81.0833	95.6396	5	NA		Cluster18
1605	CFTR	81.0715	96.6368	4	NA		Cluster24
1606	ARHGDIB	81.0597	83.6677	0	2.15694
1607	CDH5	81.0479	97.6162	3	NA		Cluster38
1608	POLL	81.0361	71.029	2	0.600149
1609	MERTK	81.0243	65.2702	1	1.68308
1610	AGAP2	81.0125	65.5417	1	1.64772		Cluster42
1611	EIF6	81.0007	88.4824	0	1.54109		Cluster37
1612	MAP1LC3A	80.9889	90.1935	1	-0.334673
1613	SUPV3L1	80.9771	57.5525	1	3.53109	CLIP	Cluster10
1614	ORC2	80.9653	86.7123	5	-1.26916		Cluster35
1615	FBXL15	80.9535	75.2183	2	0.264434
1616	HNRNPA1L2	80.9417	83.8329	2	-0.374369		Cluster21
1617	SGOL2	80.9299	95.4921	5	NA		Cluster18
1618	AASDHPPT	80.9181	90.8308	1	-0.400596
1619	NLK	80.9063	82.1985	2	-0.184739
1620	TAF5L	80.8945	69.3592	1	1.24293
1621	PCGF1	80.8827	86.4173	2	-0.571225
1622	PLAUR	80.8709	89.8395	2	-0.898456
1623	TRPC4AP	80.8591	67.5301	1	1.39758		Cluster8
1624	HIST1H4B	80.8473	93.4034	1	-0.658739		Cluster34
1625	NUPL2	80.8355	84.5409	7	-1.2505		Cluster18
1626	KLHL22	80.8237	68.3148	1	1.31478
1627	CBX2	80.8119	80.9063	1	0.277688
1628	MED18	80.8001	87.9632	7	-1.98353
1629	TPM4	80.7824	87.7272	2	-0.699343
1630	WWTR1	80.7824	77.6611	1	0.548336		Cluster44
1631	PPP3CB	80.7647	83.4907	1	0.0677869
1632	ARID4A	80.7529	65.0106	2	1.03713
1633	PIN1	80.7411	89.2495	1	-0.276547
1634	FAS	80.7293	74.9941	1	0.734012
1635	ARHGAP35	80.7116	80.7175	0	3.46651	CLIP	Cluster25
1636	SETD1B	80.7116	60.3021	1	2.25669	CLIP	Cluster32
1637	SIRT2	80.6939	91.173	1	-0.463001
1638	AP4M1	80.6821	79.0123	4	-0.289674
1639	IDI1	80.6703	88.2818	1	-0.209765
1640	UBA2	80.6585	65.1286	1	1.62593		Cluster13
1641	TNF	80.6467	84.3521	1	0
1642	COPS2	80.6349	77.7319	3	-0.0470325
1643	PSMF1	80.6231	82.7708	3	-0.515894
1644	POT1	80.6113	75.1711	2	0.231282
1645	ANAPC16	80.5995	77.189	2	0.128663
1646	TRIM27	80.5877	72.4923	1	0.927494
1647	IKZF1	80.5759	68.067	2	0.754139
1648	DUSP6	80.5641	71.8079	1	0.981467
1649	MYH10	80.5523	58.0127	1	2.75767		Cluster3
1650	RASSF1	80.5405	83.5143	2	-0.388002
1651	PIK3R2	80.5287	94.843	5	NA		Cluster25
1652	ANAPC15	80.5169	76.3276	2	0.142863
1653	PRKCI	80.5051	88.919	2	-0.876602		Cluster38
1654	DCP2	80.4933	75.1593	2	0.204323
1655	EXOC6B	80.4756	71.8669	2	0.461353
1656	TAF10	80.4756	82.2752	2	-0.2554
1657	CTDNEP1	80.4579	82.9006	1	0.0845036
1658	DTL	80.4461	68.4919	1	1.23474
1659	MYO1A	80.4343	96.9672	3	NA		Cluster24
1660	A1BG	80.4225	70.085	1	1.10016
1661	ARVCF	80.4107	68.7869	1	1.20377		Cluster42
1662	DCPS	80.3989	59.9009	1	2.19678
1663	MEF2C	80.3871	86.6769	2	-0.690674
1664	MED10	80.3753	86.6297	6	-1.64146
1665	SRP68	80.3635	85.3611	0	1.74827		Cluster14
1666	TADA1	80.3517	69.3592	1	1.14166
1667	CD3D	80.3399	83.7798	1	0
1668	TOP2A	80.3281	57.1631	1	2.84215	CLIP	Cluster16
1669	GTF2E1	80.3163	70.911	1	1.00749
1670	USP10	80.3045	59.122	1	2.27783	CLIP	Cluster31
1671	NELFCD	80.2927	79.1362	1	0.34518
1672	PRMT5	80.2809	85.1782	0	1.74049
1673	RTCB	80.2632	58.4789	1	2.40658		Cluster22
1674	CUL4B	80.2632	66.0963	1	1.40817		Cluster8
1675	FBXO2	80.2455	75.2183	2	0.178158
1676	RFWD2	80.2337	65.4	1	1.49391		Cluster45
1677	CPS1	80.2219	56.8209	1	2.9463	CLIP	Cluster25
1678	KIF2B	80.2101	94.2589	5	NA
1679	MYOF	80.1983	55.7706	1	3.81913	CLIP	Cluster25
1680	DNMT3B	80.1865	88.3644	1	-0.295445
1681	CDC14A	80.1747	74.4985	1	0.697389
1682	NXF1	80.1629	79.9268	4	-0.449261
1683	SORBS2	80.151	67.3	1	1.28096
1684	BACH2	80.1333	71.3949	1	0.941583		Cluster42
1685	FGR	80.1333	96.6486	3	NA		Cluster25
1686	HEY1	80.1156	67.949	1	1.22658
1687	KPNA1	80.0979	81.0833	1	0.184048
1688	MYRIP	80.0979	57.0923	1	2.70559
1689	ZIC2	80.0802	55.688	2	1.73977
1690	PAK3	80.0625	85.0012	2	-0.61226
1691	RCOR1	80.0625	81.2839	1	0.168939
1692	WASF1	80.0448	72.6752	1	0.827319
1693	APP	80.033	89.4147	1	-0.412309
1694	TARBP2	80.0212	77.4192	1	0.47096
1695	MECP2	80.0094	90.0637	1	-0.456595
1696	CXCL12	79.9976	88.0694	2	-0.873468
1697	WDR74	79.9858	82.0274	0	2.23759		Cluster37
1698	NOP56	79.974	77.8145	1	0.433205
1699	SNX6	79.9622	72.7519	2	0.31395
1700	AZI2	79.9504	75.3245	1	0.606595
1701	SLC9A3R1	79.9386	92.5537	1	-0.728332		Cluster12
1702	MACF1	79.9268	80.0035	0	3.02342	CLIP	Cluster13
1703	KSR1	79.915	79.0772	1	0.311068
1704	GLE1	79.9032	59.476	2	1.33442
1705	VMA21	79.8914	85.0779	7	-1.68227		Cluster19
1706	FXR2	79.8796	80.6231	0	2.66371	CLIP	Cluster30
1707	IFT57	79.8678	65.3528	1	1.42297		Cluster32
1708	HNF4A	79.856	94.8667	4	NA
1709	MVK	79.8442	86.848	1	-0.229031
1710	MYLK	79.8324	79.325	0	3.26093	CLIP	Cluster20
1711	ERC1	79.8206	64.456	1	1.52132		Cluster43
1712	CACNG6	79.8088	72.1619	2	0.341574
1713	TM4SF1	79.797	74.6637	3	0
1714	GP1BB	79.7852	59.8891	1	2.00943
1715	PMVK	79.7734	87.3613	1	-0.271271
1716	GATAD2B	79.7616	78.7881	2	-0.0617276
1717	CDC26	79.7498	84.4347	2	-0.645115
1718	E2F2	79.738	83.9863	1	-0.0651852
1719	COG4	79.7262	63.7597	1	1.56889		Cluster22
1720	HES1	79.7144	79.856	0	2.79233
1721	MYCN	79.7026	64.7864	1	1.45126
1722	ESPL1	79.6908	54.915	1	3.1017		Cluster4
1723	PIK3CG	79.679	94.3946	4	NA		Cluster25
1724	ESR2	79.6672	93.3089	5	NA
1725	MYOD1	79.6495	93.2971	5	NA
1726	GIPC1	79.6495	83.7975	1	-0.0595872		Cluster1
1727	EPHB3	79.6318	86.9837	0	1.41415
1728	MSH3	79.62	59.2282	1	2.03341		Cluster4
1729	PRKAR1A	79.6082	84.4583	2	-0.68148
1730	MYL1	79.5964	82.7944	1	0
1731	ING3	79.5846	84.6531	3	-0.990297
1732	TNPO1	79.5728	73.2712	1	0.687874
1733	CD4	79.561	93.4978	1	-0.912823
1734	NRIP1	79.5492	83.0068	0	1.85817	CLIP	Cluster34
1735	SAMM50	79.5374	91.1258	0	0.99726
1736	SEMA3E	79.5256	65.6951	1	1.30087		Cluster1
1737	REST	79.5138	60.7033	1	1.82165
1738	NHP2L1	79.502	90.9252	9	NA		Cluster26
1739	SIAH1	79.4902	91.3854	1	-0.737767
1740	PLD1	79.4784	83.6795	0	1.71517
1741	CLTA	79.4666	81.4314	4	-0.769835
1742	RAC2	79.4548	95.4685	3	NA		Cluster20
1743	DLGAP1	79.443	75.3835	1	0.504073
1744	ITPR2	79.4312	53.5402	1	3.39969
1745	PSAP	79.4194	75.4071	1	0.492375
1746	MAP2K2	79.4076	74.4277	1	0.560175
1747	IFNAR2	79.3958	73.4954	2	0.172622
1748	UTP18	79.384	62.6623	1	1.5958
1749	MNAT1	79.3722	86.4527	3	-1.2979
1750	BRCC3	79.3604	83.0894	2	-0.54666
1751	DCTN5	79.3486	69.6011	3	0.24039
1752	CHKA	79.3368	71.5247	1	0.785403
1753	PHKA2	79.325	61.2639	1	1.71183		Cluster22
1754	TNFAIP1	79.3132	70.8756	1	0.841844
1755	F2	79.3014	82.0982	1	0		Cluster42
1756	CDH9	79.2896	92.7897	1	-0.930966
1757	GTF2H1	79.2778	85.8508	3	-1.27948
1758	APOE	79.266	82.7472	2	-0.537584
1759	G3BP1	79.2542	83.5733	2	-0.666078
1760	EED	79.2424	82.8652	1	-0.0397349
1761	IL2	79.2306	91.9991	5	NA
1762	CCNH	79.2188	88.86	3	-2.07312
1763	USP11	79.207	54.4135	1	2.53945	CLIP	Cluster34
1764	CEP57	79.1952	85.2549	3	-1.21531
1765	C17orf49	79.1834	84.7062	3	-1.16163
1766	BUD31	79.1716	60.5263	3	0.828642		Cluster26
1767	PRKCE	79.1539	81.5907	0	1.96153		Cluster42
1768	MSN	79.1539	82.4876	0	1.81613
1769	AP1S2	79.1362	86.1223	5	-2.47389
1770	IGFBP3	79.1244	76.3866	1	0.366487
1771	TTF1	79.1126	53.0446	1	3.09551	CLIP	Cluster33
1772	ZMYND11	79.1008	65.1522	1	1.25613
1773	KLF11	79.089	74.2861	1	0.508664
1774	PSMC1	79.0772	87.6918	4	-2.48685
1775	EBF1	79.0654	78.8176	2	-0.191021		Cluster34
1776	GRIN2A	79.0477	81.0479	0	2.05722
1777	IL18	79.0477	79.5846	1	0.139019
1778	TAF1B	79.03	66.4267	1	1.12164
1779	MBD2	79.0182	80.3045	3	-0.561855
1780	XRN1	79.0064	76.1329	1	0.36114		Cluster10
1781	SH2B1	78.9946	75.8792	3	-0.201593
1782	CATSPERB	78.9828	72.1619	2	0.19094
1783	SOS2	78.971	85.8744	0	1.32629		Cluster5
1784	KLF4	78.9592	77.5077	3	-0.328455
1785	DCTN6	78.9474	69.6011	3	0.170612
1786	ZNF639	78.9356	73.7609	1	0.533935
1787	GATA1	78.9238	92.6481	4	NA
1788	S100B	78.912	89.515	2	-1.53927
1789	FGFR1	78.9002	87.4911	0	1.21378		Cluster5
1790	YBX3	78.8884	73.3656	1	0.554005
1791	TNKS2	78.8766	62.9219	1	1.43192	CLIP	Cluster13
1792	EIF3M	78.8648	75.708	1	0.371789		Cluster14
1793	GTPBP1	78.853	57.5525	1	1.97898	CLIP	Cluster10
1794	SEMA3C	78.8412	73.8258	1	0.519321		Cluster1
1795	FOXA1	78.8294	65.4827	1	1.18066
1796	INTS5	78.8176	53.3278	1	2.69911
1797	CAMK2B	78.8058	84.417	1	-0.267212
1798	BRIX1	78.794	84.8419	1	-0.300859		Cluster37
1799	WDR18	78.7822	73.7609	1	0.513486
1800	ARHGAP17	78.7704	73.0824	1	0.564165
1801	PACSIN2	78.7586	72.4097	1	0.612998
1802	CBX1	78.7468	89.8513	1	-0.734222
1803	UNC5B	78.7291	77.7791	1	0.211546
1804	PTPRD	78.7291	83.3019	1	-0.160836		Cluster5
1805	SH3GL3	78.7114	74.0972	1	0.474527
1806	ORC4	78.6996	81.7678	3	-0.807168		Cluster35
1807	PAX6	78.6878	89.7687	1	-0.731603
1808	RPL3L	78.676	92.2233	4	NA
1809	TRAPPC10	78.6641	58.3314	1	1.82952
1810	DUSP3	78.6523	65.7187	2	0.603887
1811	MYOZ1	78.6405	74.8761	2	0
1812	ACTA2	78.6287	68.7751	1	0.883264
1813	BCAN	78.6169	79.2778	0	2.20238
1814	VKORC1L1	78.6051	80.0861	3	-0.62779		Cluster36
1815	BECN1	78.5933	82.9478	0	1.59806
1816	EIF4A1	78.5815	90.9488	5	NA		Cluster14
1817	GGA1	78.5697	73.8907	2	0.0267223
1818	CALR	78.5579	82.9714	1	-0.150009		Cluster42
1819	IFIT1	78.5461	65.3056	1	1.14864
1820	SDC3	78.5343	79.1598	1	0.0984451		Cluster42
1821	EMD	78.5225	63.1697	1	1.35003
1822	ROCK1	78.5107	86.081	0	1.24304		Cluster3
1823	CD151	78.4989	83.1839	1	-0.179857
1824	CDH6	78.4871	83.5969	1	-0.230083	RNA	Cluster38
1825	NRAS	78.4753	86.8008	1	-0.485098
1826	IL2RB	78.4635	90.7069	5	NA
1827	LNPEP	78.4517	78.6641	1	0.120619
1828	EPHA7	78.4399	79.8678	0	2.07228	CLIP	Cluster25
1829	EIF5	78.4281	77.1005	2	-0.141408
1830	NME3	78.4163	90.6892	1	-0.88359
1831	CACNA1D	78.4045	75.1239	2	-0.0149098
1832	XRCC4	78.3927	81.1895	2	-0.517311
1833	PPP2R3A	78.3809	80.1392	0	2.02623	CLIP	Cluster36
1834	NEK6	78.3691	78.8884	0	2.18636
1835	SYT2	78.3573	69.8135	2	0.265156
1836	UBN1	78.3455	59.5882	1	1.61505
1837	MIF4GD	78.3337	64.4206	2	0.669237
1838	CACNA2D1	78.3219	72.1619	2	0.131347
1839	IRF8	78.3101	81.3665	1	-0.0327668
1840	ELL	78.2983	72.5867	1	0.527801
1841	CHD1L	78.2865	56.3488	2	1.23326
1842	HADHB	78.2747	58.4376	1	1.70909
1843	AP1S3	78.2629	78.2275	3	-0.505358
1844	FOXG1	78.2511	84.3049	1	-0.359751
1845	CNOT11	78.2393	66.3795	2	0.484218		Cluster23
1846	MCCC2	78.2275	59.6177	1	1.57295
1847	HERC2	78.2039	50.4897	1	3.39519	CLIP	Cluster13
1848	DDR1	78.2039	82.4404	0	1.58545	CLIP	Cluster15
1849	SETD2	78.2039	53.2098	1	2.33813	CLIP	Cluster32
1850	SETMAR	78.1803	74.764	2	-0.0150823
1851	BDNF	78.1685	88.9485	2	-1.75102
1852	LIG1	78.1567	62.6918	1	1.32027
1853	TGFBI	78.1449	83.8565	1	-0.32407
1854	NOC3L	78.1331	82.405	0	1.57642		Cluster37
1855	TINF2	78.1213	73.106	2	0.0134648
1856	DYNLL1	78.1095	79.3722	3	-0.6611
1857	UBE2D2	78.0977	86.2403	2	-1.22508
1858	DNAJC1	78.0859	84.8006	1	-0.424933
1859	STAG1	78.0741	52.5254	1	2.41034	CLIP	Cluster13
1860	KCNJ4	78.0623	76.068	0	2.89007
1861	DCTN4	78.0505	69.6011	3	0.0584596
1862	UBE4B	78.0387	56.101	1	1.93293	CLIP	Cluster9
1863	INTS7	78.0269	67.359	1	0.872278
1864	VAPA	78.0151	78.5461	2	-0.360298
1865	POLR3E	78.0033	72.8169	3	-0.132217
1866	SNX9	77.9915	63.8659	1	1.15802
1867	LRP2	77.9797	77.8853	0	2.20848	CLIP	Cluster5
1868	GPKOW	77.9679	49.8702	2	1.702
1869	ZFYVE9	77.9561	76.5754	0	2.54091		Cluster45
1870	AGPAT1	77.9443	85.7092	1	-0.530041
1871	AXL	77.9325	53.4222	1	2.13833	CLIP	Cluster25
1872	NTRK1	77.9148	81.2249	2	-0.642802
1873	SMURF1	77.9148	80.9063	0	1.72497
1874	NISCH	77.8971	78.1036	0	2.14057	RNA	Cluster3
1875	CDH13	77.8853	92.7897	1	-1.42061
1876	GRAP	77.8735	76.0916	1	0.19094
1877	RFC2	77.8617	82.6528	1	-0.24478		Cluster35
1878	GGPS1	77.8499	87.3613	1	-0.667055
1879	AKAP5	77.8381	71.4303	1	0.542078
1880	CACNA1E	77.8263	72.1619	2	0.0436259
1881	OLAH	77.8145	94.784	2	NA
1882	MAPKAP1	77.8027	60.603	1	1.37714
1883	FAT4	77.7909	49.2861	1	3.44255	CLIP
1884	SUFU	77.7791	77.6493	1	0.094424
1885	NPAS4	77.7614	63.984	1	1.11224
1886	POLR1D	77.7614	80.9535	4	-1.13477
1887	NR1D2	77.7437	81.2603	0	1.62494
1888	ARF6	77.7319	92.3236	1	-1.38207
1889	POLA2	77.7201	66.9578	1	0.844744
1890	COG2	77.7083	57.6823	1	1.63413
1891	VAV3	77.6965	78.6996	0	1.99581
1892	NR2F6	77.6847	78.9356	0	1.94284
1893	DYNC1LI2	77.6729	70.0142	2	0.156534
1894	SDAD1	77.6611	76.363	1	0.159562
1895	PPFIA4	77.6493	68.663	1	0.721406
1896	PHKA1	77.6375	61.2639	1	1.31682
1897	DCHS1	77.6257	49.2861	1	3.22429	CLIP
1898	BLK	77.6139	94.5362	2	NA
1899	AES	77.6021	74.6165	2	-0.0977581	RNA	Cluster34
1900	POLR2J	77.5844	67.9254	2	0.272919
1901	NANOG	77.5844	91.7571	3	NA
1902	ABCF2	77.5667	51.8232	1	2.29716
1903	NTRK2	77.5549	76.7347	1	0.13467		Cluster5
1904	LIG3	77.5431	61.5412	1	1.27445		Cluster4
1905	PES1	77.5313	81.4019	0	1.55589		Cluster37
1906	PIAS2	77.5195	85.8272	2	-1.43042
1907	IL6	77.5077	90.0873	4	NA
1908	PAXIP1	77.4959	68.9934	1	0.665965		Cluster32
1909	SUPT3H	77.4841	77.5195	3	-0.601801
1910	TRIM24	77.4723	81.2367	0	1.57645	CLIP	Cluster33
1911	KLF10	77.4605	48.7609	1	3.26325
1912	IQGAP2	77.4428	73.6488	0	4.42867	CLIP	Cluster20
1913	CACNG7	77.4428	77.6729	2	-0.366129
1914	EPC2	77.4251	59.0984	1	1.44138		Cluster32
1915	ITGA7	77.4133	69.967	1	0.586035
1916	KRR1	77.4015	74.7463	1	0.230764
1917	ZHX2	77.3897	81.992	0	1.46502
1918	ERCC8	77.3779	73.3302	1	0.323247
1919	FAF2	77.3602	75.0531	1	0.19505
1920	SRP72	77.3602	87.1607	0	0.966033		Cluster14
1921	RYBP	77.3425	79.4135	1	-0.0100809
1922	RUNX1T1	77.3307	83.6205	2	-1.08125
1923	TROVE2	77.3189	77.4723	1	0.0562481
1924	TERT	77.3071	84.0335	3	-1.80649		Cluster13
1925	UBE2E1	77.2953	86.2108	2	-1.54914		Cluster8
1926	LPL	77.2835	73.6901	1	0.28532
1927	PTGES3	77.2717	81.3547	2	-0.76461		Cluster40
1928	BLVRA	77.2599	60.4437	2	0.763411
1929	CAV3	77.2481	93.8813	2	NA
1930	PHB2	77.2363	70.0378	1	0.56274
1931	RHOBTB1	77.2245	78.6287	0	1.88425
1932	SHANK2	77.2126	66.4503	1	0.819103
1933	PTK6	77.2009	88.2936	5	NA
1934	BCAP31	77.189	73.4364	1	0.292016
1935	NR1I2	77.1772	70.6042	2	0.0798161
1936	VLDLR	77.1654	68.7515	1	0.642147
1937	DCAF5	77.1536	58.8978	1	1.41694
1938	XPO5	77.1418	48.7373	1	2.95019	CLIP	Cluster18
1939	RRP9	77.13	73.5898	2	-0.0822712
1940	TANK	77.1182	65.223	1	0.915715
1941	ETS2	77.1064	60.2667	2	0.755063
1942	UBAC1	77.0946	55.4048	1	1.75447
1943	RAB3GAP2	77.0828	57.9655	1	1.48881		Cluster6
1944	SCML2	77.071	80.9063	1	-0.182047
1945	SNAPC2	77.0533	64.22	1	0.994032
1946	MAP3K4	77.0533	79.0772	0	1.79191		Cluster42
1947	SYN1	77.0356	81.2485	0	1.4978
1948	PARK7	77.0238	79.974	1	-0.10108		Cluster42
1949	LIMK1	77.012	86.2285	0	0.975997		Cluster3
1950	SDC4	77.0002	84.8832	2	-1.44613		Cluster5
1951	OXSR1	76.9884	68.3561	1	0.647479
1952	SGCD	76.9766	72.628	1	0.318005
1953	MRE11A	76.9648	87.8924	5	NA		Cluster13
1954	MED25	76.953	58.6854	2	0.834188
1955	ARHGAP32	76.9412	80.747	0	1.53772	CLIP	Cluster25
1956	FLNB	76.9294	72.9172	0	3.54789	CLIP	Cluster25
1957	PCGF6	76.9176	87.916	1	-0.897678
1958	DCAF6	76.9058	58.8978	1	1.36683
1959	SHANK1	76.894	57.8888	1	1.44278
1960	LHX9	76.8822	81.6262	2	-0.868515
1961	IPO5	76.8704	48.5013	1	2.82539	CLIP	Cluster18
1962	IL2RA	76.8586	87.739	5	NA
1963	SORT1	76.8468	79.6082	1	-0.107243
1964	POLM	76.835	76.4928	2	-0.363552
1965	PYGO2	76.8232	63.2936	3	0.293951
1966	GOLGA2	76.8114	80.1215	0	1.5878		Cluster7
1967	WDR77	76.7996	83.2193	1	-0.474825
1968	HNF1A	76.7878	90.2171	3	NA
1969	ITGB2	76.7701	92.9844	2	NA
1970	NEDD4L	76.7701	75.9972	0	2.13219	CLIP	Cluster29
1971	KMT2E	76.7524	61.7064	1	1.12069
1972	KIF26A	76.7406	47.9054	1	2.97804	CLIP	Cluster27
1973	GCSAM	76.7288	97.7933	1	NA		Cluster15
1974	JUND	76.717	72.2799	1	0.317613
1975	NR1D1	76.7052	80.6113	0	1.4952
1976	NFATC1	76.6934	83.1957	0	1.16762
1977	PRKCQ	76.6757	72.7283	2	-0.111428
1978	HIF3A	76.6757	74.0146	3	-0.449072
1979	ITGA2B	76.658	87.0781	2	-2.46593
1980	ANK3	76.6462	74.6283	0	2.34515	CLIP	Cluster12
1981	BAIAP2	76.6226	86.4055	0	0.884738
1982	IRF1	76.6226	73.5308	1	0.197481
1983	IL27RA	76.6226	54.9799	1	1.64245
1984	MBD4	76.599	56.9861	1	1.45373
1985	TRIP10	76.5872	71.3477	1	0.360497
1986	SPRY2	76.5754	86.0101	0	0.903981
1987	CNOT4	76.5636	79.0123	2	-0.66368		Cluster23
1988	CRY1	76.5518	59.6826	1	1.22707
1989	SLC26A9	76.54	97.569	1	NA		Cluster15
1990	RORA	76.5282	81.2131	1	-0.300132
1991	TDG	76.5164	72.6752	1	0.243501
1992	CNOT3	76.5046	66.3795	2	0.225468		Cluster23
[truncated: 6,482 more rows]
