# Supplementary material for: Identification of FMR1-regulated molecular networks in human neurodevelopment
Source: HighWire-hosted journal article supplement (doi:10.1101/gr.251405.119), 2020-03-01
Supplement: Supplemental_Table_S5.xlsx [file Supplemental_Table_S5.xlsx]

## Sheet: S5A. Overlap of network cluster
Supplementary Table S5A. Overlap of identified network clusters from partially perturbed or random input genes to network clusters inferred from the original input gene sets.
Overlap is the average of Jaccard Index (JI) for all 45 clusters derived from test input set to the 45 clusters obtained from the original input set.
5-CV: 5 generated sets in which randomly selected 20% of original hits were hidden.
Input CLIP alone: Clusters inferred using only the CLIP-seq targets as the input set
Input RNA alone: Clusters inferred using only the RNA-seq targets as the input set
	Test Inputs		dNPC	vNPC	dneuron	vneuron
	5-CV	01	0.462498	0.47702	0.52207	0.516935
		02	0.541452	0.474428	0.564218	0.561169
		03	0.46353	0.397857	0.540285	0.593281
		04	0.513301	0.514379	0.605694	0.607735
		05	0.463556	0.387421	0.581014	0.552684
	Input CLIP alone		0.244546	0.245271	0.322733	0.353892
	Input RNA alone		0.21352	0.223475	0.155453	0.241878
	Random network	01	0.0470453	0.0487737	0.0466144	0.0444876
		02	0.0470502	0.0462771	0.0483822	0.0431952
		03	0.0423409	0.0449274	0.0455339	0.0461531
		04	0.0455685	0.044975	0.0463628	0.0464112
		05	0.0490015	0.0469419	0.0466944	0.0459281
		06	0.0429641	0.045664	0.0457393	0.0455755
		07	0.0482298	0.0491799	0.0444431	0.0456026
		08	0.047659	0.0465847	0.0456019	0.0459784
		09	0.0466721	0.046766	0.0438817	0.0436578
		10	0.0530775	0.0494573	0.0476162	0.0447864

## Sheet: S5B. Overlap of ranked genes
Supplementary Table S5B. Overlap of partial perturbed or random gene sets with genes prioritized highly by the network information flow analysis
Union of genes from 4 cell types: represents the union of input genes generated for a particular randomization experiment that are in the top 1% prioritized set.
A. All hits genes: 285 genes representing the the union set of all hit genes from 4 cell types, identified by our experiments and in the top 1% genes set.
B. Indirect prioritized genes: 65 genes representing the union set of highly ranked novel genes from 4 cell types, identified by network information flow-based prioritization and in the top 1% genes. This list excludes the 285 genes identified by CLIP and/or RNA-seq.
Statistical significance of overlap between gene sets from the original and random gene sets is obtained based on the hypergeometric test. # overlap: the number of genes overlapping, HGP: P-value, fold-enrich: The fraction of observed over expected. The entries in the HGP column are colored based on significance. We find significant overlap between our original and partially perturbed input set, …
	Partial / Random Gene sets		Union of genes from 4 cell types	A. Overlap with hit genes (CLIP & RNAseq) (285 genes)			B. Indirect prioritized genes (65 genes)
				# overlap	HGP	fold enrich	# overlap	HGP	fold enrich
	5-CV	01	306	56	5.57862e-29	6.01	8	0.00221955	3.41
		02	312	55	1.36735e-27	5.79	8	0.00250494	3.34
		03	310	56	1.12691e-28	5.93	8	0.00240677	3.36
		04	306	56	5.57862e-29	6.01	8	0.00221955	3.41
		05	307	56	6.65793e-29	5.99	8	0.00226524	3.4
	CLIP-alone		195	65	1.2206e-51	10.95	9	1.57908e-05	6.02
	RNA-seq alone		304	56	3.90793e-29	6.05	8	0.00213036	3.43
	Random sets	01	391	22	0.00393265	1.85	5	0.179865	1.67
		02	311	28	2.27399e-07	2.96	5	0.0895077	2.1
		03	393	31	9.31586e-07	2.59	5	0.182474	1.66
		04	372	28	8.0299e-06	2.47	5	0.15584	1.75
		05	386	31	6.30889e-07	2.64	5	0.173407	1.69
		06	333	26	9.00684e-06	2.56	6	0.0416699	2.35
		07	368	20	0.0085203	1.79	2	0.458991	1.41
		08	383	13	0.38368	1.11	3	0.568503	1.02
		09	367	18	0.0310238	1.61	3	0.539142	1.07
		10	391	25	0.000343795	2.1	6	0.078275	2

## Sheet: S5C. TFs enriched in DEGs
Supplementary Table S5C. List of candidate transcription factors (TF), whose target sets are enriched in DEGs from RNA-seq. Target genes of TFs are defined in transcriptional regulatory networks (TRN) constructed from multiple sources (See Methods).
DEGs identified from RNA-seq from each cell type are tested for enrichment for the target genes sets of TFs using FDR corrected hypergeometric test
FDR: Benjamini-Hochberg-corrected hypergeometric p-value (<0.05)
Transcriptional regulatory network source:
	(1) brain TRN: Transcriptional regulatory networks for human brain cells inferred using gene expression from the Allen Brain Atlas and ENCODE Dnase I data (Pearl et al., 2019, Cell Systems 8, 122-135.)
	(2) Acessible motif net: Accessible motif network based on Dnase-seq data from neural progenitor cells in the road map Epigenome project (Chasman et al., 2019, Cell Systems 9, 167–186)
	(3) NPC,NSC inferred net: Inferred neural lineage regulatory network from all NPC and NSC data (Chasman et al., 2019, Cell Systems 9, 167–186)
	(4) refined NSC inferred net: Inferred neural lineage and hindbrain specific regulatory network refined using NSC data collected in Chasman et al. (Chasman et al., 2019, Cell Systems 9, 167–186)
	dNPC				dNeuron				vNPC				vNeuron
	Source	TF	FDR		Source	TF	FDR		Source	TF	FDR		Source	TF	FDR
	NPC,NSC inferred net	POLR2J	2.50729e-43		brain TRN	DLX6	8.74629e-05		NPC,NSC inferred net	ZNHIT3	1.13723e-39		refined NSC inferred net	POU3F2	0.00245095
	NPC,NSC inferred net	ZNHIT3	2.50729e-43						NPC,NSC inferred net	POLR2J	3.56646e-35		refined NSC inferred net	STYX	0.00515286
	NPC,NSC inferred net	BANF1	7.97316e-42						NPC,NSC inferred net	BANF1	1.06948e-31		refined NSC inferred net	PTPN23	0.00515286
	NPC,NSC inferred net	BTF3	8.62538e-17						NPC,NSC inferred net	BTF3	9.40925e-22		refined NSC inferred net	LPPR1	0.00515286
	NPC,NSC inferred net	SUPT4H1	3.32585e-15						NPC,NSC inferred net	SUPT4H1	7.19912e-21		Acessible motif net	HERPUD1	0.00558049
	NPC,NSC inferred net	YWHAZ	7.66975e-14						NPC,NSC inferred net	POLR2I	4.4445e-13		refined NSC inferred net	SIRT2	0.00893696
	NPC,NSC inferred net	TCEB2	2.11795e-13						NPC,NSC inferred net	CTNNB1	1.12223e-12		Acessible motif net	DUXA	0.00927381
	NPC,NSC inferred net	CTNNB1	3.81808e-13						NPC,NSC inferred net	TCEB2	1.42839e-11		NPC,NSC inferred net	BTF3	0.0213183
	NPC,NSC inferred net	YWHAQ	1.84198e-11						NPC,NSC inferred net	YWHAQ	1.55706e-11
	NPC,NSC inferred net	HAND1	4.10016e-11						NPC,NSC inferred net	YWHAZ	1.12157e-10
	NPC,NSC inferred net	TRIM28	9.01569e-11						NPC,NSC inferred net	DDB1	1.65822e-10
	Acessible motif net	POU2F3	1.31708e-10						NPC,NSC inferred net	POLR2G	7.04859e-09
	Acessible motif net	POU3F4	1.61439e-10						NPC,NSC inferred net	PTRHD1	7.10818e-09
	Acessible motif net	POU2F1	1.61439e-10						NPC,NSC inferred net	GTF2A2	3.15709e-08
	Acessible motif net	POU3F3	6.12941e-10						NPC,NSC inferred net	POLR2H	1.6238e-07
	Acessible motif net	POU3F2	6.12941e-10						NPC,NSC inferred net	POLR2K	3.22158e-07
	Acessible motif net	POU3F1	7.6246e-10						brain TRN	ELK4	6.53534e-07
	Acessible motif net	JUNB	6.44765e-08						NPC,NSC inferred net	EDF1	1.62818e-06
	Acessible motif net	JUN	1.6095e-07						NPC,NSC inferred net	MAPK1	2.15021e-06
	Acessible motif net	JUND	1.73668e-07						NPC,NSC inferred net	TRIM28	2.84988e-06
	NPC,NSC inferred net	GTF2A2	1.98207e-07						NPC,NSC inferred net	HAND1	4.59382e-06
	NPC,NSC inferred net	POLR2I	6.76355e-07						NPC,NSC inferred net	PHF5A	5.05553e-06
	brain TRN	ELK4	7.84624e-07						NPC,NSC inferred net	MYT1L	2.08601e-05
	brain TRN	NFYB	7.84624e-07						NPC,NSC inferred net	PPFIA2	2.50857e-05
	Acessible motif net	POU5F1B	8.90698e-07						NPC,NSC inferred net	MYT1	3.9186e-05
	NPC,NSC inferred net	POLR2H	1.50986e-06						NPC,NSC inferred net	LCMT1	0.000300096
	NPC,NSC inferred net	POLR2L	2.67508e-06						NPC,NSC inferred net	SMPD3	0.00035252
	NPC,NSC inferred net	HIST1H1C	4.14034e-06						NPC,NSC inferred net	POLR2L	0.00035252
	NPC,NSC inferred net	IRF3	6.94255e-06						NPC,NSC inferred net	PQBP1	0.000389082
	NPC,NSC inferred net	PHF5A	8.0879e-06						Acessible motif net	JUNB	0.000672642
	NPC,NSC inferred net	PHPT1	1.18928e-05						Acessible motif net	JUND	0.000672642
	Acessible motif net	AL662833.4	1.19157e-05						Acessible motif net	JUN	0.000672642
	Acessible motif net	AL773544.1	1.19157e-05						NPC,NSC inferred net	DRAP1	0.00129711
	Acessible motif net	BX088580.2	1.19157e-05						brain TRN	GABPA	0.00136071
	Acessible motif net	CR388229.2	1.19157e-05						brain TRN	NFYB	0.00136071
	Acessible motif net	CR759815.4	1.19157e-05						NPC,NSC inferred net	PAK3	0.00141513
	Acessible motif net	CR847794.3	1.19157e-05						NPC,NSC inferred net	PHACTR3	0.00141513
	brain TRN	GABPA	1.38287e-05						brain TRN	SOX1	0.00163289
	Acessible motif net	POU2F2	1.41446e-05						NPC,NSC inferred net	C1D	0.00167263
	Acessible motif net	ETS1	1.61693e-05						NPC,NSC inferred net	PTPN11	0.00172449
	Acessible motif net	POU5F1	2.09853e-05						NPC,NSC inferred net	PTPRO	0.00180766
	Acessible motif net	NFY	2.1257e-05						refined NSC inferred net	ZFP42	0.00195312
	NPC,NSC inferred net	HIST1H2BN	2.23501e-05						Acessible motif net	POU3F1	0.00209252
	Acessible motif net	HOXD9	2.43003e-05						Acessible motif net	CREB5	0.00222194
	Acessible motif net	HOXC9	2.71175e-05						Acessible motif net	POU2F1	0.00222194
	NPC,NSC inferred net	HIST1H2BE	2.81253e-05						Acessible motif net	ATF7	0.00222194
	Acessible motif net	ETV6	2.88751e-05						Acessible motif net	POU2F3	0.00222194
	Acessible motif net	NKX2-8	2.88751e-05						Acessible motif net	ATF2	0.00234689
	NPC,NSC inferred net	STAT1	3.09731e-05						brain TRN	HSFY1	0.00247187
	Acessible motif net	NFYB	3.29655e-05						Acessible motif net	POU3F3	0.00344432
	Acessible motif net	ETV7	3.29655e-05						Acessible motif net	POU3F4	0.00344432
	Acessible motif net	FOSL1	3.84323e-05						Acessible motif net	POU3F2	0.00344432
	Acessible motif net	FOSB	4.63194e-05						NPC,NSC inferred net	DLG1	0.00445534
	Acessible motif net	FOSL2	4.63194e-05						brain TRN	ELF2	0.0056448
	Acessible motif net	NFYA	5.34726e-05						NPC,NSC inferred net	ZNF540	0.00633573
	Acessible motif net	HEY1	5.65871e-05						NPC,NSC inferred net	ZNRD1	0.00639223
	NPC,NSC inferred net	MAPK1	5.74761e-05						Acessible motif net	ETS1	0.00810548
	Acessible motif net	GATA3	5.944e-05						NPC,NSC inferred net	NONO	0.00850815
	Acessible motif net	HOXA9	5.944e-05						NPC,NSC inferred net	FLI1	0.00850815
	Acessible motif net	FOS	5.95757e-05						NPC,NSC inferred net	OAZ1	0.00899385
	Acessible motif net	BARX2	7.64399e-05						refined NSC inferred net	TRIM25	0.0093743
	Acessible motif net	ERF	7.79352e-05						Acessible motif net	ERF	0.0148151
	Acessible motif net	ENSG00000235187	8.26329e-05						Acessible motif net	NKX2-8	0.0148151
	brain TRN	ELF2	9.15451e-05						Acessible motif net	ETV3	0.0148151
	brain TRN	MXI1	9.15451e-05						Acessible motif net	ENSG00000235187	0.0148151
	NPC,NSC inferred net	ETV6	9.69791e-05						Acessible motif net	ELK3	0.0148151
	Acessible motif net	ETV3	0.000110203						Acessible motif net	ETV2	0.0148151
	Acessible motif net	GATA2	0.000110203						Acessible motif net	ETV4	0.0148151
	Acessible motif net	ELK3	0.000110203						Acessible motif net	ERG	0.0148151
	Acessible motif net	ETV2	0.000110203						Acessible motif net	FLI1	0.0148151
	Acessible motif net	ETV4	0.000110203						Acessible motif net	FEV	0.0148151
	Acessible motif net	GATA1	0.000110203						Acessible motif net	NKX2-4	0.0148151
	Acessible motif net	ERG	0.000110203						Acessible motif net	ELK1	0.0148151
	Acessible motif net	FLI1	0.000110203						Acessible motif net	ELK4	0.0148151
	Acessible motif net	FEV	0.000110203						Acessible motif net	ETS2	0.0148151
	Acessible motif net	JDP2	0.000110203						Acessible motif net	ETV1	0.0148151
	Acessible motif net	ELK1	0.000110203						Acessible motif net	ETV5	0.0148151
	Acessible motif net	NKX2-1	0.000110203						Acessible motif net	ATF3	0.015963
	Acessible motif net	ETV1	0.000110203						Acessible motif net	NKX2-2	0.015963
	Acessible motif net	ETV5	0.000110203						Acessible motif net	E4F1	0.015963
	NPC,NSC inferred net	ELF3	0.000110817						Acessible motif net	CREB3L2	0.015963
	Acessible motif net	ELK4	0.000118993						Acessible motif net	BATF3	0.015976
	Acessible motif net	GATA4	0.000119612						Acessible motif net	JDP2	0.0159955
	Acessible motif net	ETS2	0.000120263						NPC,NSC inferred net	DLX1	0.0162911
	Acessible motif net	NKX2-4	0.000139051						Acessible motif net	CREB3	0.0177157
	Acessible motif net	NKX2-2	0.000150586						Acessible motif net	HSF2	0.0204075
	Acessible motif net	NKX2-6	0.000186051						Acessible motif net	ETV7	0.0204075
	Acessible motif net	HOXB13	0.00018721						Acessible motif net	NKX2-3	0.0204075
	Acessible motif net	HLF	0.00018721						Acessible motif net	GABPA	0.0204075
	Acessible motif net	HOXC13	0.000193732						NPC,NSC inferred net	LHX6	0.0206124
	Acessible motif net	HOXD13	0.000200874						Acessible motif net	GMEB2	0.0206778
	Acessible motif net	GATA5	0.000210299						NPC,NSC inferred net	PHPT1	0.0212068
	Acessible motif net	IRF3	0.000210299						NPC,NSC inferred net	ETV4	0.0232035
	Acessible motif net	GMEB2	0.000210299						Acessible motif net	HSF4	0.0233
	Acessible motif net	GATA6	0.000217093						Acessible motif net	NKX2-1	0.0233
	Acessible motif net	HOXA13	0.000217093						Acessible motif net	AL662833.4	0.0233
	Acessible motif net	E2F4	0.000239782						Acessible motif net	AL773544.1	0.0233
	Acessible motif net	GABPA	0.000246735						Acessible motif net	BX088580.2	0.0233
	NPC,NSC inferred net	ATF2	0.00024769						Acessible motif net	CR388229.2	0.0233
	brain TRN	GTF2A2	0.000263382						Acessible motif net	CR759815.4	0.0233
	Acessible motif net	IRX5	0.000306534						Acessible motif net	CR847794.3	0.0233
	Acessible motif net	NKX2-3	0.000403392						Acessible motif net	NKX2-6	0.0247905
	Acessible motif net	BARX1	0.000433893						Acessible motif net	BARHL2	0.0247905
	NPC,NSC inferred net	CEBPZ	0.000452364						NPC,NSC inferred net	PDK1	0.0251163
	Acessible motif net	CREB3L1	0.000485189						refined NSC inferred net	ARNT2	0.0264721
	Acessible motif net	TBX19	0.000592677						refined NSC inferred net	POU3F2	0.0264721
	Acessible motif net	DUX4	0.000596114						refined NSC inferred net	TFE3	0.0264721
	Acessible motif net	CEBPZ	0.000693835						brain TRN	DBP	0.0265545
	Acessible motif net	FOXQ1	0.000711516						NPC,NSC inferred net	DCLK2	0.0271556
	Acessible motif net	FOXF1	0.000719921						NPC,NSC inferred net	ST18	0.0271556
	Acessible motif net	CREB3	0.000795187						Acessible motif net	HLF	0.0287563
	NPC,NSC inferred net	NFE2L2	0.000811033						Acessible motif net	BARHL1	0.0287563
	NPC,NSC inferred net	DIP2C	0.000811033						Acessible motif net	CREB3L1	0.0287563
	NPC,NSC inferred net	TOP2B	0.000899868						Acessible motif net	ETV6	0.0287563
	NPC,NSC inferred net	ETV7	0.0009887						Acessible motif net	AL662828.6	0.0287563
	NPC,NSC inferred net	EDF1	0.0009887						Acessible motif net	ATF6	0.0287563
	NPC,NSC inferred net	DDB1	0.00105628						Acessible motif net	ATF6B	0.0287563
	Acessible motif net	NKX2-5	0.00107896						Acessible motif net	CR753803.1	0.0287563
	Acessible motif net	CHD2	0.00108013						Acessible motif net	CR925796.2	0.0287563
	Acessible motif net	HES2	0.00108013						Acessible motif net	FERD3L	0.0287563
	Acessible motif net	HOXA7	0.00108773						Acessible motif net	POU5F1	0.0320053
	Acessible motif net	TAF1	0.00108773						Acessible motif net	ATF1	0.0320053
	Acessible motif net	GRHL1	0.00108773						Acessible motif net	CREB1	0.0320053
	Acessible motif net	ATF7	0.00108773						Acessible motif net	BATF	0.0320053
	Acessible motif net	FOXD4	0.00109508						Acessible motif net	CREM	0.0320053
	Acessible motif net	FOXD4L1	0.00114507						Acessible motif net	POU5F1B	0.0320053
	Acessible motif net	CREB5	0.00115933						brain TRN	FOXN2	0.0321473
	Acessible motif net	FOXC2	0.00116733						refined NSC inferred net	TTBK1	0.0321878
	Acessible motif net	ATF2	0.00124408						refined NSC inferred net	POU2F2	0.0321878
	Acessible motif net	RUNX1	0.00134684						refined NSC inferred net	ZNF25	0.0334606
	Acessible motif net	OBOX6	0.00134684						refined NSC inferred net	ERCC2	0.0334606
	Acessible motif net	IRX2	0.00134684						refined NSC inferred net	MITF	0.0334606
	NPC,NSC inferred net	HIST1H2BD	0.00137513						Acessible motif net	NKX2-5	0.0340152
	Acessible motif net	BATF	0.00139732						refined NSC inferred net	ZNF615	0.0360901
	Acessible motif net	IRX4	0.00139732						refined NSC inferred net	ALPL	0.0360901
	Acessible motif net	FOXE1	0.00139732						NPC,NSC inferred net	ATF7	0.0381661
	Acessible motif net	FOXE3	0.00139732						NPC,NSC inferred net	CHD4	0.0381661
	NPC,NSC inferred net	EHF	0.00141365						NPC,NSC inferred net	HHEX	0.0381661
	Acessible motif net	HOXA5	0.00145429						refined NSC inferred net	EHF	0.0389769
	Acessible motif net	FOXD4L2	0.00145429						NPC,NSC inferred net	TAF12	0.0393164
	Acessible motif net	FOXD4L3	0.00145429						NPC,NSC inferred net	MED6	0.0403188
	Acessible motif net	FOXD4L4	0.00145429						NPC,NSC inferred net	SET	0.0408479
	Acessible motif net	FOXD4L5	0.00145429						Acessible motif net	ESX1	0.0433434
	Acessible motif net	FOXD4L6	0.00145429						NPC,NSC inferred net	TBR1	0.0452537
	Acessible motif net	FOXF2	0.00145429						NPC,NSC inferred net	EPHA5	0.0452537
	Acessible motif net	CREB3L2	0.00146521						brain TRN	SOX2	0.045615
	Acessible motif net	FOXD1	0.00146521						NPC,NSC inferred net	NFE2L1	0.0467954
	Acessible motif net	FOXD2	0.00146521						NPC,NSC inferred net	ATF2	0.0467954
	Acessible motif net	FOXL2	0.00146521						Acessible motif net	GBX1	0.0470358
	Acessible motif net	FOXS1	0.00146521						Acessible motif net	CHD2	0.0470358
	Acessible motif net	FOXA2	0.00149181						refined NSC inferred net	DAXX	0.0480789
	Acessible motif net	FOXC1	0.00149852						brain TRN	ID2	0.0480855
	Acessible motif net	FOXD3	0.00150536						Acessible motif net	BARX1	0.0486153
	NPC,NSC inferred net	POLR2K	0.00165951						Acessible motif net	TAF1	0.0486153
	Acessible motif net	HOXC8	0.00167594						NPC,NSC inferred net	KALRN	0.0489449
	Acessible motif net	FOXK1	0.00169978						NPC,NSC inferred net	PTPMT1	0.0489449
	Acessible motif net	FOXJ2	0.00171598						NPC,NSC inferred net	ZBTB20	0.0489449
	Acessible motif net	FOXG1	0.00171598						NPC,NSC inferred net	DLX3	0.0495682
	Acessible motif net	CREB3L3	0.0019375
	Acessible motif net	CREB3L4	0.00196669
	Acessible motif net	POU1F1	0.00208512
	Acessible motif net	ELF4	0.00219694
	Acessible motif net	FOXB1	0.00219694
	Acessible motif net	FOXB2	0.00219694
	Acessible motif net	FOXI1	0.00239354
	Acessible motif net	ELF2	0.00239354
	Acessible motif net	KIAA0415	0.00239354
	Acessible motif net	BATF3	0.00239354
	Acessible motif net	FOXI2	0.00239354
	Acessible motif net	FOXA3	0.00239354
	Acessible motif net	FOXJ1	0.00239354
	Acessible motif net	FOXK2	0.00239354
	Acessible motif net	FOXL1	0.00239354
	Acessible motif net	ISL1	0.00246963
	Acessible motif net	E2F1	0.00249005
	Acessible motif net	HOXB9	0.00256262
	Acessible motif net	FOXA1	0.00258812
	Acessible motif net	FOXJ3	0.00258958
	NPC,NSC inferred net	PTRHD1	0.00281173
	Acessible motif net	ISL2	0.0029795
	NPC,NSC inferred net	RPA2	0.00299678
	NPC,NSC inferred net	HIST1H2BG	0.00300493
	Acessible motif net	PROX1	0.00312494
	Acessible motif net	HOXB5	0.00343465
	Acessible motif net	NANOG	0.00371623
	NPC,NSC inferred net	HIF1A	0.00373
	Acessible motif net	AC012531.1	0.00441485
	Acessible motif net	HOXB7	0.00441485
	Acessible motif net	T	0.00453508
	Acessible motif net	ZNF628	0.00465124
	Acessible motif net	ELF1	0.00476699
	Acessible motif net	PBX3	0.00478503
	Acessible motif net	ELF3	0.00481868
	NPC,NSC inferred net	SNRPD1	0.00505179
	Acessible motif net	HOXB4	0.00528242
	Acessible motif net	IRX3	0.0058503
	Acessible motif net	ETS	0.00595153
	Acessible motif net	HOXC5	0.00603239
	Acessible motif net	XBP1	0.00603239
	Acessible motif net	IRX1	0.00628705
	Acessible motif net	CREM	0.00628705
	Acessible motif net	ZBTB33	0.00628705
	Acessible motif net	AL662828.6	0.00628705
	Acessible motif net	ATF6	0.00628705
	Acessible motif net	ATF6B	0.00628705
	Acessible motif net	CR753803.1	0.00628705
	Acessible motif net	CR925796.2	0.00628705
	Acessible motif net	AL662830.5	0.00628705
	Acessible motif net	AL845464.3	0.00628705
	Acessible motif net	BX284686.1	0.00628705
	Acessible motif net	BX927239.6	0.00628705
	Acessible motif net	CR812478.2	0.00628705
	Acessible motif net	CR933878.8	0.00628705
	Acessible motif net	PBX2	0.00628705
	Acessible motif net	PBX4	0.00628705
	Acessible motif net	HES4	0.00630473
	Acessible motif net	PRRX2	0.0063658
	Acessible motif net	HOXC6	0.00643942
	Acessible motif net	IRX6	0.0064464
	NPC,NSC inferred net	ELF4	0.00659389
	Acessible motif net	ARNT	0.00661961
	Acessible motif net	RUNX2	0.00661961
	Acessible motif net	BRCA1	0.00671356
	Acessible motif net	UNCX	0.0067536
	Acessible motif net	ELF5	0.006796
	NPC,NSC inferred net	OAZ1	0.00690497
	brain TRN	POU2F2	0.00705491
	NPC,NSC inferred net	SIX6	0.00720451
	Acessible motif net	HOXD4	0.00733697
	NPC,NSC inferred net	ZNRD1	0.00759367
	NPC,NSC inferred net	ELF2	0.00759367
	refined NSC inferred net	SGSH	0.00766163
	refined NSC inferred net	ZNF420	0.00766163
	Acessible motif net	HOXD8	0.00790931
	Acessible motif net	HSF4	0.00790931
	Acessible motif net	ATF1	0.00790931
	Acessible motif net	CREB1	0.00790931
	Acessible motif net	HOXB8	0.0079596
	Acessible motif net	ENSG00000250096	0.00829192
	Acessible motif net	RUNX3	0.00829192
	Acessible motif net	HES1	0.00858761
	Acessible motif net	ARNT2	0.00879845
	Acessible motif net	HOXA6	0.0088273
	Acessible motif net	SPDEF	0.0088273
	Acessible motif net	ARNTL	0.0088273
	Acessible motif net	PBX1	0.0088273
	brain TRN	POU5F2	0.00898032
	brain TRN	CREB3L4	0.0092472
	NPC,NSC inferred net	ATF1	0.00975394
	NPC,NSC inferred net	PBX3	0.00975394
	NPC,NSC inferred net	HIST1H1B	0.00975394
	NPC,NSC inferred net	HIST1H2BH	0.00975394
	NPC,NSC inferred net	BARHL2	0.0101582
	brain TRN	RFXANK	0.0101753
	Acessible motif net	HEY2	0.0103417
	Acessible motif net	HEYL	0.0103417
	Acessible motif net	HOXB6	0.0106922
	Acessible motif net	E4F1	0.0106922
	Acessible motif net	NR3C1	0.0111022
	Acessible motif net	NR2C2	0.0119804
	brain TRN	E2F6	0.0129779
	refined NSC inferred net	DDIT3	0.0130065
	refined NSC inferred net	RFX2	0.0130065
	brain TRN	DBP	0.0132315
	Acessible motif net	HES5	0.0134487
	Acessible motif net	SRF	0.0134562
	Acessible motif net	EN1	0.0136733
	Acessible motif net	NANOGP1	0.0138806
	Acessible motif net	ZNF683	0.0139096
	NPC,NSC inferred net	ARNT2	0.013996
	Acessible motif net	ISX	0.0140175
	Acessible motif net	GBX1	0.0141036
	NPC,NSC inferred net	LHX6	0.0145976
	NPC,NSC inferred net	BOLA2	0.0146371
	NPC,NSC inferred net	SNRPB	0.0150504
	NPC,NSC inferred net	ATF5	0.0150673
	Acessible motif net	HOXA4	0.0150766
	refined NSC inferred net	FOSB	0.0155009
	Acessible motif net	BSX	0.0157463
	Acessible motif net	GBX2	0.0157463
	Acessible motif net	AC226150.2	0.0160081
	brain TRN	FOXN2	0.0169439
	brain TRN	IRF8	0.0169439
	brain TRN	SOX15	0.0169439
	Acessible motif net	SPI1	0.0169682
	brain TRN	DDIT3	0.0170801
	Acessible motif net	BPTF	0.0172644
	Acessible motif net	EN2	0.0178169
	Acessible motif net	HSF1	0.0179725
	Acessible motif net	PRDM16	0.0179725
	Acessible motif net	EHF	0.0182452
	Acessible motif net	ARX	0.019004
	NPC,NSC inferred net	NKX2-3	0.0190373
	NPC,NSC inferred net	HIST1H1E	0.0190373
	NPC,NSC inferred net	SBF2	0.0190373
	NPC,NSC inferred net	BARHL1	0.0191725
	brain TRN	POU2F1	0.0194137
	NPC,NSC inferred net	CREM	0.0201053
	NPC,NSC inferred net	ERF	0.0201053
	Acessible motif net	HSF2	0.0201567
	Acessible motif net	TP73	0.02034
	Acessible motif net	HMX1	0.0204177
	refined NSC inferred net	PTRF	0.0210813
	refined NSC inferred net	MTF1	0.0210813
	refined NSC inferred net	SLA2	0.0210813
	refined NSC inferred net	SP8	0.0210813
	NPC,NSC inferred net	NFYA	0.0211515
	NPC,NSC inferred net	HINFP	0.0211515
	NPC,NSC inferred net	ETS1	0.0214498
	NPC,NSC inferred net	PTTG1	0.0214498
	NPC,NSC inferred net	PAX7	0.0214498
	Acessible motif net	HNF4G	0.0216716
	Acessible motif net	ATF3	0.022907
	NPC,NSC inferred net	CREB5	0.0229195
	Acessible motif net	SHOX	0.0230426
	Acessible motif net	NR3C2	0.0233646
	Acessible motif net	PGR	0.0233646
	Acessible motif net	TBPL2	0.0237718
	Acessible motif net	AR	0.0244027
	Acessible motif net	MECOM	0.0246468
	NPC,NSC inferred net	NUDT5	0.0247616
	Acessible motif net	SHOX2	0.0248285
	NPC,NSC inferred net	FOXG1	0.0252483
	NPC,NSC inferred net	UBLCP1	0.0261416
	Acessible motif net	BARHL2	0.0274611
	Acessible motif net	SOX30	0.0275209
	Acessible motif net	IRF9	0.0286239
	Acessible motif net	NR4A1	0.0286851
	Acessible motif net	NR4A3	0.0286851
	Acessible motif net	TP53	0.028762
	NPC,NSC inferred net	TAF9	0.0294085
	brain TRN	HSFY1	0.0294689
	brain TRN	SOX5	0.0294689
	brain TRN	NR1H3	0.0294689
	brain TRN	POU6F2	0.0294689
	brain TRN	SOX1	0.0294689
	brain TRN	E2F1	0.0294689
	Acessible motif net	NR4A2	0.0300973
	brain TRN	IRF3	0.0303993
	Acessible motif net	SOX12	0.0305025
	NPC,NSC inferred net	ELF5	0.0315968
	Acessible motif net	BARHL1	0.0326483
	NPC,NSC inferred net	CHD4	0.0326653
	NPC,NSC inferred net	NFYB	0.0326653
	brain TRN	JUNB	0.0334769
	Acessible motif net	PAX6	0.0334994
	Acessible motif net	NFE2L2	0.0338399
	NPC,NSC inferred net	PBX2	0.0349291
	NPC,NSC inferred net	TLX2	0.0352712
	NPC,NSC inferred net	CDKN3	0.0354602
	brain TRN	CREBL2	0.0361742
	Acessible motif net	GMEB1	0.0363406
	NPC,NSC inferred net	RUNX1	0.0372046
	refined NSC inferred net	FOXD3	0.038037
	refined NSC inferred net	NFYA	0.038037
	NPC,NSC inferred net	SREBF2	0.0391249
	NPC,NSC inferred net	ISX	0.0391249
	Acessible motif net	NOBOX	0.0393588
	NPC,NSC inferred net	NR2C1	0.0394158
	NPC,NSC inferred net	LHX8	0.0394158
	NPC,NSC inferred net	POLR2F	0.0394158
	Acessible motif net	PPARD	0.0402915
	Acessible motif net	NR2C1	0.0410451
	Acessible motif net	HMX2	0.0420431
	NPC,NSC inferred net	ELK3	0.0430475
	NPC,NSC inferred net	SP100	0.0430475
	NPC,NSC inferred net	COPS5	0.0430475
	refined NSC inferred net	PAX2	0.0452932
	refined NSC inferred net	HIC1	0.0453221
	Acessible motif net	LIN54	0.0458245
	Acessible motif net	LHX9	0.0461002
	NPC,NSC inferred net	BARX2	0.0461528
	Acessible motif net	DUXA	0.0476224
	NPC,NSC inferred net	GLI2	0.0488801
	NPC,NSC inferred net	NTPCR	0.0488801
	refined NSC inferred net	PFKFB1	0.0494684
	refined NSC inferred net	ELF1	0.0494684
	refined NSC inferred net	ACVR1	0.0494684
