# Supplementary material for: Identification of FMR1-regulated molecular networks in human neurodevelopment
Source: HighWire-hosted journal article supplement (doi:10.1101/gr.251405.119), 2020-03-01
Supplement: Supplemental_Table_S6.xlsx [file Supplemental_Table_S6.xlsx]

## Sheet: S6A. SFARI, IQ
Supplmental Table S6A. Full list of enriched SFARI- and IQ-related genes in each of the cell type specific CLIP targets and the gene set derived from network-based diffusion. Related to Fig. 6A
Tested for enrichment of SFARI and IQ related gene set using FDR corrected hypergeometric test
FDR: Benjamini-Hochberg-corrected hypergeometric p-value, p<0.05 cases are highlighted.
Overlapped genes are genes that contribute to enrichment
	DB	Set name	cell type	FDR	Number of overlap	Overlapped genes
	SFARI	CLIP alone	dNPC	1.21486e-19	165	ACTN4;ADCY3;ADNP;AFF2;AGAP1;AHDC1;AKAP9;ANK2;ANK3;ANKRD11;APC;ARHGAP32;ARID1B;ASH1L;ASPM;ATRX;BIRC6;BRCA2;CACNA1H;CAMSAP2;CAPRIN1;CASK;CCDC88C;CCT4;CDC42BPB;CECR2;CHD2;CHD7;CHD8;CIC;CLASP1;CPT2;CREBBP;CTCF;CTNNB1;CTNND2;CUL3;CUL7;CYFIP1;DIP2C;DMXL2;DOCK1;DST;DYNC1H1;EHMT1;EML1;EP300;EP400;EPC2;EPHB2;EPPK1;ERBIN;FAT1;FBN1;FGD1;GNAS;GRIP1;GSN;GTF2I;HCFC1;HDAC3;HDAC6;HECTD4;HECW2;HERC2;HNRNPU;HUWE1;…
	SFARI	CLIP alone	dNeuron	2.83007e-14	95	ADNP;AFF4;AGAP1;AGAP2;AHDC1;ANK2;ANK3;APC;AR;ARHGAP32;ARID1B;ASH1L;ASPM;ASXL3;BIRC6;CACNA1H;CAMSAP2;CCDC88C;CCT4;CDC42BPB;CIC;CLASP1;CREBBP;CTNNB1;CTNND2;CUL7;CYFIP1;DIP2C;DOCK1;DYNC1H1;EP300;EP400;EPC2;ERBIN;FAT1;HCFC1;HECTD4;HERC2;HUWE1;IRF2BPL;KAT6A;KDM4B;KDM5B;KDM5C;KMT2A;LRBA;LRPPRC;MAGED1;MAP2;MCM4;MED13;MED13L;MIB1;MTOR;MYO5A;NACC1;NBEA;NCKAP1;NF1;NIPBL;NSD1;NUAK1;NUP133;OCRL;PER1;PHF3;PLX…
	SFARI	CLIP alone	vNPC	8.4665e-17	158	ACTN4;ADNP;AFF2;AHDC1;AKAP9;ANK2;ANK3;ANKRD11;APC;ARID1B;ATRX;BIRC6;BRD4;CACNA1H;CADPS2;CAMSAP2;CAPRIN1;CCDC88C;CCT4;CDC42BPB;CECR2;CHD7;CHD8;CIC;CLASP1;CPT2;CREBBP;CTCF;CTNNB1;CTNND2;CUL3;CUL7;CYFIP1;DDX3X;DIP2C;DMXL2;DOCK1;DOCK4;DST;DYNC1H1;EHMT1;EP300;EP400;EPHB2;ERBB4;ERBIN;EXT1;FAT1;FBN1;FGD1;GNAS;GPD2;GSN;GTF2I;HCFC1;HDAC6;HECTD4;HERC2;HUWE1;IQGAP3;IRF2BPL;JARID2;JMJD1C;KAT6A;KDM4B;KDM5B;KD…
	SFARI	CLIP alone	vNeuron	2.12764e-16	109	ADNP;AFF2;AFF4;AGAP1;AHDC1;ANK2;ANK3;APC;ARHGAP32;ARID1B;ARNT2;ASPM;BIRC6;CACNA1H;CADPS2;CAMSAP2;CCDC88C;CCT4;CDC42BPB;CHD7;CHD8;CLASP1;CREBBP;CTNNB1;CTNND2;CUL7;CYFIP1;DDX3X;DGKK;DIP2C;DOCK1;DOCK10;DYNC1H1;EML1;EP300;EP400;EPHB2;ERBB4;FAT1;HCFC1;HDAC6;HECTD4;HERC2;HUWE1;IRF2BPL;KAT6A;KDM4B;KDM5B;KDM5C;KIF5C;KMT2A;LRP2;LRPPRC;MAGED1;MAP2;MCM4;MED12;MED13;MED13L;MIB1;MTOR;MYO16;MYO5A;NAV2;NBEA;NCK…
	SFARI	CLIP+RNA+Top5%	dNPC	9.52735e-15	206	ACTN4;ADCY3;ADNP;AFF2;AGAP1;AHDC1;AKAP9;ANK2;ANK3;ANKRD11;APC;AR;ARHGAP32;ARID1B;ASH1L;ASPM;ATRX;BIRC6;BRAF;BRCA2;C12orf57;CACNA1H;CAMSAP2;CAPRIN1;CASK;CCDC88C;CCT4;CD44;CDC42BPB;CECR2;CHD2;CHD7;CHD8;CIC;CLASP1;CNR1;CPT2;CREBBP;CTCF;CTNNB1;CTNND2;CUL3;CUL7;CYFIP1;DIP2C;DMXL2;DNER;DOCK1;DST;DYNC1H1;EHMT1;EIF4E;EML1;EP300;EP400;EPC2;EPHB2;EPPK1;ERBIN;ESR1;FAT1;FBN1;FGD1;FMR1;GNAS;GPX1;GRIP1;GSK3B;G…
	SFARI	CLIP+RNA+Top5%	dNeuron	3.3917e-18	142	ABCA7;ADARB1;ADCY5;ADNP;AFF4;AGAP1;AGAP2;AHDC1;ANK2;ANK3;APC;AR;ARHGAP32;ARID1B;ASH1L;ASPM;ASXL3;BIRC6;C3orf58;CACNA1H;CAMSAP2;CASK;CCDC88C;CCT4;CDC42BPB;CDKN1B;CIC;CLASP1;CNOT3;CNTN4;CREBBP;CTNNB1;CTNND2;CUL3;CUL7;CYFIP1;DIP2C;DLG1;DNM1L;DOCK1;DRD2;DRD3;DYNC1H1;EP300;EP400;EPC2;ERBIN;ESR1;EXT1;FAT1;FLT1;GNA14;GNAS;HCFC1;HDAC3;HECTD4;HERC2;HLA-DRB1;HUWE1;IRF2BPL;KAT2B;KAT6A;KCNJ12;KDM4B;KDM5B;KDM…
	SFARI	CLIP+RNA+Top5%	vNPC	1.09459e-16	207	ACTN4;ADNP;AFF2;AHDC1;AKAP9;ANK2;ANK3;ANKRD11;APC;AR;ARID1B;ARX;ATP1A3;ATRX;BIRC6;BRD4;C12orf57;CACNA1H;CADPS2;CAMSAP2;CAPRIN1;CCDC88C;CCT4;CD44;CDC42BPB;CECR2;CHD7;CHD8;CIC;CLASP1;CNTN6;CPT2;CREBBP;CSNK1D;CTCF;CTNNB1;CTNND2;CUL3;CUL7;CYFIP1;DCX;DDX3X;DIP2C;DLG1;DMXL2;DOCK1;DOCK4;DST;DYNC1H1;EEF1A2;EHMT1;EIF4E;EP300;EP400;EPHB2;ERBB4;ERBIN;ESR1;EXOC3;EXT1;FAT1;FBN1;FEZF2;FGD1;FMR1;FOXP2;GAP43;GNA…
	SFARI	CLIP+RNA+Top5%	vNeuron	3.95122e-19	155	ADNP;AFF2;AFF4;AGAP1;AHDC1;ANK2;ANK3;APC;AR;ARHGAP32;ARID1B;ARNT2;ASPM;BIRC6;BRAF;CACNA1H;CADPS2;CAMSAP2;CASK;CCDC88C;CCT4;CD44;CDC42BPB;CHD7;CHD8;CLASP1;CREBBP;CSNK1D;CTNNB1;CTNND2;CUL3;CUL7;CYFIP1;DDX3X;DGKK;DIP2C;DLG1;DLG4;DOCK1;DOCK10;DYNC1H1;EIF4E;EML1;EP300;EP400;EPHB2;ERBB4;ESR1;FAT1;FMR1;GAS2;GRIK3;GSK3B;HCFC1;HDAC3;HDAC4;HDAC6;HECTD4;HERC2;HLA-A;HLA-DRB1;HNRNPU;HRAS;HUWE1;IRF2BPL;KAT2B;K…
	IQ	CLIP alone	dNPC	0.00118509	17	BSN;CSE1L;DMXL2;EEA1;EXOC4;MGAT3;MORC2;MTMR4;NT5DC2;PBRM1;PTCH1;RBL2;SFMBT1;SND1;TCF20;TRIM37;ZNF638
	IQ	CLIP alone	dNeuron	0.0168749	9	BSN;CSE1L;MGAT3;MTMR4;NT5DC2;PBRM1;SND1;TCF20;TRIM37
	IQ	CLIP alone	vNPC	0.000403944	18	APEH;BSN;CSE1L;DMXL2;EXOC4;GPD2;METTL13;MORC2;MTMR4;NT5DC2;PBRM1;PTCH1;QRICH1;RBL2;SND1;STAU1;TCF20;ZNFX1
	IQ	CLIP alone	vNeuron	0.309712	6	BSN;CSE1L;EXOC4;NT5DC2;PBRM1;TCF20
	IQ	CLIP+RNA+Top5%	dNPC	0.0191036	19	BSN;CSE1L;DMXL2;EEA1;EXOC4;MGAT3;MORC2;MTMR4;NPM3;NT5DC2;PBRM1;PTCH1;RBL2;RBM5;SFMBT1;SND1;TCF20;TRIM37;ZNF638
	IQ	CLIP+RNA+Top5%	dNeuron	0.0101489	13	BSN;CREB3L4;CSE1L;MGAT3;MTMR2;MTMR4;NT5DC2;PBRM1;RHOA;SND1;TCF20;TRIM37;VPS54
	IQ	CLIP+RNA+Top5%	vNPC	0.00612499	20	APEH;BSN;CSE1L;DMXL2;EXOC4;GPD2;METTL13;MORC2;MTMR2;MTMR4;NT5DC2;PBRM1;PTCH1;QRICH1;RBL2;RBM5;SND1;STAU1;TCF20;ZNFX1
	IQ	CLIP+RNA+Top5%	vNeuron	0.598748	7	BSN;CSE1L;EXOC4;MTMR2;NT5DC2;PBRM1;TCF20

## Sheet: S6B. Summary DisGeNet
Supplmental Table S6B. Summary: Top 10 ranked enriched diseases or symptoms (DisGeNet) per cell type. Terms are ranked by q-value. Related to Fig. 6B
Set name	dNPC	dNeuron	vNPC	vNeuron
CLIP alone	Intellectual Disability	Tobacco Use Disorder	Intellectual Disability	Tobacco Use Disorder
	Short stature	Intellectual Disability	Malignant neoplasm of breast	Intellectual Disability
	Tobacco Use Disorder	Microsatellite Instability	Muscle hypotonia	Muscle hypotonia
	Orbital separation excessive	Broad flat nasal bridge	Short stature	Congenital malformation syndrome
	Broad flat nasal bridge	Nasal bridge wide	Orbital separation excessive	Orbital separation excessive
	Nasal bridge wide	Short stature	Breast Carcinoma	Downward slant of palpebral fissure
	Intrauterine retardation	Birthmark	Long philtrum	Dull intelligence
	Infant, Small for Gestational Age	Malignant neoplasm of breast	Downward slant of palpebral fissure	Low intelligence
	Downward slant of palpebral fissure	Mental Retardation	Broad flat nasal bridge	Mental Retardation
	Fetal Growth Retardation	Muscle hypotonia	Mental Retardation	Mental deficiency
	Small head	Adenoid Cystic Carcinoma	Nasal bridge wide	Poor school performance
		Cafe-au-Lait Spots	Dull intelligence	Short stature
		Bushy eyebrows	Intrauterine retardation	Bulging forehead
		Orbital separation excessive	Low intelligence	Bushy eyebrows
		Breast Carcinoma	Mental deficiency	Postnatal growth retardation
		Dull intelligence	Poor school performance	Prominent forehead
		Low intelligence	Colorectal Carcinoma	aggressive cancer
		Mental deficiency	Infant, Small for Gestational Age	Left Ventricular Non-Compaction Syndrome
		Poor school performance		Adenoid Cystic Carcinoma
				Sotos' syndrome
Set name	dNPC	dNeuron	vNPC	vNeuron
CLIP+RNA+Top5%	Malignant neoplasm of breast	Serous cystadenocarcinoma ovary	Malignant neoplasm of breast	Malignant neoplasm of breast
	Non-Small Cell Lung Carcinoma	Neoplasm Metastasis	Colorectal Carcinoma	Breast Carcinoma
	Fanconi Anemia	Malignant neoplasm of breast	Neoplasm Metastasis	Neoplasm Metastasis
	Breast Carcinoma	Hyperactive behavior	Breast Carcinoma	Colorectal Cancer
	Colorectal Cancer	Tumor Progression	Tumor Progression	Colorectal Carcinoma
	Mammary Neoplasms	Breast Carcinoma	Non-Small Cell Lung Carcinoma	Tumor Progression
	Liver carcinoma	Central neuroblastoma	Colorectal Cancer	Glioblastoma
	Colorectal Carcinoma	Neuroblastoma	Primary malignant neoplasm of lung	Non-Small Cell Lung Carcinoma
	Primary malignant neoplasm of lung	Medulloblastoma	Adenocarcinoma of lung (disorder)	Adenocarcinoma of lung (disorder)
	FANCONI ANEMIA, COMPLEMENTATION GROUP A (disorder)	Non-Small Cell Lung Carcinoma	Mammary Neoplasms	Colon Carcinoma
		Adenocarcinoma of lung (disorder)		Myeloid Leukemia, Chronic
		Carcinogenesis		Primary malignant neoplasm of lung
		Mammary Neoplasms

## Sheet: S6C. All enrichments (dNPC)
Supplmental Table S6C. Full list of enriched diseases or symptoms from DisGeNet in dNPC-specific CLIP targets and gene set obtained from network-based diffusion.
Tested for enrichment of diseases terms in DisGeNet using FDR corrected hypergeometric test
FDR: Benjamini-Hochberg-corrected hypergeometric p-value (<0.05)
Overlapped genes are genes that contribute to enrichment
CLIP alone					CLIP + RNA + TOP 5%
Disease term	FDR	Number of overlap	Overlaped genes		Disease term	FDR	Number of overlap	Overlaped genes
Intellectual Disability	5.61475e-13	178	ABCA1;ACTG1;ADNP;AFF2;AHDC1;AMER1;ANK3;ANKRD11;APC;APC2;ARFGEF2;ARHGEF2;ARID1A;ARID1B;ARID2;ASCC3;ASPM;ATP7A;ATR;ATRX;BAZ1B;BCOR;BCR;BRCA2;BRWD3;BUB1;C2CD3;CASK;CC2D2A;CDC42BPA;CDK5RAP2;CENPE;CHD2;CHD7;CHD8;CIC;CLIP2;COL4A3BP;CPS1;CREBBP;CTCF;CTNNB1;CTNND2;CUL4B;CYFIP1;DCHS1;DICER1;DIP2B;DMXL2;DOCK6;DOPEY2;DYNC1H1;EFTUD2;EHMT1;EIF3A;EP300;FANCD2;FANCI;FASN;FASTKD2;FBN1;FGD1;FGFR1;FLII;FLNA;FLNB;F…		Malignant neoplasm of breast	1.23852e-20	690	AARS;ABCA1;ABCC4;ABL1;ACACA;ACTN1;ACTN4;ADAR;ADGRL2;AFDN;AGO2;AKAP12;AKAP13;AKAP9;AKT1;AMPH;ANKRD11;ANKRD12;ANXA2;AP2A1;APBB1;APC;APEX1;AR;ARFGEF1;ARFGEF3;ARHGAP32;ARHGEF12;ARHGEF2;ARID1A;ASAP1;ASH2L;ASPM;ASXL1;ATAD2;ATF4;ATM;ATP2B1;ATP2B4;ATP7A;ATR;ATRIP;ATRX;AURKA;AURKB;AXIN1;BARD1;BCAR1;BCL9;BCORL1;BCR;BDP1;BIRC5;BIRC6;BLM;BRAF;BRCA1;BRCA2;BRD8;BRWD3;BTRC;BUB1;BUB1B;BYSL;CABIN1;CAD;CALM1;CALM2…
Short stature	1.04553e-11	99	AARS;ADNP;AGL;ALMS1;ANKRD11;ARID1A;ARVCF;ATM;ATP7A;ATR;ATRX;BAZ1B;BCOR;BCR;BLM;BRCA2;BUB1;CASK;CENPE;CLIP2;CREBBP;CTCF;CTNND2;CUL4B;CUL7;DIAPH1;DMXL2;EFTUD2;EP300;FANCD2;FANCI;FBN1;FGD1;FGFR1;FLII;FLNA;FLNB;GLI2;GLI3;GNAS;GTF2I;HCFC1;HDAC6;HERC2;HSD17B4;HSPG2;IARS2;IFT140;IFT172;IGF1R;INSR;KAT6B;KDM5C;KMT2A;KMT2D;LEMD3;LONP1;LRP5;MED12;NBAS;NF1;NIPBL;NOTCH2;NOTCH3;NSD2;OBSL1;OCRL;OGDH;PCNT;PEX1;P…		Non-Small Cell Lung Carcinoma	1.16601e-18	352	ABCA1;ABCC4;ABL1;ACLY;ACTN4;AGO2;AKT1;ANXA2;APAF1;APC;APEX1;AR;ARHGEF2;ARID2;ASXL1;ATF4;ATM;ATP7A;ATR;ATRX;AURKA;AURKB;BAG6;BARD1;BCAR1;BIRC5;BIRC6;BRAF;BRCA1;BRCA2;BRD7;BUB1;CALM1;CALM2;CALM3;CAV1;CBL;CCDC88A;CCNB1;CCND1;CCT4;CD44;CDC42;CDH1;CDH2;CDK2;CDK4;CDK9;CDKN1A;CFTR;CHEK1;CNR1;COL4A3BP;CREB1;CREBBP;CRK;CSTF2;CTNNB1;CTNND1;CTNND2;CUL7;DDB1;DDR1;DDX5;DICER1;DNMT1;DOCK3;DROSHA;DSP;EGF;EGFR;E…
Tobacco Use Disorder	1.61599e-10	351	ABCA1;ABCC4;ACACA;ADAMTS9;ADAR;ADGRL3;ADGRV1;AFDN;AGL;AKAP13;AKAP9;ALMS1;ALS2;AMPH;ANK2;ANK3;ANKIB1;ANKRD12;ANKRD17;AP1G1;AP3B1;AP3D1;APAF1;APBB1;AQR;ARFGEF1;ARHGEF12;ARID1B;ARVCF;ASCC3;ATG2A;ATP2B4;ATP9A;BAZ1A;BCL9;BCR;BDP1;BOD1L1;BRCA1;BRD1;CABIN1;CAD;CCDC88A;CDC42BPB;CDH2;CECR2;CELSR1;CEP170;CEP192;CEP295;CEP350;CHD1;CHD2;CHD6;CHD9;CLASP2;CLIP2;CPS1;CRMP1;CRYBG3;CSDE1;CTNNA2;CTNND2;CUL1;DAAM1;…		Fanconi Anemia	2.10892e-18	92	ABCC4;ABL1;AR;ASXL1;ATF7IP;ATM;ATR;BCR;BLM;BRCA1;BRCA2;CCNB1;CDC42;CDH1;CDKN1A;CHEK1;CTBP1;DCLRE1A;DDB1;DNA2;EIF2AK2;EPHB2;ERBB2;ESR1;FANCA;FANCC;FANCD2;FANCG;FANCI;GOLGA4;GSK3B;GSTP1;H2AFX;HDAC9;HIF1A;HSP90AA1;INSR;JAK1;JAK2;KAT5;LRP2;MAPK1;MAPK8;MCM4;MLH1;MSH2;MSH3;MSH6;MTOR;NCAM1;NME1;NOTCH1;NPM1;OCRL;PAFAH1B1;PALB2;PARP1;PCNA;POLD1;PRDX6;PRKDC;PTPRU;RAC1;RAD18;RAD51;RB1;RELA;RPS19;RUVBL1;RUVB…
Orbital separation excessive	2.79677e-10	60	AHDC1;ANKRD11;APC2;ATRX;CASK;CENPF;CTNND2;DCHS1;FBN1;FGD1;FGFR1;FIG4;FLII;FLNA;FLNB;GLI3;GRIP1;HSD17B4;INPPL1;INSR;JAG1;KAT6B;KMT2A;LEMD3;LRP2;LRP4;LRP5;LRPPRC;LTBP4;MED12;MEGF8;NF1;NOTCH2;NOTCH3;NSD2;PACS1;PEX1;PEX5;PHGDH;PIK3CA;POLR1A;PPP2R1A;PPP2R5D;PTCH1;PTPN11;RAI1;RB1;ROR2;SEC23A;SEC24D;SETD2;SIN3A;SLC12A6;SOS1;SOS2;STAT3;TRIM37;TTC37;WASHC5;ZNF592		Breast Carcinoma	1.17038e-17	661	AARS;ABCA1;ABCC4;ABL1;ACACA;ACTN1;ACTN4;ADAR;ADGRL2;AFDN;AGO2;AKAP12;AKAP13;AKAP9;AKT1;AMPH;ANKRD11;ANKRD12;ANXA2;AP2A1;APBB1;APC;APEX1;AR;ARFGEF1;ARFGEF3;ARHGAP32;ARHGEF12;ARHGEF2;ARID1A;ASAP1;ASH2L;ASXL1;ATAD2;ATF4;ATM;ATP2B1;ATP2B4;ATP2C1;ATP7A;ATR;ATRX;AURKA;AURKB;AXIN1;BARD1;BCAR1;BCL9;BCORL1;BCR;BDP1;BIRC5;BIRC6;BLM;BRAF;BRCA1;BRCA2;BRD8;BRWD3;BTRC;BUB1;BUB1B;BYSL;CABIN1;CAD;CALM1;CALM2;CAL…
Broad flat nasal bridge	1.01e-09	56	ADNP;AP3B1;ARID1A;ARVCF;ATRX;BAZ1B;CASK;CENPF;CLIP2;CREBBP;CTNND2;DCHS1;EP300;FBN1;FGD1;FGFR1;FLII;FLNA;FLNB;GLI3;GRIP1;GTF2I;HSPG2;IFT140;IFT172;IGF1R;KMT2D;LRPPRC;LTBP4;MED12;MEGF8;NSD2;PCNT;PEX1;PEX5;PIK3R1;PRPF6;PRPF8;PTCH1;PTPN11;RAB3GAP2;RAD21;RAI1;RB1;RBM10;ROR2;SEC23A;SEC24C;SIN3A;SLC12A6;SMARCA4;SNRNP200;STAT3;TRIM37;UBA1;WASHC5		Colorectal Cancer	1.53356e-17	432	ABCA1;ABCC4;ABL1;ACLY;ACO1;ACTN4;ADAR;AGO2;AKAP12;AKAP9;AKT1;AMER1;ANKRD12;AP3B1;APAF1;APC;APEX1;AR;ARHGAP35;ARHGEF12;ARID1A;ASAP1;ASCC3;ATF4;ATG2B;ATM;ATP5A1;ATP7A;ATR;ATRX;AURKA;AURKB;AXIN1;BCAR1;BCL9;BCR;BIRC5;BIRC6;BLM;BPTF;BRAF;BRCA1;BRCA2;BRD7;BRD8;BTRC;BUB1;BUB1B;CAD;CALR;CARM1;CASK;CASP8AP2;CAV1;CCDC88A;CCNB1;CCND1;CCT3;CCT5;CCT6A;CCT7;CD44;CDC40;CDC42;CDC7;CDH1;CDK2;CDK4;CDK9;CDKN1A;CENP…
Nasal bridge wide	1.01e-09	56	ADNP;AP3B1;ARID1A;ARVCF;ATRX;BAZ1B;CASK;CENPF;CLIP2;CREBBP;CTNND2;DCHS1;EP300;FBN1;FGD1;FGFR1;FLII;FLNA;FLNB;GLI3;GRIP1;GTF2I;HSPG2;IFT140;IFT172;IGF1R;KMT2D;LRPPRC;LTBP4;MED12;MEGF8;NSD2;PCNT;PEX1;PEX5;PIK3R1;PRPF6;PRPF8;PTCH1;PTPN11;RAB3GAP2;RAD21;RAI1;RB1;RBM10;ROR2;SEC23A;SEC24C;SIN3A;SLC12A6;SMARCA4;SNRNP200;STAT3;TRIM37;UBA1;WASHC5		Mammary Neoplasms	1.83317e-17	402	ABCA1;ABL1;ACACA;ADGRL2;AFDN;AGO2;AKAP12;AKAP13;AKAP9;AKT1;ANXA2;AP2A1;APC;APC2;APEX1;AR;ARFGEF1;ARID1A;ATAD2;ATM;ATP2B1;ATP2C1;ATRX;AURKA;AURKB;BARD1;BCAR1;BCORL1;BCR;BIRC5;BLM;BRAF;BRCA1;BRCA2;BRD7;CACNA1H;CARM1;CAV1;CBX5;CCAR1;CCAR2;CCNB1;CCND1;CCT5;CD44;CDC42;CDC6;CDH1;CDH2;CDK2;CDK4;CDK5;CDK7;CDK9;CDKN1A;CENPF;CFTR;CHAF1A;CHEK1;CKS1B;CLSPN;COL4A2;CREB1;CREBBP;CRK;CSNK2A1;CTBP1;CTCF;CTNNB1;CT…
Intrauterine retardation	1.17564e-09	46	AARS;ARID1A;ATP5A1;ATP7A;ATR;BCR;BLM;CENPE;CTNND2;CUL7;FGFR1;FIG4;FLNB;GLI3;HDAC6;IGF1R;INSR;JAG1;KIF14;KIF5C;LEMD3;MCM4;NIN;NIPBL;NSD2;OBSL1;ORC1;PCNT;PEX5;PHGDH;PIK3R1;PTPN11;RAB3GAP2;RAD21;RB1;RBM10;SEC24D;SIN3A;SMARCA4;SMARCAL1;SMC3;TRIM37;TTC37;WASHC5;XPR1;ZNF592		Liver carcinoma	1.857e-16	502	ABCA1;ABCA2;ABCC4;ACACA;ACLY;ACO1;ACSL3;ACTL6A;ACTN4;ADAR;AGO2;AKAP12;AKT1;ALAS1;AMER1;ANAPC1;ANXA2;AP3B1;APAF1;APC;APEX1;AR;ARHGEF2;ARID1A;ARID1B;ARID2;ASAP1;ASH2L;ASPM;ATAD2;ATF4;ATM;ATP1A1;ATP5H;AURKA;AURKB;AXIN1;BCAR1;BCL9;BCOR;BCORL1;BCR;BIRC5;BRAF;BRCA1;BRCA2;BRD1;BRD7;BTRC;BUB1;BUB1B;CABIN1;CAD;CALM1;CALM2;CALM3;CALR;CARM1;CAV1;CCDC88A;CCNB1;CCND1;CCT3;CCT8;CD44;CDC16;CDC20;CDC42;CDC5L;CDC…
Infant, Small for Gestational Age	1.3187e-09	46	AARS;ARID1A;ATP5A1;ATP7A;ATR;BCR;BLM;CENPE;CTNND2;CUL7;FGFR1;FIG4;FLNB;GLI3;HDAC6;IGF1R;INSR;JAG1;KIF14;KIF5C;LEMD3;MCM4;NIN;NIPBL;NSD2;OBSL1;ORC1;PCNT;PEX5;PHGDH;PIK3R1;PTPN11;RAB3GAP2;RAD21;RB1;RBM10;SEC24D;SIN3A;SMARCA4;SMARCAL1;SMC3;TRIM37;TTC37;WASHC5;XPR1;ZNF592		Colorectal Carcinoma	2.05789e-16	421	ABCA1;ABCC4;ABL1;ACLY;ACO1;ACTN4;AGO2;AKAP12;AKAP9;AKT1;AMER1;ANKRD12;AP3B1;APAF1;APC;APEX1;AR;ARHGAP35;ARHGEF12;ARID1A;ASAP1;ATF4;ATM;ATP5A1;ATP7A;ATR;ATRX;AURKA;AURKB;AXIN1;BCAR1;BCL9;BCR;BIRC5;BIRC6;BLM;BPTF;BRAF;BRCA1;BRCA2;BRD7;BRD8;BTRC;BUB1;CAD;CALR;CARM1;CASK;CASP8AP2;CAV1;CCDC88A;CCNB1;CCND1;CCT3;CCT5;CCT6A;CCT7;CD44;CDC40;CDC42;CDC7;CDH1;CDK2;CDK4;CDK9;CDKN1A;CENPE;CFTR;CHAF1A;CHD7;CHD8…
Downward slant of palpebral fissure	1.36736e-09	45	ADNP;AHDC1;APC2;ATR;CENPE;CHD7;CREBBP;CTNND2;CUL4B;DYNC1H1;EFTUD2;EP300;FBN1;FGD1;FGFR1;FLNA;KAT6B;KIF11;KMT2A;LRP2;LRP4;MED12;NF1;NOTCH2;NOTCH3;NSD2;PACS1;PCNT;PIK3CA;POLR1A;PPP2R1A;PPP2R5D;PTCH1;PTPN11;RAB3GAP2;RAI1;ROR2;SEC24D;SETD2;SIN3A;SOS1;SOS2;SZT2;TTC37;WASHC5		Primary malignant neoplasm of lung	3.57393e-16	357	ABCA1;ABCC4;ABL1;ACACA;ACLY;ACSL3;ACTN4;AGO2;AKT1;ANXA2;APAF1;APC;APEX1;AR;ARHGEF2;ASH1L;ASXL1;ATF4;ATM;ATP2C1;ATR;AURKA;AURKB;AXIN1;BAG6;BARD1;BCAR1;BCR;BIRC5;BMS1;BPTF;BRAF;BRCA1;BRCA2;BTRC;BUB1;BUB1B;CALM1;CALM2;CALM3;CAV1;CBX5;CCNB1;CCND1;CD44;CDC20;CDC42;CDC45;CDC6;CDH1;CDH2;CDK2;CDK4;CDK5;CDKN1A;CFTR;CHEK1;CKS1B;CLSPN;COL4A2;CREB1;CRMP1;CSTF2;CTCF;CTNNB1;CTNND1;CTNND2;CUL3;DDR1;DICER1;DLL1;…
Fetal Growth Retardation	2.08782e-09	55	AARS;APC;ARID1A;ATP1A1;ATP5A1;ATP7A;ATR;BCR;BLM;CENPE;CTNND2;CUL7;DNMT1;FGFR1;FIG4;FLNB;GLI3;HDAC2;HDAC6;IGF1R;INSR;IRS2;JAG1;KIF14;KIF5C;LEMD3;MCM4;MTHFD1;MTOR;MTR;NIN;NIPBL;NSD2;OBSL1;ORC1;PCNT;PEX5;PHGDH;PIK3R1;PTPN11;RAB3GAP2;RAD21;RB1;RBM10;SEC24D;SIN3A;SMARCA4;SMARCAL1;SMC3;TRIM37;TTC37;UNC13A;WASHC5;XPR1;ZNF592		FANCONI ANEMIA, COMPLEMENTATION GROUP A (disorder)	3.97608e-16	80	ABL1;AR;ASXL1;ATF7IP;ATM;ATR;BCR;BLM;BRCA1;BRCA2;CCNB1;CDH1;CDKN1A;CHEK1;CTBP1;DCLRE1A;DNA2;EIF2AK2;EPHB2;ERBB2;ESR1;FANCA;FANCC;FANCD2;FANCG;FANCI;GOLGA4;GSK3B;H2AFX;HIF1A;HSP90AA1;INSR;JAK1;JAK2;KAT5;MAPK1;MAPK8;MLH1;MSH2;MSH3;MSH6;MTOR;NCAM1;NME1;NOTCH1;NPM1;PAFAH1B1;PALB2;PARP1;PCNA;POLD1;PRDX6;PTPRU;RAC1;RAD18;RAD51;RB1;RELA;RPS19;SF3B1;SMAD4;SMARCA4;SPTBN1;STAT1;TERF2;TP53;TP53BP1;TXN;TYRO3…
Small head	3.04428e-09	76	AARS;ANKRD11;AP3B1;ARFGEF2;ARID1A;ATP5A1;ATP7A;ATR;ATRX;BAZ1B;BCOR;BCR;BLM;BRCA2;BUB1;C2CD3;CASK;CENPE;CENPF;CLIP2;CPT2;CREBBP;CTCF;CTNNB1;CTNND2;DHTKD1;DIAPH1;DYNC1H1;EFTUD2;EP300;FANCD2;FANCI;FGFR1;FIG4;GLI2;GRIP1;GTF2I;HCFC1;IGF1R;KAT6A;KAT6B;KIF11;KIF14;KIF1A;KIF5C;KMT2D;LARS;LEMD3;LRP5;MCM4;NF1;NIN;NIPBL;NSD2;ORC1;PCNT;PEX1;PEX5;PHGDH;POLG;POLR1A;PRKDC;RAB3GAP2;RAD21;RARS;RB1;SALL1;SBF1;SIN3…		Leukemia, Myelocytic, Acute	4.50536e-16	288	ABCA1;ABCA3;ABCC4;ABL1;AFDN;AGO2;AGRN;AKAP12;AKAP13;AKT1;AMER1;ANXA2;AP2A1;APAF1;APEX1;AR;ARHGEF12;ARHGEF2;ASXL1;ATF7IP;ATM;ATP7A;ATR;AURKA;AURKB;BARD1;BCOR;BCORL1;BCR;BIRC5;BIRC6;BLM;BRAF;BRCA1;BRCA2;BRD7;BTRC;BUB1;BUB1B;CALM1;CALM2;CALM3;CALR;CAV1;CBL;CCNB1;CCND1;CD44;CDC7;CDH1;CDH2;CDK2;CDK4;CDK9;CDKN1A;CEBPZ;CHD1;CHD4;CHD8;CHEK1;CREB1;CREBBP;CRK;CSNK2A1;CTNNA1;CTNNB1;DAXX;DDR1;DDX18;DDX46;DHX…
Malignant neoplasm of breast	3.25542e-09	436	AARS;ABCA1;ABCC4;ABL1;ACACA;ACTN1;ACTN4;ADAR;ADGRL2;AFDN;AKAP12;AKAP13;AKAP9;AMPH;ANKRD11;ANKRD12;AP2A1;APBB1;APC;ARFGEF1;ARFGEF3;ARHGAP32;ARHGEF12;ARHGEF2;ARID1A;ASAP1;ASPM;ASXL1;ATAD2;ATM;ATP2B1;ATP2B4;ATP7A;ATR;ATRX;BCAR1;BCL9;BCORL1;BCR;BDP1;BIRC6;BLM;BRCA1;BRCA2;BRD8;BRWD3;BUB1;CABIN1;CAD;CCAR2;CCDC88C;CCT4;CDC42BPA;CDC42BPB;CDH2;CDK12;CELSR2;CENPE;CENPF;CEP250;CHAF1A;CIC;CKAP2;CKAP5;CLASP1;…		Malignant neoplasm of lung	5.53499e-16	401	ABCA1;ABCC4;ABL1;ACACA;ACLY;ACSL3;ACTN4;AGO2;AKAP9;AKT1;ANXA2;APAF1;APC;APEX1;AR;ARHGEF2;ARID2;ASH1L;ASXL1;ATAD2;ATF4;ATM;ATP2C1;ATR;AURKA;AURKB;AXIN1;BAG6;BARD1;BCAR1;BCR;BIRC5;BIRC6;BLM;BMS1;BPTF;BRAF;BRCA1;BRCA2;BTRC;BUB1;BUB1B;CALM1;CALM2;CALM3;CAV1;CBL;CBX5;CCAR2;CCNB1;CCND1;CD44;CDC20;CDC42;CDC45;CDC6;CDH1;CDH2;CDK2;CDK4;CDK5;CDK7;CDKN1A;CFTR;CHEK1;CKS1B;CLSPN;COL4A2;CREB1;CRK;CRMP1;CSTF1;C…
Mental Retardation	6.62926e-09	133	ABCA1;ADNP;AFF2;AHDC1;ANK3;ANKRD11;APC;APC2;ARFGEF2;ARID1A;ASPM;ATP7A;ATR;ATRX;BAZ1B;BCOR;BCR;BRCA2;BUB1;C2CD3;CASK;CC2D2A;CDC42BPA;CDK5RAP2;CENPE;CHD2;CHD7;CLIP2;COL4A3BP;CPS1;CREBBP;CTCF;CTNNB1;CTNND2;CUL4B;DCHS1;DICER1;DIP2B;DMXL2;DOPEY2;DYNC1H1;EFTUD2;EP300;FANCD2;FANCI;FASTKD2;FGD1;FGFR1;FLII;FLNA;FLNB;FUS;FXR1;GLDC;GNAS;GRIP1;GTF2I;HCFC1;HERC2;HSPG2;HUWE1;IFT140;IFT172;IGF1R;KANK1;KAT6A;KAT…		Carcinogenesis	7.39282e-16	586	ABCA1;ABL1;ACLY;ACTN4;ADAR;ADCY3;AFDN;AGO2;AKAP11;AKAP12;AKAP13;AKT1;AMBN;AMER1;ANXA2;APAF1;APC;APEX1;AR;ARHGAP21;ARHGEF2;ARID1A;ASAP1;ASCC3;ASH1L;ATAD2;ATF4;ATM;ATP5B;ATR;AURKA;AURKB;AXIN1;BARD1;BCAR1;BCR;BIRC5;BLM;BPTF;BRAF;BRCA1;BRCA2;BRD7;BTRC;BUB1;BUB1B;BYSL;CALM1;CALM2;CALM3;CALR;CAND1;CARM1;CASK;CASP8AP2;CAV1;CBL;CBX5;CCAR1;CCAR2;CCDC88A;CCNB1;CCND1;CCT6A;CD2BP2;CD44;CDC20;CDC42;CDC5L;CDC6…
Micrognathism	8.85253e-09	60	AHDC1;ANKRD11;ATP7A;ATR;ATRX;BAZ1B;BUB1;CASK;CCT3;CENPE;CENPF;CLIP2;CREBBP;DCHS1;EFTUD2;EP300;FBN1;FGFR1;FIG4;FLII;FLNA;FLNB;GTF2I;HSD17B4;HSPG2;IGF1R;KAT6B;KDM5C;LRP4;LRP6;LTBP4;MED12;NIPBL;NOTCH2;NOTCH3;NSD2;ORC1;PCNT;PEX1;PEX5;PHGDH;PI4KA;PIK3CA;PIK3R1;POLD1;POLR1A;PTPN11;RAB3GAP2;RAD21;RAI1;RB1;RBM10;ROR2;SEC24D;SMC3;SOS1;SOS2;UBA1;WASHC5;ZNF592		Glioblastoma	8.23205e-16	328	ABCC4;ABL1;AGO2;AKT1;ANXA2;APAF1;APC;APEX1;AR;ARHGAP21;ARHGEF2;ASAP1;ASPM;ATM;ATP5A1;ATP5B;ATR;ATRX;AURKA;AURKB;BCAR1;BCR;BIRC5;BRAF;BRCA1;BRCA2;BTRC;BUB1;BUB1B;CALM1;CALM2;CALM3;CALR;CAV1;CBL;CCNB1;CCND1;CD44;CDC20;CDC42;CDH2;CDK2;CDK4;CDK5;CDK7;CDK9;CDKN1A;CENPU;CEP350;CHAF1A;CHD4;CIC;CLTC;CMAS;CNOT1;CREB1;CRK;CSE1L;CSNK2A1;CTCF;CTNNA1;CTNNB1;CTNND2;CUL3;DAXX;DCHS1;DDR1;DMXL1;DNER;DNMT1;DOCK1;D…
Long philtrum	1.01203e-08	38	ACTG1;ANKRD11;AP3B1;ARVCF;ATP7A;BAZ1B;BCOR;CASK;CLIP2;CTNNB1;CUL7;FBN1;FGD1;FGFR1;GTF2I;HSD17B4;IARS2;IGF1R;INPPL1;KAT6B;KIF11;KMT2A;LTBP4;MED12;NBAS;NIPBL;NOTCH2;NOTCH3;OBSL1;PTCH1;RAD21;ROR2;SEC23A;SEC24C;SIN3A;SMC3;TTC37;UBA1		Short stature	1.82531e-15	138	AARS;ADNP;AGL;ALMS1;ANKRD11;ARID1A;ARVCF;ATM;ATP7A;ATR;ATRX;BAZ1B;BCOR;BCR;BLM;BRAF;BRCA2;BUB1;BUB1B;CASK;CAV1;CDON;CENPE;CLIP2;CREBBP;CTBP1;CTCF;CTNND2;CUL4B;CUL7;DIAPH1;DKC1;DMXL2;DNA2;EFNB1;EFTUD2;ELN;EP300;FANCA;FANCC;FANCD2;FANCG;FANCI;FBN1;FGD1;FGFR1;FLII;FLNA;FLNB;FMR1;GJA1;GLI2;GLI3;GNAS;GTF2I;HCFC1;HDAC4;HDAC6;HERC2;HRAS;HSD17B4;HSPG2;IARS2;IFT140;IFT172;IGF1R;INSR;KAT6B;KDM5C;KMT2A;KMT2…
Muscle hypotonia	1.18539e-08	99	AARS;ABL1;ACACA;ADCY6;ADNP;AHDC1;ANK3;APC2;ARFGEF2;ARID1A;ARVCF;ATP5A1;ATP7A;ATRX;BAZ1B;BCOR;CAD;CHD7;CLIP2;CPS1;CPT2;CREBBP;CTCF;CTNNB1;CTNND2;CUL4B;DCHS1;DHTKD1;DYNC1H1;EP300;FASTKD2;FBN1;FIG4;FLII;GLDC;GTF2I;HADHA;HCFC1;HERC2;HSPD1;IFT140;INPPL1;KANK1;KAT6A;KAT6B;KIAA0556;KIF1A;KMT2A;KMT2D;LAMB2;LARS;LONP1;LRP5;LRPPRC;MED12;MORC2;MSH2;MSH6;MTR;MYO5A;NBAS;NDUFS1;NOTCH3;NSD2;OGDH;PEX1;PEX5;PHKB;…		leukemia	2.29977e-15	318	ABCA1;ABCC4;ABL1;ACACA;ACTG1;ADAR;AFDN;AKAP13;AKT1;ANXA2;AP2A1;APAF1;APC;APEX1;AR;ARHGEF12;ARHGEF2;ARID1A;ASH2L;ASPM;ASXL1;ATF7IP;ATM;ATR;ATRX;AURKA;AURKB;BCAR1;BCR;BIRC5;BLM;BRAF;BRCA1;BRCA2;BUB1;BUB1B;CALM1;CALM2;CALM3;CALR;CAV1;CBL;CBX5;CCNB1;CCND1;CD44;CDH1;CDK2;CDK4;CDK5;CDK7;CDK9;CDKN1A;CEBPZ;CHEK1;CLCN3;COL17A1;CREB1;CREBBP;CRK;CRMP1;CSE1L;CTCF;CTNNA1;CTNNB1;CTNND1;DAXX;DDR1;DHX32;DIAPH1;D…
Delayed bone age	1.61833e-08	35	ANKRD11;ATR;ATRX;BLM;CENPE;CHD7;CREBBP;CUL7;EP300;FBN1;FGFR1;FLNB;HSD17B4;HSPG2;IGF1R;INPPL1;INSR;KAT6B;LONP1;NIN;NIPBL;NSD2;OBSL1;ORC1;PCNT;PEX1;PIK3R1;PTPN11;RAD21;ROR2;SMC3;SOS1;SOS2;STAT1;ZBTB16		Tumor Progression	2.44321e-15	336	ABCA1;ABCC4;ABL1;AGO2;AKAP12;AKT1;ANXA2;AP2A1;APAF1;APC;APC2;AR;ARHGAP21;ARHGAP35;ARHGEF2;ARID1A;ASAP1;ATAD2;ATF4;ATM;ATR;AURKA;AURKB;BARD1;BCAR1;BCL9;BIRC5;BPTF;BRAF;BRCA1;BRCA2;BRD8;BUB1;BUB1B;CALM1;CALM2;CALM3;CALR;CARM1;CAV1;CBX5;CCDC88A;CCND1;CD44;CDC20;CDC42;CDC6;CDC7;CDH1;CDH2;CDK2;CDK4;CDK5;CDKN1A;CENPF;CHAF1A;CHEK1;CREB1;CREBBP;CRK;CTCF;CTNNA2;CTNNAL1;CTNNB1;CTNND1;CTTN;CYFIP2;DDR1;DDX5;…
Dull intelligence	1.87346e-08	106	ADNP;AFF2;AHDC1;ANK3;ANKRD11;APC2;ARFGEF2;ARID1A;ATP7A;ATR;ATRX;BAZ1B;BCOR;BCR;BRCA2;BUB1;C2CD3;CASK;CENPE;CHD2;CHD7;CLIP2;COL4A3BP;CPS1;CREBBP;CTCF;CTNNB1;CUL4B;DCHS1;DMXL2;DYNC1H1;EFTUD2;EP300;FANCD2;FANCI;FASTKD2;FGD1;FGFR1;FLII;FLNA;FLNB;GLDC;GNAS;GRIP1;GTF2I;HCFC1;HERC2;HSPG2;HUWE1;IFT140;IFT172;IGF1R;KANK1;KAT6A;KAT6B;KIAA0556;KIF4A;KMT2A;KMT2D;LRP2;LYST;MED12;MEGF8;MPDZ;MTR;MYO5A;NF1;NIPBL…		Pancreatic carcinoma	6.73312e-15	294	ABCA1;ABCC4;ACO1;ACTN4;ADAR;AGO2;AKT1;ANXA2;AP2A1;APAF1;APC;APEX1;AR;ARHGEF2;ARID1B;ARID2;ATF4;ATM;AURKA;AURKB;BIRC5;BRAF;BRCA1;BRCA2;BRD7;BRD8;BTRC;BUB1;BUB1B;CALM1;CALM2;CALM3;CALR;CAPN1;CAV1;CBL;CCDC88A;CCND1;CD44;CDC20;CDC42;CDC7;CDH1;CDK2;CDK4;CDK5;CDKN1A;CFTR;CHD1;CHD3;CHD7;CHEK1;CLTC;COL4A2;CREBBP;CRK;CRMP1;CSNK2A1;CTNNB1;CTNND1;CTSC;CTTN;CUL7;DCAF1;DCLK1;DDR1;DICER1;DNER;DNMT1;DPM1;DPYSL3…
Low intelligence	1.87346e-08	106	ADNP;AFF2;AHDC1;ANK3;ANKRD11;APC2;ARFGEF2;ARID1A;ATP7A;ATR;ATRX;BAZ1B;BCOR;BCR;BRCA2;BUB1;C2CD3;CASK;CENPE;CHD2;CHD7;CLIP2;COL4A3BP;CPS1;CREBBP;CTCF;CTNNB1;CUL4B;DCHS1;DMXL2;DYNC1H1;EFTUD2;EP300;FANCD2;FANCI;FASTKD2;FGD1;FGFR1;FLII;FLNA;FLNB;GLDC;GNAS;GRIP1;GTF2I;HCFC1;HERC2;HSPG2;HUWE1;IFT140;IFT172;IGF1R;KANK1;KAT6A;KAT6B;KIAA0556;KIF4A;KMT2A;KMT2D;LRP2;LYST;MED12;MEGF8;MPDZ;MTR;MYO5A;NF1;NIPBL…		Colon Carcinoma	7.95742e-15	333	ABCA1;ACACA;ACTG1;AFDN;AKT1;ANXA2;APAF1;APC;APC2;APEX1;AR;ARHGEF17;ATM;ATP2B4;ATP2C1;ATP7A;ATR;AURKA;AURKB;AXIN1;BARD1;BCAR1;BCL9;BIRC5;BIRC6;BRAF;BRCA1;BRCA2;BUB1;BUB1B;CALM1;CALM2;CALM3;CALR;CASK;CAV1;CBX5;CCAR1;CCDC88A;CCNB1;CCND1;CD44;CDC42;CDH1;CDH2;CDK2;CDK4;CDK5;CDKN1A;CEBPZ;CFTR;CHAF1A;CHD7;CHEK1;CNR1;CREB1;CREBBP;CRK;CSE1L;CSNK2A1;CTCF;CTNNA1;CTNNB1;CTNND1;CTTN;CUL3;CYFIP2;DCAF1;DCLK1;DD…
Poor school performance	1.87346e-08	106	ADNP;AFF2;AHDC1;ANK3;ANKRD11;APC2;ARFGEF2;ARID1A;ATP7A;ATR;ATRX;BAZ1B;BCOR;BCR;BRCA2;BUB1;C2CD3;CASK;CENPE;CHD2;CHD7;CLIP2;COL4A3BP;CPS1;CREBBP;CTCF;CTNNB1;CUL4B;DCHS1;DMXL2;DYNC1H1;EFTUD2;EP300;FANCD2;FANCI;FASTKD2;FGD1;FGFR1;FLII;FLNA;FLNB;GLDC;GNAS;GRIP1;GTF2I;HCFC1;HERC2;HSPG2;HUWE1;IFT140;IFT172;IGF1R;KANK1;KAT6A;KAT6B;KIAA0556;KIF4A;KMT2A;KMT2D;LRP2;LYST;MED12;MEGF8;MPDZ;MTR;MYO5A;NF1;NIPBL…		Malignant neoplasm of pancreas	1.13325e-14	288	ABCA1;ABCC4;ACO1;ACTN4;ADAR;AGO2;AKT1;ANXA2;AP2A1;APAF1;APC;APEX1;AR;ARHGEF2;ARID1B;ARID2;ATF4;ATM;AURKA;AURKB;BIRC5;BRAF;BRCA1;BRCA2;BRD7;BRD8;BTRC;BUB1;BUB1B;CALM1;CALM2;CALM3;CALR;CAPN1;CAV1;CBL;CCND1;CD44;CDC42;CDC7;CDH1;CDK2;CDK4;CDK5;CDKN1A;CFTR;CHD1;CHD7;CHEK1;CLTC;COL4A2;CREBBP;CRK;CRMP1;CSNK2A1;CTNNB1;CTNND1;CTSC;CTTN;CUL7;DAXX;DCAF1;DCLK1;DDR1;DICER1;DNER;DNMT1;DPM1;DPYSL3;EEA1;EEF1A1;E…
Mental deficiency	1.97739e-08	106	ADNP;AFF2;AHDC1;ANK3;ANKRD11;APC2;ARFGEF2;ARID1A;ATP7A;ATR;ATRX;BAZ1B;BCOR;BCR;BRCA2;BUB1;C2CD3;CASK;CENPE;CHD2;CHD7;CLIP2;COL4A3BP;CPS1;CREBBP;CTCF;CTNNB1;CUL4B;DCHS1;DMXL2;DYNC1H1;EFTUD2;EP300;FANCD2;FANCI;FASTKD2;FGD1;FGFR1;FLII;FLNA;FLNB;GLDC;GNAS;GRIP1;GTF2I;HCFC1;HERC2;HSPG2;HUWE1;IFT140;IFT172;IGF1R;KANK1;KAT6A;KAT6B;KIAA0556;KIF4A;KMT2A;KMT2D;LRP2;LYST;MED12;MEGF8;MPDZ;MTR;MYO5A;NF1;NIPBL…		Carcinoma of lung	1.19192e-14	365	ABCA1;ABCC4;ABL1;ACACA;ACLY;ACSL3;ACTN4;AGO2;AKT1;ANXA2;APAF1;APC;APEX1;AR;ARHGEF2;ASH1L;ASXL1;ATF4;ATM;ATP2C1;ATR;AURKA;AURKB;AXIN1;BAG6;BARD1;BCAR1;BCR;BIRC5;BMS1;BPTF;BRAF;BRCA1;BRCA2;BTRC;BUB1;BUB1B;CALM1;CALM2;CALM3;CAV1;CBX5;CCNB1;CCND1;CD44;CDC20;CDC42;CDC45;CDC6;CDH1;CDH2;CDK2;CDK4;CDK5;CDKN1A;CFTR;CHEK1;CKS1B;CLSPN;COL4A2;CREB1;CRK;CRMP1;CSTF2;CTCF;CTNNB1;CTNND1;CTNND2;CUL3;DDR1;DICER1;D…
Hypoplastic mandible condyle	3.0316e-08	58	AHDC1;ANKRD11;ATP7A;ATR;ATRX;BAZ1B;BUB1;CASK;CENPE;CENPF;CLIP2;CREBBP;DCHS1;EFTUD2;EP300;FBN1;FGFR1;FIG4;FLII;FLNA;FLNB;GTF2I;HSD17B4;HSPG2;KAT6B;KDM5C;LRP4;LRP6;LTBP4;MED12;NIPBL;NOTCH2;NOTCH3;NSD2;ORC1;PCNT;PEX1;PEX5;PHGDH;PI4KA;PIK3CA;PIK3R1;POLD1;POLR1A;PTPN11;RAB3GAP2;RAD21;RAI1;RB1;RBM10;ROR2;SEC24D;SMC3;SOS1;SOS2;UBA1;WASHC5;ZNF592		Intellectual Disability	1.9138e-14	243	ABCA1;ACTG1;ADNP;AFF2;AHDC1;AKT1;AMER1;ANK3;ANKRD11;APC;APC2;AR;ARFGEF2;ARHGEF2;ARID1A;ARID1B;ARID2;ASCC3;ASPM;ATP5E;ATP7A;ATR;ATRX;BAZ1B;BCOR;BCR;BRAF;BRCA2;BRWD3;BUB1;BUB1B;C12orf57;C2CD3;CASK;CAV1;CC2D2A;CDC42;CDC42BPA;CDK5;CDK5RAP2;CENPE;CHD2;CHD7;CHD8;CIC;CLIP2;COL4A3BP;CPS1;CREBBP;CTCF;CTNNB1;CTNND2;CUL4B;CYFIP1;DCHS1;DICER1;DIP2B;DKC1;DMXL2;DNA2;DOCK6;DOPEY2;DYNC1H1;EEF1B2;EFNB1;EFTUD2;EHM…
Mandibular hypoplasia	4.02632e-08	58	AHDC1;ANKRD11;ATP7A;ATR;ATRX;BAZ1B;BUB1;CASK;CENPE;CENPF;CLIP2;CREBBP;DCHS1;EFTUD2;EP300;FBN1;FGFR1;FIG4;FLII;FLNA;FLNB;GTF2I;HSD17B4;HSPG2;KAT6B;KDM5C;LRP4;LRP6;LTBP4;MED12;NIPBL;NOTCH2;NOTCH3;NSD2;ORC1;PCNT;PEX1;PEX5;PHGDH;PI4KA;PIK3CA;PIK3R1;POLD1;POLR1A;PTPN11;RAB3GAP2;RAD21;RAI1;RB1;RBM10;ROR2;SEC24D;SMC3;SOS1;SOS2;UBA1;WASHC5;ZNF592		Chronic Lymphocytic Leukemia	2.19279e-14	201	ABCA1;ABL1;AKT1;APAF1;APC;ARHGEF2;ATM;ATR;AURKA;AURKB;BAG6;BCL9;BCOR;BCR;BIRC5;BRAF;BRCA1;BRCA2;BUB1B;CALM1;CALM2;CALM3;CALR;CAV1;CBL;CCND1;CD44;CDC45;CDC6;CDC7;CDH1;CDK2;CDK4;CDK9;CDKN1A;CHD2;CNOT1;CRK;CTNNB1;CTTN;CUL5;CYFIP2;DDX46;DICER1;DLL1;DNMT1;DOCK11;DROSHA;DSP;EGF;EGFR;EIF2AK2;EIF4E;EIF4G1;EPHB2;ERBB2;ESR1;FAT1;FAU;FN1;GJA1;GMNN;GNAS;GPM6A;GSK3B;GSTP1;HDAC9;HIF1A;HIST1H2AB;HIST1H2AE;HIST2…
Cryptorchidism	1.05682e-07	59	ANKRD11;ARID1A;ATP2B1;ATR;ATRX;BCOR;BLM;CHD7;CREBBP;CTCF;CUL4B;EP300;FANCD2;FGD1;FGFR1;FIG4;FLNA;FLNB;GLI2;GLI3;GRIP1;HSPG2;INPPL1;JAG1;KAT6B;KDM5A;KDM5C;KMT2D;MAP3K1;MED12;MEGF8;NF1;NIPBL;NOTCH2;NOTCH3;NSD2;NUMA1;OCRL;ORC1;PACS1;PEX1;PEX5;PHGDH;PNPLA6;POLD1;POLR3B;PTPN11;RAB3GAP2;RAD21;ROR2;SALL1;SEC23A;SIN3A;SMARCA4;SMC3;SOS1;SOS2;UBA1;ZBTB16		Malignant neoplasm of prostate	3.6306e-14	462	ABCA1;ABCC4;ABL1;ACACA;ACO1;ACSL3;AGO2;AKAP12;AKAP13;AKT1;ALAS1;ANK2;ANXA2;APAF1;APC;APEX1;AR;ARHGAP21;ARHGEF12;ARHGEF2;ARVCF;ASAP1;ATAD2;ATM;ATP5A1;ATP5J2;ATRIP;AURKA;AURKB;AXIN1;BAZ2A;BCAR1;BCR;BIRC5;BIRC6;BLM;BMS1;BRAF;BRCA1;BRCA2;BRD1;BRD7;BRD8;BTRC;BUB1;BUD13;CALM1;CALM2;CALM3;CALR;CAND1;CARM1;CAV1;CBX5;CCAR1;CCAR2;CCNB1;CCND1;CD44;CDC42;CDC6;CDH1;CDH2;CDK2;CDK4;CDK5;CDK7;CDK9;CDKN1A;CELSR3;…
Low set ears	2.37014e-07	43	AHDC1;AP3B1;ARID1A;ARVCF;ATR;ATRX;BCOR;CENPF;CPT2;CREBBP;EFTUD2;EP300;FBN1;FGFR1;FIG4;FLNA;GRIP1;HDAC6;HSD17B4;HSPG2;INSR;KAT6A;KAT6B;KMT2A;LRP2;MED12;MEGF8;NF1;NIPBL;NOTCH2;NOTCH3;ORC1;PACS1;PCNT;PEX5;PTCH1;PTPN11;RB1;RBM10;SEC24C;TTC37;WASHC5;ZNF592		Rhabdomyosarcoma	3.6306e-14	103	ACTL6A;AKT1;AP2A1;AP2B1;ATM;ATP2B1;BIRC5;BRAF;BUB1B;CARM1;CAV1;CCND1;CDC42;CDK4;CDKN1A;CIC;CLTC;CNR1;CRK;DICER1;DLL1;EGF;EGFR;EPHA3;EPHB2;ERBB2;ESR1;EWSR1;EZR;FBXW11;FGFR1;FN1;GLI2;GLI3;HDAC6;HIF1A;HLA-C;HMGXB3;HRAS;HSP90AA1;IGF1R;IGF2BP1;INSR;IRS1;JAG1;JARID2;KAT2B;KDM1A;KIDINS220;MAPK1;MAPK14;MAPK8;MCL1;MDM2;MIB1;MKI67;MLH1;MSH2;MSH6;MTOR;MYC;NACA;NCAM1;NCOA1;NCOA2;NES;NF1;NOTCH1;NOTCH3;ODC1;PA…
Breast Carcinoma	3.78781e-07	414	AARS;ABCA1;ABCC4;ABL1;ACACA;ACTN1;ACTN4;ADAR;ADGRL2;AFDN;AKAP12;AKAP13;AKAP9;AMPH;ANKRD11;ANKRD12;AP2A1;APBB1;APC;ARFGEF1;ARFGEF3;ARHGAP32;ARHGEF12;ARHGEF2;ARID1A;ASAP1;ASXL1;ATAD2;ATM;ATP2B1;ATP2B4;ATP2C1;ATP7A;ATR;ATRX;BCAR1;BCL9;BCORL1;BCR;BDP1;BIRC6;BLM;BRCA1;BRCA2;BRD8;BRWD3;BUB1;CABIN1;CAD;CCAR2;CCDC88A;CCDC88C;CCT4;CDC42BPA;CDC42BPB;CDH2;CELSR2;CENPE;CENPF;CHAF1A;CIC;CKAP2;CLIP2;CLSPN;COL4…		Hematologic Neoplasms	4.84372e-14	120	ABCA1;ABL1;AKT1;APAF1;APC;APEX1;ASXL1;ATM;ATRX;BCR;BLM;BRAF;BRCA1;BRCA2;BUB1B;CALR;CBL;CCND1;CD44;CDC20;CDH1;CDK2;CDK4;CDK9;CDKN1A;CREBBP;DLL1;DNER;EGFR;EIF2AK2;EIF4E;EML4;EP300;ERBB2;FANCA;FANCC;FANCD2;FANCG;FEN1;FGFR1;FMR1;HDAC9;HLA-A;HLA-C;HNRNPK;HSP90AA1;HSPA4;JAK1;JAK2;KIF11;KMT2A;KMT2B;KMT2C;KMT2D;LEF1;LIG3;LRP1;MALAT1;MAPK8IP2;MCL1;MDM2;MFHAS1;MLH1;MSH2;MSH6;MTOR;MYC;NCAM1;NCOR1;NME1;NOS2;…
Byzanthine arch palate	6.17598e-07	45	ANKRD11;APC2;ATP7A;ATR;ATRX;CASK;CPT2;CREBBP;CTNND2;CUL4B;DCHS1;EP300;FBN1;FBN2;FGFR1;FLNA;GLI3;HSD17B4;HSPG2;INSR;KAT6B;KMT2A;KMT2D;MED12;MEGF8;NIPBL;NOTCH2;NOTCH3;ORC1;PEX1;PEX5;PIK3CA;PTPN11;RAB3GAP2;RAD21;RBM10;SEC24D;SETD2;SIN3A;SLC12A6;SMC3;SOS1;SOS2;STAT3;ZNF592		Medulloblastoma	4.84372e-14	136	AKAP12;AKT1;APC;AR;ASPM;AURKA;AURKB;AXIN1;BCR;BIRC5;BRCA2;BTRC;CALM1;CALM2;CALM3;CCNB1;CCND1;CDH1;CDK5;CIC;CREBBP;CRK;CRMP1;CTNNB1;DDX42;DDX46;DHX16;DICER1;DIS3L;DNER;DNMT1;EFNB1;EGFR;EHMT1;EIF4E;EPHA3;EPHA7;EPHB2;ERBB2;ESR1;EZR;FBN2;GCN1;GJA1;GLI2;GLI3;GNAS;GNL3;GPC3;GRB2;GSK3B;GSN;HDAC1;HDAC5;HDAC9;HIF1A;HMGA1;HSP90AA1;IGF1R;IRS1;IRS2;KAT2B;KAT6A;KDM4B;KIF14;KIF1B;KIF3A;KMT2C;KMT2D;LDHB;LRPPRC;…
Colorectal Cancer	1.14776e-06	264	ABCA1;ABCC4;ABL1;ACLY;ACO1;ACTN4;ADAR;AKAP12;AKAP9;AMER1;ANKRD12;AP3B1;APAF1;APC;ARHGAP35;ARHGEF12;ARID1A;ASAP1;ASCC3;ATG2B;ATM;ATP5A1;ATP7A;ATR;ATRX;BCAR1;BCL9;BCR;BIRC6;BLM;BPTF;BRCA1;BRCA2;BRD7;BRD8;BUB1;CAD;CASK;CASP8AP2;CCDC88A;CCT3;CCT5;CCT6A;CCT7;CENPE;CHAF1A;CIC;CLTC;CPT2;CREBBP;CSE1L;CTCF;CTNNA1;CTNNB1;CTNND1;CTNND2;DDR1;DDX46;DHX16;DHX32;DHX36;DIAPH1;DICER1;DIS3;DLG5;DLGAP5;DNMT1;DROSHA…		Myeloid Leukemia, Chronic	4.84372e-14	169	ABL1;ACACA;ADAR;AKAP12;AKAP13;AKT1;APAF1;ASXL1;ATM;ATP5E;AURKA;AURKB;BCR;BIRC5;BMS1;BRAF;BRCA1;CALM1;CALM2;CALM3;CAV1;CBL;CBX5;CCND1;CD44;CDC42;CDH1;CDH2;CDK2;CDK4;CDKN1A;CREBBP;CRK;CSNK2A1;CTNNB1;DLL1;DNMT1;EGF;EGFR;EIF3A;EIF4A1;EIF4A2;EIF4E;EP300;EPHB2;ERBB2;ESPL1;ESR1;FANCD2;FGFR1;FN1;GNL3;GOLGA4;GRB2;GSK3B;GSTP1;H2AFX;HDAC1;HIF1A;HIST1H4A;HIST1H4B;HIST1H4C;HIST1H4D;HIST1H4E;HIST1H4H;HIST1H4I;…
Adenoid Cystic Carcinoma	2.14683e-06	41	ARID1A;ASPM;ATM;ATRX;BCOR;BCORL1;BRCA1;BRD1;CENPF;CREBBP;CTNNB1;EP300;EPHB2;ERBB2;ERBIN;ESPL1;FAT1;FN1;HIF1A;HSPG2;JAG1;JMJD1C;KAT6A;KMT2C;MAGI1;MAML3;MFN2;MGA;MIB1;MKI67;MTOR;NOS2;NOTCH1;NSD1;PIK3CA;PRKDC;PYGB;SETD2;SON;TOP2A;VCAN		Triple Negative Breast Neoplasms	5.82741e-14	132	ABL1;AKT1;ANXA2;APEX1;AR;ARID1A;ASPM;ATF4;ATM;ATR;BARD1;BCAR1;BIRC5;BRCA1;BRCA2;BRD7;BTRC;CAV1;CCND1;CD44;CDC20;CDC7;CDH1;CDK4;CDK7;CENPE;CHEK1;COL4A3BP;DDR1;DNER;DNMT1;DROSHA;EGF;EGFR;EIF4B;EIF4E;EPHB2;ERBB2;ESR1;FANCA;FANCD2;FANCI;FASN;FGFR1;FLNA;FMR1;FN1;GAS1;GAS5;H2AFX;HDAC1;HDAC9;HIF1A;HLA-C;HMGA1;HSPA4;IGF1R;ITGA6;JAK1;JAK2;KDM1A;KDM2B;KDM5B;KIAA0100;KIF14;LDHB;LRP6;MAGI3;MALAT1;MAPK1;MAPK8…
Global developmental delay	4.02474e-06	110	AARS;ADAR;ADNP;AHDC1;ALMS1;ANKRD11;APC;APC2;ARFGEF2;ARID1A;ARID2;ARVCF;ATRX;BCR;BRCA2;BUB1;CAD;CASK;CENPE;CHD2;CHD8;COL4A2;COL4A3BP;CPS1;CTCF;CTNNB1;CUL4B;DHTKD1;DICER1;EFTUD2;EP300;FANCD2;FANCI;FASTKD2;FGFR1;FLII;FLNA;GLI2;HADHA;HERC2;HSD17B4;HSPA4;HSPD1;IGF1R;INSR;KARS;KAT6A;KAT6B;KIAA0556;KIF1A;KIF5C;KMT2D;LARS;LEMD3;LONP1;LRP2;LRP5;LRPPRC;LYST;MACF1;MED12;MTR;MYO5A;NDUFS1;NF1;NSD2;OCRL;OGDH;P…		Neoplasm Metastasis	7.53009e-14	534	ABCA1;ABCC4;ABL1;ACACA;ACLY;ACTL6A;ACTN4;ADAR;AFDN;AGO2;AHNAK;AKAP12;AKT1;ANXA2;AP2A1;APAF1;APC;APEX1;AR;ARHGAP32;ARHGAP35;ARHGEF2;ARID1A;ASAP1;ATAD2;ATF4;ATF7IP;ATM;AURKA;AURKB;AXIN1;BAZ2A;BCAR1;BCL9;BCORL1;BIRC5;BIRC6;BLM;BMS1;BRAF;BRCA1;BRCA2;BTRC;BUB1;BUB1B;CALM1;CALM2;CALM3;CALR;CAPN1;CAPRIN1;CARM1;CAV1;CBL;CBX5;CCAR2;CCDC88A;CCNB1;CCND1;CD44;CDC20;CDC42;CDC6;CDH1;CDH2;CDK2;CDK4;CDK5;CDK7;CD…
Curvature of spine	4.03279e-06	54	ALMS1;ARID1A;ATR;BRCA2;CREBBP;CTNND2;CUL4B;DCHS1;EP300;FANCD2;FANCI;FBN1;FGD1;FLII;FLNA;FLNB;GARS;HERC2;HSD17B4;HSPG2;IARS2;IFT122;KAT6B;KIF5A;KMT2D;LONP1;MED12;MFN2;NF1;NOTCH2;NOTCH3;NSD2;OCRL;PCNT;PIK3CA;POLD1;PTCH1;PTPN11;RAB3GAP2;RAI1;ROR2;SBF1;SEC23A;SEC24D;SIN3A;SLC12A6;SMARCA4;SOS1;SOS2;STAT3;SYNJ1;UBA1;UBE3A;WASHC5		Lung Neoplasms	1.23439e-13	213	ABCA1;ABCC4;ABL1;ACLY;AKT1;AMPH;ANXA2;APC;APEX1;AR;ATM;AURKA;AURKB;AXIN1;BAG6;BIRC5;BLM;BRAF;BRCA2;BTRC;BUB1;CAD;CALR;CAV1;CCND1;CD44;CDC42;CDC5L;CDH1;CDK4;CDK7;CDKN1A;CFTR;CHEK1;CREB1;CREBBP;CRK;CTCF;CTNNB1;CTNND1;DDR1;DICER1;DNMT1;DSP;EEF2;EGF;EGFR;EHMT2;EIF2AK2;EIF3E;EIF4E;ELN;EML4;EPHA3;EPS15;ERBB2;ESPL1;ESR1;EWSR1;EZR;FASN;FEN1;FGFR1;FLNB;FMR1;FN1;FUS;GJA1;GPC3;GPX1;GSN;GSTP1;HADHA;HDAC9;HIF…
Strabismus	4.03279e-06	55	ADNP;AP3B1;ARID1A;ATM;ATR;BAZ1B;CASK;CHD7;CLIP2;CREBBP;CTCF;CTNNB1;EP300;FANCD2;FGD1;FGFR1;FLII;FLNA;GTF2I;HERC2;HSD17B4;HSPD1;HSPG2;JAG1;KAT6A;KAT6B;KIF21A;KMT2A;KMT2D;LAMB2;LRPPRC;LYST;MED12;NDUFS1;NIPBL;NOTCH1;NSD2;OPA1;ORC1;PEX1;PEX5;PLXND1;PPP2R5D;PTCH1;PTPN11;RAI1;REV3L;SIN3A;SMARCA4;SOS1;SOS2;TRIM37;UBE3A;ZBTB16;ZNF592		Adenocarcinoma of lung (disorder)	1.23439e-13	180	ABCA3;ABL1;ACLY;ACTN4;AGO2;AKT1;APC2;APEX1;AR;ARHGAP35;ARID1A;ASPM;ATAD2;ATM;ATP2C1;ATP5H;BIRC5;BRAF;CAV1;CCAR2;CCND1;CD44;CDH1;CDH2;CDK4;CDK9;CDKN1A;CHEK1;CNR1;CREBBP;CRK;CRMP1;CTNNB1;CTNND1;CTNND2;DDR1;DICER1;DROSHA;EGF;EGFR;EIF3A;EIF4E;EIF4G2;EML4;EP300;EPHB2;ERBB2;ESR1;EZR;FBXW11;FEN1;FGFR1;FN1;GAS5;GEMIN4;GNAS;GPC3;GRB2;GSK3B;GSN;GSTP1;HDAC1;HDAC2;HDAC9;HIF1A;HIP1;HMGB2;HNRNPD;HNRNPK;HRAS;HS…
Colorectal Carcinoma	4.15285e-06	257	ABCA1;ABCC4;ABL1;ACLY;ACO1;ACTN4;AKAP12;AKAP9;AMER1;ANKRD12;AP3B1;APAF1;APC;ARHGAP35;ARHGEF12;ARID1A;ASAP1;ATM;ATP5A1;ATP7A;ATR;ATRX;BCAR1;BCL9;BCR;BIRC6;BLM;BPTF;BRCA1;BRCA2;BRD7;BRD8;BUB1;CAD;CASK;CASP8AP2;CCDC88A;CCT3;CCT5;CCT6A;CCT7;CENPE;CHAF1A;CHD7;CHD8;CIC;CLTC;CMAS;CPT2;CREBBP;CSE1L;CTCF;CTNNA1;CTNNB1;CTNND1;CTNND2;DDR1;DDX46;DHX16;DHX32;DIAPH1;DICER1;DIS3;DLGAP5;DNMT1;DROSHA;EHMT2;EIF2AK…		Orbital separation excessive	4.62997e-13	81	AHDC1;AKT1;ANKRD11;APC2;ATRX;BRAF;BUB1B;CASK;CBL;CENPF;CTBP1;CTNND2;DCHS1;DPM1;EFNB1;ELN;FBN1;FGD1;FGFR1;FIG4;FLII;FLNA;FLNB;GJA1;GLI3;GPC3;GRIP1;HRAS;HSD17B4;INPPL1;INSR;JAG1;KAT6B;KMT2A;LEMD3;LRP2;LRP4;LRP5;LRPPRC;LTBP4;MED12;MEGF8;NF1;NOTCH2;NOTCH3;NSD2;PACS1;PAFAH1B1;PEX1;PEX5;PHGDH;PIK3CA;POLR1A;PPP2R1A;PPP2R5D;PTCH1;PTEN;PTPN11;RAI1;RB1;ROR2;RPL35A;RPS19;RUNX2;SEC23A;SEC24D;SETD2;SIN3A;SLC1…
Congenital Epicanthus	5.8831e-06	39	AFF2;ARVCF;ATRX;BAZ1B;BUB1;CASK;CCDC88A;CLIP2;COL4A3BP;CREBBP;CTNND2;DCHS1;EFTUD2;EP300;GTF2I;HSD17B4;KAT6A;KIF11;KIF1A;KMT2A;LONP1;MED12;MEGF8;NBAS;NF1;NOTCH2;NSD2;PEX1;PEX5;PIK3CA;PTCH1;PTPN11;RAB3GAP2;RB1;ROR2;SEC24C;SIN3A;SOS1;ZNF592		Central neuroblastoma	4.75478e-13	284	ABCA1;ABCA2;ABCC4;ACO1;ACTG1;ACTN4;AGTPBP1;AKT1;ANK2;ANXA2;APAF1;APC;AR;ARFGEF2;ARHGAP32;ARHGEF2;ARID1A;ARID1B;ASH1L;ATF4;ATM;ATP7A;ATR;ATRX;AURKA;AURKB;BARD1;BCAR1;BCR;BIRC5;BIRC6;BRAF;BRCA1;BTRC;CALM1;CALM2;CALM3;CALR;CAV1;CCNB1;CCND1;CD44;CDC42;CDC6;CDK2;CDK4;CDK5;CDK9;CDKN1A;CEBPZ;CENPE;CHAF1A;CHEK1;CIC;CNOT1;CNR1;CREB1;CREBBP;CRK;CRMP1;CTNNB1;CUL1;CUL7;DCLK1;DDX1;DHX9;DICER1;DLGAP5;DNER;EFNB…
Fanconi Anemia	5.8831e-06	49	ABCC4;ABL1;ASXL1;ATF7IP;ATM;ATR;BCR;BLM;BRCA1;BRCA2;DCLRE1A;DDB1;EPHB2;ERBB2;FANCD2;FANCI;GOLGA4;HIF1A;INSR;JAK1;LRP2;MCM4;MSH2;MSH3;MSH6;MTOR;NOTCH1;OCRL;PALB2;PARP1;POLD1;PRKDC;PTPRU;RB1;SF3B1;SMARCA4;SPTAN1;SPTBN1;STAT1;TP53BP1;TYRO3;USP1;USP11;WDR48;WDTC1;WNK1;XRCC5;XRCC6;ZEB1		Downward slant of palpebral fissure	4.75478e-13	62	ADNP;AHDC1;AKT1;APC2;ATR;BRAF;CBL;CENPE;CHD7;CREBBP;CTNND2;CUL4B;DPM1;DYNC1H1;EFNB1;EFTUD2;EP300;FBN1;FGD1;FGFR1;FLNA;GJA1;GPC3;HNRNPK;HRAS;KAT6B;KIF11;KMT2A;LRP2;LRP4;MED12;NF1;NOTCH2;NOTCH3;NSD2;PACS1;PAFAH1B1;PCNT;PIK3CA;POLR1A;PPP2R1A;PPP2R5D;PTCH1;PTEN;PTPN11;RAB3GAP2;RAI1;ROR2;RPS19;RPS28;SEC24D;SETD2;SF3B4;SIN3A;SMC1A;SOS1;SOS2;SZT2;TTC37;WASHC5;YWHAE;ZBTB20
Acquired scoliosis	6.74904e-06	55	ALMS1;ARID1A;ATR;BRCA2;CREBBP;CTNND2;CUL4B;DCHS1;EP300;FANCD2;FANCI;FBN1;FBN2;FGD1;FLII;FLNA;FLNB;GARS;HERC2;HSD17B4;HSPG2;IARS2;KAT6B;KIF5A;KMT2D;LONP1;MED12;MFN2;NF1;NOTCH2;NOTCH3;NSD2;OCRL;PCNT;PIK3CA;POLD1;PTCH1;PTPN11;RAB3GAP2;RAI1;ROR2;SBF1;SEC23A;SEC24D;SIN3A;SLC12A6;SMARCA4;SOS1;SOS2;SPAST;STAT3;SYNJ1;UBA1;UBE3A;WASHC5		Fetal Growth Retardation	5.42831e-13	77	AARS;APC;ARID1A;ATP1A1;ATP5A1;ATP7A;ATR;BCR;BLM;BRAF;BUB1B;CDC6;CENPE;CTBP1;CTNND2;CUL7;DKC1;DNMT1;ELN;FGFR1;FIG4;FLNB;FMR1;GLI3;GSTP1;HDAC1;HDAC2;HDAC6;IGF1R;INSR;IRS1;IRS2;JAG1;KIF14;KIF5C;LEMD3;MAPK1;MCM4;MTHFD1;MTOR;MTR;NIN;NIPBL;NOP10;NSD2;OBSL1;ORC1;ORC4;PCNT;PEX5;PHGDH;PIK3R1;PPARG;PTPN11;RAB3GAP2;RAD21;RB1;RBM10;RPS19;SEC24D;SHH;SIN3A;SMAD4;SMARCA2;SMARCA4;SMARCAL1;SMC1A;SMC3;SNRPB;SOD1;T…
Congenital malformation syndrome	6.74904e-06	12	ASXL1;BRCA1;CHD7;CREBBP;EP300;FLNA;HCFC1;KMT2B;KMT2D;MED12;MYH9;SALL1		Leukemogenesis	5.55715e-13	148	ABL1;AFDN;AKT1;AP2A1;APAF1;APC;ASXL1;ATF7IP;ATM;ATR;BCR;BIRC5;BUB1;CALM1;CALM2;CALM3;CASP8AP2;CBX5;CCAR2;CCND1;CD44;CDH1;CDK2;CDK4;CDK9;CDKN1A;CEBPZ;CKS1B;CREB1;CREBBP;CTCF;CTNNA1;CTNNB1;DDR1;DNMT1;EGFR;EIF2AK2;EIF4A2;EIF4E;EIF4G1;EP300;EPHB2;FANCA;FANCC;FANCD2;FAT3;FBXO11;FGFR1;FLII;FMR1;FUS;GNL3;GSK3B;GSN;GSTP1;H2AFX;HDAC1;HDAC2;HIF1A;HLA-A;HLA-C;HMGA1;HNRNPA1;HNRNPK;HSP90AA1;HSPG2;JAG1;JAK1;JA…
Short nose	6.74904e-06	32	ADNP;ATRX;BAZ1B;BLM;CASK;CCDC88A;CLIP2;EFTUD2;FBN1;FGD1;FGFR1;FLII;FLNA;FLNB;GLI3;GTF2I;HDAC6;INPPL1;KIF1A;LONP1;LRP2;NIPBL;PTCH1;RAB3GAP2;RAD21;RAI1;ROR2;SIN3A;SLC12A6;SMC3;UBA1;WASHC5		Acute leukemia	5.57225e-13	109	ABL1;AFDN;AFF2;AKAP12;AKT1;APAF1;ASXL1;ATM;AURKB;BCR;BIRC6;BRCA1;BRCA2;CALM1;CALM2;CALM3;CBL;CDK4;CDK9;CEBPZ;CHEK1;CREB1;CREBBP;DLL1;DNMT1;EHMT2;EIF2AK2;EIF4E;EPHA7;EPHB2;EPS15;EWSR1;FANCD2;FGFR1;FLII;FUS;GSTP1;H2AFX;HDAC9;HLA-A;HLA-C;HNRNPA1;HRAS;HSP90AA1;HSPA4;INSR;JAK1;JAK2;KAT6A;KDM5A;KMT2A;LAMA1;LEF1;MAPK1;MCL1;MDM2;MSH2;MSH3;MYC;MYH9;NCAM1;NCOA2;NCOR1;NF1;NF2;NOTCH1;NPM1;NUP214;NUP98;PAFAH1…
Small nose	6.74904e-06	32	ADNP;ATRX;BAZ1B;BLM;CASK;CCDC88A;CLIP2;EFTUD2;FBN1;FGD1;FGFR1;FLII;FLNA;FLNB;GLI3;GTF2I;HDAC6;INPPL1;KIF1A;LONP1;LRP2;NIPBL;PTCH1;RAB3GAP2;RAD21;RAI1;ROR2;SIN3A;SLC12A6;SMC3;UBA1;WASHC5		Neuroblastoma	5.74553e-13	293	ABCA1;ABCA2;ABCC4;ACO1;ACTG1;ACTN4;AGTPBP1;AKT1;ANK2;ANXA2;APAF1;APC;AR;ARFGEF2;ARHGAP32;ARHGEF2;ARID1A;ARID1B;ASH1L;ATF4;ATM;ATP7A;ATR;ATRX;AURKA;AURKB;BARD1;BCAR1;BCR;BIRC5;BIRC6;BRAF;BRCA1;BTRC;CALM1;CALM2;CALM3;CALR;CAV1;CCNB1;CCND1;CD44;CDC42;CDC6;CDK2;CDK4;CDK5;CDK9;CDKN1A;CEBPZ;CENPE;CHAF1A;CHD6;CHEK1;CIC;CNOT1;CNR1;CREB1;CREBBP;CRK;CRMP1;CTNNB1;CUL1;CUL7;DCLK1;DDX1;DHX9;DICER1;DLGAP5;DNER…
Blepharoptosis	7.21411e-06	46	ACSL3;ACTG1;ADNP;ARVCF;ATRX;BCOR;CHD7;CREBBP;DCHS1;EP300;FASTKD2;FGD1;FGFR1;FLNA;HSPG2;KAT6A;KAT6B;KIF21A;KMT2D;LONP1;LRP4;MED12;NDUFS1;NF1;NIPBL;NOTCH3;NSD2;OPA1;PEX1;PEX5;PLXND1;POLG;PTPN11;RAD21;RB1;REV3L;SEC24C;SLC12A6;SMC3;SOS1;SOS2;SZT2;UBA1;ZFHX4;ZNF423;ZNF592		Small head	7.52337e-13	108	AARS;ANKRD11;AP3B1;ARFGEF2;ARID1A;ATP5A1;ATP7A;ATR;ATRX;BAZ1B;BCOR;BCR;BLM;BRCA2;BUB1;BUB1B;C2CD3;CASK;CDC6;CDK5;CDON;CENPE;CENPF;CLIP2;CLP1;CPT2;CREBBP;CTBP1;CTCF;CTNNB1;CTNND2;DHTKD1;DIAPH1;DKC1;DNA2;DPM1;DYNC1H1;EFNB1;EFTUD2;ELN;EP300;FANCA;FANCC;FANCD2;FANCG;FANCI;FGFR1;FIG4;GJA1;GLI2;GRIP1;GTF2I;HCFC1;HDAC4;IGF1R;KAT6A;KAT6B;KIF11;KIF14;KIF1A;KIF5C;KMT2D;LARS;LEMD3;LRP5;MAPK1;MCM4;MEIS2;MPDU…
Cafe-au-Lait Spots	7.21411e-06	16	ATM;BLM;CREBBP;EP300;FANCD2;GNAS;KIF1B;KMT2D;MED12;MSH2;MSH6;NF1;PCNT;PTPN11;SIN3A;TSC2		Malignant tumor of colon	7.98647e-13	309	ABCA1;ACACA;ACTG1;AFDN;AKT1;ANXA2;APAF1;APC;APC2;APEX1;AR;ARHGEF17;ATM;ATP2B4;ATP7A;ATR;AURKA;AURKB;AXIN1;BARD1;BCAR1;BCL9;BIRC5;BIRC6;BRAF;BRCA1;BRCA2;BUB1;CALR;CASP8AP2;CAV1;CBX5;CCAR1;CCDC88A;CCNB1;CCND1;CD44;CDC42;CDH1;CDH2;CDK2;CDK4;CDK5;CDKN1A;CEBPZ;CFTR;CHAF1A;CHD7;CHEK1;CNR1;CREBBP;CRK;CSE1L;CSNK2A1;CTCF;CTNNA1;CTNNB1;CTNND1;CTTN;CUL3;CYFIP2;DCAF1;DCLK1;DDB1;DDX5;DHX32;DIAPH1;DICER1;DLL1;…
Dwarfism	8.8628e-06	40	ARID1B;ASXL1;BRCA2;CDK5RAP2;CMAS;CUL7;EPHB2;F8;FBN1;FGFR1;FLNB;GLI2;GNAS;HIP1;IGF1R;INPPL1;KDM5C;KMT2B;KMT2D;LEMD3;MAP4;MCM2;MCM4;MTR;NBAS;NBEA;NF1;NIN;ODC1;ORC1;PCNT;PNPLA6;POLD1;PTPN11;RAI1;RB1CC1;ROR2;SIN3A;STAT1;STAT5B		Colorectal Neoplasms	1.29969e-12	207	ABCA1;ABCA3;ABCC4;ABL1;AKT1;APAF1;APC;APC2;APEX1;AR;ARHGEF2;ASCC3;ATM;ATP6V0A1;AURKA;AXIN1;BARD1;BCR;BIRC5;BLM;BRAF;BRCA1;BRCA2;BRD8;BUB1;BUB1B;CALR;CASP8AP2;CAV1;CCNB1;CCND1;CD44;CDC40;CDC42;CDC45;CDH1;CDK4;CDK7;CDKN1A;CFTR;CHEK1;CTBP1;CTNNB1;CTTN;DCLK1;DKC1;DNMT1;EEF1A1;EGF;EGFR;EP300;EPHB2;ERBB2;ESR1;EXTL3;EZR;FANCD2;FANCG;FAT1;FBN2;FEN1;FGFR1;FLNC;FUS;GJA1;GLI3;GNAS;GPX1;GSK3B;GSN;GSTP1;HDAC1…
Smooth philtrum	8.8628e-06	17	ADNP;ANKRD11;AP3B1;BCR;COL4A3BP;FBN1;FLNA;IGF1R;KDM5C;MED12;NOTCH3;PACS1;PIK3CA;PTPRF;RAD21;SEC23A;SIN3A		Hyperactive behavior	1.51302e-12	169	ABCA1;ABL1;ADAR;ADNP;AFF2;AKT1;ANK3;AP2S1;APC;APEX1;AR;ATM;ATR;ATRX;BCR;BLM;BRAF;BRCA1;BRCA2;BUB1B;CALM1;CALM2;CALM3;CAV1;CBL;CCND1;CD44;CDC42;CDH1;CDK2;CDK5;CFTR;CHD2;CHEK1;CKAP2;COPA;CREBBP;CRK;CUL4B;DMXL2;DNMT1;EGF;EGFR;EHMT2;EIF4E;ELFN1;EP300;EPHA3;EPHB2;ERBB2;ESPL1;ESR1;EZR;FASN;FLNA;FLNB;FMR1;GIT1;GJA1;GLDC;GLI3;GNAS;GRB2;GRIA2;GRK2;GSK3B;GSTP1;HERC2;HIF1A;HIST1H1E;HIST1H4A;HIST1H4B;HIST1H4…
Neoplasm Metastasis	1.29345e-05	335	ABCA1;ABCC4;ABL1;ACACA;ACLY;ACTN4;ADAR;AFDN;AHNAK;AKAP12;AP2A1;APAF1;APC;ARHGAP32;ARHGAP35;ARHGEF2;ARID1A;ASAP1;ATAD2;ATF7IP;ATM;BAZ2A;BCAR1;BCL9;BCORL1;BIRC6;BLM;BMS1;BRCA1;BRCA2;BUB1;CAPN1;CAPRIN1;CCAR2;CCDC88A;CDH2;CENPF;CHAF1A;CHD8;CIC;CLCN3;CLSPN;COL4A2;CRMP1;CSE1L;CTNNA1;CTNNAL1;CTNNB1;CTNND1;CTNND2;CUL1;CUL3;DAXX;DDR1;DDX1;DDX46;DDX5;DHX16;DHX32;DIAPH1;DICER1;DLG5;DLGAP5;DNMT1;DOCK1;DOCK11…		Intrauterine retardation	1.58322e-12	62	AARS;ARID1A;ATP5A1;ATP7A;ATR;BCR;BLM;BRAF;BUB1B;CDC6;CENPE;CTBP1;CTNND2;CUL7;DKC1;ELN;FGFR1;FIG4;FLNB;FMR1;GLI3;HDAC6;IGF1R;INSR;JAG1;KIF14;KIF5C;LEMD3;MAPK1;MCM4;NIN;NIPBL;NOP10;NSD2;OBSL1;ORC1;ORC4;PCNT;PEX5;PHGDH;PIK3R1;PTPN11;RAB3GAP2;RAD21;RB1;RBM10;RPS19;SEC24D;SHH;SIN3A;SMAD4;SMARCA2;SMARCA4;SMARCAL1;SMC1A;SMC3;SNRPB;TRIM37;TTC37;WASHC5;XPR1;ZNF592
Short neck	1.29345e-05	32	ARVCF;ATRX;CTNND2;CUL4B;CUL7;FBN2;FGD1;FGFR1;FLNB;GNAS;HSPG2;INPPL1;MED12;MEGF8;NBAS;NF1;NIPBL;NOTCH2;NOTCH3;OBSL1;PHGDH;PTCH1;PTPN11;RAD21;RB1;SEC24C;SMARCAL1;SMC3;SOS1;SOS2;TECPR2;UBA1		Infant, Small for Gestational Age	2.19116e-12	62	AARS;ARID1A;ATP5A1;ATP7A;ATR;BCR;BLM;BRAF;BUB1B;CDC6;CENPE;CTBP1;CTNND2;CUL7;DKC1;ELN;FGFR1;FIG4;FLNB;FMR1;GLI3;HDAC6;IGF1R;INSR;JAG1;KIF14;KIF5C;LEMD3;MAPK1;MCM4;NIN;NIPBL;NOP10;NSD2;OBSL1;ORC1;ORC4;PCNT;PEX5;PHGDH;PIK3R1;PTPN11;RAB3GAP2;RAD21;RB1;RBM10;RPS19;SEC24D;SHH;SIN3A;SMAD4;SMARCA2;SMARCA4;SMARCAL1;SMC1A;SMC3;SNRPB;TRIM37;TTC37;WASHC5;XPR1;ZNF592
Concave bridge of nose	1.29345e-05	40	AGL;AHDC1;ARID1A;ATRX;CHD7;CUL7;FBN1;FGFR1;FLII;FLNA;FLNB;GLI2;GLI3;GNAS;GRIP1;HSD17B4;IARS2;INPPL1;INSR;JAG1;KIF11;LONP1;LRP2;MED12;MEGF8;NF1;NIPBL;PEX1;PEX5;PIK3CA;RAB3GAP2;RAD21;RAI1;ROR2;SMARCA4;SMARCAL1;SMC3;SOS1;TRIM37;WASHC5		Ataxia Telangiectasia	2.70425e-12	99	AKT1;AR;ATM;ATR;AXIN1;BLM;BRAF;BRCA1;BRCA2;CAV1;CCNB1;CCND1;CDK2;CDKN1A;CHAF1A;CHEK1;CLSPN;CRK;CUL5;DLL1;DNER;DOCK3;DYNC2H1;EGF;EGFR;EPHB2;ERBB2;FANCD2;FBXO18;FMR1;FN1;GLI3;GPX1;H2AFX;HDAC1;HDAC4;HIF1A;HIST1H4A;HIST1H4B;HIST1H4C;HIST1H4D;HIST1H4E;HIST1H4H;HIST1H4I;HIST1H4K;HLA-C;IFT172;IRS1;IRS2;KAT2B;LIG3;MAPK1;MAPK14;MCM5;MCM7;MDC1;MDM2;MED1;MTOR;NCAM1;NCOR2;NES;NME1;NOTCH1;PCNA;PIK3CA;PIK3CB;P…
Depressed nasal bridge	1.29345e-05	40	AGL;AHDC1;ARID1A;ATRX;CHD7;CUL7;FBN1;FGFR1;FLII;FLNA;FLNB;GLI2;GLI3;GNAS;GRIP1;HSD17B4;IARS2;INPPL1;INSR;JAG1;KIF11;LONP1;LRP2;MED12;MEGF8;NF1;NIPBL;PEX1;PEX5;PIK3CA;RAB3GAP2;RAD21;RAI1;ROR2;SMARCA4;SMARCAL1;SMC3;SOS1;TRIM37;WASHC5		Herpes Simplex Infections	3.5055e-12	112	AFDN;AKT1;APC;AR;ATM;ATR;ATRX;BRCA2;CALR;CD44;CDKN1A;CPS1;CRK;CTCF;DCAF1;EGF;EGFR;EIF2AK2;EIF4A2;EIF4E;EIF4G1;EIF4G2;EIF4H;EPHA3;ERBB2;ERBIN;ESR1;FANCD2;FASN;FLNB;GEMIN4;GJA1;GLI3;HCFC1;HDAC4;HDAC5;HDAC9;HLA-A;HLA-C;HMGA1;HMGB2;HNRNPC;HSP90AA1;HSPA4;HSPA8;HSPA9;IRS1;KDM1A;KDM4A;KIF23;LEF1;LSM2;MAPK1;MAPK14;MDM2;MTOR;NCL;NES;NGF;NOS2;NPEPPS;NUMA1;NUP214;ODC1;PARG;PCNA;PDZD8;PHGDH;PIK3CA;PIK3CB;PNP…
Depressed nasal root/bridge	1.29345e-05	40	AGL;AHDC1;ARID1A;ATRX;CHD7;CUL7;FBN1;FGFR1;FLII;FLNA;FLNB;GLI2;GLI3;GNAS;GRIP1;HSD17B4;IARS2;INPPL1;INSR;JAG1;KIF11;LONP1;LRP2;MED12;MEGF8;NF1;NIPBL;PEX1;PEX5;PIK3CA;RAB3GAP2;RAD21;RAI1;ROR2;SMARCA4;SMARCAL1;SMC3;SOS1;TRIM37;WASHC5		Multiple Myeloma	3.61018e-12	214	ABCA1;ABL1;AGO2;AKT1;ANXA2;APAF1;APEX1;ASXL1;ATF4;ATM;ATP7A;ATR;AURKA;AURKB;BAG6;BCL9;BCR;BIRC5;BRAF;BRCA1;BTRC;BUB1;CALM1;CALM2;CALM3;CAV1;CCNB1;CCND1;CD44;CDH1;CDH2;CDK2;CDK4;CDK5;CDK9;CDKN1A;CHEK1;CKS1B;CREB1;CREBBP;CRK;CSNK2A1;CTNNB1;DDB1;DDX5;DENND4A;DIS3;DKC1;DNER;DNMT1;EGF;EGFR;EIF2S2;EIF4A2;EIF4E;EIF4G1;ENC1;EP300;EPHB2;ERBB2;ESR1;ETFA;FANCD2;FGFR1;FN1;GJA1;GRB2;GSK3B;GSTP1;H2AFX;HDAC1;HD…
Bilateral fifth finger clinodactyly	1.3837e-05	27	ATR;BAZ1B;BCOR;BCR;BLM;CENPE;CLIP2;CREBBP;CUL4B;CUL7;EP300;FGD1;FLII;FLNB;GTF2I;JAG1;KMT2A;NIPBL;ORC1;PCNT;RAD21;RAI1;RB1;ROR2;SALL1;SMC3;UBE3A		Prostate carcinoma	3.6812e-12	434	ABCA1;ABCA2;ABCC4;ABL1;ACACA;ACLY;ACSL3;AGO2;AKAP12;AKAP13;AKT1;ALAS1;ANXA2;APAF1;APC;APEX1;AR;ARHGAP21;ARHGEF12;ARHGEF2;ARVCF;ASAP1;ATAD2;ATM;ATRIP;AURKA;AURKB;AXIN1;BAZ2A;BCAR1;BIRC5;BIRC6;BLM;BMS1;BRAF;BRCA1;BRCA2;BRD7;BRD8;BTRC;BUB1;BUD13;CAD;CALM1;CALM2;CALM3;CALR;CAND1;CARM1;CAV1;CBX5;CCAR1;CCAR2;CCNB1;CCND1;CD44;CDC42;CDC6;CDH1;CDH2;CDK2;CDK4;CDK5;CDK7;CDK9;CDKN1A;CELSR3;CENPF;CFTR;CHAF1A;…
Curvature of little finger	1.3837e-05	27	ATR;BAZ1B;BCOR;BCR;BLM;CENPE;CLIP2;CREBBP;CUL4B;CUL7;EP300;FGD1;FLII;FLNB;GTF2I;JAG1;KMT2A;NIPBL;ORC1;PCNT;RAD21;RAI1;RB1;ROR2;SALL1;SMC3;UBE3A		Retinoblastoma	3.89817e-12	121	ABL1;AKAP12;AKT1;APC;APEX1;ATM;ATR;BCOR;BCORL1;BIRC5;BRAF;BRCA1;BRCA2;CALM1;CALM2;CALM3;CASK;CAV1;CCNB1;CCND1;CD44;CDK2;CDK4;CDK5;CDKN1A;CHEK1;CTCF;CTNNB1;DDX1;DDX5;DICER1;DNMT1;EGFR;ELN;EP400;EPHB2;ERBB2;ESR1;EWSR1;FASN;FBXW11;FGFR1;H2AFX;HDAC1;HDAC9;HIF1A;HLA-A;HLA-C;HRAS;HSP90AA1;HSPA4;IGF2R;IRS1;KDM4A;KDM5A;KIF13A;KIF14;KMT2D;KRT8;MAPK1;MAPK8;MCL1;MCM2;MDM2;MIB1;MKI67;MLH1;MSH2;MTOR;MTR;MYC;N…
Narrow cranium shape	1.54486e-05	22	APC2;ATRX;BLM;CUL7;FBN1;FBN2;FIG4;GLI3;HERC2;HSD17B4;INPPL1;JAG1;NOTCH2;NOTCH3;NSD2;OBSL1;PEX1;PEX5;PI4KA;SETD2;TRIM37;UBA1		Lymphoma	4.70268e-12	217	ABCA1;ABL1;AKT1;APAF1;APC;ARID1A;ASXL1;ATM;ATR;AURKA;AURKB;BCAR1;BCR;BIRC5;BLM;BRAF;BRCA1;BRCA2;BTRC;BUB1;CALM1;CALM2;CALM3;CBL;CCAR1;CCAR2;CCND1;CD44;CDC42;CDH1;CDK2;CDK4;CDK9;CDKN1A;CHEK1;CKS1B;CLTC;CNR1;CREB1;CREBBP;CRK;CTCF;CTSC;CUL1;DDR1;DHX32;DHX9;DLL1;DNER;DNMT1;DYNC1H1;EEF2;EFNB2;EGF;EGFR;EIF2AK2;EIF4A1;EIF4A2;EIF4E;EIF4G1;EML4;EP300;EPHA7;EPHB2;ERBB2;ESR1;FAU;FBN1;FGFR1;FLII;FLNB;FN1;GCN…
Narrow head shape	1.54486e-05	22	APC2;ATRX;BLM;CUL7;FBN1;FBN2;FIG4;GLI3;HERC2;HSD17B4;INPPL1;JAG1;NOTCH2;NOTCH3;NSD2;OBSL1;PEX1;PEX5;PI4KA;SETD2;TRIM37;UBA1		Acute lymphocytic leukemia	4.91591e-12	161	ABCA1;ABCC4;ABL1;ACTG1;AFF2;AKT1;ANXA2;APAF1;ARID1A;ASPM;ASXL1;ATF4;ATF7IP;ATM;ATR;AURKA;AURKB;BCR;BIRC5;BIRC6;BUB1;CALM1;CALM2;CALM3;CASP8AP2;CBL;CCAR2;CCND1;CD44;CDK2;CDK4;CDKN1A;CHEK1;CKS1B;CKS2;CREB1;CREBBP;CTCF;CTNNB1;CYFIP1;DDR1;DHX32;DLL1;DNER;DNMT1;EFNB1;EGF;EIF2AK2;EIF3A;ELN;EP300;ERBB2;ESR1;EWSR1;EXOSC6;FANCC;FAT1;FGFR1;FLII;FN1;FUS;GLI3;GSTP1;H2AFZ;HDAC1;HDAC2;HDAC3;HDAC4;HDAC5;HDAC9;H…
Narrow skull shape	1.54486e-05	22	APC2;ATRX;BLM;CUL7;FBN1;FBN2;FIG4;GLI3;HERC2;HSD17B4;INPPL1;JAG1;NOTCH2;NOTCH3;NSD2;OBSL1;PEX1;PEX5;PI4KA;SETD2;TRIM37;UBA1		Glioma	4.91591e-12	337	ABCA1;ABL1;ACLY;ADAR;AGO2;AKAP12;AKT1;ANXA2;APAF1;APC;APEX1;ARHGAP35;ARHGEF2;ASH2L;ASPM;ATM;ATR;ATRX;AURKA;AURKB;BCAR1;BIRC5;BIRC6;BRAF;BRCA1;BRCA2;BRD7;BRD8;CADM3;CALM1;CALM2;CALM3;CALR;CAV1;CBL;CCNB1;CCND1;CD44;CDC20;CDC42;CDH1;CDH2;CDK2;CDK4;CDK7;CDKN1A;CENPU;CHAF1A;CHEK1;CIC;CLCN3;CLTC;CNOT1;CNR1;CREB1;CRK;CSE1L;CTCF;CTNNB1;CTNND1;CTNND2;CTR9;DAXX;DCLK1;DDR1;DDX23;DDX46;DDX5;DHX16;DICER1;DLL1…
Turridolichocephaly	1.54486e-05	22	APC2;ATRX;BLM;CUL7;FBN1;FBN2;FIG4;GLI3;HERC2;HSD17B4;INPPL1;JAG1;NOTCH2;NOTCH3;NSD2;OBSL1;PEX1;PEX5;PI4KA;SETD2;TRIM37;UBA1		melanoma	5.19058e-12	375	ABCA1;ACO1;ACTN4;ADAR;AGO2;AKT1;ANXA2;AP2A1;AP3B1;APAF1;APC;APEX1;ARHGAP35;ARHGEF17;ARHGEF2;ARID2;ASAP1;ATM;ATP2C1;ATP7A;ATR;ATRX;AURKA;AURKB;AXIN1;BCAR1;BCR;BIRC5;BIRC6;BLM;BPTF;BRAF;BRCA1;BRCA2;BTRC;BUB1B;CALM1;CALM2;CALM3;CALR;CAPN1;CARM1;CAV1;CCDC88A;CCNB1;CCND1;CD44;CDC42;CDC7;CDH1;CDH2;CDK2;CDK4;CDK9;CDKN1A;CENPE;CEP350;CHEK1;CKS1B;COL4A2;CREB1;CREBBP;CRK;CRMP1;CSE1L;CSNK2A1;CTBP1;CTNNAL1;C…
Birthmark	1.57121e-05	15	ATM;BLM;CREBBP;EP300;FANCD2;KIF1B;KMT2D;MED12;MSH2;MSH6;NF1;PCNT;PTPN11;SIN3A;TSC2		MYELODYSPLASTIC SYNDROME	8.6936e-12	140	ABL1;AKAP12;AKAP13;AKT1;ANXA2;APAF1;APC;ASXL1;ATF7IP;ATM;ATRX;AURKB;BCOR;BCORL1;BCR;BIRC5;CALR;CBL;CCND1;CDC20;CDH1;CDKN1A;CHEK1;CPT2;CREB1;CREBBP;CRK;CTBP1;CTNNA1;DIAPH1;DICER1;DKC1;DLL1;DNMT1;DROSHA;EGF;EIF2AK2;EIF4E;EP300;FANCD2;FANCG;FLII;FRYL;GNAS;GRB2;GSK3B;GSTP1;H2AFX;HDAC9;HLA-C;HNRNPD;HRAS;HSPA4;HSPA9;IGF1R;INTS1;INTS2;IRS2;JAG1;JAK1;JAK2;KDM2B;KMT2A;KMT2C;LEF1;LSM2;MAPK1;MAPK14;MAPK8;MC…
Cognitive delay	1.69831e-05	92	AARS;ADAR;ADNP;AHDC1;ALMS1;ANKRD11;APC2;ARFGEF2;ARID1A;ARVCF;ATRX;BCR;BRCA2;BUB1;CAD;CASK;CHD2;COL4A2;COL4A3BP;CPS1;CTCF;CTNNB1;DHTKD1;EFTUD2;EP300;FANCD2;FANCI;FASTKD2;FGFR1;FLII;FLNA;GLI2;HADHA;HERC2;HSD17B4;HSPD1;INSR;KARS;KAT6A;KAT6B;KIAA0556;KIF1A;KIF5C;KMT2D;LARS;LEMD3;LONP1;LRP2;LRPPRC;LYST;MED12;MTR;MYO5A;NDUFS1;NF1;NSD2;OCRL;OGDH;PACS1;PCNT;PEX1;PEX5;PIK3CA;POGZ;POLG;POLR3A;POLR3B;PPP2R1…		solid tumor	1.15195e-11	153	ABCA1;ABCC4;ABL1;ACO1;AKT1;APC;APEX1;ASXL1;ATF4;ATM;AURKA;AURKB;BCR;BRAF;BRCA1;BRCA2;BUB1;CCND1;CD44;CDH1;CDK2;CDK9;CDKN1A;CHEK1;CLSPN;COL4A2;CSNK2A1;DCLK1;DDX1;DICER1;DNER;DNMT1;EFNB2;EGF;EGFR;EIF2AK2;EIF4E;ELN;EML4;EP300;EPHA3;EPHB2;ERBB2;EWSR1;EZR;FANCA;FANCD2;FASN;FAT1;FGFR1;FLII;FN1;FUS;FXR1;GJA1;GNAS;GSTP1;H2AFX;HDAC2;HDAC9;HIF1A;HK1;HLA-A;HLA-C;HRAS;HSP90AA1;HSPA4;HSPG2;IFT172;IGF1R;IRS1;J…
Mental and motor retardation	1.69831e-05	92	AARS;ADAR;ADNP;AHDC1;ALMS1;ANKRD11;APC2;ARFGEF2;ARID1A;ARVCF;ATRX;BCR;BRCA2;BUB1;CAD;CASK;CHD2;COL4A2;COL4A3BP;CPS1;CTCF;CTNNB1;DHTKD1;EFTUD2;EP300;FANCD2;FANCI;FASTKD2;FGFR1;FLII;FLNA;GLI2;HADHA;HERC2;HSD17B4;HSPD1;INSR;KARS;KAT6A;KAT6B;KIAA0556;KIF1A;KIF5C;KMT2D;LARS;LEMD3;LONP1;LRP2;LRPPRC;LYST;MED12;MTR;MYO5A;NDUFS1;NF1;NSD2;OCRL;OGDH;PACS1;PCNT;PEX1;PEX5;PIK3CA;POGZ;POLG;POLR3A;POLR3B;PPP2R1…		Squamous cell carcinoma	1.3447e-11	294	ABCA1;AKAP12;AKT1;ANXA2;AP2A1;AP2M1;APC;AR;ARHGEF12;ARID1A;ATM;ATR;AURKA;AURKB;AXIN1;BCAR1;BDP1;BIRC5;BLM;BRAF;BRCA1;BRCA2;BUB1B;CALM1;CALM2;CALM3;CALR;CAPN1;CAV1;CCNB1;CCND1;CCT6A;CD44;CDC6;CDC7;CDH1;CDK2;CDK4;CDKN1A;CENPF;CFTR;CHEK1;CKS1B;COL17A1;CPT2;CREB1;CREBBP;CRK;CSNK2A1;CTCF;CTNNA1;CTNNAL1;CTNNB1;CTNND1;CTTN;DKC1;DNMT1;DROSHA;DSP;DST;EFNB2;EGF;EGFR;EIF2AK2;EIF2S2;EIF3A;EIF4B;EIF4E;EIF4G1;…
Joint hyperflexibility	1.70693e-05	23	ARID1A;ATP7A;ATR;CENPE;CUL7;FGD1;FLNB;KAT6B;KMT2D;LONP1;MED12;NOTCH2;OBSL1;OCRL;PCNT;PIK3CA;PTCH1;PTPN11;SIN3A;SMARCA4;SOS1;SOS2;STAT3		Adenoid Cystic Carcinoma	1.69314e-11	63	ARID1A;ASPM;ATM;ATRX;BCOR;BCORL1;BRCA1;BRD1;CCND1;CD44;CDH1;CDK2;CENPF;CREBBP;CTNNB1;EGFR;EP300;EPHB2;ERBB2;ERBIN;ESPL1;FANCA;FAT1;FN1;GPC3;HIF1A;HIST1H1E;HIST1H2AL;HRAS;HSPG2;JAG1;JMJD1C;KAT6A;KMT2C;MAGI1;MAML3;MAPK1;MFN2;MGA;MIB1;MKI67;MORF4L1;MTOR;NCAM1;NGF;NOS2;NOTCH1;NSD1;PCNA;PIK3CA;PRKDC;PTEN;PYGB;SDC1;SETD2;SKP2;SMARCA2;SMC1A;SON;TOP2A;TP53;TXN;VCAN
Decreased projection of midface	1.74872e-05	27	AGL;ATRX;CUL7;DCHS1;EFTUD2;FGFR1;FLII;FLNA;FLNB;GLI2;KAT6B;KIF1A;LRP2;LRPPRC;LTBP4;MEGF8;NF1;OBSL1;PTPN11;RAB3GAP2;RAI1;ROR2;SEC23A;SEC24D;SOS1;SOS2;ZNF592		Micrognathism	1.83408e-11	83	AHDC1;AKT1;ANKRD11;ATP7A;ATR;ATRX;BAZ1B;BRAF;BUB1;BUB1B;CASK;CCT3;CDC6;CDK5;CENPE;CENPF;CLIP2;CREBBP;CTBP1;DCHS1;DNA2;DPM1;EFTUD2;ELN;EP300;FBN1;FGFR1;FIG4;FLII;FLNA;FLNB;GJA1;GTF2I;HRAS;HSD17B4;HSPG2;IGF1R;KAT6B;KDM5C;LRP4;LRP6;LTBP4;MED12;NIPBL;NOTCH2;NOTCH3;NSD2;ORC1;ORC4;PCNT;PEX1;PEX5;PHGDH;PI4KA;PIK3CA;PIK3R1;POLD1;POLR1A;PTEN;PTPN11;RAB3GAP2;RAD21;RAI1;RB1;RBM10;RFC2;ROR2;RPS19;RPS28;RUNX2…
Hypotrophic midface	1.74872e-05	27	AGL;ATRX;CUL7;DCHS1;EFTUD2;FGFR1;FLII;FLNA;FLNB;GLI2;KAT6B;KIF1A;LRP2;LRPPRC;LTBP4;MEGF8;NF1;OBSL1;PTPN11;RAB3GAP2;RAI1;ROR2;SEC23A;SEC24D;SOS1;SOS2;ZNF592		Small cell carcinoma of lung	1.83408e-11	134	ABCA2;ABCC4;ACACA;ACTN4;AKT1;ANXA2;APC;AR;ASH1L;ATM;ATP7A;AURKA;AURKB;BIRC5;BLM;BMS1;BRAF;CALM1;CALM2;CALM3;CAPN1;CAV1;CCND1;CD44;CDH1;CDK2;CDK7;CDKN1A;CHEK1;COL4A2;CREB1;CREBBP;DCLRE1A;DIP2C;DYNC2H1;EEF1A1;EGF;EGFR;EIF4E;EML4;EP300;EPHA7;EPHB2;ERBB2;FBN2;FBXW11;FEN1;FGFR1;FN1;FUS;GSTP1;H2AFX;HDAC9;HIF1A;HLA-A;HLA-C;HRAS;HSP90AA1;IGF1R;JAK2;KAT6B;KIF21A;KMT2A;KRT8;LRP1;MAPK1;MAPK8;MCL1;MGA;MKI67;…
Midface retrusion	1.74872e-05	27	AGL;ATRX;CUL7;DCHS1;EFTUD2;FGFR1;FLII;FLNA;FLNB;GLI2;KAT6B;KIF1A;LRP2;LRPPRC;LTBP4;MEGF8;NF1;OBSL1;PTPN11;RAB3GAP2;RAI1;ROR2;SEC23A;SEC24D;SOS1;SOS2;ZNF592		Congenital chromosomal disease	2.94837e-11	109	ABL1;AKT1;APC;AR;ASXL1;ATM;AURKA;AURKB;BCR;BLM;BRAF;BRCA1;BRCA2;CBL;CCND1;CDH1;CDK2;CDK4;CHD7;CHEK1;DLL1;DOCK1;EGFR;ELN;ERBB2;EWSR1;FANCD2;FANCG;FANCI;FBN2;FGFR1;FMR1;GLI2;GLI3;GSTP1;H2AFX;HDAC4;HLTF;HMGA1;HRAS;IGF1R;INTS1;IRS1;JAK2;KAT6A;KAT6B;KMT2A;KMT2D;LSAMP;MDM2;MED12;MIB1;MKI67;MLH1;MSH2;MSH6;MTOR;MTR;MYC;NCAM1;NCOA2;NCOA3;NF2;NOTCH1;NPM1;NSD2;NUP214;NUP98;PAFAH1B1;PARP1;PBX1;PCNT;PIK3CA;PI…
Small midface	1.74872e-05	27	AGL;ATRX;CUL7;DCHS1;EFTUD2;FGFR1;FLII;FLNA;FLNB;GLI2;KAT6B;KIF1A;LRP2;LRPPRC;LTBP4;MEGF8;NF1;OBSL1;PTPN11;RAB3GAP2;RAI1;ROR2;SEC23A;SEC24D;SOS1;SOS2;ZNF592		Bladder Neoplasm	3.1742e-11	200	AGL;AGO2;AKT1;ANKFY1;APAF1;APC;APEX1;AR;ARID1A;ASAP1;ATG2B;ATM;ATR;AURKA;BCAR1;BIRC5;BLM;BPTF;BRAF;BRCA1;BUB1;CALR;CAV1;CCAR2;CCNB1;CCND1;CD44;CDC20;CDH1;CDH2;CDK2;CDK4;CDKN1A;CFTR;CHD6;CHEK1;CREB1;CREBBP;CTCF;CTNNA1;CTNNB1;CTSC;CTTN;CUL3;DICER1;DLG5;DNMT1;DROSHA;EGF;EGFR;EIF3B;EIF4G2;EOMES;EP300;ERBB2;ESPL1;ESR1;FANCA;FGFR1;FLNA;FN1;FYN;GAS1;GAS5;GEMIN4;GJA1;GLI2;GNAS;GNL3;GPX1;GRB2;GSK3B;GSN;GS…
Long narrow head	1.74872e-05	22	APC2;ATRX;BLM;CUL7;FBN1;FBN2;FIG4;GLI3;HERC2;HSD17B4;INPPL1;JAG1;NOTCH2;NOTCH3;NSD2;OBSL1;PEX1;PEX5;PI4KA;SETD2;TRIM37;UBA1		Malignant neoplasm of urinary bladder	3.34614e-11	229	ABCA1;ABCC4;AGL;AGO2;AKT1;APAF1;APC;APEX1;AR;ARVCF;ATG2B;ATM;ATR;AURKA;BARD1;BCR;BIRC5;BLM;BRAF;BRCA1;BRCA2;CALR;CAV1;CCAR2;CCNB1;CCND1;CD44;CDC20;CDH1;CDH2;CDK2;CDK4;CDK5;CDK7;CDKN1A;CFTR;CHAF1A;CHEK1;CREB1;CSTF1;CTCF;CTNNB1;CTSC;CTTN;CUL3;DICER1;DLG5;DNA2;DNMT1;DROSHA;EGF;EGFR;EIF3A;EIF3B;EIF4G2;EOMES;ERBB2;ESR1;EZR;FANCA;FANCC;FANCD2;FANCG;FGFR1;FLNA;FN1;FYN;GAS1;GAS5;GEMIN4;GJA1;GLI2;GNAS;GNL…
Feeding difficulties in infancy	1.74872e-05	37	APC2;ARID1A;ATP7A;CCDC88A;CPT2;CREBBP;EFTUD2;EP300;FLII;FLNA;HSD17B4;HSPD1;INSR;KAT6B;KIAA0556;KIF1A;KMT2D;MTR;NDUFS1;NIPBL;OCRL;ORC1;PEX1;PEX5;PLXND1;PTPN11;RAB3GAP2;RAD21;RAI1;REV3L;SETD2;SIN3A;SMARCA4;SMC3;SOS1;SOS2;UBE3A		Adenomatous Polyposis Coli	3.34614e-11	97	AKT1;AMER1;APC;APC2;APEX1;AR;ARHGEF2;ATM;AXIN1;BLM;BRAF;BRCA1;BRCA2;BTRC;CALR;CAV1;CCNB1;CCND1;CD44;CDH1;CDK4;CDKN1A;CHEK1;CLASP2;CTBP1;CTNNB1;CTNND1;DNMT1;EGFR;EPHB2;ERBB2;ESR1;FBXW11;FEN1;FOCAD;GSK3B;GSN;GSTP1;H2AFX;HDAC2;HIF1A;HLA-A;HLA-C;HLTF;HSP90AA1;IQGAP1;IRS2;KIF3A;LEF1;LRP5;MAPRE1;MIB1;MKI67;MLH1;MSH2;MSH3;MSH6;MTOR;MYC;NES;NF1;NGF;NME1;NOS2;NUP214;ODC1;PAFAH1B1;PALB2;PARP1;PCNA;PHGDH;PI…
Decreased projection of maxilla	1.84754e-05	20	CREBBP;DCHS1;EFTUD2;EP300;FBN1;FGD1;FGFR1;FLNB;GLI2;KDM5C;LRP6;MED12;ORC1;PIK3CA;POLR1A;PTCH1;RAB3GAP2;SEC23A;SLC12A6;UBE3A		Mandibular hypoplasia	3.84046e-11	82	AHDC1;AKT1;ANKRD11;ATP7A;ATR;ATRX;BAZ1B;BRAF;BUB1;BUB1B;CASK;CCND1;CDC6;CDK5;CENPE;CENPF;CLIP2;CREBBP;CTBP1;DCHS1;DNA2;DPM1;EFTUD2;ELN;EP300;FBN1;FGFR1;FIG4;FLII;FLNA;FLNB;GJA1;GTF2I;HRAS;HSD17B4;HSPG2;KAT6B;KDM5C;LRP4;LRP6;LTBP4;MED12;NIPBL;NOTCH2;NOTCH3;NSD2;ORC1;ORC4;PCNT;PEX1;PEX5;PHGDH;PI4KA;PIK3CA;PIK3R1;POLD1;POLR1A;PTEN;PTPN11;RAB3GAP2;RAD21;RAI1;RB1;RBM10;RFC2;ROR2;RPS19;RPS28;RUNX2;SEC2…
Deficiency of upper jaw bones	1.84754e-05	20	CREBBP;DCHS1;EFTUD2;EP300;FBN1;FGD1;FGFR1;FLNB;GLI2;KDM5C;LRP6;MED12;ORC1;PIK3CA;POLR1A;PTCH1;RAB3GAP2;SEC23A;SLC12A6;UBE3A		Ovarian Carcinoma	4.30614e-11	321	ABCA1;ABCA2;ABL1;ACACA;ACTN4;AFDN;AGO2;AKAP12;AKAP13;AKT1;ANXA2;APAF1;APC;APC2;APEX1;AR;ARID1A;ASPM;ATM;ATP7A;ATR;AURKA;AURKB;BARD1;BCAR1;BCL9;BIRC5;BLM;BRAF;BRCA1;BRCA2;BRD7;BUB1B;CABIN1;CALM1;CALM2;CALM3;CALR;CARM1;CAV1;CCNB1;CCND1;CD44;CDC42;CDC7;CDH1;CDK12;CDK2;CDK4;CDK5;CDK7;CDKN1A;CHAF1A;CHD4;CHEK1;CLSPN;COL4A3BP;CREB1;CREBBP;CRK;CSE1L;CTCF;CTNNB1;CTNND1;CTNND2;CTR9;CTTN;CUL3;CYFIP2;DAXX;DC…
Hypoplasia of the maxilla	1.84754e-05	20	CREBBP;DCHS1;EFTUD2;EP300;FBN1;FGD1;FGFR1;FLNB;GLI2;KDM5C;LRP6;MED12;ORC1;PIK3CA;POLR1A;PTCH1;RAB3GAP2;SEC23A;SLC12A6;UBE3A		Pancreatic Ductal Adenocarcinoma	4.3744e-11	132	AKAP12;AKT1;ANXA2;AP2A1;APC;APEX1;ARID1A;ASPM;ATM;ATR;AURKA;BRAF;BRCA1;BRCA2;CAV1;CCAR2;CCND1;CD44;CDC20;CDC42;CDH1;CDK4;CDKN1A;CFTR;CHD7;CNR1;CREBBP;CRK;CTNND1;DCLK1;DDR1;DHX58;DLG5;DNER;DNMT1;DPYSL3;EGF;EGFR;EIF4E;EML1;EPHB2;ERBB2;FASN;FGFR1;FN1;GLI2;GNAS;GSTP1;HDAC1;HDAC2;HEATR1;HIF1A;HNRNPA2B1;IGF1R;ILF2;KDM2B;KMT2C;LONP1;MALAT1;MAML3;MAP1S;MAPK1;MAPK14;MDM2;MLH1;MSH3;MTA2;MTOR;MYC;MYO10;NCL;…
Hypotrophic maxilla	1.84754e-05	20	CREBBP;DCHS1;EFTUD2;EP300;FBN1;FGD1;FGFR1;FLNB;GLI2;KDM5C;LRP6;MED12;ORC1;PIK3CA;POLR1A;PTCH1;RAB3GAP2;SEC23A;SLC12A6;UBE3A		Prostatic Neoplasms	4.48712e-11	256	ABCC4;ACLY;ACSL3;ADAMTS9;AKAP12;AKT1;ANXA2;APC;APEX1;AR;ASAP1;ATAD2;ATM;ATR;AURKA;BAZ1B;BAZ2A;BCAR1;BIRC5;BRAF;BRCA1;BRCA2;BTRC;CACNA1H;CAD;CALM1;CALM2;CALM3;CALR;CAPN1;CARM1;CAV1;CBL;CCNB1;CCND1;CD44;CDC6;CDH1;CDH2;CDK2;CDK5;CDKN1A;CFTR;CHAF1A;CHEK1;CKS1B;CKS2;CNN3;CNR1;CREB1;CREB5;CREBBP;CRK;CSNK2A1;CTBP1;CTCF;CTNNB1;CTNND1;CTNND2;DAXX;DDR1;DDX5;DNMT1;EEF1A1;EGF;EGFR;EHBP1;EIF2AK2;EIF3A;EP300;E…
Maxillary retrognathia	1.84754e-05	20	CREBBP;DCHS1;EFTUD2;EP300;FBN1;FGD1;FGFR1;FLNB;GLI2;KDM5C;LRP6;MED12;ORC1;PIK3CA;POLR1A;PTCH1;RAB3GAP2;SEC23A;SLC12A6;UBE3A		Mental Retardation	6.18082e-11	187	ABCA1;ADNP;AFF2;AHDC1;AKT1;ANK3;ANKRD11;APC;APC2;AR;ARFGEF2;ARID1A;ASPM;ATP5E;ATP7A;ATR;ATRX;BAZ1B;BCOR;BCR;BRAF;BRCA2;BUB1;BUB1B;C2CD3;CASK;CAV1;CC2D2A;CDC42;CDC42BPA;CDK5;CDK5RAP2;CENPE;CHD2;CHD7;CLIP2;COL4A3BP;CPS1;CREBBP;CTCF;CTNNB1;CTNND2;CUL4B;DCHS1;DICER1;DIP2B;DKC1;DMXL2;DNA2;DOPEY2;DYNC1H1;EFNB1;EFTUD2;ELN;EP300;FANCA;FANCC;FANCD2;FANCG;FANCI;FASTKD2;FGD1;FGFR1;FLII;FLNA;FLNB;FMR1;FUS;FX…
Retrusion of upper jaw bones	1.84754e-05	20	CREBBP;DCHS1;EFTUD2;EP300;FBN1;FGD1;FGFR1;FLNB;GLI2;KDM5C;LRP6;MED12;ORC1;PIK3CA;POLR1A;PTCH1;RAB3GAP2;SEC23A;SLC12A6;UBE3A		Hypoplastic mandible condyle	6.42633e-11	81	AHDC1;AKT1;ANKRD11;ATP7A;ATR;ATRX;BAZ1B;BRAF;BUB1;BUB1B;CASK;CDC6;CDK5;CENPE;CENPF;CLIP2;CREBBP;CTBP1;DCHS1;DNA2;DPM1;EFTUD2;ELN;EP300;FBN1;FGFR1;FIG4;FLII;FLNA;FLNB;GJA1;GTF2I;HRAS;HSD17B4;HSPG2;KAT6B;KDM5C;LRP4;LRP6;LTBP4;MED12;NIPBL;NOTCH2;NOTCH3;NSD2;ORC1;ORC4;PCNT;PEX1;PEX5;PHGDH;PI4KA;PIK3CA;PIK3R1;POLD1;POLR1A;PTEN;PTPN11;RAB3GAP2;RAD21;RAI1;RB1;RBM10;RFC2;ROR2;RPS19;RPS28;RUNX2;SEC24D;SER…
Large auricle	1.879e-05	24	ANKRD11;APC2;BAZ1B;CASK;CLIP2;FLNA;GLI2;GTF2I;INSR;JAG1;KDM5C;KIF1A;KMT2D;PACS1;PHGDH;PIK3R1;POLR1A;PTCH1;RAB3GAP2;SALL1;SETD2;SIN3A;SLC12A6;ZNF592		Malignant neoplasm of esophagus	6.80052e-11	124	ABL1;ADAMTS9;AGO2;AKAP12;AKT1;ANXA2;APC;AR;ATM;AURKA;BAG6;BIRC5;BRCA1;BRCA2;BUB1B;CALR;CCNB1;CCND1;CDC20;CDC42;CDH1;CDK2;CDK4;CDKN1A;CNR1;CRK;CTNNB1;CTTN;DCLK1;DICER1;DNMT1;DROSHA;EGF;EGFR;EIF2AK2;EIF4E;ERBB2;EZR;FAT4;FBXL19;FGFR1;FN1;GEMIN4;GJA1;GNAS;GSK3B;GSN;GSTP1;H2AFX;HIF1A;HLA-A;HLA-C;HLTF;HRAS;HSPG2;IGF1R;INTS2;JAK1;JAK2;LATS2;LEF1;LIG3;LLGL1;LRP1;LTBP4;MAGED1;MALAT1;MAPK1;MAPK14;MCM5;MDC1…
Large dysplastic ears	1.879e-05	24	ANKRD11;APC2;BAZ1B;CASK;CLIP2;FLNA;GLI2;GTF2I;INSR;JAG1;KDM5C;KIF1A;KMT2D;PACS1;PHGDH;PIK3R1;POLR1A;PTCH1;RAB3GAP2;SALL1;SETD2;SIN3A;SLC12A6;ZNF592		Malignant neoplasm of liver	8.71439e-11	135	AKT1;APEX1;ARID2;ATAD2;ATF4;AURKA;AXIN1;BIRC5;CALM1;CALM2;CALM3;CAV1;CBX5;CCNB1;CCND1;CD44;CDH1;CDK2;CDK4;CHD4;CKS1B;CPS1;CREB1;CSE1L;CTCF;CTNNB1;CTTN;CUL3;DNMT1;EGF;EGFR;EIF2S2;EIF4E;EPHA3;EPHB2;ERBB2;ESR1;FASN;FN1;GEMIN4;GJA1;GNAS;GNL3;GPC3;GRK2;GSTP1;GTF2I;HCFC1;HDAC1;HDAC2;HDAC3;HDAC6;HIF1A;HLA-A;HNRNPA1;HNRNPA2B1;HNRNPC;HRAS;HSD17B4;HSP90AA1;HSPA9;HSPG2;IGF1R;IGF2BP1;IGF2R;KIF18A;KMT2A;MALAT…
Large pinnae	1.879e-05	24	ANKRD11;APC2;BAZ1B;CASK;CLIP2;FLNA;GLI2;GTF2I;INSR;JAG1;KDM5C;KIF1A;KMT2D;PACS1;PHGDH;PIK3R1;POLR1A;PTCH1;RAB3GAP2;SALL1;SETD2;SIN3A;SLC12A6;ZNF592		Malignant neoplasm of ovary	8.71439e-11	315	ABCA1;ABL1;ACACA;ACTN4;AGO2;AKAP12;AKT1;ANXA2;APAF1;APC;APC2;APEX1;AR;ARID1A;ASPM;ATM;ATP7A;ATR;AURKA;AURKB;BARD1;BCL9;BCR;BIRC5;BLM;BRAF;BRCA1;BRCA2;BRD7;BUB1;BUB1B;CABIN1;CALM1;CALM2;CALM3;CARM1;CAV1;CCNB1;CCND1;CD44;CDC20;CDC42;CDC7;CDH1;CDK12;CDK2;CDK4;CDK5;CDK7;CDKN1A;CHAF1A;CHD4;CHEK1;COL4A3BP;CREB1;CREBBP;CRK;CSE1L;CTCF;CTNNB1;CTNND1;CTNND2;CTTN;CUL1;CUL3;CYFIP2;DAXX;DCAF1;DDB1;DDR1;DDX1;D…
Large prominent ears	1.879e-05	24	ANKRD11;APC2;BAZ1B;CASK;CLIP2;FLNA;GLI2;GTF2I;INSR;JAG1;KDM5C;KIF1A;KMT2D;PACS1;PHGDH;PIK3R1;POLR1A;PTCH1;RAB3GAP2;SALL1;SETD2;SIN3A;SLC12A6;ZNF592		Myeloid Leukemia	1.11999e-10	111	ABL1;AFDN;AGO2;AKT1;ANXA2;APAF1;APEX1;ASXL1;ATG2B;ATM;BCR;BIRC5;C12orf57;CALM1;CALM2;CALM3;CCND1;CD44;CDC7;CDKN1A;CHEK1;CREB1;CSDE1;CTCF;DDR1;DDX27;DLL1;EIF4G2;EPHA3;EPHB2;EPS15;ESR1;FANCA;FANCC;FANCD2;FANCG;FBXW11;FLNA;FLNB;FN1;FUS;GLI3;GSTP1;HDAC1;HDAC2;HDAC9;HIF1A;HLA-A;HLA-C;HSP90AA1;HSPA9;JAG1;JAK1;JAK2;JUN;KDM3B;KMT2A;MAPK1;MAPK8;MCL1;MDM2;MN1;MPRIP;MYC;NCAM1;NGF;NME1;NPM1;NUP214;NUP98;ODC1…
Large protruding ears	1.879e-05	24	ANKRD11;APC2;BAZ1B;CASK;CLIP2;FLNA;GLI2;GTF2I;INSR;JAG1;KDM5C;KIF1A;KMT2D;PACS1;PHGDH;PIK3R1;POLR1A;PTCH1;RAB3GAP2;SALL1;SETD2;SIN3A;SLC12A6;ZNF592		Precancerous Conditions	1.24246e-10	98	ABL1;AGO2;AKAP12;AKT1;APC;APEX1;ATM;ATP5B;AURKA;AXIN1;BARD1;BIRC5;BRAF;BRCA1;BRCA2;CAV1;CCND1;CD44;CDH1;CDK2;CDK4;CDKN1A;CHEK1;CPS1;CTNNB1;CTNND1;CTTN;DCLK1;DDR1;DDX54;DICER1;DNMT1;EFNB2;EGF;EGFR;EIF3E;EIF4E;EPHB2;ERBB2;ESR1;FASN;GSTP1;HDAC1;HIF1A;HLA-C;HRAS;IGF1R;IGF2R;IRS1;KIF1A;KRT8;LEF1;MAPK8;MCL1;MDM2;MIB1;MKI67;MLH1;MSH2;MSH6;MYC;NME1;NOTCH1;NOTCH2;NOTCH3;NUP155;ODC1;PAK1;PARP1;PCNA;PHB;PIK…
Large, floppy ears	1.879e-05	24	ANKRD11;APC2;BAZ1B;CASK;CLIP2;FLNA;GLI2;GTF2I;INSR;JAG1;KDM5C;KIF1A;KMT2D;PACS1;PHGDH;PIK3R1;POLR1A;PTCH1;RAB3GAP2;SALL1;SETD2;SIN3A;SLC12A6;ZNF592		Long philtrum	1.2852e-10	50	ACTG1;ANKRD11;AP3B1;ARVCF;ATP7A;BAZ1B;BCOR;BRAF;BUB1B;CASK;CBL;CDC6;CLIP2;CTNNB1;CUL7;ELN;FBN1;FGD1;FGFR1;GJA1;GTF2I;HSD17B4;IARS2;IGF1R;INPPL1;KAT6B;KIF11;KMT2A;LTBP4;MED12;NBAS;NIPBL;NOTCH2;NOTCH3;OBSL1;PCLO;PTCH1;PTEN;RAD21;RFC2;ROR2;SEC23A;SEC24C;SIN3A;SMARCA2;SMC1A;SMC3;SNRPB;TTC37;UBA1
Macrotia	1.879e-05	24	ANKRD11;APC2;BAZ1B;CASK;CLIP2;FLNA;GLI2;GTF2I;INSR;JAG1;KDM5C;KIF1A;KMT2D;PACS1;PHGDH;PIK3R1;POLR1A;PTCH1;RAB3GAP2;SALL1;SETD2;SIN3A;SLC12A6;ZNF592		Liver and Intrahepatic Biliary Tract Carcinoma	1.67215e-10	119	AKT1;APEX1;ARID2;ATAD2;ATF4;AURKA;BIRC5;CALM1;CALM2;CALM3;CAV1;CBX5;CCNB1;CCND1;CD44;CDH1;CDK2;CHD4;CKS1B;CPS1;CREB1;CSE1L;CTCF;CTNNB1;CTTN;DNMT1;EGF;EGFR;EIF2S2;EIF4E;EPHB2;ERBB2;ESR1;FASN;FN1;GEMIN4;GNL3;GPC3;GRK2;GTF2I;HCFC1;HDAC1;HDAC2;HDAC3;HDAC6;HIF1A;HLA-A;HNRNPA1;HNRNPA2B1;HNRNPC;HRAS;HSD17B4;HSPA9;HSPG2;IGF1R;IGF2BP1;IGF2R;KIF18A;KMT2A;MALAT1;MAP1S;MAPK1;MAPK8;MCL1;MDM2;MLH1;MTOR;MTR;MYC…
Anteverted nostril	1.93568e-05	39	ANKRD11;APC2;ATRX;COL4A3BP;CUL7;EFTUD2;FBN1;FGD1;FGFR1;FIG4;FLII;GLI3;IFT140;IFT172;INPPL1;KIF11;KIF1A;LONP1;LRPPRC;MEGF8;NIPBL;NOTCH2;OBSL1;PEX1;PEX5;PPP2R1A;PRPF6;PRPF8;RAB3GAP2;RAD21;RAI1;RBM10;ROR2;SEC23A;SETD2;SIN3A;SMC3;SNRNP200;TTC37		Traditional Serrated Adenoma	1.88147e-10	45	APC;AR;BRAF;CALR;CBX5;CCND1;CDK2;CDKN1A;CFTR;CREBBP;CTCF;EGFR;EIF4E;EPHB2;FN1;GSTP1;HDAC1;HDAC2;HDAC3;HIST1H4A;HIST1H4B;HIST1H4C;HIST1H4D;HIST1H4E;HIST1H4H;HIST1H4I;HIST1H4K;JUN;MAPK8;MCM2;MCM7;MLH1;NSD1;PCNA;PIK3CA;PLK2;PTCH1;PTPRD;RAD9A;ROCK1;SP1;SRC;TP53;VDR;VIM
Acquired flat foot	2.39006e-05	22	ALMS1;ATP7A;ATR;ATRX;BAZ1B;BCR;CLIP2;CREBBP;CUL4B;CUL7;EP300;FBN1;FLII;FLNA;FLNB;GTF2I;HSPG2;PACS1;RAI1;SALL1;SBF1;SEC23A		Cryptorchidism	2.20548e-10	83	ANKRD11;AR;ARID1A;ATP2B1;ATR;ATRX;BCOR;BLM;BRAF;BUB1B;CBL;CD44;CDC6;CFTR;CHD7;CLP1;CREBBP;CTCF;CUL4B;DKC1;EFNB1;EP300;ESR1;FANCA;FANCC;FANCD2;FGD1;FGFR1;FIG4;FLNA;FLNB;FMR1;GLI2;GLI3;GPC3;GRIP1;HNRNPK;HRAS;HSPG2;INPPL1;JAG1;KAT6B;KDM5A;KDM5C;KMT2D;MAP3K1;MED12;MEGF8;NF1;NIPBL;NOTCH2;NOTCH3;NSD2;NUMA1;OCRL;ORC1;OTX2;PACS1;PEX1;PEX5;PHGDH;PNPLA6;POLA1;POLD1;POLR3B;PTPN11;RAB3GAP2;RAD21;ROR2;SALL1;S…
Flatfoot	2.39006e-05	22	ALMS1;ATP7A;ATR;ATRX;BAZ1B;BCR;CLIP2;CREBBP;CUL4B;CUL7;EP300;FBN1;FLII;FLNA;FLNB;GTF2I;HSPG2;PACS1;RAI1;SALL1;SBF1;SEC23A		Carcinoma of bladder	2.40442e-10	186	ABCA1;AGL;AGO2;AKT1;APAF1;APC;APEX1;AR;ATG2B;ATM;ATP7A;ATR;AURKA;BIRC5;BLM;BRAF;BRCA1;CALR;CAV1;CCAR2;CCNB1;CCND1;CD44;CDC20;CDH1;CDH2;CDK2;CDK4;CDKN1A;CFTR;CHAF1A;CHEK1;CREB1;CTCF;CTNNB1;CTSC;CTTN;CUL3;DICER1;DLG5;DNMT1;DROSHA;EGF;EGFR;EIF3A;EIF3B;EIF4G2;EOMES;ERBB2;ESR1;FANCA;FBXW11;FGFR1;FLNA;FN1;FYN;GAS1;GAS5;GEMIN4;GJA1;GLI2;GNAS;GNL3;GPX1;GRB2;GSK3B;GSN;GSTP1;HDAC2;HDAC4;HDAC9;HIF1A;HLA-C;H…
Brachydactyly	2.58933e-05	29	ACSL3;ATRX;FBN1;FGD1;FLII;FLNA;FLNB;GNAS;IFT140;IFT172;INPPL1;INSR;JAG1;KAT6B;KDM5C;LONP1;MEGF8;NBAS;NOTCH1;NOTCH2;PCNT;PLXND1;PTCH1;PTPN11;RAI1;RB1;REV3L;ROR2;SIN3A		Aplasia Cutis Congenita	2.56019e-10	53	ACACA;AKT1;AMER1;APC;ATM;BARD1;BMS1;BRCA1;CAD;CCNB1;CCND1;CDK2;COL17A1;CREBBP;CTNNB1;CTTN;DICER1;EGFR;ERBB2;ESR1;GAS5;GSTP1;IGF1R;ITGA6;JAG1;JUN;LONP1;MALAT1;MAPK8;MMRN1;MTOR;NOTCH1;NR3C1;NUMA1;PCNA;PIK3CA;PIK3CB;PLEC;PPARG;PROM1;PTTG1;RPS6KB1;RRM1;SKP2;SMAD4;SMARCA2;SPEN;SPHK1;STAT3;TOP2A;TP53;VCAN;VIM
FANCONI ANEMIA, COMPLEMENTATION GROUP A (disorder)	3.68373e-05	42	ABL1;ASXL1;ATF7IP;ATM;ATR;BCR;BLM;BRCA1;BRCA2;DCLRE1A;EPHB2;ERBB2;FANCD2;FANCI;GOLGA4;HIF1A;INSR;JAK1;MSH2;MSH3;MSH6;MTOR;NOTCH1;PALB2;PARP1;POLD1;PTPRU;RB1;SF3B1;SMARCA4;SPTBN1;STAT1;TP53BP1;TYRO3;USP1;USP11;WDR48;WDTC1;WNK1;XRCC5;XRCC6;ZEB1		Sarcoma	5.27077e-10	136	ABL1;ACACA;AKT1;AMER1;ANXA2;APAF1;APC;AR;ATM;ATRX;AURKA;AURKB;AXIN1;BCOR;BIRC5;BMS1;BRAF;BRCA1;BUB1;CALM1;CALM2;CALM3;CAV1;CCAR2;CCND1;CD44;CDK2;CDK4;CDKN1A;CIC;CMAS;CREB1;CRK;CTNNB1;CYFIP2;DICER1;EGF;EGFR;EIF2AK4;EPHB2;ERBB2;ESPL1;ESR1;EWSR1;EXTL3;EZR;FAU;FBXW11;FGFR1;FLII;FN1;FUS;GPC3;GSTP1;HDAC4;HIF1A;HRAS;HSP90AA1;IGF1R;IGF2BP1;IRS2;JUN;KAT6A;LATS2;LCK;MAML3;MAPK1;MAPK14;MCL1;MDM2;MGEA5;MIB1;…
aggressive cancer	4.31484e-05	18	ACACA;ATAD2;BMS1;EWSR1;FASN;HIF1A;IGF1R;IGF2BP1;MYO10;NOS2;NOTCH1;ODC1;PHGDH;PIK3CA;PIK3CB;SETD2;XRCC5;ZEB1		Skin Neoplasms	5.4406e-10	79	ACO1;AKT1;AP3B1;APC;APEX1;ATM;AURKA;BRAF;BRCA1;BRCA2;CCND1;CD44;CDK4;CNR1;CSNK2A1;CTNNB1;DICER1;EGF;EGFR;ERBB2;FANCD2;GJA1;GLI2;GNAS;GPX1;GSTP1;HDAC6;HERC2;HIF1A;HLA-A;HLA-C;HNRNPK;HRAS;HSPG2;IGF1R;KLC1;KLHL9;KRT8;LONP1;LRIG1;MAPK14;MDM2;MLH1;MSH2;MSH6;MTOR;MYO5A;NCAM1;NF2;NOTCH1;NOTCH3;NPM1;OCRL;ODC1;PARP1;PCNA;PIK3CA;PTCH1;PTEN;RAC1;RARA;RELA;RPA1;SDC1;SEM1;SHH;SIRT1;SMAD2;SP1;STAT3;TERF2;TIAM1…
Ventricular Septal Defects	5.03486e-05	33	ARVCF;BCOR;CHD7;CREBBP;EP300;FBN1;FBN2;FIG4;FLNB;FN1;GLI3;IGF1R;JAG1;KAT6A;KAT6B;KMT2D;LONP1;LRP5;MED12;NIPBL;NSD2;PEX1;PHGDH;PIK3CA;PTPN11;ROR2;RTN4;SALL1;SALL4;SEC24C;SOS1;TSHZ1;WASHC5		Refractory cancer	6.54435e-10	53	ABL1;AKT1;AR;ASXL1;ATF4;AURKB;BCR;BIRC5;BRCA2;CD44;CDK5;CDK9;EGFR;EPHB2;ERBB2;ESR1;GMNN;HIF1A;HIST1H4A;HIST1H4B;HIST1H4C;HIST1H4D;HIST1H4E;HIST1H4H;HIST1H4I;HIST1H4K;KDM5B;MAPK1;MCL1;MSH3;MTOR;NBR1;NCOA1;NOTCH1;NR3C1;PARP1;PHB;PIK3CA;PIK3CB;PIK3R1;PPIA;PPP1R12C;PTEN;RAD18;RARA;SIRT1;SPHK1;SRC;STAT3;TBC1D9;TP53;XAB2;YBX1
Acute leukemia	5.11886e-05	63	ABL1;AFDN;AFF2;AKAP12;APAF1;ASXL1;ATM;BCR;BIRC6;BRCA1;BRCA2;CEBPZ;CREBBP;DNMT1;EHMT2;EPHA7;EPHB2;EWSR1;FANCD2;FGFR1;FLII;FUS;HSPA4;INSR;JAK1;KAT6A;KDM5A;KMT2A;LAMA1;MSH2;MSH3;MYH9;NCOA2;NCOR1;NF1;NF2;NOTCH1;NUP214;NUP98;PCM1;PIK3CA;PIK3CB;PTPN11;RALGAPB;RB1;SETD1A;SETD2;SF3B1;SLU7;SMARCA1;SMARCA5;SORL1;SRRM2;STAT1;STAT3;STAT5B;TAF15;TBC1D9;TOP2A;TP53BP2;TSC2;ZBTB16;ZNF423		Osteosarcoma	8.28863e-10	172	ABCA1;AKT1;AMBN;ANXA2;APAF1;APC;APEX1;ARHGAP35;ATF4;ATM;ATR;ATRX;AURKA;AURKB;BAG6;BCOR;BIRC5;BRCA2;BRD7;CALM1;CALM2;CALM3;CAPRIN1;CAV1;CCNB1;CCND1;CD44;CDC20;CDC5L;CDH2;CDK4;CDK5;CDKN1A;CHEK1;CNOT1;CREB1;CTCF;CTNNB1;EFNB1;EGF;EGFR;EIF2AK2;EIF3A;EPHB2;ERBB2;ESPL1;ESR1;EWSR1;EZR;FAU;FBN1;FBXW11;FGFR1;FN1;FTL;GLI2;GLI3;GNAS;GNL3;GSK3B;GSN;GSTP1;H2AFX;HDAC1;HDAC5;HDAC9;HIF1A;HMGA1;HRAS;HSP90AA1;HSPA4…
Postnatal growth retardation	5.68778e-05	18	ATR;ATRX;BLM;CASK;CHD7;CREBBP;CUL7;DMXL2;EP300;FLNA;INSR;KMT2D;MCM4;NBAS;PCNT;PTPN11;RAB3GAP2;SEC24D		Meningioma	8.96976e-10	99	AKT1;AP1B1;AP2B1;APC;APEX1;AR;ATM;BCR;BIRC5;BRCA1;BRCA2;CALM1;CALM2;CALM3;CAV1;CCND1;CD44;CDH1;CDK2;CDK4;CDKN1A;CHEK1;CKS2;CTNNB1;DNMT1;DSP;EGF;EGFR;EPB41;ERBB2;ESR1;EZR;FAT3;FGFR1;GJA1;GPX1;GRB2;GSTP1;HIF1A;HLA-A;HRAS;IGF1R;IGF2BP1;JAG1;JAK1;JAK2;KMT2A;MCM2;MCM3;MCM4;MCM5;MCM6;MCM7;MDM2;MGEA5;MIB1;MKI67;MN1;MSH2;MSH3;MTOR;MTR;MYC;NF1;NF2;NOS2;NOTCH1;NOTCH2;NR3C1;ODC1;PAK1;PARP1;PCNA;PIK3CA;PIK3C…
Long eyelashes	6.82491e-05	14	ARID1A;CREBBP;EP300;FBN1;KMT2D;NIPBL;NOTCH2;ORC1;PACS1;PNPLA6;RAD21;ROR2;SMARCA4;SMC3		Agenesis of corpus callosum	9.60006e-10	72	ACACA;AKT1;AMER1;APC;ATM;BARD1;BMS1;BRCA1;BUB1B;CAD;CCNB1;CCND1;CDK2;CDK5;CDK5RAP2;CDON;CENPF;CPT2;CREBBP;CTNNB1;CTTN;DICER1;EGFR;EP300;ERBB2;ESR1;FGFR1;FIG4;GAS5;GLDC;GLI3;GPC3;GSTP1;IGF1R;JAG1;JUN;KAT6B;KIF14;LONP1;LRP2;MALAT1;MAPK8;MED12;MMRN1;MTOR;NOTCH1;NR3C1;NUMA1;OTX2;PCNA;PHGDH;PIK3CA;PIK3CB;PPARG;PROM1;PRPF31;PTCH1;PTTG1;RPS6KB1;RRM1;SIN3A;SKP2;SLC12A6;SMAD4;SMARCA2;SPEN;SPHK1;STAT3;TOP2…
Frontal bossing	7.88501e-05	33	ANKRD11;APC2;CREBBP;CUL7;EP300;FBN2;FGFR1;FLII;FLNA;FLNB;GLI3;HDAC6;HSD17B4;INPPL1;LRP4;MED12;NSD2;OBSL1;OCRL;ORC1;PEX5;PIK3CA;PIK3R1;PTCH1;RAI1;ROR2;SEC23A;SEC24D;SETD2;STAT3;TRIM37;TTC37;WASHC5		Invasive Carcinoma	1.20811e-09	47	APC;AURKA;BCAR1;BRAF;BRCA1;BRCA2;CBX5;CCND1;CD44;CDH1;CHEK1;CTNNB1;CTTN;EGF;EGFR;ERBB2;ESR1;FGFR1;FYN;GNAS;GSN;H2AFX;IGF1R;MAST2;MDM2;MIB1;MKI67;MYC;NOTCH1;PCNA;PIK3CA;PTEN;SDC1;SMAD4;SRC;STAT1;STAT5B;TAGLN;TERF1;TERF2;TIMP2;TOP2A;TP53;TP53BP1;TPT1;VIM;YES1
Hypotrophic malar bone	8.75229e-05	29	AGL;ARVCF;ATRX;BLM;CHD7;CUL7;DCHS1;EFTUD2;FBN1;FGFR1;FLNA;FLNB;GLI2;HSPG2;INPPL1;KIF1A;LRP2;LRPPRC;LTBP4;NF1;NOTCH3;OBSL1;PEX1;POLE;RAB3GAP2;RAI1;ROR2;SEC23A;SEC24C		Thyroid carcinoma	1.20811e-09	134	ABL1;ACACA;ACLY;AKAP9;AKT1;APC;AR;ATF4;ATM;AURKA;AURKB;BCR;BIRC5;BMS1;BRAF;BRCA2;BUB1;BUB1B;CAV1;CBX5;CCND1;CD44;CDH1;CDK2;CDK4;CDK5;CDKN1A;CLIP2;CPSF2;CREB1;CREB5;CREBBP;CSE1L;CSNK2A1;CTNNA1;CTNNB1;DIAPH1;DICER1;DNER;DOCK11;EFNB2;EGF;EGFR;EIF2AK2;EIF4E;ELN;EPHB2;ERBB2;ERC1;ESR1;FBN1;FGFR1;FN1;GOLGA5;GRK2;GSK3B;GSTP1;HIF1A;HLA-C;HLTF;HMGA1;HNRNPD;HRAS;HSP90AA1;IGF1R;IQGAP1;JUN;KAT5;MADD;MAPK1;MAP…
Malar flattening	8.75229e-05	29	AGL;ARVCF;ATRX;BLM;CHD7;CUL7;DCHS1;EFTUD2;FBN1;FGFR1;FLNA;FLNB;GLI2;HSPG2;INPPL1;KIF1A;LRP2;LRPPRC;LTBP4;NF1;NOTCH3;OBSL1;PEX1;POLE;RAB3GAP2;RAI1;ROR2;SEC23A;SEC24C		Stomach Carcinoma	1.61783e-09	317	ABCA1;ABCC4;ACACA;ADAMTS9;ADCY3;AKAP12;AKT1;ANXA2;APAF1;APC;APEX1;AR;ARID1A;ATF4;ATM;ATP7A;ATR;ATRX;AURKA;AURKB;AXIN1;BIRC5;BMS1;BRAF;BRCA1;BRCA2;BTRC;BUB1;BUB1B;CAD;CALM1;CALM2;CALM3;CALR;CASK;CAV1;CBL;CCAR2;CCNB1;CCND1;CD44;CDC20;CDC42;CDH1;CDK2;CDK5;CDKN1A;CFTR;CHAF1A;CHEK1;CKAP2;CKS1B;CKS2;CREB1;CRK;CTBP1;CTNNA1;CTNNB1;CTNND1;CTTN;DDX27;DICER1;DLL1;DNMT1;DOCK1;DPYSL3;EFNB1;EFNB2;EGF;EGFR;EIF3…
Full lower lip	8.75229e-05	19	ARID1A;ATRX;BAZ1B;CLIP2;CUL4B;CUL7;FBN1;GTF2I;INSR;KAT6B;KIF11;MED12;ORC1;PHGDH;PTPN11;SIN3A;SMARCA4;SOS1;SOS2		Pancreatic Neoplasm	1.67871e-09	141	ABCC4;AKT1;AMER1;ANXA2;APC;APEX1;ARHGEF2;ARID1A;ASPM;ATM;ATR;ATRX;AURKA;BCAR1;BIRC5;BRAF;BRCA1;BRCA2;BUB1;CAV1;CCND1;CD44;CDC42BPA;CDH1;CDK2;CDK9;CDKN1A;CFTR;CHEK1;CNR1;CRK;CTNNA1;CTNNB1;CTNND1;DAXX;DCAF1;DDR1;DLG5;EGF;EGFR;EIF3F;EPHA3;EPHB2;ERBB2;EZR;FANCA;FANCC;FANCG;GCNT1;GMNN;GNAS;GPX1;GSK3B;GSN;GSTP1;HIF1A;HLA-A;HLA-C;HRAS;HSP90AA1;IGF1R;IGF2R;IRS1;IRS2;ITGA6;JAG1;JAK1;JAK2;JUN;KDM4A;KIF14;K…
Prominent lower lip	8.75229e-05	19	ARID1A;ATRX;BAZ1B;CLIP2;CUL4B;CUL7;FBN1;GTF2I;INSR;KAT6B;KIF11;MED12;ORC1;PHGDH;PTPN11;SIN3A;SMARCA4;SOS1;SOS2		Malignant neoplasm of stomach	1.78314e-09	310	ABCA1;ABCC4;ACACA;ADAMTS9;ADCY3;AGO2;AKAP12;AKT1;ANXA2;APAF1;APC;APEX1;AR;ARID1A;ATF4;ATM;ATP7A;ATR;ATRX;AURKA;AURKB;AXIN1;BIRC5;BMS1;BRAF;BRCA1;BRCA2;BTRC;BUB1;BUB1B;CALM1;CALM2;CALM3;CALR;CAV1;CBL;CCNB1;CCND1;CD44;CDC20;CDC42;CDH1;CDK2;CDK5;CDKN1A;CFTR;CHAF1A;CHEK1;CKAP2;CKS2;CREB1;CRK;CTBP1;CTNNA1;CTNNB1;CTNND1;CTTN;DDX27;DICER1;DLL1;DNMT1;DOCK1;DPYSL3;EFNB1;EFNB2;EGF;EGFR;EPHA3;EPHB2;ERBB2;ES…
Congenital pes cavus	9.65292e-05	23	AARS;ATP7A;CUL4B;DYNC1H1;FBN1;FGFR1;GARS;HSD17B4;KARS;KIF1B;KIF5A;MFN2;MORC2;PEX5;POLG;SACS;SETX;SYNJ1;VCP;VPS13A;WASHC5;ZFYVE26;ZNF592		Nephroblastoma	1.78985e-09	79	ABCA1;ABL1;ACTN4;ADAR;AMER1;APC;AR;BCR;BRCA1;BRCA2;BUB1B;CCND1;CD44;CDH1;CDK4;CIC;CSNK2A1;CTCF;CTNNA1;CTNNB1;CTR9;DICER1;DIS3;DROSHA;EGFR;EPHB2;ERBB2;ESR1;EWSR1;FLII;FN1;GPC3;HIF1A;HLA-A;HLA-C;HRAS;HSP90AA1;HSPA4;IGF1R;IGF2R;INTS2;JAG1;KMT2A;MCM2;MIB1;MLH1;MSH3;NCAM1;NES;NGF;NPM1;PALB2;PBX1;PCNA;PHF2;PIK3CA;PIK3CB;PLXNA1;PPP2R1A;PROM1;PTCH1;PTEN;RARA;RBBP7;RRM1;SALL2;SALL4;STAT1;STAT3;TBC1D9;TERF…
Sandal gap	9.8743e-05	11	ATR;CENPE;CUL4B;DSP;FLNA;FLNB;HERC2;LTBP4;NBAS;PCNT;PIK3CA		Dull intelligence	2.06882e-09	145	ADNP;AFF2;AHDC1;AKT1;ANK3;ANKRD11;APC2;ARFGEF2;ARID1A;ATP5E;ATP7A;ATR;ATRX;BAZ1B;BCOR;BCR;BRAF;BRCA2;BUB1;BUB1B;C2CD3;CASK;CAV1;CENPE;CHD2;CHD7;CLIP2;COL4A3BP;CPS1;CREBBP;CTCF;CTNNB1;CUL4B;DCHS1;DKC1;DMXL2;DNA2;DYNC1H1;EFNB1;EFTUD2;ELN;EP300;FANCA;FANCC;FANCD2;FANCG;FANCI;FASTKD2;FGD1;FGFR1;FLII;FLNA;FLNB;GJA1;GLDC;GNAS;GRIP1;GTF2I;HCFC1;HDAC4;HERC2;HNRNPK;HRAS;HSPG2;HUWE1;IFT140;IFT172;IGF1R;KAN…
Malocclusion	0.000124479	18	ATR;BAZ1B;BCOR;CLIP2;CREBBP;DCHS1;EP300;FLNA;GLI2;GRIP1;GTF2I;IGF1R;LRP5;NOTCH2;PIK3R1;PTCH1;PTPN11;SOS1		Low intelligence	2.06882e-09	145	ADNP;AFF2;AHDC1;AKT1;ANK3;ANKRD11;APC2;ARFGEF2;ARID1A;ATP5E;ATP7A;ATR;ATRX;BAZ1B;BCOR;BCR;BRAF;BRCA2;BUB1;BUB1B;C2CD3;CASK;CAV1;CENPE;CHD2;CHD7;CLIP2;COL4A3BP;CPS1;CREBBP;CTCF;CTNNB1;CUL4B;DCHS1;DKC1;DMXL2;DNA2;DYNC1H1;EFNB1;EFTUD2;ELN;EP300;FANCA;FANCC;FANCD2;FANCG;FANCI;FASTKD2;FGD1;FGFR1;FLII;FLNA;FLNB;GJA1;GLDC;GNAS;GRIP1;GTF2I;HCFC1;HDAC4;HERC2;HNRNPK;HRAS;HSPG2;HUWE1;IFT140;IFT172;IGF1R;KAN…
Broad forehead	0.000134272	17	BAZ1B;CASK;CLIP2;CUL7;FGD1;FLII;FLNA;GTF2I;JAG1;LRP2;LRP5;NOTCH2;OBSL1;PIK3CA;POLE;RAI1;WASHC5		Poor school performance	2.06882e-09	145	ADNP;AFF2;AHDC1;AKT1;ANK3;ANKRD11;APC2;ARFGEF2;ARID1A;ATP5E;ATP7A;ATR;ATRX;BAZ1B;BCOR;BCR;BRAF;BRCA2;BUB1;BUB1B;C2CD3;CASK;CAV1;CENPE;CHD2;CHD7;CLIP2;COL4A3BP;CPS1;CREBBP;CTCF;CTNNB1;CUL4B;DCHS1;DKC1;DMXL2;DNA2;DYNC1H1;EFNB1;EFTUD2;ELN;EP300;FANCA;FANCC;FANCD2;FANCG;FANCI;FASTKD2;FGD1;FGFR1;FLII;FLNA;FLNB;GJA1;GLDC;GNAS;GRIP1;GTF2I;HCFC1;HDAC4;HERC2;HNRNPK;HRAS;HSPG2;HUWE1;IFT140;IFT172;IGF1R;KAN…
Leukemia, Myelocytic, Acute	0.000138881	164	ABCA1;ABCA3;ABCC4;ABL1;AFDN;AGRN;AKAP12;AKAP13;AMER1;AP2A1;APAF1;ARHGEF12;ARHGEF2;ASXL1;ATF7IP;ATM;ATP7A;ATR;BCOR;BCORL1;BCR;BIRC6;BLM;BRCA1;BRCA2;BRD7;BUB1;CDH2;CEBPZ;CHD1;CHD4;CHD8;CREBBP;CTNNA1;CTNNB1;DAXX;DDR1;DDX46;DHX15;DHX16;DICER1;DNMT1;DOCK6;EHMT2;EIF3A;EP300;EP400;EPC2;EPHB2;ERBB2;ERC1;EWSR1;FAF1;FANCD2;FAT1;FBN2;FGFR1;FN1;FNDC3A;FUS;FYN;GSN;GTF2I;HDAC2;HDAC6;HIF1A;HLTF;HSPA4;HSPA9;IGF1…		Mental deficiency	2.33576e-09	145	ADNP;AFF2;AHDC1;AKT1;ANK3;ANKRD11;APC2;ARFGEF2;ARID1A;ATP5E;ATP7A;ATR;ATRX;BAZ1B;BCOR;BCR;BRAF;BRCA2;BUB1;BUB1B;C2CD3;CASK;CAV1;CENPE;CHD2;CHD7;CLIP2;COL4A3BP;CPS1;CREBBP;CTCF;CTNNB1;CUL4B;DCHS1;DKC1;DMXL2;DNA2;DYNC1H1;EFNB1;EFTUD2;ELN;EP300;FANCA;FANCC;FANCD2;FANCG;FANCI;FASTKD2;FGD1;FGFR1;FLII;FLNA;FLNB;GJA1;GLDC;GNAS;GRIP1;GTF2I;HCFC1;HDAC4;HERC2;HNRNPK;HRAS;HSPG2;HUWE1;IFT140;IFT172;IGF1R;KAN…
Pectus excavatum	0.000138881	25	ATP7A;BCOR;CREBBP;CUL7;EP300;FBN1;FGD1;FLNA;FLNB;HSD17B4;IGF1R;KAT6B;KDM5C;MED12;MEGF8;NOTCH3;PIK3CA;PPP2R1A;PTCH1;PTPN11;RAB3GAP2;ROR2;SEC24D;SOS1;SOS2		Rhabdomyosarcoma, Embryonal	2.41619e-09	35	AKT1;AMER1;APEX1;ATRX;BUB1B;CDK4;CRK;DICER1;EGFR;EPHB2;ERBB2;ESR1;HRAS;IARS;IGF1R;JUP;MAPK1;MAPK14;MAPK8;MDM2;MTOR;NCAM1;NCOA1;NCOA2;NOTCH1;PIK3CA;PIK3CB;PRKDC;PROM1;PTCH1;PTEN;SMAD4;SOS1;TP53;YBX1
Single transverse palmar crease	0.000138881	12	ANKRD11;ATR;CREBBP;EP300;FGD1;FIG4;MED12;NIPBL;PEX1;PEX5;RBM10;SIN3A		Squamous cell carcinoma of esophagus	2.48697e-09	161	ABCC4;ACACA;ADAMTS9;ADAR;AKAP12;AKT1;ANXA2;APC;AR;ASH1L;ATM;AURKA;AURKB;BIRC5;BIRC6;BMS1;BRAF;BRCA1;BRCA2;BUB1B;CALR;CAV1;CCNB1;CCND1;CD44;CDC42;CDH1;CDK2;CDK4;CDK7;CDKN1A;CHAF1A;CHEK1;CREBBP;CRK;CTNNB1;CTTN;DNMT1;DSP;EFNB2;EGF;EGFR;EIF4E;EP300;EPC2;EPHA3;EPHB2;ERBB2;ESR1;EZR;FAT1;FAT3;FAT4;FGFR1;FLNB;FN1;GEMIN4;GNL3;GRB2;GSTP1;HIF1A;HIST1H2BM;HIST1H4A;HIST1H4B;HIST1H4C;HIST1H4D;HIST1H4E;HIST1H4H…
Unilateral Breast Carcinoma	0.000162153	6	ATM;BRCA1;BRCA2;ERBB2;PALB2;PLCG1		B-Cell Lymphomas	2.64616e-09	132	ABL1;AKT1;ANXA2;ARID1A;ASAP1;ASCC3;ASXL1;ATM;AURKA;BCL9;BCR;BIRC5;BLM;BRAF;BRCA2;CBL;CCNB1;CCND1;CD44;CDC42;CDH1;CDK2;CDK4;CDKN1A;CHEK1;CLTC;CREB1;CRK;CSE1L;CSNK2A1;CTCF;CTSC;EIF4A1;EIF4A2;EP300;EPHA7;EPHB2;ERBB2;ESPL1;ESR1;FAU;FBXO11;FGFR1;FN1;GAS5;GLI2;GSTP1;H2AFX;HDAC3;HDAC4;HDAC6;HIP1;HLA-A;HLA-C;HSPH1;HUWE1;IGF1R;INSR;IRS2;JAG1;JAK2;KMT2A;KMT2B;KMT2D;LONP1;MAP4;MAPK1;MAPK14;MAPK8;MCL1;MDM2;M…
Angle class 2 malocclusion	0.00016947	17	ATR;BAZ1B;BCOR;CLIP2;CREBBP;DCHS1;EP300;FLNA;GLI2;GRIP1;GTF2I;LRP5;NOTCH2;PIK3R1;PTCH1;PTPN11;SOS1		Delayed bone age	2.78163e-09	44	ANKRD11;ATR;ATRX;BLM;BRAF;CDC6;CENPE;CHD7;CREBBP;CTBP1;CUL7;EP300;ESR1;FBN1;FGFR1;FLNB;FMR1;GJA1;HRAS;HSD17B4;HSPG2;IGF1R;INPPL1;INSR;KAT6B;LONP1;NIN;NIPBL;NSD2;OBSL1;ORC1;ORC4;PCNT;PEX1;PIK3R1;PTPN11;RAD21;ROR2;SMC1A;SMC3;SOS1;SOS2;STAT1;ZBTB16
Angle class 3 malocclusion	0.00016947	17	ATR;BAZ1B;BCOR;CLIP2;CREBBP;DCHS1;EP300;FLNA;GLI2;GRIP1;GTF2I;LRP5;NOTCH2;PIK3R1;PTCH1;PTPN11;SOS1		Burkitt Lymphoma	3.70055e-09	82	ABL1;AGO2;AKT1;APAF1;APC;ARID1A;ATM;BCL9;BCR;BIRC5;BRCA1;CAD;CCND1;CCT6B;CD44;CDK2;CDKN1A;CKS1B;CRK;CSE1L;DLL1;DNER;DNMT1;EGF;EGFR;ELN;EP300;EPHB2;ERBB2;FAU;FN1;GMNN;HIF1A;HLA-A;HLA-C;HMGA1;HNRNPK;HSPA4;INSR;JAK1;KMT2A;LEF1;MAPK1;MAPK14;MCL1;MCM2;MDM2;MIB1;MKI67;MUM1;MYC;NAA15;NME1;NOTCH1;NOTCH2;NR3C1;NUP214;PBX1;PCBP1;PCNA;PHGDH;PIK3CA;PIK3CB;PIK3R1;PLK1;PLK2;RANGAP1;RBL2;SDC1;SKP2;SMARCA1;SMARC…
Low-set, posteriorly rotated ears	0.000187517	26	BAZ1B;BCOR;CHD7;CLIP2;CTNND2;FGD1;FGFR1;GRIP1;GTF2I;HSPG2;INSR;KAT6B;NF1;NIPBL;NSD2;OCRL;PEX1;PEX5;PTPN11;RAB3GAP2;RAD21;ROR2;SMC3;SOS1;SOS2;ZNF423		Tonsillar Carcinoma	4.08209e-09	12	CCNB1;CDH1;EGFR;HIF1A;PIK3CA;PIK3CB;PRKDC;PTEN;SKP1;TP53;VIM;XRCC5
Upward slant of palpebral fissure	0.000187517	20	AHDC1;AP3B1;ARVCF;ATRX;C2CD3;COL4A3BP;EFTUD2;FIG4;FLII;HSD17B4;JAG1;KDM5C;MEGF8;PCNT;PEX1;PEX5;RAI1;ROR2;SEC24C;SIN3A		Leukemia, Lymphocytic, Acute, L1	4.22969e-09	85	ABCA1;ABCC4;ABL1;ACACA;APAF1;ASPM;ATF7IP;ATM;AURKA;AURKB;BCR;BIRC6;BRAF;CASP8AP2;CCND1;CD44;CDK2;CDK4;CDKN1A;CREBBP;CTCF;DLL1;EP300;ESR1;FAT1;FEN1;GSTP1;H2AFZ;HDAC1;HDAC2;HDAC4;HDAC9;HIF1A;HIST1H2BK;HLA-C;HSP90AA1;IGF2R;JAK1;JAK2;KMT2A;LIG3;MAP4;MCL1;MDM2;MGA;MLH1;MSH3;MSH6;MTHFD1;MTOR;MTR;MYC;NME1;NOL4L;NOTCH1;NR3C1;NSD2;PARP1;PBX1;PCNA;PLK1;PPP2R2A;PPP2R3A;PROM1;PTEN;PTPN11;PTPRG;RAD51;RALGAPB;…
Decreased tendon reflex	0.000193056	28	ABCA1;ATP7A;DNMT1;DYNC1H1;FBN1;FIG4;FLII;FLNC;FUS;GARS;HK1;HSPG2;IARS2;KARS;KIF1A;KIF1B;LRP4;LYST;MFN2;NDUFS1;PEX1;PEX5;PNPLA6;POLG;RAI1;SYNJ1;SZT2;VPS13A		Stomach Neoplasms	5.71489e-09	167	ADAMTS9;AKAP12;AKT1;ANXA2;APAF1;APC;APEX1;AR;ARID1A;ATM;AURKA;AURKB;BIRC5;BRAF;BRCA1;BTRC;BUB1B;CALR;CAV1;CCND1;CCT7;CD44;CDC20;CDH1;CDH2;CDK4;CDK5;CDKN1A;CHD1;CHEK1;CLCN3;CPSF1;CTNNA2;CTNNB1;CTSC;DDB1;DDX27;DNMT1;EEF1A1;EFNB1;EFNB2;EGF;EGFR;EP300;EPHB2;ERBB2;ESR1;FAM168A;FAT4;FN1;FYN;GLI3;GNL3;GSK3B;GSTP1;HDAC1;HDAC2;HDAC3;HIF1A;HLA-A;HLA-C;HLTF;HNRNPD;HNRNPL;HRAS;HSPA8;HSPD1;IGF1R;IGF2R;INPPL1;…
Syndactyly	0.000193056	18	ACSL3;ANKRD11;BCOR;BLM;CREBBP;EP300;FBN2;FGD1;FGFR1;FRAS1;GLI3;LRP4;MED12;NEDD4L;NOTCH1;PIK3CA;ROR2;WASHC5		Fibrosarcoma	5.74161e-09	74	ABCA1;AKAP12;AKT1;ATF4;ATM;ATR;BRAF;CAD;CALM1;CALM2;CALM3;CAV1;CCND1;CD44;CDKN1A;EGF;EGFR;EPHB2;ERBB2;EWSR1;FBXW11;FLNA;FN1;FUS;GJA1;GNAS;HIF1A;HK1;HLA-C;HRAS;HSP90AA1;HSPA4;HSPD1;HSPG2;IGF1R;JAK1;JUN;KIF5B;KMT2A;LRP6;MAP3K1;MAPK1;MAPK8;MDM2;MIB1;MKI67;MSH2;NES;NF1;NR3C1;ODC1;PIK3CA;PIK3CB;PTEN;RAC1;RAD17;RAD51;RELA;RIF1;ROCK1;SETD2;SMAD2;SNRPE;SP1;STAT1;TBC1D9;THBS1;TIMP2;TP53;TPT1;TXN;TYRO3;WDT…
Nephroblastoma	0.000204667	48	ABCA1;ABL1;ACTN4;ADAR;AMER1;APC;BCR;BRCA1;BRCA2;CIC;CTCF;CTNNA1;CTNNB1;CTR9;DICER1;DIS3;DROSHA;EPHB2;ERBB2;EWSR1;FLII;FN1;HIF1A;HSPA4;IGF1R;IGF2R;INTS2;JAG1;KMT2A;MCM2;MIB1;MSH3;NES;PALB2;PHF2;PIK3CA;PIK3CB;PLXNA1;PPP2R1A;PTCH1;RRM1;SALL2;SALL4;STAT1;STAT3;TBC1D9;TOP2A;TRIM37		Osteosarcoma of bone	5.74161e-09	157	ABCA1;AKT1;AMBN;ANXA2;APAF1;APC;APEX1;ARHGAP35;ATF4;ATM;ATR;ATRX;AURKA;AURKB;BIRC5;BRD7;CALM1;CALM2;CALM3;CAPRIN1;CAV1;CCNB1;CCND1;CD44;CDC20;CDC5L;CDH2;CDK4;CDK5;CDKN1A;CHEK1;CNOT1;CTCF;CTNNB1;EGF;EGFR;EIF2AK2;EIF3A;EPHB2;ERBB2;ESPL1;ESR1;EWSR1;EZR;FBN1;FBXW11;FGFR1;FN1;FTL;GLI2;GLI3;GNL3;GSK3B;GSN;GSTP1;H2AFX;HDAC1;HDAC5;HDAC9;HIF1A;HMGA1;HSP90AA1;HSPA4;HUWE1;IGF1R;IGF2BP1;IGF2R;IMPDH2;IRS1;ITG…
Convex nasal bridge	0.000208915	17	AFF2;ARVCF;BCOR;CASK;CENPF;HSPG2;KAT6A;KAT6B;MED12;PCNT;POLR1A;RAB3GAP2;RB1;SEC23A;SEC24C;SIN3A;SMC3		Adenocarcinoma	5.76594e-09	263	ABCA1;ABCC4;ABL1;ACTN4;AGO2;AKT1;ANXA2;AP2A1;APAF1;APC;APC2;APEX1;AR;ARHGEF2;ARID1A;ATF7IP;ATM;AURKA;AURKB;AXIN1;BAG6;BCAR1;BIRC5;BRAF;BRCA1;BRCA2;BUB1;BUB1B;CALM1;CALM2;CALM3;CALR;CAND1;CAV1;CBL;CCND1;CD44;CDC5L;CDH1;CDH2;CDK2;CDK4;CDKN1A;CFTR;CHEK1;CKAP2;COL17A1;CREB1;CRK;CRMP1;CTNNB1;CTNND1;CTNND2;CTTN;DCLK1;DDR1;DICER1;DNMT1;DROSHA;DSP;DST;EEF2;EFNB1;EGF;EGFR;EIF3A;EIF3E;EIF4E;EML4;EP300;EPC2…
Joint laxity	0.000208915	17	ADNP;ATP7A;CREBBP;CUL4B;DCHS1;EP300;FBN1;FLNB;FN1;LTBP4;MED12;NOTCH2;ORC1;PIK3CA;PIK3R1;SEC23A;SIN3A		Global developmental delay	5.89828e-09	161	AARS;ADAR;ADNP;AHDC1;AKT1;ALMS1;ANKRD11;APC;APC2;ARFGEF2;ARID1A;ARID2;ARVCF;ATRX;BCR;BRAF;BRCA2;BUB1;BUB1B;CAD;CASK;CBL;CD44;CDC6;CDK5;CDON;CENPE;CHD2;CHD8;CLP1;COL4A2;COL4A3BP;CPS1;CTBP1;CTCF;CTNNB1;CUL4B;DHTKD1;DICER1;DKC1;DNA2;EFNB1;EFTUD2;EP300;EXOSC8;FANCA;FANCC;FANCD2;FANCG;FANCI;FASTKD2;FGFR1;FLII;FLNA;FMR1;GJA1;GLI2;HADHA;HDAC4;HERC2;HNRNPK;HRAS;HSD17B4;HSPA4;HSPD1;IGF1R;INSR;KARS;KAT6A;K…
Prominent nasal bridge	0.000208915	17	AFF2;ARVCF;BCOR;CASK;CENPF;HSPG2;KAT6A;KAT6B;MED12;PCNT;POLR1A;RAB3GAP2;RB1;SEC23A;SEC24C;SIN3A;SMC3		Hepatitis B	5.97148e-09	141	ACACA;ADAR;AGO2;AKT1;ANXA2;AP1G1;APC;AR;ARID2;ASAP1;ASCC3;ATM;AXIN1;BIRC5;BMS1;CALR;CAV1;CD44;CDC42;CDC6;CDH1;CDKN1A;CLIP2;CLTC;CREB1;CREBBP;CTNNB1;CUL5;DCLK1;DDB1;DHX15;DLL1;DNA2;DNMT1;EGF;EGFR;EIF2AK2;EIF4G2;EPHA3;ERBB2;ESR1;FASN;FBN2;FLNA;FLNB;FN1;FTL;GLI3;GPC3;GSK3B;GSTP1;H2AFX;HDAC1;HDAC3;HIF1A;HLA-A;HLA-C;HSPA4;HSPA8;HSPD1;HSPG2;IGF1R;INSR;JAG1;JAK1;JUN;KIDINS220;KIF1B;KMT2A;KMT2B;KMT2D;KRT…
Distal sensory impairment	0.00022612	16	AARS;CCT5;DYNC1H1;FIG4;GARS;IARS2;KARS;KIF1B;KIF5A;MARS;MFN2;MORC2;POLG;SACS;SBF1;VCP		Microsatellite Instability	6.31896e-09	27	APC;AR;ARID1A;ATR;BRAF;CHEK1;CTNNB1;ESR1;HDAC2;HIF1A;IGF1R;IRS1;IRS2;MLH1;MSH2;MSH3;MSH6;MTMR3;PIK3CA;PPARG;PTEN;PTPRS;SETD2;SMAD4;TP53;VDR;XPO5
Ewings sarcoma	0.00022612	51	ABCA1;ATM;BCAR1;BCOR;BCR;CIC;CREBBP;CSE1L;CTNND1;DDX46;DHX16;EPHA3;EPHB2;ERBB2;EWSR1;FGFR1;FLII;FN1;FUS;HIF1A;HSPA4;IGF1R;INSR;KDM1A;KDM3A;LRP1;MAML3;MSH2;MSH3;MSH6;MTOR;NEFM;NF1;NF2;PARP1;PIK3CA;PIK3CB;PTK2;PTPN11;PTPN13;PTPRD;RB1;SETD2;SMARCA5;SRRM2;STAG2;STAT1;STAT3;TAF15;TBC1D9;WDTC1		Tumor Initiation	6.41526e-09	61	AKT1;AR;ATM;BARD1;BLM;BRAF;BRCA1;CAV1;CCND1;CD44;CDH1;CRK;DDR1;DICER1;EGF;EGFR;EPHB2;ERBB2;FN1;GLI2;GNL3;HIF1A;HMGA1;HSPG2;IGF1R;IRS1;IRS2;ITGA6;KAT6B;KMT2A;MAPK1;MAPK14;MDM2;MYC;NCAM1;NCOA1;NOTCH1;ODC1;PBRM1;PCNA;PIK3CA;PIK3CB;PLK1;PROM1;PTEN;RAC1;RAD51;RASA1;RPL39;SART1;SDC1;SIRT1;SMAD4;SMARCA4;SRSF3;STAT3;TIAM1;TP53;VCAN;VHL;YBX1
Absent reflex	0.00022612	23	AARS;ADCY6;DST;FIG4;JAG1;KARS;KIF1A;KIF1B;LAMB2;LYST;MARS;MFN2;OCRL;PEX1;PEX5;PNPLA6;POLG;RAI1;SBF1;SLC12A6;TECPR2;UBA1;VPS13A		Li-Fraumeni Syndrome	7.83511e-09	24	AR;ATM;BRCA1;BRCA2;CAV1;CD44;CDH1;CDK2;CDKN1A;CHEK1;DOCK11;EGFR;ERBB2;ESR1;H2AFX;MDM2;MLH1;NF1;PCNA;PTEN;SHH;SKP2;TOP2B;TP53
Absent tendon reflex	0.00022612	23	AARS;ADCY6;DST;FIG4;JAG1;KARS;KIF1A;KIF1B;LAMB2;LYST;MARS;MFN2;OCRL;PEX1;PEX5;PNPLA6;POLG;RAI1;SBF1;SLC12A6;TECPR2;UBA1;VPS13A		Colonic Neoplasms	9.06935e-09	148	ABCC4;AKT1;ANAPC1;APC;APEX1;AR;ATM;ATP5E;ATP7A;ATR;AURKA;BCAR1;BCL9;BIRC5;BRAF;BRCA1;BRCA2;BRD8;BTRC;CALR;CAV1;CCNB1;CCND1;CD44;CDC16;CDH1;CDH2;CDK2;CDK7;CDKN1A;CHEK1;CTNNB1;DDX46;DDX5;DHX16;DNMT1;EFNB2;EGF;EGFR;EIF3E;EIF4E;EPHB2;ERBB2;ESR1;EZR;FASN;FAT1;FN1;GJA1;GLI2;GLI3;GNAS;GSK3B;GSTP1;HDAC2;HDAC3;HIF1A;HIP1;HLA-A;HLA-C;HLTF;HRAS;HSP90AA1;HSPA8;IGF1R;IGF2BP1;INPPL1;IRS1;IRS2;JAK2;JUN;KDM1A;KD…
Reflex, Deep Tendon, Absent	0.00022612	23	AARS;ADCY6;DST;FIG4;JAG1;KARS;KIF1A;KIF1B;LAMB2;LYST;MARS;MFN2;OCRL;PEX1;PEX5;PNPLA6;POLG;RAI1;SBF1;SLC12A6;TECPR2;UBA1;VPS13A		Neoplastic Cell Transformation	9.06935e-09	41	ACTG1;APC;BRAF;BRCA1;BRCA2;CCND1;CDH1;CTNNB1;CTNND2;EGF;ERBB2;ESR1;FN1;GSTP1;HRAS;IGF1R;IRS1;JAK2;JUN;MAPK8;MDM2;MTR;MYC;NOS2;NOTCH1;NPM1;NSD2;PARG;PHGDH;PHLPP1;PTK2;PTPRS;RAC1;RELA;SOD1;SP1;STAT3;TP53;VDR;VIM;ZEB1
Chorioretinal dystrophy	0.00022612	5	CREBBP;EP300;PNPLA6;RNF216;VPS13B		Uterine Fibroids	9.06935e-09	79	ADGRV1;AKT1;APEX1;AR;ATF4;ATF7IP;ATR;BCR;CAV1;CCND1;CD44;CDK2;CDKN1A;COL4A2;COX6C;CTNNB1;DNMT1;EGF;EGFR;EIF2AK2;EPHB2;ESR1;EWSR1;FASN;FBN1;FN1;FNDC3A;GJA1;GRB2;HRAS;IGF1R;KAT6A;KAT6B;MAPK1;MCL1;MDM2;MED12;MED13;MIB1;MKI67;MMRN1;MTOR;NBR1;NCOA1;NCOA2;NCOR1;NCOR2;NES;NOTCH2;NR3C1;ORC5;PCNA;PIK3CA;PIK3CB;POLE;PPARG;PTCH1;PTEN;PTTG1;RXRA;SALL1;SERPINH1;SHH;SMAD2;SMAD3;SMAD4;SP1;SPHK1;SPTB;SRC;TET1;TE…
Thin upper lip vermilion	0.000250906	19	ACTG1;ADNP;AGL;AP3B1;ATRX;BCR;CTNNB1;FBN1;HERC2;IGF1R;KAT6A;KDM5C;KIF11;KMT2A;MED12;NIPBL;RAD21;ROR2;SEC23A		Secondary malignant neoplasm of lymph node	9.07463e-09	200	ACTN4;ADAMTS9;AGO2;AKAP12;AKT1;ANXA2;APC;APEX1;AR;ARID1A;ATF4;ATM;AURKA;AURKB;AXIN1;BCAR1;BIRC5;BRAF;BRCA1;BRCA2;BUB1;BUB1B;CALR;CAPN1;CAV1;CCAR2;CCNB1;CCND1;CD44;CDC42;CDH1;CDK2;CDK4;CDK5;CDK7;CDKN1A;CENPF;CHEK1;CIC;CPSF2;CREB1;CRMP1;CSE1L;CTNNB1;CTNND1;CTNND2;CTTN;CUL3;CYFIP1;DICER1;DNMT1;DPYSL3;EFNB2;EGF;EGFR;EIF3A;EPHB2;ERBB2;ESR1;EWSR1;EZR;FAT4;FGFR1;FLNA;FLNB;FN1;FUS;GAS5;GCNT1;GIT1;GRB2;GS…
Spastic Paraplegia, Hereditary	0.00025482	17	ALS2;GBA2;HSPD1;IFT122;IMMT;KIF1B;KIF5A;KIF5B;KIF5C;MFN2;PNPLA6;SPAST;SPG11;TECPR2;VCP;WASHC5;ZFYVE26		Luminal B Breast Carcinoma	1.07199e-08	32	BRCA1;BRCA2;CCNB1;CCND1;CD44;CDH1;EFNB1;EGFR;EIF4E;ERBB2;ESPL1;ESR1;FGFR1;FTL;GSTP1;IGF1R;KAT6A;KRT8;MYC;PHB;PIK3CA;PIK3CB;PPP4R1;RASAL2;RB1;RICTOR;SLC9A3R1;STAT3;TOP2A;TP53;UTRN;YES1
Rhabdomyosarcoma	0.00025482	55	AP2A1;AP2B1;ATM;ATP2B1;CIC;CLTC;DICER1;EPHA3;EPHB2;ERBB2;EWSR1;FBXW11;FGFR1;FN1;GLI2;GLI3;HDAC6;HIF1A;HMGXB3;IGF1R;IGF2BP1;INSR;JAG1;JARID2;KDM1A;KIDINS220;MIB1;MKI67;MSH2;MSH6;MTOR;NCOA2;NES;NF1;NOTCH1;NOTCH3;ODC1;PARD3;PARP1;PIK3CA;PIK3CB;PKN1;PTCH1;PTPN11;RB1;ROCK1;SART3;SETD2;SMARCA1;SMARCA4;STAT1;SYNJ1;TBC1D9;VPS13A;XAB2		Carcinoma, Transitional Cell	1.14518e-08	85	AKT1;ANXA2;APAF1;AR;ARID1A;ATR;BIRC5;BRAF;BRCA1;CAV1;CCAR2;CCND1;CD44;CDC20;CDH1;CDK2;CDKN1A;CHD6;CREBBP;DLL1;DNMT1;EGF;EGFR;EIF3A;EIF4E;EP300;ERBB2;ESPL1;ESR1;FGFR1;FN1;GLI2;GNAS;GPX1;GSN;GSTP1;HDAC1;HDAC2;HIF1A;HLA-C;HRAS;KMT2A;KMT2C;LZTS1;MAP1S;MCM2;MDM2;MIB1;MKI67;MLH1;MSH2;MSH6;MTOR;MTR;MYC;NCOR1;NME1;NOTCH1;NR3C1;NUMA1;PARP1;PCNA;PIK3CA;PIK3CB;PIK3R1;PIKFYVE;PRRC2C;PTBP1;PTCH1;PTEN;RBX1;RPS…
High forehead	0.00025482	24	ANKRD11;APC2;ATP7A;BAZ1B;CLIP2;CPT2;FGFR1;GLI3;GTF2I;HSD17B4;KAT6B;LRP5;MED12;NSD2;PEX1;PEX5;PIK3CA;PTPN11;SETD2;SIN3A;SOS1;SOS2;SZT2;WASHC5		Broad flat nasal bridge	1.24318e-08	67	ADNP;AP3B1;ARID1A;ARVCF;ATRX;BAZ1B;BRAF;CASK;CENPF;CLIP2;CLP1;CREBBP;CTBP1;CTNND2;DCHS1;EFNB1;ELN;EP300;FBN1;FGD1;FGFR1;FLII;FLNA;FLNB;GJA1;GLI3;GPC3;GRIP1;GTF2I;HSPG2;IFT140;IFT172;IGF1R;KMT2D;LRPPRC;LTBP4;MED12;MEGF8;NSD2;PCNT;PEX1;PEX5;PIK3R1;PROM1;PRPF31;PRPF4;PRPF6;PRPF8;PTCH1;PTPN11;RAB3GAP2;RAD21;RAI1;RB1;RBM10;RFC2;ROR2;SEC23A;SEC24C;SIN3A;SLC12A6;SMARCA4;SNRNP200;STAT3;TRIM37;UBA1;WASHC5
Tall forehead	0.00025482	24	ANKRD11;APC2;ATP7A;BAZ1B;CLIP2;CPT2;FGFR1;GLI3;GTF2I;HSD17B4;KAT6B;LRP5;MED12;NSD2;PEX1;PEX5;PIK3CA;PTPN11;SETD2;SIN3A;SOS1;SOS2;SZT2;WASHC5		Nasal bridge wide	1.24318e-08	67	ADNP;AP3B1;ARID1A;ARVCF;ATRX;BAZ1B;BRAF;CASK;CENPF;CLIP2;CLP1;CREBBP;CTBP1;CTNND2;DCHS1;EFNB1;ELN;EP300;FBN1;FGD1;FGFR1;FLII;FLNA;FLNB;GJA1;GLI3;GPC3;GRIP1;GTF2I;HSPG2;IFT140;IFT172;IGF1R;KMT2D;LRPPRC;LTBP4;MED12;MEGF8;NSD2;PCNT;PEX1;PEX5;PIK3R1;PROM1;PRPF31;PRPF4;PRPF6;PRPF8;PTCH1;PTPN11;RAB3GAP2;RAD21;RAI1;RB1;RBM10;RFC2;ROR2;SEC23A;SEC24C;SIN3A;SLC12A6;SMARCA4;SNRNP200;STAT3;TRIM37;UBA1;WASHC5
Penile hypospadias	0.000277609	28	ATR;ATRX;BCOR;CREBBP;CUL4B;CUL7;DCHS1;DOCK11;EP300;FGFR1;FIG4;FLNA;GRIP1;MAP3K1;MED12;NIPBL;NOTCH2;NSD2;PCNT;PEX1;PEX5;PTPN11;RAD21;SALL1;SIN3A;SMC3;UBA1;WASHC5		Fibroid Tumor	1.24318e-08	75	ADGRV1;AKT1;APEX1;AR;ATF4;ATF7IP;ATR;BCR;BRCA1;CAV1;CCND1;CD44;CDH1;CDK2;CDKN1A;CTNNB1;DNMT1;EGF;EGFR;EIF2AK2;EPHB2;ERBB2;ESR1;EWSR1;FBN1;FGFR1;FN1;GJA1;GRB2;HRAS;IGF1R;KAT6B;MAPK1;MCL1;MDM2;MED12;MED13;MIB1;MKI67;MMRN1;MTOR;MYC;NBR1;NCOA1;NCOA2;NCOR1;NCOR2;NES;NR3C1;ORC5;PARP1;PCNA;PPARG;PTCH1;PTEN;PTTG1;RXRA;SALL1;SERPINH1;SHH;SMAD2;SMAD3;SMAD4;SP1;SPHK1;SRC;TET1;TET3;THBS1;TIMP2;TP53;TSC2;TXN;…
Obsessive compulsive behavior	0.000296043	13	ADNP;AFF2;BAZ1B;CHD7;CLIP2;CYFIP1;GTF2I;MED12;NIPBL;OCRL;RAD21;SMC3;UBE3A		Malignant neoplasm of endometrium	1.32585e-08	106	AFDN;AKT1;ANXA2;APC;APEX1;AR;ARID1A;ATAD2;ATM;BIRC5;BRAF;BRCA1;BRCA2;BUB1B;CAV1;CCND1;CD44;CDH1;CDK4;CDKN1A;CHEK1;CREBBP;CTCF;CTNNB1;CTNND1;DDR1;DICER1;DROSHA;EGF;EGFR;EIF4E;EP300;EPHB2;ERBB2;ESR1;EZR;FANCD2;GAS5;GSTP1;H2AFX;HDAC9;HIF1A;HRAS;HSD17B4;HSP90AA1;IGF1R;INSR;JAK1;KDM4A;KDM4B;LEF1;LLGL1;LRPPRC;MAP3K1;MAPK1;MCL1;MDM2;MLH1;MSH2;MSH3;MSH6;MTOR;NBR1;NCOA1;NCOA2;NME1;NOTCH1;NPM1;NRIP1;PAK1;P…
Syndactyly of the toes	0.000301682	14	FGFR1;FIG4;FLII;FLNA;GLI3;GRIP1;MEGF8;NIPBL;PHGDH;PIK3CA;RAD21;RAI1;SIN3A;SMC3		Uterine Corpus Cancer	1.32585e-08	106	AFDN;AKT1;ANXA2;APC;APEX1;AR;ARID1A;ATAD2;ATM;BIRC5;BRAF;BRCA1;BRCA2;BUB1B;CAV1;CCND1;CD44;CDH1;CDK4;CDKN1A;CHEK1;CREBBP;CTCF;CTNNB1;CTNND1;DDR1;DICER1;DROSHA;EGF;EGFR;EIF4E;EP300;EPHB2;ERBB2;ESR1;EZR;FANCD2;GAS5;GSTP1;H2AFX;HDAC9;HIF1A;HRAS;HSD17B4;HSP90AA1;IGF1R;INSR;JAK1;KDM4A;KDM4B;LEF1;LLGL1;LRPPRC;MAP3K1;MAPK1;MCL1;MDM2;MLH1;MSH2;MSH3;MSH6;MTOR;NBR1;NCOA1;NCOA2;NME1;NOTCH1;NPM1;NRIP1;PAK1;P…
Patent ductus arteriosus	0.000302592	36	ACACA;BCOR;BMS1;BRCA1;CHD7;CREBBP;EP300;ERBB2;FASN;FBN1;FBN2;FLNA;GLI3;KAT6A;MEGF8;MTA2;NOTCH2;NOTCH3;PARP1;PER1;PEX1;PHGDH;PIK3CA;PIK3CB;PLXND1;POLR1A;PTPN11;ROCK1;SMARCA1;SMARCA4;SREBF1;SSRP1;STAT3;USP11;USP9X;ZEB1		Mammary Tumorigenesis	1.39398e-08	50	AKT1;APC;ARHGEF2;BRCA1;BRCA2;CAV1;CCND1;CDC42;CDC7;CHEK1;CKS1B;CTNNB1;DNMT1;EGFR;EIF3E;ERBB2;ESR1;FGFR1;GNL3;GRB2;HRAS;INTS1;INTS2;IQGAP1;IRS2;JAK2;MCM3AP;MDM2;MMRN1;MTOR;MYC;NCOA1;NCOA3;NOTCH1;PALB2;PARP1;PCNA;PIK3CA;PIK3CB;PPARG;PREX1;PTEN;PTTG1;RARA;RB1;SRC;STAT3;TIAM1;TP53;UBE3A
Late tooth eruption	0.000314555	17	BCOR;CHD7;CUL7;FLNA;GNAS;KAT6B;LONP1;NIPBL;OBSL1;PIK3R1;POLR3B;PTCH1;RAD21;SEC23A;SEC24D;SMC3;STAT3		Cafe-au-Lait Spots	1.39784e-08	22	ATM;BLM;CBL;CREBBP;EP300;FANCA;FANCC;FANCD2;GNAS;KIF1B;KMT2D;MED12;MLH1;MSH2;MSH6;NF1;PCNT;PTEN;PTPN11;SIN3A;TSC2;VHL
Broad thumbs	0.000317782	11	CREBBP;EP300;FGFR1;FLNA;FLNB;GLI3;MED12;MEGF8;ROR2;SALL1;USP9X		Blast Phase	1.51387e-08	56	ABL1;ADAR;AKAP12;AKAP13;APAF1;ASXL1;ATM;ATP5E;AURKA;BCR;BIRC5;CBL;CCND1;CDH1;CDK2;CDK4;CREBBP;DLL1;EIF3A;EIF4E;EP300;ESPL1;GNL3;GSK3B;H2AFX;HNRNPK;HRAS;HSP90AA1;HSPA4;IMMT;JAK2;MAPK8;MDM2;MSH3;MYC;NPM1;NUP98;PAFAH1B1;PCBP2;PCNA;PCNT;PHGDH;PRKDC;PROM1;PTEN;RAC1;RALGAPB;SF3B1;SHH;SRC;TBC1D9;TERF1;TP53;YWHAE;YY1;ZNF423
Microsatellite Instability	0.000349192	16	APC;ARID1A;ATR;CTNNB1;HDAC2;HIF1A;IGF1R;IRS2;MSH2;MSH3;MSH6;MTMR3;PIK3CA;PTPRS;SETD2;XPO5		Leukemia, Myelomonocytic, Chronic	1.8207e-08	36	ABL1;ASXL1;BCOR;BCORL1;BCR;BIRC5;BRAF;CBL;CREBBP;DLL1;EIF4E;EPHB2;FGFR1;GRB2;HIP1;HRAS;HTT;JAK2;KMT2A;MAPK1;MYH10;NF1;NPM1;PAFAH1B1;PTPN11;RABEP1;RARS;SETD2;SF3B1;SRSF2;TET1;TET3;TP53;U2AF1;YWHAE;YY1
Mild Mental Retardation	0.000364214	23	AFF2;AGL;AP3B1;ARVCF;ATRX;BCOR;CTNND2;DHTKD1;EP300;FBN1;FLNA;HDAC6;HUWE1;KIF11;LEMD3;LRP5;NF1;POLR3B;PTPN11;RAB3GAP2;RAI1;SEC24C;TRIO		Ewings sarcoma	2.32311e-08	81	ABCA1;AKT1;ATM;AURKB;BCAR1;BCOR;BCR;BIRC5;CAV1;CBL;CCND1;CD44;CDK4;CIC;CREBBP;CSE1L;CTNND1;DDX46;DHX16;DNER;EIF4E;EPHA3;EPHB2;ERBB2;EWSR1;EZR;FGFR1;FLII;FN1;FUS;GJA1;H2AFX;HIF1A;HLA-A;HLA-C;HSPA4;IGF1R;INSR;KDM1A;KDM3A;LRP1;MAML3;MAPK1;MAPK8;MDM2;MLH1;MSH2;MSH3;MSH6;MTOR;MYC;NCAM1;NEFM;NF1;NF2;NGF;NME1;PARP1;PCNA;PIK3CA;PIK3CB;PLK1;PTBP1;PTEN;PTK2;PTPN11;PTPN13;PTPRD;RAC1;RB1;SETD2;SIRT1;SMARCA5;…
Bushy eyebrows	0.000377075	15	ANKRD11;ARID1A;BCOR;CREBBP;CUL7;EP300;IARS2;KMT2A;NBAS;NIPBL;NOTCH2;OBSL1;RAD21;SMARCA4;SMC3		Birthmark	2.69836e-08	21	ATM;BLM;CBL;CREBBP;EP300;FANCA;FANCC;FANCD2;KIF1B;KMT2D;MED12;MLH1;MSH2;MSH6;NF1;PCNT;PTEN;PTPN11;SIN3A;TSC2;VHL
Delayed speech and language development	0.000381072	25	AFF2;CREBBP;DHTKD1;EFTUD2;EP300;FGFR1;FLII;FLNA;HERC2;HUWE1;IFT172;IGF1R;KAT6B;KDM5C;KMT2A;LEMD3;LRPPRC;NF1;NIPBL;PEX1;PIK3R1;RAI1;SIN3A;SPTBN2;UBE3A		Malignant lymphoma, lymphocytic, intermediate differentiation, diffuse	3.12208e-08	75	AKT1;ARHGAP29;ARID1A;ATM;ATR;BCR;CALM1;CALM2;CALM3;CCNB1;CCND1;CD44;CDC42BPA;CDC6;CDK2;CDK4;CDK9;CDKN1A;CHEK1;CNR1;CTCF;CTNNB1;DAXX;EIF4E;FASN;GLI2;GMNN;GSK3B;GSTP1;HDAC6;HSP90AA1;HSPA4;LATS2;LCK;LEF1;LRPPRC;MAP2;MAP4K4;MAPK8;MCL1;MCM6;MDM2;MIB1;MKI67;MLH1;MSH2;MTOR;MUM1;MYC;NCL;NOTCH1;NOTCH2;NPM1;PARP1;PCNA;PCNT;PDE3B;PIK3CA;PIK3CB;PRDX1;PTEN;RAD51;RANGAP1;RB1;RPS6;SHH;SKP2;SMAD3;STAT1;STAT3;TOP…
Language Delay	0.000381072	25	AFF2;CREBBP;DHTKD1;EFTUD2;EP300;FGFR1;FLII;FLNA;HERC2;HUWE1;IFT172;IGF1R;KAT6B;KDM5C;KMT2A;LEMD3;LRPPRC;NF1;NIPBL;PEX1;PIK3R1;RAI1;SIN3A;SPTBN2;UBE3A		Low set ears	3.12208e-08	56	AHDC1;AP3B1;ARID1A;ARVCF;ATR;ATRX;BCOR;BRAF;BUB1B;CBL;CDC6;CENPF;CPT2;CREBBP;EFTUD2;EP300;FBN1;FGFR1;FIG4;FLNA;GJA1;GRIP1;HDAC6;HRAS;HSD17B4;HSPG2;INSR;KAT6A;KAT6B;KMT2A;LRP2;MED12;MEGF8;NF1;NIPBL;NOTCH2;NOTCH3;ORC1;PACS1;PAFAH1B1;PCLO;PCNT;PEX5;PTCH1;PTPN11;RB1;RBM10;RPL35A;SEC24C;SF3B4;SMAD4;SNRPB;TTC37;WASHC5;YWHAE;ZNF592
Speech impairment	0.000381072	25	AFF2;CREBBP;DHTKD1;EFTUD2;EP300;FGFR1;FLII;FLNA;HERC2;HUWE1;IFT172;IGF1R;KAT6B;KDM5C;KMT2A;LEMD3;LRPPRC;NF1;NIPBL;PEX1;PIK3R1;RAI1;SIN3A;SPTBN2;UBE3A		Cognitive delay	3.12208e-08	136	AARS;ADAR;ADNP;AHDC1;AKT1;ALMS1;ANKRD11;APC2;ARFGEF2;ARID1A;ARVCF;ATRX;BCR;BRAF;BRCA2;BUB1;BUB1B;CAD;CASK;CBL;CDC6;CDK5;CDON;CHD2;CLP1;COL4A2;COL4A3BP;CPS1;CTBP1;CTCF;CTNNB1;DHTKD1;DKC1;DNA2;EFNB1;EFTUD2;EP300;EXOSC8;FANCA;FANCC;FANCD2;FANCG;FANCI;FASTKD2;FGFR1;FLII;FLNA;FMR1;GJA1;GLI2;HADHA;HDAC4;HERC2;HNRNPK;HRAS;HSD17B4;HSPD1;INSR;KARS;KAT6A;KAT6B;KIAA0556;KIF1A;KIF5C;KMT2D;LARS;LEMD3;LONP1;LR…
Chronic Lymphocytic Leukemia	0.00038113	112	ABCA1;ABL1;APAF1;APC;ARHGEF2;ATM;ATR;BAG6;BCL9;BCOR;BCR;BRCA1;BRCA2;CHD2;CNOT1;CTNNB1;CUL5;CYFIP2;DDX46;DICER1;DNMT1;DOCK11;DROSHA;DSP;EIF4G1;EPHB2;ERBB2;FAT1;FN1;GNAS;HIF1A;HSPA4;HSPD1;HSPG2;IBTK;IGF1R;IGF2R;INSR;IQGAP1;JAG1;JAK1;KANK2;KMT2A;LATS2;LONP1;LRIG1;LRP4;LRP6;MADD;MCM4;MDC1;MED12;MGA;MIB1;MKI67;MPRIP;MSH2;MTOR;MUM1;NOS2;NOTCH1;NOTCH2;NOTCH3;NRIP1;NUP214;NUP98;ODC1;OGFOD1;PARP1;PDE3B;PE…		Mental and motor retardation	3.12208e-08	136	AARS;ADAR;ADNP;AHDC1;AKT1;ALMS1;ANKRD11;APC2;ARFGEF2;ARID1A;ARVCF;ATRX;BCR;BRAF;BRCA2;BUB1;BUB1B;CAD;CASK;CBL;CDC6;CDK5;CDON;CHD2;CLP1;COL4A2;COL4A3BP;CPS1;CTBP1;CTCF;CTNNB1;DHTKD1;DKC1;DNA2;EFNB1;EFTUD2;EP300;EXOSC8;FANCA;FANCC;FANCD2;FANCG;FANCI;FASTKD2;FGFR1;FLII;FLNA;FMR1;GJA1;GLI2;HADHA;HDAC4;HERC2;HNRNPK;HRAS;HSD17B4;HSPD1;INSR;KARS;KAT6A;KAT6B;KIAA0556;KIF1A;KIF5C;KMT2D;LARS;LEMD3;LONP1;LR…
Posteriorly rotated ear	0.00038113	17	AP3B1;ATRX;BCOR;CPT2;FLNA;GLI3;HSPG2;KAT6A;KMT2D;LRP2;NF1;NOTCH3;PEX1;PTPN11;RAB3GAP2;RBM10;ROR2		Brain Neoplasms	3.50845e-08	136	ABCA1;ADAR;ADGRB2;AKT1;ANXA2;APAF1;APC;APEX1;ATM;AURKA;AURKB;BRAF;BRCA1;BRCA2;BUB1B;CAV1;CCNB1;CCND1;CD44;CDC20;CDH1;CDK2;CDK4;CDKN1A;CHAF1A;CHEK1;DDR1;DLL1;EGF;EGFR;EIF3A;EML4;ENC1;EPHB2;ERBB2;ESR1;FASN;FGFR1;FN1;GJA1;GNL3;GPX1;GSTP1;HIF1A;HLA-A;HLA-C;HNRNPA1;HNRNPA2B1;HRAS;HSPA4;IGF1R;IGF2BP1;IGF2R;IMMT;JAG1;JAK2;KIF11;LAMB2;LAMC1;LRPPRC;MAGED1;MAPK1;MAPK8;MAPK8IP3;MARK4;MCL1;MCM3;MDM2;MIB1;MKI…
Myeloproliferative disease	0.000389147	39	ABCA1;ABL1;ASXL1;ATG2B;BCR;CCDC88C;CREBBP;CTNNB1;EP300;FGFR1;FN1;FUS;GOLGB1;HBS1L;HSPA9;IGF1R;IRS2;JAK1;KIDINS220;KIF5B;KMT2A;MN1;NF1;NIN;NUP98;ODC1;PIK3CA;PIK3CB;PTPN11;RABEP1;RARS;SF3B1;SPTBN1;STAT3;STAT5B;TBC1D9;TET1;WDTC1;ZMYM2		synovial sarcoma	3.67896e-08	54	AKT1;APC;BCOR;BIRC5;CAV1;CCND1;CDH1;CDKN1A;CRK;CTNNB1;EGFR;EP300;EPHB2;ERBB2;ETFA;EWSR1;EZR;GSK3B;HLA-C;HMGA1;IGF1R;MAPK1;MAPK14;MAPK8;MCM7;MDM2;MED1;MIB1;MKI67;MLH1;MSH3;MTOR;NCOA3;NES;NME1;NSF;PDZD4;PIK3CA;PIK3CB;PLS3;PROM1;PTEN;RAC1;RPL34;SALL2;SIRT1;SMARCA1;SMARCA2;SMARCA5;SRC;STAT3;TP53;VIM;YBX1
Tumor Progression	0.000431046	192	ABCA1;ABCC4;ABL1;AKAP12;AP2A1;APAF1;APC;APC2;ARHGAP21;ARHGAP35;ARHGEF2;ARID1A;ASAP1;ATAD2;ATM;ATR;BCAR1;BCL9;BPTF;BRCA1;BRCA2;BRD8;BUB1;CCDC88A;CDH2;CENPF;CHAF1A;CREBBP;CTCF;CTNNA2;CTNNAL1;CTNNB1;CTNND1;CYFIP2;DDR1;DDX5;DICER1;DLG5;DNMT1;EIF3A;EIF4A2;EIF4G1;EML4;EPHA7;EPHB2;ERBB2;ERBIN;EWSR1;FASN;FBXO11;FGD1;FGFR1;FLII;FLNA;FN1;FUS;FXR1;FYN;GLI2;GNAS;GREB1;HDAC2;HDAC6;HIF1A;HLTF;HNRNPU;HSPA4;HSPD…		Esophageal carcinoma	4.25987e-08	110	ABL1;ADAMTS9;AKAP12;AKT1;ANXA2;APC;AR;ATM;AURKA;BIRC5;BRCA1;BRCA2;CALR;CASK;CAV1;CCNB1;CCND1;CDC20;CDC42;CDH1;CDK2;CDKN1A;CREBBP;CTNNB1;CTTN;DCLK1;DNMT1;DOCK11;EFNB2;EGF;EGFR;EIF2AK2;EIF4E;ERBB2;ESR1;EZR;FAT4;FBXL19;FGFR1;FLNB;FUS;GEMIN4;GJA1;GNAS;GNL3;GSK3B;GSN;GSTP1;H2AFX;HDAC9;HIF1A;HLA-A;HRAS;HSPG2;IGF1R;INTS2;JAK1;LATS2;LEF1;LLGL1;LTBP4;MAGED1;MALAT1;MAPK1;MAPK14;MCM5;MDC1;MDM2;MLH1;MSH2;MSH…
Periventricular neuronal heterotopia	0.000431046	6	ANKRD11;ARFGEF2;DCHS1;FAT4;FLNA;KAT6B		Esophageal Neoplasms	4.25987e-08	120	ABL1;ADAMTS9;AKAP12;AKAP13;AKT1;ANXA2;APC;APEX1;AR;ATM;AURKA;AURKB;BAG6;BIRC5;BRAF;BRCA1;BRCA2;CALR;CCNB1;CCND1;CDC20;CDC42;CDH1;CDH2;CDK2;CDKN1A;CTNNB1;CTTN;DCLK1;DNMT1;DROSHA;EGF;EGFR;EIF2AK2;EIF4E;EPC2;EPG5;ERBB2;EZR;FANCG;FAT4;FBXL19;GEMIN4;GJA1;GNAS;GSK3B;GSN;GSTP1;H2AFX;HIF1A;HLA-A;HLA-C;HRAS;HSPG2;IGF1R;IGF2R;JAK1;LATS2;LEF1;LIG3;LLGL1;LTBP4;LZTS1;MAGED1;MALAT1;MAPK1;MAPK14;MDC1;MDM2;MKI67…
Atrial Septal Defects	0.000431046	25	ARVCF;BCOR;CHD7;CREBBP;EFTUD2;EP300;FBN2;FGFR1;FLNB;HSPG2;JAG1;KAT6A;KAT6B;KMT2D;LONP1;MED12;NOTCH2;NSD2;PHGDH;PTPN11;RTN4;SEC24C;SHROOM3;TSHZ1;WASHC5		Hepatocarcinogenesis	4.575e-08	106	AKAP12;AKT1;APC;APEX1;AR;AURKA;AXIN1;BCAR1;CAD;CAV1;CBX5;CCND1;CDH1;CDK2;CDKN1A;CKS1B;CPS1;CREBBP;CSE1L;CTNNB1;CTNND1;CUL7;DCLK1;DLGAP5;DNMT1;EGF;EGFR;EIF2AK2;ERBB2;ESR1;FASN;FGFR1;FN1;GAS5;GJA1;GLI3;GSTP1;HCFC1;HDAC1;HDAC4;HIF1A;HRAS;HSPA4;HSPH1;IGF1R;IGF2BP1;IGF2R;JUN;KDM4B;KIF14;LRP6;MAPK1;MAPK8;MCL1;MDM2;MSH6;MTOR;MYC;NCL;NOTCH1;NOTCH2;NUP98;PEG10;PIK3CA;PIK3CB;PLK1;PPARG;PPP2CA;PPP2R1A;PRDX1…
Conductive hearing loss	0.000431046	25	APC2;ARVCF;DCHS1;EFTUD2;FLII;FLNA;FLNB;FRAS1;GRIP1;IFT140;IFT172;KMT2D;LRP5;NIPBL;NOTCH2;NOTCH3;PRPF6;PRPF8;RAD21;RAI1;SEC24C;SETD2;SMC3;SNRNP200;TSHZ1		Somatic mutation	4.59203e-08	27	AKT1;APC;AXIN1;BCR;BRCA2;CALR;CBL;CREB1;CTNNB1;ERBB2;EWSR1;GNAS;GPC3;IGF2R;JAK2;NF1;NF2;NUMA1;PIK3CA;PTPN11;RARA;RB1;RPS14;SF3B1;SMAD4;TAF15;TP53
Short hands	0.000465455	15	CUL4B;FBN1;FGD1;FGFR1;FLNA;HDAC6;HERC2;IGF1R;INPPL1;KAT6B;ORC1;RAB3GAP2;RAI1;ROR2;SIN3A		Endometrial Neoplasms	4.91812e-08	60	AKT1;APC;AR;ARID1A;ATM;ATR;AURKB;BIRC5;BRAF;BRCA1;BRCA2;CAV1;CCND1;CD44;CDH1;CDKN1A;CHD4;CTNNB1;DDR1;DNMT1;EGFR;EP300;ERBB2;ESR1;GSTP1;HDAC1;HIF1A;HRAS;HSPE1;IGF1R;IRS1;IRS2;JUN;JUP;LLGL1;MAP3K4;MDM2;MLH1;MSH2;MSH6;MTOR;MYC;NCOA3;NME1;NRIP1;PCNA;PIK3C2A;PIK3CA;PIK3R1;POLD1;PPARG;PPIA;PTEN;SDC1;SKP2;TIMP2;TP53;TSC2;VCAN;ZEB1
Malignant neoplasm of prostate	0.000476588	274	ABCA1;ABCC4;ABL1;ACACA;ACO1;ACSL3;AKAP12;AKAP13;ALAS1;ANK2;APAF1;APC;ARHGAP21;ARHGEF12;ARHGEF2;ARVCF;ASAP1;ATAD2;ATM;ATP5A1;BAZ2A;BCAR1;BCR;BIRC6;BLM;BMS1;BRCA1;BRCA2;BRD1;BRD7;BRD8;BUB1;BUD13;CAND1;CCAR2;CDH2;CELSR3;CENPF;CHAF1A;CHD1;CHD8;CLCN3;CLTC;COL4A2;CPT2;CREBBP;CTCF;CTNNB1;CTNND2;DAXX;DCAF1;DDR1;DDX5;DLG5;DLGAP5;DNMT1;DPYSL3;DST;EEF2;EHBP1;EIF3B;EML4;EP300;EPHA3;EPHA7;EPHB2;ERBB2;EXOC4;FA…		Epithelial ovarian cancer	4.91812e-08	195	ABCA1;ABCA2;ABL1;ACTN4;AFDN;AGO2;AKT1;ANXA2;APAF1;APC;APEX1;AR;ARID1A;ASPM;ATG2B;ATM;ATR;AURKA;AURKB;BARD1;BCAR1;BIRC5;BRAF;BRCA1;BRCA2;BRD7;BUB1B;CALM1;CALM2;CALM3;CALR;CAV1;CCNB1;CCND1;CD44;CDC42;CDC7;CDH1;CDK12;CDK2;CDK4;CDKN1A;CHAF1A;CHEK1;COL4A2;CRK;CTCF;CTNNB1;CTR9;DICER1;DNER;DNMT1;EGF;EGFR;EHMT2;EP300;EPHB2;ERBB2;ESR1;EZR;FANCA;FANCC;FANCD2;FANCG;FASN;FEN1;FN1;GMNN;GNAS;GPC3;GSN;GSTP1;GTF…
Malignant neoplasm of lung	0.000480867	230	ABCA1;ABCC4;ABL1;ACACA;ACLY;ACSL3;ACTN4;AKAP9;APAF1;APC;ARHGEF2;ARID2;ASH1L;ASXL1;ATAD2;ATM;ATP2C1;ATR;BAG6;BCAR1;BCR;BIRC6;BLM;BMS1;BPTF;BRCA1;BRCA2;BUB1;CCAR2;CDH2;CLSPN;COL4A2;CRMP1;CTCF;CTNNB1;CTNND1;CTNND2;CUL3;DDR1;DICER1;DNMT1;DPYSL3;DROSHA;DSP;DST;DYNC2H1;EIF3A;EIF4A2;EML4;EPHA3;EPHA7;EPHB2;ERBB2;ESPL1;EWSR1;FAT1;FAT4;FBN2;FGFR1;FLNA;FLNB;FN1;FNDC3A;FUS;GEMIN4;GLDC;GREB1;GSN;HADHA;HDAC2;H…		Schizophrenia	4.91812e-08	293	ABCA1;ACACA;ACLY;ACTG1;ADNP;ADNP2;AGO2;AKAP9;AKT1;ANK3;AP3B1;AP3D1;APC;AR;ARHGAP32;ARHGEF2;ARVCF;ASH2L;ASPM;ATF4;ATM;ATP2B4;ATP5A1;ATP5H;BCL9;BMS1;BRCA1;BRCA2;BRD1;BSN;CABIN1;CAD;CADM3;CALM1;CALM2;CALM3;CALR;CASK;CAV1;CCND1;CCT3;CCT6A;CDC42;CDK4;CDK5;CELSR1;CHD4;CHEK1;CNR1;CPS1;CREB1;CREBBP;CRMP1;CSNK2A1;CTCF;CTNNA2;CTNNB1;CTNND2;CTSC;CYFIP1;DAXX;DCLK1;DDR1;DICER1;DLL1;DNMT1;DROSHA;EFNB2;EGF;EGFR…
Microcephaly	0.00049303	31	ARFGEF2;ASPM;ATM;ATR;BRCA1;CASK;CDK5RAP2;CENPF;CTNNB1;DIAPH1;DYNC1H1;EFTUD2;EOMES;FLNA;IGF1R;KAT6A;KIF11;KIF14;KIF5C;KNL1;NES;ORC1;PCNT;PHGDH;PIK3R1;POLE;PTCH1;SIN3A;SMC3;TRAPPC9;VPS13B		Bilateral fifth finger clinodactyly	5.5285e-08	38	ATR;BAZ1B;BCOR;BCR;BLM;BRAF;CENPE;CLIP2;CREBBP;CUL4B;CUL7;EFNB1;ELN;EP300;FGD1;FLII;FLNB;GJA1;GPC3;GTF2I;HDAC4;JAG1;KMT2A;MAPK1;NIPBL;ORC1;PCNT;RAD21;RAI1;RB1;RFC2;ROR2;SALL1;SHH;SMC1A;SMC3;SNRPB;UBE3A
Severe mental retardation (I.Q. 20-34)	0.00049303	31	ABCA1;ARFGEF2;ARID1B;ATR;ATRX;C2CD3;CASK;CHD7;CTNND2;CUL4B;DYNC1H1;EPC2;FGD1;GLI3;HERC1;HUWE1;IGF1R;KDM5C;KIF1A;NIN;NIPBL;NSD2;PEX1;RAB3GAP2;RAD21;SCAF11;SMC3;SNX14;SPTAN1;UBE3A;UBE3B		Curvature of little finger	5.5285e-08	38	ATR;BAZ1B;BCOR;BCR;BLM;BRAF;CENPE;CLIP2;CREBBP;CUL4B;CUL7;EFNB1;ELN;EP300;FGD1;FLII;FLNB;GJA1;GPC3;GTF2I;HDAC4;JAG1;KMT2A;MAPK1;NIPBL;ORC1;PCNT;RAD21;RAI1;RB1;RFC2;ROR2;SALL1;SHH;SMC1A;SMC3;SNRPB;UBE3A
Hyperplasia of nose	0.00050421	10	ATR;BLM;CENPE;CUL4B;EP300;KAT6B;MED12;NIN;PCNT;ZNF592		Cervix carcinoma	5.75957e-08	169	ABCC4;ABL1;AGO2;AKT1;ANXA2;APEX1;AR;ARID1A;ATM;ATR;AURKA;BARD1;BDP1;BIRC5;BRAF;BRCA1;BRCA2;CALM1;CALM2;CALM3;CALR;CAV1;CCNB1;CCND1;CD44;CDC20;CDC42;CDC6;CDH1;CDK2;CDK4;CDKN1A;CFTR;CHEK1;CLSPN;CTNNB1;CUL4B;CUL5;DICER1;DNMT1;EGF;EGFR;EIF3F;EIF4E;EIF4G2;EPHB2;ERBB2;ESR1;EZR;FANCA;FANCC;FLNB;FN1;GEMIN4;GJA1;GLI3;GNL3;GSN;GSTP1;HDAC6;HECW2;HIF1A;HLA-A;HLA-C;HLTF;HMGA1;HMGB2;HRAS;HSP90AA1;HSPA4;HSPG2;I…
Hypertrophy of nose	0.00050421	10	ATR;BLM;CENPE;CUL4B;EP300;KAT6B;MED12;NIN;PCNT;ZNF592		Muscle hypotonia	7.39409e-08	128	AARS;ABL1;ACACA;ADCY6;ADNP;AHDC1;ANK3;APC2;AR;ARFGEF2;ARID1A;ARVCF;ATP5A1;ATP7A;ATRX;BAZ1B;BCOR;BRAF;CAD;CBL;CHD7;CLIP2;CPS1;CPT2;CREBBP;CTCF;CTNNB1;CTNND2;CUL4B;DCHS1;DHTKD1;DPM1;DYNC1H1;EFNB1;ELN;EP300;ETFA;FASTKD2;FBN1;FIG4;FLII;FMR1;GLDC;GPC3;GTF2I;HADHA;HCFC1;HDAC4;HERC2;HNRNPK;HRAS;HSPD1;IFT140;INPPL1;KANK1;KAT6A;KAT6B;KCNQ3;KIAA0556;KIF1A;KMT2A;KMT2D;LAMB2;LARS;LONP1;LRP5;LRPPRC;MED12;MLH1…
Hypoplasia or absence of the corpus callosum	0.00050421	10	APC2;FGFR1;FLII;GLI3;LRP2;MED12;PEX1;RAB3GAP2;RAI1;SETD2		Promyelocytic leukemia	7.48361e-08	58	ABL1;AKT1;APBB1;ATRX;BCAR1;BCR;BLM;BRCA1;CCNB1;CCND1;CDKN1A;CRK;CSNK2A1;DAXX;DHX9;EGF;EGFR;EHMT2;EIF4E;FEN1;HDAC1;HDAC9;JAG1;JAK2;KAT5;KAT6A;KMT2A;MAPK1;MAPK14;MAPK8;MTOR;MYC;NCOR1;NCOR2;NME1;NPM1;NUP214;ODC1;PBX1;PCNA;POLD1;PPARG;RAD21;RARA;SENP1;SKP2;SLC1A2;SOD1;TERF1;TERF2;THBS1;TP53;USP7;VIM;XAB2;XPR1;ZBTB16;ZMYM2
Large nose	0.00050421	10	ATR;BLM;CENPE;CUL4B;EP300;KAT6B;MED12;NIN;PCNT;ZNF592		Multiple malignancy	8.77329e-08	49	AKT1;AURKA;AURKB;BCAR1;BLM;BRAF;CAV1;CD44;CDK2;CDKN1A;CSE1L;CTNND1;CTTN;EGFR;ERBB2;GLDC;GNAS;HIF1A;HLA-C;HSP90AA1;IGF1R;ILF2;INSR;KDM1A;MAPK8;MCL1;MED12;MTOR;MYC;MYO10;NCL;NCOA3;NME1;PIK3CA;PRKDC;PROM1;PTEN;PTPN11;RAD51;RFC3;RPL39;SETD2;SLU7;SMAD4;SP1;STAT3;TP53;U2AF1;ZBTB16
Peripheral Neuropathy	0.00050421	42	AARS;ABCA1;ACTG1;ATP7A;CUL4B;DSP;DST;EPHB2;FIG4;FLNC;GARS;GSN;HADHA;HDAC6;HK1;IARS2;IGF1R;IMMT;INSR;KARS;KIF1A;KIF1B;KIF5A;KMT2D;LYST;MAP4;MFN2;MKI67;MYO5A;NF2;OPA1;PEX5;PNPLA6;POLG;PTPN13;SACS;SBF1;SETX;SLC12A6;SPAST;VPS13A;WNK1		Acute Promyelocytic Leukemia	8.84065e-08	92	ABCA1;ABL1;AKT1;ANXA2;ASXL1;ATRX;AURKB;BCAR1;BCOR;BCORL1;BCR;BLM;CAD;CCNB1;CD44;CDKN1A;CREB1;CTCF;DAXX;DHX9;EGF;EGFR;EHMT2;EIF4G2;EPHB2;ERBB2;FEN1;FGFR1;GLI2;GSK3B;HDAC1;HDAC9;HIF1A;HK1;HLA-C;HSPG2;JAG1;JAK1;JAK2;KMT2A;LEF1;MAPK1;MAPK14;MAPK8;MCL1;MTOR;MYC;MYCBP2;NCAM1;NCOR1;NCOR2;NME1;NOTCH1;NPM1;NUMA1;NUP214;NUP43;NUP98;ODC1;PAFAH1B1;PBX1;PCNA;PIK3CA;PIK3CB;POLD1;PPARG;PRDX4;PROM1;PTPN11;RARA;R…
Herpes Simplex Infections	0.00050586	62	AFDN;APC;ATM;ATR;ATRX;BRCA2;CPS1;CTCF;DCAF1;EIF4A2;EIF4G1;EIF4G2;EPHA3;ERBB2;ERBIN;FANCD2;FASN;FLNB;GEMIN4;GLI3;HCFC1;HDAC5;HSPA4;HSPA8;HSPA9;KDM1A;KDM4A;KIF23;MTOR;NES;NOS2;NPEPPS;NUMA1;NUP214;ODC1;PARG;PDZD8;PHGDH;PIK3CA;PIK3CB;POLD1;PSMD2;RBBP6;RBL2;RPA1;SALL1;SLU7;SMARCA5;SMC4;SRRM2;STAT1;STAT3;TBC1D9;TNKS;TNKS2;TYRO3;UBE3B;USP7;VCP;WDTC1;XRCC5;XRCC6		Decreased projection of maxilla	8.84065e-08	28	AKT1;CDC6;CREBBP;DCHS1;EFTUD2;EP300;FBN1;FGD1;FGFR1;FLNB;GJA1;GLI2;KDM5C;LRP6;MED12;ORC1;PIK3CA;POLR1A;PTCH1;PTEN;RAB3GAP2;RUNX2;SEC23A;SF3B4;SLC12A6;SMAD4;UBE3A;ZBTB20
Leukemogenesis	0.00054096	82	ABL1;AFDN;AP2A1;APAF1;APC;ASXL1;ATF7IP;ATM;ATR;BCR;BUB1;CASP8AP2;CCAR2;CEBPZ;CREBBP;CTCF;CTNNA1;CTNNB1;DDR1;DNMT1;EIF4A2;EIF4G1;EP300;EPHB2;FANCD2;FAT3;FBXO11;FGFR1;FLII;FUS;GSN;HDAC2;HIF1A;HSPG2;JAG1;JAK1;KAT6A;KAT6B;KDM1A;KDM3B;KDM5B;KMT2A;KMT2B;KMT2C;KMT2D;LONP1;MAP3K1;MCM3AP;MSH2;MTOR;NCOA2;NCOA3;NCOR1;NCOR2;NOS2;NOTCH1;NOTCH3;NUP214;NUP98;PIK3CA;PIK3CB;PRDM16;PTPN11;RB1;RBL2;RNF20;SALL4;SETD…		Deficiency of upper jaw bones	8.84065e-08	28	AKT1;CDC6;CREBBP;DCHS1;EFTUD2;EP300;FBN1;FGD1;FGFR1;FLNB;GJA1;GLI2;KDM5C;LRP6;MED12;ORC1;PIK3CA;POLR1A;PTCH1;PTEN;RAB3GAP2;RUNX2;SEC23A;SF3B4;SLC12A6;SMAD4;UBE3A;ZBTB20
Henoch-Schoenlein Purpura	0.00059193	20	ABCA1;GBA2;HSPA4;HSPD1;KIF1A;KIF1B;KIF1C;KIF5A;KIF5B;KIF5C;NOS2;PNPLA6;SEC24D;SPAST;SPG11;TECPR2;TIMELESS;VCP;WASHC5;ZFYVE26		Hypoplasia of the maxilla	8.84065e-08	28	AKT1;CDC6;CREBBP;DCHS1;EFTUD2;EP300;FBN1;FGD1;FGFR1;FLNB;GJA1;GLI2;KDM5C;LRP6;MED12;ORC1;PIK3CA;POLR1A;PTCH1;PTEN;RAB3GAP2;RUNX2;SEC23A;SF3B4;SLC12A6;SMAD4;UBE3A;ZBTB20
Coarse hair	0.00059193	11	ATP7A;COL4A3BP;FLNA;INSR;KAT6B;NOTCH3;PTPN11;SEC23A;SMARCAL1;SOS1;SOS2		Hypotrophic maxilla	8.84065e-08	28	AKT1;CDC6;CREBBP;DCHS1;EFTUD2;EP300;FBN1;FGD1;FGFR1;FLNB;GJA1;GLI2;KDM5C;LRP6;MED12;ORC1;PIK3CA;POLR1A;PTCH1;PTEN;RAB3GAP2;RUNX2;SEC23A;SF3B4;SLC12A6;SMAD4;UBE3A;ZBTB20
Defective enamel matrix	0.00059193	11	ATR;CREBBP;EP300;FLNB;GNAS;LONP1;NF1;OCRL;PCNT;PEX1;PLEC		Maxillary retrognathia	8.84065e-08	28	AKT1;CDC6;CREBBP;DCHS1;EFTUD2;EP300;FBN1;FGD1;FGFR1;FLNB;GJA1;GLI2;KDM5C;LRP6;MED12;ORC1;PIK3CA;POLR1A;PTCH1;PTEN;RAB3GAP2;RUNX2;SEC23A;SF3B4;SLC12A6;SMAD4;UBE3A;ZBTB20
Dysplasia of tooth enamel	0.00059193	11	ATR;CREBBP;EP300;FLNB;GNAS;LONP1;NF1;OCRL;PCNT;PEX1;PLEC		Retrusion of upper jaw bones	8.84065e-08	28	AKT1;CDC6;CREBBP;DCHS1;EFTUD2;EP300;FBN1;FGD1;FGFR1;FLNB;GJA1;GLI2;KDM5C;LRP6;MED12;ORC1;PIK3CA;POLR1A;PTCH1;PTEN;RAB3GAP2;RUNX2;SEC23A;SF3B4;SLC12A6;SMAD4;UBE3A;ZBTB20
Rough hair texture	0.00059193	11	ATP7A;COL4A3BP;FLNA;INSR;KAT6B;NOTCH3;PTPN11;SEC23A;SMARCAL1;SOS1;SOS2		Carcinoma, Papillary	8.88229e-08	58	AKAP9;AKT1;ATM;BRAF;BRCA1;BRCA2;CCND1;CD44;CDH1;CREB1;EGF;EGFR;EIF2AK2;EIF4E;ERBB2;ERBIN;ESR1;FBN2;FN1;GAS1;GNAS;GPC3;GSTP1;HDAC1;HDAC2;HDAC6;HIF1A;HLA-C;HLTF;HRAS;HSP90AA1;HSPG2;MDM2;MLH1;NAA15;NBR1;NCAM1;NPC2;PHB;PIK3CA;PKD1;PLK1;PPARG;PRKDC;PTCH1;PTEN;RAD51;RASA1;RUNX2;SETD2;SMAD4;STAT3;TJP1;TP53;TSC2;TTF1;VHL;WDR3
Thin dental enamel	0.00059193	11	ATR;CREBBP;EP300;FLNB;GNAS;LONP1;NF1;OCRL;PCNT;PEX1;PLEC		Endometrial Carcinoma	8.9327e-08	136	AFDN;AKT1;ANXA2;APC;APEX1;AR;ARID1A;ATAD2;ATM;AURKA;AURKB;BARD1;BIRC5;BRAF;BRCA1;BRCA2;BRD7;BUB1B;CAD;CAV1;CCNB1;CCND1;CD44;CDH1;CDK2;CDK4;CDKN1A;CHEK1;CREBBP;CTCF;CTNNB1;CTNND1;DDR1;DICER1;DNMT1;DROSHA;EGF;EGFR;EIF4E;EP300;EPHB2;ERBB2;ESR1;EZR;FANCD2;FASN;FEN1;GAS5;GSTP1;H2AFX;HDAC9;HIF1A;HRAS;HSD17B4;HSP90AA1;IGF1R;IGF2R;INSR;INTS2;IPO8;JAK1;KDM4A;KDM4B;LAMC1;LEF1;LLGL1;LRP1;LRPPRC;MALAT1;MAP3K…
Primary malignant neoplasm of lung	0.00062344	201	ABCA1;ABCC4;ABL1;ACACA;ACLY;ACSL3;ACTN4;APAF1;APC;ARHGEF2;ASH1L;ASXL1;ATM;ATP2C1;ATR;BAG6;BCAR1;BCR;BMS1;BPTF;BRCA1;BRCA2;BUB1;CDH2;CLSPN;COL4A2;CRMP1;CTCF;CTNNB1;CTNND1;CTNND2;CUL3;DDR1;DICER1;DNMT1;DPYSL3;DROSHA;DSP;DST;EIF3A;EIF4A2;EML4;EPHA3;EPHA7;EPHB2;ERBB2;ESPL1;FAT1;FAT4;FBN2;FGFR1;FLNA;FLNB;FN1;FNDC3A;FUS;GLDC;GREB1;GSN;HADHA;HDAC2;HDAC3;HIF1A;HK1;HSPA4;HSPA8;HSPA9;HSPG2;HUWE1;IGF1R;IGF2…		Pancreatic carcinoma, familial	9.56648e-08	14	ATM;BRCA1;BRCA2;CCND1;CDK2;CDKN1A;CFTR;FANCC;FANCG;MLH1;MSH2;PALB2;SMAD4;TP53
Speech Delay	0.000670422	26	AFF2;CREBBP;DHTKD1;EFTUD2;EP300;FGFR1;FLII;FLNA;HERC2;HUWE1;IFT172;IGF1R;KAT6B;KDM5C;KMT2A;LEMD3;LRPPRC;NF1;NIPBL;NSD2;PEX1;PIK3R1;RAI1;SIN3A;SPTBN2;UBE3A		Decreased projection of midface	9.73871e-08	38	AGL;ATRX;BRAF;BUB1B;CUL7;DCHS1;EFTUD2;ELN;FGFR1;FLII;FLNA;FLNB;GLI2;HDAC4;KAT6B;KIF1A;LRP2;LRPPRC;LTBP4;MEGF8;NF1;OBSL1;PTPN11;RAB3GAP2;RAI1;ROR2;RPS28;RUNX2;SEC23A;SEC24D;SERPINH1;SF3B4;SHH;SMAD4;SOS1;SOS2;ZBTB20;ZNF592
Peripheral axonal neuropathy	0.00073524	10	AARS;ABCA1;CCT5;KIF1A;KIF1B;MARS;MFN2;OPA1;PNPLA6;SLC12A6		Hypotrophic midface	9.73871e-08	38	AGL;ATRX;BRAF;BUB1B;CUL7;DCHS1;EFTUD2;ELN;FGFR1;FLII;FLNA;FLNB;GLI2;HDAC4;KAT6B;KIF1A;LRP2;LRPPRC;LTBP4;MEGF8;NF1;OBSL1;PTPN11;RAB3GAP2;RAI1;ROR2;RPS28;RUNX2;SEC23A;SEC24D;SERPINH1;SF3B4;SHH;SMAD4;SOS1;SOS2;ZBTB20;ZNF592
Ovarian Carcinoma	0.000748277	193	ABCA1;ABCA2;ABL1;ACACA;ACTN4;AFDN;AKAP12;AKAP13;APAF1;APC;APC2;ARID1A;ASPM;ATM;ATP7A;ATR;BCAR1;BCL9;BLM;BRCA1;BRCA2;BRD7;CABIN1;CDK12;CHAF1A;CHD4;CLSPN;COL4A3BP;CREBBP;CSE1L;CTCF;CTNNB1;CTNND1;CTNND2;CTR9;CUL3;CYFIP2;DAXX;DCAF1;DDB1;DDR1;DDX1;DICER1;DNMT1;DOCK1;DROSHA;DST;EIF3A;EML4;EP300;EPB41;EPHA3;EPHB2;ERBB2;ESPL1;EWSR1;FANCD2;FASN;FBN1;FBN2;FBN3;FGFR1;FN1;GIT1;GLI2;GNAS;GREB1;GTF2I;HDAC2;HDA…		Midface retrusion	9.73871e-08	38	AGL;ATRX;BRAF;BUB1B;CUL7;DCHS1;EFTUD2;ELN;FGFR1;FLII;FLNA;FLNB;GLI2;HDAC4;KAT6B;KIF1A;LRP2;LRPPRC;LTBP4;MEGF8;NF1;OBSL1;PTPN11;RAB3GAP2;RAI1;ROR2;RPS28;RUNX2;SEC23A;SEC24D;SERPINH1;SF3B4;SHH;SMAD4;SOS1;SOS2;ZBTB20;ZNF592
Central neuroblastoma	0.000752614	164	ABCA1;ABCA2;ABCC4;ACO1;ACTG1;ACTN4;AGTPBP1;ANK2;APAF1;APC;ARFGEF2;ARHGAP32;ARHGEF2;ARID1A;ARID1B;ASH1L;ATM;ATP7A;ATR;ATRX;BCAR1;BCR;BIRC6;BRCA1;CEBPZ;CENPE;CHAF1A;CIC;CNOT1;CREBBP;CRMP1;CTNNB1;CUL1;CUL7;DDX1;DHX9;DICER1;DLGAP5;EIF4G2;ENC1;EPHA3;EPHB2;ERBB2;EWSR1;FBXW11;FGFR1;FN1;FRYL;FUS;GAS1;GLI2;GNAS;GRAMD4;GRK2;HDAC2;HDAC3;HDAC5;HDAC6;HERC2;HIF1A;HSPA4;HSPA8;HSPA9;HSPD1;HTT;IDE;IGF1R;IGF2BP1;I…		Small midface	9.73871e-08	38	AGL;ATRX;BRAF;BUB1B;CUL7;DCHS1;EFTUD2;ELN;FGFR1;FLII;FLNA;FLNB;GLI2;HDAC4;KAT6B;KIF1A;LRP2;LRPPRC;LTBP4;MEGF8;NF1;OBSL1;PTPN11;RAB3GAP2;RAI1;ROR2;RPS28;RUNX2;SEC23A;SEC24D;SERPINH1;SF3B4;SHH;SMAD4;SOS1;SOS2;ZBTB20;ZNF592
Congenital chromosomal disease	0.000756023	61	ABL1;APC;ASXL1;ATM;BCR;BLM;BRCA1;BRCA2;CHD7;DOCK1;ERBB2;EWSR1;FANCD2;FANCI;FBN2;FGFR1;GLI2;GLI3;HLTF;IGF1R;INTS1;KAT6A;KAT6B;KMT2A;KMT2D;MED12;MIB1;MKI67;MSH2;MSH6;MTOR;MTR;NCOA2;NCOA3;NF2;NOTCH1;NSD2;NUP214;NUP98;PARP1;PCNT;PIK3CA;PIK3CB;PTCH1;PTPN11;PTPRD;PTPRU;RALGAPB;RB1;SETD2;SF3B1;SPTBN1;TBC1D9;TNS3;TOPBP1;TP53BP1;TYRO3;USP1;WDR48;XRCC5;XRCC6		Head and Neck Neoplasms	9.73871e-08	76	APEX1;AR;ATP5A1;AURKA;BIRC5;BIRC6;BRCA1;CAV1;CCND1;CD44;CDC7;CDH1;CDH2;CDK4;CDKN1A;CTNNB1;DICER1;DROSHA;EGF;EGFR;EIF4E;ERBB2;FANCD2;FANCG;FAT1;FEN1;GEMIN4;GNAS;GPX1;GSTP1;HIF1A;IGF1R;IGF2BP1;KMT2A;LIG3;LZTS1;MAPK1;MDM2;MKI67;MLH1;MRPL11;MSH2;MTR;NDUFA6;NME1;NOS2;NOTCH1;PCNA;PLK1;POLB;PTPN13;RAD17;RAD51;RAN;RB1;RGS12;RICTOR;ROBO1;RPA1;RPS6KB1;RRM1;RXRA;SETD1A;SMAD3;SMC1B;SP1;STAT3;STAT5B;TAX1BP1;T…
Somatic mutation	0.000774744	16	APC;BCR;BRCA2;CTNNB1;ERBB2;EWSR1;GNAS;IGF2R;NF1;NF2;NUMA1;PIK3CA;PTPN11;RB1;SF3B1;TAF15		Cutaneous Melanoma	1.03704e-07	60	AKT1;APAF1;APEX1;AR;AURKB;BRAF;BRCA1;BRCA2;CCND1;CD44;CDK2;CDK4;CHAF1A;CREB1;CTNNB1;EGF;EPHB2;FANCA;FASN;GSTP1;HLA-A;HLA-C;HRAS;KDM5A;MAP2;MAPK1;MCM3;MCM4;MCM6;MCM7;MDM2;MIB1;MKI67;MLH1;MSH2;MYC;NCOA1;NCOA3;NF1;NME1;NOS2;PARP1;PCNA;PLEKHM2;PRDM16;PRDX6;PREX2;PROM1;PTEN;RAC1;RXRA;SETDB1;SNW1;SRC;STAT3;SYNE1;TOP2A;TP53;VDR;VIM
Agenesis of corpus callosum	0.000817431	41	ACACA;AMER1;APC;ATM;BMS1;BRCA1;CAD;CDK5RAP2;CENPF;CPT2;CREBBP;CTNNB1;DICER1;EP300;ERBB2;FGFR1;FIG4;GLDC;GLI3;IGF1R;JAG1;KAT6B;KIF14;LONP1;LRP2;MED12;MMRN1;MTOR;NOTCH1;NUMA1;PHGDH;PIK3CA;PIK3CB;PTCH1;RRM1;SIN3A;SLC12A6;SPEN;STAT3;TOP2A;VCAN		polyps	1.05506e-07	58	APC;ASPM;AURKA;AURKB;BRAF;CALR;CCND1;CDH1;CDK4;CDKN1A;CFTR;CTNNB1;DCLK1;EGF;EGFR;EIF3A;EIF4E;ERBB2;ESR1;GNAS;HDAC1;HDAC2;HMGA1;HSP90AA1;HTT;JAG1;JUN;MDM2;MIB1;MKI67;MLH1;MSH2;MSH3;MSH6;MTOR;NBAS;NME1;NOS2;ODC1;PAK1;PARP1;PIK3CA;PPARG;PTEN;RELA;RPL29;SHH;SIRT1;SMAD2;SMAD4;SPHK1;STAT3;THBS1;TP53;VDR;VIM;WNK1;ZEB1
Enamel abnormalities	0.000819051	11	ATR;BAZ1B;CENPE;CLIP2;CUL7;DSP;GTF2I;LONP1;OBSL1;PCNT;SEC24D		Nasopharyngeal carcinoma	1.11499e-07	127	ABCA1;ADAMTS9;AGO2;AKT1;ANXA2;APC;ARID1A;ATM;AURKB;BIRC5;BLM;BRCA1;BRCA2;BRD7;BTRC;BUB1B;CAD;CAV1;CCNB1;CCND1;CD44;CDC42;CDH1;CDK2;CDK4;CDKN1A;CENPF;CHEK1;CLCN3;COL17A1;CREB1;CREBBP;CRK;DDR1;DICER1;DNMT1;DROSHA;DST;EGF;EGFR;EIF3A;EIF4E;EIF4G1;EPHB2;ERBB2;ESR1;EZR;FASN;FGFR1;FLNA;FN1;GJA1;GSK3B;GSTP1;HDAC1;HDAC2;HIF1A;HLA-A;HLA-C;HNRNPK;HRAS;HSPA4;INTS2;IQGAP1;JAK2;JUN;KDM3A;KIF1A;KMT2C;LRIG1;MALA…
Low anterior hairline	0.000819051	11	ANKRD11;CREBBP;EP300;LRPPRC;NIPBL;PACS1;RAB3GAP2;RAD21;SLC12A6;SMC3;TECPR2		Carcinoma breast stage IV	1.17037e-07	77	ABL1;AKAP13;AKT1;AR;BCAR1;BIRC5;BRCA1;BRCA2;CBX5;CCND1;CD44;CDC42;CDH1;CDK4;CRK;DNMT1;EGF;EGFR;EIF4E;EIF4G1;ERBB2;ESR1;FASN;FGFR1;FN1;GIT1;GJA1;GLI2;HDAC1;HDAC3;HIF1A;HK1;HLA-C;HMGA1;HSP90AA1;IGF1R;ITGA6;KAT5;KIAA0100;MAPK1;MAPK14;MDM2;MMRN1;MTOR;MYC;NDUFB9;NES;NME1;NOTCH1;PCNA;PIK3CA;PIK3CB;PLK1;POLD1;PROM1;PTEN;PTK2;PTPRF;PTPRU;RB1;RRM1;RUNX2;SASH1;SETD2;SMAD2;SMAD3;SMG1;SP1;SRC;STAT3;TBC1D9;TO…
Steroid resistant nephrotic syndrome of childhood	0.000828419	9	ACTN4;CRB2;FAT1;NUP107;NUP205;NUP93;SMARCAL1;TBC1D9;XPO5		Transitional cell carcinoma of bladder	1.28059e-07	40	AKT1;APAF1;APC;AR;BRAF;BUB1B;CAV1;CCND1;CD44;CDH1;CREB1;CTNNB1;EGF;EGFR;EP300;EPHB2;ERBB2;GSTP1;HIF1A;MAPK8;MCM2;MSH2;MSH3;MSH6;MTR;NME1;PCNA;PIK3CA;PTCH1;PTEN;RB1;RBX1;RSF1;SDC1;SPAG9;SRC;STAT3;TP53;VIM;XPO5
Breast Cancer, Familial Male	0.000841608	5	BRCA1;BRCA2;ERBB2;HIF1A;PIK3CA		Juvenile Myelomonocytic Leukemia	1.28059e-07	36	ABL1;AKAP12;AKT1;ANXA2;AR;ASXL1;BCR;BRAF;CALR;CBL;CREB1;EPHB2;JAK2;KDM1A;KMT2A;MAPK1;MYH9;NACA;NF1;NUP98;PAFAH1B1;PIK3CA;PIK3CB;PIK3R1;PPP1R12C;PTEN;PTPN11;SF3B1;SOS1;SRC;SRSF2;STAT3;STAT5B;TP53;U2AF1;YWHAE
Pure hereditary spastic paraplegia	0.000841608	5	KIF5A;KIF5B;KIF5C;PNPLA6;SPAST		Mesothelioma	1.28397e-07	84	ABCA1;ABCA2;ABCC4;ACACA;AHNAK;AKT1;APC;AURKA;BIRC5;BMS1;BRAF;BRCA1;BRCA2;CALM1;CALM2;CALM3;CD44;CDH1;CDK2;CDK4;CDKN1A;CHEK1;CTNNB1;EGF;EGFR;EIF4A2;EIF4E;EIF4G1;EPHB2;ESR1;ETFA;EWSR1;F8;FANCD2;FGFR1;FLNB;FYN;GAS5;GJA1;GPC3;GSN;HDAC1;HDAC2;HDAC9;HIF1A;HSPA4;IGF1R;MAPK1;MAPK14;MAPK8;MDM2;MKI67;MTOR;NBR1;NF1;NF2;NOTCH1;NOTCH2;PCNA;PIK3CA;PIK3CB;PKN1;PLXNA1;PPARG;PTEN;RAN;RELA;REV3L;SDC1;SETDB1;SHH;SM…
Unilateral Breast Neoplasms	0.000841608	5	ATM;BRCA1;BRCA2;ERBB2;PALB2		ovarian neoplasm	1.38294e-07	160	ACTN4;AKAP13;AKT1;APC;APEX1;AR;ARID1A;ATM;ATP7A;AURKA;BARD1;BCAR1;BCL9;BCR;BIRC5;BRAF;BRCA1;BRCA2;CAV1;CCND1;CD44;CDC42;CDH1;CDK2;CDK4;CDKN1A;COL4A2;CREB1;CTCF;CTNNA1;CTNNB1;CTTN;DDR1;DDX1;DDX5;DICER1;DNMT1;DROSHA;EEF1A1;EGF;EGFR;EIF4E;EPB41;EPHB2;ERBB2;ESR1;FANCA;FANCD2;FASN;FN1;GJA1;GLI3;GPC3;GRB2;GREB1;GSK3B;GSTP1;H3F3B;HDAC3;HDAC6;HIF1A;HLTF;HMGA1;HRAS;IDE;IGF2BP1;IGF2R;INSR;IQGAP1;IRS1;JAG1;…
Axonal neuropathy	0.000860696	15	AARS;ABCA1;ATP7A;CCT5;GARS;KIF1A;KIF1B;KIF5A;MARS;MFN2;PNPLA6;POLG;SLC12A6;SPG11;ZFYVE26		Adult T-Cell Lymphoma/Leukemia	1.50344e-07	89	ABL1;AKT1;APC;ASPM;ATF7IP;ATM;BCR;BIRC5;BUB1;BUB1B;CCNB1;CCND1;CD44;CDK2;CDKN1A;CREB1;CREBBP;CSNK2A1;CTCF;EIF3E;EIF4E;EIF4G2;EPHB2;FN1;FYN;GEMIN4;GSN;HLA-A;HLA-C;HMGA1;HNRNPA2B1;HNRNPC;HSP90AA1;IARS;IFT172;JAK1;JAK2;JUN;KAT5;KMT2C;LCK;LRP1;MAGI1;MAPK1;MCL1;MDM2;MLH1;MSH2;MSH3;MSH6;MUM1;MYC;NCAM1;NOS2;NOTCH1;PCNA;PIK3CA;PIK3CB;PLCG1;PRDM16;PSMD2;PTEN;PTPN13;RELA;RPSA;RTN4;SERPINH1;SIRT1;SMAD3;SMAR…
Triangular head shape	0.000931285	6	C2CD3;EFTUD2;FGFR1;GLI3;PTCH1;RB1		Malignant Peripheral Nerve Sheath Tumor	1.64765e-07	49	AKT1;ATRX;AURKA;BIRC5;BRAF;BRCA1;BRCA2;BUB1B;CALM1;CALM2;CALM3;CCND1;CD44;CDK4;CUL1;EGF;EGFR;EPHB2;ERBB2;ESR1;EXOC4;FN1;HDAC9;HIF1A;HMGA1;IGF1R;ITGB8;KPNB1;MAPK1;MAPK8;MDM2;MTOR;NES;NF1;PAK1;PARP1;PCNA;PTEN;PTPN11;RAC1;RASA1;RB1;RPS6;SPTBN2;STAT3;TBC1D9;TOP2A;TP53;TRIO
Trigonocephaly	0.000931285	6	C2CD3;EFTUD2;FGFR1;GLI3;PTCH1;RB1		Isochromosomes	1.67732e-07	20	ASXL1;ATM;ATR;BCAR1;BCR;CAD;CBL;CSE1L;CTNND1;EXOSC6;HLA-C;JAK2;LDHB;MYC;PAFAH1B1;SF3B1;SHH;SMC1A;TP53;YWHAE
Wedge shaped head	0.000931285	6	C2CD3;EFTUD2;FGFR1;GLI3;PTCH1;RB1		Residual Cancer	1.70578e-07	11	CALM1;CALM2;CALM3;ESR1;FANCC;HIF1A;PROM1;SHH;TP53;TP53BP1;VIM
Pulmonary Stenosis	0.000953247	14	BAZ1B;BCOR;CHD7;CLIP2;FBN1;GTF2I;JAG1;NF1;NOTCH1;PTPN11;SOS1;SOS2;STAT3;WASHC5		Acquired scoliosis	1.83694e-07	76	AKT1;ALMS1;ARID1A;ATR;BRAF;BRCA2;CREBBP;CTBP1;CTNND2;CUL4B;DCHS1;EFNB1;ELN;EP300;FANCA;FANCC;FANCD2;FANCG;FANCI;FBN1;FBN2;FGD1;FLII;FLNA;FLNB;FMR1;GARS;GPC3;HERC2;HNRNPK;HSD17B4;HSPG2;IARS2;KAT6B;KIF5A;KMT2D;LONP1;MED12;MFN2;NF1;NOTCH2;NOTCH3;NSD2;OCRL;PCNT;PIK3CA;POLD1;PTCH1;PTEN;PTPN11;RAB3GAP2;RAD51;RAI1;RASA1;ROR2;RUNX2;SBF1;SEC23A;SEC24D;SERPINH1;SF3B4;SIN3A;SLC12A6;SMAD3;SMARCA4;SNRPB;SOS1;…
leukemia	0.000953247	178	ABCA1;ABCC4;ABL1;ACACA;ACTG1;ADAR;AFDN;AKAP13;AP2A1;APAF1;APC;ARHGEF12;ARHGEF2;ARID1A;ASPM;ASXL1;ATF7IP;ATM;ATR;ATRX;BCAR1;BCR;BLM;BRCA1;BRCA2;BUB1;CEBPZ;CLCN3;CREBBP;CRMP1;CSE1L;CTCF;CTNNA1;CTNNB1;CTNND1;DAXX;DDR1;DHX32;DIAPH1;DICER1;DNMT1;DROSHA;EHMT1;EIF3A;EIF4A2;EP300;EPC2;EPHB2;ERBB2;ESPL1;EWSR1;FANCD2;FAT1;FGFR1;FLII;FN1;FRYL;FUS;GLI3;GNAS;GSN;HCFC1;HDAC5;HDAC6;HIF1A;HSPA4;HSPA9;HTT;IGF1R;I…		Short neck	1.83694e-07	44	ARVCF;ATRX;BRAF;BUB1B;CBL;CDK5;CTNND2;CUL4B;CUL7;EFNB1;FBN2;FGD1;FGFR1;FLNB;GNAS;GPC3;HRAS;HSPG2;INPPL1;MED12;MEGF8;NBAS;NF1;NIPBL;NOTCH2;NOTCH3;OBSL1;PAFAH1B1;PHGDH;PTCH1;PTPN11;RAD21;RB1;RPS19;SEC24C;SMAD4;SMARCAL1;SMC1A;SMC3;SOS1;SOS2;TECPR2;UBA1;YWHAE
Neuroblastoma	0.000973306	169	ABCA1;ABCA2;ABCC4;ACO1;ACTG1;ACTN4;AGTPBP1;ANK2;APAF1;APC;ARFGEF2;ARHGAP32;ARHGEF2;ARID1A;ARID1B;ASH1L;ATM;ATP7A;ATR;ATRX;BCAR1;BCR;BIRC6;BRCA1;CEBPZ;CENPE;CHAF1A;CHD6;CIC;CNOT1;CREBBP;CRMP1;CTNNB1;CUL1;CUL7;DDX1;DHX9;DICER1;DLGAP5;EIF4G2;ENC1;EPB41;EPHA3;EPHB2;ERBB2;EWSR1;FBXW11;FGFR1;FN1;FRYL;FUS;GAS1;GLI2;GNAS;GRAMD4;GRK2;HDAC2;HDAC3;HDAC5;HDAC6;HERC2;HIF1A;HSPA4;HSPA8;HSPA9;HSPD1;HTT;IDE;IGF1…		Astrocytoma	1.89924e-07	137	ACTN1;ACTN4;ADAR;AKAP12;AKT1;ANXA2;APC;AR;ATM;ATRX;BIRC5;BRAF;BTRC;CALM1;CALM2;CALM3;CALR;CAV1;CCND1;CD44;CDC42;CDH1;CDK2;CDK4;CDK5;CDK9;CDKN1A;CIC;CNR1;CREB1;CRK;CTNNA1;DMXL1;DNMT1;EFNB1;EFNB2;EGF;EGFR;EIF3A;EPHB2;ERBB2;ESR1;FGFR1;FN1;GJA1;GLI3;GNL3;GOLGA4;GSN;GSTP1;H2AFX;H3F3A;HIF1A;HLA-C;HRAS;HSPD1;IGF1R;JAK2;KIF14;LATS2;LSM4;MAP2;MAPK1;MAPK14;MAPK8;MCL1;MDM2;MIB1;MIOS;MKI67;MLH1;MMRN1;MSH2;MS…
Bowed and upward slanting eyebrows	0.00103605	13	BCR;CREBBP;EP300;KMT2D;LRPPRC;MEGF8;NIPBL;NSD2;PACS1;RAD21;SIN3A;SMC3;SZT2		Byzanthine arch palate	1.89924e-07	58	AKT1;ANKRD11;APC2;ATP7A;ATR;ATRX;BRAF;CASK;CLP1;CPT2;CREBBP;CTNND2;CUL4B;DCHS1;EFNB1;EP300;FBN1;FBN2;FGFR1;FLNA;GLI3;HNRNPK;HRAS;HSD17B4;HSPG2;INSR;KAT6B;KMT2A;KMT2D;MED12;MEGF8;NIPBL;NOTCH2;NOTCH3;ORC1;PCLO;PEX1;PEX5;PIK3CA;PTEN;PTPN11;RAB3GAP2;RAD21;RBM10;RPS19;RUNX2;SEC24D;SETD2;SIN3A;SLC12A6;SMAD3;SMC1A;SMC3;SNRPB;SOS1;SOS2;STAT3;ZNF592
Thick, flared eyebrows	0.00103605	13	BCR;CREBBP;EP300;KMT2D;LRPPRC;MEGF8;NIPBL;NSD2;PACS1;RAD21;SIN3A;SMC3;SZT2		DYSFUNCTION - SKIN DISORDERS	1.90179e-07	306	AARS;ABCA1;ABCA3;ABCC4;ACTN4;ADGRV1;ADNP;AGTPBP1;AKT1;ALMS1;ALS2;AMPH;ANK2;AP3B1;APAF1;APC;APEX1;AR;ARHGEF2;ATF7IP;ATM;ATP13A2;ATP1A1;ATP2B1;ATP2B4;ATP7A;ATR;ATRX;AURKB;BAZ1B;BIRC5;BRAF;BRCA1;BRCA2;BUB1;BUB1B;CABIN1;CALM1;CALM2;CALM3;CALR;CAPN1;CAV1;CBX5;CCAR2;CCND1;CDC20;CDC42;CDH1;CDK4;CDK5;CDK9;CDKN1A;CFTR;CHD7;CHEK1;CLIP2;CLP1;CNR1;COL17A1;CREB1;CREBBP;CRK;CRMP1;CTCF;CTNNB1;CUL1;DAXX;DCAF1;DC…
Prominent eyes	0.00103796	21	CREBBP;EP300;FGFR1;FIG4;FLNA;FLNB;INSR;JAG1;KAT6B;LRP2;NBAS;NIPBL;NSD2;PHGDH;POLD1;PTPN11;ROR2;SEC24D;SOS1;SOS2;TTC37		Short nose	1.90179e-07	43	ADNP;ATRX;BAZ1B;BLM;BRAF;BUB1B;CASK;CCDC88A;CLIP2;CLP1;EFTUD2;ELN;FBN1;FGD1;FGFR1;FLII;FLNA;FLNB;GJA1;GLI3;GPC3;GTF2I;HDAC6;INPPL1;KIF1A;LONP1;LRP2;NIPBL;PAFAH1B1;PTCH1;PTEN;RAB3GAP2;RAD21;RAI1;RFC2;ROR2;SIN3A;SLC12A6;SMC1A;SMC3;UBA1;WASHC5;YWHAE
Prominent globes	0.00103796	21	CREBBP;EP300;FGFR1;FIG4;FLNA;FLNB;INSR;JAG1;KAT6B;LRP2;NBAS;NIPBL;NSD2;PHGDH;POLD1;PTPN11;ROR2;SEC24D;SOS1;SOS2;TTC37		Small nose	1.90179e-07	43	ADNP;ATRX;BAZ1B;BLM;BRAF;BUB1B;CASK;CCDC88A;CLIP2;CLP1;EFTUD2;ELN;FBN1;FGD1;FGFR1;FLII;FLNA;FLNB;GJA1;GLI3;GPC3;GTF2I;HDAC6;INPPL1;KIF1A;LONP1;LRP2;NIPBL;PAFAH1B1;PTCH1;PTEN;RAB3GAP2;RAD21;RAI1;RFC2;ROR2;SIN3A;SLC12A6;SMC1A;SMC3;UBA1;WASHC5;YWHAE
Protruding eyes	0.00103796	21	CREBBP;EP300;FGFR1;FIG4;FLNA;FLNB;INSR;JAG1;KAT6B;LRP2;NBAS;NIPBL;NSD2;PHGDH;POLD1;PTPN11;ROR2;SEC24D;SOS1;SOS2;TTC37		Lip and Oral Cavity Carcinoma	1.93265e-07	89	AKT1;APC;AR;ATM;AURKA;AXIN1;BCAR1;BIRC5;BRAF;CAV1;CCND1;CD44;CDC20;CDH1;CDK4;CDKN1A;CTNNA1;CTNNB1;CTTN;DICER1;DSP;EGF;EGFR;EPHB2;ERBB2;FAT1;FN1;GPX1;GSTP1;HIF1A;HRAS;HSP90AA1;HSPA4;IGF2R;JAK2;KDM1A;KDM5B;KIF4A;LPCAT1;MAPK1;MAPK14;MAPK6;MCL1;MDM2;MLH1;MMRN1;MSH2;MTOR;MYC;MYO1B;NPM1;ODC1;PAK1;PARP1;PCBP2;PCNA;PIK3CA;PIK3CB;PLK1;PRDX1;PROM1;PTBP1;PTEN;PTPN11;PTPRZ1;RAC1;RAD17;RAD21;RELA;SIRT1;SKP2;S…
Hypoplasia of corpus callosum	0.00105744	23	AHDC1;ANKRD11;ARFGEF2;C2CD3;CTNNB1;DCHS1;DIAPH1;FGFR1;GBA2;HSD17B4;KIF5C;LONP1;POGZ;POLR3A;POLR3B;PPP2R1A;RAB3GAP2;RARS;SPG11;SPTAN1;TECPR2;ZFYVE26;ZNF592		Neoplasm Recurrence, Local	2.06435e-07	62	AKT1;AR;ASXL1;ATP5A1;AURKA;BIRC5;BIRC6;BRAF;BRCA1;BRCA2;CAV1;CCND1;CD44;CDC7;CDH1;CDK4;CDKN1A;DICER1;DROSHA;EGF;EGFR;ERBB2;ESR1;FANCD2;FEN1;GEMIN4;GNAS;GSTP1;H2AFX;HLA-A;HLA-C;HRAS;IGF2BP1;KMT2A;LTBP4;MDM2;MLH1;MSH2;MTR;NDUFA6;NOS2;NOTCH1;ODC1;PIK3CA;PLK1;PTEN;RAN;RGS12;RICTOR;RPA1;RPS6KB1;RRM1;RXRA;SETD1A;SMAD3;SMC1B;SP1;TP53;VDR;XPO5;XRCC5;YBX1
Acute lymphocytic leukemia	0.00110721	90	ABCA1;ABCC4;ABL1;ACTG1;AFF2;APAF1;ARID1A;ASPM;ASXL1;ATF7IP;ATM;ATR;BCR;BIRC6;BUB1;CASP8AP2;CCAR2;CREBBP;CTCF;CTNNB1;CYFIP1;DDR1;DHX32;DNMT1;EIF3A;EP300;ERBB2;EWSR1;FAT1;FGFR1;FLII;FN1;FUS;GLI3;HDAC2;HDAC3;HDAC5;HIF1A;HSPA4;IGF1R;IGF2BP1;INSR;JAK1;JMJD1C;KAT6A;KDM3B;KDM5A;KMT2A;KMT2C;KNL1;LONP1;LRP1;MSH2;MSH3;MTHFD1;MTOR;MTR;NCOR1;NOS2;NOTCH1;NSD2;NUP214;PDE3B;PIK3CA;PIK3CB;PTPN11;PTPRG;RALGAPB;RB…		Precursor T-Cell Lymphoblastic Leukemia-Lymphoma	2.19714e-07	79	ABCA2;ABCA3;ABL1;AFDN;AKT1;ATM;BCR;BRAF;BRCA1;BRCA2;CALM1;CALM2;CALM3;CCAR1;CCND1;CD44;CDK2;CDK4;CDKN1A;CHEK1;CKS1B;CKS2;CREBBP;DICER1;DLL1;EIF4A1;EIF4A2;EML1;FANCD2;FGFR1;FN1;GLI3;HDAC4;HIF1A;HLA-C;HMGA1;HRAS;IARS;IGF1R;JAG1;JAK1;JAK2;KMT2A;LCK;LEF1;MAPK8;MCL1;MSH2;MTOR;MYC;NF1;NOTCH1;NOTCH3;NR3C1;NUP155;NUP214;NUP98;PARP1;PCNA;PIK3CA;PIK3CB;PTEN;PTPN11;RASA1;RUNX2;SKP2;SMAD3;SMC4;SNAP91;SOS1;SR…
Carcinoma, Endometrioid	0.0011357	22	ACTN1;AFDN;APC;ARID1A;ATR;CIC;CTNNB1;DNMT1;ERBB2;HIF1A;MCM2;MSH2;MSH3;MSH6;NBR1;PIK3CA;PIK3CB;POLE;PPP2R1A;SMARCA1;SPEN;ZEB1		Cancer of Head and Neck	2.2015e-07	90	AKT1;ANXA2;APEX1;AR;ATM;AURKB;BIRC5;BRCA2;CCNB1;CCND1;CD44;CDK2;CDKN1A;CFTR;CHEK1;CTCF;DICER1;DNMT1;EGF;EGFR;EIF4E;ERBB2;FANCD2;FAT1;GLI2;GPX1;GSTP1;H2AFX;HIF1A;HLA-A;HLA-C;HRAS;HSP90AA1;HSPA4;HSPD1;IGF1R;IGF2R;ITGA6;JAG1;JUN;LRIG1;MAPK8;MCM7;MDM2;MKI67;MLH1;MSH2;MSH6;MTOR;MTR;NOS2;NOTCH1;NPEPPS;PARP4;PIK3CA;PIK3CB;PRKDC;PROM1;PTEN;PTPN11;PTPN13;RAC1;RAD17;RAD21;RAD51;RB1;RBX1;ROBO1;SF3B1;SHH;SKP…
Non-Small Cell Lung Carcinoma	0.00113742	189	ABCA1;ABCC4;ABL1;ACLY;ACTN4;APAF1;APC;ARHGEF2;ARID2;ASXL1;ATM;ATP7A;ATR;ATRX;BAG6;BCAR1;BIRC6;BRCA1;BRCA2;BRD7;BUB1;CCDC88A;CCT4;CDH2;COL4A3BP;CREBBP;CTNNB1;CTNND1;CTNND2;CUL7;DDB1;DDR1;DDX5;DICER1;DNMT1;DOCK3;DROSHA;DSP;EIF3A;EIF4A2;EML4;EP300;EPHB2;ERBB2;ESPL1;ESYT1;FBN2;FGFR1;FN1;FUS;FXR1;GLDC;GLI2;GLI3;GNAS;GRIP1;GSN;HDAC3;HDAC6;HEATR6;HIF1A;HIP1;HK1;HSPA4;IGF1R;IGF2R;INSR;JAG1;JAK1;KDM1A;KDM…		Liver neoplasms	2.26257e-07	213	ABCA1;ABCC4;ABL1;ACO1;ACSL3;AGO2;AKT1;ALAS1;ANXA2;AP3B1;APC;APEX1;AR;ARID1A;ASH1L;ATF4;ATM;AXIN1;BIRC5;BRAF;BRCA2;BRD1;BRD7;CAD;CALM1;CALM2;CALM3;CAV1;CCND1;CD44;CDC20;CDC6;CDH1;CDK2;CDK4;CDK9;CDKN1A;CLCN3;CPS1;CREB1;CRK;CTNNB1;CTNND1;CUL7;DCLK1;DDR1;DDX54;DLGAP5;DNMT1;EFNB2;EGF;EGFR;EIF2AK2;EPHA3;EPHB2;ERBB2;ESR1;FASN;FGFR1;FN1;GAS5;GJA1;GLI2;GNL3;GPC3;GSK3B;GSTP1;H2AFX;HCFC1;HDAC9;HIF1A;HK1;HLA…
Kyphosis deformity of spine	0.00113742	25	ALMS1;ATP7A;BAZ1B;CLIP2;CUL4B;FBN1;GNAS;GTF2I;HERC2;HSPG2;NOTCH3;NSD2;OCRL;PARP1;PIK3CA;POLD1;PTCH1;PTPN11;RAB3GAP2;ROR2;SEC24D;TSC2;UBA1;UTRN;WASHC5		Oropharyngeal disorders	2.42193e-07	22	AKT1;BCAR1;BRAF;CCND1;COX5B;CSE1L;CTNND1;DSP;EGFR;ERBB2;GNAS;HSPD1;JUN;LRP5;NAE1;PCNA;PIK3CA;PPARG;PTEN;SMG1;STAT1;TP53
Paraparesis, Spastic	0.00113742	14	ATF7IP;GBA2;HSPD1;KIF1A;KIF1C;MFN2;OPA1;POLG;SPAST;SPG11;TECPR2;TSHZ1;WNK1;ZFYVE26		Smooth philtrum	2.42193e-07	22	ADNP;ANKRD11;AP3B1;BCR;COL4A3BP;DPM1;FBN1;FLNA;IGF1R;KDM5C;MAPK1;MED12;MEIS2;NOTCH3;ORC4;PACS1;PIK3CA;PTPRF;RAD21;SEC23A;SIN3A;SMC1A
Absent auditory canals	0.00113742	9	DCHS1;EFTUD2;GLI3;GRIP1;NIPBL;ORC1;RAD21;SMC3;TSHZ1		Curvature of spine	2.71175e-07	73	AKT1;ALMS1;ARID1A;ATR;BRAF;BRCA2;CREBBP;CTBP1;CTNND2;CUL4B;DCHS1;EFNB1;EP300;FANCA;FANCC;FANCD2;FANCG;FANCI;FBN1;FGD1;FLII;FLNA;FLNB;FMR1;GARS;GPC3;HERC2;HNRNPK;HSD17B4;HSPG2;IARS2;IFT122;KAT6B;KIF5A;KMT2D;LONP1;MED12;MFN2;NF1;NOTCH2;NOTCH3;NSD2;OCRL;PCNT;PIK3CA;POLD1;PTCH1;PTEN;PTPN11;RAB3GAP2;RAD51;RAI1;ROR2;RUNX2;SBF1;SEC23A;SEC24D;SERPINH1;SF3B4;SIN3A;SLC12A6;SMAD3;SMARCA4;SNRPB;SOS1;SOS2;STA…
Absent external auditory canals	0.00113742	9	DCHS1;EFTUD2;GLI3;GRIP1;NIPBL;ORC1;RAD21;SMC3;TSHZ1		Metastatic malignant neoplasm to brain	2.82492e-07	40	ABCA1;ACTN4;AKT1;APC;BARD1;BRAF;BRCA1;CAV1;CD44;CDH1;CDH2;CLSPN;EGF;EGFR;EML4;EPHB2;ERBB2;ESR1;FGFR1;KIF5B;KIFC1;MALAT1;MAPK1;MTOR;NES;NOTCH1;PIK3CA;PIK3CB;PLK1;PLXND1;PTEN;RAD51;ROBO1;SMS;STAT3;TOPBP1;TP53;TPR;USP4;WDTC1
Atresia of the external auditory canal	0.00113742	9	DCHS1;EFTUD2;GLI3;GRIP1;NIPBL;ORC1;RAD21;SMC3;TSHZ1		Squamous cell carcinoma of the head and neck	2.82492e-07	149	ABL1;AKT1;ANXA2;APEX1;ARHGAP21;ARID2;ASAP1;ATF4;ATM;ATP5A1;ATP5G1;AURKA;AURKB;BIRC5;BRAF;BRCA1;BRCA2;BUB1;CAV1;CCDC88A;CCND1;CD44;CDC42;CDH1;CDH2;CDK2;CDK4;CDK5;CDK9;CDKN1A;CENPF;CIC;CSNK2A1;CTNNA2;CTNNAL1;CTTN;DICER1;DNMT1;DST;EGF;EGFR;EIF2AK2;EIF4E;EPHA3;EPHB2;ERBB2;ESR1;FANCC;FGFR1;FLNB;FN1;GPX1;GSTP1;H2AFX;HDAC1;HDAC9;HIF1A;HLA-A;HLA-C;HMGB2;HRAS;HSPA4;IGF1R;IGF2R;INTS2;JAG1;JAK1;JAK2;JUN;KIF…
Atretic auditory canal	0.00113742	9	DCHS1;EFTUD2;GLI3;GRIP1;NIPBL;ORC1;RAD21;SMC3;TSHZ1		Anemia, Diamond-Blackfan	2.84725e-07	24	CRK;CSDE1;LONP1;LPIN2;MAPK1;MAPK14;MAPK8;RPL11;RPL26;RPL27;RPL31;RPL35A;RPS14;RPS16;RPS17;RPS19;RPS21;RPS24;RPS27;RPS28;RPS29;RPS7;SMAD4;TP53
Hammer Toe	0.00113742	9	AARS;BCOR;FBN1;GARS;HSD17B4;KIF1B;MFN2;SACS;VCP		Large auricle	2.84725e-07	33	AKT1;ANKRD11;APC2;BAZ1B;BRAF;CASK;CBL;CLIP2;ELN;FLNA;FMR1;GLI2;GTF2I;INSR;JAG1;KDM5C;KIF1A;KMT2D;PACS1;PCLO;PHGDH;PIK3R1;POLR1A;PTCH1;PTEN;RAB3GAP2;RFC2;SALL1;SETD2;SIN3A;SLC12A6;ZBTB20;ZNF592
Overfolded helix	0.00113742	9	ARVCF;BCOR;CHD7;CPT2;EFTUD2;HSPG2;LONP1;SALL1;SEC24C		Large dysplastic ears	2.84725e-07	33	AKT1;ANKRD11;APC2;BAZ1B;BRAF;CASK;CBL;CLIP2;ELN;FLNA;FMR1;GLI2;GTF2I;INSR;JAG1;KDM5C;KIF1A;KMT2D;PACS1;PCLO;PHGDH;PIK3R1;POLR1A;PTCH1;PTEN;RAB3GAP2;RFC2;SALL1;SETD2;SIN3A;SLC12A6;ZBTB20;ZNF592
Steroid-resistant nephrotic syndrome	0.00113742	9	ACTN4;CRB2;FAT1;NUP107;NUP205;NUP93;SMARCAL1;TBC1D9;XPO5		Large pinnae	2.84725e-07	33	AKT1;ANKRD11;APC2;BAZ1B;BRAF;CASK;CBL;CLIP2;ELN;FLNA;FMR1;GLI2;GTF2I;INSR;JAG1;KDM5C;KIF1A;KMT2D;PACS1;PCLO;PHGDH;PIK3R1;POLR1A;PTCH1;PTEN;RAB3GAP2;RFC2;SALL1;SETD2;SIN3A;SLC12A6;ZBTB20;ZNF592
Prostate carcinoma	0.00122036	259	ABCA1;ABCA2;ABCC4;ABL1;ACACA;ACLY;ACSL3;AKAP12;AKAP13;ALAS1;APAF1;APC;ARHGAP21;ARHGEF12;ARHGEF2;ARVCF;ASAP1;ATAD2;ATM;BAZ2A;BCAR1;BIRC6;BLM;BMS1;BRCA1;BRCA2;BRD7;BRD8;BUB1;BUD13;CAD;CAND1;CCAR2;CDH2;CELSR3;CENPF;CHAF1A;CHD1;CHD8;CLCN3;CLTC;CPT2;CREBBP;CTCF;CTNNB1;CTNND1;CTNND2;DAXX;DCAF1;DDR1;DDX5;DLG5;DLGAP5;DNMT1;DPYSL3;DST;EHBP1;EIF3B;EML4;EP300;EPHA3;EPHA7;EPHB2;ERBB2;EXOC4;FASN;FASTKD2;FAT1;…		Large prominent ears	2.84725e-07	33	AKT1;ANKRD11;APC2;BAZ1B;BRAF;CASK;CBL;CLIP2;ELN;FLNA;FMR1;GLI2;GTF2I;INSR;JAG1;KDM5C;KIF1A;KMT2D;PACS1;PCLO;PHGDH;PIK3R1;POLR1A;PTCH1;PTEN;RAB3GAP2;RFC2;SALL1;SETD2;SIN3A;SLC12A6;ZBTB20;ZNF592
Macrostomia	0.00131942	18	ACTG1;ANKRD11;ARID1A;ATRX;BAZ1B;CLIP2;CUL4B;FRAS1;GTF2I;INSR;MED12;PIK3CA;ROR2;SEC23A;SMARCA4;TTC37;UBE3A;ZNF592		Large protruding ears	2.84725e-07	33	AKT1;ANKRD11;APC2;BAZ1B;BRAF;CASK;CBL;CLIP2;ELN;FLNA;FMR1;GLI2;GTF2I;INSR;JAG1;KDM5C;KIF1A;KMT2D;PACS1;PCLO;PHGDH;PIK3R1;POLR1A;PTCH1;PTEN;RAB3GAP2;RFC2;SALL1;SETD2;SIN3A;SLC12A6;ZBTB20;ZNF592
Broad nasal tip	0.00133872	10	AGL;BCOR;CASK;FLNB;IGF1R;KAT6A;KIF11;LRP2;PTPRF;RAB3GAP2		Large, floppy ears	2.84725e-07	33	AKT1;ANKRD11;APC2;BAZ1B;BRAF;CASK;CBL;CLIP2;ELN;FLNA;FMR1;GLI2;GTF2I;INSR;JAG1;KDM5C;KIF1A;KMT2D;PACS1;PCLO;PHGDH;PIK3R1;POLR1A;PTCH1;PTEN;RAB3GAP2;RFC2;SALL1;SETD2;SIN3A;SLC12A6;ZBTB20;ZNF592
Acinar Cell Carcinoma	0.00139059	11	APC;BRCA2;CASK;CENPF;CTNNB1;ERBB2;FAT1;MIB1;MKI67;MTOR;PIK3CA		Macrotia	2.84725e-07	33	AKT1;ANKRD11;APC2;BAZ1B;BRAF;CASK;CBL;CLIP2;ELN;FLNA;FMR1;GLI2;GTF2I;INSR;JAG1;KDM5C;KIF1A;KMT2D;PACS1;PCLO;PHGDH;PIK3R1;POLR1A;PTCH1;PTEN;RAB3GAP2;RFC2;SALL1;SETD2;SIN3A;SLC12A6;ZBTB20;ZNF592
Mitochondrial abnormalities	0.00139059	11	AGTPBP1;ATM;CREBBP;FUS;HADHA;HIF1A;NOTCH3;PEX5;PLEC;POLG;VCP		Carcinoma, Endometrioid	2.98487e-07	36	ACTN1;AFDN;APC;ARID1A;ATR;AURKA;BRAF;BTRC;CDH1;CIC;CTNNB1;DNMT1;EGFR;ERBB2;ESR1;EZR;GSTP1;HIF1A;LAMC1;MCM2;MLH1;MSH2;MSH3;MSH6;NBR1;NME1;PAK1;PIK3CA;PIK3CB;POLE;PPP2R1A;PTEN;SMARCA1;SPEN;TP53;ZEB1
DiGeorge Syndrome	0.0014231	14	ARVCF;BCR;CECR2;CHD7;CIC;CLTC;CTNNB1;DICER1;JMJD1C;KAT6A;PKP4;PLXND1;SEC24C;TJP1		Concave bridge of nose	3.02773e-07	55	AGL;AHDC1;AKT1;ARID1A;ATRX;BRAF;BUB1B;CBL;CHD7;CUL7;DPM1;ELN;ETFA;FBN1;FGFR1;FLII;FLNA;FLNB;GJA1;GLI2;GLI3;GNAS;GPC3;GRIP1;HDAC4;HRAS;HSD17B4;IARS2;INPPL1;INSR;JAG1;KIF11;LONP1;LRP2;MED12;MEGF8;NF1;NIPBL;PCLO;PEX1;PEX5;PIK3CA;PTEN;RAB3GAP2;RAD21;RAI1;ROR2;RUNX2;SMARCA4;SMARCAL1;SMC1A;SMC3;SOS1;TRIM37;WASHC5
Exophthalmos	0.00157263	21	CREBBP;EP300;FGFR1;FIG4;FLNA;FLNB;INSR;JAG1;KAT6B;LRP2;NBAS;NIPBL;NSD2;PHGDH;POLD1;PTPN11;ROR2;SEC24D;SOS1;SOS2;TTC37		Depressed nasal bridge	3.02773e-07	55	AGL;AHDC1;AKT1;ARID1A;ATRX;BRAF;BUB1B;CBL;CHD7;CUL7;DPM1;ELN;ETFA;FBN1;FGFR1;FLII;FLNA;FLNB;GJA1;GLI2;GLI3;GNAS;GPC3;GRIP1;HDAC4;HRAS;HSD17B4;IARS2;INPPL1;INSR;JAG1;KIF11;LONP1;LRP2;MED12;MEGF8;NF1;NIPBL;PCLO;PEX1;PEX5;PIK3CA;PTEN;RAB3GAP2;RAD21;RAI1;ROR2;RUNX2;SMARCA4;SMARCAL1;SMC1A;SMC3;SOS1;TRIM37;WASHC5
Enophthalmos	0.00157263	16	AGL;BCR;CREBBP;EP300;FBN1;FLII;JAG1;KDM5C;OCRL;PIK3R1;PLEC;PPP2R5D;RAI1;SIN3A;STAT3;UBE3A		Depressed nasal root/bridge	3.02773e-07	55	AGL;AHDC1;AKT1;ARID1A;ATRX;BRAF;BUB1B;CBL;CHD7;CUL7;DPM1;ELN;ETFA;FBN1;FGFR1;FLII;FLNA;FLNB;GJA1;GLI2;GLI3;GNAS;GPC3;GRIP1;HDAC4;HRAS;HSD17B4;IARS2;INPPL1;INSR;JAG1;KIF11;LONP1;LRP2;MED12;MEGF8;NF1;NIPBL;PCLO;PEX1;PEX5;PIK3CA;PTEN;RAB3GAP2;RAD21;RAI1;ROR2;RUNX2;SMARCA4;SMARCAL1;SMC1A;SMC3;SOS1;TRIM37;WASHC5
Sunken eyes	0.00157263	16	AGL;BCR;CREBBP;EP300;FBN1;FLII;JAG1;KDM5C;OCRL;PIK3R1;PLEC;PPP2R5D;RAI1;SIN3A;STAT3;UBE3A		Renal Cell Carcinoma	3.11243e-07	203	ABCA1;AGO2;AHNAK;AKAP13;AKT1;ANXA2;APAF1;APC;APEX1;AR;ARID1A;AURKA;AURKB;BAZ1A;BCAR1;BIRC5;BRAF;BRCA1;BUB1B;CAND1;CAPN1;CAV1;CCNB1;CCND1;CD44;CDC20;CDC42;CDH1;CDK2;CDK4;CDKN1A;CHAF1A;CHEK1;CKS1B;CLTC;CNN2;CRK;CSE1L;CTNNB1;CTNND1;CUL1;CUL7;DICER1;DLL1;DNMT1;DROSHA;EEF2;EGF;EGFR;EOMES;EP300;EPHA3;EPHB2;ERBB2;ESR1;ETFA;EZR;FAT1;FBN2;FLNB;FN1;GCN1;GEMIN4;GNAS;GNL3;GOLGA4;GPC3;GSK3B;GSTP1;H2AFX;HIF1A;…
Carcinoma of lung	0.00157263	207	ABCA1;ABCC4;ABL1;ACACA;ACLY;ACSL3;ACTN4;APAF1;APC;ARHGEF2;ASH1L;ASXL1;ATM;ATP2C1;ATR;BAG6;BCAR1;BCR;BMS1;BPTF;BRCA1;BRCA2;BUB1;CDH2;CLSPN;COL4A2;CRMP1;CTCF;CTNNB1;CTNND1;CTNND2;CUL3;DDR1;DICER1;DNMT1;DPYSL3;DROSHA;DSP;DST;EIF3A;EIF4A2;EML4;EPHA3;EPHA7;EPHB2;ERBB2;ESPL1;EXTL3;FASN;FAT1;FAT4;FBN2;FGFR1;FLNA;FLNB;FN1;FNDC3A;FUS;GLDC;GREB1;GSN;HADHA;HDAC2;HDAC3;HIF1A;HK1;HSPA4;HSPA8;HSPA9;HSPG2;HUWE1…		Cytomegalovirus Infections	3.15518e-07	58	ADAR;AGO2;ANAPC5;ATF4;ATM;CDH1;CDK9;CREB1;CRK;CTNNB1;EGF;EGFR;EIF2AK2;EIF4A2;EIF4E;EIF4G1;FN1;FUS;GJA1;GLI3;HLA-A;HLA-C;HRAS;HSP90AA1;HSPA4;HSPG2;JUN;LRP1;LRP2;MAPK1;MAPK14;MMRN1;MSH3;MTOR;NCAM1;NEFM;NSF;NUP214;ODC1;PCNA;PTEN;RELA;RPL26;SCAP;SIRT1;SP1;SPEN;SREBF1;SREBF2;SSB;STAT1;STAT3;THBS1;TP53;TSC2;UBL5;VIM;WNK1
Metastatic malignant neoplasm to brain	0.00160328	24	ABCA1;ACTN4;APC;BRCA1;CDH2;CLSPN;EML4;EPHB2;ERBB2;FGFR1;KIF5B;KIFC1;MTOR;NES;NOTCH1;PIK3CA;PIK3CB;PLXND1;ROBO1;STAT3;TOPBP1;TPR;USP4;WDTC1		Congenital Epicanthus	3.406e-07	52	AFF2;ARVCF;ATRX;BAZ1B;BRAF;BUB1;BUB1B;CASK;CBL;CCDC88A;CLIP2;COL4A3BP;CREBBP;CTBP1;CTNND2;DCHS1;EFTUD2;ELN;EP300;GJA1;GPC3;GTF2I;HRAS;HSD17B4;KAT6A;KIF11;KIF1A;KMT2A;LONP1;MED12;MEGF8;NBAS;NF1;NOTCH2;NSD2;PAFAH1B1;PEX1;PEX5;PIK3CA;PTCH1;PTPN11;RAB3GAP2;RB1;RFC2;ROR2;RPS28;SEC24C;SIN3A;SNRPB;SOS1;YWHAE;ZNF592
Cornelia De Lange Syndrome	0.00164376	9	ANKRD11;CTCF;KMT2A;NIPBL;PDS5A;PDS5B;RAD21;SMC3;TNKS		aggressive cancer	3.51675e-07	25	ACACA;ATAD2;BMS1;EGFR;EWSR1;EZR;FASN;HIF1A;IGF1R;IGF2BP1;MYC;MYO10;NME1;NOS2;NOTCH1;ODC1;PHGDH;PIK3CA;PIK3CB;PTEN;SETD2;SPHK1;TP53;XRCC5;ZEB1
Oligodontia	0.00164376	9	ANKRD11;BCOR;DSP;FGFR1;FLNA;GLI3;LRP6;POLR3A;POLR3B		invasive cancer	3.54016e-07	47	ABCA1;AKT1;APC;ASAP1;AURKA;BRCA1;BRCA2;CBX5;CCDC88A;CCND1;CD44;CDKN1A;CTNNB1;EGFR;ERBB2;ESR1;FGFR1;HIF1A;HNRNPC;IGF1R;INTS2;JAG1;KAT5;KDM5B;MCM2;MCM7;MDM2;MSH2;MSH6;MTOR;MYC;NME1;NOTCH1;PCNA;PIK3CA;PTTG1;PUM1;RAD9A;RAN;SMAD4;SMARCA2;SMARCA4;SRC;TP53;UBE3A;VIM;ZEB1
Spastic gait	0.00164376	9	CCT5;HSPD1;KIF1A;KIF5A;SPAST;TECPR2;VCP;WASHC5;ZFYVE26		Strabismus	3.56186e-07	74	ADNP;AP3B1;ARID1A;ATM;ATR;BAZ1B;BRAF;CASK;CHD7;CLIP2;CREBBP;CTBP1;CTCF;CTNNB1;DKC1;DPM1;ELN;EP300;FANCA;FANCC;FANCD2;FGD1;FGFR1;FLII;FLNA;GTF2I;HERC2;HRAS;HSD17B4;HSPD1;HSPG2;JAG1;KAT6A;KAT6B;KIF21A;KMT2A;KMT2D;LAMB2;LRPPRC;LYST;MED12;MPDU1;NDUFA1;NDUFB3;NDUFB9;NDUFS1;NDUFS4;NIPBL;NOTCH1;NSD2;OPA1;ORC1;OTX2;PEX1;PEX5;PLXND1;PPP2R5D;PTCH1;PTEN;PTPN11;RAI1;REV3L;RFC2;RPS19;SHH;SIN3A;SMAD4;SMARCA4;S…
Symmetrical dyschromatosis of extremities	0.0017744	6	ABL1;ADAR;CHAF1A;CTR9;PIK3R4;RAB3GAP2		Differentiated Thyroid Gland Carcinoma	3.74331e-07	38	APEX1;ATM;BRAF;BRCA1;CAV1;CD44;DICER1;EFNB2;EGFR;ERBB2;FN1;GRK2;H2AFX;HIF1A;HLA-C;IGF1R;MCM7;MDM2;NCAM1;NME1;PARP1;PIK3CA;PIK3CB;PJA2;PPARG;PROM1;PTCH1;PTEN;PTTG1;RELA;SF3B6;TCP1;TP53;TP53BP1;VDR;VHL;WDR3;WNK1
Congenital hypoplasia of penis	0.00180171	31	ATRX;C2CD3;CHD7;CUL4B;FGFR1;FIG4;GLI2;GLI3;GRIP1;HERC2;IFT140;IFT172;KAT6B;KDM5C;KMT2D;MAP3K1;NIPBL;ORC1;PNPLA6;POLR3B;PRPF6;PRPF8;PTPN11;RAB3GAP2;RAD21;ROR2;SIN3A;SMC3;SNRNP200;UBA1;ZBTB16		liposarcoma	3.74331e-07	38	AKT1;APC;ATRX;CALR;CAV1;CCND1;CDK4;CHEK1;DAXX;EGFR;EIF2S2;EIF4E;EWSR1;FASN;FUS;GNAS;HMGB2;HSP90AA1;JUN;MDM2;MIB1;MKI67;MLH1;MSH2;MYC;NF1;PIK3CA;PIK3CB;PLK1;PPARG;PTEN;RB1;SDC1;SREBF1;TAF15;TBC1D9;TOP2A;TP53
Defective tooth enamel	0.00180171	10	ATR;BAZ1B;CENPE;CLIP2;CUL7;GTF2I;LONP1;OBSL1;PCNT;SEC24D		leiomyosarcoma	3.9049e-07	34	AKT1;APEX1;ATRX;BRCA1;CCND1;CDH1;CDH2;CDK4;ELN;ESR1;FUS;HMGA1;HSP90AA1;IRS2;JAK1;MDM2;MED12;MYC;NME1;OBSCN;PIK3CA;PIK3CB;PTEN;RB1;RICTOR;ROR2;SRC;STAT3;TBC1D9;TP53;TYRO3;VCAN;VIM;ZEB1
Dystrophic tooth enamel	0.00180171	10	ATR;BAZ1B;CENPE;CLIP2;CUL7;GTF2I;LONP1;OBSL1;PCNT;SEC24D		Anaplastic astrocytoma	4.02569e-07	42	AKT1;ANXA2;ASXL1;ATRX;BRAF;CAV1;CCND1;CDK2;CDK4;EGF;EGFR;ESR1;FN1;GRB2;GSTP1;H3F3A;HIF1A;HLA-C;KIF14;KIF15;KIFC1;MAPK1;MDM2;MIB1;MKI67;MSH4;NOTCH2;PAFAH1B1;PIK3CA;PIK3CB;PRDX1;PTEN;PTK2;PXN;RB1;SETD2;SETX;SF3B1;STAT3;TP53;VIM;YWHAE
Carcinogenesis	0.00180171	341	ABCA1;ABL1;ACLY;ACTN4;ADAR;ADCY3;AFDN;AKAP11;AKAP12;AKAP13;AMER1;APAF1;APC;ARHGAP21;ARHGEF2;ARID1A;ASAP1;ASCC3;ASH1L;ATAD2;ATM;ATP5B;ATR;BCAR1;BCR;BLM;BPTF;BRCA1;BRCA2;BRD7;BUB1;CAND1;CASK;CASP8AP2;CCAR2;CCDC88A;CCT6A;CDC5L;CDK12;CEBPZ;CENPE;CHD1;CHD3;CHD4;CIC;CLIP2;CLSPN;CLTC;CREBBP;CRMP1;CROCC;CSE1L;CTCF;CTNNA1;CTNNB1;CTNND1;CTNND2;CTR9;CUL4B;CUL5;DAXX;DCAF1;DDR1;DDX1;DDX46;DDX5;DHX16;DICER1;DL…		Endometriosis	4.1722e-07	124	ABCA1;ABCC4;ACACA;ACTN1;ACTN4;AKAP13;AKT1;ANXA2;APEX1;AR;ARID1A;ATM;BCR;BIRC5;BMS1;BRAF;BRCA1;BRCA2;BRD8;CARM1;CCNB1;CCND1;CD44;CDC42;CDC6;CDH1;CKS1B;CLCN3;CNR1;CREB1;CRK;CTNNB1;DDX5;DICER1;DNMT1;EGF;EGFR;EPHB2;ERBB2;ESR1;EZR;FBN1;FN1;GJA1;GREB1;GSTP1;HDAC1;HDAC2;HIF1A;HK1;HLA-A;HLA-C;HMGA1;HSPA4;HSPD1;IGF1R;INSR;IRS2;ITGB8;JAK1;JUN;KIFAP3;MAP2;MAPK1;MAPK14;MAPK8;MED1;MED14;MEGF10;MLH1;MSH6;MTA2;…
Radially deviated fingers	0.00180171	11	ANKRD11;ATRX;BCOR;FGD1;IGF1R;MED12;PHGDH;PIK3R1;PTPN11;ROR2;SIN3A		Malignant tumor of cervix	4.31029e-07	137	AGO2;AKT1;ANXA2;APEX1;AR;ARID1A;ATM;ATR;AURKA;BARD1;BDP1;BIRC5;BRAF;BRCA1;CALM1;CALM2;CALM3;CALR;CAV1;CCNB1;CCND1;CD44;CDC20;CDC42;CDH1;CDK2;CDK4;CDKN1A;CFTR;CHEK1;CLSPN;CTNNB1;CUL5;DICER1;DNMT1;EGF;EGFR;EIF3F;EIF4E;EIF4G2;EPHB2;ERBB2;ESR1;EZR;FANCA;FANCC;FLNB;FN1;GEMIN4;GLI3;GSN;HDAC6;HIF1A;HLA-A;HLA-C;HLTF;HMGA1;HSP90AA1;HSPA4;IGF1R;ILF2;JAK2;JUN;MALAT1;MAPK8;MAPK8IP2;MCL1;MCM2;MCM4;MCM7;MDC1;M…
Therapy-Related Acute Myeloid Leukemia	0.00197744	13	ASXL1;BCR;BRCA1;BRCA2;CREBBP;FN1;KAT6A;KMT2A;MSH2;NUP98;PTPN11;SF3B1;TOP2A		Syndactyly of the toes	4.34208e-07	21	EFNB1;FGFR1;FIG4;FLII;FLNA;GJA1;GLI3;GPC3;GRIP1;HDAC4;MEGF8;NIPBL;PHGDH;PIK3CA;RAD21;RAI1;SF3B4;SHH;SIN3A;SMC1A;SMC3
Thin lips	0.00197744	13	CTCF;FIG4;IGF1R;JAG1;MED12;NBAS;NIPBL;NOTCH2;RAD21;SEC23A;SIN3A;SMC3;ZBTB16		Werner Syndrome	4.92948e-07	31	ABL1;ATR;BLM;BRCA1;CDC42;CDKN1A;CREBBP;CRK;DHX9;DKC1;FANCD2;FEN1;FN1;H2AFX;INSR;MAPK1;MAPK14;MMRN1;MTOR;MYC;PARP1;PCNA;POLB;POLD1;PRPF19;RAD51;RPA1;RPS3;TAGLN;TP53;WDTC1
Big calvaria	0.00207509	28	APC2;CUL4B;GLI3;HDAC6;HSD17B4;HUWE1;INPPL1;KDM5C;LRP2;LRP4;LRP5;MED12;MPDZ;NF1;NOTCH2;PEX1;PEX5;PIK3CA;PPP2R5D;PTCH1;ROR2;SEC23A;SEC23B;SEC24D;SETD2;SOS1;TRIM37;WASHC5		Atrial Premature Complexes	5.13265e-07	32	APC;APC2;BLM;BRAF;BRCA1;BRCA2;CAV1;CD44;CDH1;CHEK1;CTBP1;CTNNB1;GLI3;GSTP1;H2AFX;HDAC2;KIF3A;LEF1;MAPRE1;MLH1;MSH3;MYC;NES;ODC1;PAFAH1B1;PALB2;POLB;PTCH1;RAC1;RB1CC1;SPEN;TP53
Increased head circumference	0.00207509	28	APC2;CUL4B;GLI3;HDAC6;HSD17B4;HUWE1;INPPL1;KDM5C;LRP2;LRP4;LRP5;MED12;MPDZ;NF1;NOTCH2;PEX1;PEX5;PIK3CA;PPP2R5D;PTCH1;ROR2;SEC23A;SEC23B;SEC24D;SETD2;SOS1;TRIM37;WASHC5		Leukemia, T-Cell	5.28976e-07	70	AKT1;ATF7IP;ATM;ATR;BCR;BIRC5;CCNB1;CCND1;CD44;CDC20;CDKN1A;CREB1;DLL1;EIF4E;EIF4G1;HLA-A;HNRNPA1;HSP90AA1;IARS;IFT172;JAK1;JAK2;JARID2;JUN;KAT2B;KMT2A;KMT2C;LCK;LONP1;LRP1;MCL1;MDM2;MLH1;MSH2;MSH3;MSH6;MYC;NCAM1;NOS2;NOTCH1;NOTCH3;PCNA;PHF20;PIK3CA;PIK3CB;PNP;PRDM16;PTEN;PTPN13;RAC1;RELA;RPSA;SERPINH1;SIRT1;SPTAN1;STAT1;STAT3;STAT5B;TARS;TBC1D9;TERF1;TERF2;THBS1;TP53;TXN;UBL5;WNK1;YY1;ZEB1;ZNF282
Increased size of cranium	0.00207509	28	APC2;CUL4B;GLI3;HDAC6;HSD17B4;HUWE1;INPPL1;KDM5C;LRP2;LRP4;LRP5;MED12;MPDZ;NF1;NOTCH2;PEX1;PEX5;PIK3CA;PPP2R5D;PTCH1;ROR2;SEC23A;SEC23B;SEC24D;SETD2;SOS1;TRIM37;WASHC5		Hematopoietic Neoplasms	5.51798e-07	47	ABL1;AKT1;BCR;CCND1;CDK4;CHD8;CREBBP;CTNNA1;DICER1;EIF4E;EP300;EPHA3;EPHB2;ESR1;FN1;HIP1;HLA-C;HMGA1;HTT;IGF1R;JAK2;KDM1A;KDM2B;KMT2A;LEF1;LONP1;MAPK1;MYC;NCAM1;NUP98;PBX1;PCNA;PIK3CA;PIK3CB;PLK1;PPARG;PTPN11;PTTG1;SF3B1;SMCHD1;SRSF3;STAT3;STAT5B;TBC1D9;TET1;TP53;U2AF1
Increased size of skull	0.00207509	28	APC2;CUL4B;GLI3;HDAC6;HSD17B4;HUWE1;INPPL1;KDM5C;LRP2;LRP4;LRP5;MED12;MPDZ;NF1;NOTCH2;PEX1;PEX5;PIK3CA;PPP2R5D;PTCH1;ROR2;SEC23A;SEC23B;SEC24D;SETD2;SOS1;TRIM37;WASHC5		cervical cancer	6.06819e-07	144	ABCC4;AGO2;AKT1;ANXA2;APEX1;AR;ARID1A;ATM;ATR;AURKA;BARD1;BDP1;BIRC5;BRAF;BRCA1;CALM1;CALM2;CALM3;CALR;CAV1;CCNB1;CCND1;CD44;CDC20;CDC42;CDH1;CDK2;CDK4;CDKN1A;CFTR;CHEK1;CLSPN;CTNNB1;CUL5;DICER1;DNMT1;EGF;EGFR;EIF3F;EIF4E;EIF4G2;EPHB2;ERBB2;ESR1;EZR;FANCA;FANCC;FLNB;FN1;GEMIN4;GLI3;GSN;GSTP1;HDAC6;HECW2;HIF1A;HLA-A;HLA-C;HLTF;HMGA1;HRAS;HSP90AA1;HSPA4;IGF1R;ILF2;JAK2;JUN;MALAT1;MAPK8;MAPK8IP2;MCL…
Short 4th metacarpal	0.00208085	5	DCHS1;FLNA;GLI3;GNAS;PTCH1		Thyroid Neoplasm	6.10132e-07	96	AKAP9;AKT1;APAF1;APC;APEX1;AR;ATM;AURKA;BIRC5;BRAF;BUB1;CAD;CCND1;CD44;CDH1;CDK5;CDKN1A;CTNNB1;EGF;EGFR;EIF4E;ERBB2;ERC1;ESR1;FN1;GNAS;GOLGA5;GPC3;GSTP1;HIF1A;HLA-C;HLTF;HMGA1;HRAS;HSPG2;IGF1R;IGF2R;JUN;JUP;LRP1;MADD;MAPK14;MCM5;MCM7;MDM2;MKI67;MLH1;MMRN1;MSH2;MSH3;MYC;NES;NGF;NME1;NOTCH1;PAK1;PARP1;PCM1;PCNA;PIK3CA;PIK3CB;PJA2;PLK1;PPARG;PRKDC;PTCH1;PTEN;PTK2;PTTG1;RAD51;RAD9A;RASA1;RBBP4;RUNX2;…
Myelodysplasia	0.0020837	18	APAF1;ASXL1;ATRX;BCOR;BCORL1;BCR;DICER1;DNMT1;DROSHA;IRS2;KMT2A;MCM3AP;MSH2;NUP214;SF3B1;SIN3A;SRP72;TBC1D9		Tumor Angiogenesis	7.09137e-07	89	ABCA1;ADAMTS9;AKT1;ANXA2;APEX1;AR;ATM;BCAR1;BRAF;CAD;CAV1;CCDC88A;CD44;CDKN1A;CREBBP;CSE1L;CTNND1;CTTN;DNMT1;EGF;EGFR;EIF4E;EIF4G1;EPHA3;EPHB2;ERBB2;EZR;FGFR1;FN1;GIT1;GJA1;H2AFX;HDAC1;HIF1A;HSP90AA1;IARS;IRS1;ITGA6;JAK2;JUN;KDM5A;KIF11;MALAT1;MAPK1;MAPK8;MCL1;MDM2;MSH3;MTOR;MYC;NCL;NES;NGF;NOS2;NOTCH1;NPM1;PAK1;PARP1;PIK3CA;PIK3CB;PLXNA4;PLXND1;PPARG;PRDX1;PRKD1;PROM1;PTEN;PTTG1;PXN;RAC1;ROBO1;R…
Adenocarcinoma, Endometrioid	0.0020837	14	AFDN;ARID1A;CIC;CTNNB1;ERBB2;MKI67;MSH3;MSH6;NBR1;PIK3CA;PKN1;POLE;SPEN;ZEB1		Breast Cancer, Familial	7.14542e-07	41	AKAP13;ATM;BARD1;BCORL1;BIRC5;BLM;BRCA1;BRCA2;BUB1B;CAV1;CCND1;CD44;CENPE;CHEK1;CLSPN;EGFR;EP300;ERBB2;ESR1;FANCD2;GSTP1;HIF1A;HMGA1;HRAS;JAK2;MAGED2;MDM2;MLH1;MSH2;MSH3;MSH6;MYC;PALB2;PARP1;PER1;PHB;PTEN;PTPRG;RAD51;SLC9A3R1;TP53
Distal amyotrophy	0.0020837	14	ABCA1;AGL;ATP7A;CCT5;DCTN1;GARS;KIF1B;KIF1C;MFN2;PNPLA6;POLG;SACS;VCP;ZFYVE26		Invasive carcinoma of breast	7.80571e-07	80	AKT1;ANXA2;AR;ARID1A;ASAP1;ATM;BRCA1;BRCA2;CBX5;CCND1;CD44;CDH1;CDKN1A;CHAF1A;CTCF;DNMT1;EGF;EGFR;ERBB2;ESR1;EZR;FANCD2;FASN;FAT1;FGFR1;FLNA;FN1;GMNN;GNAS;GNL3;GRB2;GREB1;GSN;GSTP1;HDAC1;HDAC6;HIF1A;HLA-C;HSPA8;IGF1R;IGF2R;INTS2;JUN;KAT2B;KIAA0100;LDHB;MAPK14;MDM2;MLH1;MSH3;MTOR;MYC;NCOR1;NME1;PALB2;PARD3;PARP1;PBRM1;PIK3CA;PIK3CB;PKD1;PLK1;PRKD1;PTEN;PTK2;PXN;RAC1;RUNX2;SETD2;SMC1A;STAT3;TBC1D9;…
Low posterior hairline	0.0020837	14	ANKRD11;CREBBP;EP300;KAT6B;NF1;NIPBL;NSD2;PTPN11;RAB3GAP2;RAD21;SMC3;SOS1;SOS2;WASHC5		Malignant neoplasm of thyroid	9.29437e-07	95	ACLY;AKAP9;AKT1;APC;ATF4;ATM;AURKA;BRAF;BRCA2;BUB1;BUB1B;CAV1;CCND1;CD44;CDK2;CDK5;CDKN1A;CPSF2;CREB1;CREBBP;CSNK2A1;CTNNB1;DIAPH1;DNER;EFNB2;EGF;EGFR;EIF4E;EPHB2;ERBB2;FGFR1;FN1;GRK2;GSK3B;GSTP1;HIF1A;HLA-C;HLTF;HMGA1;HRAS;HSP90AA1;IGF1R;IQGAP1;JUN;KAT5;MADD;MAPK1;MCM5;MCM7;MDM2;MMRN1;MTOR;MYC;NCAM1;NOTCH1;NPC2;PAK1;PARP1;PATZ1;PCNA;PHB;PIK3CA;PIK3CB;PJA2;PPARG;PROM1;PTCH1;PTEN;PTTG1;RAD51;RARA;…
Anxiety disease	0.00209991	22	BAZ1B;CHD7;CLIP2;DCTN1;FGFR1;FIG4;FLII;FUS;GNAS;GTF2I;IGF1R;MSH2;MSH6;NIPBL;OCRL;PIK3CA;RAD21;RAI1;SMC3;UNC13A;VCP;VPS13A		Secondary malignant neoplasm of liver	9.81925e-07	86	AKT1;ANKRD12;ANXA2;APAF1;APC;AR;ARHGEF2;ATRX;AURKA;AURKB;BRAF;BRCA2;CCND1;CD44;CFTR;CHAF1A;CTNNB1;DCLK1;DDR1;DICER1;DPYSL3;EGF;EGFR;EP300;EPHB2;ERBB2;ESR1;EZR;FASN;FGFR1;FLNA;FN1;FUS;GPC3;GSN;HIF1A;HNRNPM;HSP90AA1;HSPA9;IGF1R;IQGAP1;IQSEC1;IRS1;KAT2B;LCK;LEF1;MAPK1;MDM2;MMRN1;MSH2;MYC;NCAM1;NES;NME1;NOS2;NOTCH1;PARG;PCNA;PIK3CA;PIK3CB;PPARG;PROM1;PTEN;PTTG1;RASA1;ROBO1;RPLP0;RPS6;RPSA;RRM1;RUNX2;…
Aggressive behavior	0.00213116	17	AFF2;ANK3;ATP13A2;BCOR;CHD2;CUL4B;FIG4;GLDC;HERC2;KDM5C;KMT2A;MED12;OCRL;SIN3A;SPAST;VCP;VPS13A		Alzheimer's Disease	1.02621e-06	319	ABCA1;ABCA2;ABCC4;ABL1;ACO1;ADNP;AGRN;AKAP9;AKT1;ALS2;AMPH;ANK3;APBB1;APC;APC2;APEX1;AR;ATF4;ATF7IP;ATM;ATP5A1;ATP5G1;ATP5H;ATP7A;BCR;BIRC5;BLM;BMS1;BPTF;BRCA1;BRCA2;BRD8;C12orf57;CALM1;CALM2;CALM3;CALR;CAPN1;CAV1;CCNB1;CCND1;CCNI;CD44;CDC42;CDH1;CDH2;CDK4;CDK5;CDK9;CDKN1A;CFTR;CHEK1;CLCN3;CNR1;COL4A3BP;CREB1;CREBBP;CRK;CRMP1;CSNK2A1;CTNNB1;CTNND2;CTTN;DAXX;DDR1;DDX46;DHX16;DLL1;DNMBP;DNMT1;DPYSL…
Hypoplastic feet	0.00216377	16	CENPE;COL4A3BP;CUL4B;FBN1;FGD1;FGFR1;HDAC6;HERC2;IFT140;IFT172;INPPL1;KDM5C;NIPBL;RAD21;ROR2;SMC3		Myeloproliferative disease	1.02621e-06	59	ABCA1;ABL1;AKT1;AR;ASXL1;ATG2B;BCR;CALR;CBL;CCDC88C;CD44;CEP85L;CREB1;CREBBP;CTNNB1;EP300;FGFR1;FN1;FUS;GOLGB1;HBS1L;HSPA9;IGF1R;IRS2;JAK1;JAK2;KIDINS220;KIF5B;KMT2A;MDM2;MN1;NCAM1;NF1;NIN;NPM1;NUP98;ODC1;PAFAH1B1;PIK3CA;PIK3CB;PRDX1;PTPN11;RABEP1;RARA;RARS;RASA1;SF3B1;SPTBN1;SRSF2;STAT3;STAT5B;TBC1D9;TET1;TET3;TP53;U2AF1;WDTC1;YWHAE;ZMYM2
High pitched voice	0.00224663	9	BLM;CTNND2;HSPG2;MED12;PCNT;POLD1;SEC24D;SMARCAL1;TRIM37		Dwarfism	1.02749e-06	53	ARID1B;ASXL1;BRCA2;CCND1;CDK5RAP2;CMAS;CUL7;EPHB2;F8;FBN1;FGFR1;FLNB;GLI2;GMNN;GNAS;HIP1;HLA-C;HRAS;IGF1R;INPPL1;KDM5C;KMT2B;KMT2D;LEMD3;MAP4;MAPK1;MCM2;MCM4;MTR;NAT10;NBAS;NBEA;NF1;NIN;ODC1;ORC1;ORC3;ORC4;OTX2;PCNT;PNPLA6;POLD1;PTPN11;RAC1;RAI1;RB1CC1;ROR2;SIN3A;SOD1;STAT1;STAT5B;TP53;VDR
Congenital hypoplasia of kidney	0.00235687	10	ARVCF;ATRX;BCOR;DCHS1;GLI3;GRIP1;JAG1;KIF14;LRP4;SEC24C		Spots on skin	1.04125e-06	64	AKT1;APC;AR;ATM;BCR;BRAF;BRCA1;BRCA2;CD44;CDK2;CFTR;CRK;CTCF;EEF2;EGFR;ERBB2;FANCD2;FBN1;FBXO11;FMR1;FN1;GNAS;GSN;HADHA;HRAS;HSPA8;IGF1R;INTS2;KMT2A;KRT8;LRP1;LRP2;MAPK1;MLH1;MSH2;MSH6;MYO9B;NCL;NES;NF1;NOTCH1;NPM1;PBX1;PIK3CA;PIK3CB;PKD1;PNP;PRDX1;PROM1;PTCH1;PTEN;PTPN11;RB1;RUNX2;SOD1;SPTAN1;SRC;SRSF2;TOP2A;TP53;TSC2;TXN;VIM;ZFHX3
Hereditary Motor and Sensory-Neuropathy Type II	0.00235687	10	AARS;DHTKD1;GARS;KIF1A;KIF1B;KIF5A;MFN2;MORC2;VCP;WNK1		Hemangiosarcoma	1.06631e-06	27	AKT1;ANXA2;ATRX;BRAF;BRCA2;CCND1;CIC;CTNNB1;ERBB2;HIF1A;HRAS;JUN;MAPK1;MDM2;MTOR;MYC;NOTCH1;NUP160;PIK3CA;PIK3CB;PLCG1;PTEN;RPS6;SMAD2;THBS1;TP53;VHL
Inadequate arch length for tooth size	0.00235687	13	ATR;BCOR;CREBBP;EP300;FBN1;FGFR1;GRIP1;MED12;NOTCH3;POLD1;ROR2;TECPR2;TRIM37		Malignant neoplasm of brain	1.08283e-06	42	ABCA1;ABCA2;AKT1;ATM;BRAF;CDK4;CHEK1;DDR1;EGF;EGFR;ERBB2;EXTL3;FGFR1;GNL3;GSTP1;HK1;INSR;KDM1A;MDM2;MTR;MYC;NF2;NPM1;OTX2;PIK3CA;PIK3CB;PLK1;PPARG;PPP2R2C;PRKDC;PROM1;PTEN;RAD51;SFMBT1;SHH;STAT3;TIMELESS;TP53;VHL;XRCC5;XRCC6;ZEB1
Tooth Crowding	0.00235687	13	ATR;BCOR;CREBBP;EP300;FBN1;FGFR1;GRIP1;MED12;NOTCH3;POLD1;ROR2;TECPR2;TRIM37		Blepharoptosis	1.10532e-06	61	ACSL3;ACTG1;ADNP;AKT1;ARVCF;ATRX;BCOR;BRAF;CBL;CHD7;CREBBP;CTBP1;DCHS1;DNA2;EP300;FASTKD2;FGD1;FGFR1;FLNA;HNRNPK;HRAS;HSPG2;KAT6A;KAT6B;KIF21A;KMT2D;LONP1;LRP4;MED12;NDUFA1;NDUFB3;NDUFB9;NDUFS1;NDUFS4;NF1;NIPBL;NOTCH3;NSD2;OPA1;PABPN1;PEX1;PEX5;PLXND1;POLG;PTPN11;RAD21;RB1;REV3L;SEC24C;SF3B4;SLC12A6;SMC1A;SMC3;SOS1;SOS2;SZT2;UBA1;ZBTB20;ZFHX4;ZNF423;ZNF592
Tooth mass arch size discrepancy	0.00235687	13	ATR;BCOR;CREBBP;EP300;FBN1;FGFR1;GRIP1;MED12;NOTCH3;POLD1;ROR2;TECPR2;TRIM37		Inflammatory Breast Carcinoma	1.1574e-06	28	AKT1;APC;ATAD2;BRCA1;BRCA2;CAV1;CD44;CTNND1;CTSC;EGF;EGFR;EIF4G1;ERBB2;ESR1;FGFR1;HDAC6;KIAA0100;MYC;NOTCH3;PIK3CA;PIK3CB;PTEN;PTK2;PUM1;SHH;SMARCA4;TP53;VDR
Tooth size discrepancy	0.00235687	13	ATR;BCOR;CREBBP;EP300;FBN1;FGFR1;GRIP1;MED12;NOTCH3;POLD1;ROR2;TECPR2;TRIM37		Ventricular Septal Defects	1.18548e-06	46	ARVCF;BCOR;BRAF;CHD7;CREBBP;CTBP1;EP300;FBN1;FBN2;FIG4;FLNB;FN1;GJA1;GLI3;GPC3;HRAS;IGF1R;JAG1;KAT6A;KAT6B;KMT2D;LONP1;LRP5;MED12;NIPBL;NSD2;PEX1;PHGDH;PIK3CA;PRPF31;PTPN11;ROR2;RPL35A;RPS19;RTN4;SALL1;SALL4;SEC24C;SMAD2;SMAD3;SNRPB;SOS1;TSHZ1;TXNL4A;WASHC5;YES1
Schizophrenia	0.00243419	181	ABCA1;ACACA;ACLY;ACTG1;ADNP;ADNP2;AKAP9;ANK3;AP3B1;AP3D1;APC;ARHGAP32;ARHGEF2;ARVCF;ASPM;ATM;ATP2B4;ATP5A1;BCL9;BMS1;BRCA1;BRCA2;BRD1;BSN;CABIN1;CAD;CASK;CCT3;CCT6A;CELSR1;CHD4;CPS1;CREBBP;CRMP1;CTCF;CTNNA2;CTNNB1;CTNND2;CYFIP1;DAXX;DDR1;DICER1;DNMT1;DROSHA;EHMT1;EIF2AK4;EIF4A2;EPHB2;FASN;FBN1;FGFR1;FLNB;FN1;FYN;GEMIN4;GNAS;GRIP1;GSN;HDAC2;HDAC3;HERC2;HIF1A;HK1;HNRNPU;HSPA4;HSPA8;HSPA9;HSPD1;HSPG…		Syndactyly of fingers	1.2062e-06	21	AKT1;BCOR;BTRC;EFNB1;FGD1;FGFR1;FLNB;GJA1;GLI3;GPC3;GRIP1;HDAC4;MEGF8;NOTCH1;PHGDH;PIK3CA;PNPLA6;PTEN;RB1;SEM1;SHH
Developmental Disabilities	0.00251421	27	ASXL1;ATP2C1;ATRX;CHD7;CREBBP;CYFIP1;EHMT1;EPHB2;FGD1;GLI3;GNAS;JAG1;KAT6B;LRP2;NF1;NIPBL;NOTCH1;NOTCH3;PTCH1;PTPN11;RAI1;SETD1A;SMC3;TAF1;USP9X;VCP;VPS13B		Glioblastoma Multiforme	1.2062e-06	134	ABCC4;ABL1;AGO2;AKT1;ANXA2;AR;ATM;BIRC5;BRAF;BUB1B;CALM1;CALM2;CALM3;CCNB1;CCND1;CD44;CDC20;CDK2;CDK4;CDK7;CDKN1A;CIC;CMAS;CREBBP;CRMP1;CTNNB1;DNER;DNMT1;DOCK7;EGF;EGFR;EPHA3;EPHB2;ERBB2;FAT1;FGFR1;FN1;FTL;GAS1;GJA1;H2AFX;H3F3A;HCFC1;HDAC1;HDAC6;HIF1A;HK1;HLA-A;HLA-C;HMGA1;HSP90AA1;IGF1R;IGF2BP1;JAK2;JUN;KIF3A;KMT2A;LEF1;MAPK1;MAPK14;MAPK8;MCL1;MDM2;MIB1;MKI67;MLH1;MSH2;MSH3;MSH6;MTOR;MTR;MYC;NES…
Breast cancer, lobular	0.0027586	8	APC;BRCA1;BRCA2;CTNND1;CTNND2;ERBB2;PIK3CA;TBC1D9		Uranostaphyloschisis	1.23065e-06	56	ARVCF;ATR;BUB1B;C2CD3;CENPF;CHD7;CTBP1;EFNB1;EFTUD2;FAF1;FGD1;FGFR1;FLNA;FLNB;GAS1;GJA1;GLI2;GPC3;GRIP1;HSPG2;KMT2D;MED12;MEIS2;MN1;NIPBL;NSD2;ORC1;OTX2;PDS5B;PEX5;PHGDH;POLR1A;PTCH1;PTPN11;RB1;RBM10;RPL11;RPL26;RPL35A;RPS17;RPS19;RPS24;RPS28;RPS29;RPS7;RUNX2;SEC24C;SF3B4;SHH;SMS;SNRPB;STAT3;TP53;TXNL4A;UBB;WASHC5
Glioblastoma	0.0028445	179	ABCC4;ABL1;APAF1;APC;ARHGAP21;ARHGEF2;ASAP1;ASPM;ATM;ATP5A1;ATP5B;ATR;ATRX;BCAR1;BCR;BRCA1;BRCA2;BUB1;CDH2;CEP350;CHAF1A;CHD4;CIC;CLTC;CMAS;CNOT1;CSE1L;CTCF;CTNNA1;CTNNB1;CTNND2;CUL3;DAXX;DCHS1;DDR1;DMXL1;DNMT1;DOCK1;DOCK7;EEF2;EIF3A;EP300;EPHA3;EPHA7;EPHB2;ERBB2;ESPL1;EXTL3;FAT1;FGFR1;FLNB;FN1;FOCAD;FYN;GLI2;GLI3;GOLGA4;GSN;HDAC6;HEATR1;HIF1A;HK1;HSPA4;HSPA8;IARS;IGF1R;INPPL1;INSR;IRS2;JAG1;KDM5…		Adult Acute Lymphocytic Leukemia	1.26593e-06	30	ABL1;APC;ATM;BCR;CCND1;CDK4;EIF3E;ERBB2;GPC3;JAK1;KDM5A;KMT2A;LEF1;MDM2;MLH1;MTR;MYC;MYCBP2;NCAM1;NEO1;NF1;PBX1;POLG;PTBP1;PTEN;RFC1;RUNX2;SRRM2;TP53;XRCC5
Congenital clubfoot	0.00285205	25	APAF1;ATRX;DCHS1;DST;FLNA;FLNB;FRAS1;GLI3;GRIP1;HSD17B4;HSPG2;KAT6B;KDM5C;MEGF8;NCOR2;NSD2;ORC1;PEX1;PEX5;PI4KA;PLXND1;RAB3GAP2;RBM10;REV3L;ZNF592		Adenocarcinoma, Endometrioid	1.26593e-06	23	AFDN;ARID1A;BRAF;CD44;CIC;CTNNB1;EGFR;ERBB2;ESR1;IRS1;MKI67;MLH1;MSH3;MSH6;NBR1;PIK3CA;PKN1;POLE;PROM1;PTEN;SPEN;TP53;ZEB1
Chronic otitis media	0.0029404	13	ALMS1;ARVCF;BAZ1B;CHD7;CLIP2;FLII;GTF2I;MYH9;PIK3R1;RAI1;ROR2;SEC24C;STAT3		Multiple polyps	1.26593e-06	23	APC;ATM;BRAF;CALR;CHEK1;EGF;EPHB2;FOCAD;HLTF;HRAS;MLH1;MSH2;MSH3;MSH6;MTOR;ODC1;PAK1;POLD1;POLE;PTEN;SMAD3;SMAD4;TP53
Physical aggression	0.0029404	17	AFF2;ANK3;ATP13A2;BCOR;CHD2;CUL4B;FIG4;GLDC;HERC2;KDM5C;KMT2A;MED12;OCRL;SIN3A;SPAST;VCP;VPS13A		Squamous cell carcinoma of skin	1.28121e-06	45	BRAF;CCND1;CD44;CDC42;CDKN1A;CKS1B;CTNNA1;EGF;EGFR;EPHB2;ERBB2;ERBIN;HDAC9;HRAS;IGF1R;LZTS1;MAP3K4;MAPK1;MCL1;MLH1;MSH2;MYC;NOTCH1;NR3C1;PARD3;PCBP1;PCNA;PIK3CA;PIK3CB;PLK1;PPARG;PTCH1;PTPRD;RASA1;SEM1;SHH;SIRT1;SMAD4;SRC;STAT1;STAT3;THBS1;TP53;VIM;YBX1
Malignant neoplasm of ovary	0.00300247	185	ABCA1;ABL1;ACACA;ACTN4;AKAP12;APAF1;APC;APC2;ARID1A;ASPM;ATM;ATP7A;ATR;BCL9;BCR;BLM;BRCA1;BRCA2;BRD7;BUB1;CABIN1;CDK12;CHAF1A;CHD4;COL4A3BP;CREBBP;CSE1L;CTCF;CTNNB1;CTNND1;CTNND2;CUL1;CUL3;CYFIP2;DAXX;DCAF1;DDB1;DDR1;DDX1;DICER1;DNMT1;DOCK1;DROSHA;DST;EIF3A;EP300;EPB41;EPHA3;EPHB2;ERBB2;ESPL1;EWSR1;FANCD2;FASN;FBN1;FBN2;FBN3;FGFR1;FN1;GAS1;GLI2;GNAS;GREB1;GTF2I;HDAC2;HDAC3;HIF1A;HSD17B4;HSPA4;HSP…		Luminal A Breast Carcinoma	1.28121e-06	31	AR;BRCA1;CCNB1;CCND1;DICER1;DNMT1;EGF;EGFR;ERBB2;ESPL1;ESR1;FGFR1;GSTP1;IGF1R;IGF2R;KRT8;LRPPRC;MAP3K1;MYC;NCOA1;NCOA3;PARP1;PCNA;PIK3CA;PTEN;RELA;SRC;STAT3;TP53;VIM;ZNF217
Congenital dislocation of radial head	0.00304715	6	ATR;CREBBP;EP300;FLNA;NIPBL;NOTCH2		Squamous cell carcinoma of lung	1.44857e-06	48	AKT1;AP2M1;BIRC6;BRAF;BRCA2;CCAR2;CCND1;CDKN1A;COL17A1;CSNK2A1;EGFR;EIF4E;EIF4G1;EML4;ERBB2;FGFR1;FUS;FXR1;GMNN;GPC3;GRAMD4;GSTP1;HLA-A;HLA-C;HRAS;IGF2R;LCK;MALAT1;MDM2;MLH1;MSH2;MYC;NME1;PEG10;PIK3CA;PIK3CB;PROM1;PTK2;PTPN13;RAD18;SIRT1;SRSF1;SRSF2;STAT1;STAT3;TP53;USP7;VIM
FANCONI ANEMIA, COMPLEMENTATION GROUP D2	0.00304715	6	BRCA1;FANCD2;FANCI;REV3L;USP1;WDR48		Malignant Childhood Neoplasm	1.4994e-06	27	APEX1;ARID1A;ARID1B;AURKA;BRCA1;BRCA2;BUB1B;DAXX;ERBB2;ESR1;EWSR1;EZR;IGF2R;KMT2A;MLH1;MSH3;MTR;PALB2;PIK3CA;PIK3CB;RAD9A;RB1;SHH;SMARCA1;THBS1;TP53;YWHAE
Sotos' syndrome	0.00304715	6	APC2;EPHB2;NSD1;NSD2;PREP;SETD2		Uterine Cancer	1.52588e-06	24	AKT1;AURKA;BARD1;BIRC5;BRAF;BRCA1;BRCA2;CCND1;EGFR;ERBB2;ESR1;HMGA1;HSPA8;MLH1;MSH2;NES;PIK3CA;PIK3CB;PPP2R1A;PTEN;PTK2;SKP2;VCL;ZEB1
Distal limb muscle weakness due to peripheral neuropathy	0.00304715	15	AARS;ABCA1;ATP7A;DCTN1;DYNC1H1;FIG4;GARS;HK1;KIF1B;MFN2;PNPLA6;POLG;SACS;SETX;VCP		HER2 gene amplification	1.56273e-06	22	ABCA1;BRAF;BRCA1;CCND1;CRK;CTNNB1;EGF;EGFR;EIF3A;ERBB2;ESR1;FASN;IGF1R;INTS2;MAPK1;MAPK14;PIK3CA;PTEN;RPS6KB1;TOP2A;TP53;YY1
Distal muscle weakness	0.00304715	15	AARS;ABCA1;ATP7A;DCTN1;DYNC1H1;FIG4;GARS;HK1;KIF1B;MFN2;PNPLA6;POLG;SACS;SETX;VCP		Hereditary gingival fibromatosis	1.60046e-06	28	ASH1L;CAV1;CDK2;CDK9;CDKN1A;EGFR;EPHB2;EZR;FN1;HIF1A;LRP5;MAPK1;MAPK14;MAPK8;NGF;NOTCH3;ODC1;PCNA;PIK3CA;PIK3CB;RUNX2;SDC1;SERPINH1;SETD2;SHH;SOS1;TP53;TSC2
Spina Bifida Occulta	0.00308197	7	CREBBP;CUL7;EP300;FLNB;PTCH1;PTPN11;RFC1		Pseudomyxoma Peritonei	1.70646e-06	12	AKT1;APC;CDH1;CDH2;EPHB2;GNAS;HIF1A;MAPK1;PIK3CA;PIK3CB;TP53;VIM
Seizures	0.0031553	115	ADAR;ADGRV1;AFF2;AMPH;ANKRD11;AP3D1;APBB1;ARFGEF2;ARID1A;ASPM;ATM;ATP5A1;ATP7A;ATR;ATRX;BCOR;BRCA2;BRD1;CABIN1;CACNA1H;CAD;CASK;CC2D2A;CCDC88A;CENPE;CHD2;COL4A2;CPS1;CPT2;CREBBP;CRMP1;CTNNB1;CUL4B;DGKD;DIAPH1;DYNC1H1;ELFN1;EML1;EP300;EPHB2;EWSR1;FASTKD2;FBN1;FGFR1;FIG4;FLNA;FN1;GLDC;GLI2;GLI3;GNAS;HDAC2;HIP1;HNRNPU;HSD17B4;HSPA4;HSPD1;HTT;IFT140;IMMT;KAT6B;KDM3B;KDM5C;KIF4A;KIF5C;KMT2D;LARS;LYST;…		Malocclusion	1.76032e-06	25	ATR;BAZ1B;BCOR;BRAF;CLIP2;CREBBP;DCHS1;ELN;EP300;FLNA;GJA1;GLI2;GPC3;GRIP1;GTF2I;IGF1R;LRP5;NOTCH2;NR3C1;PIK3R1;PTCH1;PTPN11;RFC2;SMAD3;SOS1
Lens Opacities	0.00324593	36	ALMS1;BCOR;BUB1;CASK;CPT2;CREBBP;EP300;FBN1;FIG4;FLNB;GNAS;HSPG2;IARS2;IFT140;IFT172;JAG1;LONP1;LRP5;MYH9;NF2;NOTCH1;OCRL;PEX1;PEX5;PHGDH;PIK3CA;PIK3R1;POLG;PRPF6;PRPF8;PTCH1;RAB3GAP2;RB1;SNRNP200;VCAN;ZNF592		Therapy-Related Acute Myeloid Leukemia	1.90843e-06	21	ASXL1;BCR;BRCA1;BRCA2;CREBBP;EIF4E;FN1;GSTP1;KAT6A;KMT2A;MDM2;MSH2;NPM1;NUP98;PAFAH1B1;PTPN11;RAD51;SF3B1;TOP2A;TP53;YWHAE
Abnormality of the metaphyses	0.00330866	12	ATP7A;CUL7;FLNA;HSPG2;IFT140;IFT172;INPPL1;LEMD3;NOTCH3;OBSL1;PCNT;SEC24D		Anaplasia	1.90843e-06	58	AKT1;AR;BRAF;BRCA1;CALR;CAV1;CCND1;CD44;CDH1;CDK4;CFTR;DICER1;EGF;EGFR;EPHB2;ERBB2;ESR1;FGFR1;HIF1A;HNRNPA2B1;IGF1R;JUN;KRT8;MAPK1;MAPK14;MIB1;MKI67;MUM1;MYC;NCOA1;NCOA3;NES;NF1;NOTCH1;NOTCH2;NPEPPS;PIK3CA;PKD1;PLK1;PPARG;PROM1;PTCH1;PTEN;RAC1;RAD51;SDC1;SKP2;SMAD2;SMARCA1;SMARCA4;SRC;TAGLN;TJP1;TP53;TTF1;VDR;VIM;ZEB1
Muscle Spasticity	0.00330866	40	AARS;ADAR;ALS2;ANK3;ATM;ATP13A2;ATP7A;ATRX;BAZ1B;CASK;CLIP2;COL4A2;DCTN1;DNMT1;FIG4;FUS;GARS;GBA2;GTF2I;HTT;IFT122;KDM5C;KIF1C;NDUFS1;NOTCH3;OPA1;PEX1;PEX5;PLCD1;PNPLA6;POLR3A;POLR3B;RAB3GAP2;RPA1;SACS;SPAST;SPG11;UNC13A;VCP;ZNF592		Anemia, Macrocytic	1.90843e-06	16	ASXL1;LARS;PAFAH1B1;RPL11;RPL26;RPL35A;RPS14;RPS17;RPS19;RPS24;RPS28;RPS29;RPS7;SF3B1;TP53;YWHAE
Aggressive reaction	0.00337452	17	AFF2;ANK3;ATP13A2;BCOR;CHD2;CUL4B;FIG4;GLDC;HERC2;KDM5C;KMT2A;MED12;OCRL;SIN3A;SPAST;VCP;VPS13A		Secondary malignant neoplasm of lung	1.90843e-06	110	AGO2;AKAP12;ANXA2;AR;ARHGEF17;ARID1A;ATF4;ATF7IP;ATM;BCAR1;BRAF;BRCA1;BRCA2;CALR;CAPRIN1;CAV1;CD44;CDC42;CDK5;CNR1;CTNNB1;CTTN;DIAPH1;DNER;DROSHA;EGF;EGFR;EIF4A1;EIF4A2;EML4;EPHB2;ERBB2;ESR1;EZR;FASN;FBXW11;FMR1;FN1;FUS;GJA1;GRB2;HIF1A;HLA-C;HRAS;IGF1R;INSR;IQGAP1;KANK2;LRP1;MALAT1;MAP4K4;MAPK1;MAPK14;MAPK8;MDM2;MGAT3;MLH1;MSH2;MTA2;MYC;MYO10;NCAM1;NCOA1;NCOA3;NES;NISCH;NME1;NOTCH2;NUP214;PCBP1;P…
Malignant Childhood Neoplasm	0.00353651	16	ARID1A;ARID1B;BRCA1;BRCA2;DAXX;ERBB2;EWSR1;IGF2R;KMT2A;MSH3;MTR;PALB2;PIK3CA;PIK3CB;RB1;SMARCA1		ECTRODACTYLY, ECTODERMAL DYSPLASIA, AND CLEFT LIP/PALATE SYNDROME 1	1.90843e-06	23	AKT1;APC;AURKA;CCND1;CDH1;CDKN1A;CRK;CTCF;CTNNB1;EIF4A1;ESR1;MALAT1;MAPK1;MAPK14;MYC;PCNA;PIK3CA;PIK3CB;PIK3R1;PRDX6;PTEN;TP53;ZFHX3
Abnormally small eyeball	0.00360687	20	BCOR;BUB1;CHD7;FANCD2;FGFR1;GLI2;GLI3;GRIP1;HDAC6;LRP5;NOTCH1;OCRL;PHGDH;PIK3CA;PTCH1;RAB3GAP2;RB1;SIN3A;SMCHD1;ZNF592		Sporadic Breast Carcinoma	1.90843e-06	43	AR;ATM;ATR;BARD1;BRCA1;BRCA2;CAV1;CCND1;CDH1;CDK2;CDK4;CTCF;DNMT1;ERBB2;ESR1;FANCA;FANCD2;GSTP1;H2AFX;HIF1A;HMGA1;IGF1R;MLH1;MSH2;MSH3;MSH6;MYC;NF1;NR3C1;NUP214;PARP1;PCNA;PHB;PHRF1;PIK3CA;PTBP1;PTEN;RAD51;RB1;SRRM2;TP53;VDR;WDTC1
Decreased size of eyeball	0.00360687	20	BCOR;BUB1;CHD7;FANCD2;FGFR1;GLI2;GLI3;GRIP1;HDAC6;LRP5;NOTCH1;OCRL;PHGDH;PIK3CA;PTCH1;RAB3GAP2;RB1;SIN3A;SMCHD1;ZNF592		Diffuse Large B-Cell Lymphoma	1.90843e-06	107	AKT1;APC;APEX1;ARID1A;ATM;ATP7A;BCR;BIRC5;BRAF;BRCA1;BRCA2;BYSL;CALM1;CALM2;CALM3;CCAR1;CCND1;CD44;CDC7;CDH1;CDK2;CDK4;CDKN1A;CLTC;CREBBP;CSE1L;DAXX;DNER;EIF4B;EIF4E;EIF4G3;EML4;EP300;ETFA;EXOC2;EZR;FASN;FBXO11;GPX1;GSTP1;H2AFX;HDAC3;HDAC4;HDAC6;HDAC9;HIF1A;HLA-C;HSP90AA1;JAK2;KMT2A;KMT2B;KMT2D;LEF1;LONP1;MAP4;MAP4K4;MCL1;MDM2;MIB1;MKI67;MLH1;MSH2;MSH3;MTHFD2;MTOR;MTR;MUM1;MYC;NGF;NME1;NOS2;NOTCH…
Congenital small ears	0.00360687	14	ATR;ATRX;DCHS1;EFTUD2;GLI3;NIN;NSD2;ORC1;PCNT;PLEC;POLR1A;RBM10;SALL1;TTC37		Full lower lip	1.9162e-06	26	ARID1A;ATRX;BAZ1B;BRAF;CLIP2;CUL4B;CUL7;ELN;FBN1;GTF2I;HRAS;INSR;KAT6B;KIF11;MED12;ORC1;PHGDH;PTPN11;RFC2;SIN3A;SMARCA2;SMARCA4;SMS;SOS1;SOS2;ZBTB20
Curvature of digit	0.00360687	14	ANKRD11;ATRX;BCOR;DCHS1;FGD1;HERC2;IGF1R;MED12;PHGDH;PIK3R1;PTPN11;RBM10;ROR2;SIN3A		Prominent lower lip	1.9162e-06	26	ARID1A;ATRX;BAZ1B;BRAF;CLIP2;CUL4B;CUL7;ELN;FBN1;GTF2I;HRAS;INSR;KAT6B;KIF11;MED12;ORC1;PHGDH;PTPN11;RFC2;SIN3A;SMARCA2;SMARCA4;SMS;SOS1;SOS2;ZBTB20
Recurrent tumor	0.0036374	42	APC;ATM;BRCA1;BRCA2;CENPE;DOCK11;ERBB2;FANCD2;HDAC3;HK1;HSPA9;IGF1R;INTS2;KIF3C;LPCAT1;LZTS1;MCM2;MIB1;MKI67;MSH2;MSH6;MTOR;NCAPD3;NCOR2;NES;ODC1;PARP1;PEG10;PI4KA;PIK3CA;PIK3CB;PLS3;POLD1;PTCH1;SALL4;STAT3;TTF1;VCP;WNK1;XRCC5;XRCC6;ZEB1		Noninfiltrating Intraductal Carcinoma	2.18135e-06	63	AKT1;AR;ATM;AURKA;BCL9;BRCA1;BRCA2;CAV1;CCND1;CD44;CDH1;CDKN1A;CHEK1;CREBBP;CTCF;CTNNB1;EGFR;EIF4E;ERBB2;ESR1;FASN;FAT1;FGFR1;GSN;GSTP1;HEATR6;HIF1A;IRS1;IRS2;KDM2A;KIAA0100;LDHB;LPCAT1;MKI67;MSH6;MYC;NCOA2;NCOA3;NCOR1;NCOR2;NME1;NOTCH1;NRDC;NRIP1;PAK1;PARP1;PCNA;PIK3CA;PIK3CB;PTBP1;PTCH1;PTEN;RAC1;SDC1;SMAD4;SREBF1;SRRM2;STAT1;STAT5B;TERF2;TOP2A;TP53;VIM
Congenital anomaly of the kidney	0.0036374	11	CREBBP;EP300;FBN1;KMT2B;KMT2D;LRP4;NOTCH2;NSD2;RAI1;SMARCAL1;TBC1D1		Narrow cranium shape	2.18135e-06	28	AKT1;APC2;ATRX;BLM;BRAF;CUL7;FBN1;FBN2;FIG4;GLI3;HERC2;HNRNPK;HSD17B4;INPPL1;JAG1;NOTCH2;NOTCH3;NSD2;OBSL1;ORC4;PEX1;PEX5;PI4KA;PTEN;SETD2;TRIM37;UBA1;VDR
Malformed pinnae	0.0036374	11	BCOR;CHD7;FGD1;GRIP1;KIF1A;PEX1;PEX5;POGZ;RAI1;SALL1;SIN3A		Narrow head shape	2.18135e-06	28	AKT1;APC2;ATRX;BLM;BRAF;CUL7;FBN1;FBN2;FIG4;GLI3;HERC2;HNRNPK;HSD17B4;INPPL1;JAG1;NOTCH2;NOTCH3;NSD2;OBSL1;ORC4;PEX1;PEX5;PI4KA;PTEN;SETD2;TRIM37;UBA1;VDR
Decreased motor NCV	0.00381467	8	AARS;CCT5;DYNC1H1;HK1;KIF1B;MFN2;SETX;SLC12A6		Narrow skull shape	2.18135e-06	28	AKT1;APC2;ATRX;BLM;BRAF;CUL7;FBN1;FBN2;FIG4;GLI3;HERC2;HNRNPK;HSD17B4;INPPL1;JAG1;NOTCH2;NOTCH3;NSD2;OBSL1;ORC4;PEX1;PEX5;PI4KA;PTEN;SETD2;TRIM37;UBA1;VDR
Mammary Neoplasms	0.00393078	218	ABCA1;ABL1;ACACA;ADGRL2;AFDN;AKAP12;AKAP13;AKAP9;AP2A1;APC;APC2;ARFGEF1;ARID1A;ATAD2;ATM;ATP2B1;ATP2C1;ATRX;BCAR1;BCORL1;BCR;BLM;BRCA1;BRCA2;BRD7;CACNA1H;CCAR2;CCT5;CDH2;CENPF;CHAF1A;CLSPN;COL4A2;CREBBP;CTCF;CTNNB1;CTNND1;CUL5;DCAF1;DDR1;DDX46;DDX5;DHX16;DICER1;DNMT1;DOCK1;DYNC2H1;EEF2;EIF3A;ENC1;EP300;EPHA3;EPHB2;ERBB2;ESPL1;F8;FANCD2;FASN;FAT4;FGFR1;FLNA;FN1;FYN;GLI2;GREB1;GSN;HDAC3;HDAC6;HEATR…		Turridolichocephaly	2.18135e-06	28	AKT1;APC2;ATRX;BLM;BRAF;CUL7;FBN1;FBN2;FIG4;GLI3;HERC2;HNRNPK;HSD17B4;INPPL1;JAG1;NOTCH2;NOTCH3;NSD2;OBSL1;ORC4;PEX1;PEX5;PI4KA;PTEN;SETD2;TRIM37;UBA1;VDR
Abnormality of cardiovascular system morphology	0.00393078	10	ARID1A;DAAM1;FGFR1;FLII;FLNA;PIK3CA;RAI1;RB1;SIN3A;SMARCA4		Joint laxity	2.19979e-06	24	ADNP;ATP7A;CBL;CREBBP;CUL4B;DCHS1;EFNB1;ELN;EP300;FBN1;FLNB;FMR1;FN1;LTBP4;MED12;NOTCH2;ORC1;OTX2;PIK3CA;PIK3R1;SEC23A;SERPINH1;SIN3A;SMAD3
Macrocephaly	0.00393078	10	BRWD3;CHD8;HERC1;LEMD3;LRP5;MTOR;PIK3CA;PIK3CB;PPP2R5D;TSC2		Prostatic Intraepithelial Neoplasias	2.3811e-06	45	AKAP12;AKT1;ANXA2;AR;AURKA;CAV1;CCND1;CDH1;DNMT1;EGFR;ERBB2;ESR1;EZR;FASN;FYN;GSTP1;HDAC1;HIF1A;HSP90AA1;IQGAP2;IRS2;KDM4A;KRT8;LONP1;MCM7;MIB1;MKI67;MYC;NME1;NPEPPS;PIK3CA;PIK3CB;PLK1;PTEN;PTK2;RELA;RXRA;SENP1;SETD2;SIRT1;TERF1;TOP2B;TP53;VIM;WNK1
Sensorineural Hearing Loss (disorder)	0.00395665	48	ACTG1;ATP1A1;ATRX;BAZ1B;BCOR;CASK;CEP250;CLIP2;DCHS1;DIAPH1;DNMT1;FASTKD2;FGFR1;FLNA;GTF2I;HSD17B4;IARS2;IFT140;IFT172;IMMT;KMT2D;LONP1;LRP2;LRP4;LRP5;MED12;MTR;MYH9;NDUFS1;NF2;NIPBL;OGDH;OPA1;PCNT;PEX1;PEX5;PIK3R1;PNPLA6;POLD1;POLG;PRPF6;PRPF8;PTPN11;RAD21;SMC3;SMCHD1;SNRNP200;VPS13B		Atypical teratoid/rhabdoid tumor	2.63608e-06	19	ACACA;AKT1;ATM;AURKA;BMS1;BRAF;CCND1;EGF;EWSR1;FBXW11;IGF1R;INSR;MYC;NF2;PHF5A;PIK3CA;PIK3CB;PROM1;SMARCA4
Isolated somatotropin deficiency	0.00400802	12	ALMS1;FLNB;GLI2;GLI3;GNAS;HERC2;IARS2;IFT172;PNPLA6;SIN3A;STAT5B;WASHC5		Cervical Intraepithelial Neoplasia	2.66371e-06	51	ABCA1;ANXA2;APC;ARID1A;ASAP1;ATM;BIRC5;BUB1;CD44;CDC6;CDKN1A;CHEK1;DNMT1;EGFR;EIF4G2;ERBB2;ESR1;EZR;FN1;GEMIN4;HLA-A;HLA-C;HRAS;KDM4B;LAMB2;LRBA;MCM5;MDM2;MIB1;MKI67;MLH1;MTR;MYC;NES;NME1;PCNA;PIK3CA;PSMD2;PTCH1;PTEN;RAN;RBBP4;ROBO1;ROBO2;SERPINH1;STAT3;THBS1;TP53;TP53BP1;VCP;WDHD1
Open mouth	0.00400802	12	ATRX;CCDC88A;DST;FLII;KIF1A;MED12;PLXND1;PPP2R1A;PPP2R5D;RAI1;REV3L;SIN3A		Malignant neoplasm of kidney	2.67568e-06	76	AKT1;AMER1;ANXA2;APAF1;APC;ARID1A;AURKA;BIRC5;BRAF;CABIN1;CALM1;CALM2;CALM3;CAV1;CCND1;CD44;CDH1;CDK2;CTNNB1;DDR1;EGF;EGFR;EPHB2;ERBB2;FN1;GNAS;GSTP1;HIF1A;HLA-C;HSP90AA1;IGF1R;KANK1;KDM5C;MALAT1;MAPK1;MAPK8;MCL1;MDM2;MLH1;MSH2;MSH3;MTOR;MYC;MYLK;NME1;NOS2;NUP214;PAK1;PBRM1;PCNA;PIK3CA;PIK3CB;PIK3R1;PKD1;PLK1;PROM1;PTEN;PTPRU;RARA;ROBO1;ROCK1;RPSA;SETD2;SMAD4;SMARCA1;SPAG9;SPHK1;SRSF1;STAT3;TBC1D…
Isolated cases	0.00404243	16	CHD7;CREBBP;EP300;FGFR1;FLNB;GLI2;GNAS;HERC2;LEMD3;NIPBL;NSD2;PIK3CA;RAI1;RB1;SIN3A;UBE3A		Pectus excavatum	2.69886e-06	35	AKT1;ATP7A;BCOR;BRAF;CBL;CREBBP;CUL7;EFNB1;EP300;FBN1;FGD1;FLNA;FLNB;FMR1;GPC3;HNRNPK;HSD17B4;IGF1R;KAT6B;KDM5C;MED12;MEGF8;NOTCH3;PIK3CA;PPP2R1A;PTCH1;PTEN;PTPN11;RAB3GAP2;ROR2;SEC24D;SMS;SOS1;SOS2;ZBTB20
Congenital clinodactyly	0.00426083	14	ANKRD11;ATRX;BCOR;DCHS1;FGD1;HERC2;IGF1R;MED12;PHGDH;PIK3R1;PTPN11;RBM10;ROR2;SIN3A		Long narrow head	3.05213e-06	28	AKT1;APC2;ATRX;BLM;BRAF;CUL7;FBN1;FBN2;FIG4;GLI3;HERC2;HNRNPK;HSD17B4;INPPL1;JAG1;NOTCH2;NOTCH3;NSD2;OBSL1;ORC4;PEX1;PEX5;PI4KA;PTEN;SETD2;TRIM37;UBA1;VDR
Prominent ear	0.00426083	14	ACSL3;ANKRD11;BAZ1B;BLM;CLIP2;CUL7;FGFR1;GTF2I;KIF11;KMT2D;OBSL1;OCRL;PTPN11;RB1		Parkinson Disease	3.0863e-06	174	ABL1;ACACA;ACO1;AFF2;AKT1;APAF1;APBB1;AR;ATM;ATP13A2;ATP2C1;ATP7A;ATRX;BMS1;CAPN1;CDC42;CDK5;CDKN1A;CNR1;CRK;CRMP1;CTSC;DAXX;DCTN1;DNAJC13;DNMT1;DST;EGF;EIF2S2;EIF4A2;EIF4E;EIF4G1;EPHB2;ESR1;FAF1;FARP1;FMR1;FTL;FUS;FYN;GLI2;GPX1;GSK3B;GSTP1;HDAC1;HDAC2;HDAC6;HIF1A;HIST1H1C;HIST1H3A;HIST1H3B;HIST1H3E;HIST1H3F;HIST1H3G;HIST1H3H;HIST1H3J;HLA-A;HLA-C;HMGXB3;HSPA4;HSPA8;HSPA9;HSPD1;HTR2C;HTT;IDE;IGF1R…
Leukemia, Myelomonocytic, Chronic	0.00443629	19	ABL1;ASXL1;BCOR;BCORL1;BCR;CREBBP;EPHB2;FGFR1;HIP1;HTT;KMT2A;MYH10;NF1;PTPN11;RABEP1;RARS;SETD2;SF3B1;TET1		Central Serous Chorioretinopathy	3.10174e-06	31	AKT1;APC;CBX5;CD44;CDK2;CDKN1A;DCLK1;DNMT1;EGFR;GSK3B;HDAC2;HIST1H4A;HIST1H4B;HIST1H4C;HIST1H4D;HIST1H4E;HIST1H4H;HIST1H4I;HIST1H4K;JAG1;MAPK1;NOTCH1;PIK3CA;PIK3CB;PROM1;PTEN;SMAD2;SMAD3;STAT3;VIM;ZEB1
Phthisis bulbi	0.00453642	4	LRP5;NIPBL;RAD21;SMC3		Mucoepidermoid Carcinoma	3.25524e-06	24	APC;ATM;BRAF;CCND1;CDH1;CDK4;CENPF;CFTR;CREB1;CTNNAL1;CTNNB1;DICER1;DNMT1;EGFR;EPHB2;ERBB2;EWSR1;MAPK1;MCL1;MSH3;MTOR;NUMA1;STAT3;TP53
Pseudomyxoma Peritonei	0.00455394	7	APC;CDH2;EPHB2;GNAS;HIF1A;PIK3CA;PIK3CB		Malignant neoplasm of mouth	3.41076e-06	85	AKT1;APC;AR;ATM;AXIN1;BCAR1;BIRC5;BRAF;CAV1;CCND1;CD44;CDC20;CDH1;CDK4;CDKN1A;CTNNA1;CTNNB1;DICER1;DSP;EGF;EGFR;EPHB2;ERBB2;FAT1;FN1;GPX1;GSTP1;HIF1A;HRAS;HSP90AA1;HSPA4;IGF2R;JAK2;JUN;KDM1A;KIF4A;LPCAT1;MAPK1;MAPK14;MAPK6;MCL1;MDM2;MLH1;MMRN1;MSH2;MTOR;MYC;MYO1B;NPM1;ODC1;PARP1;PCBP2;PCNA;PIK3CA;PIK3CB;PLK1;PRDX1;PROM1;PTBP1;PTEN;PTPN11;PTPRZ1;RAC1;RAD17;RELA;SIRT1;SKP2;SMAD4;SMARCA4;SOS1;SP1;SR…
solid tumor	0.00494903	82	ABCA1;ABCC4;ABL1;ACO1;APC;ASXL1;ATM;BCR;BRCA1;BRCA2;BUB1;CLSPN;COL4A2;DDX1;DICER1;DNMT1;EML4;EP300;EPHA3;EPHB2;ERBB2;EWSR1;FANCD2;FASN;FAT1;FGFR1;FLII;FN1;FUS;FXR1;GNAS;HDAC2;HIF1A;HK1;HSPA4;HSPG2;IFT172;IGF1R;KDM1A;KIF11;KIF14;KMT2A;KMT2B;KMT2C;KMT2D;LONP1;LRIG1;MFHAS1;MMRN1;MSH2;MTA2;MTOR;NBR1;NES;NOTCH1;NOTCH3;NRIP1;OSBP;PARP1;PIK3CA;PIK3CB;PLXND1;PTPN11;RB1;ROBO1;SALL2;SALL4;SETD2;SF3B1;SLU7;…		Defective enamel matrix	3.50816e-06	16	AMBN;ATR;CREBBP;EP300;FLNB;GJA1;GNAS;ITGA6;LONP1;NF1;OCRL;PCNT;PEX1;PLEC;RUNX2;VDR
Syndactyly of fingers	0.00494903	12	BCOR;FGD1;FGFR1;FLNB;GLI3;GRIP1;MEGF8;NOTCH1;PHGDH;PIK3CA;PNPLA6;RB1		Dysplasia of tooth enamel	3.50816e-06	16	AMBN;ATR;CREBBP;EP300;FLNB;GJA1;GNAS;ITGA6;LONP1;NF1;OCRL;PCNT;PEX1;PLEC;RUNX2;VDR
Wide spaced nipples	0.00494903	12	CHD7;COL4A3BP;CPT2;FGFR1;GRIP1;IGF1R;KAT6B;MEGF8;PACS1;PTPN11;SOS1;SOS2		Thin dental enamel	3.50816e-06	16	AMBN;ATR;CREBBP;EP300;FLNB;GJA1;GNAS;ITGA6;LONP1;NF1;OCRL;PCNT;PEX1;PLEC;RUNX2;VDR
Peripheral pulmonary artery stenosis	0.00494903	6	BAZ1B;CLIP2;FGFR1;GTF2I;JAG1;NOTCH2		Skin endocrine disorder	3.59187e-06	45	AKT1;APC;AR;ATM;BRAF;BRCA1;BRCA2;CAV1;CCND1;CDK4;EGF;EGFR;EPHB2;ERBB2;ESR1;FGFR1;FMR1;FYN;GNAS;HDAC6;HIF1A;HSP90AA1;IGF1R;INTS2;MAPK1;MSH6;MTOR;NCOA1;NCOA3;NF1;PAK1;PCNA;PIK3CA;PLCB3;PPARG;RACGAP1;RB1;SMAD3;SMAD4;SMS;TBC1D9;TP53;TXN;VDR;VHL
Bladder Neoplasm	0.00502512	111	AGL;ANKFY1;APAF1;APC;ARID1A;ASAP1;ATG2B;ATM;ATR;BCAR1;BLM;BPTF;BRCA1;BUB1;CCAR2;CDH2;CHD6;CREBBP;CTCF;CTNNA1;CTNNB1;CUL3;DICER1;DLG5;DNMT1;DROSHA;EIF3B;EIF4G2;EOMES;EP300;ERBB2;ESPL1;FGFR1;FLNA;FN1;FYN;GAS1;GEMIN4;GLI2;GNAS;GSN;HDAC2;HIF1A;HSPA4;IGF1R;INTS2;IQGAP1;JAG1;JUP;KDM5B;KIDINS220;KIF20B;KMT2A;KMT2C;KMT2D;LIG3;LRIG1;LRP6;LZTS1;MAP4;MCM2;MDC1;MIB1;MKI67;MSH2;MSH3;MSH6;MTA2;MTOR;MTR;NCOA3;N…		Exanthema	3.60469e-06	72	AKT1;APC;AR;ATM;BCR;BRAF;BRCA1;BRCA2;CD44;CDK2;CFTR;CREBBP;CRK;CTCF;EEF2;EGF;EGFR;ERBB2;FANCD2;FBN1;FBXO11;FMR1;FN1;GJA1;GNAS;GSN;HADHA;HLA-A;HLA-C;HRAS;HSPA8;HSPG2;IGF1R;INTS2;KMT2A;KRT8;LRP1;LRP2;MAPK1;MLH1;MSH2;MSH6;MYO9B;NCL;NES;NF1;NOTCH1;NPM1;PBX1;PIK3CA;PIK3CB;PIK3R1;PKD1;PNP;PRDX1;PTCH1;PTEN;PTPN11;RB1;RUNX2;SOD1;SPTAN1;SRC;SRSF2;STAT1;STAT3;TOP2A;TP53;TSC2;TXN;VIM;ZFHX3
Weakness of lower limb	0.00502512	10	DCTN1;DYNC1H1;HSPD1;IMMT;KIF1A;KIF5A;NF1;SPAST;WASHC5;ZFYVE26		Malignant neoplasm of skin	3.63377e-06	58	AGO2;AKT1;AR;ATP7A;AURKA;BRAF;BRCA1;CCND1;CD44;CDK2;CDK4;CDKN1A;CRK;EGFR;EPHB2;ERBB2;GSTP1;HRAS;ITGA6;JAG1;JUN;KDM5B;MAPK1;MAPK14;MDM2;MSH2;MSH3;NOTCH1;NOTCH3;OCRL;PAK1;PCNA;PLEKHM2;PTCH1;PTEN;RAC1;RAD9A;SASH1;SDC1;SEM1;SF3B6;SHH;SIRT1;SKP1;SMAD2;SMAD3;SMAD4;SMARCA2;SMARCA4;SNW1;SRSF6;STAT3;TERF1;TERF2;TNKS2;TP53;VCAN;VDR
Micromelia	0.00506437	14	CUL7;FLNA;FLNB;HSPG2;IFT140;IFT172;INPPL1;NBAS;NIPBL;OBSL1;PCNT;PHGDH;RAD21;SMC3		Precursor B-cell lymphoblastic leukemia	4.09974e-06	74	ABL1;AKT1;ANXA2;ASPM;ATM;BAZ2A;BCL9;BCR;BIRC5;BLM;BRCA1;BRCA2;CALM1;CALM2;CALM3;CCND1;CD44;CDK2;CHD8;DLL1;DNER;EIF2AK2;ELN;EP300;EPHB2;ESR1;EWSR1;FANCD2;FAT1;FGFR1;HDAC1;HDAC3;HIF1A;HLA-C;HSD17B4;HSP90AA1;INSR;JAK2;KMT2A;LEF1;LIG3;LONP1;LTA4H;MAPK1;MAPRE1;MCL1;MDM2;MTOR;MYC;MYLK;NOTCH1;NOTCH3;NR3C1;PARP1;PBX1;PCM1;PEG10;PPARG;PTEN;PTPN11;PTPRG;RARA;RFC1;SALL4;SDC1;SHC1;SMAD3;SMCHD1;SMS;STAT5B;TBC…
Chronic eosinophilic leukemia	0.00533678	9	ABL1;BCR;CCDC88C;CDK5RAP2;FGFR1;NOS2;PCM1;STAT3;STAT5B		High forehead	4.83532e-06	34	ANKRD11;APC2;ATP7A;BAZ1B;BRAF;BUB1B;CLIP2;CPT2;CTBP1;ELN;ETFA;FGFR1;GJA1;GLI3;GTF2I;HSD17B4;KAT6B;LRP5;MED12;NSD2;PAFAH1B1;PEX1;PEX5;PIK3CA;PTPN11;RFC2;SERPINH1;SETD2;SIN3A;SOS1;SOS2;SZT2;WASHC5;YWHAE
Adenomatous Polyposis Coli	0.00534075	50	AMER1;APC;APC2;ARHGEF2;ATM;BLM;BRCA1;BRCA2;CLASP2;CTNNB1;CTNND1;DNMT1;EPHB2;ERBB2;FBXW11;FOCAD;GSN;HDAC2;HIF1A;HLTF;IQGAP1;IRS2;LRP5;MIB1;MKI67;MSH2;MSH3;MSH6;MTOR;NES;NF1;NOS2;NUP214;ODC1;PALB2;PARP1;PHGDH;PIK3CA;POLD1;PRKDC;PTCH1;RB1CC1;SCRIB;SOS1;SPEN;STAT3;TBC1D9;TNKS;WNK1;ZEB1		Tall forehead	4.83532e-06	34	ANKRD11;APC2;ATP7A;BAZ1B;BRAF;BUB1B;CLIP2;CPT2;CTBP1;ELN;ETFA;FGFR1;GJA1;GLI3;GTF2I;HSD17B4;KAT6B;LRP5;MED12;NSD2;PAFAH1B1;PEX1;PEX5;PIK3CA;PTPN11;RFC2;SERPINH1;SETD2;SIN3A;SOS1;SOS2;SZT2;WASHC5;YWHAE
Neurodevelopmental Disorders	0.00534075	23	ANK3;ANKRD11;ARID1B;CHD7;EHMT1;EIF3A;EIF4G1;EPG5;HCFC1;HTT;KDM5B;KDM5C;KMT2D;MTOR;POGZ;RAI1;SETD1A;SMARCA1;SMARCA4;TSC2;UBE3A;USP7;VPS13B		Papilloma	4.83791e-06	46	AKT1;AR;AURKA;CAV1;CCND1;CDK4;CDKN1A;EGF;EGFR;EPHB2;ERBB2;ESR1;HLA-C;HMGA1;HRAS;ILF2;INTS2;MAPK1;MDM2;MIB1;MKI67;MLH1;MYC;NOTCH1;ODC1;OTX2;PIK3CA;PIK3CB;PKD1;PPARG;PTEN;PXN;RAC1;RASA1;RB1;RBL2;SCRIB;SDC1;SEC23B;SRSF1;STAT3;THBS1;TP53;TSC2;TXN;UBE3A
Small cell carcinoma of lung	0.00534826	71	ABCA2;ABCC4;ACACA;ACTN4;APC;ASH1L;ATM;ATP7A;BLM;BMS1;CAPN1;COL4A2;CREBBP;DCLRE1A;DIP2C;DYNC2H1;EML4;EP300;EPHA7;EPHB2;ERBB2;FBN2;FBXW11;FGFR1;FN1;FUS;HIF1A;IGF1R;KAT6B;KIF21A;KMT2A;LRP1;MGA;MKI67;MSH3;MTOR;NES;NF1;NOTCH1;NOTCH3;NSD3;PARP1;PIK3C2B;PIK3CA;PIK3CB;PRKDC;PTPRD;PTPRZ1;RALGAPB;RB1;RBL2;RLF;ROBO1;RRM1;RTN4;SLU7;SMARCA1;SMARCA4;SRRM2;STAT3;TBC1D9;TIMELESS;TJP1;TOP2A;TTF1;UBA2;USP4;VPS13B;…		Malignant mesothelioma	4.84763e-06	65	ACACA;AGO2;AKT1;ANXA2;APC;AR;BMS1;BRCA1;BRD1;CCND1;CDH1;CDK2;CDK4;CDKN1A;COPG1;CREB1;CTNNB1;EGF;EGFR;EIF3A;EPHB2;ESR1;FN1;GLI2;GPC3;GSTP1;HDAC4;JAG1;JUN;LATS2;MAPK1;MDM2;MTMR4;MTOR;NBR1;NF2;NGF;NOTCH2;PARP1;PBRM1;PIK3CA;PIK3CB;PLK1;PLXNA1;PTCH1;PTEN;PTPRF;REV3L;RRM1;RXRA;SCAF11;SDC1;SETD2;SETDB1;SF3B1;SMAD2;SMARCA2;SPHK1;STAT3;TENM2;TIMP2;TP53;TXN;VIM;ZEB1
Fibrosarcoma	0.00540922	40	ABCA1;AKAP12;ATM;ATR;CAD;EPHB2;ERBB2;EWSR1;FBXW11;FLNA;FN1;FUS;GNAS;HIF1A;HK1;HSPA4;HSPD1;HSPG2;IGF1R;JAK1;KIF5B;KMT2A;LRP6;MAP3K1;MIB1;MKI67;MSH2;NES;NF1;ODC1;PIK3CA;PIK3CB;RIF1;ROCK1;SETD2;STAT1;TBC1D9;TYRO3;WDTC1;WNK1		Gastroesophageal reflux disease	4.94023e-06	44	APC;ATRX;BAG6;BRAF;CAV1;CCND1;CDC6;CHD7;CTBP1;EFNB2;EGF;EGFR;ELN;EZR;FASN;FLII;FLNA;FMR1;GSTP1;HRAS;HSPA4;IGF1R;KIF1A;LTBP4;MDM2;NES;NGF;NIPBL;NOS2;NSD2;ORC1;ORC4;PIK3CA;RAD21;RAI1;SALL1;SMC1A;SMC3;TECPR2;THBS1;TOP2B;TP53;TP53BP1;TSC2
Carcinoma, Transitional Cell	0.00541236	47	APAF1;ARID1A;ATR;BRCA1;CCAR2;CHD6;CREBBP;DNMT1;EIF3A;EP300;ERBB2;ESPL1;FGFR1;FN1;GLI2;GNAS;GSN;HDAC2;HIF1A;KMT2A;KMT2C;LZTS1;MAP1S;MCM2;MIB1;MKI67;MSH2;MSH6;MTOR;MTR;NCOR1;NOTCH1;NUMA1;PARP1;PIK3CA;PIK3CB;PIK3R1;PIKFYVE;PRRC2C;PTCH1;RSF1;SRRM2;STAG2;TBC1D9;TNKS;TSC2;XPO5		Obsessive compulsive behavior	5.05028e-06	18	ADNP;AFF2;BAZ1B;CHD7;CLIP2;CYFIP1;ELN;ESR1;FMR1;GTF2I;MED12;NIPBL;OCRL;RAD21;RFC2;SMC1A;SMC3;UBE3A
Class III malocclusion	0.00541236	18	APC2;ARHGAP21;CUL7;FBN1;FGFR1;FLII;HERC2;INSR;KDM5C;KIF11;LRP4;LRP5;NSD1;PTCH1;PTPN11;RAI1;SETD2;UBE3A		Frontal bossing	5.40449e-06	45	ANKRD11;APC2;BRAF;CBL;CREBBP;CUL7;EFNB1;EP300;FBN2;FGFR1;FLII;FLNA;FLNB;FMR1;GJA1;GLI3;HDAC4;HDAC6;HRAS;HSD17B4;INPPL1;LRP4;MED12;NSD2;OBSL1;OCRL;ORC1;PAFAH1B1;PEX5;PIK3CA;PIK3R1;PTCH1;PTEN;RAI1;ROR2;RUNX2;SEC23A;SEC24D;SETD2;STAT3;TRIM37;TTC37;VDR;WASHC5;YWHAE
Hematopoietic Neoplasms	0.00541236	27	ABL1;BCR;CHD8;CREBBP;CTNNA1;DICER1;EP300;EPHA3;EPHB2;FN1;HIP1;HTT;IGF1R;KDM1A;KDM2B;KMT2A;LONP1;NUP98;PIK3CA;PIK3CB;PTPN11;SF3B1;SMCHD1;STAT3;STAT5B;TBC1D9;TET1		PACHYONYCHIA CONGENITA 3	5.40449e-06	36	AKT1;AR;ATM;BRCA2;CD44;CDK2;CDKN1A;DCAF1;DNMT1;EGF;EPHB2;ERBB2;ESR1;GJA1;GLI2;HIF1A;HLA-C;HSPA4;LONP1;MAPK1;MCL1;MDM2;NCOR1;NPEPPS;NSD2;PLK1;PNP;PPARG;PTEN;RUNX2;SETD2;STAT3;TBC1D9;TP53;VDR;VIM
Inflammatory Breast Carcinoma	0.00541236	16	APC;ATAD2;BRCA1;BRCA2;CTNND1;EIF4G1;ERBB2;FGFR1;HDAC6;KIAA0100;NOTCH3;PIK3CA;PIK3CB;PTK2;PUM1;SMARCA4		Helicobacter pylori (H. pylori) infection in conditions classified elsewhere and of unspecified site	5.48762e-06	55	AKT1;APC;APEX1;CAD;CALR;CAV1;CCND1;CD44;CDH1;CTCF;CTTN;EGF;EGFR;EPHB2;ERBB2;GJA1;GLI3;HIF1A;HLA-C;HSP90AA1;HSPA4;HSPD1;IGF2R;JAG1;JAK2;JUN;LONP1;MAPK1;MAPK14;MCL1;MDM2;MIB1;MKI67;MLH1;MYC;NCAM1;NCL;NOS2;ODC1;PARP1;PPARG;PRDX1;PTPN11;PXN;RAC1;SETD2;SHH;SMARCD1;STAT3;TBC1D9;TP53;VDR;WDHD1;WDTC1;ZEB1
Atypical teratoid/rhabdoid tumor	0.00555271	11	ACACA;ATM;BMS1;EWSR1;FBXW11;IGF1R;INSR;NF2;PIK3CA;PIK3CB;SMARCA4		Melanocytic nevus	5.55382e-06	48	AKT1;BRAF;CCND1;CDK4;CDKN1A;CREBBP;DICER1;EGF;EGFR;EIF4E;EPHB2;ERBB2;GPC3;HDAC1;HIF1A;HRAS;HSP90AA1;HSPA8;IGF1R;KDM5B;LEMD3;LRP2;MAP2;MAPK1;MCM3AP;MDM2;MIB1;MKI67;MSH2;MYC;NF1;NME1;NOS2;PARP1;PCNA;PIK3CA;PLXND1;PPARG;PTCH1;PTEN;PTPN11;RAC1;RBM28;SEC23B;SMARCAL1;TP53;TRIM37;VCAN
Dental Enamel Hypoplasia	0.00555271	11	ATR;CREBBP;EP300;FLNB;GNAS;LONP1;NF1;OCRL;PCNT;PEX1;PLEC		Neuroendocrine Tumors	5.62846e-06	56	ACTN4;AKT1;APC;ARID1A;ATM;ATRX;BRAF;CALR;CCND1;CD44;CDK4;CREB1;CTNNB1;DAXX;DNMT1;EGF;EGFR;EPHB2;ERBB2;ESR1;FLII;FLNA;GNAS;GSN;HIF1A;HMGA1;HRAS;HSP90AA1;HSPA4;IGF1R;KIF11;MAP2;MAPK1;MIB1;MKI67;MLH1;MTOR;MYC;NCAM1;NEFM;NGF;NOTCH1;NOTCH3;ODC1;PAK1;PALB2;PCNA;PIK3CA;PIK3CB;PLCB3;PTEN;PTPRZ1;SMAD4;TP53;VCL;VHL
Small hand	0.00555271	11	ADNP;CENPE;CTNND2;CUL4B;FBN1;FGD1;HERC2;NIPBL;ORC1;RAD21;SMC3		Acquired flat foot	5.62846e-06	28	ALMS1;ATP7A;ATR;ATRX;BAZ1B;BCR;CLIP2;CREBBP;CTSC;CUL4B;CUL7;ELN;EP300;FBN1;FLII;FLNA;FLNB;FMR1;GTF2I;HSPG2;MAPK1;PACS1;RAI1;RFC2;SALL1;SBF1;SEC23A;SMAD3
Mucoepidermoid Carcinoma	0.00590899	14	APC;ATM;CENPF;CTNNAL1;CTNNB1;DICER1;DNMT1;EPHB2;ERBB2;EWSR1;MSH3;MTOR;NUMA1;STAT3		Flatfoot	5.62846e-06	28	ALMS1;ATP7A;ATR;ATRX;BAZ1B;BCR;CLIP2;CREBBP;CTSC;CUL4B;CUL7;ELN;EP300;FBN1;FLII;FLNA;FLNB;FMR1;GTF2I;HSPG2;MAPK1;PACS1;RAI1;RFC2;SALL1;SBF1;SEC23A;SMAD3
Triangular face	0.00590899	14	ANKRD11;BUB1;CUL7;JAG1;KAT6B;NOTCH2;OBSL1;PIK3R1;PTPN11;RAI1;SEC24D;SOS1;SOS2;TRIM37		Gastric Adenocarcinoma	6.0596e-06	59	AKT1;AP2A1;APC;APEX1;ARID1A;BIRC5;CALM1;CALM2;CALM3;CCNB1;CCND1;CD44;CDK2;CDKN1A;CREB1;DHX58;DICER1;EGF;EGFR;ERBB2;ESR1;FGFR1;GNAS;GNL3;HDAC9;HIF1A;HLA-A;HNRNPA2B1;HSPA4;HSPD1;IGF1R;JAG1;MAP6;MCL1;MTOR;MYC;NBAS;NME1;NOS2;NOTCH1;NOTCH2;PCNA;PHGDH;PIK3CA;PLCG1;PLK1;PPARG;PROM1;PTEN;PTPRD;RAN;SMAD2;SP1;STAT1;STAT3;TIMP2;TOP2A;TP53;WDHD1
Hip Dislocation, Congenital	0.0059522	13	AP3B1;ATR;CENPE;FBN1;FLNA;HSPG2;IARS2;KAT6B;KMT2D;LONP1;NIN;PCNT;PPP2R5D		Angle class 2 malocclusion	6.06103e-06	23	ATR;BAZ1B;BCOR;BRAF;CLIP2;CREBBP;DCHS1;ELN;EP300;FLNA;GJA1;GLI2;GPC3;GRIP1;GTF2I;LRP5;NOTCH2;PIK3R1;PTCH1;PTPN11;RFC2;SMAD3;SOS1
Narrow face	0.0059522	13	ATP7A;ATR;BAZ1B;BCOR;BLM;CENPE;CHD7;CLIP2;FBN1;GTF2I;MED12;PCNT;SIN3A		Angle class 3 malocclusion	6.06103e-06	23	ATR;BAZ1B;BCOR;BRAF;CLIP2;CREBBP;DCHS1;ELN;EP300;FLNA;GJA1;GLI2;GPC3;GRIP1;GTF2I;LRP5;NOTCH2;PIK3R1;PTCH1;PTPN11;RFC2;SMAD3;SOS1
Thin face	0.0059522	13	ATP7A;ATR;BAZ1B;BCOR;BLM;CENPE;CHD7;CLIP2;FBN1;GTF2I;MED12;PCNT;SIN3A		Enamel abnormalities	6.29244e-06	16	ATR;BAZ1B;CENPE;CLIP2;CUL7;DSP;ELN;GJA1;GTF2I;HRAS;LONP1;OBSL1;PCNT;RFC2;RUNX2;SEC24D
Range of joint movement increased	0.00626442	10	CUL7;FBN1;FLNA;KMT2D;LRP5;MED12;NOTCH3;OCRL;PPP2R1A;STAT3		Recurrent tumor	6.40817e-06	67	AKT1;APC;AR;ATM;BRAF;BRCA1;BRCA2;CAV1;CD44;CDK2;CENPE;CPSF2;DOCK11;EGF;EGFR;ERBB2;ESR1;FANCD2;GPX1;HDAC1;HDAC3;HK1;HLA-A;HNRNPA1;HRAS;HSPA9;IGF1R;INTS2;KIF3C;LPCAT1;LZTS1;MAPK8;MCM2;MIB1;MKI67;MLH1;MSH2;MSH6;MTOR;MYC;NCAPD3;NCOR2;NES;NME1;NPM1;ODC1;PARP1;PEG10;PI4KA;PIK3CA;PIK3CB;PLS3;POLD1;PROM1;PTCH1;PTEN;RELA;SALL4;STAT3;THBS1;TP53;TTF1;VCP;WNK1;XRCC5;XRCC6;ZEB1
Attention deficit hyperactivity disorder	0.006431	48	ADGRL3;ARVCF;BAZ1B;CHD7;CLIP2;CREBBP;CTNNA2;DHTKD1;DOCK3;ELFN1;ERBB2;FGD1;FLII;FLNC;FN1;GIT1;GTF2I;HDAC5;HERC2;HK1;IPO11;KALRN;LAMB2;MAP1B;MED12;MSH2;MSH6;NF1;NF2;NIPBL;NOS2;NSD1;OCRL;PER1;PIK3CA;PIK3CB;PTPRD;RAD21;RAI1;SEC24C;SIN3A;SLC12A6;SMC3;TSC2;UBE3A;VPS13A;VWA8;ZMYM2		Adenocarcinoma, Clear Cell	6.45601e-06	33	ACTN4;AKT1;ARID1A;BARD1;BRAF;BRCA2;CAPN1;CREB1;CTNNB1;EGF;EGFR;ERBB2;EWSR1;GPC3;HIF1A;KDM5C;MDM2;MLH1;MSH2;MTOR;NBR1;PIK3CA;PIK3CB;PPP2R1A;PTEN;RRM1;SDC1;SETD2;SP1;TP53;VCAN;VHL;ZNF217
Enlarged thorax	0.00644981	7	CUL7;FBN1;KAT6B;OBSL1;PTPN11;SOS1;SOS2		Posteriorly rotated ear	6.62054e-06	24	AP3B1;ATRX;BCOR;BRAF;BUB1B;CBL;CPT2;FLNA;GLI3;HRAS;HSPG2;KAT6A;KMT2D;LRP2;NF1;NOTCH3;PEX1;PTPN11;RAB3GAP2;RBM10;ROR2;RPS28;SF3B4;SNRPB
Urgency of micturition	0.00644981	7	HSPD1;KIF5A;SACS;SPAST;WASHC5;ZFYVE26;ZNF521		Rhabdoid Tumor	6.62054e-06	24	BCR;CCND1;CDK4;CDKN1A;EGFR;GPC3;KRT8;MDM2;MIB1;MKI67;MYC;NSF;PCNA;PHF5A;PIK3CA;PIK3CB;PLK1;PROM1;SMARCA1;SMARCA2;SMARCA4;TAGLN;TP53;VIM
Bulging forehead	0.00661383	15	ADNP;APC2;CPT2;DYNC1H1;FLNA;FLNB;IARS2;LRP4;LRPPRC;MED12;PIK3R1;SETD2;STAT3;TTC37;USP9X		Giant Cell Tumor of Bone	6.73666e-06	19	ANXA2;AR;CCND1;EGF;EGFR;ESR1;EWSR1;GJA1;GPX1;H3F3A;H3F3B;HIF1A;HLA-C;MYC;NR3C1;PCNA;RUNX2;TP53;VDR
Prominent forehead	0.00661383	15	ADNP;APC2;CPT2;DYNC1H1;FLNA;FLNB;IARS2;LRP4;LRPPRC;MED12;PIK3R1;SETD2;STAT3;TTC37;USP9X		Neurilemmoma	7.17384e-06	38	AKT1;BRAF;CCND1;CD44;CREB1;CTTN;EGF;EGFR;ERBB2;EWSR1;EZR;GSTP1;HSPA4;IGF1R;LATS2;MDM2;MIB1;MKI67;MSH4;MTOR;NES;NF1;NF2;NGF;PAK1;PIK3CA;PIK3CB;PKD1;PTEN;PTK2;RAC1;SHH;SRSF5;STAT3;STAT5B;TP53;TYRO3;VCAN
Aplasia Cutis Congenita	0.00669425	26	ACACA;AMER1;APC;ATM;BMS1;BRCA1;CAD;CREBBP;CTNNB1;DICER1;ERBB2;IGF1R;JAG1;LONP1;MMRN1;MTOR;NOTCH1;NUMA1;PIK3CA;PIK3CB;PLEC;RRM1;SPEN;STAT3;TOP2A;VCAN		Colon diverticulum anatomic structure	7.17384e-06	11	AKT1;BAZ1B;CLIP2;ELN;GTF2I;MLH1;MSH2;PIK3CA;PKD1;PTEN;RFC2
Synophrys	0.00682411	11	COL4A3BP;CUL4B;FGFR1;FLII;KMT2A;NIPBL;NOTCH2;PACS1;RAD21;RAI1;SMC3		Diverticular disease of colon	7.17384e-06	11	AKT1;BAZ1B;CLIP2;ELN;GTF2I;MLH1;MSH2;PIK3CA;PKD1;PTEN;RFC2
Adenocarcinoma of lung (disorder)	0.00682411	93	ABCA3;ABL1;ACLY;ACTN4;APC2;ARHGAP35;ARID1A;ASPM;ATAD2;ATM;ATP2C1;CCAR2;CDH2;CREBBP;CRMP1;CTNNB1;CTNND1;CTNND2;DDR1;DICER1;DROSHA;EIF3A;EIF4G2;EML4;EP300;EPHB2;ERBB2;FBXW11;FGFR1;FN1;GEMIN4;GNAS;GSN;HDAC2;HIF1A;HIP1;HSPA4;IGF1R;IMMT;INSR;IQSEC1;KIDINS220;KIF14;KIF5B;LAMA1;LATS2;LMTK2;LRP1;MED1;MFN2;MSH2;MSH3;MSH6;MTOR;NBR1;NCOA3;NOTCH1;NOTCH2;NOTCH3;NSD1;PARG;PARP1;PCNT;PIK3CA;PIK3CB;PSMD2;PTK2;PT…		Papillary thyroid carcinoma	7.28417e-06	87	ABL1;AKT1;APC;ATM;AURKB;BRAF;BRCA1;BTRC;CALM1;CALM2;CALM3;CCND1;CD44;CDH1;CDKN1A;CHEK1;CKS2;CPSF2;CTNNB1;DICER1;DNMT1;EGF;EGFR;EML4;EPHB2;ERC1;ESR1;FASN;FN1;GAS1;GOLGA5;HDAC4;HIF1A;HLA-A;HLA-C;HMGB2;HRAS;HSP90AA1;IGF1R;INSR;IQGAP1;JAG1;KAT5;KIDINS220;MAPK1;MCL1;MDM2;MLH1;MMRN1;MTOR;MYC;NCAM1;NCL;NGF;NOS2;NOTCH1;NOTCH3;NPC2;PCM1;PCNA;PIK3CA;PIK3CB;PJA2;PPARG;PRPF31;PTCH1;PTEN;RACK1;RELA;RUNX2;SETD…
Muscular Dystrophy, Emery-Dreifuss	0.00692599	8	FLNA;FLNB;FLNC;GOLGB1;LEMD3;SREBF1;SYNE1;SYNE2		Isolated cases	7.30669e-06	26	AKT1;CHD7;CREBBP;CTBP1;EP300;FGFR1;FLNB;GLI2;GNAS;HERC2;HRAS;JAK2;LEMD3;MYC;NIPBL;NME1;NSD2;PAFAH1B1;PIK3CA;RAI1;RB1;RPS14;SIN3A;UBE3A;VHL;ZBTB20
Medulloblastoma	0.00704015	67	AKAP12;APC;ASPM;BCR;BRCA2;CIC;CREBBP;CRMP1;CTNNB1;DDX42;DDX46;DHX16;DICER1;DIS3L;DNMT1;EHMT1;EPHA3;EPHA7;EPHB2;ERBB2;FBN2;GCN1;GLI2;GLI3;GNAS;GSN;HDAC5;HIF1A;IGF1R;IRS2;KAT6A;KDM4B;KIF14;KIF1B;KMT2C;KMT2D;LRPPRC;MAP2;MCM2;MCM4;MED1;MSH2;MSH6;MTOR;NES;NOTCH1;NOTCH2;PARP1;PIK3CA;PIK3CB;PLEC;POLD1;PRKDC;PTCH1;RICTOR;ROBO1;ROR2;SRRM2;STAT3;TBC1D9;TNKS;TSC2;VCAN;WDTC1;WNK1;ZMYM3;ZNF521		Myelodysplasia	7.4901e-06	28	APAF1;ASXL1;ATRX;BCOR;BCORL1;BCR;DICER1;DLL1;DNMT1;DROSHA;HRAS;IRS2;JAK2;KMT2A;MCM3AP;MSH2;NCAM1;NPM1;NUP214;PAFAH1B1;POMP;SF3B1;SIN3A;SRP72;SRSF2;TBC1D9;TP53;YWHAE
Knee joint valgus deformity	0.00704015	13	ATP7A;ATRX;BAZ1B;CLIP2;FLNA;GTF2I;HSPG2;IARS2;LONP1;MEGF8;NOTCH2;OCRL;ORC1		Anteverted nostril	7.63308e-06	51	ANKRD11;APC2;ATRX;BRAF;BUB1B;COL4A3BP;CUL7;EFTUD2;FBN1;FGD1;FGFR1;FIG4;FLII;GLI3;GPC3;HDAC4;HRAS;IFT140;IFT172;INPPL1;KIF11;KIF1A;LONP1;LRPPRC;MEGF8;NIPBL;NOTCH2;OBSL1;PAFAH1B1;PEX1;PEX5;PPP2R1A;PROM1;PRPF31;PRPF4;PRPF6;PRPF8;RAB3GAP2;RAD21;RAI1;RBM10;ROR2;SEC23A;SETD2;SIN3A;SMARCA2;SMC1A;SMC3;SNRNP200;TTC37;YWHAE
Peutz-Jeghers Syndrome	0.00704015	13	APC;BRCA1;BRCA2;BUB1;CTNNB1;FNDC3A;MARK4;MSH6;MTOR;ODC1;PPFIA1;SMARCA4;TSC2		Gastrointestinal Carcinoid Tumor	7.83632e-06	48	AKT1;APAF1;APC;APEX1;ATF7IP;BRAF;BRCA1;BRCA2;CALM1;CALM2;CALM3;CASP8AP2;CDH2;CDK2;CTCF;CTNNB1;EGF;EGFR;EIF4B;ERBB2;ESR1;EWSR1;GSTP1;KRT8;MDM2;MIB1;MKI67;MLH1;MSH2;MSH6;MTOR;NOTCH1;PCNA;PIK3CA;PIK3CB;POLD1;PPARG;PTEN;PTPN11;RAC1;RB1;RPS6KB1;RUNX2;SMAD3;STAT1;TP53;VCP;ZNF687
melanoma	0.00708471	215	ABCA1;ACO1;ACTN4;ADAR;AP2A1;AP3B1;APAF1;APC;ARHGAP35;ARHGEF17;ARHGEF2;ARID2;ASAP1;ATM;ATP2C1;ATP7A;ATR;ATRX;BCAR1;BCR;BIRC6;BLM;BPTF;BRCA1;BRCA2;CAPN1;CCDC88A;CDH2;CENPE;CEP350;COL4A2;CREBBP;CRMP1;CSE1L;CTNNAL1;CTNNB1;CTNND1;CUL1;CUL3;DAXX;DDR1;DDX46;DHX16;DIAPH1;DICER1;DNMT1;DOCK3;DSP;DST;EEF2;EIF2AK4;EIF4G2;EP300;EPB41;EPHA3;EPHB2;ERBB2;EWSR1;FASN;FAT1;FAT4;FBXO18;FBXW11;FGFR1;FLNA;FLNB;FN1;GAS…		Adenoma	1.07161e-05	155	ACACA;AKT1;APAF1;APC;APC2;APEX1;AR;ATM;ATP1A1;ATP5B;AURKA;BCAR1;BCL9;BIRC5;BLM;BMS1;BRAF;BRCA1;BUB1;BUB1B;CALM1;CALM2;CALM3;CALR;CAV1;CCNB1;CCND1;CD44;CDH1;CDK2;CDK4;CDKN1A;CKAP2;CREB1;CSE1L;CTBP1;CTNNB1;CTNND1;DCLK1;DICER1;DIS3;DROSHA;EGF;EGFR;EIF4E;ENC1;EPHB2;ERBB2;ESR1;FASN;FBN2;FN1;FYN;GJA1;GNAS;GPC3;GPX1;GSK3B;GSN;GSTP1;HDAC2;HDAC3;HIF1A;HLTF;HMGA1;HRAS;HSPA4;IGF1R;IGF2R;INSR;INTS2;IRS1;JAG1…
Luminal B Breast Carcinoma	0.00708471	16	BRCA1;BRCA2;ERBB2;ESPL1;FGFR1;IGF1R;KAT6A;PIK3CA;PIK3CB;PPP4R1;RASAL2;RB1;RICTOR;STAT3;TOP2A;UTRN		Animal Mammary Neoplasms	1.0946e-05	47	ACTG1;ACTN4;AKT1;ANXA2;APC;AR;ATM;BRCA1;BRCA2;CASK;CCND1;CDC42;CDH1;CDK4;CNN3;DNMT1;EEF1A1;EGFR;ERBB2;ESR1;EZR;FN1;GSTP1;H3F3B;HNRNPA1;HRAS;IGF1R;IGF2R;MAP3K1;MDM2;PHB;PIK3CA;PIK3R1;PLK2;PSMA4;PTBP1;RAN;RASA1;RB1;RPL6;RPS14;SNRPD3;SRSF2;STAT3;TP53;UBE2I;VDR
Microstomia	0.00708471	16	CHD7;CREBBP;EP300;FBN1;FLNA;HSPG2;IARS2;MED12;NOTCH2;ORC1;PIK3CA;POLD1;PTCH1;SIN3A;TTC37;ZBTB16		Ductal Carcinoma	1.10331e-05	51	AKT1;AR;ARID1A;BCAR1;BRCA1;BRCA2;BRD8;CALM1;CALM2;CALM3;CAV1;CCND1;CD44;CDH1;CDH2;CREBBP;CTCF;CTNND1;DNMT1;EGFR;EIF4E;ERBB2;ESR1;FN1;HIF1A;HMGA1;HNRNPU;HRAS;IQSEC1;KIAA0100;KIF14;KRT8;MAPK8;MYC;NCL;NCOA3;NCOR1;NRDC;PARK7;PCNA;PEG10;PIK3CA;PTCH1;PTEN;PTPN11;RASA1;SMAD4;SRC;STAT3;TP53;YBX1
Cutaneous finger syndactyly	0.00734763	5	DCHS1;GRIP1;LRP4;MEGF8;ORC1		Kaposi Sarcoma	1.14896e-05	62	ABCA1;AKT1;ANXA2;AR;ATM;BCR;BRAF;BUB1;CCND1;CDKN1A;CLIP2;CREB1;CSNK2A1;CTCF;CTNNB1;DDR1;EFNB2;EIF2AK2;EIF4E;EPHB2;FGFR1;H2AFX;HIF1A;HLA-A;HLA-C;HSP90AA1;HSPA4;IGF1R;IGF2R;INSR;INTS2;JAG1;LRP1;LRPPRC;MAP4K4;MAPK1;MAPK8;MDM2;MKI67;MYC;NME1;NPM1;NR3C1;PCNA;PIK3CA;PIK3CB;PTK2;RAC1;RPS6KB1;SDC1;SERPINH1;SKP2;SLK;SSRP1;STAT3;SUGP1;THBS1;TP53;TRIM28;TSC2;USP7;VDR
Impulsive Behavior	0.00734763	5	AFF2;CREBBP;DNMT1;EP300;GLDC		Costello syndrome (disorder)	1.20025e-05	15	AKT1;BRAF;CD44;CDK4;EGF;ELN;EPHB2;HRAS;MAPK1;PIK3CA;PIK3CB;PTPN11;RASA1;TP53;VCAN
Shawl scrotum	0.00734763	5	ATRX;CREBBP;EP300;FGD1;ORC1		Defective tooth enamel	1.20025e-05	15	ATR;BAZ1B;CENPE;CLIP2;CUL7;ELN;GJA1;GTF2I;HRAS;LONP1;OBSL1;PCNT;RFC2;RUNX2;SEC24D
BREAST CANCER 3	0.00734763	6	BRCA1;BRCA2;ERBB2;HIF1A;PIK3CA;RAD21		Dystrophic tooth enamel	1.20025e-05	15	ATR;BAZ1B;CENPE;CLIP2;CUL7;ELN;GJA1;GTF2I;HRAS;LONP1;OBSL1;PCNT;RFC2;RUNX2;SEC24D
Decreased lower limb vibratory sense	0.00734763	6	HSPD1;KIF5A;SACS;SPAST;VCP;WASHC5		Absent auditory canals	1.20025e-05	13	DCHS1;EFTUD2;GLI3;GRIP1;NIPBL;ORC1;RAD21;RPL26;SF3B4;SMC1A;SMC3;SNRPB;TSHZ1
Small labia majora	0.00734763	6	NIPBL;ORC1;RAB3GAP2;RAD21;ROR2;SMC3		Absent external auditory canals	1.20025e-05	13	DCHS1;EFTUD2;GLI3;GRIP1;NIPBL;ORC1;RAD21;RPL26;SF3B4;SMC1A;SMC3;SNRPB;TSHZ1
Generalized hirsutism	0.00766298	10	ARID1A;GNAS;HSPG2;INSR;NIPBL;NOTCH2;RAB3GAP2;RAD21;SMARCA4;SMC3		Atresia of the external auditory canal	1.20025e-05	13	DCHS1;EFTUD2;GLI3;GRIP1;NIPBL;ORC1;RAD21;RPL26;SF3B4;SMC1A;SMC3;SNRPB;TSHZ1
Mammary Tumorigenesis	0.0079427	26	APC;ARHGEF2;BRCA1;BRCA2;CTNNB1;DNMT1;ERBB2;FGFR1;INTS1;INTS2;IQGAP1;IRS2;MCM3AP;MMRN1;MTOR;NCOA3;NOTCH1;PALB2;PARP1;PIK3CA;PIK3CB;PREX1;RB1;STAT3;TIAM1;UBE3A		Atretic auditory canal	1.20025e-05	13	DCHS1;EFTUD2;GLI3;GRIP1;NIPBL;ORC1;RAD21;RPL26;SF3B4;SMC1A;SMC3;SNRPB;TSHZ1
Hyperreflexia	0.00810777	34	ATP13A2;ATRX;BAZ1B;CASK;CCDC88A;CLIP2;CREBBP;DNMT1;EP300;FUS;GLDC;GTF2I;HSPD1;HTT;KDM5C;KIF1A;KIF1C;KIF5A;NDUFS1;OPA1;PEX1;PEX5;PNPLA6;POLR3A;POLR3B;RARS;SACS;SETX;SPAST;SPTAN1;SPTBN2;UBE3A;WASHC5;ZNF592		Sarcoma, Epithelioid	1.24736e-05	14	ARID1A;CCND1;CIC;EGFR;EWSR1;FN1;GPC3;HDAC9;MIB1;MKI67;PTEN;SMARCA1;TP53;VIM
Protruding ears	0.00828467	13	ANKRD11;BAZ1B;BLM;CLIP2;CUL7;FGFR1;GTF2I;KIF11;KMT2D;OBSL1;OCRL;PTPN11;RB1		Penile hypospadias	1.24736e-05	39	AR;ATR;ATRX;BCOR;BUB1B;CD44;CREBBP;CUL4B;CUL7;DCHS1;DKC1;DOCK11;EFNB1;EP300;ESR1;FGFR1;FIG4;FLNA;GPC3;GRIP1;MAP3K1;MED12;NIPBL;NOTCH2;NSD2;PCNT;PEX1;PEX5;POLA1;PTPN11;RAD21;RPL35A;SALL1;SHH;SIN3A;SMC1A;SMC3;UBA1;WASHC5
Adenocarcinoma of rectum	0.0085115	9	ABCC4;APC;FN1;HIF1A;MIB1;MKI67;MSH2;SETD2;TP53BP1		Phyllodes Tumor	1.28203e-05	20	AR;CCND1;EGFR;ERBB2;ESR1;FLNA;HIF1A;IGF1R;KMT2D;MED12;MLH1;MTOR;MYC;NR3C1;PIK3CA;PIK3CB;RARA;SCAF11;SETD2;TP53
Anthrax disease	0.0085115	9	EPHB2;ERBB2;HIF1A;IMMT;KIF1C;LRP5;LRP6;PARP1;WDTC1		Lymphoma, Non-Hodgkin	1.31678e-05	109	AKT1;AR;ASXL1;ATM;AURKA;BCR;BIRC5;BLM;BRAF;BRCA1;BRCA2;CALM1;CALM2;CALM3;CASP8AP2;CCAR1;CCND1;CD44;CDC6;CDK2;CDK4;CDKN1A;CHEK1;CREB1;CRK;DLL1;EEF2;EIF4A2;EIF4E;EIF4G1;EPHB2;ERBB2;ESR1;FGFR1;FN1;GPX1;GSTP1;H2AFX;HDAC6;HDAC9;HIF1A;HLA-A;HLA-C;HRAS;HSPA4;HSPH1;IGF1R;IGF2R;INSR;KMT2A;KMT2D;LEF1;LIG3;MAPK1;MAPK14;MAPK8;MCL1;MDM2;MIB1;MKI67;MSH2;MSH6;MTHFD1;MTR;MUM1;MYC;NCAM1;NCOA3;NCOR2;NGF;NME1;NOS2;…
Gingivitis	0.0085115	9	ACACA;ALMS1;ATM;BMS1;HSPD1;LYST;NOS2;SMC3;STAT3		Joint hyperflexibility	1.34845e-05	28	ARID1A;ATP7A;ATR;BRAF;CENPE;CUL7;EFNB1;ELN;FGD1;FLNB;HDAC4;HRAS;KAT6B;KMT2D;LONP1;MED12;NOTCH2;OBSL1;OCRL;PCNT;PIK3CA;PTCH1;PTPN11;SIN3A;SMARCA4;SOS1;SOS2;STAT3
High, narrow palate	0.0085115	9	BCOR;FBN1;INSR;KDM5C;NIPBL;PEX1;PTPN11;SIN3A;WASHC5		Amyotrophic Lateral Sclerosis	1.34845e-05	125	ABCA1;ABL1;ADAR;AKT1;ALS2;AMPH;APAF1;APEX1;AR;ASPM;ATP7A;BRCA1;CABIN1;CAPN1;CAV1;CCDC88A;CDC7;CDK2;CDK5;CELSR3;CHAF1A;CLIP2;CNR1;COL4A2;CREBBP;CTR9;DCTN1;DDX46;DHX16;DNMT1;EGF;EGFR;EIF2AK2;EIF4G2;EPHA3;EWSR1;EXOC4;FIG4;FMR1;FNDC3A;FUS;GARS;GEMIN4;GLI3;GRIA2;GSTP1;HDAC2;HDAC4;HDAC6;HECW1;HIF1A;HNRNPA1;HNRNPA2B1;HNRNPC;HNRNPK;HSPA4;HTT;KIF1B;KIFAP3;LAMC1;LSM2;MAP1B;MAPK14;MAPK8;MDH1;MFN2;MTOR;MYO6;…
Autistic Disorder	0.00920024	84	ACACA;ADNP;AFF2;AGAP1;AGRN;ANK3;ANKRD11;APC;ARHGAP32;ARHGEF2;ARID1B;ATRX;BAZ1B;BMS1;CACNA1H;CASK;CHD7;CHD8;CLIP2;CMAS;CREBBP;CSDE1;CTNNB1;CTNND2;CUL7;CYFIP1;DOCK11;EIF3A;EP300;EPHB2;FXR1;FXR2;GRIP1;GTF2I;HDLBP;HIP1;HSD17B4;HTT;JMJD1C;KDM5C;LRP2;MAGED1;MAP2;MAPK8IP2;MED12;MPDZ;MTHFD1;MTOR;MTR;NBEA;NF1;NOS2;NOTCH1;NSD1;NSD3;PASK;PER1;PIK3CA;PIK3CB;POLG;PPP2R5D;PREX1;PTK2;PTPRZ1;RAI1;RFC1;RNF216;ROB…		Ductal Breast Carcinoma	1.3503e-05	25	BCAR1;BRD8;BUB1B;CCND1;CTNND1;EGFR;ERBB2;ESR1;GNAS;HIF1A;HMGA1;HNRNPU;HRAS;MMRN1;MSH6;NOTCH3;PCNA;PIK3CA;RASA1;RPA2;SMAD3;SMAD4;SRC;STAT3;TP53
Dilated ventricles (finding)	0.00970839	23	ANKRD11;APC2;COL4A2;CPT2;FIG4;FLII;HERC2;HSD17B4;KANK1;KIF1A;KMT2D;NSD2;OCRL;PIK3CA;PPP2R1A;PPP2R5D;PTCH1;RAI1;SETD2;SLC12A6;TRIM37;VPS13A;XPR1		Paroxysmal kinesigenic choreoathetosis	1.66188e-05	30	AKT1;CAV1;CCND1;CRK;EGF;EGFR;ERBB2;ESR1;FN1;GSN;HDAC9;HLA-C;HSPG2;JAK2;JUN;MAPK1;MAPK14;MTOR;PIK3CA;PIK3CB;PKD1;PPARG;PRKD1;PTEN;RACK1;RANBP2;RANGAP1;SPHK1;TSC2;USP7
Stereotyped Behavior	0.00984572	13	ADNP;ATM;BCR;COL4A3BP;CREBBP;EP300;FLII;NOTCH1;NSD2;OCRL;RAI1;SF3B1;VCP		FANCONI ANEMIA, COMPLEMENTATION GROUP D2	1.67995e-05	9	BRCA1;FANCD2;FANCI;PCNA;RAD51;REV3L;RPA2;USP1;WDR48
Stereotypic Movement Disorder	0.00984572	13	ADNP;ATM;BCR;COL4A3BP;CREBBP;EP300;FLII;NOTCH1;NSD2;OCRL;RAI1;SF3B1;VCP		Malignant neoplasm tonsil	1.67995e-05	9	CCNB1;CDH1;EGFR;HIF1A;PIK3CA;PIK3CB;PTEN;SKP1;TP53
Uranostaphyloschisis	0.00990309	32	ARVCF;ATR;C2CD3;CENPF;CHD7;EFTUD2;FAF1;FGD1;FGFR1;FLNA;FLNB;GAS1;GLI2;GRIP1;HSPG2;KMT2D;MED12;MN1;NIPBL;NSD2;ORC1;PDS5B;PEX5;PHGDH;POLR1A;PTCH1;PTPN11;RB1;RBM10;SEC24C;STAT3;WASHC5		Intestinal Neoplasms	1.70038e-05	40	AKT1;APC;BCL9;BLM;CCND1;CDC42;CDK2;CDK4;CDKN1A;CTNNB1;DCLK1;EGFR;EPHB2;ERBB2;HDAC2;HIF1A;HNRNPC;JAG1;LEF1;MAPK1;MLH1;MSH2;MSH3;MSH6;MYC;PHGDH;PIK3CA;PIK3CB;PPARG;PTBP1;ROBO1;SCN3A;SMC2;SMC3;SPHK1;SRRM2;TIAM1;TP53;VHL;ZEB1
Cystadenoma	0.0100108	11	APC;BRCA1;DOCK1;ERBB2;HIF1A;MIB1;MKI67;PARP1;PIK3CA;PIK3CB;TSC2		Hereditary Malignant Neoplasm	1.75895e-05	23	APC;AR;ATM;BARD1;BLM;BRAF;BRCA1;BRCA2;CDH1;ERBB2;MDM2;MLH1;MSH2;MSH6;MYC;NF2;PALB2;PTEN;RAD51;TOPBP1;TP53;VHL;WDTC1
ear infection chronic	0.0100108	11	ALMS1;ARVCF;BAZ1B;CLIP2;FLII;GTF2I;PIK3R1;RAI1;ROR2;SEC24C;STAT3		Carcinoma ex pleomorphic adenoma	1.82017e-05	11	AR;CCND1;EGFR;ERBB2;JAK2;MDM2;NCOA1;NCOR1;SRC;STAT3;TP53
Multiple, subcutaneous nodules	0.0100108	12	APC;CTNNB1;FUS;GNAS;INSR;LEMD3;NOTCH3;OCRL;PIK3CA;SALL1;SEC23B;TSC2		Liposarcoma, Dedifferentiated	1.84886e-05	16	ATRX;BRAF;CALR;CCND1;CDK4;DAXX;HDAC1;IGF1R;JUN;MDM2;NUP107;PLK1;PTEN;RB1;SDC1;TP53
Subcutaneous nodule	0.0100108	12	APC;CTNNB1;FUS;GNAS;INSR;LEMD3;NOTCH3;OCRL;PIK3CA;SALL1;SEC23B;TSC2		Unilateral Breast Carcinoma	1.87305e-05	7	ATM;BRCA1;BRCA2;ERBB2;PALB2;PLCG1;TP53
Mental Retardation, X-Linked	0.0100436	20	AFF2;ATR;ATRX;BRWD3;CASK;CHD3;CUL4B;FGD1;HCFC1;HUWE1;KDM5C;KIAA1109;MED12;OCRL;PJA1;SMARCA1;SMARCA4;WNK3;ZMYM2;ZMYM3		Renal carcinoma	2.02959e-05	84	AKT1;AMER1;ANXA2;APAF1;ARID1A;BIRC5;BRAF;CABIN1;CALM1;CALM2;CALM3;CAV1;CCND1;CD44;CDH1;CDK2;CDK4;CDKN1A;CLTC;CTNNB1;CUL1;DDR1;EGF;EGFR;EPHB2;ERBB2;FN1;GPC3;GSTP1;HIF1A;HLA-C;HSP90AA1;IGF1R;KANK1;KANK2;KDM5C;MALAT1;MAPK1;MAPK8;MCL1;MDM2;MLH1;MSH2;MSH3;MTOR;MYC;MYLK;NME1;NOS2;NR3C1;NUP214;PAK1;PBRM1;PCNA;PIK3CA;PIK3CB;PIK3R1;PKD1;PLK1;PPARG;PROM1;PTEN;PTPRU;RACK1;RARA;ROCK1;RPSA;SETD2;SMAD4;SMARCA1…
Triple Negative Breast Neoplasms	0.0100523	64	ABL1;ARID1A;ASPM;ATM;ATR;BCAR1;BRCA1;BRCA2;BRD7;CENPE;COL4A3BP;DDR1;DNMT1;DROSHA;EPHB2;ERBB2;FANCD2;FANCI;FASN;FGFR1;FLNA;FN1;GAS1;HIF1A;HSPA4;IGF1R;JAK1;KDM1A;KDM2B;KDM5B;KIAA0100;KIF14;LRP6;MAGI3;MED1;MTOR;NBR1;NES;NOS2;NOTCH1;NOTCH2;NUP214;PALB2;PARP1;PIK3CA;PIK3CB;PTPN11;PTPRF;RASAL2;RRM1;SETD2;SIN3A;SMARCA1;SMARCA4;SPAG5;SPAG9;SRRM2;STAT1;STAT3;TLN1;TOP2A;TP53BP1;WDTC1;ZEB1		Congenital contractural arachnodactyly	2.11142e-05	46	ACTN4;AKT1;ARID1A;ASXL1;BIRC5;CCNB1;CD44;CDH1;CDK4;DICER1;DNMT1;EGFR;ERBB2;FBN1;FBN2;FGFR1;GNAS;GPC3;HSP90AA1;KMT2C;MCL1;MCM3AP;NOTCH1;PAFAH1B1;PBRM1;PIK3CA;PIK3CB;PLK1;POLD1;PPIA;PRKAR2B;RELA;ROBO2;RPSA;SF3B1;SHH;SKP2;SMAD4;SPHK1;STAT3;TP53;VDR;VIM;WNK1;YWHAE;ZEB1
Lymph Node Tuberculosis	0.0100585	4	BCAR1;CSE1L;CTNND1;NCAPG2		High, narrow palate	2.11381e-05	15	BCOR;BRAF;DPM1;FBN1;GPC3;INSR;KDM5C;NIPBL;PCLO;PEX1;PTPN11;RUNX2;SIN3A;SMS;WASHC5
Prominent fingertip pads	0.0100585	4	CREBBP;EP300;KMT2D;MED12		Mesothelioma (malignant, clinical disorder) (disorder)	2.17733e-05	52	ACACA;AKT1;APC;AR;BMS1;BRCA1;BRD1;CCND1;CDH1;CDK2;CDK4;CDKN1A;CREB1;CTNNB1;EGF;EGFR;EIF3A;EPHB2;ESR1;GLI2;GPC3;GSTP1;JAG1;JUN;LATS2;MAPK1;MDM2;MTOR;NBR1;NF2;NGF;NOTCH2;PARP1;PBRM1;PIK3CA;PIK3CB;PLK1;PLXNA1;PTCH1;PTEN;REV3L;RRM1;SCAF11;SDC1;SMAD2;SPHK1;STAT3;TENM2;TIMP2;TP53;TXN;ZEB1
Thalidomide embryopathy syndrome	0.0100585	4	APC;BCOR;LRP4;SALL4		Endometrioid carcinoma ovary	2.23659e-05	12	ARID1A;CCND1;EGFR;ERBB2;MLH1;MSH2;MSH6;PIK3CA;PIK3CB;POLE;PTEN;TP53
Soft Tissue Neoplasms	0.0105983	16	APC;CIC;CTNNB1;ERBB2;EWSR1;FLII;FUS;GNAS;MED12;MIB1;MKI67;MSH2;NF1;RB1;STAT3;TBC1D9		Hereditary nonpolyposis colorectal carcinoma	2.31213e-05	14	AKT1;APC;ATM;BRAF;BUB1B;CTNNB1;EP300;MLH1;MSH2;MSH6;PIK3CA;RPS20;SRC;TP53
Therapy-related myelodysplastic syndrome	0.0107748	9	ASXL1;BCR;CREBBP;KAT6A;KAT6B;KMT2A;NUP98;PTPN11;SF3B1		Philadelphia chromosome positive chronic myelogenous leukemia	2.37949e-05	13	ABL1;ASXL1;BCR;DLL1;HRAS;NUP98;PAFAH1B1;RALGAPB;SF3B1;TBC1D9;TP53;YWHAE;YY1
Autosomal Dominant Disorder	0.0107748	22	APC;ATP2C1;BRCA1;BRCA2;CHD7;DCTN1;DSP;FBN1;FBN2;HTT;JAG1;MSH2;MSH6;MYH9;NF1;NOTCH3;PLEC;PTCH1;PTPN11;TSC2;VCP;WNK1		Persistent embryonic structure	2.45617e-05	147	AARS;ABCA1;ABL1;ACACA;ADGRL3;AKT1;APC;AR;ARFGEF2;ASCC3;ATF7IP;ATM;ATR;ATRX;BCR;BMS1;BRAF;BRCA1;CALR;CAV1;CCNB1;CCND1;CD44;CDC20;CDC42;CDH1;CDK2;CDK5;CDKN1A;CFTR;CHAF1A;CHEK1;CNR1;COL17A1;CREB1;CRK;CTNNB1;DHX58;DNMT1;DOCK11;EGF;EGFR;EIF3E;EIF4B;EPHB2;ERBB2;ESR1;FGFR1;FN1;GLDC;GNPTAB;GRIA2;H2AFX;HDAC2;HDAC9;HIF1A;HIST1H4A;HIST1H4B;HIST1H4C;HIST1H4D;HIST1H4E;HIST1H4H;HIST1H4I;HIST1H4K;HLA-A;HLA-C;HR…
Hematologic Neoplasms	0.010842	57	ABCA1;ABL1;APAF1;APC;ASXL1;ATM;ATRX;BCR;BLM;BRCA1;BRCA2;CREBBP;EML4;EP300;ERBB2;FANCD2;FGFR1;HSPA4;JAK1;KIF11;KMT2A;KMT2B;KMT2C;KMT2D;LIG3;LRP1;MAPK8IP2;MFHAS1;MSH2;MSH6;MTOR;NCOR1;NOS2;NOTCH1;NRIP1;NSD3;NUP214;NUP98;PCM1;PIK3CA;PIK3CB;POLD1;POLE;PRDM16;PTPN11;RB1;RFC1;ROCK1;ROR2;SF3B1;SLU7;STAT3;STAT5B;TBC1D9;TOP2A;URI1;ZMYM2		Alveolar rhabdomyosarcoma	2.45617e-05	23	AP2B1;APEX1;CAV1;CDK4;CNR1;EGFR;EPHB2;ERBB2;EWSR1;FGFR1;IGF1R;KIDINS220;MAPK1;MAPK8;MDM2;MYC;NCAM1;NCOA1;NCOA2;PLK1;RAC1;RB1;TP53
INCLUSION BODY MYOPATHY WITH EARLY-ONSET PAGET DISEASE AND FRONTOTEMPORAL DEMENTIA	0.010842	6	EIF4G2;GEMIN4;NF1;PSMD2;VCP;WDTC1		Mammary Ductal Carcinoma	2.45768e-05	19	BCAR1;BUB1B;CAV1;CD44;CSE1L;CTNND1;ELN;ERBB2;ESR1;HIF1A;MIB1;MKI67;MMRN1;NOTCH3;RPA2;SMAD4;THBS1;TP53;UBR5
Mixed phenotype acute leukemia	0.010842	6	ABL1;BCR;EP300;KAT6A;KMT2A;NCOA2		Long eyelashes	2.50501e-05	17	ARID1A;CLP1;CREBBP;EGFR;EP300;FBN1;KMT2D;NIPBL;NOTCH2;ORC1;PACS1;PNPLA6;RAD21;ROR2;SMARCA4;SMC1A;SMC3
Urgency frequency syndrome	0.010842	6	HSPD1;KIF5A;SACS;SPAST;WASHC5;ZFYVE26		Gastrointestinal Stromal Tumors	2.65339e-05	62	ABCA1;ABL1;AKT1;AMPH;APC;ARID1A;AURKA;BCR;BRAF;CBL;CCNB1;CCND1;CD44;CDH1;CDK2;CDK4;CDKN1A;CMAS;DAAM1;DIAPH1;EGFR;EPHB2;ERBB2;EZR;FASN;FGFR1;FYN;GJA1;H2AFX;HIF1A;HSP90AA1;IGF1R;INSR;MAPK1;MAPK14;MAPK8IP2;MDM2;MIB1;MKI67;MLH1;MTOR;NCOR1;NES;NF1;NF2;OBSCN;PCNA;PIK3CA;PIK3CB;PROM1;PTBP1;PTEN;RAD51;RARA;ROR2;SHH;SKP2;SRC;SRRM2;TP53;VCAN;VHL
Adenocarcinoma, Clear Cell	0.0111171	19	ACTN4;ARID1A;BRCA2;CAPN1;CTNNB1;ERBB2;EWSR1;HIF1A;KDM5C;MSH2;MTOR;NBR1;PIK3CA;PIK3CB;PPP2R1A;RRM1;SETD2;VCAN;ZNF217		Developmental Disabilities	2.72618e-05	41	ASXL1;ATP2C1;ATRX;CBL;CHD7;CREBBP;CYFIP1;EGFR;EHMT1;EIF2S2;EIF4E;ELN;EPHB2;FGD1;FMR1;GLI3;GNAS;HRAS;JAG1;KAT6B;LRP2;MAPK1;NF1;NIPBL;NOTCH1;NOTCH3;PKD1;PTCH1;PTEN;PTPN11;RAD51;RAI1;RARA;SETD1A;SHH;SMAD4;SMC3;TAF1;USP9X;VCP;VPS13B
Liver carcinoma	0.0112579	277	ABCA1;ABCA2;ABCC4;ACACA;ACLY;ACO1;ACSL3;ACTN4;ADAR;AKAP12;ALAS1;AMER1;ANAPC1;AP3B1;APAF1;APC;ARHGEF2;ARID1A;ARID1B;ARID2;ASAP1;ASPM;ATAD2;ATM;ATP1A1;BCAR1;BCL9;BCOR;BCORL1;BCR;BRCA1;BRCA2;BRD1;BRD7;BUB1;CABIN1;CAD;CCDC88A;CCT3;CCT8;CDC5L;CDH2;CDK13;CELSR1;CENPE;CHD4;CIC;CLCN3;CLTC;CNOT1;COPA;CPS1;CROCC;CSE1L;CTNNB1;CTNND1;CUL1;CUL3;CUL4B;CUL5;CUL7;DDB1;DDR1;DENND4A;DICER1;DLGAP5;DNMT1;DPYSL3;DYNC…		Pancreatic intraepithelial neoplasia	2.94761e-05	29	ANXA2;ATM;BRAF;BRCA2;CCND1;CD44;CDKN1A;DCLK1;EGFR;ERBB2;FASN;HIF1A;NCOA3;NES;NOTCH1;NOTCH2;PHGDH;PIK3CA;PIK3CB;PPP2R2A;PPP2R3A;RUNX2;SHH;SMAD4;SMARCA4;STAT3;STRN;TP53;ZEB1
Carcinoma of bladder	0.0113386	102	ABCA1;AGL;APAF1;APC;ATG2B;ATM;ATP7A;ATR;BLM;BRCA1;CCAR2;CDH2;CHAF1A;CTCF;CTNNB1;CUL3;DICER1;DLG5;DNMT1;DROSHA;EIF3A;EIF3B;EIF4G2;EOMES;ERBB2;FBXW11;FGFR1;FLNA;FN1;FYN;GAS1;GEMIN4;GLI2;GNAS;GSN;HDAC2;HIF1A;HSPA4;HSPD1;IGF1R;IQGAP1;KDM1A;KDM5B;KIDINS220;KIF20B;KMT2A;LIG3;LRIG1;LRP6;LZTS1;MAP4;MDC1;MIB1;MKI67;MSH2;MSH6;MTA2;MTOR;MTR;NCOA3;NCOR1;NF2;NOS2;NOTCH1;NSD3;NUMA1;ODC1;PARP1;PBRM1;PHLPP2;PIK3…		Endometrioma	3.10511e-05	21	AKT1;AR;CD44;CTNNB1;EGFR;ERBB2;ESR1;HDAC1;HMGA1;MTOR;MYC;NBR1;NGF;PHB;PTEN;RELA;TET1;TET3;THBS1;TP53;WNK1
Arthrogryposis	0.0114021	15	ADCY6;DYNC1H1;EOMES;ERBB2;FBN2;FBN3;HSPG2;KAT6B;KIF14;KIF5C;PI4KA;PLEC;SYNE1;UBA1;VPS39		Nijmegen Breakage Syndrome	3.10511e-05	21	ATM;ATR;BRCA1;CDKN1A;FANCD2;H2AFX;IGF1R;KMT2A;MDM2;MIB1;MYC;NME1;PARP1;PHGDH;PTEN;SIRT1;SMC1A;TERF1;TERF2;TP53;XRCC6
Abnormality of pelvic girdle bone morphology	0.0115093	10	BAZ1B;CLIP2;FLNB;GTF2I;HSPG2;IFT140;IFT172;LRP5;ORC1;VCP		Neurodegenerative Disorders	3.13375e-05	130	ABCA1;ABL1;AKT1;ALS2;APAF1;APBB1;APEX1;AR;ATM;ATP13A2;ATP7A;ATR;ATRX;BAG6;BRCA2;CALM1;CALM2;CALM3;CDC42;CDK5;CNR1;CREBBP;CTNNB1;DCTN1;DNMT1;DYNC1H1;EGFR;EIF2AK2;EIF2S2;EIF4G2;EPG5;EPHB2;ERBB2;EWSR1;EXOSC6;FIG4;FMR1;FTL;FUS;FYN;GEMIN4;GLI3;GSK3B;GSN;HDAC6;HDAC9;HIF1A;HNRNPA1;HNRNPA2B1;HSP90AA1;HSPA4;HSPA9;HSPD1;HTT;JUN;KAT2B;KAT5;KDM1A;KIDINS220;KIF1A;KIF1B;KIF20B;LRPPRC;LSM2;LYST;MAPK1;MAPK8;MFN2…
LATERAL MENINGOCELE SYNDROME	0.0115093	10	JAK1;MED12;MYLK;NOTCH3;NUP214;PTK2;ROR2;STAT3;TYRO3;VCAN		Brachydactyly	3.23892e-05	36	ACSL3;ATRX;BRAF;EFNB1;FBN1;FGD1;FLII;FLNA;FLNB;GNAS;HDAC4;IFT140;IFT172;INPPL1;INSR;JAG1;KAT6B;KDM5C;LONP1;MEGF8;NBAS;NOTCH1;NOTCH2;PCNT;PLXND1;PTCH1;PTPN11;RAI1;RB1;REV3L;ROR2;RUNX2;SIN3A;SMAD4;SMARCA2;SMC1A
Abscess	0.011534	8	APC;FN1;HDLBP;HIF1A;HSPD1;NES;SETD2;STAT3		Postnatal growth retardation	3.28146e-05	22	ATR;ATRX;BLM;BRAF;BUB1B;CASK;CHD7;CREBBP;CUL7;DMXL2;EP300;FLNA;INSR;KMT2D;MCM4;NBAS;PCNT;PTEN;PTPN11;RAB3GAP2;SEC24D;SNRPB
Hypertrophy of lower jaw	0.011534	16	APC2;CUL7;FBN1;FGFR1;FLII;HERC2;INSR;KDM5C;KIF11;LRP4;LRP5;PTCH1;PTPN11;RAI1;SETD2;UBE3A		Hereditary Nonpolyposis Colorectal Cancer	3.28146e-05	31	APC;ARID1A;ATM;AURKA;BLM;BRAF;BRCA1;BRCA2;CCND1;CDH1;CTNNB1;EGFR;ERBB2;FMR1;GSTP1;HDAC2;MDM2;MLH1;MSH2;MSH3;MSH6;NBR1;PALB2;PIK3CA;PTEN;PTPRG;SMAD2;SMAD4;TIMP2;TP53;ZEB1
Increased size of mandible	0.011534	16	APC2;CUL7;FBN1;FGFR1;FLII;HERC2;INSR;KDM5C;KIF11;LRP4;LRP5;PTCH1;PTPN11;RAI1;SETD2;UBE3A		Urothelial Carcinoma	3.43093e-05	51	AKT1;AR;ATR;CCAR2;CCND1;CDC20;CDKN1A;CREBBP;DLL1;DNMT1;EGF;EGFR;EIF4E;EP300;ERBB2;FGFR1;GSN;GSTP1;HDAC1;HDAC2;HIF1A;MAP1S;MDM2;MIB1;MKI67;MLH1;MSH2;MTOR;MTR;MYC;NOTCH1;NR3C1;NUMA1;PARP1;PCNA;PIK3CA;PIK3CB;PIK3R1;PTBP1;PTCH1;PTEN;RPS6KB1;RSF1;SDC1;SHH;SMAD3;SRRM2;THBS1;TP53;TSC2;XPO5
Mandibular hyperplasia	0.011534	16	APC2;CUL7;FBN1;FGFR1;FLII;HERC2;INSR;KDM5C;KIF11;LRP4;LRP5;PTCH1;PTPN11;RAI1;SETD2;UBE3A		Adenocarcinoma of colon	3.52238e-05	53	ABCA1;ABCC4;ACTG1;BRAF;CAV1;CCND1;CD44;CDC42;CDH1;CDKN1A;CFTR;CSE1L;CTNND1;CTTN;DAXX;EGF;EGFR;EIF4E;EPHB2;ESR1;GSK3B;GSN;HIF1A;HRAS;JUN;MAPK1;MCL1;MLH1;MSH2;MSH3;MSH6;MYC;NME1;NOS2;PARP1;PCNA;PIK3CA;PIK3CB;PLK1;PPARG;PPP1R9B;PROM1;PTEN;PTPN13;PTPRD;SETD2;SMAD4;SPHK1;TBC1D9;TP53;TPT1;ZEB1;ZFYVE9
mandibular excess (physical finding)	0.011534	16	APC2;CUL7;FBN1;FGFR1;FLII;HERC2;INSR;KDM5C;KIF11;LRP4;LRP5;PTCH1;PTPN11;RAI1;SETD2;UBE3A		Feeding difficulties in infancy	3.52238e-05	46	APC2;ARID1A;ATP7A;BRAF;BUB1B;CCDC88A;CPT2;CREBBP;EFTUD2;ELN;EP300;FLII;FLNA;HSD17B4;HSPD1;INSR;KAT6B;KIAA0556;KIF1A;KMT2D;MTR;NDUFA1;NDUFB3;NDUFB9;NDUFS1;NDUFS4;NIPBL;OCRL;ORC1;PEX1;PEX5;PLXND1;PTPN11;RAB3GAP2;RAD21;RAI1;REV3L;SETD2;SIN3A;SMARCA4;SMC1A;SMC3;SOS1;SOS2;TXNL4A;UBE3A
Endometrioid carcinoma ovary	0.011534	7	ARID1A;ERBB2;MSH2;MSH6;PIK3CA;PIK3CB;POLE		Mouth Neoplasms	3.52238e-05	46	ANXA2;APEX1;ATM;AURKA;BRAF;BRCA2;CAV1;CCND1;CDC20;CDH1;CDH2;CDK4;CDKN1A;CTNNB1;EGFR;ERBB2;FANCG;FAT1;GPX1;GSTP1;HIF1A;HRAS;HSPA8;IGF1R;LIG3;LZTS1;MAP2;MDM2;MRPL13;MYC;PCBP2;PCNA;PIK3C2A;PIK3CA;POLB;PPIA;PTK2;RACK1;SDC1;TIMP2;TP53;TSC2;VDR;VHL;VIM;XRCC5
Inverted V-shaped upper lip	0.011534	7	ATRX;CCDC88A;DCHS1;FLII;PPP2R1A;RAI1;ROR2		Thin lips	3.63683e-05	19	CTCF;FIG4;FMR1;GJA1;HDAC4;IGF1R;JAG1;MED12;NBAS;NIPBL;NOTCH2;RAD21;RUNX2;SEC23A;SIN3A;SMC1A;SMC3;TXNL4A;ZBTB16
Missing more than six teeth	0.011534	7	ANKRD11;BCOR;FGFR1;FLNA;LRP6;POLR3A;POLR3B		Tuberous Sclerosis	3.63683e-05	47	AKT1;APC;BRAF;BRCA1;CALM1;CALM2;CALM3;CASK;CCND1;EGF;EGFR;EIF4G1;EPHB2;FLNA;FMR1;GJA1;GSN;HERC1;HTR2C;IRS1;KRT8;LRPPRC;MAPK1;MGEA5;MTOR;NES;NF1;PARK7;PCNA;PIK3CA;PIK3CB;PKD1;PRKD1;PTEN;RALGAPB;RASA1;RBBP4;RPS6;RPS6KB1;RPTOR;STAT3;TP53;TSC2;UBE3B;VHL;VIM;YWHAB
Neoplasms, Neuroepithelial	0.011534	7	APC;BCOR;IGF2BP1;MAP2;MPRIP;TOP2A;TOP2B		Adenocarcinoma of pancreas	3.86538e-05	64	ABCA1;ABCC4;AKT1;ANXA2;APC;BRAF;BRCA1;BRCA2;CCND1;CD44;CDC42;CDC7;CDKN1A;CFTR;CNR1;CRK;CTNNB1;DCLK1;EGFR;EIF3F;EPHB2;ERBB2;FGFR1;HDAC1;HDAC2;HIF1A;HMGA1;IGF1R;IRS2;MAP3K1;MAPK1;MAPK14;MDM2;MMRN1;MSH3;NBR1;NCOA3;NSD3;ODC1;PIK3CA;PIK3CB;PLK1;PNP;PPIA;PRKD1;PTK2;PTPRU;RAD51;RELA;SDC1;SETD2;SHH;SIRT1;SMAD4;SMARCA2;SMARCA4;SP1;SRC;THBS1;TP53;TPT1;WDTC1;WNK1;ZEB1
Ovarian epithelial cancer recurrent	0.011534	7	BRCA1;BRCA2;NBR1;NF2;PARP1;STAT5B;WDTC1		Cleft Palate	4.01967e-05	77	ARVCF;ATR;BUB1B;C2CD3;CASK;CDH1;CENPF;CHD7;CRB2;CRMP1;CTBP1;EFNB1;EFTUD2;EGF;FAF1;FGD1;FGFR1;FLNA;FLNB;FN1;GAS1;GJA1;GLI2;GPC3;GRIP1;GSTP1;HSPG2;KMT2D;MED12;MEIS2;MN1;MTHFD1;MTHFD2;MTR;MYC;MYH9;NEDD4L;NIPBL;NSD2;ORC1;OTX2;PDS5B;PEX5;PHGDH;POLR1A;PTCH1;PTPN11;RARA;RB1;RBM10;RPL11;RPL12;RPL26;RPL35A;RPS17;RPS19;RPS24;RPS28;RPS29;RPS7;RUNX2;SEC24C;SF3B4;SHH;SHMT2;SMAD2;SMAD3;SMAD4;SMS;SNAP91;SNRPB;S…
Paraplegia	0.011534	7	ALS2;CCT5;KIF1A;NOS2;SPAST;SPG11;ZFYVE26		Pemphigus Vulgaris	4.06397e-05	20	ACACA;BMS1;CDH1;CDK2;COL17A1;CRK;DNMT1;DSP;DST;EGFR;HDAC2;HLA-A;HLA-C;HSP90AA1;MAPK1;MAPK14;MAPK8;RACK1;SNRNP70;ST18
Tented mouth	0.011534	7	ATRX;CCDC88A;DCHS1;FLII;PPP2R1A;RAI1;ROR2		Squamous cell carcinoma of penis	4.08656e-05	11	ARID1A;BRAF;CCND1;EGFR;ERBB2;HRAS;MTOR;MYC;PTEN;THBS1;TP53
Tented upper lip	0.011534	7	ATRX;CCDC88A;DCHS1;FLII;PPP2R1A;RAI1;ROR2		Germ cell tumor	4.16942e-05	42	AKT1;APAF1;APC;APEX1;AR;AURKA;BRAF;CCND1;CD44;CDK2;CDK4;CTCF;DICER1;EEF1A1;EGFR;ERBB2;ESR1;GJA1;GPC3;HLA-A;HRAS;INTS2;MDM2;MLH1;MSH6;MYC;NAT10;NME1;NOTCH1;NRIP1;PARP1;PCNA;PPP2R2A;PTBP1;PTEN;PTPN23;PTTG1;SALL4;SENP1;SMAD4;SRRM2;TP53
fibroma	0.011534	7	APC;CTNNB1;FLNA;MIB1;MKI67;MTOR;PTCH1		Thymoma	4.16942e-05	42	ABL1;AKT1;AR;ATM;AURKB;BCOR;BRAF;CCND1;CD44;CDH1;CDK2;CRMP1;EGFR;ERBB2;ESR1;GSK3B;GTF2I;HLA-A;HLA-C;HNRNPA2B1;HRAS;IRS1;IRS2;JAK2;KMT2C;LCK;MAPK14;MCL1;MIB1;MTOR;MYC;NR3C1;PBRM1;PIK3CA;PIK3CB;PTEN;SMARCC1;STAT1;STAT5B;TP53;WDR11;WDTC1
Calvarial defect	0.0115369	5	BMS1;GRIP1;HSPG2;NOTCH1;NSD2		Sandal gap	4.39754e-05	13	ATR;CENPE;CUL4B;DSP;EFNB1;FLNA;FLNB;HERC2;LTBP4;NBAS;PCNT;PIK3CA;SMARCA2
Cranial defect	0.0115369	5	BMS1;GRIP1;HSPG2;NOTCH1;NSD2		Sebaceous Adenocarcinoma	4.39754e-05	13	ABCA1;BRCA1;CDH1;CDKN1A;CTNNB1;ERBB2;FGFR1;MLH1;MSH2;MSH6;PTEN;SHH;TP53
Hyperacusis	0.0115369	5	BAZ1B;CLIP2;FLII;GTF2I;RAI1		Enophthalmos	4.60773e-05	23	AGL;BCR;CREBBP;EP300;FBN1;FLII;FMR1;HDAC4;JAG1;KCNQ3;KDM5C;MAPK1;MEIS2;OCRL;PIK3R1;PLEC;PPP2R5D;RAI1;SIN3A;SMAD4;STAT3;UBE3A;ZBTB20
Phonophobia	0.0115369	5	BAZ1B;CLIP2;CREBBP;EP300;GTF2I		Sunken eyes	4.60773e-05	23	AGL;BCR;CREBBP;EP300;FBN1;FLII;FMR1;HDAC4;JAG1;KCNQ3;KDM5C;MAPK1;MEIS2;OCRL;PIK3R1;PLEC;PPP2R5D;RAI1;SIN3A;SMAD4;STAT3;UBE3A;ZBTB20
Tuberculosis, extrapulmonary	0.0115369	5	BCAR1;CSE1L;CTNND1;LTA4H;NCAPG2		Bowed and upward slanting eyebrows	4.64324e-05	18	BCR;CLP1;CREBBP;CTBP1;EP300;HDAC4;KMT2D;LRPPRC;MAPK1;MEGF8;NIPBL;NSD2;PACS1;RAD21;SIN3A;SMC1A;SMC3;SZT2
ovarian neoplasm	0.0116364	93	ACTN4;AKAP13;APC;ARID1A;ATM;ATP7A;BCAR1;BCL9;BCR;BRCA1;BRCA2;COL4A2;CTCF;CTNNA1;CTNNB1;DDR1;DDX1;DDX5;DICER1;DNMT1;DROSHA;EPB41;EPHB2;ERBB2;FANCD2;FASN;FN1;GLI3;GREB1;HDAC3;HDAC6;HIF1A;HLTF;IDE;IGF2BP1;IGF2R;INSR;IQGAP1;JAG1;KDM1A;KIFC1;MAP3K1;MIB1;MKI67;MSH2;MSH3;MTOR;NAV3;NBR1;NCOA3;NEO1;NOS2;NOTCH1;NOTCH3;NPEPPS;PALB2;PHF20;PIK3CA;PIK3CB;PIK3R1;PLXNB1;PPP2R1A;PPP2R5D;PSD3;PTCH1;PTK2;PTPN13;PTP…		Malignant neoplasm of female breast	4.64324e-05	18	AR;ATM;BRCA1;BRCA2;CCND1;EGFR;ERBB2;ESR1;ESYT1;MYC;PALB2;PCNA;PIK3CA;PTEN;RPA2;TP53;VDR;ZNF217
leiomyosarcoma	0.0118306	18	ATRX;BRCA1;CDH2;FUS;IRS2;JAK1;MED12;OBSCN;PIK3CA;PIK3CB;RB1;RICTOR;ROR2;STAT3;TBC1D9;TYRO3;VCAN;ZEB1		Thick, flared eyebrows	4.64324e-05	18	BCR;CLP1;CREBBP;CTBP1;EP300;HDAC4;KMT2D;LRPPRC;MAPK1;MEGF8;NIPBL;NSD2;PACS1;RAD21;SIN3A;SMC1A;SMC3;SZT2
Lymphoma	0.0127036	116	ABCA1;ABL1;APAF1;APC;ARID1A;ASXL1;ATM;ATR;BCAR1;BCR;BLM;BRCA1;BRCA2;BUB1;CCAR2;CLTC;CREBBP;CTCF;CUL1;DDR1;DHX32;DHX9;DNMT1;DYNC1H1;EEF2;EIF4A2;EIF4G1;EML4;EP300;EPHA7;EPHB2;ERBB2;FBN1;FGFR1;FLII;FLNB;FN1;GLDC;HDAC6;HIF1A;HSD17B4;HSPA4;HSPH1;HUWE1;IGF2BP1;JAG1;KMT2A;KMT2B;KMT2D;LONP1;LRP5;LYST;MAP4K4;MCM2;MCM3AP;MCM6;MIB1;MKI67;MSH2;MSH3;MSH6;MTOR;MTR;MUM1;NF1;NOS2;NOTCH1;NOTCH2;NOTCH3;NSD1;NSF;NU…		Neoplastic Syndromes, Hereditary	4.78647e-05	16	AKT1;APC;BRAF;BRCA1;BRCA2;CDH1;DICER1;MLH1;MSH2;NF1;PIK3CA;PIK3CB;PTEN;SMAD4;TP53;VHL
Acute Myeloid Leukemia Arising from Previous Myelodysplastic Syndrome	0.0128058	9	ASXL1;CTNNA1;DNMT1;KMT2A;MSH2;NUP98;PRDM16;SF3B1;TBC1D9		Conductive hearing loss	4.83952e-05	34	APC2;ARVCF;DCHS1;EFTUD2;FLII;FLNA;FLNB;FRAS1;GJA1;GRIP1;IFT140;IFT172;KMT2D;LRP5;NIPBL;NOTCH2;NOTCH3;PROM1;PRPF31;PRPF4;PRPF6;PRPF8;RAD21;RAI1;SEC24C;SETD2;SF3B4;SMC1A;SMC3;SNRNP200;SNRPB;TSHZ1;TXNL4A;ZBTB20
Inflammatory Myofibroblastic Tumor	0.0128058	9	CLTC;DCTN1;ERBB2;FN1;MIB1;MKI67;RANBP2;SEC31A;WDR48		Class III malocclusion	5.12966e-05	28	APC2;ARHGAP21;CAV1;CUL7;FBN1;FGFR1;FLII;FMR1;GJA1;GPC3;HERC2;INSR;KDM5C;KIF11;LRP4;LRP5;NSD1;PPARG;PTCH1;PTEN;PTPN11;RAI1;RUNX2;SETD2;SMAD4;SMS;TXNL4A;UBE3A
Hydronephrosis	0.0130211	16	ATP7A;ATRX;BCOR;CHD7;CPT2;EPHA7;FGFR1;FLNA;KAT6B;LTBP4;PEX1;PEX5;PLEC;RBM10;ROR2;WASHC5		MIXED LINEAGE LEUKEMIA	5.19055e-05	43	AFDN;ATM;BCOR;BCR;BRCA1;CALM1;CALM2;CALM3;CCND1;CDK9;CREB1;ESR1;FRYL;HDAC1;IGF1R;KDM4A;KDM4B;KDM5A;KMT2A;KMT2B;KMT2C;KMT2D;MAP1A;MAPK8;MCL1;MDM2;MYC;NCAM1;NPM1;PCNA;POLD1;PROM1;RAD51;RARA;RFC1;RNF20;SALL4;SMARCA1;SNAP91;TET1;TOP2B;TP53;USP7
Neoplastic Cell Transformation	0.01309	20	ACTG1;APC;BRCA1;BRCA2;CTNNB1;CTNND2;ERBB2;FN1;IGF1R;MTR;NOS2;NOTCH1;NSD2;PARG;PHGDH;PHLPP1;PTK2;PTPRS;STAT3;ZEB1		Patent ductus arteriosus	5.21078e-05	49	ACACA;ANXA2;BCOR;BMS1;BRAF;BRCA1;BTRC;CDK4;CFTR;CHD7;CREBBP;DPM1;EP300;ERBB2;FASN;FBN1;FBN2;FLNA;GJA1;GLI3;GPC3;GSK3B;KAT6A;MEGF8;MTA2;NCL;NOTCH2;NOTCH3;PARP1;PER1;PEX1;PHGDH;PIK3CA;PIK3CB;PLXND1;POLR1A;PTPN11;RAC1;ROCK1;SMAD4;SMARCA1;SMARCA4;SREBF1;SSRP1;STAT3;TP53;USP11;USP9X;ZEB1
Broad cranium shape	0.0132021	17	ATP7A;FBN1;FBN2;FGFR1;FLII;HCFC1;LRP5;NBAS;NIPBL;RAB3GAP2;RAD21;RAI1;SLC12A6;SMC3;TECPR2;UBE3A;WASHC5		Hypotrophic malar bone	5.21078e-05	37	AGL;ARVCF;ATRX;BLM;BUB1B;CHD7;CUL7;DCHS1;EFTUD2;FBN1;FGFR1;FLNA;FLNB;GLI2;HSPG2;INPPL1;KIF1A;LRP2;LRPPRC;LTBP4;NF1;NOTCH3;OBSL1;PEX1;POLE;RAB3GAP2;RAI1;ROR2;RUNX2;SEC23A;SEC24C;SERPINH1;SF3B4;SHH;SMAD4;SNRPB;ZBTB20
Wide skull shape	0.0132021	17	ATP7A;FBN1;FBN2;FGFR1;FLII;HCFC1;LRP5;NBAS;NIPBL;RAB3GAP2;RAD21;RAI1;SLC12A6;SMC3;TECPR2;UBE3A;WASHC5		Malar flattening	5.21078e-05	37	AGL;ARVCF;ATRX;BLM;BUB1B;CHD7;CUL7;DCHS1;EFTUD2;FBN1;FGFR1;FLNA;FLNB;GLI2;HSPG2;INPPL1;KIF1A;LRP2;LRPPRC;LTBP4;NF1;NOTCH3;OBSL1;PEX1;POLE;RAB3GAP2;RAI1;ROR2;RUNX2;SEC23A;SEC24C;SERPINH1;SF3B4;SHH;SMAD4;SNRPB;ZBTB20
Sezary Syndrome	0.0132021	19	ABCA1;ABL1;ARID1A;BCR;CHD3;CREBBP;ERBB2;JAK1;KMT2C;KMT2D;NAV3;NEDD4L;PLCG1;PLS3;RB1;SMARCA4;STAT3;STAT5B;ZEB1		Carcinosarcoma	5.22739e-05	19	BRCA1;CCND1;CDK4;DYNC1H1;EGF;EGFR;ERBB2;MDM2;MKI67;MLH1;MSH2;NME1;PIK3CA;PPP2R1A;PTCH1;PTEN;TP53;TSHZ1;VIM
Pancreatic Ductal Adenocarcinoma	0.0132693	68	AKAP12;AP2A1;APC;ARID1A;ASPM;ATM;ATR;BRCA1;BRCA2;CCAR2;CHD7;CREBBP;CTNND1;DDR1;DLG5;DNMT1;DPYSL3;EML1;EPHB2;ERBB2;FASN;FGFR1;FN1;GLI2;GNAS;HDAC2;HEATR1;HIF1A;IGF1R;KDM2B;KMT2C;LONP1;MAML3;MAP1S;MSH3;MTA2;MTOR;MYO10;NES;NOTCH1;NOTCH2;NSD3;PALB2;PARP1;PHLPP1;PIK3CA;PIK3CB;PIK3R1;PLEC;PPP2R3A;PRAG1;PREX2;PTCH1;RB1;ROBO1;ROR2;RRM1;SETD2;SMARCA4;SREBF1;SSRP1;STAT3;USP9X;VCAN;WNK1;XPR1;XRCC5;ZEB1		Congenital Abnormality	5.23029e-05	107	ACTG1;ALMS1;ANKRD11;APAF1;AR;ARFGEF2;BRAF;C2CD3;CASK;CENPF;CFTR;CHD7;CREB1;CTNNB1;CUL4B;DYNC1H1;EFNB1;EP300;EPHA7;ERBB2;ESR1;FANCA;FANCC;FANCD2;FBN1;FGFR1;FIG4;FLNA;FLNB;FMR1;FUS;GAS1;GJA1;GLI3;GPC3;GRK2;GSTP1;GTF2I;HDAC4;HSP90AA1;HSPA9;HTT;IGF1R;INSR;JAG1;KIF5C;KMT2B;KMT2D;LAMB2;MED13L;MTHFD1L;MTOR;MTR;MYC;NAT10;NCL;NF1;NIPBL;NOL11;NOTCH1;NSD1;NUP214;OTX2;PAFAH1B1;PBX1;PIK3CA;PIK3CB;PKP2;PLEC;PP…
Oropharyngeal disorders	0.013483	11	BCAR1;CSE1L;CTNND1;DSP;ERBB2;GNAS;HSPD1;LRP5;PIK3CA;SMG1;STAT1		Adenocarcinoma of large intestine	5.25659e-05	40	AKT1;APC;ATP7A;BRAF;BRD8;CCND1;CD44;CDC42;CDKN1A;CREBBP;EGF;EGFR;EPHB2;ERBB2;FLNA;FN1;GNAS;GOLGA5;GPC3;HNRNPK;INSR;MDM2;MLH1;MSH3;MSH6;MYC;NME1;NOS2;PAK1;PCNA;PROM1;PTBP1;RUNX2;SIRT1;SMAD2;SRRM2;SRSF11;STAT5B;TBC1D9;TP53
Umbilical hernia	0.013483	14	ATP7A;ATRX;CHD7;FGD1;HSPG2;INSR;LRP2;LTBP4;MED12;NOTCH2;NOTCH3;PTCH1;ROR2;SALL1		TARSAL-CARPAL COALITION SYNDROME	5.25659e-05	40	APAF1;AR;ARID1A;CCND1;CD44;CDK2;CDKN1A;CHD6;DNMT1;EGFR;EPHB2;ERBB2;ESR1;FN1;GNAS;GSTP1;HIF1A;HLA-C;HRAS;JUP;KRT8;LZTS1;MLH1;MSH2;MSH6;MTR;NF1;NME1;PCNA;POLD1;PTCH1;PTEN;RB1;SLC12A6;SPAG9;SPG11;TBC1D9;TNKS;TP53;ZFYVE26
Noninfiltrating Intraductal Carcinoma	0.013483	36	ATM;BCL9;BRCA1;BRCA2;CREBBP;CTCF;CTNNB1;ERBB2;FASN;FAT1;FGFR1;GSN;HEATR6;HIF1A;IRS2;KDM2A;KIAA0100;LPCAT1;MKI67;MSH6;NCOA2;NCOA3;NCOR1;NCOR2;NOTCH1;NRDC;NRIP1;PARP1;PIK3CA;PIK3CB;PTCH1;SREBF1;SRRM2;STAT1;STAT5B;TOP2A		Monosomy	5.28545e-05	35	ABL1;ASXL1;BCR;CBL;CCND1;CDKN1A;CTNNB1;EGF;EGFR;ESR1;IGF1R;MYC;NCAM1;NF1;NF2;NPM1;PAFAH1B1;PIK3CA;PTEN;PTPN11;RARS;RB1;SF3B1;SHH;SOD1;STAT1;STAT3;STAT5B;TBC1D9;TOP2A;TP53;VDR;VIM;XPO5;YWHAE
Spots on skin	0.013483	36	APC;ATM;BCR;BRCA1;BRCA2;CTCF;EEF2;ERBB2;FANCD2;FBN1;FBXO11;FN1;GNAS;GSN;HADHA;HSPA8;IGF1R;INTS2;KMT2A;LRP1;LRP2;MSH2;MSH6;MYO9B;NES;NF1;NOTCH1;PIK3CA;PIK3CB;PTCH1;PTPN11;RB1;SPTAN1;TOP2A;TSC2;ZFHX3		Inflammatory Myofibroblastic Tumor	5.73371e-05	15	BRAF;CCND1;CLTC;DCTN1;ERBB2;FN1;MDM2;MIB1;MKI67;NPM1;RANBP2;SEC31A;TP53;WDR48;YWHAE
Acute biphenotypic leukemia	0.0140891	8	ABL1;BCR;KAT6A;KMT2A;KMT2B;KMT2D;NCOA2;NUP98		Broad forehead	5.97564e-05	21	BAZ1B;CASK;CLIP2;CUL7;ELN;FGD1;FLII;FLNA;GTF2I;JAG1;LRP2;LRP5;NOTCH2;OBSL1;PIK3CA;POLE;PTEN;RAI1;RFC2;WASHC5;ZBTB20
Congenital hemivertebra	0.0140891	8	ATRX;GLI3;JAG1;KMT2D;ORC1;PTCH1;ROR2;WASHC5		Scleroderma	6.84086e-05	38	BLM;CAV1;CD44;CEBPZ;CRK;DLL1;DNMT1;EGF;EGFR;EPHB2;EXOSC10;FBN1;FLII;FN1;HLA-A;HLA-C;LEMD3;MAPK1;MAPK14;MYC;PIK3CA;PIK3CB;POLR3A;PTBP1;RELA;RNPS1;SERPINH1;SMAD2;SMAD3;SMAD4;SP1;SRRM2;THBS1;TP53;UBE4A;UBE4B;WNK1;YY1
Flat back of the head	0.0140891	8	INPPL1;KIF11;LEMD3;PEX1;PEX5;PTCH1;UBE3A;ZNF592		Malignant neoplasm of gallbladder	7.04765e-05	42	APC;BIRC5;CALM1;CALM2;CALM3;CD44;CDH1;CDK2;DCAF1;EGFR;EPHB2;ERBB2;ESR1;FEN1;GNL3;GPC3;GSTP1;HIF1A;HLA-A;HSPD1;MAPK1;MAPK8;MLH1;MSH2;MSH3;MYC;NOS2;PHB;PHLPP1;PIK3CA;PIK3CB;PRDX1;PROM1;SMAD4;ST8SIA4;TBC1D9;TIMP2;TP53;TRO;VIM;WDTC1;ZEB1
Flat occiput	0.0140891	8	INPPL1;KIF11;LEMD3;PEX1;PEX5;PTCH1;UBE3A;ZNF592		Virus Diseases	7.13121e-05	125	ABL1;ADAR;AKT1;APC;ATF7IP;ATM;CD44;CDH1;CDK2;CDK9;CDKN1A;CFTR;CHEK1;CREB1;CREBBP;CRK;CSTF2;CTNNB1;CTTN;DAXX;DDR1;DDX46;DHX16;DHX58;DHX9;DICER1;DLL1;DNMT1;DROSHA;EGF;EGFR;EHMT1;EIF2AK2;EIF2AK4;EIF2S2;EIF4A2;EIF4E;EIF4G1;EOMES;EPG5;EPHB2;ERBB2;ESR1;FASN;FGFR1;FLNB;FN1;GJA1;GSK3B;HDAC1;HDAC3;HDAC9;HLA-A;HLA-C;HRAS;HSPA4;HSPA8;HSPD1;IARS;IGF2R;IPO7;JAK1;JUN;KIF1B;LRPPRC;LSAMP;MAPK1;MAPK14;MAPK8;MCL1;…
Monoparesis - leg	0.0140891	8	DCTN1;HSPD1;KIF1A;KIF5A;NF1;SPAST;WASHC5;ZFYVE26		Barrett Esophagus	7.17164e-05	56	AKAP12;APC;ARID1A;BUB1;CAV1;CCND1;CD44;CDK2;DCLK1;EGF;EGFR;ERBB2;ESR1;FASN;GNL3;GPX1;GSTP1;H2AFX;HIF1A;HLA-C;HRAS;IGF1R;JAG1;JMJD1C;MCL1;MDM2;MKI67;MLH1;MSH2;MTR;MYC;NES;NME1;NOS2;NOTCH1;NOTCH2;NOTCH3;PARP1;PCNA;PIK3CA;PIK3CB;PPARG;PROM1;RELA;RFC3;ROCK2;SMAD4;SOD1;SSRP1;STAT3;TP53;UBL5;VDR;VIM;XPR1;ZNF217
Nonmedullary Thyroid Carcinoma	0.0140891	8	ASAP1;DICER1;GOLGA5;MTOR;PCM1;PIK3CA;PIK3CB;TRIM24		Trichohepatoenteric Syndrome	7.25102e-05	53	ABL1;ALS2;APC;AR;ATM;ATR;ATRX;BUB1B;BUD13;CALR;CDC42;CDK4;CREBBP;DKC1;EGF;EHMT1;EP300;FANCC;FBN1;FGFR1;FMR1;FTL;GLI3;HSPA4;HUWE1;INSR;KRT8;LPIN2;LYST;MEA1;MLH1;MSH2;MSH6;NR3C1;NSD1;PAFAH1B1;PPARG;PTBP1;PTCH1;RAD51;RAI1;SOD1;SRRM2;STAT5B;TP53;TTC37;TTF1;UBE3A;VDR;VHL;VPS13B;ZBTB20;ZMYM2
Gastroesophageal reflux disease	0.0143354	25	APC;ATRX;BAG6;CHD7;FASN;FLII;FLNA;HSPA4;IGF1R;KIF1A;LTBP4;NES;NIPBL;NOS2;NSD2;ORC1;PIK3CA;RAD21;RAI1;SALL1;SMC3;TECPR2;TOP2B;TP53BP1;TSC2		Hypertrophy of lower jaw	7.37411e-05	26	APC2;CAV1;CUL7;FBN1;FGFR1;FLII;FMR1;GJA1;GPC3;HERC2;INSR;KDM5C;KIF11;LRP4;LRP5;PPARG;PTCH1;PTEN;PTPN11;RAI1;RUNX2;SETD2;SMAD4;SMS;TXNL4A;UBE3A
Meningioma	0.0144044	51	AP1B1;AP2B1;APC;ATM;BCR;BRCA1;BRCA2;CTNNB1;DNMT1;DSP;EPB41;ERBB2;FAT3;FGFR1;HIF1A;IGF1R;IGF2BP1;JAG1;JAK1;KMT2A;MCM2;MCM4;MCM6;MGEA5;MIB1;MKI67;MN1;MSH2;MSH3;MTOR;MTR;NF1;NF2;NOS2;NOTCH1;NOTCH2;ODC1;PARP1;PIK3CA;PIK3CB;RACGAP1;RB1;RFC1;SEC23B;SMARCA1;STAT3;TNKS;TOP2A;VCAN;XRCC5;ZNF197		Increased size of mandible	7.37411e-05	26	APC2;CAV1;CUL7;FBN1;FGFR1;FLII;FMR1;GJA1;GPC3;HERC2;INSR;KDM5C;KIF11;LRP4;LRP5;PPARG;PTCH1;PTEN;PTPN11;RAI1;RUNX2;SETD2;SMAD4;SMS;TXNL4A;UBE3A
Adult Acute Lymphocytic Leukemia	0.0144237	16	ABL1;APC;ATM;BCR;ERBB2;JAK1;KDM5A;KMT2A;MTR;MYCBP2;NEO1;NF1;POLG;RFC1;SRRM2;XRCC5		Mandibular hyperplasia	7.37411e-05	26	APC2;CAV1;CUL7;FBN1;FGFR1;FLII;FMR1;GJA1;GPC3;HERC2;INSR;KDM5C;KIF11;LRP4;LRP5;PPARG;PTCH1;PTEN;PTPN11;RAI1;RUNX2;SETD2;SMAD4;SMS;TXNL4A;UBE3A
Babinski Reflex	0.0144359	19	ATP13A2;CCT5;HSPD1;KDM5C;KIF1A;KIF1C;KIF5A;MFN2;NDUFS1;OPA1;PNPLA6;POLR3A;POLR3B;SACS;SETX;SPAST;VCP;WASHC5;ZFYVE26		mandibular excess (physical finding)	7.37411e-05	26	APC2;CAV1;CUL7;FBN1;FGFR1;FLII;FMR1;GJA1;GPC3;HERC2;INSR;KDM5C;KIF11;LRP4;LRP5;PPARG;PTCH1;PTEN;PTPN11;RAI1;RUNX2;SETD2;SMAD4;SMS;TXNL4A;UBE3A
Anaplastic large B-cell lymphoma	0.0144359	6	EML4;INSR;PIK3CA;PIK3CB;PTPN11;ROR2		Autistic Disorder	7.44564e-05	131	ACACA;ADNP;AFF2;AGAP1;AGO2;AGRN;AKT1;ANK3;ANKRD11;APC;AR;ARHGAP32;ARHGEF2;ARID1B;ATRX;BAZ1B;BMS1;CACNA1H;CASK;CDK5;CHD7;CHD8;CLIP2;CMAS;CNR1;CREBBP;CRK;CSDE1;CSRNP3;CTNNB1;CTNND2;CUL7;CYFIP1;DOCK11;EGF;EIF3A;EIF4E;ELN;EP300;EPHB2;ESR1;FMR1;FXR1;FXR2;GJA1;GPX1;GRIA2;GRIP1;GSTP1;GTF2I;HDLBP;HIP1;HLA-A;HLA-C;HRAS;HSD17B4;HTR2C;HTT;ITGA6;JMJD1C;KDM5C;LRP2;MAGED1;MAP2;MAPK1;MAPK8;MAPK8IP2;MCM7;MED12;M…
Left Ventricular Non-Compaction Syndrome	0.0144359	6	MIB1;NNT;NOTCH1;PLEC;PLEKHM2;PRDM16		Precursor Cell Lymphoblastic Leukemia Lymphoma	7.45638e-05	98	ABCC4;ABL1;ACTG1;AKT1;APAF1;ATF4;ATM;ATR;AURKA;BAG6;BCR;BRAF;BRD7;BUB1;CASP8AP2;CCND1;CD44;CDK2;CDK4;CDKN1A;CHEK1;CREB1;CYFIP1;DAXX;DDR1;DHX32;DLL1;DNER;DNMT1;EIF2AK2;EIF3A;EPHA3;ESR1;EWSR1;FGFR1;FUS;GLI3;GSTP1;H2AFZ;HLA-A;HLA-C;HSP90AA1;HSPA4;IGF1R;JAK1;JAK2;JMJD1C;KAT2B;KAT6A;KMT2A;LCK;LEF1;LRP5;MAPK1;MCL1;MCM2;MDM2;MSH2;MSH3;MTHFD1;MTR;MYC;NCAM1;NOTCH1;NOTCH3;NPM1;NR3C1;NSD2;PBX1;PDE3B;PIK3CA;…
Stage IV Bladder Cancer AJCC v6	0.0144359	6	ERBB2;GLI2;MTOR;PIK3CA;PIK3CB;RRM1		Pulmonary Stenosis	7.46684e-05	19	BAZ1B;BCOR;BRAF;CHD7;CLIP2;ELN;FBN1;GPC3;GTF2I;HRAS;JAG1;NF1;NOTCH1;PTPN11;RFC2;SOS1;SOS2;STAT3;WASHC5
Brachycephaly	0.0144649	17	ATP7A;FBN1;FBN2;FGFR1;FLII;HCFC1;LRP5;NBAS;NIPBL;RAB3GAP2;RAD21;RAI1;SLC12A6;SMC3;TECPR2;UBE3A;WASHC5		Refractory anaemia with excess blasts	7.6555e-05	13	AKAP12;ASXL1;BCR;CBL;CHEK1;KMT2A;NCAM1;NSD1;PAFAH1B1;SF3B1;SRSF2;U2AF1;YWHAE
Chronic myeloproliferative disorder	0.0145239	29	ABCA1;ABL1;ASXL1;BCR;CENPE;CREBBP;EP300;FGFR1;FLII;FN1;HSPA4;HSPA9;IRS2;JAK1;NES;NIN;NOS2;NUP98;ODC1;PIK3CA;PIK3CB;PTPN11;RARS;SF3B1;STAT3;STAT5B;TBC1D9;TET1;ZMYM2		Influenza	7.67178e-05	87	ABCA1;ABL1;ADAR;APC;ARHGAP21;ATP2C1;BCR;CDC42;CDK9;CFTR;CHD6;CPT2;CREB1;CRK;DDX5;DHX58;DHX9;DLL1;DOCK3;EGFR;EIF2AK2;EIF4A1;EIF4A2;EIF4E;EIF4G1;EPG5;EPHB2;FGFR1;FLNA;FN1;HDAC1;HDLBP;HEATR6;HLA-A;HLA-C;HNRNPA2B1;HSPA4;HSPA8;HSPD1;IPO5;JUN;LSAMP;MAPK1;MAPK14;MAPK8;MARS;MED1;NOS2;NPM1;NUP214;PABPN1;PBRM1;PIK3CA;PIK3CB;PKD1;PPARG;PPIA;PTBP1;PTK2;PTPN11;RAD51;RANBP2;RASA1;RBBP6;RELA;RPS19;RTN4;SERPINH1…
Progressive disorder	0.0148106	24	DNMT1;FIG4;GNAS;HK1;HSPD1;KIF1A;KIF1C;KIF5A;LEMD3;LRBA;MARS;PNPLA6;POLG;POLR3A;POLR3B;SBF1;SETX;SLC12A6;SPAST;SYNJ1;VPS13A;WASHC5;XPR1;ZFYVE26		Microstomia	7.67178e-05	25	AKT1;CHD7;CREBBP;EP300;FBN1;FLNA;GJA1;HSPG2;IARS2;MED12;NOTCH2;ORC1;ORC4;OTX2;PAFAH1B1;PIK3CA;POLD1;PTCH1;PTEN;SIN3A;SMAD4;TTC37;TXNL4A;YWHAE;ZBTB16
Narrow palate	0.0148106	7	CPT2;CREBBP;EP300;FBN1;HERC2;MED12;MEGF8		Granulosa cell tumor of the ovary	7.7512e-05	8	CTNNB1;EGFR;ERBB2;MTOR;PTEN;SMAD3;TP53;VCP
Failure to gain weight	0.0148394	46	AARS;ABCA3;AHDC1;ATP5A1;CHD7;CPS1;CREBBP;DSP;EP300;FASTKD2;FGD1;FGFR1;FLNA;GNAS;HADHA;HCFC1;HSD17B4;JAG1;KMT2A;KMT2D;LARS;LEMD3;LPIN2;LRBA;LRPPRC;MARS;MTR;NDUFS1;NIPBL;NNT;NOTCH1;NOTCH2;NSD2;OCRL;ORC1;PEX1;PEX5;PIK3CA;PIK3R1;PLEC;POLG;RAD21;RAI1;RBM10;SMC3;TTC37		Neoplasms, Second Primary	7.90581e-05	47	ATP5A1;AURKA;BIRC5;BIRC6;BRCA1;BRCA2;CAV1;CD44;CDC7;CDK4;CTNNB1;DICER1;DLL1;DROSHA;FANCD2;FEN1;GEMIN4;GSTP1;HLA-A;IGF2BP1;KMT2A;MDM2;MLH1;MSH2;MTR;NDUFA6;NOTCH1;PLK1;RAD9A;RAN;RARA;RB1;RGS12;RICTOR;RPA1;RPS6KB1;RRM1;RXRA;SETD1A;SMAD3;SMC1B;SP1;TP53;VDR;XPO5;XRCC5;YY1
Epilepsy	0.0148394	108	ADGRV1;ANK2;ANKRD11;ARFGEF2;ARID1A;ATM;ATP5A1;ATP7A;ATR;ATRX;BCOR;CACNA1H;CAD;CAMSAP2;CASK;CCDC88A;CENPE;CHD2;COL4A2;CPS1;CPT2;CREBBP;CUL4B;CYFIP1;DIAPH1;DPYSL3;DYNC1H1;ELFN1;EML1;EP300;EPG5;EPHA3;EPHB2;FASTKD2;FGFR1;FIG4;FLNA;FN1;GLDC;GLI2;GLI3;GNAS;HIP1;HSD17B4;HSPA4;HSPD1;HTT;IFT140;KAT6B;KDM1A;KDM5C;KIF4A;KIF5A;KIF5C;KMT2D;LARS;LYST;MAPK8IP3;MED1;MED12;MPDZ;MSH2;MSH3;MSH6;MTOR;MTR;MYO5A;NDUFS…		Actinic keratosis	7.90581e-05	24	BCAR1;BRAF;CDK4;CDKN1A;CKS1B;COL17A1;CSE1L;CTNND1;EGFR;GSTP1;H2AFX;HRAS;MAPK1;MYC;PCNA;POLR2G;PTEN;PTTG1;SMAD4;SMARCA2;TP53;TP53BP1;VDR;VIM
Autism Spectrum Disorders	0.0148394	53	ADNP;AFF2;ANK3;ANKRD11;APC;CACNA1H;CAPRIN1;CASK;CDH2;CHD2;CHD7;CHD8;CTNND2;CYFIP1;EHMT1;EPHB2;GLI3;GTF2I;HERC2;IRS2;JARID2;JMJD1C;LRP2;MIB1;MKI67;MPDZ;MTOR;NBEA;NDUFS1;NEO1;NOS2;NOTCH1;PIK3CA;PIK3CB;POGZ;PPP2R5D;RAI1;RFC1;SETD1A;SETD2;SIN3A;SLU7;SND1;SRRM2;SYNE1;TCF20;TET1;TRIO;TSC2;UBE3A;USP7;VPS13B;ZNF423		Multiple tumors	7.90581e-05	24	AKT1;APC;AR;BRAF;BRCA1;BRCA2;BTRC;CDC20;CDK4;CTNNB1;CUL1;DICER1;ESPL1;HSPA4;KIF5B;MDM2;MLH1;MSH2;MYC;NF2;PTCH1;PTEN;TP53;UTRN
Blepharophimosis	0.0148394	12	ATR;BAZ1B;BCOR;CLIP2;CUL4B;DCHS1;GTF2I;HSPG2;KAT6B;KMT2A;MED12;ORC1		Undifferentiated carcinoma	7.90581e-05	24	BRAF;BRCA1;CCND1;CDK2;CDKN1A;CTNNB1;EGFR;ERBB2;FBN2;FN1;MLH1;MSH2;NBR1;PCNA;PIK3CA;PPARG;PPP2R1A;PTCH1;PTEN;RELA;SMARCAL1;STAT3;TP53;WNK1
Congenital pectus carinatum	0.0148394	12	ATP7A;FBN1;FBN2;FLNB;HSPG2;KAT6B;MEGF8;ORC1;PTPN11;RAB3GAP2;SOS1;SOS2		Adenocarcinoma Of Esophagus	8.07028e-05	54	ABL1;AKAP12;APC;AR;ARID1A;ASPM;AURKA;CALR;CCND1;CDH1;CDKN1A;DCLK1;DNMT1;EGF;EGFR;EIF4A2;EIF4E;EIF4G1;EPHB2;ERBB2;ESR1;FASN;GSTP1;H2AFX;IGF1R;JAK2;MAPK1;MDM2;MEGF8;MTOR;MTR;MYC;PARP1;PCNA;PIK3CA;PIK3CB;PLK1;POLD1;PPARG;PROM1;PTBP1;RAC1;RARA;RFC3;ROCK2;RPS6KB1;SMAD4;SRRM2;STAT3;TP53;TSC2;UBL5;VDR;VIM
Multiple polyps	0.0148394	12	APC;ATM;EPHB2;FOCAD;HLTF;MSH2;MSH3;MSH6;MTOR;ODC1;POLD1;POLE		Cafe au lait spots, multiple	8.07028e-05	11	AKT1;BRAF;FANCG;GNAS;MLH1;MSH2;NF1;PCNT;PTEN;SMARCAL1;TSC2
B-Cell Lymphomas	0.0149853	71	ABL1;ARID1A;ASAP1;ASCC3;ASXL1;ATM;BCL9;BCR;BLM;BRCA2;CLTC;CSE1L;CTCF;EIF4A2;EP300;EPHA7;EPHB2;ERBB2;ESPL1;FBXO11;FGFR1;FN1;GLI2;HDAC3;HDAC6;HIP1;HSPH1;HUWE1;IGF1R;INSR;IRS2;JAG1;KMT2A;KMT2B;KMT2D;LONP1;MAP4;MFHAS1;MIB1;MKI67;MSH2;MSH3;MTOR;MTR;MUM1;NCOR2;NES;NOS2;NOTCH1;NOTCH2;PARP1;PIK3CA;PIK3CB;PIK3R1;PLXNA2;PTPN11;PTPRG;REV3L;SF3B1;SREBF1;STAT3;STAT5B;TBC1D9;TET1;TP53BP1;TRIO;UBR1;USP9X;WDTC1;…		Hemimegalencephaly	8.07028e-05	11	AKT1;CCND1;HRAS;MAP2;MTOR;MYC;PCNA;PIK3CA;PIK3CB;PTEN;TSC2
Colorectal Neoplasms	0.0152963	108	ABCA1;ABCA3;ABCC4;ABL1;APAF1;APC;APC2;ARHGEF2;ASCC3;ATM;ATP6V0A1;BCR;BLM;BRCA1;BRCA2;BRD8;BUB1;CASP8AP2;CTNNB1;DNMT1;EP300;EPHB2;ERBB2;EXTL3;FANCD2;FAT1;FBN2;FGFR1;FLNC;FUS;GLI3;GNAS;GSN;HDAC2;HDAC3;HIF1A;HK1;HSPH1;IGF1R;INSR;JAG1;JAK1;KDM4B;LAMA1;LIG3;LLGL1;LRIG1;LRP1;LRP6;MCM2;MEGF8;MKI67;MSH2;MSH3;MSH6;MTMR3;MTR;NCOR1;NCOR2;NES;NF1;NIPBL;NOS2;NOTCH1;NOTCH3;ODC1;PABPC4;PARP1;PARP4;PATZ1;PER1;PH…		Lobular carcinoma in situ of breast	8.07028e-05	11	BRCA1;CDH1;CTCF;ERBB2;ESR1;MAP3K1;MLH1;MSH2;NME1;PIK3CA;TP53
Ataxia Telangiectasia	0.0152963	47	ATM;ATR;BLM;BRCA1;BRCA2;CHAF1A;CLSPN;CUL5;DOCK3;DYNC2H1;EPHB2;ERBB2;FANCD2;FBXO18;FN1;GLI3;HIF1A;IFT172;IRS2;LIG3;MDC1;MED1;MTOR;NCOR2;NES;NOTCH1;PIK3CA;PIK3CB;PJA2;POLD1;PRKDC;PTCH1;RNF20;SETD2;SETX;SPTBN2;STAT3;STAT5B;TAF1;TCP1;TIMELESS;TOP2A;TP53BP1;TRIM28;UPF1;WDTC1;XRCC5		Sebaceous adenoma	8.07028e-05	11	AKT1;HRAS;MLH1;MSH2;MSH6;PIK3CA;PLCD1;PTEN;RAC1;SEC23B;TSC2
Burkitt Lymphoma	0.0158887	42	ABL1;APAF1;APC;ARID1A;ATM;BCL9;BCR;BRCA1;CAD;CSE1L;DNMT1;EP300;EPHB2;ERBB2;FN1;HIF1A;HSPA4;INSR;JAK1;KMT2A;MCM2;MIB1;MKI67;MUM1;NAA15;NOTCH1;NOTCH2;NUP214;PHGDH;PIK3CA;PIK3CB;PIK3R1;RBL2;SMARCA1;SMARCA4;SMC3;SPAG9;STAT3;TBC1D9;TPP2;TSC2;TYRO3		Congenital malformation syndrome	8.07092e-05	12	ASXL1;BRCA1;CHD7;CREBBP;EP300;FLNA;HCFC1;KMT2B;KMT2D;MED12;MYH9;SALL1
Rhabdomyosarcoma, Embryonal	0.0158887	16	AMER1;ATRX;DICER1;EPHB2;ERBB2;IARS;IGF1R;JUP;MTOR;NCOA2;NOTCH1;PIK3CA;PIK3CB;PRKDC;PTCH1;SOS1		Mammary Neoplasms, Experimental	8.31781e-05	43	ACTG1;ACTN4;AURKA;BRCA1;CASK;CCND1;CD44;CDC42;CDH1;CDK4;CNN3;CSNK2A1;DDR1;EEF1A1;EGFR;ERBB2;ESR1;EZR;FN1;H3F3B;HIF1A;HNRNPA1;HRAS;MTOR;NCOA1;PARP1;PCNA;PHB;PIK3R1;PLK2;PSMA4;PTBP1;PTK2;RAN;RASA1;RB1;RPL6;RPS14;SNRPD3;SRSF2;STAT3;TP53;UBE2I
Hernia, Inguinal	0.0158887	18	ATP7A;BAZ1B;CLIP2;CUL4B;FGD1;FGFR1;GTF2I;HSPG2;INSR;LTBP4;MED12;NIPBL;NOTCH2;NOTCH3;PIK3R1;ROR2;SIN3A;UBA1		Kidney Neoplasm	8.3962e-05	61	ABCA1;ABL1;AGO2;AKT1;APAF1;AURKA;BCOR;BRAF;CCND1;CDH1;CDKN1A;CTNNB1;DICER1;DROSHA;EGF;EGFR;EPHB2;ERBB2;ESR1;EWSR1;GEMIN4;GPC3;GSTP1;HIF1A;HLA-A;HLTF;HUWE1;IGF1R;LRIG1;LRP2;MALAT1;MAPK1;MAPK14;MCM2;MCM6;MDM2;MKI67;MTOR;PAK1;PIK3CA;PIK3CB;POLB;POLR2G;PPARG;PTCH1;PTEN;PTPRU;RAN;REV3L;RPS6;RXRA;SETD2;SMAD3;SVIL;TBC1D9;TP53;TSC2;VDR;VHL;VIM;XPO5
TARSAL-CARPAL COALITION SYNDROME	0.0158887	24	APAF1;ARID1A;CHD6;DNMT1;EPHB2;ERBB2;FN1;GNAS;HIF1A;JUP;LZTS1;MSH2;MSH6;MTR;NF1;POLD1;PTCH1;RB1;SLC12A6;SPAG9;SPG11;TBC1D9;TNKS;ZFYVE26		stage, non-small cell lung cancer	8.53239e-05	17	AKT1;BIRC5;CCND1;CDK2;EGFR;EIF3E;ERBB2;FGFR1;MALAT1;MDM2;MYC;PCNA;RACK1;RRM1;TP53;TRIM28;VDR
Spastic Paraplegia	0.0159255	17	ATP2B4;CCT5;DYNC1H1;HSPD1;IMMT;KIF1A;KIF1C;KIF5A;LYST;PNPLA6;SACS;SPAST;SPG11;TECPR2;VCP;WASHC5;ZFYVE26		Cholangiocarcinoma	8.57089e-05	73	AKT1;APC;ARID1A;BIRC5;BRAF;CALM1;CALM2;CALM3;CCNB1;CCND1;CD44;CDH1;CDK4;CFTR;CKS2;CREB5;CRK;CTNND1;DDR1;DNMT1;EGF;EGFR;EIF4E;EPHB2;ERBB2;ERBIN;ESR1;FANCC;FAT1;FBN2;GNAS;GPC3;GSTP1;HDAC4;HDAC6;HSPD1;IGF2R;KMT2C;KMT2D;LRPPRC;MAPK1;MAPK14;MCL1;MCM3AP;MDM2;MSH2;MYC;NGF;NOS2;NOTCH1;PBRM1;PCNA;PHB;PIK3CA;PIK3CB;PPARG;PPIA;PRKACB;PROM1;PTEN;PTK2;ROBO2;RPLP1;RPSA;SKP2;SLC4A2;SMAD4;SPHK1;STAT1;STAT3;TP53;…
Skin Neoplasms	0.0164706	39	ACO1;AP3B1;APC;ATM;BRCA1;BRCA2;CTNNB1;DICER1;ERBB2;FANCD2;GLI2;GNAS;HDAC6;HERC2;HIF1A;HSPG2;IGF1R;KLHL9;LONP1;LRIG1;MSH2;MSH6;MTOR;MYO5A;NF2;NOTCH1;NOTCH3;OCRL;ODC1;PARP1;PIK3CA;PTCH1;RPA1;STAT3;TIAM1;TP53BP1;USP1;VCAN;VPS13B		Acinar Cell Carcinoma	8.88597e-05	15	APC;BRCA2;CASK;CENPF;CTNNB1;EGFR;ERBB2;FAT1;MIB1;MKI67;MTOR;PIK3CA;PTEN;TP53;VHL
Hyperkyphosis	0.0166647	20	ALMS1;ATP7A;BAZ1B;CLIP2;CUL4B;GNAS;GTF2I;HERC2;HSPG2;NOTCH3;NSD2;OCRL;PIK3CA;POLD1;PTCH1;RAB3GAP2;ROR2;SEC24D;UBA1;WASHC5		Lymphoma, T-Cell, Cutaneous	8.90223e-05	46	AKT1;ARID1A;ATM;AURKA;BRAF;CBL;CCND1;CDK2;CTCF;DNMT1;HDAC1;HDAC2;HDAC3;HDAC6;HDAC9;HLA-C;HSP90AA1;JAG1;JAK1;JAK2;JUN;MCL1;MDM2;MYC;NAV3;NCOA1;NOTCH1;PCM1;PIK3CA;PIK3CB;PLCG1;PLK1;PLS3;PTEN;PTPN11;PTPRG;RARA;RB1;SIRT1;STAT1;STAT3;STAT5B;THBS1;TP53;XPR1;ZEB1
Pediatric failure to thrive	0.0166647	47	AARS;ABCA3;AHDC1;ATP5A1;CHD7;CPS1;CREBBP;DSP;EP300;FASTKD2;FGD1;FGFR1;FLNA;GNAS;HADHA;HCFC1;HIP1;HSD17B4;JAG1;KMT2A;KMT2D;LARS;LEMD3;LPIN2;LRBA;LRPPRC;MARS;MTR;NDUFS1;NIPBL;NNT;NOTCH1;NOTCH2;NSD2;OCRL;ORC1;PEX1;PEX5;PIK3CA;PIK3R1;PLEC;POLG;RAD21;RAI1;RBM10;SMC3;TTC37		Chronic myeloproliferative disorder	9.03402e-05	47	ABCA1;ABL1;AKT1;AR;ASXL1;BCR;CALR;CBL;CENPE;CEP85L;CREBBP;EP300;FGFR1;FLII;FN1;HSPA4;HSPA9;IRS1;IRS2;JAK1;JAK2;MDM2;NES;NIN;NOS2;NPM1;NUP98;ODC1;PAFAH1B1;PIK3CA;PIK3CB;PTPN11;RAC1;RARA;RARS;RASA1;SF3B1;SRSF2;STAT3;STAT5B;TBC1D9;TET1;TET3;TP53;U2AF1;YWHAE;ZMYM2
Neuroendocrine Tumors	0.0166647	32	ACTN4;APC;ARID1A;ATM;ATRX;CTNNB1;DAXX;DNMT1;EPHB2;ERBB2;FLII;FLNA;GNAS;GSN;HIF1A;HSPA4;IGF1R;KIF11;MAP2;MIB1;MKI67;MTOR;NEFM;NOTCH1;NOTCH3;ODC1;PALB2;PIK3CA;PIK3CB;PLCB3;PTPRZ1;VCL		Medullary carcinoma of thyroid	9.12999e-05	48	AKT1;BIRC5;BRAF;CALM1;CALM2;CALM3;CDK5;DOCK11;DYNC1H1;EGF;EGFR;EML4;EPHB2;ERBB2;ESR1;GLI2;GRB2;GSTP1;HRAS;HSP90AA1;HSPA4;HSPA9;JUN;MAPK1;MDM2;MEA1;MIB1;MSH2;MTOR;MYC;NME1;NOS2;NOTCH1;NOTCH2;NOTCH3;PCNA;PIK3CA;PIK3CB;PNP;PROM1;PTCH1;PTPRF;SHH;SRC;STAT3;TP53;VHL;XPO5
Afro-textured hair	0.0166647	5	ATP7A;DSP;JUP;KANK2;TTC37		Merkel cell carcinoma	9.34832e-05	29	AKT1;APC;BIRC5;BRAF;CCND1;DNER;EGFR;ERBB2;GLI3;GPC3;HLA-C;HRAS;HSPA4;HSPA8;MCL1;MCM4;MCM6;MCM7;MDM2;MYC;NCAM1;PIK3CA;PIK3CB;PTEN;PTPRG;RB1;SF3B6;SMAD4;TP53
Benign symmetrical lipomatosis	0.0166647	5	MFN2;MTOR;PIK3CA;PIK3CB;PNPLA6		Cyst	9.35951e-05	35	ADCY6;AR;BIRC5;BRCA1;CAV1;CC2D2A;CD44;CDC42;CDH1;CFTR;DICER1;EGF;ESR1;FAT1;GNAS;KIF3A;LAMA1;MCL1;OCRL;PAK1;PCM1;PCNA;PIK3C2A;PKD1;PLK1;PRKD1;PTCH1;PTEN;RAC1;RAD9A;SDC1;SHH;TSC2;VDR;VHL
Kinky hair texture	0.0166647	5	ATP7A;DSP;JUP;KANK2;TTC37		Conventional (Clear Cell) Renal Cell Carcinoma	9.37446e-05	84	ACO1;AKT1;ANXA2;APAF1;AR;ARID1A;ATM;BIRC5;CALM1;CALM2;CALM3;CAPRIN1;CAV1;CCND1;CDH1;CDKN1A;CMAS;DCLK1;DNMT1;EGF;EGFR;ELN;EPHB2;FBN2;FN1;GNAS;GPC3;HDAC9;HIF1A;HLA-A;HLA-C;HNRNPA1;HNRNPA2B1;IGF1R;INTS1;JAG1;KAT2B;KDM5C;KMT2B;KMT2D;LRP2;LSAMP;MALAT1;MAPK1;MAPK8;MDM2;MLH1;MMRN1;MSH2;MTOR;MYC;MYL12A;NCL;NOTCH1;NR3C1;ORC2;PBRM1;PCNA;PIK3CA;PIK3CB;PLK1;POLR2A;PPARG;PPIA;PROM1;PTEN;PTTG1;RBX1;ROCK1;ROR2;…
Nappy hair texture	0.0166647	5	ATP7A;DSP;JUP;KANK2;TTC37		Microcephaly	9.40836e-05	42	ARFGEF2;ASPM;ATM;ATR;BRCA1;BUB1B;CASK;CDC6;CDK5;CDK5RAP2;CENPF;CHEK1;CLP1;CTNNB1;DIAPH1;DYNC1H1;EFTUD2;EOMES;FLNA;IGF1R;KAT6A;KIF11;KIF14;KIF5C;KNL1;MAPK8;NES;ORC1;ORC4;PAFAH1B1;PCNT;PHGDH;PIK3R1;PLK1;POLE;PTCH1;RASA1;SIN3A;SMC3;TRAPPC9;UPF3B;VPS13B
Skull defect	0.0166647	5	BMS1;GRIP1;HSPG2;NOTCH1;NSD2		Decreased tendon reflex	0.000100109	36	ABCA1;AR;ATP7A;COX6A1;DNMT1;DYNC1H1;FBN1;FIG4;FLII;FLNC;FMR1;FUS;GARS;HK1;HSPG2;IARS2;KARS;KIF1A;KIF1B;LRP4;LYST;MFN2;NDUFA1;NDUFB3;NDUFB9;NDUFS1;NDUFS4;PEX1;PEX5;PNPLA6;POLG;RAI1;SYNJ1;SZT2;TBK1;VPS13A
Spastic paraplegia 10, autosomal dominant	0.0166647	5	KIF1B;KIF5A;KIF5B;KIF5C;SPAST		Epithelial cyst	0.000100109	6	APC;CFTR;MTOR;PKD1;TP53;VDR
Wooly hair	0.0166647	5	ATP7A;DSP;JUP;KANK2;TTC37		Multiple lipomata	0.000100109	6	AKT1;AP2S1;APC;MFN2;PTEN;RB1
contralateral breast cancer	0.0166647	5	ATM;BRCA1;BRCA2;ERBB2;PALB2		Pertussis	0.000100109	6	CALM1;CALM2;CALM3;HLA-C;VDR;WDTC1
Everted lower lip vermilion	0.0166647	12	ATRX;BAZ1B;CLIP2;CUL7;FGD1;GTF2I;HSPG2;IGF1R;OBSL1;PLXND1;RAB3GAP2;REV3L		Unilateral Breast Neoplasms	0.000100109	6	ATM;BRCA1;BRCA2;ERBB2;PALB2;TP53
Protruding lower lip	0.0166647	12	ATRX;BAZ1B;CLIP2;CUL7;FGD1;GTF2I;HSPG2;IGF1R;OBSL1;PLXND1;RAB3GAP2;REV3L		Periventricular neuronal heterotopia	0.000101764	7	ANKRD11;ARFGEF2;DCHS1;FAT4;FLNA;FMR1;KAT6B
Aarskog syndrome	0.0166647	4	ARHGEF2;FGD1;GLI3;SOS1		Rectal Carcinoma	0.000105648	50	ABCC4;AKT1;APC;AR;BLM;BRAF;CCND1;CD44;CDKN1A;CTNNB1;EGF;EGFR;EIF4E;ERBB2;ESR1;GMNN;GSTP1;H2AFX;HIF1A;IQGAP2;IRS1;IRS2;MIB1;MKI67;MLH1;MSH2;MSH6;MYC;NOS2;PIK3CA;PIK3CB;PLK1;PPARG;PRDX1;PROM1;PTEN;RAN;RRM1;SETD2;SMAD2;SMAD3;SMAD4;STAT3;TBC1D9;TIMP2;TP53;TP53BP1;VDR;VIM;YBX1
Broad face	0.0166647	4	FLNA;FLNB;PTCH1;RAI1		Peutz-Jeghers Syndrome	0.000105648	20	AKT1;APC;BRCA1;BRCA2;BUB1;CTNNB1;EGFR;FNDC3A;HSP90AA1;MARK4;MSH6;MTOR;ODC1;PPFIA1;PTEN;SMAD2;SMAD4;SMARCA4;TP53;TSC2
Congenital kyphosis	0.0166647	4	FBN1;PARP1;TSC2;UTRN		Adenocarcinoma of rectum	0.000105648	14	ABCC4;APC;CDKN1A;EGFR;FN1;H2AFX;HIF1A;MIB1;MKI67;MSH2;MYC;SETD2;TP53;TP53BP1
Fleshy earlobes	0.0166647	4	EFTUD2;FGD1;NOTCH2;PIK3CA		Congenital hypoplasia of kidney	0.000105648	14	ARVCF;ATRX;BCOR;DCHS1;ELN;GLI3;GRIP1;JAG1;KIF14;LRP4;PTEN;ROBO2;SEC24C;TXNL4A
High anterior hairline	0.0166647	4	FGD1;NSD2;SIN3A;SOS1		Esophageal Atresia	0.000105648	14	BRCA2;CHD7;EFTUD2;FANCA;FANCC;FANCD2;FANCG;FANCI;GLI3;GSTP1;ITGA6;PLEC;PTEN;SHH
Hypophonia	0.0166647	4	DCTN1;HSPG2;SYNJ1;TRIM37		Leukemia, Plasma Cell	0.000106351	16	BCR;BRAF;CCND1;CKS1B;HLA-A;MDM2;MLH1;MYC;NCAM1;NES;NSD2;PCNA;PSMB5;PTEN;RB1;TP53
Malignant neoplasm of fallopian tube	0.0166647	4	BRCA1;BRCA2;NBR1;NF2		Single tumor	0.000106351	16	AKT1;AMER1;BRAF;CDK2;CDKN1A;EGFR;ERBB2;ESR1;EWSR1;KDM5C;MSH2;NOTCH2;PIK3C2B;PIK3CA;PTEN;TP53
Onychomycosis	0.0166647	4	LYST;POLR2A;TNPO3;VPS13B		Convex nasal bridge	0.000106351	21	AFF2;ARVCF;BCOR;CASK;CENPF;HSPG2;KAT6A;KAT6B;MED12;PCNT;POLR1A;RAB3GAP2;RB1;SEC23A;SEC24C;SF3B4;SIN3A;SMAD4;SMC1A;SMC3;TXNL4A
Paraparesis	0.0166647	4	ATP13A2;HSPD1;NF1;SPAST		Prominent nasal bridge	0.000106351	21	AFF2;ARVCF;BCOR;CASK;CENPF;HSPG2;KAT6A;KAT6B;MED12;PCNT;POLR1A;RAB3GAP2;RB1;SEC23A;SEC24C;SF3B4;SIN3A;SMAD4;SMC1A;SMC3;TXNL4A
Refractory anemia with ring sideroblasts associated with marked thrombocytosis	0.0166647	4	ASXL1;CDK13;RARS;SF3B1		Progressive Neoplastic Disease	0.000115737	33	ABL1;AKT1;ALMS1;AR;ATF7IP;BCR;BRAF;BRCA1;CDK4;EGFR;ERBB2;ESR1;FBN1;GSK3B;HDAC4;HLA-C;IGF1R;MCL1;MDM2;MLH1;MMRN1;MYC;NBR1;NOTCH1;PIK3CA;PPIA;PROM1;SDC1;SETD2;SF3B1;SOD1;STAT3;TP53
SHORT syndrome	0.0166647	4	IGF1R;PIK3CA;PIK3CB;PIK3R1		Progressive cGVHD	0.000115737	33	ABL1;AKT1;ALMS1;AR;ATF7IP;BCR;BRAF;BRCA1;CDK4;EGFR;ERBB2;ESR1;FBN1;GSK3B;HDAC4;HLA-C;IGF1R;MCL1;MDM2;MLH1;MMRN1;MYC;NBR1;NOTCH1;PIK3CA;PPIA;PROM1;SDC1;SETD2;SF3B1;SOD1;STAT3;TP53
Voice Fatigue	0.0166647	4	DCTN1;HSPG2;SYNJ1;TRIM37		Hematological Disease	0.000119181	36	ABL1;AKT1;AR;ASXL1;ATRX;BCR;CREBBP;CTNNB1;EGFR;EIF4E;EP300;FANCA;FANCC;FGFR1;FIG4;GSTP1;HLA-A;HNRNPK;HSPA9;IGF1R;JAK2;KMT2A;MSH2;MTR;PAFAH1B1;PBX1;PCNA;RFC1;RPS19;SEC23B;SF3B1;TBC1D9;TP53;U2AF1;YBX1;YWHAE
Juvenile Myelomonocytic Leukemia	0.0169172	18	ABL1;AKAP12;ASXL1;BCR;EPHB2;KDM1A;KMT2A;MYH9;NF1;NUP98;PIK3CA;PIK3CB;PIK3R1;PTPN11;SF3B1;SOS1;STAT3;STAT5B		Neoplasm Invasiveness	0.000120894	40	ACO1;ANXA2;BCAR1;BRAF;BRCA1;BRCA2;CALR;CDH1;CTNNB1;EEF2;EGF;EGFR;ESR1;FN1;FTL;GSTP1;HIF1A;HRAS;KDM1A;LDHB;MALAT1;MAPK1;MYLK;NCAM1;NME1;NOS2;PIK3CA;PTEN;PTK2;RELA;RPSA;SORL1;SP1;SRC;TLN1;TP53;TXN;VDR;ZBTB16;ZEB1
Phyllodes Tumor	0.0174406	11	ERBB2;FLNA;HIF1A;IGF1R;KMT2D;MED12;MTOR;PIK3CA;PIK3CB;SCAF11;SETD2		Vaccinia	0.000120894	40	ARHGEF2;ATP2C1;BRAF;CFTR;CRK;DICER1;EGF;EGFR;EIF2AK2;EPHB2;ERBB2;ESR1;FLNB;HLA-A;HLA-C;IMMT;MAPK1;MAPK14;MAPK8;MCL1;MPRIP;NGF;NOS2;PIK3CA;PIK3CB;PNP;POLR3B;PRPF19;PTPN11;RAC1;RPA1;RPSA;SERPINH1;SP1;SSB;STAT1;STAT5B;TBC1D9;TP53;VIM
Congenital Heart Defects	0.0174406	34	ARID1A;BAG6;CHD7;CREBBP;DNMT1;DSP;FANCD2;GRIP1;HIF1A;JAG1;JARID2;MAML3;MED12;MED13;MED13L;MEGF8;MTHFD1;MTR;MYLK;NF1;NIPBL;NOTCH1;OPA1;PEX5;PRRC2A;PTPN11;RAI1;RFC1;SALL4;SH3PXD2B;SMARCA1;SOS1;TBC1D9;ZBTB16		Female Breast Carcinoma	0.000121806	17	AR;ATM;BRCA1;BRCA2;CCND1;ERBB2;ESR1;ESYT1;MLH1;MYC;PALB2;PIK3CA;PTEN;RPA2;TP53;VDR;ZNF217
Retinoblastoma	0.0175557	59	ABL1;AKAP12;APC;ATM;ATR;BCOR;BCORL1;BRCA1;BRCA2;CASK;CTCF;CTNNB1;DDX1;DDX5;DICER1;DNMT1;EP400;EPHB2;ERBB2;EWSR1;FASN;FBXW11;FGFR1;HIF1A;HSPA4;IGF2R;KDM4A;KDM5A;KIF13A;KIF14;KMT2D;MCM2;MIB1;MKI67;MSH2;MTOR;MTR;NF1;NOS2;NUP153;NUP205;NUP214;PIK3CA;PIK3CB;POLD1;PPP1CA;PRDM16;RB1;RB1CC1;RBBP6;RBL2;RFC1;SIN3A;SLU7;SMARCA1;SMARCA4;STAT3;TIAM1;TSC2		Glucocorticoid Receptor Deficiency	0.000121806	17	ANXA2;HDAC2;JAG1;JUN;KMT2A;MAPK8;MCL1;MSH6;NCOA2;NR3C1;PIK3CA;PIK3CB;SMARCA1;SRC;SRSF9;TBC1D9;TOP2A
Failure to thrive in infancy	0.0176763	9	BAZ1B;CLIP2;FGFR1;FLII;GTF2I;HERC2;PTPN11;RAI1;UBA1		BREAST CANCER 3	0.000121869	9	BRCA1;BRCA2;ERBB2;ESR1;HIF1A;HMGA1;PIK3CA;RAD21;TP53
Pointed chin	0.0176763	9	ACTG1;ANKRD11;BAZ1B;BCR;CLIP2;CUL7;FLNA;GTF2I;OBSL1		Tobacco Use Disorder	0.000122617	448	ABCA1;ABCC4;ACACA;ADAMTS9;ADAR;ADGRL3;ADGRV1;AFDN;AGL;AKAP13;AKAP9;ALMS1;ALS2;AMPH;ANK2;ANK3;ANKIB1;ANKRD12;ANKRD17;ANXA2;AP1G1;AP3B1;AP3D1;APAF1;APBB1;AQR;ARFGEF1;ARHGEF12;ARID1B;ARVCF;ASCC3;ATG2A;ATP2B4;ATP9A;AURKA;AXIN1;BARD1;BAZ1A;BCL9;BCR;BDP1;BOD1L1;BRAF;BRCA1;BRD1;BTRC;CABIN1;CAD;CALM2;CBL;CCDC88A;CDC42BPB;CDC45;CDH2;CDK5;CDON;CECR2;CELSR1;CEP170;CEP192;CEP295;CEP350;CEP85L;CHD1;CHD2;CHD6;…
Small testicle	0.0177092	13	ATRX;CHD7;CUL4B;CUL7;FBN1;FGFR1;GLI2;GLI3;HSPG2;MAP3K1;PHGDH;POLR3B;USP9Y		Early gastric cancer	0.000123021	13	APC;CD44;EGFR;ERBB2;MYC;PCNA;PER1;PLCG1;PPIA;PTEN;ROCK1;SHH;TP53
Mental impairment	0.0177092	20	ATR;CENPE;FBN1;FGD1;FLNA;GBA2;GNAS;INSR;KIAA1109;OCRL;PCNT;PEX1;PEX5;PIK3CA;POLG;SEC23B;SPG11;TTC37;UBA1;ZFYVE26		Familial multiple trichoepitheliomata	0.000128457	32	AKAP12;AKT1;APC;ARID1A;BRCA2;CCND1;CDH1;CDK4;EGF;EGFR;EIF4A2;EIF4E;EIF4G1;ERBB2;ESR1;GSN;GSTP1;JMJD1C;MDM2;MEGF8;MTOR;MYC;PIK3CA;PIK3CB;PPARG;RAC1;RFC3;RPS6KB1;SF3B6;SMAD4;TP53;VDR
Dysmorphic features	0.0177092	10	ATR;CPT2;FGFR1;HTT;IGF1R;JARID2;NF1;PPP2R5D;TAF1;UBE3B		HIV Infections	0.00013012	137	ABCA1;ABCC4;ABL1;ACTG1;ADAMTS9;ADAR;AKT1;ANXA2;ARHGEF2;BRAF;CCNB1;CCT3;CCT5;CCT7;CDC42;CDK2;CDK9;CDKN1A;CNOT1;CREB1;CRK;CUL5;DCAF1;DLL1;DNER;EGFR;EIF2AK2;EIF3B;EIF4A1;EOMES;FLNA;FYN;GJA1;GLI2;GOLGB1;HDAC6;HIF1A;HLA-A;HLA-C;HRAS;HSP90AA1;HSPA4;HSPA9;HSPD1;HSPE1;HSPH1;IGF2R;ILF2;IPO7;JUN;KARS;KPNB1;LCK;LRP2;MAPK1;MAPK14;MAPK8;MCM7;MDM2;MYC;NCAM1;NCAPG2;NCL;NCOR2;NDUFA6;NOS2;NOTCH2;NR3C1;NUP153;NUP2…
Ovarian Serous Adenocarcinoma	0.0177092	10	APC;BRCA1;BRCA2;BUB1;GSN;NF1;NOTCH3;PIK3CA;PKN1;RSF1		Keloid	0.000133115	35	AKT1;ANXA2;APC;CREBBP;DDR1;EGFR;ELN;EP300;FN1;FTL;HIF1A;HLA-A;HLA-C;IGF1R;JAG1;MAPK8;MMRN1;NR3C1;PHGDH;PHLPP2;PIK3CA;PIK3CB;PPARG;PRDX1;PTEN;RAN;RPS18;SMAD2;SMAD3;STAT3;TAGLN;TP53;VCAN;VDR;VIM
Abnormality of pulmonary valve	0.0180127	7	ARVCF;KAT6B;NOTCH1;PTPN11;SEC24C;SOS1;SOS2		Mammary adenocarcinoma	0.000133115	15	CCND1;CD44;EGF;EIF2AK2;ERBB2;ESR1;FN1;HIF1A;HRAS;PARP1;PIK3CA;PIK3CB;PTPRF;TP53;YBX1
Lymphoid neoplasm	0.0180127	7	ATM;BRCA1;FGFR1;NOTCH1;STAT5B;TCP1;XRCC5		Seckel syndrome	0.000133115	15	ATM;ATR;ATRIP;BRCA1;CENPE;CHEK1;CRK;DNA2;DNMT1;H2AFX;MAPK1;MAPK14;NIN;ORC1;PCNT
Prominent back of the head	0.0180127	7	ATP7A;FLNA;FLNB;GLI3;NOTCH2;TSC2;WASHC5		Hypertrophic Cardiomyopathy	0.000133299	54	AR;ATM;ATP5E;BRAF;BRCA1;C12orf57;CAV1;ELN;EPHB2;ESR1;FASN;FASTKD2;FHOD3;FN1;GJA1;GNAS;HDAC2;HIF1A;HLA-A;HLA-C;HRAS;HSPD1;IARS;IARS2;IGF1R;INS-IGF2;KDM4A;MAPK1;MRPL3;MYC;MYLK;NCAM1;NDUFA1;NDUFB3;NDUFB9;NDUFS1;NDUFS4;NF1;NME1;OBSCN;OPA1;PIK3CA;PIK3CB;PKP2;PPARG;PTPN11;PTTG1;SMARCA4;SOS1;TBCA;TIMP2;TP53;VCL;YY1
Prominent occiput	0.0180127	7	ATP7A;FLNA;FLNB;GLI3;NOTCH2;TSC2;WASHC5		Salivary duct carcinoma	0.000138568	12	AR;BRAF;EGFR;ERBB2;ESR1;NOS2;NUMA1;PCNA;PIK3CA;PIK3CB;PTEN;TP53
Aplasia/Hypoplasia of the abdominal wall musculature	0.0182198	6	ATP7A;FLNB;KAT6B;PTPN11;SOS1;SOS2		Ameloblastoma	0.000138568	19	AKT1;AMBN;APC;BRAF;CD44;CTNNB1;DDR1;EGF;EGFR;EWSR1;GNAS;HSPG2;MTOR;NOTCH1;PTCH1;SHH;TIMP2;TP53;VIM
Apraxia, Developmental Verbal	0.0182198	6	BCAR1;CSE1L;CTNND1;ERC1;LRP1;TSC2		Nerve Sheath Tumors	0.000138568	19	AR;AURKA;BRAF;CD44;EGF;EGFR;EPHB2;ERBB2;FN1;IGF1R;MAPK1;MDM2;NES;NF1;NF2;PTEN;STAT3;TOP2A;TP53
Decreased pain sensation	0.0182198	6	ABCA1;FLII;HERC2;NOTCH3;OPA1;RAI1		Muscle Spasticity	0.000138568	59	AARS;ADAR;ALS2;ANK3;ATM;ATP13A2;ATP7A;ATRX;BAZ1B;CASK;CLIP2;CLP1;CNR1;COL4A2;DCTN1;DNMT1;ELN;FIG4;FTL;FUS;GARS;GBA2;GJA1;GRIA2;GTF2I;HLA-C;HNRNPA1;HTT;IFT122;KDM5C;KIF1C;NDUFA1;NDUFB3;NDUFB9;NDUFS1;NDUFS4;NOTCH3;NPC2;OPA1;PCLO;PEX1;PEX5;PLCB1;PLCD1;PNPLA6;POLA1;POLR3A;POLR3B;RAB3GAP2;RFC2;RPA1;SACS;SOD1;SPAST;SPG11;TBK1;UNC13A;VCP;ZNF592
Fallopian Tube Carcinoma	0.0182198	6	ACTN4;BRCA1;BRCA2;ERBB2;NBR1;NF2		Malignant Fibrous Histiocytoma	0.000139035	22	CDK4;EGFR;EZR;HLA-A;HRAS;IGF1R;MDM2;MFHAS1;MIB1;MKI67;MSH2;MTOR;NOS2;PIK3CA;PIK3CB;PTCH1;PTEN;RB1;SRC;STAT1;TBC1D9;TP53
Hamartomatous polyp	0.0182198	6	APC;CTNNB1;MSH3;MSH6;PIK3CA;SEC23B		Heartburn	0.000140537	29	ATF4;ATRX;BRAF;CAV1;CDC6;CHD7;CTBP1;EFNB2;ELN;FLII;FLNA;FMR1;HRAS;KIF1A;LTBP4;MAPK8;NIPBL;NSD2;ORC1;ORC4;PIK3CA;PIK3CB;RAD21;RAI1;SALL1;SMC1A;SMC3;TECPR2;ZEB1
Overactive bladder syndrome	0.0182198	6	HSPD1;KIF5A;SACS;SPAST;WASHC5;ZFYVE26		Thrombocythemia, Essential	0.000141121	31	ABL1;AR;ASXL1;BCR;CALR;CBL;CCND1;CTNNB1;DAAM1;FLII;H2AFX;HBS1L;HDAC6;HDAC9;HSPA4;IRS2;JAK1;JAK2;MDM2;MYC;NR3C1;PCNA;RARS;SETD2;SMAD4;STAT1;STAT3;STAT5B;THBS1;TP53;WDTC1
Platelet Storage Pool Deficiency	0.0182198	6	ABCC4;AP3B1;AP3D1;DOCK7;LYST;WDTC1		Failure to gain weight	0.000141121	73	AARS;ABCA3;AHDC1;ATP5A1;BRAF;CDC6;CDON;CFTR;CHD7;CPS1;CREBBP;CTBP1;DKC1;DPM1;DSP;EGFR;EP300;EXOSC8;FASTKD2;FGD1;FGFR1;FLNA;FMR1;GJA1;GNAS;HADHA;HCFC1;HRAS;HSD17B4;JAG1;KMT2A;KMT2D;LARS;LCK;LEMD3;LPIN2;LRBA;LRPPRC;MARS;MPDU1;MRPL3;MTR;NDUFA1;NDUFB3;NDUFB9;NDUFS1;NDUFS4;NIPBL;NME1;NNT;NOTCH1;NOTCH2;NSD2;OCRL;ORC1;ORC4;PEX1;PEX5;PIK3CA;PIK3R1;PLEC;PNP;POLG;RAD21;RAI1;RBM10;RPS19;SMAD4;SMARCA2;SMC1A;…
Proximally placed thumbs	0.0182198	6	FLNA;NIPBL;RAD21;SIN3A;SMC3;UBA1		Hamartomatous polyp	0.000142532	10	AKT1;APC;CTNNB1;MSH3;MSH6;PIK3CA;PTEN;SEC23B;SMAD4;TP53
Sphincter disturbances	0.0182198	6	HSPD1;KIF1A;KIF5A;SPAST;WASHC5;ZFYVE26		Non-infiltrating lobular carcinoma	0.000142532	10	BRCA1;CDH1;ERBB2;ESR1;MAP3K1;MLH1;MSH2;NME1;PIK3CA;TP53
Exanthema	0.0188688	41	APC;ATM;BCR;BRCA1;BRCA2;CREBBP;CTCF;EEF2;ERBB2;FANCD2;FBN1;FBXO11;FN1;GNAS;GSN;HADHA;HSPA8;HSPG2;IGF1R;INTS2;KMT2A;LRP1;LRP2;MSH2;MSH6;MYO9B;NES;NF1;NOTCH1;PIK3CA;PIK3CB;PIK3R1;PTCH1;PTPN11;RB1;SPTAN1;STAT1;STAT3;TOP2A;TSC2;ZFHX3		Radiation Damage	0.000142532	10	ATM;EGF;FANCD2;H2AFX;POLB;PRDX1;PRKDC;SIRT1;TP53;WDTC1
Malignant tumor of colon	0.0198186	167	ABCA1;ACACA;ACTG1;AFDN;APAF1;APC;APC2;ARHGEF17;ATM;ATP2B4;ATP7A;ATR;BCAR1;BCL9;BIRC6;BRCA1;BRCA2;BUB1;CASP8AP2;CCDC88A;CDH2;CEBPZ;CHAF1A;CHD7;CREBBP;CSE1L;CTCF;CTNNA1;CTNNB1;CTNND1;CUL3;CYFIP2;DCAF1;DDB1;DDX5;DHX32;DIAPH1;DICER1;DNMT1;ENC1;EP300;EPHA3;EPHA7;EPHB2;ERBB2;FASN;FBN2;FBXW11;FEM1B;FN1;FUS;GIT1;GLI2;GLI3;GNAS;GSN;HCFC1;HDAC2;HDAC3;HDAC6;HECW2;HIF1A;HIP1;HLTF;HSPA4;HSPA8;HSPA9;IGF1R;IGF2…		genital abnormal	0.000142532	10	ETFA;RPL11;RPL26;RPL35A;RPS17;RPS19;RPS24;RPS28;RPS29;RPS7
Contracture of joint of hand	0.020363	8	BCOR;HSPG2;MED12;ORC1;PEX5;PHGDH;ROR2;ZNF592		reproductive system abnormality	0.000142532	10	ETFA;RPL11;RPL26;RPL35A;RPS17;RPS19;RPS24;RPS28;RPS29;RPS7
Pilocytic Astrocytoma	0.0205058	18	AKAP12;EPHB2;ERBB2;FGFR1;FN1;HIF1A;MIB1;MKI67;MPRIP;MTOR;NF1;NOTCH2;PARP1;PHF20;PIK3CA;PIK3CB;PTPN11;ZEB1		Steroid Sulfatase Deficiency Disease	0.00014326	26	AKT1;BRAF;BRCA1;EGF;EGFR;ERBB2;EWSR1;EZR;FN1;HIF1A;MAPK8;MDM2;MIB1;MKI67;MLH1;MSH2;MYC;PARP1;PTEN;RARA;SETD2;TBC1D9;TOP2A;TP53;VIM;WDTC1
Amyotrophic Lateral Sclerosis	0.0206315	75	ABCA1;ABL1;ADAR;ALS2;AMPH;APAF1;ASPM;ATP7A;BRCA1;CABIN1;CAPN1;CCDC88A;CELSR3;CHAF1A;CLIP2;COL4A2;CREBBP;CTR9;DCTN1;DDX46;DHX16;DNMT1;EIF4G2;EPHA3;EWSR1;EXOC4;FIG4;FNDC3A;FUS;GARS;GEMIN4;GLI3;HDAC2;HDAC6;HECW1;HIF1A;HSPA4;HTT;KIF1B;KIFAP3;MAP1B;MFN2;MTOR;NEFM;NES;NOS2;NOTCH1;NUP153;NUP214;NUP98;OSBP;PARP1;PHGDH;PIK3R4;PKN1;PLCD1;PNPLA6;PSMD2;RAB3GAP2;RHOT1;RTN4;SETX;SHROOM3;SLU7;SOS1;SPAST;SPG11;S…		Pediatric failure to thrive	0.000143366	75	AARS;ABCA3;AHDC1;ATP5A1;BRAF;CDC6;CDON;CFTR;CHD7;CPS1;CREBBP;CTBP1;DKC1;DPM1;DSP;EGFR;EP300;EXOSC8;FASTKD2;FGD1;FGFR1;FLNA;FMR1;GJA1;GNAS;HADHA;HCFC1;HIP1;HRAS;HSD17B4;JAG1;KMT2A;KMT2D;LARS;LCK;LEMD3;LPIN2;LRBA;LRPPRC;MARS;MPDU1;MRPL3;MTR;NDUFA1;NDUFB3;NDUFB9;NDUFS1;NDUFS4;NIPBL;NME1;NNT;NOTCH1;NOTCH2;NSD2;OCRL;ORC1;ORC4;PAFAH1B1;PEX1;PEX5;PIK3CA;PIK3R1;PLEC;PNP;POLG;RAD21;RAI1;RBM10;RPS19;SMAD4;…
Glucocorticoid Receptor Deficiency	0.0208405	10	HDAC2;JAG1;KMT2A;MSH6;NCOA2;PIK3CA;PIK3CB;SMARCA1;TBC1D9;TOP2A		Breast cancer, lobular	0.000145183	11	APC;BRCA1;BRCA2;CDH1;CTNND1;CTNND2;EGFR;ERBB2;PIK3CA;TBC1D9;TP53
Turcot syndrome (disorder)	0.0208405	10	APC;ARID1A;CTNNB1;HIF1A;IGF2R;MSH2;MSH3;MSH6;NF1;PIK3CA		Colorectal cancer metastatic	0.000145183	37	AKT1;AURKA;AURKB;BRAF;BRD8;CCND1;CD44;CDH1;DICER1;EGF;EGFR;EPHB2;ERBB2;GSTP1;HIF1A;HSP90AA1;IGF1R;KARS;MAPK1;MAPK8IP2;MGEA5;MSH3;MYO5A;NCAM1;NOTCH1;PIK3CA;PIK3CB;PRKD1;PROM1;PTEN;RRM1;SMAD4;STAT3;THBS1;TOP2A;TP53;TP53BP1
Hepatomegaly	0.0208405	33	ABCA1;AGL;ALMS1;AP3B1;CHD7;CPT2;EWSR1;FASTKD2;FBN1;HADHA;HSD17B4;IFT140;IFT172;KAT6B;LARS;LPIN2;LRP5;LYST;MARS;MCM4;MFN2;PEX1;PEX5;PHKA2;PHKB;POLD1;POLG;PTPN11;SOS1;SOS2;TRIM37;TTC37;XPR1		Epithelioma	0.000148614	54	ABCA1;AKT1;ANXA2;AR;BRAF;BRCA1;CCNB1;CD44;CDH1;CTNNB1;DAXX;EGF;EGFR;EIF3E;ERBB2;ESR1;EWSR1;FASN;FBXW11;FN1;GPC3;GTF2I;HDAC3;HEATR6;HIP1;HLA-C;HMGA1;HRAS;HSPD1;IGF1R;KRT8;LEF1;MSH2;MYC;NBR1;NCOA3;NGF;NOTCH3;ODC1;PCNA;PIK3CA;PIK3CB;PPARG;PROM1;PTEN;SDC1;SP1;TBC1D9;TIMP2;TP53;TSC2;VHL;VIM;ZEB1
Central Nervous System Neoplasms	0.020926	15	APC;ATRX;BCOR;BRCA2;DDR1;EPHB2;ERBB2;FGFR1;MSH2;MTR;NES;NF1;NF2;PARP1;RFC1		Graft-vs-Host Disease	0.000155374	47	ACACA;AKAP13;APC;APEX1;ARHGEF2;AURKA;CABIN1;CAV1;DHX15;DNMT1;EGFR;ESR1;FANCD2;FEN1;FN1;GSTP1;HLA-A;HLA-C;HSPA4;HSPA8;JAK2;KAT5;LIG3;MAPK1;NCAM1;NOS2;NPM1;NR3C1;PARP1;PCNA;POLB;POLD1;POLE;RELA;RFC1;RFC2;RFC3;RFC4;RFC5;RPSA;SMAD3;SPTBN1;STAT1;STAT3;TP53;VDR;WNK1
Nystagmus	0.020926	44	AARS;ALMS1;AP3B1;ARID1A;ATM;ATP5A1;CASK;CHD7;EEF2;FGFR1;GNAS;HSD17B4;HSPD1;IARS2;IFT140;IFT172;KIAA0556;LAMB2;LYST;MYO5A;NDUFS1;NIPBL;NSD2;OCRL;OPA1;PEX1;PEX5;PHGDH;PLXNA2;PNPLA6;POLG;PRPF6;PRPF8;RARS;RNF216;SACS;SIN3A;SMARCA4;SNRNP200;SPAST;SYNE1;UBE3A;ZNF423;ZNF592		Chronic leukemia (category)	0.00016183	14	ABL1;ASXL1;ATM;BCR;CCND1;DLL1;JAK2;NPM1;PAFAH1B1;SF3B1;SRC;TBC1D9;YWHAE;YY1
Lumbar lordosis	0.020926	9	BCOR;FBN1;HSPG2;MED12;MFN2;PLEC;RAB3GAP2;SMARCAL1;VCP		Therapy-related myelodysplastic syndrome	0.00016183	14	ASXL1;BCR;CREBBP;EIF4E;HDAC9;KAT6A;KAT6B;KMT2A;NUP98;PAFAH1B1;PTPN11;SF3B1;TP53;YWHAE
Pyloric Stenosis	0.020926	9	BCOR;FIG4;FLNA;LTBP4;MED12;NIPBL;PEX1;PEX5;PPP2R5D		Fragile X Syndrome	0.000166927	27	AFF2;AR;BCR;CTCF;CYFIP2;DICER1;EIF4E;FMR1;FXR1;FXR2;KIAA1109;MLH1;MSH2;NF1;PIK3CA;PIK3CB;PKP4;PTBP1;PTEN;RAI1;RPS6KB1;SIRT1;SLC1A2;SOD1;SRRM2;ST8SIA4;TDRD3
Malignant neoplasm of endometrium	0.0214231	56	AFDN;APC;ARID1A;ATAD2;ATM;BRCA1;BRCA2;CREBBP;CTCF;CTNNB1;CTNND1;DDR1;DICER1;DROSHA;EP300;EPHB2;ERBB2;FANCD2;HIF1A;HSD17B4;IGF1R;INSR;JAK1;KDM4A;KDM4B;LLGL1;LRPPRC;MAP3K1;MSH2;MSH3;MSH6;MTOR;NBR1;NCOA2;NOTCH1;NRIP1;PER1;PIK3CA;PIK3CB;PIK3R1;PKN1;PLXNA1;POLD1;POLE;PPP2R1A;PRKDC;RB1;SALL4;SREBF1;STAT3;TBC1D9;TNKS2;TSHZ1;VCAN;ZEB1;ZFHX3		Respiratory syncytial virus (RSV) infection in conditions classified elsewhere and of unspecified site	0.000167766	41	ABCA1;ABCA3;ARHGEF2;AURKA;BRCA1;CDK2;CDK9;CFTR;CRK;DHX58;EGFR;EIF2AK2;EPHA3;EPHB2;FASN;GLI3;HIF1A;HLA-A;HLA-C;MAPK1;MAPK14;MCL1;MTOR;NCAM1;NCL;NGF;NOS2;NR3C1;NUP214;PCNA;PPARG;PTPN11;RELA;RPSA;SOD1;STAT1;TP53;TXN;VDR;WDHD1;WNK1
Uterine Corpus Cancer	0.0214231	56	AFDN;APC;ARID1A;ATAD2;ATM;BRCA1;BRCA2;CREBBP;CTCF;CTNNB1;CTNND1;DDR1;DICER1;DROSHA;EP300;EPHB2;ERBB2;FANCD2;HIF1A;HSD17B4;IGF1R;INSR;JAK1;KDM4A;KDM4B;LLGL1;LRPPRC;MAP3K1;MSH2;MSH3;MSH6;MTOR;NBR1;NCOA2;NOTCH1;NRIP1;PER1;PIK3CA;PIK3CB;PIK3R1;PKN1;PLXNA1;POLD1;POLE;PPP2R1A;PRKDC;RB1;SALL4;SREBF1;STAT3;TBC1D9;TNKS2;TSHZ1;VCAN;ZEB1;ZFHX3		Carcinoma of Male Breast	0.000170703	17	AR;BRCA1;BRCA2;CCND1;CHEK1;EGFR;ERBB2;ESR1;GSTP1;HIF1A;MIB1;MKI67;PALB2;PIK3CA;PTEN;SEM1;TP53
Hepatocarcinogenesis	0.0217596	57	AKAP12;APC;BCAR1;CAD;CPS1;CREBBP;CSE1L;CTNNB1;CTNND1;CUL7;DLGAP5;DNMT1;ERBB2;FASN;FGFR1;FN1;GLI3;HCFC1;HIF1A;HSPA4;HSPH1;IGF1R;IGF2BP1;IGF2R;KDM4B;KIF14;LRP6;MSH6;MTOR;NOTCH1;NOTCH2;NUP98;PEG10;PIK3CA;PIK3CB;PPP2R1A;PRKDC;PTPN11;PTPN13;PTPRD;PTPRF;RICTOR;RSF1;SALL4;SCAF11;SETD1A;SETD2;SMARCA1;SND1;SPEN;SRRM2;SSRP1;STAT3;TJP1;TRIM24;TSC2;ZMYM2		Anxiety disease	0.000170755	31	BAZ1B;CHD7;CLIP2;DCTN1;ELN;FGFR1;FIG4;FLII;FMR1;FUS;GNAS;GTF2I;HNRNPA1;IGF1R;MLH1;MSH2;MSH6;NIPBL;OCRL;PARK7;PIK3CA;RAD21;RAI1;RFC2;SMC1A;SMC3;SOD1;TBK1;UNC13A;VCP;VPS13A
Ependymoma	0.0217652	19	EPB41;EPHB2;ERBB2;MAP2;MIB1;MKI67;MSH2;MSH6;NF1;NF2;NOTCH1;PIK3CA;PIK3CB;PTPRS;STAT3;TPR;TSC2;ZEB1;ZFHX4		Invasive Ductal Breast Carcinoma	0.000176504	44	ACTN4;APC;AR;ATF4;ATM;AURKA;BRCA1;BRCA2;CAV1;CCND1;CD44;CDH1;CDKN1A;CTBP1;CTCF;DNMT1;EGFR;ERBB2;ESR1;FN1;GLI2;GSTP1;HIF1A;KDM2A;MAPK8;MDM2;MKI67;MLH1;MYC;NME1;NOTCH1;PCNA;PIK3CA;PTPN11;PTTG1;RAD51;RB1;SIRT1;SKP2;SMAD4;TET1;THBS1;TP53;VDR
Malignant Fibrous Histiocytoma	0.0227642	13	IGF1R;MFHAS1;MIB1;MKI67;MSH2;MTOR;NOS2;PIK3CA;PIK3CB;PTCH1;RB1;STAT1;TBC1D9		Aortic Valve Insufficiency	0.000178281	49	AGO2;AKT1;APEX1;AR;ARHGEF2;BRCA1;CAV1;CCND1;CDK2;CDK5;EGF;EIF4E;ELN;ERBB2;ESR1;FBN1;FLNA;FN1;GREB1;GRK2;HDAC1;HDAC6;HIF1A;HIST1H2BE;HSP90AA1;JUN;MCL1;MDC1;MSH6;MYC;MYLK;NCOA2;NCOA3;NPEPPS;PCNA;PIK3CA;PIK3CB;PPARG;PRDX1;PTEN;SIRT1;SKP2;SMAD3;SREBF1;STAT3;TP53;URI1;YBX1;ZEB1
Renal failure in adulthood	0.0227642	13	ALMS1;BAZ1B;CLIP2;CPT2;FN1;GSN;GTF2I;NOTCH2;OCRL;PNPLA6;SALL1;SMARCAL1;ZNF592		Malignant neoplasm of gastrointestinal tract	0.000178281	46	APC;APEX1;ATM;AURKA;AURKB;AXIN1;BRCA2;CALM1;CALM2;CALM3;CD44;CDH1;DOCK11;EGFR;ERBB2;FEN1;GSK3B;HDAC9;HIF1A;HLA-C;HSP90AA1;HSPA4;IGF1R;IGF2R;JAG1;JAK1;MAPK1;MAPK8;MLH1;MSH2;MSH3;MSH6;ODC1;PPARG;PTEN;PTTG1;RAPGEF1;RICTOR;SDC1;SMAD2;SMAD4;SP1;SPTBN1;STAT3;TBC1D9;TP53
Abnormal dermatoglyphic pattern	0.0228192	7	KAT6B;KMT2D;PTPN11;RAB3GAP2;RB1;SOS1;SOS2		Metastasis from malignant tumor of prostate	0.000178281	46	ABCA1;ABCC4;AKT1;AR;BCAR1;CAV1;CD44;CDH1;CDK2;CDK5;CDKN1A;CHD8;CSE1L;CTBP1;CTCF;CTNND1;EEF1A1;EGF;EGFR;ERBB2;HDAC1;HIF1A;HSP90AA1;HSPG2;JAG1;JAK1;MAPK8;MCM7;MYC;NGF;NME1;NPEPPS;PCBP2;PIK3CA;PIK3CB;PKN1;PPP2R1A;PPP2R2C;PREX1;PRKD1;PTEN;RNF20;RUNX2;SENP1;TP53;YBX1
Philadelphia chromosome positive chronic myelogenous leukemia	0.0228192	7	ABL1;ASXL1;BCR;NUP98;RALGAPB;SF3B1;TBC1D9		Mucinous Adenocarcinoma	0.000180469	26	APC;ARID1A;BRAF;EGFR;EML4;EPHB2;ERBB2;ESR1;GMNN;GNAS;GPC3;HIF1A;MAPK1;MDM2;MLH1;MSH2;MSH6;MYC;PIK3CA;PPP2R1A;PTEN;RSF1;SF3B1;SMAD3;TP53;TTF1
Mitral Valve Prolapse Syndrome	0.0229712	11	BAZ1B;BCOR;CLIP2;DCHS1;FBN1;FBN2;FLNA;GNAS;GTF2I;POLG;PTPN11		Late tooth eruption	0.000185613	21	BCOR;CHD7;CUL7;FLNA;GJA1;GNAS;KAT6B;LONP1;NIPBL;OBSL1;PIK3R1;POLR3B;PTCH1;RAD21;RUNX2;SEC23A;SEC24D;SMC1A;SMC3;STAT3;VDR
BREAST-OVARIAN CANCER, FAMILIAL, SUSCEPTIBILITY TO, 1	0.0229712	5	BRCA1;BRCA2;MSH6;PALB2;PIK3CA		FRIEDREICH ATAXIA 1	0.000186795	19	AR;BRCA1;BRCA2;CCT3;CTCF;DNMT1;ERBB2;ESR1;FANCC;FMR1;GPX1;HDAC3;HIF1A;MLH1;MSH2;OPA1;PPARG;SYNE1;TP53
Chediak-Higashi Syndrome	0.0229712	5	AP3B1;LYST;PIK3R4;VPS13B;VPS39		Colonic Polyps	0.000187353	20	AKT1;APC;BRAF;BRCA1;CTNNB1;EGF;EGFR;HDAC2;IGF1R;MLH1;NOS2;ODC1;PCNA;PHGDH;PIK3CA;PPARG;PTTG1;TET1;TP53;VDR
Chronic Neutrophilic Leukemia	0.0229712	5	ABL1;ASXL1;BCR;JAK1;KMT2A		Congenital small ears	0.000187353	20	ATR;ATRX;CDC6;DCHS1;EFTUD2;GLI3;HNRNPK;NIN;NSD2;ORC1;ORC4;PCNT;PLEC;POLR1A;RBM10;RPS28;SALL1;SF3B4;SMAD4;TTC37
Hereditary Diffuse Gastric Cancer	0.0229712	5	APC;CTNNA1;CTNNB1;CTNND1;JUP		Rash and Dermatitis Adverse Event Associated with Chemoradiation	0.000194325	25	APC;APEX1;ATM;AURKA;CD44;CDC20;CHEK1;EGFR;EPHB2;ERBB2;ESR1;FANCD2;MAPK1;MDM2;MIB1;MKI67;MLH1;MSH2;MSH6;PARP1;PIK3CA;PROM1;PTEN;TIMP2;TP53
Laryngomalacia	0.0229712	5	AHDC1;CREBBP;EP300;KAT6B;LTBP4		ESTROGEN RESISTANCE	0.000194325	13	AKT1;AR;BCAR1;CCND1;CDC42;EGFR;ERBB2;ESR1;INSR;PIK3CA;PIK3CB;RTN4;ZFYVE9
Macroencephaly	0.0229712	5	HERC1;MTOR;PIK3CA;PIK3CB;TSC2		Malignant neoplasm of male breast	0.000194325	15	AR;BRCA1;BRCA2;CCND1;CHEK1;EGFR;ERBB2;ESR1;GSTP1;HIF1A;MYC;PALB2;PIK3CA;PTEN;TP53
Micronodular cirrhosis	0.0229712	5	APC;CTNNB1;IGF2R;PIK3CA;POLG		Thrombocytosis	0.000194325	15	ABL1;AR;BCR;CALR;CBL;DAAM1;HSP90AA1;JAK2;KANK1;NF1;NUP214;RARS;RPS14;RPS19;SF3B1
Optic Nerve Glioma	0.0229712	5	MTOR;NF1;PIK3CA;PIK3CB;TSC2		Thyroiditis	0.000194325	15	AKT1;BRAF;CALR;ERBB2;HIST2H2AC;HLA-C;PIK3CA;PRDX1;PTCH1;PTEN;RPL37;RPS19;SSB;STAT1;TP53
Pdgfra-Associated Chronic Eosinophilic Leukemia	0.0229712	5	ABL1;BCR;CCDC88C;CDK5RAP2;PCM1		Ectopic kidney	0.000201337	8	DNA2;FANCA;FANCC;FANCD2;GLI3;LEMD3;NIPBL;SNRPB
SPINOCEREBELLAR ATAXIA, AUTOSOMAL RECESSIVE 1	0.0229712	5	DDX46;DHX16;POLG;SACS;SETX		malignant neoplasm of breast staging	0.000201337	8	BIRC5;BRCA1;BRCA2;CCND1;ESR1;GSTP1;TP53;ZNF217
Stage 0 Breast Carcinoma	0.0229712	5	BRCA1;BRCA2;ERBB2;MIB1;MKI67		Addictive Behavior	0.000204079	46	ABCA1;ABL1;AKT1;AR;ATM;BRAF;CALM1;CALM2;CALM3;CDK7;CDK9;CNR1;CREB1;CREBBP;CSNK2A1;EGFR;EIF4E;EPHA3;ERBB2;ESR1;H2AFX;HDAC6;HSP90AA1;IGF1R;JUN;KALRN;KMT2A;MSH3;MTOR;MYC;MYO6;NOTCH1;NR3C1;PIK3CA;PIK3CB;PLK1;PRKDC;PTEN;ROBO1;SEC23B;SPHK1;STAT3;STAT5B;SUGP1;TBK1;VPS13A
Tonsillar Carcinoma	0.0229712	5	HIF1A;PIK3CA;PIK3CB;PRKDC;XRCC5		Hypoplasia of corpus callosum	0.000205673	31	AHDC1;ANKRD11;ARFGEF2;C12orf57;C2CD3;CLP1;CTNNB1;DCHS1;DIAPH1;EFNB1;EXOSC8;FGFR1;GBA2;HSD17B4;KIF5C;LONP1;PAFAH1B1;PCLO;POGZ;POLR3A;POLR3B;PPP2R1A;RAB3GAP2;RARS;SPG11;SPTAN1;TECPR2;YWHAE;ZBTB20;ZFYVE26;ZNF592
Congenital Abnormality	0.023144	65	ACTG1;ALMS1;ANKRD11;APAF1;ARFGEF2;C2CD3;CASK;CENPF;CHD7;CTNNB1;CUL4B;DYNC1H1;EP300;EPHA7;ERBB2;FANCD2;FBN1;FGFR1;FIG4;FLNA;FLNB;FUS;GAS1;GLI3;GRK2;GTF2I;HSPA9;HTT;IGF1R;INSR;JAG1;KIF5C;KMT2B;KMT2D;LAMB2;MED13L;MTHFD1L;MTOR;MTR;NF1;NIPBL;NOL11;NOTCH1;NSD1;NUP214;PIK3CA;PIK3CB;PLEC;PTCH1;PTPN11;RBM10;SALL1;SALL2;SALL4;SCAF11;SMARCAL1;SMC3;SRRM2;STAT1;TSC2;TSHZ1;USP9X;WWP2;ZEB1;ZNF423		Heart failure	0.000210624	120	ACACA;ACLY;ADCY6;AKT1;ALMS1;ANK2;ANXA2;ARID1A;ATM;ATP2B4;ATP5A1;BRCA1;BRD1;CAD;CALM1;CALM2;CALM3;CALR;CD44;CDK9;CDKN1A;CLCN3;CPT2;CRK;CRMP1;CTTN;DDR1;DNER;DNMT1;DSP;EGFR;ELN;EPHA3;ERBB2;ERBIN;FASN;FBN1;FLNA;GJA1;GNL2;GOLGB1;GPM6A;GRK2;GSK3B;GSN;HADHA;HDAC4;HDAC5;HIF1A;HLA-A;HLA-C;HNRNPD;HSPA4;HTT;JARID2;JUP;KIF1B;LONP1;LRPPRC;MALAT1;MAPK1;MAPK14;MAPK8;MFN2;MGEA5;MMRN1;MTOR;MYLK;NCAM1;NES;NGF;NISC…
Death in early adulthood	0.0239104	6	ALMS1;MSH2;MSH6;PIK3CA;POLG;VPS13A		Dental Enamel Hypoplasia	0.000220782	16	AMBN;ATR;CREBBP;EP300;FLNB;GJA1;GNAS;ITGA6;LONP1;NF1;OCRL;PCNT;PEX1;PLEC;RUNX2;VDR
Fibrous skin tumor of tuberous sclerosis	0.0239104	6	MSH2;MSH6;PIK3CA;PLCD1;SEC23B;TSC2		Small hand	0.000220782	16	ADNP;CENPE;CTNND2;CUL4B;DPM1;FBN1;FGD1;FMR1;GJA1;HDAC4;HERC2;NIPBL;ORC1;RAD21;SMC1A;SMC3
Fleck corneal dystrophy	0.0239104	6	FN1;JAK1;PIKFYVE;PTPRG;TSC2;ZEB1		Desmoplastic	0.000220782	23	BRAF;CAV1;CD44;ELN;ERBB2;EWSR1;FN1;HSPG2;MIB1;MKI67;OTX2;PIK3CA;PPARG;PROM1;PTCH1;RUNX2;SHH;SMAD4;SMARCA4;TERF2;THBS1;TIMP2;TP53
Precursor T-cell lymphoblastic lymphoma	0.0239104	6	ABL1;FGFR1;MSH2;PTPN11;SEC31A;ZMYM2		Endometrial Hyperplasia	0.000220782	23	APC;AR;ARID1A;ATM;CDK2;CDK4;CELSR2;CREBBP;DDX1;DNMT1;EIF4E;ESR1;GJA1;MLH1;MSH2;NCOA1;NCOA3;NCOR2;PCNA;PIK3CA;PTEN;SRC;TP53
Sacral dimples	0.0239104	6	BAZ1B;CLIP2;DCHS1;GTF2I;MED12;NSD2		Squamous cell carcinoma of tongue	0.000221548	32	AKT1;ASAP1;ATM;BRCA1;CAV1;CCND1;CDC45;CDC6;CDH1;CREBBP;CSDE1;EGF;EGFR;ESR1;EZR;HIF1A;IGF1R;MCM2;MLH1;MYC;NME1;PIK3CA;PLS3;PTBP1;PTEN;ROCK2;SCAF11;SRRM2;TOP2B;TP53;VIM;ZEB1
Cerebellar Dysmetria	0.0242248	12	BAZ1B;CLIP2;GTF2I;KIF1A;KIF1C;POLR3A;POLR3B;RARS;SACS;SPTBN2;SYNE1;TECPR2		Malignant Glioma	0.000224593	76	ABCA1;AKT1;AR;ATM;AURKB;BIRC5;CALM1;CALM2;CALM3;CALR;CCND1;CD44;CDK2;CDK4;CDKN1A;CREB1;CRK;DOCK1;EGF;EGFR;EPHB2;ERBB2;FIG4;GJA1;GNL3;GRIA2;H2AFX;HIF1A;HK1;HLA-C;HMGA1;KIF23;LLGL1;LRIG1;MAPK1;MAPK14;MAPK8;MCL1;MCM3AP;MDM2;MSH2;MSH6;MTOR;NES;NF1;NOTCH2;NUP214;PARP1;PCNA;PIK3CA;PIK3CB;PIK3R1;PLXNA1;PPP1R12C;PRKDC;PROM1;PTEN;RAC1;RANBP2;ROBO1;ROCK1;SDC1;SETD2;SLC9A3R1;SND1;SP1;STAT1;STAT3;TERF1;THBS1…
Uterine Cancer	0.0242248	12	BRCA1;BRCA2;ERBB2;HSPA8;MSH2;NES;PIK3CA;PIK3CB;PPP2R1A;PTK2;VCL;ZEB1		Arthritis, Reactive	0.000226622	12	CALM1;CALM2;CALM3;FN1;GLI2;HLA-C;HSPD1;JUN;RPL23;STAT1;TP53;VDR
LIMB-MAMMARY SYNDROME	0.0245459	9	JAK1;MED12;MYLK;NUP214;PTK2;ROR2;STAT3;TYRO3;VCAN		High pitched voice	0.000226622	12	BLM;CTNND2;FMR1;HSPG2;MED12;ORC4;PCNT;POLD1;SEC24D;SERPINH1;SMARCAL1;TRIM37
Dyschezia	0.0245939	20	ARVCF;ATRX;BAZ1B;BRCA1;CLIP2;CREBBP;EP300;FLII;FLNA;GTF2I;MED12;MSH2;MSH6;OCRL;PIK3CA;POLG;RAI1;SALL1;SEC24C;UBE3A		Hypoplasia or absence of the corpus callosum	0.000226622	12	APC2;BRAF;FGFR1;FLII;GLI3;LRP2;MED12;PEX1;RAB3GAP2;RAI1;SETD2;SHH
Hyperlipidemia	0.0248245	28	ABCA1;ACACA;ACSL3;ACTN4;AGL;APC;BUD13;CAD;DOCK7;EPHB2;FHOD3;GREB1;HELZ2;HIF1A;HSPG2;INSR;KIDINS220;LRP1;LRP2;MTR;MYLK;MYO5A;PLXNA1;SCAP;SMARCD1;SREBF1;SREBF2;WDHD1		Overlap syndrome	0.000226622	12	ABL1;ASXL1;CBL;EXOSC10;FLNA;JAK2;PAFAH1B1;RARS;SF3B1;SMAD4;SNRNP70;YWHAE
Glioma	0.0253303	185	ABCA1;ABL1;ACLY;ADAR;AKAP12;APAF1;APC;ARHGAP35;ARHGEF2;ASPM;ATM;ATR;ATRX;BCAR1;BIRC6;BRCA1;BRCA2;BRD7;BRD8;CDH2;CHAF1A;CIC;CLCN3;CLTC;CNOT1;CSE1L;CTCF;CTNNB1;CTNND1;CTNND2;CTR9;DAXX;DDR1;DDX46;DDX5;DHX16;DICER1;DMXL1;DNMT1;DOCK1;DYNC2H1;EIF3A;EP300;EPHA3;EPHB2;ERBB2;FANCD2;FASN;FAT1;FGFR1;FHOD3;FLNB;FLNC;FN1;FOCAD;FREM2;FYN;GAS1;GLI2;GSN;HDAC2;HDAC3;HDAC6;HEATR1;HIF1A;HK1;HNRNPU;HSPA4;HSPA8;IGF1R…		Neurofibromatoses	0.000231094	22	AR;AURKA;BRAF;CD44;CDC42;EGF;EGFR;EPHB2;FN1;IGF1R;IMMT;MAPK1;NES;NF1;NF2;NGF;PAK1;PTPN11;RAC1;STAT3;TOP2A;TP53
Motor neuron atrophy	0.0253303	16	ALS2;ATP7A;CCDC88A;DCTN1;FIG4;FUS;GARS;HECW1;HIF1A;KIF1A;NES;PIK3CA;PIK3CB;PNPLA6;SPG11;VCP		Mammary Carcinoma, Human	0.000236554	17	BRCA1;CD44;EGF;EGFR;ERBB2;ESR1;GPX1;GSTP1;HIF1A;HMGA1;MAPK8;NME1;PIK3CA;PIK3CB;SPHK1;STAT5B;TP53
Hypogonadism, Isolated Hypogonadotropic	0.0255773	15	CHD7;CTNNB1;FGFR1;GLI2;HERC2;KAT6B;MAP3K1;PNPLA6;POLR3A;POLR3B;PTPN11;RAB3GAP2;RNF216;SOS1;SOS2		Hereditary Breast and Ovarian Cancer Syndrome	0.000247255	18	AR;ATM;BARD1;BRCA1;BRCA2;CDK2;EPHA3;ERBB2;HRAS;MLH1;MSH2;MSH6;NOTCH3;PALB2;PTEN;RAD51;SEM1;TP53
invasive cancer	0.0255773	24	ABCA1;APC;ASAP1;BRCA1;BRCA2;CCDC88A;CTNNB1;ERBB2;FGFR1;HIF1A;IGF1R;INTS2;JAG1;KDM5B;MCM2;MSH2;MSH6;MTOR;NOTCH1;PIK3CA;PUM1;SMARCA4;UBE3A;ZEB1		Ependymoma	0.000248379	31	CAV1;EGF;EGFR;EPB41;EPHB2;ERBB2;GSTP1;JAK2;MAP2;MDM2;MIB1;MKI67;MLH1;MSH2;MSH6;NCL;NF1;NF2;NOTCH1;PIK3CA;PIK3CB;PROM1;PTEN;PTPRS;RELA;STAT3;TP53;TPR;TSC2;ZEB1;ZFHX4
Precursor T-Cell Lymphoblastic Leukemia-Lymphoma	0.0259109	42	ABCA2;ABCA3;ABL1;AFDN;ATM;BCR;BRCA1;BRCA2;CREBBP;DICER1;EIF4A2;EML1;FANCD2;FGFR1;FN1;GLI3;HIF1A;IARS;IGF1R;JAG1;JAK1;KMT2A;MSH2;MTOR;NF1;NOTCH1;NOTCH3;NUP155;NUP214;NUP98;PARP1;PIK3CA;PIK3CB;PTPN11;SMC4;SOS1;STAT1;STAT5B;TAF1;TBC1D9;UBR1;WDTC1		Bloom Syndrome	0.000254811	27	ABCA1;ATM;ATR;BLM;BRCA1;BRCA2;CBL;CDKN1A;EIF4E;FANCC;FANCD2;FLNB;H2AFX;HLA-C;MDM2;MLH1;MSH2;MYC;NME1;RAD51;SOD1;SPIDR;TOP2B;TOPBP1;TP53;TXN;WDTC1
Abnormality of position of teeth	0.0259109	4	BCOR;FBN1;FLNA;RAB3GAP2		Retinal Neoplasms	0.000257659	9	AKT1;MDM2;MTR;PIK3CA;PTEN;RB1;RFC1;TP53;VDR
Absent frontal sinuses	0.0259109	4	ATRX;FLNA;NOTCH2;TRIM37		Thumb aplasia	0.000257659	9	FANCA;FANCC;FANCD2;FIG4;PTEN;RPL26;RPS19;SF3B4;ZBTB16
Aplasia of frontal sinus	0.0259109	4	ATRX;FLNA;NOTCH2;TRIM37		Anemia	0.000258607	70	ABCA1;ABL1;AR;ASXL1;ATP2B4;ATP5E;ATP7A;BCR;CALR;CAV1;CCND1;CDK5RAP2;CDKN1A;CHEK1;COL17A1;DKC1;EGFR;ERBB2;FANCA;FANCC;FANCD2;FANCG;FASTKD2;GPX1;GSTP1;H2AFX;HIF1A;HIST1H2BJ;HK1;HLA-A;IFT140;INTS1;JAK1;JAK2;LARS;LCK;LPIN2;LYST;MARS;NCAM1;NME1;NOP10;NOS2;PAFAH1B1;PARP1;PFKM;PLEC;PTEN;RARS;RPL26;RPS14;RPS19;RPS7;SEC23B;SETD2;SF3B1;SLU7;SMAD4;SMARCAL1;SOD1;SRC;STAT1;STAT3;TP53;TP53BP1;UBE2T;VDR;VHL;YWH…
Benign neoplasm of liver	0.0259109	4	MIB1;MKI67;STAT3;TBC1D9		High-Grade Prostatic Intraepithelial Neoplasia	0.000262482	24	APC;AURKA;BRCA2;CAV1;CD44;CHEK1;EGFR;ERBB2;FASN;GSTP1;LONP1;MIB1;MKI67;MYC;PIK3CA;PIK3CB;PTEN;RICTOR;RXRA;SENP1;SIRT1;SKP2;TBC1D9;TP53
Diffuse mesangial sclerosis (disorder)	0.0259109	4	ACTN4;FN1;LAMB2;ZNF592		Low-set, posteriorly rotated ears	0.000265678	32	BAZ1B;BCOR;BRAF;CHD7;CLIP2;CTNND2;ELN;FGD1;FGFR1;GPC3;GRIP1;GTF2I;HSPG2;INSR;KAT6B;NF1;NIPBL;NSD2;OCRL;OTX2;PEX1;PEX5;PTPN11;RAB3GAP2;RAD21;RFC2;ROR2;SMC1A;SMC3;SOS1;SOS2;ZNF423
Exencephaly	0.0259109	4	CECR2;GTF2I;HSPG2;KDM2B		Fibrous skin tumor of tuberous sclerosis	0.000271038	10	AKT1;HRAS;MLH1;MSH2;MSH6;PIK3CA;PLCD1;PTEN;SEC23B;TSC2
Misalignment of teeth	0.0259109	4	BCOR;FBN1;FLNA;RAB3GAP2		Adrenocortical carcinoma	0.000281954	37	ACACA;AKT1;APC;ATM;ATP1A1;BMS1;BRAF;CTNNB1;DAXX;DICER1;EGF;EGFR;EPHB2;ESR1;HRAS;IGF1R;IGF2R;IRS1;JAG1;MAPK1;MED12;MSH2;NGF;NOTCH1;PPARG;PTTG1;RB1;RRM1;SHH;SMARCA4;SPHK1;STAT5B;TBC1D9;THBS1;TOP2A;TP53;VIM
PTEN Hamartoma Tumor Syndrome	0.0259109	4	MTOR;NF2;PIK3CA;PIK3CB		Thin upper lip vermilion	0.000281954	23	ACTG1;ADNP;AGL;AP3B1;ATRX;BCR;CLP1;CTNNB1;FBN1;HERC2;IGF1R;KAT6A;KDM5C;KIF11;KMT2A;MAPK1;MED12;NIPBL;RAD21;ROR2;SEC23A;SMAD4;SMC1A
Precursor T cell lymphoblastic leukemia/lymphoblastic lymphoma	0.0259109	4	FGFR1;NOTCH1;NOTCH3;PTPN11		Intrahepatic Cholangiocarcinoma	0.000298608	34	AKT1;APC;ARID1A;BRAF;CCND1;CDH1;CDKN1A;DNMT1;EGFR;ERBB2;GNAS;GRB2;GSTP1;HDAC1;HIF1A;MDM2;MLH1;MMRN1;MSH2;NES;NOTCH1;PBRM1;PIK3CA;PIK3CB;PROM1;PTEN;RAD51;ROBO1;SDC1;SMAD4;STAT3;TP53;VDR;VIM
Round cell sarcoma	0.0259109	4	BCOR;CIC;EWSR1;PATZ1		Down Syndrome	0.000300486	84	ABL1;ACO1;ADAR;AMPH;APEX1;CALM1;CALM2;CALM3;CCND1;CDKN1A;CPS1;CREB1;DICER1;DOPEY2;DPYSL3;EEF1A1;ERBB2;ESR1;FLNA;FMR1;FN1;FYN;GMNN;GSN;GSTP1;HLA-A;HNRNPA2B1;HSPD1;IMMT;JAK2;KMT2A;KRT8;LTA4H;MCM3AP;MTHFD1;MTHFD1L;MTOR;MTR;MYO9B;NACA;NAE1;NCAM1;NF1;NGF;NME1;NOS2;NPM1;NUP214;PABPC4;PARD3;PARP1;PARP4;PCNT;POLB;PPP2CA;PRDM16;PRDX1;PRDX6;PTCH1;PTPN11;RACK1;RELA;RFC1;RPLP0;SHH;SIRT1;SLU7;SOD1;STAT1;STAT3…
Stage I Endometrial Carcinoma	0.0259109	4	ERBB2;MIB1;MKI67;MSH2		Spastic syndrome	0.000300486	22	AR;ATM;COL17A1;DDX1;EEF1A1;EWSR1;FMR1;HDAC2;HLA-C;HTT;MAP2;MYC;NGF;PABPN1;PHKA2;PRKDC;PTEN;RARA;SRSF1;SRSF2;TPR;TSHZ1
Subacute progressive viral hepatitis	0.0259109	4	APC;CTNNB1;IGF2R;PIK3CA		Hand deformities	0.000304749	13	ALMS1;CCDC88A;HK1;PNPLA6;RPL11;RPL26;RPL35A;RPS17;RPS19;RPS24;RPS28;RPS29;RPS7
MYELODYSPLASTIC SYNDROME	0.0259109	69	ABL1;AKAP12;AKAP13;APAF1;APC;ASXL1;ATF7IP;ATM;ATRX;BCOR;BCORL1;BCR;CPT2;CREBBP;CTNNA1;DIAPH1;DICER1;DNMT1;DROSHA;EP300;FANCD2;FLII;FRYL;GNAS;HSPA4;HSPA9;IGF1R;INTS1;INTS2;IRS2;JAG1;JAK1;KDM2B;KMT2A;KMT2C;MCM2;MCM3AP;MSH2;MSH3;NF1;NOS2;NSD1;NUP214;NUP98;PIK3CA;PIK3CB;PLCG1;POLG;PRDM16;PRPF8;PTPN11;RALGAPB;RARS;RB1;ROBO1;SALL4;SF3B1;SIN3A;SLU7;SRP72;STAG2;STAT3;TBC1D9;TTF1;WDTC1;WNK1;XRCC5;XRCC6;ZN…		Follicular thyroid carcinoma	0.000311003	35	ACACA;AKT1;ATM;BMS1;BRAF;CAV1;DLL1;EGF;EGFR;FBN1;H2AFX;IGF1R;IQGAP1;MADD;MIB1;MKI67;MTOR;NME1;NOTCH1;PHB;PIK3CA;PIK3CB;PPARG;PTCH1;PTEN;RARA;SMG1;TAF1;THBS1;TP53;TPT1;VDR;VIM;WDR3;YY1
Endometrial Neoplasms	0.0259169	30	APC;ARID1A;ATM;ATR;BRCA1;BRCA2;CHD4;CTNNB1;DDR1;DNMT1;EP300;ERBB2;HIF1A;IGF1R;IRS2;JUP;LLGL1;MAP3K4;MSH2;MSH6;MTOR;NCOA3;NRIP1;PIK3C2A;PIK3CA;PIK3R1;POLD1;TSC2;VCAN;ZEB1		Metastatic melanoma	0.000313556	65	ADAR;AKAP12;AKT1;APAF1;AURKB;BLM;BRAF;CALM1;CALM2;CALM3;CALR;CAV1;CCND1;CD44;CDK9;CREB1;EGFR;EPHB2;ERBB2;ETFA;FN1;FTL;GJA1;HDAC1;HIF1A;HLA-A;IGF1R;IGF2BP1;JAK2;JUN;KAT5;KDM5B;MAP2;MAPK1;MCL1;MDM2;MLH1;MSH2;MSH6;MYC;NCK1;NME1;PARP1;PCNA;PIK3CA;PIK3CB;PLXNC1;PNP;PROM1;PTEN;RACK1;ROR2;SETD2;SKP2;SP1;SRC;SRSF1;STAT1;STAT3;THBS1;TIAM1;TP53;VDR;VIM;ZBTB16
Sarcoma	0.0259169	70	ABL1;ACACA;AMER1;APAF1;APC;ATM;ATRX;BCOR;BMS1;BRCA1;BUB1;CCAR2;CIC;CMAS;CTNNB1;CYFIP2;DICER1;EIF2AK4;EPHB2;ERBB2;ESPL1;EWSR1;EXTL3;FBXW11;FGFR1;FLII;FN1;FUS;HIF1A;IGF1R;IGF2BP1;IRS2;KAT6A;LATS2;MAML3;MGEA5;MIB1;MKI67;MSH2;MSH3;MTA2;MTOR;NCOA2;NES;NF1;NOS2;PARP1;PATZ1;PIK3CA;PIK3CB;PRKDC;PTK2;PTPRG;RB1;RBL2;RICTOR;ROR2;RUSC2;SALL2;SART3;SMARCA4;STAT1;TAF15;TBC1D9;TLN1;TOP2A;TRIO;TSC2;WDTC1;ZEB1		Disseminated Malignant Neoplasm	0.000322558	36	ABCA1;APC;AR;ATM;CAV1;CD44;EGFR;ERBB2;ESR1;GSK3B;GSTP1;HLA-A;HSP90AA1;KRT8;LDHB;LEF1;MTMR3;MUM1;MYC;MYO5A;NDUFB9;NME1;PAK1;PIKFYVE;PPP2R1A;PTEN;RUNX2;SETD2;SMAD2;SMAD3;SMAD4;SRSF6;STAT3;TP53;VIM;ZEB1
Parkinsonian Disorders	0.0259241	29	ABL1;ATP13A2;CHAF1A;CTR9;DCTN1;DNAJC13;EIF4G1;FUS;FYN;HSPA4;HSPA9;LRP2;MGEA5;MTOR;NDUFS1;OPA1;PARP1;PIK3R4;POLG;RAB3GAP2;SPG11;SRRM2;SYNJ1;TAF1;VCP;VPS13A;VPS13C;VPS35;XPR1		Wide spaced nipples	0.000331455	17	BRAF;CBL;CHD7;COL4A3BP;CPT2;FGFR1;GRIP1;HDAC4;HNRNPK;IGF1R;KAT6B;MEGF8;PACS1;PTPN11;SMS;SOS1;SOS2
Myotonic Dystrophy	0.0261821	20	ABCA1;AMPH;ATP2B1;BUB1;CCT3;CDC42BPA;CDC42BPB;CLIP2;CTCF;DDX5;INSR;MSH2;MSH3;MTMR1;MYLK;NF1;NUP214;SLU7;SPEN;SRRM2		Adult Acute Myeloblastic Leukemia	0.000333869	24	ASXL1;BCORL1;BCR;CEBPZ;EGFR;ESR1;FANCA;GSTP1;HIF1A;KMT2A;MDM2;MSH3;MTOR;NCAM1;NF1;NPM1;NUP98;PAFAH1B1;PTPN11;SF3B1;TBC1D9;THADA;TP53;YWHAE
Heartburn	0.0267986	17	ATRX;CHD7;FLII;FLNA;KIF1A;LTBP4;NIPBL;NSD2;ORC1;PIK3CA;PIK3CB;RAD21;RAI1;SALL1;SMC3;TECPR2;ZEB1		Osteopenia	0.000337436	50	ATF4;BRAF;CCND1;CD44;CFTR;CHD7;DCHS1;DOCK11;ELN;EPHB2;ESR1;FBN1;FBN2;FGFR1;GJA1;GLI2;GNAS;GNPTAB;HIF1A;HRAS;HSD17B4;HSPD1;IARS2;IRS2;KIF3A;KRT8;LRP4;LRP5;MAPK1;NCK1;NCOA1;NOS2;NOTCH2;NR3C1;OTX2;PLS3;PPARG;RB1CC1;RPL29;RUNX2;SEC24D;SERPINH1;SIRT1;SLC9A3R1;SMARCAL1;SRC;STAT1;STAT3;TXN;VDR
Short distal phalanges	0.0273364	10	ARID1A;FLNA;FLNB;JAG1;KDM5C;NOTCH1;NOTCH2;PCNT;ROR2;SMARCA4		Muscular Dystrophy, Facioscapulohumeral	0.000362995	23	ASH1L;CD44;CDKN1A;CTCF;ELN;FLNA;FXR1;HIST1H4A;HIST1H4B;HIST1H4C;HIST1H4D;HIST1H4E;HIST1H4H;HIST1H4I;HIST1H4K;HSPA4;HSPG2;NAT10;PRPF6;PTBP1;SMCHD1;SRRM2;TP53
Sebaceous Adenocarcinoma	0.0273364	7	ABCA1;BRCA1;CTNNB1;ERBB2;FGFR1;MSH2;MSH6		Mitochondrial abnormalities	0.000370388	14	AGTPBP1;ATM;CREBBP;FMR1;FUS;HADHA;HIF1A;NOTCH3;PEX5;PLEC;POLG;SOD1;TP53;VCP
Tapering fingers (finding)	0.0273364	7	ATRX;CPT2;FIG4;HUWE1;INPPL1;KIF1A;SLC12A6		Hodgkin Disease	0.000379214	90	ABCA1;AGO2;AKT1;AR;ASXL1;ATF7IP;ATM;BCR;BRCA1;BRCA2;CALM1;CALM2;CALM3;CCND1;CD44;CDK2;CDK4;CDKN1A;CNR1;DDR1;DICER1;DKC1;EIF4E;EML4;EOMES;EPHA3;EPHA7;ERBB2;ETFA;FLNB;GSTP1;HBS1L;HDAC1;HDAC6;HDAC9;HIF1A;HIP1;HLA-A;HLA-C;HTT;JAK1;JAK2;JUN;KMT2A;LONP1;MAP1S;MCM3AP;MDM2;MIB1;MKI67;MLH1;MTHFD2;MTOR;MYC;NCOR2;NME1;NOTCH1;NPM1;NUP214;OTX2;PAFAH1B1;PCNA;PIK3CA;PIK3CB;PIK3R1;PLK1;PPARG;PTEN;PTPN11;RANGAP1;…
Pancreatic intraepithelial neoplasia	0.0274012	16	ATM;BRCA2;ERBB2;FASN;HIF1A;NCOA3;NES;NOTCH1;NOTCH2;PHGDH;PIK3CA;PIK3CB;PPP2R3A;SMARCA4;STAT3;ZEB1		Rectal Neoplasms	0.000386824	25	AKT1;APC;BIRC5;BRAF;CALR;CD44;CDH1;CDK7;EGF;EGFR;GSTP1;HRAS;MKI67;MLH1;MSH2;MSH6;MTOR;PCNA;PIK3CA;PPARG;PTEN;RPS6KB1;TP53;TSC2;VDR
Gait Ataxia	0.0277724	13	CUL4B;EEF2;HIP1;HSD17B4;HTT;KIF1C;PNPLA6;POLG;SETX;SPTBN2;SYNE1;SYNJ1;TECPR2		Ichthyosis, X-Linked	0.00039197	27	AKT1;BRAF;BRCA1;EGF;EGFR;ERBB2;EWSR1;EZR;FMR1;FN1;HIF1A;MAPK8;MDM2;MIB1;MKI67;MLH1;MSH2;MYC;PARP1;PTEN;RARA;SETD2;TBC1D9;TOP2A;TP53;VIM;WDTC1
Adult onset	0.0278378	15	DCTN1;DNMT1;EEF2;FLNC;GNAS;GSN;MN1;NF2;NOTCH3;PIK3CA;POLG;SYNE1;TAF1;WASHC5;XPR1		Syndactyly	0.000416554	21	ACSL3;ANKRD11;BCOR;BLM;CREBBP;EP300;FBN2;FGD1;FGFR1;FRAS1;GJA1;GLI3;LRP4;MED12;NEDD4L;NOTCH1;PIK3CA;RAC1;ROR2;SHH;WASHC5
Generalized hypotonia	0.0283911	9	CASK;HERC2;MED12;MYO5A;NSD2;POGZ;PPP2R5D;RAI1;SLC12A6		Acute Erythroblastic Leukemia	0.00041724	43	ABL1;BCR;CAD;CARM1;CCND1;CD44;CDKN1A;CENPU;CKAP2;EGFR;EML4;EPHB2;ERBB2;ESR1;FLII;GSTP1;HLA-C;HNRNPA1;HSPA4;INPPL1;JAK2;LTA4H;MAPK1;MAPK8;MCL1;NCOA3;NME1;NOTCH1;PCNA;PIK3CA;PIK3CB;PPARG;RARA;RELA;SHH;SNRNP70;SPTAN1;STAT1;STAT3;STAT5B;TP53;WNK1;ZMYND8
Hoarseness	0.0283911	9	BAZ1B;CLIP2;FBN1;FLII;FLNA;FLNC;GTF2I;LEMD3;RAI1		LATERAL MENINGOCELE SYNDROME	0.000417459	15	ELN;ESR1;JAK1;MED12;MYLK;NOTCH3;NUP214;PTEN;PTK2;ROR2;SRC;STAT3;TP53;TYRO3;VCAN
Isochromosomes	0.0283911	9	ASXL1;ATM;ATR;BCAR1;BCR;CAD;CSE1L;CTNND1;SF3B1		Triangular face	0.000437984	20	ANKRD11;BRAF;BUB1;BUB1B;CBL;CDC6;CUL7;JAG1;KAT6B;NOTCH2;OBSL1;PIK3R1;PTPN11;RAI1;SEC24D;SERPINH1;SMARCA2;SOS1;SOS2;TRIM37
Colon Carcinoma	0.0285207	174	ABCA1;ACACA;ACTG1;AFDN;APAF1;APC;APC2;ARHGEF17;ATM;ATP2B4;ATP2C1;ATP7A;ATR;BCAR1;BCL9;BIRC6;BRCA1;BRCA2;BUB1;CASK;CCDC88A;CDH2;CEBPZ;CHAF1A;CHD7;CREBBP;CSE1L;CTCF;CTNNA1;CTNNB1;CTNND1;CUL3;CYFIP2;DCAF1;DDX5;DHX32;DIAPH1;DICER1;DNMT1;DSP;ENC1;EP300;EPHA3;EPHA7;EPHB2;ERBB2;FASN;FBN2;FBXW11;FEM1B;FN1;GIT1;GLI2;GLI3;GNAS;GSN;HCFC1;HDAC2;HDAC3;HDAC6;HECW2;HIF1A;HIP1;HLTF;HSPA4;HSPA8;HSPA9;HSPG2;IGF1R;…		Increased gastric cancer	0.000443491	11	AKT1;APC;BUB1B;CTNNB1;EP300;MLH1;MSH2;MSH6;PIK3CA;SRC;TP53
Mitral regurgitation, mild	0.028532	8	BAZ1B;CLIP2;DCHS1;FBN1;FBN2;FLNA;GTF2I;POLG		Lymphoid neoplasm	0.000443491	11	ATM;BRCA1;CCND1;CD44;FGFR1;MLH1;MYC;NOTCH1;STAT5B;TCP1;XRCC5
Panhypopituitarism	0.028532	8	CREBBP;FGFR1;GLI2;GLI3;KMT2B;KMT2D;PTCH1;WDR11		Open Bite	0.000443491	11	BAZ1B;BRAF;CLIP2;CUL4B;ELN;GTF2I;NOTCH2;PTEN;RFC2;ROR2;RUNX2
Chubby cheeks	0.0291292	11	AGL;ATP7A;CCDC88A;FBN1;GNAS;HSPG2;KIF1A;NOTCH2;OCRL;PCNT;PIK3CA		Chromosome Breakage	0.000445802	16	ATM;BCR;BLM;BRCA1;BRCA2;FANCA;FANCC;FANCD2;FANCG;FANCI;H2AFX;MYC;NSD1;POLA1;RAD51;UBE2T
FRIEDREICH ATAXIA 1	0.0291292	11	BRCA1;BRCA2;CCT3;CTCF;DNMT1;ERBB2;HDAC3;HIF1A;MSH2;OPA1;SYNE1		Melanocytic nevus of skin	0.000451878	19	BRAF;CCND1;CDKN1A;CREBBP;DICER1;EIF4E;HDAC1;HIF1A;HRAS;HSP90AA1;HSPA8;KDM5B;MAP2;MCM3AP;MSH2;MYC;PCNA;TP53;VCAN
Full cheeks	0.0291292	11	AGL;ATP7A;CCDC88A;FBN1;GNAS;HSPG2;KIF1A;NOTCH2;OCRL;PCNT;PIK3CA		Marfan Syndrome	0.000458998	18	ATM;CD44;EGF;ELN;FBN1;FBN2;LAMC1;LRP1;MFAP1;MMRN1;NOS2;NOTCH3;PKD1;PPARG;SMAD3;SOD1;THBS1;TIMP2
Hyperplasia of cheeks	0.0291292	11	AGL;ATP7A;CCDC88A;FBN1;GNAS;HSPG2;KIF1A;NOTCH2;OCRL;PCNT;PIK3CA		Medullary carcinoma	0.000458998	18	ATM;AURKA;BRAF;BRCA1;EGF;ERBB2;ERBIN;ESR1;HSP90AA1;MDM2;MIB1;MLH1;MSH2;PCNA;PTCH1;RASA1;STAT1;TP53
Hypertrophy of cheeks	0.0291292	11	AGL;ATP7A;CCDC88A;FBN1;GNAS;HSPG2;KIF1A;NOTCH2;OCRL;PCNT;PIK3CA		Short hands	0.000458998	18	CUL4B;DPM1;FBN1;FGD1;FGFR1;FLNA;GPC3;HDAC4;HDAC6;HERC2;IGF1R;INPPL1;KAT6B;ORC1;RAB3GAP2;RAI1;ROR2;SIN3A
Puffy cheeks	0.0291292	11	AGL;ATP7A;CCDC88A;FBN1;GNAS;HSPG2;KIF1A;NOTCH2;OCRL;PCNT;PIK3CA		Renal cyst	0.000458998	23	ATF4;BUB1B;CD44;DLG5;EGFR;FLNB;FN1;GLI3;GPC3;HDAC5;HSD17B4;IFT140;KIF3A;NOTCH2;PCNA;PEX1;PKD1;PRKD1;SNRPB;TIMP2;TP53;TSC2;VHL
Melanocytic nevus	0.0292367	26	CREBBP;DICER1;EPHB2;ERBB2;HIF1A;HSPA8;IGF1R;KDM5B;LEMD3;LRP2;MAP2;MCM3AP;MIB1;MKI67;MSH2;NF1;NOS2;PARP1;PIK3CA;PLXND1;PTCH1;PTPN11;SEC23B;SMARCAL1;TRIM37;VCAN		Sezary Syndrome	0.000462838	29	ABCA1;ABL1;AKT1;ARID1A;BCR;BRAF;CCND1;CHD3;CREBBP;ERBB2;JAK1;JAK2;KMT2C;KMT2D;MAPK1;MDM2;MYC;NAV3;NEDD4L;PLCG1;PLS3;PTEN;RB1;SMARCA4;STAT3;STAT5B;TP53;VIM;ZEB1
Intestinal Neoplasms	0.0298271	22	APC;BCL9;BLM;CTNNB1;EPHB2;ERBB2;HDAC2;HIF1A;JAG1;MSH2;MSH3;MSH6;PHGDH;PIK3CA;PIK3CB;ROBO1;SCN3A;SMC2;SMC3;SRRM2;TIAM1;ZEB1		Anthrax disease	0.000469331	13	BRAF;CALR;EPHB2;ERBB2;HIF1A;HLA-C;IMMT;KIF1C;LRP5;LRP6;MAPK1;PARP1;WDTC1
AMYOTROPHIC LATERAL SCLEROSIS 2, JUVENILE (disorder)	0.0298271	6	ALS2;FUS;SETX;SOS1;SPG11;SRRM2		Adenocarcinoma, Tubular	0.000469331	8	BRCA2;EGFR;ERBB2;ESR1;MYC;PTCH1;SLC4A2;TP53
Blindness, Cortical	0.0298271	6	COL4A3BP;DIAPH1;DOCK7;KAT6A;POLG;RAB3GAP2		Cystadenocarcinoma, Mucinous	0.000469331	8	BRAF;EGF;EGFR;ERBB2;ESR1;PIK3CA;SMAD4;TP53
Cafe au lait spots, multiple	0.0298271	6	GNAS;MSH2;NF1;PCNT;SMARCAL1;TSC2		Liposarcoma, Pleomorphic	0.000469331	8	CDK4;FUS;MDM2;MSH2;MYC;NF1;PIK3CA;TP53
Lobular carcinoma in situ of breast	0.0298271	6	BRCA1;CTCF;ERBB2;MAP3K1;MSH2;PIK3CA		Peripheral pulmonary artery stenosis	0.000469331	8	BAZ1B;CLIP2;ELN;FGFR1;GTF2I;JAG1;NOTCH2;RFC2
Mixed Oligodendroglioma-Astrocytoma	0.0298271	6	ACACA;BMS1;CIC;MIB1;MKI67;NES		Squamous cell carcinoma of vulva	0.000469331	8	CCNB1;CCND1;CD44;EGFR;HRAS;MIB1;ROCK1;TP53
Sebaceous adenoma	0.0298271	6	MSH2;MSH6;PIK3CA;PLCD1;SEC23B;TSC2		Thrombocytopenia	0.000470845	56	ABCA1;ABL1;ACTN1;AP3B1;ASXL1;ATP7A;ATRX;BCR;BRCA2;CD44;CDC20;CSN1S1;DKC1;ELN;F8;FANCA;FANCC;FANCD2;FANCG;FANCI;FBN1;FGFR1;FLII;FLNA;GTF2I;HDAC9;HLA-A;JAK1;JAK2;LRBA;LYST;MMRN1;MTHFD1;MYH10;MYH9;NCAM1;NIPBL;NOP10;OCRL;PAFAH1B1;PHGDH;PTPN11;RAD51;RARA;RPS19;RRM1;SF3B1;SMARCAL1;SRC;SRSF2;SSB;STAT1;TP53;UBE2T;XPR1;YWHAE
Abnormal skeletal development	0.030178	12	DCHS1;FLNA;GNAS;HSPG2;IFT140;IFT172;LEMD3;NOTCH2;PEX1;PEX5;SEC23A;SEC24D		Embryonal Carcinoma	0.000470845	42	ABCA1;AKT1;BRAF;CCND1;CDK4;DNMT1;EGF;EGFR;EWSR1;GPC3;GSTP1;HDAC1;HIST1H4A;HIST1H4B;HIST1H4C;HIST1H4D;HIST1H4E;HIST1H4H;HIST1H4I;HIST1H4K;HLA-A;HLA-C;HMGA1;KDM3A;MCL1;MDM2;MIB1;MKI67;NOTCH1;NRIP1;OTX2;PCNA;PTCH1;PTEN;RBL2;TP53;TRRAP;TSC2;UBE3B;VCL;VCP;VIM
Werner Syndrome	0.0303668	15	ABL1;ATR;BLM;BRCA1;CREBBP;DHX9;FANCD2;FN1;INSR;MMRN1;MTOR;PARP1;POLD1;RPA1;WDTC1		Fleshy earlobes	0.000470845	6	EFTUD2;ELN;FGD1;GJA1;NOTCH2;PIK3CA
Congenital hypoplasia of thymus	0.0303668	5	ARVCF;ATM;GRIP1;PEX5;SEC24C		Malignant neoplasm of fallopian tube	0.000470845	6	BRCA1;BRCA2;EGFR;NBR1;NF2;TP53
Histiocytoma, Benign Fibrous	0.0303668	5	EWSR1;FUS;MCM2;MIB1;MKI67		Kyphosis deformity of spine	0.00047374	33	AKT1;ALMS1;ATP7A;BAZ1B;CLIP2;CTBP1;CUL4B;ELN;FBN1;GNAS;GTF2I;HERC2;HSPG2;NOTCH3;NSD2;OCRL;PARP1;PIK3CA;POLD1;PTCH1;PTEN;PTPN11;RAB3GAP2;RFC2;ROR2;RUNX2;SEC24D;SNRPB;TSC2;UBA1;UTRN;WASHC5;ZBTB20
Malignant tumor of peritoneum	0.0303668	5	BRCA1;BRCA2;NUP214;PARP1;VCAN		Chromosomal Instability	0.000489886	10	APC;AURKA;BRAF;CKAP5;KIF11;POLG;PPP2R2A;RB1;RPS3;TP53
Pyothorax-Associated Lymphoma	0.0303668	5	ATM;ATR;FLNB;SMC2;SMC4		androgen independent prostate cancer	0.000491525	34	AGO2;AKT1;AR;BUB1;CCND1;CDKN1A;DDR1;EGF;EGFR;EPHB2;ERBB2;ESR1;FASTKD2;GLI2;HIF1A;HSP90AA1;IARS;LEF1;MAPK1;NOS2;NPEPPS;NR3C1;PBX1;PCNA;PDZD2;PIK3CA;PIK3CB;PPARG;PPP2CA;PTEN;RUNX2;STAT3;TP53;VIM
Self Mutilation	0.0303668	5	BCOR;CREBBP;EP300;HERC2;RAI1		T-Cell Lymphoma	0.000494742	61	ABCC4;AKT1;ARID1A;ATM;ATR;AURKB;BCOR;CAV1;CD44;CDK4;CTNNB1;CUL1;DICER1;DLL1;EGFR;EIF2AK2;EOMES;EP300;EPHA3;ESPL1;FGFR1;HIF1A;HNRNPC;HSPA4;JAK1;JAK2;KDM2B;KMT2D;LCK;LEF1;LONP1;LRP1;MGA;MKI67;MSH6;MTOR;MTR;MUM1;MYC;NAV3;NCAM1;NOS2;NOTCH1;NPM1;PCNA;PPARG;PTPRK;RARA;RB1;RPSA;STAT3;STAT5B;TBC1D9;TIAM1;TP53;TPT1;TXN;VDR;YY1;ZEB1;ZMYM2
pediatric acute myeloblastic leukemia	0.030538	14	ABCA3;AFDN;ATM;BCR;CREBBP;KAT6B;KDM5A;KMT2A;NSD1;NUP98;PRDM16;PTPN11;STAT3;TBC1D9		Stage IV Bladder Cancer AJCC v6	0.000511474	9	AKT1;CAV1;ERBB2;GLI2;MTOR;PIK3CA;PIK3CB;RRM1;SHH
Leukemia, Lymphocytic, Acute, L1	0.0305822	42	ABCA1;ABCC4;ABL1;ACACA;APAF1;ASPM;ATF7IP;ATM;BCR;BIRC6;CASP8AP2;CREBBP;CTCF;EP300;FAT1;HDAC2;HIF1A;IGF2R;JAK1;KMT2A;LIG3;MAP4;MGA;MSH3;MSH6;MTHFD1;MTOR;MTR;NOTCH1;NSD2;PARP1;PPP2R3A;PTPN11;PTPRG;RALGAPB;RFC1;SMARCA1;SPAG9;TBC1D9;TOP2A;WNK1;XRCC5		Carcinoma, Small Cell	0.000512399	28	AR;AURKA;BIRC5;CCND1;CD44;CHEK1;CREBBP;EGFR;EML4;ERBB2;FGFR1;GSTP1;IGF1R;MAP2;MLH1;MSH6;MTOR;NCAM1;PIK3CA;PIK3CB;PPARG;PTEN;SMAD4;SMARCA1;SMARCA2;SMARCA4;TP53;TTF1
DYSFUNCTION - SKIN DISORDERS	0.0305822	180	AARS;ABCA1;ABCA3;ABCC4;ACTN4;ADGRV1;ADNP;AGTPBP1;ALMS1;ALS2;AMPH;ANK2;AP3B1;APAF1;APC;ARHGEF2;ATF7IP;ATM;ATP13A2;ATP1A1;ATP2B1;ATP2B4;ATP7A;ATR;ATRX;BAZ1B;BRCA1;BRCA2;BUB1;CABIN1;CAPN1;CCAR2;CHD7;CLIP2;CREBBP;CRMP1;CTCF;CTNNB1;CUL1;DAXX;DCAF1;DCTN1;DHX16;DICER1;DIS3;DNMT1;DROSHA;DSP;DYNC1H1;EHMT1;EHMT2;EIF2AK4;EOMES;EPHA3;EPHB2;ERBB2;EWSR1;F8;FANCD2;FBN1;FGFR1;FIG4;FN1;FUS;GARS;GRK2;HDAC3;HDAC6;H…		Teratoma	0.000512399	28	AKT1;AR;BIRC5;BRCA1;CALM1;CALM2;CALM3;CBX5;ESR1;FGFR1;GSTP1;HDAC1;HIF1A;HMGA1;LSM2;MCL1;MYC;NCAM1;NOTCH1;PCNA;PROM1;PTEN;PTPN13;SENP1;SIRT1;SNAP91;TP53;TRRAP
Mammary Ductal Carcinoma	0.0308244	10	BCAR1;CSE1L;CTNND1;ERBB2;HIF1A;MIB1;MKI67;MMRN1;NOTCH3;UBR5		Metastatic Prostate Carcinoma	0.000513058	47	ABCA1;ABCC4;AKT1;AR;BCAR1;CAV1;CD44;CDH1;CDK2;CDK5;CDKN1A;CHD8;CSE1L;CTBP1;CTCF;CTNND1;EEF1A1;EGF;EGFR;ERBB2;HDAC1;HIF1A;HSP90AA1;HSPG2;JAG1;JAK1;MAPK8;MCM7;MYC;NGF;NME1;NPEPPS;PCBP2;PIK3CA;PIK3CB;PKN1;PPP2R1A;PPP2R2C;PREX1;PRKD1;PTEN;RNF20;RUNX2;SENP1;TP53;VIM;YBX1
Gait abnormality	0.0311146	21	ATM;CASK;DYNC1H1;FIG4;FLII;FLNA;FUS;HSPG2;KIAA0556;LRP5;LYST;MFN2;MTR;NOTCH3;OPA1;PNPLA6;RAI1;SBF1;UBA1;VCP;VPS13A		Chorioretinal dystrophy	0.000513706	5	CREBBP;EP300;PNPLA6;RNF216;VPS13B
Hereditary Nonpolyposis Colorectal Cancer	0.0315457	17	APC;ARID1A;ATM;BLM;BRCA1;BRCA2;CTNNB1;ERBB2;HDAC2;MSH2;MSH3;MSH6;NBR1;PALB2;PIK3CA;PTPRG;ZEB1		Genital Neoplasms, Female	0.000513706	5	BRCA1;ESR1;MLH1;MSH2;TP53
Slow progression	0.0327111	16	ATP7A;DCTN1;DNAJC13;DYNC1H1;EEF2;FLNC;FN1;GARS;KIF1A;KIF1B;LRP5;MARS;MFN2;SETX;SPTBN2;SYNE1		Papillary cystic tumor	0.000513706	5	CASK;CCND1;CDH1;CTNNB1;VIM
Moderate mental retardation (I.Q. 35-49)	0.0327111	9	AFF2;ANK3;ANKRD11;CASK;CUL4B;DMXL2;HUWE1;MED13L;TCF20		Phthisis bulbi	0.000513706	5	LRP5;NIPBL;RAD21;SMC1A;SMC3
Sparse eyebrow	0.0327111	9	DSP;FIG4;JUP;KANK2;KMT2D;MEGF8;SIN3A;SOS1;SOS2		adult glioblastoma	0.000513706	5	ATRX;EGFR;H3F3A;NES;PIK3CA
Cervical Adenocarcinoma	0.0327177	11	APC;CTNNB1;ERBB2;FN1;HIF1A;HLTF;MTOR;NBR1;PHGDH;PIK3CA;STAT3		hyperparathyroid	0.000513706	5	AP2S1;CCND1;GNAS;LRP5;VDR
Lordosis	0.0327177	11	BAZ1B;CLIP2;CUL7;FLNB;GTF2I;HSPG2;KIF1A;OBSL1;RAB3GAP2;SMARCAL1;SMCHD1		Salivary Gland Neoplasms	0.00051728	21	AKT1;ASPM;BRCA1;CCND1;CDH1;ERBB2;ESPL1;FANCA;FAT1;JAG1;MDM2;MFN2;PPARG;PRKD1;PTEN;PYGB;SON;STAT3;TOP2A;TP53;VCAN
Narrow thorax	0.0327177	11	ATP7A;BCOR;DCHS1;FLNA;FLNB;HSPG2;IFT140;IFT172;INPPL1;SEC23A;UBA1		Anoxia	0.00051728	56	ACO1;AKT1;AR;ATM;ATR;AURKA;BARD1;BIRC5;BRCA1;CAD;CAPN1;CAV1;CCND1;CFTR;CREB1;CSNK2A1;CTBP1;ERBB2;ESR1;FASN;GSTP1;HDAC1;HDAC2;HIF1A;HMGA1;JAK1;JAK2;JUN;KAT2B;KDM3A;KDM4B;LCK;MAPK1;MAPK14;MDM2;MTOR;MYC;NOS2;NOTCH1;PARK7;PPP1CC;PRDX1;RUNX2;SMAD3;SMC1A;SP1;SPHK1;SRC;SREBF1;STAT1;STAT3;STAT5B;THBS1;TP53;TXN;VHL
Sarcoma, Epithelioid	0.0327177	7	ARID1A;CIC;EWSR1;FN1;MIB1;MKI67;SMARCA1		Pheochromocytoma	0.00051728	56	ACACA;AGL;ATF4;ATRX;BIRC5;BMS1;CCND1;CD44;CDC42;CNR1;CREBBP;DOCK11;EGF;ERBB2;FARP1;FN1;FNDC3A;GNAS;HIF1A;HRAS;HSP90AA1;IGF1R;INSR;JAK1;KIF1B;KMT2D;MAPK14;MDM2;MIB1;MKI67;MLH1;MSH2;MTOR;MYC;NF1;NF2;NGF;NR3C1;PIK3CA;PIK3CB;PROM1;PTPRF;PTPRU;RAC1;RASA1;RB1;RICTOR;RPS6KB1;RPTOR;SERPINH1;SETD2;SMAD2;STAT3;TET1;TP53;VHL
Therapy-Related Leukemia	0.0327177	7	APC;BCR;CREBBP;FN1;KMT2A;MSH2;TOP2B		Failure to thrive in infancy	0.000523825	14	BAZ1B;BRAF;CLIP2;ELN;FGFR1;FLII;GTF2I;HERC2;HRAS;POLA1;PTPN11;RAI1;RFC2;UBA1
Trigeminal Neuralgia	0.0327177	7	BRCA1;CTNNB1;ERBB2;JAG1;PARP1;STAT3;TP53BP1		Pointed chin	0.000523825	14	ACTG1;ANKRD11;BAZ1B;BCR;CLIP2;CUL7;ELN;FLNA;GTF2I;HRAS;MAPK1;MEIS2;OBSL1;RFC2
Hydrocephalus	0.0327814	26	CC2D2A;CENPF;CTNND1;DLG5;FGFR1;FLNA;GLI2;GRIP1;HDAC6;IFT122;KIF1A;KMT2D;MED12;NES;NF1;NOTCH1;NOTCH2;OGDH;PCM1;PIK3CA;PPP2R1A;PPP2R5D;PTCH1;SEC24D;SIN3A;WASHC5		Radially deviated fingers	0.000523825	14	ANKRD11;ATRX;BCOR;BRAF;FGD1;IGF1R;MED12;PHGDH;PIK3R1;PTPN11;ROR2;SF3B4;SIN3A;SMAD4
Facial asymmetry	0.0333786	8	ATR;CHD7;GNAS;NBAS;PIK3CA;PPP2R1A;SIN3A;SLC12A6		keratoacanthoma	0.000523825	14	APC;BRAF;CCND1;CD44;CDKN1A;CTNNB1;HRAS;MLH1;MSH2;MSH6;PCNA;PIK3CA;THBS1;TP53
Hereditary Malignant Neoplasm	0.0336886	12	APC;ATM;BLM;BRCA1;BRCA2;ERBB2;MSH2;MSH6;NF2;PALB2;TOPBP1;WDTC1		Huntington Disease	0.000525399	104	ABCA1;AKT1;APAF1;APC2;APEX1;AR;ATF7IP;ATM;ATRX;BRCA1;BTRC;CALM1;CALM2;CALM3;CAV1;CCT2;CDK5;CDKN1A;CNR1;CREB1;CREBBP;CRK;CUL1;EGF;EIF2AK2;EIF4E;EPHB2;FAM193A;FBN1;FEN1;FMR1;FUS;GIT1;GSK3B;H2AFX;HDAC1;HDAC2;HDAC3;HDAC4;HDAC6;HDAC9;HIP1;HSP90AA1;HSPA4;HSPA8;HSPD1;HTT;IRS2;KDM5C;MAP1S;MAP3K1;MAPK1;MAPK14;MAPK8;MFN2;MLH1;MSH2;MSH3;MTR;NCAM1;NDUFA1;NF2;NGF;NPEPPS;NSF;NUP214;NUP43;PCM1;PCNA;PHGDH;PHLPP1…
Polyhydramnios	0.0337743	14	BUB1;CHD7;CREBBP;EP300;FIG4;FLNB;HSD17B4;INPPL1;KAT6B;LONP1;PHGDH;PLEC;SIN3A;TTC37		Idiopathic pulmonary arterial hypertension	0.00053919	50	ABCC4;AKT1;ALMS1;AR;ATF4;ATP5A1;CAPN1;CAV1;CRMP1;EGF;EIF2AK4;EPHB2;ESR1;FBN1;FGFR1;FIG4;FLNA;GJA1;GLI3;H2AFX;HIF1A;HMGA1;JAK2;MALAT1;MAPK1;MFN2;MSH2;NCOA2;NOS2;NOTCH1;NOTCH3;PARP1;PPARG;PROM1;PTPN11;RACK1;ROCK2;RPSA;SETD2;SMAD2;SMAD3;SOD1;SRC;STAT3;THBS1;TOPBP1;TP53;TP53BP1;TPT1;UTRN
Hyperactive behavior	0.0337743	83	ABCA1;ABL1;ADAR;ADNP;AFF2;ANK3;APC;ATM;ATR;ATRX;BCR;BLM;BRCA1;BRCA2;CHD2;CKAP2;COPA;CREBBP;CUL4B;DMXL2;DNMT1;EHMT2;ELFN1;EP300;EPHA3;EPHB2;ERBB2;ESPL1;FASN;FLNA;FLNB;GIT1;GLDC;GLI3;GNAS;GRK2;HERC2;HIF1A;HK1;HTT;IGF1R;KMT2A;LRP6;LRPPRC;MED1;MED12;MFN2;MGEA5;MTOR;MYO5A;NCOR1;NF1;NF2;NOTCH3;NUP214;NUP98;OBSCN;PARP1;PER1;PIK3CA;PIK3CB;PKN1;PLXNA2;PNPLA6;PTCH1;PTPN11;RAI1;RB1;SART3;SBNO1;SIN3A;STAT1;S…		Pituitary Neoplasms	0.000564823	53	AKT1;BRAF;CCND1;CDH1;CDKN1A;CREB1;CRK;CTBP1;DDR1;DNMT1;EGF;EGFR;EPHB2;ERBB2;ESPL1;ESR1;GNAS;GRK2;GSTP1;HIF1A;HMGA1;HNRNPK;IGF1R;MAP2;MAPK1;MAPK14;MAPK8;MTOR;NCAM1;NES;NGF;NME1;NR3C1;PBX1;PCNA;PIK3CA;PIK3CB;POLD1;PPARG;PROM1;PTEN;PTTG1;RB1;RUNX2;SETD2;SHH;SKP2;SMS;SRSF1;STAT3;TOP2A;TP53;XPR1
Acute Promyelocytic Leukemia	0.0341567	48	ABCA1;ABL1;ASXL1;ATRX;BCAR1;BCOR;BCORL1;BCR;BLM;CAD;CTCF;DAXX;DHX9;EHMT2;EIF4G2;EPHB2;ERBB2;FGFR1;GLI2;HIF1A;HK1;HSPG2;JAG1;JAK1;KMT2A;MTOR;MYCBP2;NCOR1;NCOR2;NOTCH1;NUMA1;NUP214;NUP98;ODC1;PIK3CA;PIK3CB;POLD1;PTPN11;SF3B1;SMARCA4;STAT1;STAT3;STAT5B;TBC1D9;TOP2B;XAB2;XPR1;ZBTB16		Medulloblastoma, Childhood	0.000571439	15	EGFR;EPHB2;ERBB2;GLI2;GLI3;GSTP1;KMT2B;KMT2D;MYC;PLK1;PROM1;PTCH1;SHH;SMARCA4;TP53
Transitional cell carcinoma of bladder	0.0343027	19	APAF1;APC;CTNNB1;EP300;EPHB2;ERBB2;HIF1A;MCM2;MSH2;MSH3;MSH6;MTR;PIK3CA;PTCH1;RB1;RSF1;SPAG9;STAT3;XPO5		Curvature of digit	0.000572881	19	ANKRD11;ATRX;BCOR;BRAF;DCHS1;FGD1;GJA1;HERC2;IGF1R;MED12;PHGDH;PIK3R1;PTPN11;RBM10;ROR2;SF3B4;SIN3A;SMAD4;SMC1A
X- linked recessive	0.0343027	17	AFF2;ATP7A;ATRX;CUL4B;F8;FGD1;FLNA;HCFC1;KDM5C;KIF4A;MED12;OCRL;PHKA2;RBM10;TAF1;UBA1;USP9X		Hepatoblastoma	0.00059356	45	ABCA1;AKT1;AMER1;APC;AXIN1;BIRC5;BTRC;CCNB1;CCND1;CD44;CDKN1A;CTNNB1;DLL1;EGFR;ERBB2;ESR1;FN1;GLI3;GPC3;HLA-C;HSPG2;IGF1R;INSR;MAPK8;MDM2;MLH1;MSH2;MYC;PCNA;PIK3CA;PIK3CB;PLK1;POLD1;PPARG;PROM1;PTCH1;PTPN11;PTPN13;RRM1;SF3B1;SHH;SREBF2;TBC1D9;TP53;YY1
Osteochondrodysplasias	0.0354169	20	AMER1;CREBBP;DCHS1;FLNA;FLNB;GNAS;HSPA9;HSPG2;IFT140;IFT172;LEMD3;NOTCH2;NUP214;PEX1;PEX5;ROR2;SEC23A;SEC24D;SH3PXD2B;STAT1		Cystadenoma	0.000595409	16	APC;BRAF;BRCA1;DOCK1;ERBB2;HIF1A;MIB1;MKI67;PARP1;PIK3CA;PIK3CB;PLK1;PTEN;TP53;TSC2;VHL
Undifferentiated leukemia	0.0354169	10	BCR;EPHA3;GLI2;KDM1A;KDM5B;KMT2A;NUP214;SALL4;STAT5B;TBC1D9		Polyp of large intestine	0.000599921	17	AKT1;APC;BRAF;CD44;DICER1;DNMT1;EIF4E;GSTP1;MLH1;MSH2;MSH6;PAK1;PIK3CA;POLD1;PPARG;PTEN;SEC23B
Wide anterior fontanel	0.0354169	10	CREBBP;DCHS1;EP300;FLNA;LRP2;MED12;PEX1;PEX5;ROR2;SEC23A		Tumors of Adrenal Cortex	0.000599921	17	APC;BRAF;BUB1B;CDK2;CDK4;CTNNB1;DDX5;DLGAP5;GNAS;MDM2;NF1;PCNA;PPARG;SHH;THBS1;TOP2A;TP53
Highly variable severity	0.0362245	21	AARS;APC;COL4A2;CREBBP;EP300;FIG4;GLI2;GLI3;GNAS;KIF1A;KIF5C;MARS;MFN2;NF2;PFKM;POLG;PTCH1;RARS;SETX;SPAST;SPTAN1		Atrial Septal Defects	0.000602333	31	ARVCF;BCOR;BRAF;CHD7;CREBBP;EFTUD2;EP300;FBN2;FGFR1;FLNB;GPC3;HRAS;HSPG2;JAG1;KAT6A;KAT6B;KMT2D;LONP1;MED12;NOTCH2;NSD2;PHGDH;PTEN;PTPN11;RPS19;RTN4;SEC24C;SHROOM3;TSHZ1;TXNL4A;WASHC5
Variable expressivity	0.0362245	21	AARS;APC;COL4A2;CREBBP;EP300;FIG4;GLI2;GLI3;GNAS;KIF1A;KIF5C;MARS;MFN2;NF2;PFKM;POLG;PTCH1;RARS;SETX;SPAST;SPTAN1		Chordoma	0.000606877	22	AKT1;AR;BRAF;EGFR;EIF4E;EPHB2;ERBB2;ESR1;FGFR1;HDAC4;HIF1A;MAPK1;MKI67;MSH3;MTOR;PIK3CA;PIK3CB;PTEN;STAT3;TBC1D9;TP53;TSC2
Cardiac defects	0.036693	11	CHD7;CPS1;FLNA;HIF1A;JAG1;MTR;NOTCH1;PTPN11;SETD2;SOS1;WNK1		Myotonic Dystrophy	0.000628739	32	ABCA1;AKT1;AMPH;AR;ATP2B1;BUB1;CCT3;CDC42BPA;CDC42BPB;CLIP2;CTCF;DDX5;FEN1;FMR1;HNRNPA1;INSR;MLH1;MSH2;MSH3;MTMR1;MYLK;NF1;NUP214;PLCB1;PTBP1;RAN;RANGAP1;SLU7;SOD1;SPEN;SRRM2;SRSF2
Broad-based gait	0.036693	6	CAD;COL4A3BP;CUL4B;KMT2A;PEX5;UBE3A		Delayed Puberty	0.000631883	26	ATM;CDON;CHD7;CUL4B;FGD1;FGFR1;HERC2;INSR;MAP3K1;PNPLA6;POLG;POLR3A;POLR3B;PTPN11;RAB3GAP2;RBM28;RPL11;RPL26;RPL35A;RPS17;RPS19;RPS24;RPS28;RPS29;RPS7;STAT1
Fundus coloboma	0.036693	6	BCOR;CHD7;KDM2B;SALL1;SALL2;ZNF423		Hepatitis C	0.000638836	116	ABCA1;ACSL3;ADAR;AGO2;AKT1;AP1B1;AP2M1;APAF1;AR;ARID2;ASPM;ATM;CABIN1;CDC42;CDK2;CDKN1A;CLIP2;CNR1;CRK;CTNNB1;DCLK1;DDB1;DDR1;DDX46;DHX16;DHX58;DNMT1;DYNC1H1;EGF;EGFR;EIF2AK2;EIF2S2;EIF3A;EIF4A1;EIF4A2;EIF4E;EIF4G1;EPHA3;EPHB2;ERC1;ESR1;FASN;FLNB;FN1;GBF1;GLI3;GPC3;GPX1;GRB2;HDAC9;HDDC2;HIST1H1B;HLA-A;HLA-C;HNRNPD;HNRNPK;HNRNPL;HRAS;HSPA4;HSPA8;IRS1;JAG1;JAK1;KIDINS220;KIF1B;KRT8;LCK;LSAMP;MAPK1;…
Hypoplastic toenails	0.036693	6	BAZ1B;CLIP2;CPT2;FGFR1;GTF2I;INPPL1		Cardiac conduction abnormalities	0.000654518	21	BRAF;CPT2;CREBBP;ELN;EP300;GPC3;HRAS;KAT6B;PTPN11;RPL11;RPL26;RPL35A;RPS17;RPS19;RPS24;RPS28;RPS29;RPS7;SOS1;SOS2;SYNE2
Klatskin Tumor	0.036693	6	HIF1A;HK1;PIK3CA;PIK3CB;SETD2;TBC1D9		EKG abnormalities	0.000654518	21	BRAF;CPT2;CREBBP;ELN;EP300;GPC3;HRAS;KAT6B;PTPN11;RPL11;RPL26;RPL35A;RPS17;RPS19;RPS24;RPS28;RPS29;RPS7;SOS1;SOS2;SYNE2
Sloping shoulders	0.036693	6	BAZ1B;BCOR;CLIP2;CUL4B;GTF2I;PTCH1		Electrocardiogram change	0.000654518	21	BRAF;CPT2;CREBBP;ELN;EP300;GPC3;HRAS;KAT6B;PTPN11;RPL11;RPL26;RPL35A;RPS17;RPS19;RPS24;RPS28;RPS29;RPS7;SOS1;SOS2;SYNE2
bilateral breast cancer	0.036693	6	ATM;BRCA1;BRCA2;ERBB2;LRP2;PALB2		Hypoplastic feet	0.000654518	21	CENPE;COL4A3BP;CUL4B;FBN1;FGD1;FGFR1;FMR1;GJA1;GPC3;HDAC4;HDAC6;HERC2;IFT140;IFT172;INPPL1;KDM5C;NIPBL;RAD21;ROR2;SMC1A;SMC3
Adult Acute Myeloblastic Leukemia	0.036693	14	ASXL1;BCORL1;BCR;CEBPZ;HIF1A;KMT2A;MSH3;MTOR;NF1;NUP98;PTPN11;SF3B1;TBC1D9;THADA		Acute respiratory failure	0.000673341	13	ATM;BCR;CDK4;HUWE1;IGF1R;MDM2;NOTCH1;NPM1;PARP1;PTEN;SHH;TP53;WDTC1
22q11 partial monosomy syndrome	0.036693	4	ARVCF;JMJD1C;PI4KA;SEC24C		Autosomal Recessive Polycystic Kidney Disease	0.000673341	13	AKT1;CFTR;EGFR;MCM3;MTOR;PCNA;PIK3CA;PKD1;PRKD1;PXN;SLC4A2;SRC;TSC2
Abnormal mental state	0.036693	4	GBA2;KIAA1109;SPG11;ZFYVE26		LEOPARD Syndrome	0.000673341	13	AKT1;BRAF;EGF;EPHB2;IRS1;MAPK1;MTOR;NF1;PIK3CA;PIK3CB;PTEN;PTPN11;SOS1
Abnormal upper motor neuron morphology	0.036693	4	FUS;POLR3A;POLR3B;SETX		Leiomyosarcoma of uterus	0.000673341	13	AKT1;APC;AURKA;BRCA1;BUB1B;CTNNB1;EP300;ERBB2;MDM2;MED12;PIK3CA;SRC;TP53
Abnormality of the abdominal wall	0.036693	4	APC;CTNNB1;HSPG2;INSR		Low anterior hairline	0.000673341	13	ANKRD11;CREBBP;EP300;LRPPRC;NIPBL;PACS1;RAB3GAP2;RAD21;SLC12A6;SMARCA2;SMC1A;SMC3;TECPR2
B-cell adult acute lymphoblastic leukemia	0.036693	4	ABL1;BCR;PIK3CA;PIK3CB		Strawberry nevus of skin	0.000673341	13	AKT1;CREBBP;CTCF;EP300;JAG1;MTOR;NOTCH3;PTEN;RASA1;RPS6;SEC23A;TP53;VHL
Breast Fibrocystic Change, Proliferative Type	0.036693	4	ERBB2;PPP2R1A;PTPRG;TIMELESS		Gallbladder Carcinoma	0.000685382	43	AKT1;APC;BIRC5;CALM1;CALM2;CALM3;CD44;CDK2;CTNNB1;EGFR;EPHB2;ERBB2;ESR1;FEN1;GNL3;GPC3;HDAC1;HDAC9;HIF1A;HLA-A;HSPD1;MAPK1;MAPK8;MLH1;MSH2;MSH3;MYC;NOS2;PHB;PHLPP1;PIK3CA;PIK3CB;PROM1;ROBO1;SKP2;SMAD4;ST8SIA4;TBC1D9;TIMP2;TP53;TRO;VIM;WDTC1
Cancer of Digestive System	0.036693	4	HIF1A;MTR;SETD2;STAT3		Abnormality of the urinary system	0.000686488	11	MYH9;ROBO2;RPL11;RPL26;RPL35A;RPS17;RPS19;RPS24;RPS28;RPS29;RPS7
Elfin facies	0.036693	4	BAZ1B;CLIP2;GTF2I;INSR		Cornelia De Lange Syndrome	0.000686488	11	ANKRD11;CTCF;KMT2A;MYC;NIPBL;PDS5A;PDS5B;RAD21;SMC1A;SMC3;TNKS
Fanconi Syndrome	0.036693	4	ABCC4;IGF2R;LRP2;OCRL		Papillary serous cystadenocarcinoma	0.000686488	11	BRAF;BRCA1;BRCA2;CCND1;CDKN1A;ERBB2;INTS2;MAPK8;MSH3;TBC1D9;TP53
Fibromatosis	0.036693	4	APC;CTNNB1;FN1;TOP2A		Poorly differentiated carcinoma	0.000686488	11	AR;BRAF;CREBBP;NME1;NOTCH1;PPARG;SHH;SMAD4;STAT3;TAF1;TP53
Gastric adenoma	0.036693	4	APC;ERBB2;GNAS;LRPPRC		Macrostomia	0.000686488	23	ACTG1;ANKRD11;ARID1A;ATRX;BAZ1B;CLIP2;CUL4B;ELN;FRAS1;GPC3;GTF2I;INSR;MED12;PIK3CA;RFC2;ROR2;SEC23A;SF3B4;SMARCA2;SMARCA4;TTC37;UBE3A;ZNF592
Glomus Tumor	0.036693	4	NF1;NOTCH1;NOTCH2;NOTCH3		Polyhydramnios	0.000686488	23	BRAF;BUB1;BUB1B;CHD7;CREBBP;EP300;FIG4;FLNB;GPC3;HRAS;HSD17B4;INPPL1;ITGA6;KAT6B;LONP1;OTX2;PAFAH1B1;PHGDH;PLEC;SIN3A;SNRPB;TTC37;YWHAE
Hypoplastic lobules	0.036693	4	ARVCF;FIG4;PTPRF;SEC24C		Uterine Cervical Neoplasm	0.000686967	37	APEX1;BIRC5;CCND1;CDC42;CDC6;CDH1;CDKN1A;CTNNB1;EGFR;GIT1;GSN;GSTP1;HIF1A;HLA-A;HLA-C;KMT2A;MDM2;MTOR;MTR;MYC;NOTCH1;NOTCH2;PCNA;PIK3CA;PLXNB1;PTEN;RFC1;SF3B6;SMAD2;SMAD4;SPAG9;SRSF1;SRSF2;STAT3;TOP2A;TP53;YY1
Malignant Female Reproductive System Neoplasm	0.036693	4	BRCA1;BRCA2;JAK1;NBR1		Polycystic Kidney Diseases	0.000724602	28	BIRC6;BUB1B;CFTR;CPT2;EGF;EGFR;EPHB2;ERBB2;ETFA;GSK3B;HDAC6;HIF1A;JUN;KIF3A;MAPK1;MTOR;MYC;PEX5;PKD1;PRKD1;PROM1;SOD1;SP1;STAT3;TMEM2;TSC2;VHL;ZNF423
Non-Hereditary Clear Cell Renal Cell Carcinoma	0.036693	4	HIF1A;PBRM1;SETD2;VCAN		Epilepsy	0.000733508	164	ADGRV1;AGO2;AKT1;ANK2;ANKRD11;ARFGEF2;ARID1A;ATM;ATP5A1;ATP7A;ATR;ATRX;BCOR;BRAF;CACNA1H;CAD;CALM1;CALM2;CALM3;CAMSAP2;CASK;CCDC88A;CENPE;CHD2;CNN3;CNR1;COL4A2;CPS1;CPT2;CREB1;CREBBP;CTBP1;CUL4B;CYFIP1;DIAPH1;DPM1;DPYSL3;DYNC1H1;ELFN1;ELN;EML1;EP300;EPG5;EPHA3;EPHB2;ESR1;FASTKD2;FGFR1;FIG4;FLNA;FMR1;FN1;GJA1;GLDC;GLI2;GLI3;GNAS;GPX1;GRIA2;HDAC4;HDAC9;HIP1;HLA-A;HRAS;HSD17B4;HSPA4;HSPD1;HTT;IFT140…
Partial agenesis of corpus callosum	0.036693	4	CENPE;GLI2;LRP2;MED12		Benign melanocytic nevus	0.000733508	19	BRAF;CCND1;CDK4;CDKN1A;EGF;EGFR;ERBB2;GPC3;HRAS;LEF1;LRP2;MCM3AP;MDM2;MYC;NOS2;PARP1;PPARG;PTCH1;TP53
Partial or complete agenesis of corpus callosum	0.036693	4	CENPE;GLI2;LRP2;MED12		Congenital clinodactyly	0.000733508	19	ANKRD11;ATRX;BCOR;BRAF;DCHS1;FGD1;GJA1;HERC2;IGF1R;MED12;PHGDH;PIK3R1;PTPN11;RBM10;ROR2;SF3B4;SIN3A;SMAD4;SMC1A
Pelvic kidney	0.036693	4	BAZ1B;CLIP2;FGFR1;GTF2I		Hepatocellular Adenoma	0.000740291	14	AKT1;APC;CARM1;CTNNB1;EGF;GPC3;HRAS;IGF2R;LRPPRC;MTOR;PTEN;SREBF1;STAT3;TP53
Small thymus	0.036693	4	ARVCF;ATM;PEX5;SEC24C		Sarcoma, Clear Cell	0.000740291	14	BCOR;BRAF;CREB1;CREBBP;EGFR;EWSR1;HIF1A;MLH1;MSH2;MSH6;MYC;PPARG;PTEN;SETD2
Malignant neoplasm of brain	0.0371203	21	ABCA1;ABCA2;ATM;DDR1;ERBB2;EXTL3;FGFR1;HK1;INSR;KDM1A;MTR;NF2;PIK3CA;PIK3CB;PRKDC;SFMBT1;STAT3;TIMELESS;XRCC5;XRCC6;ZEB1		Frontotemporal dementia	0.000750107	33	ABL1;CDC7;CHAF1A;CTR9;CTSC;DCTN1;DNMT1;FLNC;FMR1;FUS;GSK3B;HNRNPA1;HNRNPA2B1;MAP4K4;NEFM;NOS2;NUP214;PIK3R4;PTBP1;RAB3GAP2;RAN;RNPS1;SETX;SOD1;SPG11;SRRM2;SRSF3;SRSF9;TAF15;TBK1;UNC13A;VCP;WASHC5
Abnormality of earlobe	0.0371203	3	BCR;CUL4B;GLI3		Congenital pes cavus	0.000755647	26	AARS;ATP7A;COX6A1;CUL4B;DYNC1H1;FBN1;FGFR1;GARS;HSD17B4;KARS;KIF1B;KIF5A;MFN2;MORC2;PCNA;PEX5;POLG;SACS;SETX;SYNJ1;VCP;VPS13A;WASHC5;ZBTB20;ZFYVE26;ZNF592
Acinar cell carcinoma of pancreas	0.0371203	3	APC;BRCA1;BRCA2		Cervical Adenocarcinoma	0.000763461	18	APC;BRAF;CDH1;CTNNB1;EGF;ERBB2;FN1;HIF1A;HLTF;MTOR;NBR1;NME1;PHGDH;PIK3CA;PTEN;SDC1;STAT3;TP53
Atrophic spinal cord	0.0371203	3	CCT5;MFN2;PNPLA6		Distal sensory impairment	0.000763461	18	AARS;CAV1;CCT5;COX6A1;DYNC1H1;FIG4;GARS;IARS2;KARS;KIF1B;KIF5A;MARS;MFN2;MORC2;POLG;SACS;SBF1;VCP
Axillary freckling	0.0371203	3	MSH2;MSH6;NF1		Low posterior hairline	0.000763461	18	ANKRD11;BRAF;CREBBP;CTBP1;EFNB1;EP300;KAT6B;NF1;NIPBL;NSD2;PTPN11;RAB3GAP2;RAD21;SMC1A;SMC3;SOS1;SOS2;WASHC5
Breast Diffuse Large B-Cell Lymphoma	0.0371203	3	MIB1;MKI67;MUM1		Myxoid/Round Cell Liposarcoma	0.000779434	15	APC;CDK4;EWSR1;FUS;HSP90AA1;MDM2;MTOR;PIK3CA;PIK3CB;PPARG;PTBP1;SRRM2;TAF15;TP53;YBX1
Corneal abnormalities	0.0371203	3	CREBBP;EP300;MEGF8		Chronic otitis media	0.000784999	17	ALMS1;ARVCF;BAZ1B;CHD7;CLIP2;ELN;FLII;FMR1;GTF2I;MYH9;PIK3R1;RAI1;RFC2;ROR2;RUNX2;SEC24C;STAT3
Cornela disease	0.0371203	3	CREBBP;EP300;MEGF8		Nervous System Neoplasms	0.000784999	17	AKT1;BIRC5;BRAF;EGF;ENC1;ERBB2;GNL3;MDM2;MYC;NAV3;NES;NF2;NGF;RB1;TOP2A;TP53;VHL
Cryptophthalmos syndrome	0.0371203	3	FRAS1;FREM2;GRIP1		Neoplasm, Residual	0.000784999	36	ABL1;AFDN;BCR;BRAF;CALR;CASP8AP2;CCND1;CEBPZ;CEP85L;DLL1;EPHB2;ERBB2;ESR1;EWSR1;FN1;FUS;GNL3;HDAC9;JAK2;KMT2A;MAPK1;MCL1;MSH3;MYC;NCAM1;NOTCH1;NPM1;NUP214;NUP98;PBX1;PTEN;PTPN11;RARA;SDC1;TP53;YY1
Curly eyelashes	0.0371203	3	NIPBL;RAD21;SMC3		oligodendroglioma	0.000789326	40	ACLY;APC;ARHGAP35;ATRX;AURKA;BIRC5;BRAF;CAV1;CD44;CDH1;CDK2;CDK4;CIC;CREB1;CSE1L;EGFR;GSTP1;HNRNPA1;LRIG1;MDM2;MIB1;MKI67;MSH6;NES;NOTCH1;NOTCH2;PARP1;PCNA;PDE3B;PIK3CA;PRDX6;PTEN;PTPRZ1;RAC1;RASA1;RTN4;SMARCA2;SMARCA4;THBS1;TP53
Duodenal atresia	0.0371203	3	CENPF;CHD7;SALL1		Open mouth	0.000789326	16	AKT1;ATRX;BRAF;CCDC88A;DST;ELN;FLII;HNRNPK;KIF1A;MED12;PLXND1;PPP2R1A;PPP2R5D;RAI1;REV3L;SIN3A
Familial meningioma	0.0371203	3	MN1;NF1;NF2		Hamartoma Syndrome, Multiple	0.000790633	30	AKT1;AR;BRCA1;BRCA2;CAV1;CDK7;CFTR;DDR1;EGF;EGFR;FN1;GJA1;GPX1;HSPA4;JAK2;KIF3A;MAPK8;MTOR;NR3C1;PIK3CA;PIK3CB;PTEN;PTK2;SEC23B;SERPINH1;SMAD4;STAT5B;TJP1;TP53;TSC2
Fundic gland polyp	0.0371203	3	APC;CTNNB1;GNAS		Human Papillomavirus Positive Oropharyngeal Squamous Cell Carcinoma	0.000790633	7	EGFR;HRAS;PIK3CA;PIK3CB;PTEN;STAT1;TP53
Neural tube defect, folate-sensitive	0.0371203	3	LRP6;MTHFD1;MTR		Hyperacusis	0.000790633	7	BAZ1B;CLIP2;ELN;FLII;GTF2I;RAI1;RFC2
Nikolsky sign	0.0371203	3	ATP2C1;DSP;JUP		Lobular Neoplasia	0.000790633	7	CDH1;CTNND1;ESR1;HSP90AA1;MYC;PCNA;PROM1
Ovarian Fibromata	0.0371203	3	MIB1;MKI67;PTCH1		Phonophobia	0.000790633	7	BAZ1B;CLIP2;CREBBP;ELN;EP300;GTF2I;RFC2
Pectus excavatum inferiorly	0.0371203	3	NF1;PTPN11;SOS1		Metastatic Carcinoma	0.000790633	10	AR;BRAF;BRCA1;EGFR;ERBB2;GSN;MALAT1;PLXND1;RXRA;TP53
Phocomelia	0.0371203	3	GNAS;NIPBL;SMC3		Neoplasms, Neuroepithelial	0.000790633	10	APC;BCOR;BRAF;CDH1;IGF2BP1;MAP2;MDM2;MPRIP;TOP2A;TOP2B
Premature development of the breasts	0.0371203	3	CREBBP;EP300;KMT2D		Ovarian epithelial cancer recurrent	0.000790633	10	BRCA1;BRCA2;CD44;NBR1;NF2;PAK1;PARP1;STAT5B;TP53;WDTC1
Premature tooth eruption	0.0371203	3	APC2;INSR;SETD2		Sloping shoulders	0.000790633	10	BAZ1B;BCOR;CLIP2;CUL4B;EFNB1;ELN;GTF2I;PTCH1;RFC2;RUNX2
Slender fingers	0.0371203	3	ATRX;EFTUD2;ZNF592		bilateral breast cancer	0.000790633	10	AR;ATM;BRCA1;BRCA2;ERBB2;ESR1;LRP2;PALB2;PTEN;TP53
Spinocerebellar ataxia type 31	0.0371203	3	SACS;SETX;SYNE1		Conduction disorder of the heart	0.000798373	21	BRAF;CPT2;CREBBP;ELN;EP300;GPC3;HRAS;KAT6B;PTPN11;RPL11;RPL26;RPL35A;RPS17;RPS19;RPS24;RPS28;RPS29;RPS7;SOS1;SOS2;SYNE2
Tethered Cord Syndrome	0.0371203	3	CREBBP;EP300;NSD2		Parathyroid Adenoma	0.000798373	21	ATRX;BCAR1;CALM1;CALM2;CALM3;CAV1;CCND1;CDKN1A;CSE1L;CTNNB1;CTNND1;ESR1;LRP2;LRP5;NF1;PCNA;RAD51;SMAD3;TBC1D9;TP53;VDR
Undifferentiated spindle cell sarcoma	0.0371203	3	BCOR;KMT2B;KMT2D		Acoustic Neuroma	0.000828161	25	AKT1;APEX1;BRAF;CAV1;CCND1;CDKN1A;CHEK1;EGFR;ERBB2;GPX1;GSTP1;HRAS;KARS;MDM2;MSH2;NF1;NF2;PARP1;PCNA;POLB;PTEN;RAD51;RB1;SOD1;TP53
adult glioblastoma	0.0371203	3	ATRX;NES;PIK3CA		Mixed Salivary Gland Tumor	0.000828161	25	AR;BRCA1;CCND1;CD44;CDK4;CENPF;EGFR;EIF4E;ERBB2;FBXW11;HIF1A;HRAS;JAK2;MDM2;NCOA1;NCOR1;PCNA;PIK3CA;PRDX1;PTEN;SDC1;SRC;STAT3;TIMP2;TP53
Foot dorsiflexor weakness	0.0371203	7	AARS;KARS;KIF1B;LYST;MARS;MFN2;SMCHD1		Broad thumbs	0.000834466	12	CREBBP;EP300;FGFR1;FLNA;FLNB;GLI3;GPC3;MED12;MEGF8;ROR2;SALL1;USP9X
Foot-drop	0.0371203	7	AARS;KARS;KIF1B;LYST;MARS;MFN2;SMCHD1		Cystic Fibrosis	0.000856172	87	ASAP1;ATF7IP;ATP5E;BPTF;BRCA1;CALM1;CALM2;CALM3;CAV1;CDKN1A;CFTR;CLCN3;CREBBP;CRK;CSNK2A1;DNER;EGF;EGFR;EPHA3;EPHB2;ESR1;EZR;F8;FBN1;FLNA;FLNC;FN1;GLI3;GSTP1;H2AFX;HDAC6;HIF1A;HIST1H4A;HIST1H4B;HIST1H4C;HIST1H4D;HIST1H4E;HIST1H4H;HIST1H4I;HIST1H4K;HLA-C;HSP90AA1;HSPA4;HSPA8;HSPA9;HSPD1;HSPG2;INTS1;JUN;KRT8;LPCAT1;MAPK1;MAPK14;MAPK8;MGEA5;MSH3;MYC;NME1;NOS2;NR3C1;NUP214;PIK3CA;PIK3CB;PKD1;PLCB3;PL…
Hereditary nonpolyposis colorectal carcinoma	0.0371203	7	APC;ATM;CTNNB1;EP300;MSH2;MSH6;PIK3CA		Respiratory distress	0.000864357	20	ABCA3;ADCY6;CPT2;CREB1;CREBBP;DPM1;EFTUD2;EGFR;EP300;ETFA;FASTKD2;FGFR1;KAT6A;MEGF10;NPC2;ORC1;OTX2;PIK3C2A;RPS28;STAT5B
Mask-like facies	0.0371203	7	ATP13A2;ATP7A;DCTN1;HSPG2;PLXND1;REV3L;SMCHD1		Brain Ischemia	0.000884568	58	ABCA1;AP3B1;AR;ATM;BAZ1B;CALM1;CALM2;CDK5;CELSR1;CLIP2;CREB1;DMXL2;EIF2AK2;EIF3E;ELN;ESR1;GJA1;GPX1;GTF2I;HEATR5B;HIF1A;HSPA8;HSPA9;IGF1R;JAK2;JUN;KALRN;KMT2A;LTA4H;MAP2;MAPK1;MAPK14;MKI67;MTHFD1;MTR;NOS2;NOTCH3;PARP1;PHLPP1;PPARG;PRKACB;PRRC2A;RB1;RELA;RFC2;RUVBL2;SNX19;SOD1;SPTB;STAT3;STRN;TP53;TXN;UBR3;VDR;WDTC1;WNK1;ZFHX3
Highly variable clinical phenotype	0.0371203	23	ATRX;CHD7;DHTKD1;DYNC1H1;GNAS;HSD17B4;KIF5A;NDUFS1;NIPBL;NOTCH1;OPA1;PNPLA6;POLG;POLR3A;POLR3B;RAD21;SIN3A;STAT1;SYNE1;SYNE2;TSC2;ZFYVE26;ZNF423		Giant Cell Glioblastoma	0.000885924	9	AURKB;BRAF;BUB1;EGF;EGFR;FGFR1;PPARG;PTEN;TP53
Highly variable phenotype and severity	0.0371203	23	ATRX;CHD7;DHTKD1;DYNC1H1;GNAS;HSD17B4;KIF5A;NDUFS1;NIPBL;NOTCH1;OPA1;PNPLA6;POLG;POLR3A;POLR3B;RAD21;SIN3A;STAT1;SYNE1;SYNE2;TSC2;ZFYVE26;ZNF423		Periventricular Nodular Heterotopia	0.000885924	9	ARFGEF2;DLL1;FLNA;FMR1;MAP3K4;NEDD4L;PAFAH1B1;WDTC1;YWHAE
Highly variable phenotype, even within families	0.0371203	23	ATRX;CHD7;DHTKD1;DYNC1H1;GNAS;HSD17B4;KIF5A;NDUFS1;NIPBL;NOTCH1;OPA1;PNPLA6;POLG;POLR3A;POLR3B;RAD21;SIN3A;STAT1;SYNE1;SYNE2;TSC2;ZFYVE26;ZNF423		Neuroectodermal Tumor, Primitive	0.000889597	29	APC;ATRX;BCOR;BTRC;CCND1;CDK2;CDK4;CDK9;CTNNB1;DICER1;EGFR;EWSR1;FLII;HRAS;IGF1R;MAP2;MED1;MYC;NF1;NOTCH2;PCNA;PHF5A;PTCH1;SHH;SMARCA5;SMS;SRC;TBC1D9;TP53
Phenotypic variability	0.0371203	23	ATRX;CHD7;DHTKD1;DYNC1H1;GNAS;HSD17B4;KIF5A;NDUFS1;NIPBL;NOTCH1;OPA1;PNPLA6;POLG;POLR3A;POLR3B;RAD21;SIN3A;STAT1;SYNE1;SYNE2;TSC2;ZFYVE26;ZNF423		Pick Disease of the Brain	0.000895169	26	CDC42;FMR1;FUS;GSK3B;HNRNPA1;HTT;IRS1;MAP4K4;NEFM;NGF;NPC2;NUP214;PARK7;PRDX1;PRDX6;PTBP1;PTCH1;RAN;RNPS1;SOD1;SRSF9;TBK1;UBB;UNC13A;VCP;WASHC5
Borderline ovarian tumour	0.0372364	5	BRCA1;BRCA2;DNMT1;ERBB2;NCOA3		Anaplastic thyroid carcinoma	0.000896658	37	AKT1;APC;ATM;AURKB;BRAF;CAV1;CCND1;CD44;CDK2;CDKN1A;CTNNB1;DNER;EGFR;EPHB2;ERBB2;HMGA1;IGF1R;IQGAP1;MADD;MAPK1;MSH2;NME1;PATZ1;PCNA;PIK3CA;PIK3CB;PJA2;PLK1;PPARG;PTCH1;PTEN;SHH;SRC;STAT3;TAF1;TBC1D9;TP53
Curly hair (finding)	0.0372364	5	COL4A3BP;JUP;SOS1;SOS2;TTC37		Immunologic Deficiency Syndromes	0.000896658	89	ABL1;AGL;AKT1;AP3B1;APBB1;AR;ARVCF;ATM;BRAF;BRCA1;CALR;CCND1;CD44;CFTR;CMAS;DKC1;EGF;EGFR;ELN;EPG5;EPHB2;ERBB2;EWSR1;F8;FASN;FAT1;FBXO11;FN1;GJA1;GLI2;HLA-C;HRAS;HSPH1;IPO7;JAK2;KDM5B;KMT2A;KMT2D;LCK;LEF1;LRBA;LYST;MAPK1;MCM3AP;MTOR;MYC;NES;NF2;NOTCH1;NPM1;PARP1;PIK3CA;PIK3CB;PIK3R1;PLEC;PLK1;PNP;POLE;POMP;PPARG;PPP2R1A;PRKDC;PROM1;PTEN;PXN;RAC1;RARA;RUVBL2;SALL2;SALL4;SDC1;SEC24C;SIN3A;SIRT1;SMC…
Inverted Papilloma	0.0372364	5	FGFR1;MIB1;MKI67;MSH2;MSH6		Atypical Endometrial Hyperplasia	0.000900639	8	ARID1A;CTNNB1;CTNND1;MLH1;MSH2;PCNA;PTEN;TP53
Multinodular goiter	0.0372364	5	ALMS1;CLTC;DICER1;PTCH1;TRIM24		Condyloma	0.000900639	8	CDKN1A;ERBB2;ESR1;JUN;MIB1;MKI67;PCNA;TP53
Pulmonary Valve Stenosis	0.0372364	5	JAG1;NF1;PTPN11;SOS1;STAT3		Pyothorax-Associated Lymphoma	0.000900639	8	ATM;ATR;FLNB;HLA-A;HLA-C;SMC2;SMC4;TP53
Renal Artery Stenosis	0.0372364	5	HIF1A;KIF1B;NF1;SETD2;STAT1		Small labia majora	0.000900639	8	NIPBL;ORC1;ORC4;RAB3GAP2;RAD21;ROR2;SMC1A;SMC3
Spade-like hand	0.0372364	5	BCOR;FBN1;FGD1;FGFR1;RAI1		Electrocardiogram abnormal	0.000909156	22	ANK2;BRAF;CPT2;CREBBP;ELN;EP300;GPC3;HRAS;KAT6B;PTPN11;RPL11;RPL26;RPL35A;RPS17;RPS19;RPS24;RPS28;RPS29;RPS7;SOS1;SOS2;SYNE2
Luminal A Breast Carcinoma	0.0372364	15	BRCA1;DICER1;DNMT1;ERBB2;ESPL1;FGFR1;IGF1R;IGF2R;LRPPRC;MAP3K1;NCOA3;PARP1;PIK3CA;STAT3;ZNF217		Skin Carcinogenesis	0.000919655	30	AKT1;AR;AURKA;CCND1;CD44;CDK2;CDK4;EGFR;ERBB2;FANCD2;GPX1;HRAS;NOTCH1;NSD1;ODC1;PARP1;PPARG;PTEN;RAC1;SDC1;SHH;SMAD2;SMAD3;SMAD4;STAT1;STAT3;THBS1;TP53;TP53BP1;TXN
Pancreatic carcinoma	0.0372364	149	ABCA1;ABCC4;ACO1;ACTN4;ADAR;AP2A1;APAF1;APC;ARHGEF2;ARID1B;ARID2;ATM;BRCA1;BRCA2;BRD7;BRD8;BUB1;CAPN1;CCDC88A;CHD1;CHD3;CHD7;CLTC;COL4A2;CREBBP;CRMP1;CTNNB1;CTNND1;CUL7;DCAF1;DDR1;DICER1;DNMT1;DPYSL3;EEA1;EPHB2;ERBB2;EXOC2;FANCD2;FBN2;FBXW11;FGFR1;FLNA;FN1;GLI3;GRK2;GSN;HDAC2;HDAC3;HEATR1;HIF1A;HNRNPU;HSPA4;HSPD1;HSPG2;HSPH1;IARS;IGF1R;IGF2R;IMMT;INSR;IQSEC1;IRS2;JAG1;JAK1;KANK2;KDM1A;KDM2B;KIF14…		Congestive heart failure	0.000929611	112	ACTN4;AKT1;ALMS1;ANK2;ANXA2;ARID1A;ATM;ATP2B4;ATP5A1;BRCA1;BRD1;CAD;CALM1;CALM2;CALM3;CALR;CD44;CDK9;CDKN1A;CLCN3;CPT2;CRK;CRMP1;CTTN;DDR1;DNER;DSP;EGFR;ELN;EPHA3;ERBB2;ERBIN;ESR1;FBN1;FLNA;GIT1;GJA1;GNL2;GOLGB1;GRK2;GSN;HADHA;HDAC4;HDAC5;HIF1A;HLA-C;HNRNPD;HSPA4;HSPG2;HTT;JARID2;JUP;KDM5B;KIF1B;LONP1;LRPPRC;MALAT1;MAPK1;MAPK14;MAPK8;MFN2;MGEA5;MMRN1;MTOR;MYLK;NCAM1;NES;NGF;NNT;NOS2;NOTCH3;NR3C1;…
Malignant neoplasm of urinary bladder	0.0372364	120	ABCA1;ABCC4;AGL;APAF1;APC;ARVCF;ATG2B;ATM;ATR;BCR;BLM;BRCA1;BRCA2;CCAR2;CDH2;CHAF1A;CTCF;CTNNB1;CUL3;DICER1;DLG5;DNMT1;DROSHA;EIF3A;EIF3B;EIF4G2;EOMES;ERBB2;FANCD2;FGFR1;FLNA;FN1;FYN;GAS1;GEMIN4;GLI2;GNAS;GSN;HADHA;HDAC2;HIF1A;HSD17B4;HSPA4;IGF1R;IGF2R;INSR;IQGAP1;IRS2;KDM4B;KDM5B;KIDINS220;KIF20B;KMT2A;LIG3;LRIG1;LRP5;LRP6;LZTS1;MAP4;MDC1;MIB1;MKI67;MSH2;MSH3;MSH6;MTA2;MTOR;MTR;MYO5A;NCOA3;NCOR1…		Macrocephaly	0.000941008	13	AKT1;BRWD3;CHD8;HERC1;LEMD3;LRP5;MTOR;PIK3CA;PIK3CB;PPP2R5D;PTEN;RPS19;TSC2
Depressed nasal ridge	0.0372364	10	APC2;ARID1A;ATRX;GLI2;HDAC6;HSPG2;PTPN11;SETD2;SMARCA4;TTC37		Milroy Disease	0.000941008	13	AKT1;BCR;BRAF;CCND1;CKS1B;GJA1;KIF11;MDM2;MYC;NCAM1;PTEN;RB1;TP53
Reduced visual acuity	0.0372364	10	AP3B1;FBN2;LRP5;LYST;NBAS;OCRL;OPA1;PRPF6;SALL2;ZFYVE26		Abnormally small eyeball	0.000943167	27	BCOR;BUB1;BUB1B;CHD7;FANCA;FANCC;FANCD2;FGFR1;GJA1;GLI2;GLI3;GRIP1;HDAC6;HRAS;LRP5;NOTCH1;OCRL;OTX2;PHGDH;PIK3CA;PTCH1;RAB3GAP2;RB1;SHH;SIN3A;SMCHD1;ZNF592
Sloping forehead	0.0372364	10	ATR;CENPE;CPT2;GLI3;KIF11;KIF14;LTBP4;PCNT;PHGDH;ZNF592		Decreased size of eyeball	0.000943167	27	BCOR;BUB1;BUB1B;CHD7;FANCA;FANCC;FANCD2;FGFR1;GJA1;GLI2;GLI3;GRIP1;HDAC6;HRAS;LRP5;NOTCH1;OCRL;OTX2;PHGDH;PIK3CA;PTCH1;RAB3GAP2;RB1;SHH;SIN3A;SMCHD1;ZNF592
Turner Syndrome, Male	0.0372364	10	ARHGEF2;EPHB2;KAT6B;NF1;PTPN11;PTPRU;SOS1;SOS2;STAT3;STAT5B		Hernia, Inguinal	0.000943167	27	AR;ATP7A;BAZ1B;CLIP2;CUL4B;ELN;FGD1;FGFR1;GPC3;GTF2I;HSPG2;INSR;LTBP4;MED12;NIPBL;NOTCH2;NOTCH3;PIK3R1;POLA1;RFC2;ROR2;RPS27A;SERPINH1;SIN3A;SMAD3;TIMP2;UBA1
Coarse facial features	0.0375687	17	AP3B1;ARID1A;ATRX;BAZ1B;CLIP2;CUL4B;FLNA;GNAS;GTF2I;HUWE1;INSR;KAT6B;MED12;NOTCH2;PTCH1;SMARCA4;STAT3		Multiple Endocrine Neoplasia Type 1	0.000943167	27	ACACA;APC;ATRX;BMS1;BRCA2;CAPN1;CCND1;CDK4;CDKN1A;DAXX;EIF4EBP3;FAU;GNAS;GSTP1;HRAS;INTS2;MTOR;PCNA;PIK3CA;PIK3CB;PLCB3;PPP1CA;PTCH1;SMAD3;TP53;VDR;VHL
Thickened facial skin with coarse facial features	0.0375687	17	AP3B1;ARID1A;ATRX;BAZ1B;CLIP2;CUL4B;FLNA;GNAS;GTF2I;HUWE1;INSR;KAT6B;MED12;NOTCH2;PTCH1;SMARCA4;STAT3		Intermittent migraine headaches	0.000962906	18	MLH1;MSH2;MSH6;NF2;NOTCH3;PIK3CA;POLG;RPL11;RPL26;RPL35A;RPS17;RPS19;RPS24;RPS28;RPS29;RPS7;SMAD4;VHL
Frontotemporal dementia	0.0378587	20	ABL1;CHAF1A;CTR9;DCTN1;DNMT1;FLNC;FUS;MAP4K4;NEFM;NOS2;NUP214;PIK3R4;RAB3GAP2;SETX;SPG11;SRRM2;TAF15;UNC13A;VCP;WASHC5		Scoliosis, unspecified	0.000962906	18	ATP2B4;CALM1;CHD7;ELN;ESR1;FBN1;FBN2;FBN3;NF1;NOTCH1;PTPN11;RASA1;RUNX2;SMAD3;SPAST;STAT3;TIMP2;VDR
Malignant lymphoma, lymphocytic, intermediate differentiation, diffuse	0.0383303	37	ARHGAP29;ARID1A;ATM;ATR;BCR;CDC42BPA;CTCF;CTNNB1;DAXX;FASN;GLI2;HDAC6;HSPA4;LATS2;LRPPRC;MAP2;MAP4K4;MCM6;MIB1;MKI67;MSH2;MTOR;MUM1;NOTCH1;NOTCH2;PARP1;PCNT;PDE3B;PIK3CA;PIK3CB;RB1;STAT1;STAT3;TOP2A;UBR5;WDTC1;ZEB1		Autosomal Dominant Disorder	0.000969281	32	APC;ATP2C1;BRCA1;BRCA2;CHD7;DCTN1;DSP;FBN1;FBN2;FTL;GJA1;HTT;JAG1;MLH1;MSH2;MSH6;MYH9;NF1;NOTCH3;PABPN1;PLEC;PTCH1;PTEN;PTPN11;RASA1;RUNX2;SHH;SMAD4;SOD1;TSC2;VCP;WNK1
Multiple tumors	0.0387641	13	APC;BRCA1;BRCA2;CTNNB1;CUL1;DICER1;ESPL1;HSPA4;KIF5B;MSH2;NF2;PTCH1;UTRN		Myelofibrosis	0.000990279	21	ABL1;AKT1;ASXL1;BCR;CALR;CDK2;FN1;JAK1;JAK2;NCOR2;NR3C1;PAFAH1B1;RARS;SF3B1;SRSF2;STAT3;STAT5B;THBS1;TP53;YWHAE;ZMYM2
Undifferentiated carcinoma	0.0387641	13	BRCA1;CTNNB1;ERBB2;FBN2;FN1;MSH2;NBR1;PIK3CA;PPP2R1A;PTCH1;SMARCAL1;STAT3;WNK1		Amyloidosis	0.000997451	130	ABCA1;ABCA2;APAF1;APBB1;APEX1;ATF4;BCR;BRCA1;BRCA2;CAV1;CD44;CDK4;CDK5;CLCN3;CNR1;CREB1;CRK;CRMP1;CTNND2;DCAF1;DDR1;DNMT1;EEA1;EGF;EGFR;EIF2AK4;EPHA3;EPHB2;EPS15;ERBB2;ESR1;FANCD2;FN1;FUS;GRAMD4;GRK2;GSK3B;GSN;GSTP1;HDAC2;HDAC6;HLA-C;HSP90AA1;HSPA4;HSPA9;HSPD1;HSPG2;HSPH1;HTT;IARS;IDE;IGF1R;IGF2R;IMMT;INSR;IRS1;KLC1;LRP1;LRP2;LRP5;MALAT1;MAML3;MAP2;MAPK1;MAPK14;MAPK8;MARK4;MEGF10;MGEA5;MPRIP;NAE1…
Lung Neoplasms	0.0388242	105	ABCA1;ABCC4;ABL1;ACLY;AMPH;APC;ATM;BAG6;BLM;BRCA2;BUB1;CAD;CDC5L;CREBBP;CTCF;CTNNB1;CTNND1;DDR1;DICER1;DNMT1;DSP;EEF2;EHMT2;EML4;EPHA3;ERBB2;ESPL1;EWSR1;FASN;FGFR1;FLNB;FN1;FUS;GSN;HADHA;HIF1A;HK1;HSPA4;HSPA8;IGF2BP1;IGF2R;JAG1;JAK1;KIF14;KIF23;KNL1;LARS;LATS2;LRP1;MAP1B;MAP3K1;MKI67;MSH2;MSH6;MTHFD1;MTOR;MTR;MYO9B;NES;NISCH;NOS2;NOTCH1;NOTCH2;NOTCH3;NSD3;PARP1;PBRM1;PCNT;PIK3CA;PIK3CB;PLCG1;POLE…		ATRICHIA WITH PAPULAR LESIONS	0.000997451	14	ABCA1;FGFR1;HK1;HLA-C;LEF1;NPM1;ODC1;PPARG;PROM1;RARA;RXRA;TOP2B;VDR;ZBTB16
Respiratory distress	0.0388675	12	ABCA3;ADCY6;CPT2;CREBBP;EFTUD2;EP300;FASTKD2;FGFR1;KAT6A;ORC1;PIK3C2A;STAT5B		LIMB-MAMMARY SYNDROME	0.000997451	14	ELN;ESR1;JAK1;MED12;MYLK;NUP214;PTEN;PTK2;ROR2;SRC;STAT3;TP53;TYRO3;VCAN
West Syndrome	0.0388675	12	ARFGEF2;BRWD3;FLNA;HSD17B4;MTOR;NF1;PTCH1;SOS1;SPTAN1;SPTBN2;TSC2;WDTC1		Short palpebral fissure	0.000997451	14	BRCA2;DCHS1;FANCA;FANCC;FANCD2;FANCG;FANCI;GJA1;ORC1;POLR1A;RAD51;RBM10;TXNL4A;UBE2T
T-Cell Lymphoma	0.0403906	37	ABCC4;ARID1A;ATM;ATR;BCOR;CTNNB1;CUL1;DICER1;EOMES;EP300;EPHA3;ESPL1;FGFR1;HIF1A;HSPA4;JAK1;KDM2B;KMT2D;LONP1;LRP1;MGA;MKI67;MSH6;MTOR;MTR;MUM1;NAV3;NOS2;NOTCH1;PTPRK;RB1;STAT3;STAT5B;TBC1D9;TIAM1;ZEB1;ZMYM2		Bushy eyebrows	0.000997451	17	ANKRD11;ARID1A;BCOR;CREBBP;CUL7;EP300;IARS2;KMT2A;NBAS;NIPBL;NOTCH2;OBSL1;RAD21;SMAD4;SMARCA4;SMC1A;SMC3
Atrial Premature Complexes	0.0408752	15	APC;APC2;BLM;BRCA1;BRCA2;CTNNB1;GLI3;HDAC2;MSH3;NES;ODC1;PALB2;PTCH1;RB1CC1;SPEN		Lymphangioleiomyomatosis	0.000997451	17	CALM1;CALM2;CALM3;CD44;DDR1;EGF;EPHB2;ESR1;GJA1;HIF1A;MAPK1;MTOR;PARP1;RPS6;RPS6KB1;STAT3;TSC2
Hypodontia	0.0408752	15	BAZ1B;CLIP2;DSP;FGD1;FGFR1;FLNB;GLI3;GTF2I;KMT2D;LRP6;NSD2;PIK3R1;POLR3A;POLR3B;TRIM37		Mitral Valve Prolapse Syndrome	0.000997451	17	BAZ1B;BCOR;BRAF;CLIP2;DCHS1;ELN;FBN1;FBN2;FLNA;FMR1;GNAS;GTF2I;HRAS;POLG;PTPN11;RFC2;SMAD3
Breast Cancer, Familial	0.0409675	20	AKAP13;ATM;BCORL1;BLM;BRCA1;BRCA2;CENPE;CLSPN;EP300;ERBB2;FANCD2;HIF1A;MAGED2;MSH2;MSH3;MSH6;PALB2;PARP1;PER1;PTPRG		Central Nervous System Neoplasms	0.00100223	23	APC;ATRX;BCOR;BRAF;BRCA2;DDR1;EGFR;EPHB2;ERBB2;FGFR1;HDAC9;KAT2B;MAPK1;MSH2;MTR;MYC;NES;NF1;NF2;PARP1;PROM1;RFC1;TP53
Creatine phosphokinase serum increased	0.0409732	17	AGL;BAZ1B;CLIP2;CPT2;FLNC;GTF2I;HSPG2;NOTCH3;OCRL;PLEC;POLG;SETX;SMCHD1;SYNE1;SYNE2;VCP;VPS13A		Soft Tissue Neoplasms	0.00100223	23	AKT1;APC;CDK4;CDKN1A;CIC;CTNNB1;EGFR;ERBB2;EWSR1;FLII;FUS;GNAS;MDM2;MED12;MIB1;MKI67;MSH2;NF1;PKP2;RB1;STAT3;TBC1D9;TP53
Elevated creatine kinase	0.0409732	17	AGL;BAZ1B;CLIP2;CPT2;FLNC;GTF2I;HSPG2;NOTCH3;OCRL;PLEC;POLG;SETX;SMCHD1;SYNE1;SYNE2;VCP;VPS13A		Erythroblastosis	0.00102187	15	AR;CAV1;CCND1;CD44;EGF;EGFR;ERBB2;EWSR1;GSN;JUN;MIB1;MTOR;NPEPPS;PTEN;VDR
Adult T-Cell Lymphoma/Leukemia	0.0412683	46	ABL1;APC;ASPM;ATF7IP;ATM;BCR;BUB1;CREBBP;CTCF;EIF4G2;EPHB2;FN1;FYN;GEMIN4;GSN;IARS;IFT172;JAK1;KMT2C;LRP1;MAGI1;MSH2;MSH3;MSH6;MUM1;NOS2;NOTCH1;PIK3CA;PIK3CB;PLCG1;PRDM16;PSMD2;PTPN13;RTN4;SMARCA4;SPTAN1;STAT1;STAT3;STAT5B;TARS;TBC1D9;VCP;WDTC1;WNK1;ZEB1;ZNF282		Ovarian Serous Adenocarcinoma	0.00102187	15	APC;AURKA;AURKB;BRAF;BRCA1;BRCA2;BUB1;CALR;GSN;NF1;NOTCH3;PIK3CA;PKN1;RSF1;TP53
Endometrial Carcinoma	0.0413846	73	AFDN;APC;ARID1A;ATAD2;ATM;BRCA1;BRCA2;BRD7;CAD;CREBBP;CTCF;CTNNB1;CTNND1;DDR1;DICER1;DNMT1;DROSHA;EP300;EPHB2;ERBB2;FANCD2;FASN;HIF1A;HSD17B4;IGF1R;IGF2R;INSR;INTS2;IPO8;JAK1;KDM4A;KDM4B;LLGL1;LRP1;LRPPRC;MAP3K1;MSH2;MSH3;MSH6;MTOR;NBR1;NCOA2;NCOA3;NES;NOTCH1;NRIP1;PARP1;PER1;PIK3CA;PIK3CB;PIK3R1;PKN1;PLXNA1;POLD1;POLE;PPP2R1A;PRKDC;RB1;RBL2;SALL4;SCRIB;SETD2;SMARCA1;SREBF1;STAT3;TBC1D9;THADA;TNK…		Paget Disease Extramammary	0.00102187	11	AKT1;AR;CDH1;CTNNB1;ERBB2;MAPK1;NCL;PIK3CA;PIK3CB;PTK2;TP53
Tremor	0.0414345	26	ADAR;ATM;ATP7A;BAZ1B;CABIN1;CLIP2;CUL4B;DCTN1;DNAJC13;FIG4;FLNA;FUS;GTF2I;LEMD3;LRP2;LRPPRC;LYST;POLG;SETX;SPAST;SPG11;SREBF1;SYNJ1;TAF1;VPS13A;VPS35		Lymphoma, Follicular	0.00104152	63	ABCA1;ABL1;AKT1;AMPH;APC;APEX1;ARID1A;ATM;BCR;BRCA1;BRCA2;CCNB1;CCND1;CD44;CDK4;CDKN1A;CHEK1;CREBBP;DROSHA;EML4;EPHA7;ESR1;GPX1;GSTP1;KMT2A;KMT2B;KMT2D;LONP1;MAPK1;MAPK14;MCL1;MDM2;MIB1;MKI67;MLH1;MSH2;MTHFD2;MTOR;MTR;MUM1;MYC;NOS2;NOTCH1;NOTCH2;PCNA;PIK3CA;PIK3CB;PLK1;PTEN;RB1;SDC1;SKP2;SRSF3;STAT1;STAT3;STAT5B;TBC1D9;TP53;TPT1;TYRO3;USP9X;VDR;VIM
Motor delay	0.0416324	22	AP3B1;BCOR;DMXL2;DYNC1H1;FASTKD2;FBN1;FBN2;FLNA;HERC2;IARS2;IGF1R;MED12;NOTCH3;PHKA2;PLEC;PLXND1;PTCH1;REV3L;SLC12A6;SMARCAL1;UBE3A;ZNF592		Henoch-Schoenlein Purpura	0.00110635	24	ABCA1;CFTR;GBA2;HLA-A;HLA-C;HSPA4;HSPD1;KIF1A;KIF1B;KIF1C;KIF5A;KIF5B;KIF5C;NOS2;PNPLA6;SEC24D;SLC1A2;SPAST;SPG11;TECPR2;TIMELESS;VCP;WASHC5;ZFYVE26
No development of motor milestones	0.0416324	22	AP3B1;BCOR;DMXL2;DYNC1H1;FASTKD2;FBN1;FBN2;FLNA;HERC2;IARS2;IGF1R;MED12;NOTCH3;PHKA2;PLEC;PLXND1;PTCH1;REV3L;SLC12A6;SMARCAL1;UBE3A;ZNF592		Systemic Scleroderma	0.00111006	80	ABL1;AKT1;ATM;BLM;CAV1;CBL;CD44;CDC42;CEBPZ;CENPE;CNR1;CRK;DDX46;DHX16;DLL1;DNMT1;EGF;EGFR;EPHB2;ESR1;EXOSC10;FBN1;FLII;FN1;GLI3;GSK3B;HIF1A;HIST1H4A;HIST1H4B;HIST1H4C;HIST1H4D;HIST1H4E;HIST1H4H;HIST1H4I;HIST1H4K;HLA-A;HLA-C;HRAS;HSP90AA1;HSPA4;ITGB8;JUN;LRPPRC;MAPK1;MAPK14;MCM7;MMRN1;MYC;NOS2;PIK3C2B;PIK3CA;PIK3CB;PLCL2;POLR3A;PPARG;PTBP1;RELA;RNPS1;SERPINH1;SHH;SIRT1;SMAD2;SMAD3;SMAD4;SNRNP70;S…
Trichohepatoenteric Syndrome	0.0417498	30	ABL1;ALS2;APC;ATM;ATR;ATRX;BUD13;CREBBP;EHMT1;EP300;FBN1;FGFR1;GLI3;HSPA4;HUWE1;INSR;LPIN2;LYST;MSH2;MSH6;NSD1;PTCH1;RAI1;SRRM2;STAT5B;TTC37;TTF1;UBE3A;VPS13B;ZMYM2		Non-Neoplastic Disorder	0.00111526	83	AGO2;AKT1;ANXA2;APC;AR;AURKA;BCR;BRAF;BRCA1;BRCA2;BTRC;CAV1;CCNB1;CCND1;CD44;CDC6;CDH1;CDK4;CDKN1A;COL4A2;CPT2;CTNNB1;DNMT1;DOCK7;EGF;EGFR;ERBB2;EZR;FLII;FN1;GSTP1;HDAC2;HIF1A;HNRNPA2B1;HRAS;HSP90AA1;IGF1R;JAG1;JAK2;KDM1A;KDM5B;KIF14;LAMA1;LONP1;LPCAT1;LRIG1;MAPK8;MCL1;MCM7;MLH1;MSH2;MSH3;MYC;MYO6;NAA15;NEO1;NF1;NME1;NOTCH3;NPM1;PCNA;PEG10;PIK3CA;PLK1;PLXNB1;PPARG;PRDX1;PRDX6;PROM1;PTEN;RARA;SF3B…
Joint stiffness	0.0417498	14	BAZ1B;CLIP2;FBN1;FBN2;FLNA;GTF2I;HSPG2;LEMD3;MFN2;NIPBL;RAB3GAP2;RAD21;SMC3;UBA1		Gastritis	0.00112778	32	ABL1;ACACA;ADGRL1;ADGRL2;APEX1;ARID1A;ATM;BMS1;CAV1;CCND1;CD44;CDH1;EGFR;HIF1A;HLA-A;HLA-C;JUN;LRBA;LRPPRC;MLH1;MSH2;NOS2;ODC1;PPARG;PROM1;RB1;SETD2;SHH;STAT3;TBC1D9;TP53;VDR
liposarcoma	0.0417498	18	APC;ATRX;DAXX;EWSR1;FASN;FUS;GNAS;MIB1;MKI67;MSH2;NF1;PIK3CA;PIK3CB;RB1;SREBF1;TAF15;TBC1D9;TOP2A		Dysplastic Nevus	0.00115667	19	BRAF;BRCA2;CCND1;CDK2;CDK4;CDKN1A;EGFR;EIF4E;EPHB2;HNRNPK;KAT5;MAPK1;MIA3;PTEN;SIRT1;STAT1;STAT3;TERF2;TP53
Mitral Valve Insufficiency	0.0417498	8	BAZ1B;CLIP2;DCHS1;FBN1;FBN2;FLNA;GTF2I;POLG		Spastic Paraplegia, Hereditary	0.00115667	19	ALS2;GBA2;HSPD1;HSPE1;IFT122;IMMT;KIF1B;KIF5A;KIF5B;KIF5C;MFN2;PNPLA6;SLC1A2;SPAST;SPG11;TECPR2;VCP;WASHC5;ZFYVE26
Ptosis	0.0417498	8	ACSL3;ACTG1;DCHS1;FBN1;KIF21A;NIPBL;POLG;ZFHX4		Big calvaria	0.00116096	37	AKT1;APC2;BRAF;CUL4B;ETFA;FMR1;GJA1;GLI3;GPC3;HDAC6;HRAS;HSD17B4;HUWE1;INPPL1;KDM5C;LRP2;LRP4;LRP5;MED12;MPDZ;NF1;NOTCH2;PEX1;PEX5;PIK3CA;PPP2R5D;PTCH1;PTEN;ROR2;SEC23A;SEC23B;SEC24D;SETD2;SOS1;TRIM37;WASHC5;ZBTB20
Seckel syndrome	0.0417498	8	ATM;ATR;BRCA1;CENPE;DNMT1;NIN;ORC1;PCNT		Increased head circumference	0.00116096	37	AKT1;APC2;BRAF;CUL4B;ETFA;FMR1;GJA1;GLI3;GPC3;HDAC6;HRAS;HSD17B4;HUWE1;INPPL1;KDM5C;LRP2;LRP4;LRP5;MED12;MPDZ;NF1;NOTCH2;PEX1;PEX5;PIK3CA;PPP2R5D;PTCH1;PTEN;ROR2;SEC23A;SEC23B;SEC24D;SETD2;SOS1;TRIM37;WASHC5;ZBTB20
Agenesis of teeth	0.0417498	6	ATR;CENPE;DSP;FGFR1;FLNA;PCNT		Increased size of cranium	0.00116096	37	AKT1;APC2;BRAF;CUL4B;ETFA;FMR1;GJA1;GLI3;GPC3;HDAC6;HRAS;HSD17B4;HUWE1;INPPL1;KDM5C;LRP2;LRP4;LRP5;MED12;MPDZ;NF1;NOTCH2;PEX1;PEX5;PIK3CA;PPP2R5D;PTCH1;PTEN;ROR2;SEC23A;SEC23B;SEC24D;SETD2;SOS1;TRIM37;WASHC5;ZBTB20
Dysphasia	0.0417498	6	ARVCF;ATRX;OCRL;RAI1;SEC24C;VCP		Increased size of skull	0.00116096	37	AKT1;APC2;BRAF;CUL4B;ETFA;FMR1;GJA1;GLI3;GPC3;HDAC6;HRAS;HSD17B4;HUWE1;INPPL1;KDM5C;LRP2;LRP4;LRP5;MED12;MPDZ;NF1;NOTCH2;PEX1;PEX5;PIK3CA;PPP2R5D;PTCH1;PTEN;ROR2;SEC23A;SEC23B;SEC24D;SETD2;SOS1;TRIM37;WASHC5;ZBTB20
Epidermolysis Bullosa	0.0417498	6	DSP;DST;ERBIN;FLII;HSPG2;PLEC		Cataract	0.00116472	74	AKT1;ALMS1;APEX1;ATM;ATP2B1;ATR;BCOR;BLM;BUB1;BUB1B;CALM1;CALM2;CALM3;CASK;CPT2;CREBBP;DKC1;EGF;EGFR;EP300;ESR1;FBN1;FIG4;FLNB;FN1;FTL;GJA1;GNAS;GPX1;GSTP1;HLA-A;HSPA4;HSPG2;IARS2;IFT140;IFT172;JAG1;KLC1;LONP1;LRP5;MRPL13;MYH9;NF2;NOTCH1;OCRL;OPA1;OTX2;PEX1;PEX5;PHGDH;PIK3CA;PIK3R1;POLG;PRDX6;PROM1;PRPF31;PRPF4;PRPF6;PRPF8;PTCH1;PTEN;RAB3GAP2;RB1;RPL13A;RPL21;SEC23A;SIPA1L3;SIRT1;SNRNP200;VCAN;VI…
Generalized elastolysis	0.0417498	6	ATP7A;FBN1;GSN;LTBP4;MEGF8;NBAS		Parkinsonian Disorders	0.00116789	45	ABL1;ATP13A2;CHAF1A;CTR9;CTSC;DCTN1;DNAJC13;EIF4G1;ESR1;FMR1;FTL;FUS;FYN;GJA1;GSTP1;HLA-A;HSPA4;HSPA9;HTR2C;LRP2;MGEA5;MTOR;NDUFS1;NDUFS4;NGF;OPA1;PARK7;PARP1;PIK3R4;POLG;PTBP1;PTEN;RAB3GAP2;SMAD3;SOD1;SPG11;SRRM2;SYNJ1;TAF1;TP53;VCP;VPS13A;VPS13C;VPS35;XPR1
Hanging skin	0.0417498	6	ATP7A;FBN1;GSN;LTBP4;MEGF8;NBAS		Biliary Tract Cancer	0.00116789	28	AKT1;APC;APEX1;AR;BRAF;CDH1;CDK2;CTNNB1;EGFR;ERBB2;ESR1;FANCD2;GMNN;IGF1R;MLH1;MSH2;MTOR;NOTCH1;NOTCH2;PIK3CA;PIK3CB;PRC1;PTCH1;RRM1;SKP2;SLC9A3R1;SMAD4;TP53
Hearing loss, progressive sensorineural	0.0417498	6	ACTG1;ALMS1;DIAPH1;IARS2;MYH9;OPA1		Hyperplasia	0.00116789	28	AKT1;APC;APEX1;AR;BLM;BRAF;CAV1;CCND1;CDH1;CDKN1A;EGFR;FN1;GJA1;GNAS;GPX1;HIF1A;IGF1R;IRS1;IRS2;KDM1A;MAPK6;PIK3CA;PTEN;PTK2;RXRA;SOD1;TP53;VDR
High grade serous carcinoma	0.0417498	6	BRCA1;BRCA2;PARP1;PPP2R1A;RSF1;TOP2A		Immunoblastic Large-Cell Lymphoma	0.0012019	12	ATM;BCR;HLA-C;MLH1;MTOR;MUM1;MYC;NCAM1;NOTCH1;SDC1;TBC1D9;TP53
Increased hepatocellular carcinoma risk	0.0417498	6	APC;CTNNB1;IGF2R;JAG1;PIK3CA;TNPO3		Primary Lesion	0.0012019	12	BRAF;EGFR;EIF3A;EML4;ERBB2;FN1;LCK;PROM1;SMAD4;STAT3;TP53;VIM
Increased incidence of hepatocellular carcinoma	0.0417498	6	APC;CTNNB1;IGF2R;JAG1;PIK3CA;TNPO3		Lupus Erythematosus, Systemic	0.00121694	143	ABCA1;ACACA;ADAR;AKT1;ANXA2;APC;AR;ARHGEF2;ATF7IP;ATM;BAG6;BCR;BMS1;CABIN1;CALR;CBL;CD44;CDKN1A;CREB1;CREBBP;DAXX;DCAF1;DDR1;DDX46;DHX16;DHX9;DLL1;DNER;DNMT1;DOCK11;EGFR;EHMT2;EIF2AK2;EIF4E;EIF4G1;EP300;EPHB2;ERBB2;ESR1;FAF1;FEN1;FLII;FN1;FYN;GLI3;GSTP1;H2AFX;HCFC1;HDAC1;HDAC9;HLA-A;HLA-C;HNRNPC;HNRNPD;HRAS;HSP90AA1;HSPA4;HSPE1;JAK1;JUN;KIDINS220;KIFC1;LAMA1;LAMC1;LCK;LSM2;MAPK1;MDC1;MED14;MTA2;M…
Mucinous Neoplasm	0.0417498	6	APC;GNAS;HIF1A;LONP1;PIK3CA;SMARCA4		Bone neoplasms	0.00122426	23	AKT1;APC;CAV1;EGFR;ERBB2;EWSR1;GNAS;HIF1A;HRAS;IGF2R;MDM2;MTR;NCOA3;NME1;NOTCH1;RELA;RFC1;RUNX2;TP53;UBL5;VIM;WNK1;YY1
Muscle weakness of limb	0.0417498	6	DYNC1H1;MFN2;POLG;SLC12A6;VCP;VPS13A		Epidermolysis Bullosa	0.00125268	10	COL17A1;DSP;DST;ERBIN;FLII;HSPG2;ITGA6;PLEC;RPS27A;TP53
Reduced number of teeth	0.0417498	6	ATR;CENPE;DSP;FGFR1;FLNA;PCNT		Focal glomerulosclerosis	0.00125273	30	ACTN4;ANK3;ASXL1;EPHB2;FN1;HLA-A;LAMB2;MAGI1;MAPK1;MYH10;MYH9;NES;NOS2;NOTCH1;PAFAH1B1;PCNA;PLCG1;PPARG;PTPRO;PTPRU;RAC1;RARA;RPL10A;SF3B1;SMAD3;SMARCAL1;TAGLN;THBS1;YWHAE;ZNF592
Simple syndactyly of toes, first web space	0.0417498	6	BCOR;COL4A3BP;FGFR1;NIPBL;SALL1;SLC12A6		Ki-1+ Anaplastic Large Cell Lymphoma	0.0012661	41	AKT1;CALM2;CCND1;CDC42;CDK9;CDKN1A;CLTC;EML4;ETFA;GLI3;GRB2;HNRNPD;HSP90AA1;INSR;JUN;MAPK14;MAPK8;MCL1;MTOR;MUM1;MYC;MYH9;NCAM1;NGF;NOS2;NOTCH1;NPM1;PIK3CA;PIK3CB;PTEN;PTPN11;RB1;RNF213;RPS6;RPS6KB1;SMG1;STAT3;TBC1D9;TP53;WDR48;YY1
CHARGE Syndrome	0.0428794	7	CHD2;CHD7;CHD8;GLI3;KDM2B;KMT2D;SALL4		DiGeorge Syndrome	0.00129881	17	ARVCF;BCR;CDC45;CECR2;CHD7;CIC;CLTC;CTNNB1;DICER1;JMJD1C;KAT6A;LAMC1;PKP4;PLXND1;SEC24C;SHH;TJP1
ESTROGEN RESISTANCE	0.0428794	7	BCAR1;ERBB2;INSR;PIK3CA;PIK3CB;RTN4;ZFYVE9		Lymphatic Abnormalities	0.00130449	6	AKT1;EPHB2;MAPK1;PIK3CA;PIK3CB;RASA1
Obesity, Abdominal	0.0428794	7	ALMS1;CREBBP;CUL4B;EP300;GNAS;HERC2;PCNT		PTEN Hamartoma Tumor Syndrome	0.00130449	6	AKT1;MTOR;NF2;PIK3CA;PIK3CB;PTEN
RENAL ADYSPLASIA	0.0428794	7	FGFR1;FRAS1;FREM2;GLI3;IFT140;JAG1;PLEC		Stage I Endometrial Carcinoma	0.00130449	6	ERBB2;MIB1;MKI67;MLH1;MSH2;TP53
Tongue Neoplasms	0.0428794	7	BRCA1;ERBB2;HIF1A;NOTCH1;PARP1;PIK3C2A;PIK3CA		Subacute progressive viral hepatitis	0.00130449	6	APC;AXIN1;CTNNB1;IGF2R;PIK3CA;TP53
Invasive Carcinoma	0.0429145	20	APC;BCAR1;BRCA1;BRCA2;CTNNB1;ERBB2;FGFR1;FYN;GNAS;GSN;IGF1R;MAST2;MIB1;MKI67;NOTCH1;PIK3CA;STAT1;STAT5B;TOP2A;TP53BP1		Neck webbing	0.00131121	13	BCOR;BRAF;CBL;GPC3;HRAS;KAT6B;NF1;PTPN11;RPS19;SMS;SNRPB;SOS1;SOS2
Decreased platelet count	0.0434298	17	ABL1;ACTN1;AP3B1;ATRX;BCR;BRCA2;FANCD2;FANCI;FLNA;LRBA;LYST;MYH9;NIPBL;OCRL;PHGDH;SMARCAL1;XPR1		Follicular adenoma	0.0013278	24	ASH1L;ATM;BRAF;CCND1;CDKN1A;ERBB2;H2AFX;HRAS;HSPG2;KMT2A;NME1;PCNA;PHB;PLK1;PPARG;PRDX1;PRDX6;PTCH1;PTEN;RUNX2;SPAG9;TP53;TP53BP1;TPT1
beta Thalassemia	0.0434298	17	ANK2;ARFGEF2;ATM;ATRX;BRCA2;CAD;DOCK11;FANCD2;FBN2;GSN;HBS1L;HSPA4;KIDINS220;NOS2;SACS;SEC23B;SPTBN1		Neurofibromatosis 2	0.00133056	20	BCR;BRCA1;CABIN1;CD44;EGF;EZR;LATS2;LRP6;MDM2;MIB1;MKI67;MN1;NF1;NF2;PAK1;PXN;RAC1;SRSF5;TP53;VHL
Fragile X Syndrome	0.0435346	15	AFF2;BCR;CTCF;CYFIP2;DICER1;FXR1;FXR2;KIAA1109;MSH2;NF1;PIK3CA;PIK3CB;PKP4;RAI1;SRRM2		Atypical Lipoma	0.0013672	14	AKT1;ATRX;CDK4;CHEK1;DAXX;EGFR;ERBB2;JUN;KNTC1;MDM2;PTEN;TNKS;TP53;TYRO3
Abetalipoproteinemia	0.0455001	9	ABL1;BCR;HADHA;HIF1A;KMT2A;MAP3K1;PIK3C2A;PTPN11;VPS13A		Malignant neoplasm of nasopharynx	0.00137363	15	ADAMTS9;ANXA2;CDH1;FLNA;GJA1;MDC1;PIK3CA;PIK3CB;PLK1;RELA;SMAD3;STAT3;TP53;WNK1;YBX1
Neurodegenerative Disorders	0.0455001	76	ABCA1;ABL1;ALS2;APAF1;APBB1;ATM;ATP13A2;ATP7A;ATR;ATRX;BAG6;BRCA2;CREBBP;CTNNB1;DCTN1;DNMT1;DYNC1H1;EIF4G2;EPG5;EPHB2;ERBB2;EWSR1;FIG4;FUS;FYN;GEMIN4;GLI3;GSN;HDAC6;HIF1A;HSPA4;HSPA9;HSPD1;HTT;KDM1A;KIDINS220;KIF1A;KIF1B;KIF20B;LRPPRC;LYST;MFN2;MGEA5;MSH2;MTOR;NBR1;NOTCH3;OGDH;OPA1;PABPC4;PARP1;PIK3CA;PIK3CB;PLXNA4;PNPLA6;POLG;PSMD1;PSMD2;PTPN13;SACS;SETX;SLC12A6;SOS1;SPAST;SPG11;SPTAN1;SPTBN2;SR…		Laryngeal Squamous Cell Carcinoma	0.00142757	25	AURKA;BRCA2;CAMSAP1;CCND1;CDKN1A;EGFR;EOMES;EPHA7;ERBB2;EZR;FN1;GJA1;HLA-A;MDM2;MLH1;PLK2;PRPF31;PTEN;PTPRD;PXN;RELA;STAT3;TIMP2;TP53;WNK1
Malignant neoplasm of pancreas	0.0455883	145	ABCA1;ABCC4;ACO1;ACTN4;ADAR;AP2A1;APAF1;APC;ARHGEF2;ARID1B;ARID2;ATM;BRCA1;BRCA2;BRD7;BRD8;BUB1;CAPN1;CHD1;CHD7;CLTC;COL4A2;CREBBP;CRMP1;CTNNB1;CTNND1;CUL7;DAXX;DCAF1;DDR1;DICER1;DNMT1;DPYSL3;EEA1;EPHB2;ERBB2;EXOC2;FANCD2;FBN2;FGFR1;FLNA;FN1;GLI3;GRK2;GSN;HDAC2;HDAC3;HEATR1;HIF1A;HNRNPU;HSPA4;HSPD1;HSPG2;HSPH1;IARS;IGF1R;IGF2R;IMMT;INSR;IQSEC1;IRS2;JAG1;JAK1;KANK2;KDM1A;KDM2B;KIF14;LIG3;LONP1;LRP…		Cervical Squamous Cell Carcinoma	0.00147426	30	AKT1;APC;CCND1;CDC6;CDH1;DNMT1;EGFR;ERBB2;HLTF;HMGB2;HRAS;HSPA4;HSPA8;MCM5;MYC;NME1;PCNA;PIK3CA;PIK3CB;PTEN;RTN4;SERPINH1;SP1;SSRP1;STAT3;THBS1;TP53;TSHZ1;VIM;ZEB1
Cataract	0.0458452	46	ALMS1;ATM;ATP2B1;ATR;BCOR;BLM;BUB1;CASK;CPT2;CREBBP;EP300;FBN1;FIG4;FLNB;FN1;GNAS;HSPA4;HSPG2;IARS2;IFT140;IFT172;JAG1;LONP1;LRP5;MYH9;NF2;NOTCH1;OCRL;OPA1;PEX1;PEX5;PHGDH;PIK3CA;PIK3R1;POLG;PRPF6;PRPF8;PTCH1;RAB3GAP2;RB1;SEC23A;SIPA1L3;SNRNP200;VCAN;XRCC5;ZNF592		Preauricular skin tag	0.00147895	9	CTBP1;EFTUD2;FGFR1;FLNB;GPC3;NSD2;SALL1;SF3B4;TXNL4A
Autosomal recessive predisposition	0.0460715	135	AARS;ABCA1;ABCA3;ACACA;ADAR;ADCY6;AGL;ALMS1;ANK3;AP3B1;ARFGEF2;ATM;ATP13A2;ATP5A1;ATR;BLM;BMS1;BRCA2;C2CD3;CAD;CCDC88A;CCT5;CENPE;CENPF;CPS1;CPT2;CUL7;DCHS1;DHTKD1;DIAPH1;DMXL2;DSP;DST;EFTUD2;ERBB2;FANCD2;FANCI;FASTKD2;FIG4;FLNB;GLDC;GRIP1;HADHA;HERC2;HK1;HSD17B4;HSPD1;HSPG2;IARS2;IFT140;IFT172;IGF1R;IGSF3;INPPL1;INSR;JUP;KANK2;KARS;KAT6B;KIF14;KIF1A;KIF1C;LAMB2;LARS;LONP1;LRBA;LRP2;LRP4;LRP5;LRP…		Precursor T-cell lymphoblastic lymphoma	0.00147895	9	ABL1;CEP85L;FGFR1;JAK2;MSH2;PTPN11;SEC31A;TP53;ZMYM2
Developmental delay (disorder)	0.0466422	24	AHDC1;APC;ARID2;CENPE;CHD8;CUL4B;DICER1;HERC2;HSPA4;IGF1R;LEMD3;LRP5;MACF1;NF1;PHGDH;POGZ;PTCH1;RAB3GAP2;RAI1;SALL4;UBE3A;UBE3B;USP9X;WDTC1		Sacral dimples	0.00147895	9	BAZ1B;CLIP2;DCHS1;ELN;GTF2I;HNRNPK;MED12;NSD2;RFC2
Neurogenic Muscular Atrophy	0.0466422	21	AARS;ATM;DCTN1;DHTKD1;FIG4;FLNA;FUS;GNAS;HSPG2;INSR;KIF1A;NDUFS1;OGDH;PFKM;PLEC;POLG;SLC12A6;SMCHD1;UNC13A;VCP;VPS13A		Skin tag on the posterior cheek	0.00147895	9	CTBP1;EFTUD2;FGFR1;FLNB;GPC3;NSD2;SALL1;SF3B4;TXNL4A
Neurogenic muscle atrophy, especially in the lower limbs	0.0466422	21	AARS;ATM;DCTN1;DHTKD1;FIG4;FLNA;FUS;GNAS;HSPG2;INSR;KIF1A;NDUFS1;OGDH;PFKM;PLEC;POLG;SLC12A6;SMCHD1;UNC13A;VCP;VPS13A		Neurofibromatosis 1	0.00148037	39	AR;ATM;AURKA;BIRC5;BRAF;BRCA1;BRCA2;CCND1;CDC42;CREB1;EGF;EGFR;EPHB2;ERBB2;ESR1;FN1;HRAS;JAK2;LSM2;MAPK1;MLH1;MSH2;MSH6;MTOR;NF1;NF2;NME1;PAK1;PIK3CA;PIK3CB;PTCH1;PTEN;PTPN11;RASA1;STAT3;TP53;TPT1;VCP;VHL
Skeletal muscle atrophy	0.0466422	21	AARS;ATM;DCTN1;DHTKD1;FIG4;FLNA;FUS;GNAS;HSPG2;INSR;KIF1A;NDUFS1;OGDH;PFKM;PLEC;POLG;SLC12A6;SMCHD1;UNC13A;VCP;VPS13A		Leukoencephalopathy, Progressive Multifocal	0.00148979	23	ABL1;ANXA2;BCR;CCND1;DAXX;EGF;EIF4E;GCN1;HDAC1;HDAC9;HIF1A;KAT5;MTOR;NCOR1;PCNA;PPARG;RAD51;RARA;SENP1;STAT1;TERF1;TP53;XPR1
Alagille Syndrome	0.0467079	5	JAG1;MPDZ;NOTCH1;NOTCH2;NOTCH3		Lymphatic Metastasis	0.00151494	32	APEX1;BCAR1;BIRC5;BRAF;BRCA1;CCND1;CD44;CDH1;CFTR;DCLK1;EGF;EGFR;ERBB2;ESR1;EZR;FN1;GNL3;HIF1A;MAP3K1;MDM2;MLH1;MSH2;NME1;PARP1;PLXNB1;PROM1;SMAD4;STAT3;TCP1;TP53;UBE2I;VDR
Colon diverticulum anatomic structure	0.0467079	5	BAZ1B;CLIP2;GTF2I;MSH2;PIK3CA		Prostate Cancer, Hereditary, 7	0.00154227	11	AKT1;AR;CAV1;EGF;ESR1;NPEPPS;PTEN;RUNX2;SENP1;SOS1;TP53
Diverticular disease of colon	0.0467079	5	BAZ1B;CLIP2;GTF2I;MSH2;PIK3CA		Trigeminal Neuralgia	0.00154227	11	BRCA1;CTNNB1;EGFR;ERBB2;ESR1;JAG1;MAPK1;MAPK8;PARP1;STAT3;TP53BP1
Dysgraphia	0.0467079	5	BAZ1B;CLIP2;GTF2I;VCP;VPS13A		Peripheral Neuropathy	0.00156466	53	AARS;ABCA1;ACTG1;AR;ATP5E;ATP7A;AURKA;CUL4B;DSP;DST;EGFR;EPHB2;FIG4;FLNC;GARS;GPX1;GSN;GSTP1;HADHA;HDAC6;HK1;IARS2;IGF1R;IMMT;INSR;JUN;KARS;KIF1A;KIF1B;KIF5A;KMT2D;LYST;MAP4;MAPK1;MFN2;MKI67;MYO5A;NF2;NGF;OPA1;PEX5;PNPLA6;POLG;PTPN13;SACS;SBF1;SETX;SLC12A6;SMAD3;SPAST;TUBB1;VPS13A;WNK1
Thickened helices	0.0467079	5	KAT6B;PTPN11;RB1;SOS1;SOS2		Congenital hypoplasia of lung	0.00157091	27	ACLY;AKT1;ATP5A1;CD44;EGF;EGFR;ERBB2;ESR1;ETFA;FLNA;GRIP1;HSPG2;KAT6B;LCK;LTBP4;NR3C1;PEX1;PHGDH;PKD1;RAC1;RAD51;ROR2;SETDB1;SHH;SIRT1;TP53;TTF1
HER2 gene amplification	0.0467079	10	ABCA1;BRCA1;CTNNB1;EIF3A;ERBB2;FASN;IGF1R;INTS2;PIK3CA;TOP2A		Pilocytic Astrocytoma	0.00157091	27	AKAP12;AKT1;BRAF;EGFR;EPHB2;ERBB2;FGFR1;FN1;HIF1A;KAT2B;MAPK1;MIB1;MKI67;MPRIP;MTOR;NCAM1;NF1;NOTCH2;PARP1;PHF20;PIK3CA;PIK3CB;PTEN;PTPN11;TP53;TXN;ZEB1
Low Birth Weights	0.0467079	12	CUL7;FANCD2;FBN1;HADHA;INSR;NSD2;ORC1;PIK3R1;PNPLA6;SIN3A;TTC37;ZNF592		precancerous lesions	0.00157091	27	ATM;BRAF;BRCA1;CCND1;CD44;CDH1;CDKN1A;CTNNB1;EGFR;ESR1;GJA1;GPC3;GSTP1;HSPA4;MLH1;ODC1;PARP1;POLB;POLR2G;PTEN;SMAD4;SND1;TERF2;TP53;VDR;VIM;XRCC6
Salivary Gland Neoplasms	0.0467079	12	ASPM;BRCA1;ERBB2;ESPL1;FAT1;JAG1;MFN2;PYGB;SON;STAT3;TOP2A;VCAN		Curly hair (finding)	0.00161543	8	BRAF;COL4A3BP;GJA1;HRAS;JUP;SOS1;SOS2;TTC37
Dental abnormalities	0.0467079	11	ALMS1;ARID1A;BCOR;CTCF;FBN1;FLNA;KAT6A;KMT2D;LONP1;RAI1;SMARCA4		INCLUSION BODY MYOPATHY WITH EARLY-ONSET PAGET DISEASE AND FRONTOTEMPORAL DEMENTIA	0.00161543	8	EIF4G2;GEMIN4;HNRNPA1;HNRNPA2B1;NF1;PSMD2;VCP;WDTC1
Precocious Puberty	0.0467079	11	ACACA;APC2;BMS1;GLI3;GNAS;INSR;NSD2;PCNT;POLG;SETD2;TSC2		Inverted Papilloma	0.00161543	8	EGFR;FGFR1;MIB1;MKI67;MLH1;MSH2;MSH6;TP53
Craniofacial hyperostosis	0.0467079	4	FLNA;GNAS;LRP4;LRP5		Micropapillary carcinoma	0.00161543	8	BRAF;CCND1;CDK12;ERBB2;ETFA;FGFR1;MYC;TP53
Decreased calcification of skull	0.0467079	4	FIG4;HDAC6;NOTCH2;SEC23A		Pre B-cell acute lymphoblastic leukemia	0.00161543	8	ABL1;BCR;CCND1;EWSR1;KAT2B;MTOR;NR3C1;PBX1
Defect of skull ossification	0.0467079	4	FIG4;HDAC6;NOTCH2;SEC23A		Salivary gland carcinoma	0.00161543	8	ACTN4;BRAF;BRCA1;CDH1;EGFR;MDM2;PRKDC;SPHK1
Desmoplastic Small Round Cell Tumor	0.0467079	4	BCOR;CIC;EWSR1;IGF1R		de novo myelodysplastic syndromes	0.00161543	8	ASXL1;KMT2A;PAFAH1B1;SF3B1;SLU7;TP53;U2AF1;YWHAE
Enlargement of craniofacial bones	0.0467079	4	FLNA;GNAS;LRP4;LRP5		Afro-textured hair	0.00161543	7	ATP7A;DSP;EFNB1;HRAS;JUP;KANK2;TTC37
Granulosa cell tumor of the ovary	0.0467079	4	CTNNB1;ERBB2;MTOR;VCP		Enteropathy-Associated T-Cell Lymphoma	0.00161543	7	ABL1;MYC;MYO9B;NCAM1;NOS2;NOTCH1;TP53
Hair hypopigmentation	0.0467079	4	ATM;ATP7A;LYST;MYO5A		Juvenile polyp	0.00161543	7	APC;CDKN1A;DICER1;ODC1;PTEN;SMAD4;TP53
Hypertrophy of craniofacial bones	0.0467079	4	FLNA;GNAS;LRP4;LRP5		Kinky hair texture	0.00161543	7	ATP7A;DSP;EFNB1;HRAS;JUP;KANK2;TTC37
Hypoplastic ischia	0.0467079	4	CUL7;INPPL1;KAT6B;OBSL1		Nappy hair texture	0.00161543	7	ATP7A;DSP;EFNB1;HRAS;JUP;KANK2;TTC37
Lipomatosis	0.0467079	4	MTOR;PIK3CA;PIK3CB;PNPLA6		Nonseminomatous germ cell tumor	0.00161543	7	CD44;EGFR;ESR1;FGFR1;MIB1;MKI67;TP53
Lower limb spasticity	0.0467079	4	HSPD1;KIF1A;WASHC5;ZFYVE26		Refractory anemia with excess blasts I	0.00161543	7	ASXL1;AURKB;PAFAH1B1;RARS;SF3B1;SRSF2;YWHAE
Ph-Like Acute Lymphoblastic Leukemia	0.0467079	4	ABL1;ATF7IP;BCR;JAK1		Sotos' syndrome	0.00161543	7	APC2;EPHB2;MAPK1;NSD1;NSD2;PREP;SETD2
Protrusion of tongue	0.0467079	4	ATRX;PEX1;UBE3A;VPS13A		Triple-Negative Breast Carcinoma	0.00161543	7	AR;DNMT1;EGFR;EPHB2;ERBB2;MAPK1;TP53
Psychotic episodes	0.0467079	4	ATP13A2;HSPA4;HSPA8;PREP		Wooly hair	0.00161543	7	ATP7A;DSP;EFNB1;HRAS;JUP;KANK2;TTC37
Short first metacarpals	0.0467079	4	NIPBL;PCNT;RAD21;SMC3		contralateral breast cancer	0.00161543	7	ATM;BRCA1;BRCA2;ERBB2;ESR1;FANCC;PALB2
Skin tag	0.0467079	4	MED12;PIK3CA;PTCH1;TSC2		Early-Stage Breast Carcinoma	0.0016295	20	AKT1;ATM;BRCA1;BRCA2;CCND1;CD44;CDK2;EGFR;ERBB2;ESR1;FASN;GSTP1;JAG1;MYC;PIK3CA;RPS6KB1;TBC1D9;TOP2A;TP53;WWP2
Stricture of anus	0.0467079	4	GRIP1;KMT2D;MED12;SALL1		Upward slant of palpebral fissure	0.00163121	22	AHDC1;AP3B1;ARVCF;ATRX;BUB1B;C2CD3;COL4A3BP;EFTUD2;FIG4;FLII;HDAC4;HSD17B4;JAG1;KDM5C;MEGF8;PCNT;PEX1;PEX5;RAI1;ROR2;SEC24C;SIN3A
Thick craniofacial bones	0.0467079	4	FLNA;GNAS;LRP4;LRP5		breast adenocarcinoma	0.00164216	29	AKT1;AR;BIRC5;BRCA1;CAV1;CDH1;CDKN1A;CRK;EGF;ERBB2;ESR1;GJA1;GPX1;HIF1A;HRAS;HSP90AA1;MAPK1;MAPK14;MCL1;MDM2;NOTCH1;PCNA;PKD1;RUNX2;SMAD4;STAT3;TBC1D9;TP53;VDR
Impaired cognition	0.0470605	65	ABCA1;AMPH;ANK3;ANKRD11;ATP13A2;ATR;BRCA1;CENPE;CLIP2;CREBBP;CRMP1;CTNND2;EFTUD2;EP300;EPHB2;FBN1;FGD1;FLNA;FYN;GNAS;GTF2I;HDAC3;HDAC6;HTT;IDE;INSR;JARID2;KIF1A;LRP1;LRP2;MAP2;MAPK8IP2;MGEA5;MTOR;MTR;NF1;NOS2;NOTCH3;OCRL;PCNT;PEX1;PEX5;PIK3CA;PIK3CB;POLG;PRKDC;PTPN11;RFC1;SEC23B;SMCHD1;SORL1;SPAST;SPG11;SPTBN1;SPTBN2;SRRM2;STAT3;SYNJ1;THOC2;TTC37;UBA1;UTRN;VCP;VPS13C;ZNF407		Severe Combined Immunodeficiency	0.00167273	38	ABL1;ACTN4;ANXA2;APC;AR;CCND1;CDK2;CDK4;CHD7;DCLRE1A;EPHA3;ERBB2;HIF1A;HLA-C;JAK2;LCK;LRP5;MTA2;MTHFD1;MTHFD1L;MTOR;NCAM1;NME1;NOTCH1;PARP1;PCNA;PIK3CA;PIK3CB;PIK3R1;PNP;PPARG;PRKDC;PROM1;ROBO1;RPS19;STAT1;STAT3;TP53
Cervical Intraepithelial Neoplasia	0.0470605	26	ABCA1;APC;ARID1A;ASAP1;ATM;BUB1;DNMT1;EIF4G2;ERBB2;FN1;GEMIN4;KDM4B;LAMB2;LRBA;MIB1;MKI67;MTR;NES;PIK3CA;PSMD2;PTCH1;ROBO1;STAT3;TP53BP1;VCP;WDHD1		Cardiomyopathy, Familial Idiopathic	0.00167728	58	ANXA2;APC;AR;BCL9;BRCA1;CALM1;CALM2;CALM3;CALR;CCND1;CDH1;CPT2;DNMT1;DROSHA;DSP;EGFR;ELN;EOMES;EPHB2;ERBB2;ERBIN;ESR1;FAT1;FHOD3;FN1;GJA1;GSTP1;HIF1A;HLA-C;HSP90AA1;HSPA4;KDM2A;LTBP4;MAPK1;MAPK8;MDH1;MDM2;MKI67;MYC;NCAM1;OBSCN;PHB;PIK3CA;PIK3CB;PKP2;PLEKHM2;PRDM16;PRKD1;PROM1;PRPF6;PTEN;PTPN11;STAT3;TP53;TSHZ1;VCL;VIM;WDTC1
muscle degeneration	0.0470605	26	AARS;ATM;CCT3;CRMP1;DCTN1;DHTKD1;FIG4;FLNA;FUS;GNAS;HSPG2;INSR;KIF1A;NDUFS1;NOTCH3;OGDH;OPA1;PFKM;PLEC;POLG;SLC12A6;SMCHD1;UNC13A;UTRN;VCP;VPS13A		Coarse hair	0.0016913	12	ATP7A;BRAF;COL4A3BP;FLNA;INSR;KAT6B;NOTCH3;PTPN11;SEC23A;SMARCAL1;SOS1;SOS2
Neoplastic Syndromes, Hereditary	0.0470605	8	APC;BRCA1;BRCA2;DICER1;MSH2;NF1;PIK3CA;PIK3CB		Rough hair texture	0.0016913	12	ATP7A;BRAF;COL4A3BP;FLNA;INSR;KAT6B;NOTCH3;PTPN11;SEC23A;SMARCAL1;SOS1;SOS2
Thrombocytosis	0.0470605	8	ABL1;BCR;DAAM1;KANK1;NF1;NUP214;RARS;SF3B1		Single transverse palmar crease	0.0016913	12	ANKRD11;ATR;CREBBP;EP300;FGD1;FIG4;MED12;NIPBL;PEX1;PEX5;RBM10;SIN3A
Wide nose	0.0470605	8	GRIP1;KAT6B;KMT2A;NOTCH2;SEC23A;SIN3A;STAT3;TTC37		Bone Diseases	0.00169665	31	CDKN1A;CFTR;EGFR;ERBB2;ESR1;FYN;GNAS;GSK3B;HIF1A;HSPE1;IGF1R;JAG1;LEMD3;LRP1;LRP2;LRP4;LRP5;LRP6;MAPK8;PPARG;PRDM16;RELA;ROR2;RPSA;RPTOR;RUNX2;SDC1;SMAD4;VCP;VDR;WNK1
Gastrointestinal Carcinoid Tumor	0.0475183	25	APAF1;APC;ATF7IP;BRCA1;BRCA2;CASP8AP2;CDH2;CTCF;CTNNB1;ERBB2;EWSR1;MIB1;MKI67;MSH2;MSH6;MTOR;NOTCH1;PIK3CA;PIK3CB;POLD1;PTPN11;RB1;STAT1;VCP;ZNF687		Lupus Vulgaris	0.00170066	43	ANXA2;APC;AR;BCR;CALR;CBL;CD44;CDKN1A;CREBBP;DHX9;DNER;DNMT1;EGFR;EIF2AK2;EPHB2;ERBB2;ESR1;FLII;HDAC9;HLA-C;HSP90AA1;MAPK1;MTOR;NCL;PARP1;PBX1;PCNA;PHGDH;PHRF1;RPS19;SIRT1;SNRNP70;SNRPA;SSB;STAT1;STAT3;TP53BP1;TYRO3;VDR;WDTC1;XRCC5;XRCC6;ZNF423
hearing impairment	0.0487686	35	ACTG1;ARID1A;BCOR;CHD7;COL4A3BP;CREBBP;DNMT1;EP300;FANCD2;FIG4;FLNA;GNAS;KARS;KAT6B;KMT2D;LRP4;MED12;MYH9;NOTCH2;NSD2;OPA1;ORC1;PIK3CA;PTPN11;RAI1;ROR2;SALL1;SALL4;SGO2;SH3PXD2B;SIN3A;SMARCA4;SOS1;SRP72;STAT1		Carcinoma of larynx	0.00171864	33	AURKA;BIRC5;BRCA1;CAPN1;CCND1;CD44;CDKN1A;CTTN;EGFR;EPHA7;GSTP1;HIF1A;HSPA4;IGF1R;INSR;KMT2C;LONP1;MCL1;MDM2;MLH1;MSH2;NCL;PIK3CA;PIK3CB;PLK1;PLK2;PRKD1;PROM1;PTPN11;STAT3;TOP2B;TOPBP1;TP53
Advanced bone age	0.0494716	7	ALMS1;APC2;FLNA;GLI3;INSR;PTCH1;SETD2		gliosarcoma	0.00171864	16	AKT1;BRAF;CDK4;EGF;EGFR;ESR1;FGFR1;FREM2;GJA1;MDM2;PPARG;PROM1;PTEN;RB1;TP53;URI1
Choanal Atresia	0.0494716	7	CHD7;EFTUD2;FGFR1;MED12;NIPBL;POLR1A;SMCHD1		Pituitary Diseases	0.00176854	78	AKT1;AR;BRAF;BRCA2;CALM1;CALM2;CALM3;CCNB1;CCND1;CD44;CDH1;CDK2;CDK4;CENPE;CHD7;CTBP1;CTNNB1;DICER1;DKC1;EGF;EGFR;ENC1;EPHA3;EPHB2;ERBB2;ESR1;FGFR1;FMR1;FN1;GLI2;GNAS;GSTP1;HDAC2;HMGA1;HSP90AA1;HTR2C;IGF1R;JAG1;LRPPRC;MALAT1;MAPK1;MED1;MTOR;NBEA;NCAM1;NCOA1;NF1;NGF;NR3C1;NSF;NUP214;OTX2;PBX1;PCNA;PIK3CA;PIK3CB;PNPLA6;POGZ;PPARG;PRKAR2A;PTEN;PTTG1;RPS27A;SALL1;SHH;SIRT1;SKP2;SMARCA4;SOD1;SRC;STAT3…
Thrombocythemia, Essential	0.0494716	17	ABL1;ASXL1;BCR;CTNNB1;DAAM1;FLII;HBS1L;HDAC6;HSPA4;IRS2;JAK1;RARS;SETD2;STAT1;STAT3;STAT5B;WDTC1		Chronic ulcerative colitis	0.00177677	19	ABCC4;ANXA2;APC;CCND1;CNR1;CTNNB1;GSTP1;HERC2;HLA-A;HLA-C;KIAA1109;MLH1;NOS2;NR3C1;PIK3CA;PIK3CB;PPARG;TP53;VDR
Hallervorden-Spatz Syndrome	0.0494716	6	ATP13A2;FYN;LRP2;SMARCAL1;TECPR2;VPS13A		Hamartoma	0.00177677	19	BRAF;CCND1;CDKN1A;DICER1;EGFR;ELN;GLI3;GSTP1;HMGA1;MDM2;MTOR;ODC1;PIK3CA;PIK3CB;PTEN;SHH;SMAD4;TP53;TSC2
Increased gastric cancer	0.0494716	6	APC;CTNNB1;EP300;MSH2;MSH6;PIK3CA		ear infection chronic	0.00177879	15	ALMS1;ARVCF;BAZ1B;CLIP2;ELN;FLII;FMR1;GTF2I;PIK3R1;RAI1;RFC2;ROR2;RUNX2;SEC24C;STAT3
Open Bite	0.0494716	6	BAZ1B;CLIP2;CUL4B;GTF2I;NOTCH2;ROR2		Invasive Lobular Breast Carcinoma	0.00177879	13	AR;BRCA1;CCND1;CDH1;ERBB2;ESR1;FGFR1;FUS;NOS2;PIK3CA;PIK3CB;PTEN;TP53
Plagiocephaly, Nonsynostotic	0.0494716	6	DYNC1H1;FGFR1;HERC2;KAT6A;MED12;PPP2R1A		Range of joint movement increased	0.00177879	13	CBL;CUL7;FBN1;FLNA;KMT2D;LRP5;MED12;NOTCH3;OCRL;ORC4;PPP2R1A;PTEN;STAT3
stage, neuroblastoma	0.0494716	6	ATM;ATRX;DDX1;FYN;PTCH1;STAT1		Adenoma of large intestine	0.00179828	45	APC;APEX1;ATM;AURKA;BRAF;CCND1;CD44;CDH1;CDH2;CSE1L;CTNNB1;EGFR;EPHB2;ESR1;FASN;FEN1;GSTP1;HIF1A;HLA-A;HRAS;INSR;IRS1;IRS2;LIG3;LLGL1;MLH1;MSH2;MSH6;MTOR;MTR;MYC;ODC1;OSBPL1A;PARP1;PCNA;POLB;POLD1;POLE;PPARG;SHH;SLC9A3R1;STAT3;TP53;VDR;VIM
					Hyperglycemia	0.00180313	76	ABCA1;AKT1;CBL;CCND1;CDK2;CDK4;CDKN1A;CFTR;CLIP2;COPA;CREB1;CRK;CRMP1;DGKD;DNMT1;DYNC1H1;EHMT1;EPHB2;ESR1;FANCC;FASN;FBN1;FN1;GLDC;GPX1;GRK2;HIF1A;HMGA1;IDE;INSR;IRS1;IRS2;JAK2;JUN;KAT2B;KDM1A;LRPPRC;MALAT1;MAPK1;MAPK14;MAPK8;MTOR;MYLK;NCK1;NES;NGF;NOS2;PARP1;PCNA;PIK3CA;PIK3CB;PIK3R1;PLXNA1;PPARG;PRDX4;PTCH1;PTEN;PTPRU;RELA;RPLP0;RUNX2;SETD2;SIRT1;SOD1;SP1;SPHK1;THBS1;THRAP3;TXN;UNC13A;UNC13B;UT…
					Hyperreflexia	0.00181888	48	ATP13A2;ATRX;BAZ1B;CASK;CCDC88A;CLIP2;CLP1;CREBBP;DNMT1;ELN;EP300;FTL;FUS;GJA1;GLDC;GTF2I;HRAS;HSPD1;HTT;KDM5C;KIF1A;KIF1C;KIF5A;NDUFA1;NDUFB3;NDUFB9;NDUFS1;NDUFS4;OPA1;PCLO;PEX1;PEX5;PLCB1;PNPLA6;POLR3A;POLR3B;RARS;RFC2;SACS;SETX;SOD1;SPAST;SPTAN1;SPTBN2;TBK1;UBE3A;WASHC5;ZNF592
					Lupus Erythematosus	0.00181888	48	ANXA2;APC;AR;BCR;CALR;CBL;CD44;CDKN1A;CREBBP;DHX9;DNER;DNMT1;EGFR;EIF2AK2;EPHB2;ERBB2;ESR1;FLII;GSTP1;HDAC9;HLA-A;HLA-C;HSP90AA1;MAPK1;MTOR;NCL;NOS2;NR3C1;PARP1;PBX1;PCNA;PHGDH;PHRF1;RPS19;SIRT1;SNRNP70;SNRPA;SSB;SSRP1;STAT1;STAT3;TP53BP1;TYRO3;VDR;WDTC1;XRCC5;XRCC6;ZNF423
					Hypodontia	0.00187699	24	BAZ1B;CLIP2;COL17A1;CTBP1;DKC1;DSP;EGF;EGFR;ELN;FGD1;FGFR1;FLNB;GLI3;GTF2I;KMT2D;LRP6;NOP10;NSD2;PIK3R1;POLR3A;POLR3B;RBM28;RFC2;TRIM37
					Peyronie Disease	0.00189282	10	CCND1;HDAC2;HDAC9;HIF1A;HLA-A;HLA-C;PARP1;SETD2;SMAD2;SMAD3
					stage, neuroblastoma	0.00189282	10	ATF4;ATM;ATRX;CD44;DDX1;FYN;NCAM1;NME1;PTCH1;STAT1
					Infection	0.00189973	78	ABL1;ADAR;AKT1;AP3D1;APEX1;ATM;BIRC5;CAV1;CD44;CDH1;CFTR;CTBP1;CTCF;CTNNA1;CTNNB1;CTTN;DAXX;EFNB2;EGFR;EIF2AK2;EIF4E;EIF4G1;ESR1;EZR;FASN;FLNA;FTL;GBF1;GSTP1;HDAC3;HDAC6;HIF1A;HLA-A;HLA-C;HNRNPA1;HRAS;HSPA4;HSPA8;HSPD1;IGF2R;ITGA6;JAK1;KPNB1;MAPK1;MAPK14;MDM2;MLH1;MTHFD1;MYC;NOS2;NR3C1;NUP153;PAFAH1B1;PAK1;PARP1;PCNA;PIK3CA;PLEC;PPARG;PPIA;PRKDC;PTBP1;PTPN11;RB1;RELA;RICTOR;RPTOR;SERPINH1;SMAD3;S…
					Precocious Puberty	0.00192244	18	ACACA;APC2;AR;BMS1;CAV1;CD44;CTBP1;ESR1;GLI3;GNAS;INSR;IRS1;NSD2;PCNT;POLG;PPARG;SETD2;TSC2
					Primary Glioblastoma	0.00192244	18	AKAP12;AKT1;ATM;CDK2;EGFR;FN1;FOCAD;GJA1;HIF1A;MARK4;NES;PIK3CA;PIK3CB;PROM1;PTEN;SP1;STAT3;TP53
					Prominent ear	0.00192244	18	ACSL3;ANKRD11;BAZ1B;BLM;CLIP2;CUL7;ELN;FGFR1;FMR1;GTF2I;KIF11;KMT2D;OBSL1;OCRL;PTPN11;RB1;RFC2;TXNL4A
					Abnormality of the skeletal system	0.00199269	20	ANKRD11;CALR;CDC6;CREBBP;EML1;FBN1;FIG4;GJA1;GLI2;GPC3;HNRNPA2B1;KIF3A;NF1;PIK3CA;PTPN11;RASA1;RNF216;RUNX2;SMAD3;STAT3
					Breast Cancer, Familial Male	0.00199269	5	BRCA1;BRCA2;ERBB2;HIF1A;PIK3CA
					Erythroid hypoplasia	0.00199269	5	RPL35A;RPS14;RPS17;RPS19;TP53
					Pure hereditary spastic paraplegia	0.00199269	5	KIF5A;KIF5B;KIF5C;PNPLA6;SPAST
					Quebec platelet disorder	0.00199269	5	CALM1;CALM2;CALM3;THBS1;VCL
					RETINOSCHISIS 1, X-LINKED, JUVENILE	0.00199269	5	ASXL1;ESR1;PAFAH1B1;SF3B1;YWHAE
					Seizures	0.00200077	163	ADAR;ADGRV1;AFF2;AKT1;AMPH;ANKRD11;AP3D1;APBB1;APEX1;ARFGEF2;ARID1A;ASPM;ATM;ATP5A1;ATP7A;ATR;ATRX;BCOR;BRAF;BRCA2;BRD1;CABIN1;CACNA1H;CAD;CASK;CBL;CC2D2A;CCDC88A;CCND1;CD44;CDK5;CENPE;CHD2;CNR1;COL4A2;CPS1;CPT2;CREB1;CREBBP;CRMP1;CTBP1;CTNNB1;CUL4B;DGKD;DIAPH1;DPM1;DYNC1H1;EGFR;ELFN1;EML1;EP300;EPHB2;ESR1;EWSR1;FASTKD2;FBN1;FGFR1;FIG4;FLNA;FMR1;FN1;GJA1;GLDC;GLI2;GLI3;GNAS;GRIA2;HDAC2;HDAC4;HIP1…
					Congenital hypoplasia of penis	0.00204249	40	AR;ATRX;BUB1B;C2CD3;CDC6;CDON;CHD7;CUL4B;FGFR1;FIG4;GLI2;GLI3;GRIP1;HERC2;IFT140;IFT172;KAT6B;KDM5C;KMT2D;MAP3K1;NIPBL;ORC1;OTX2;PNPLA6;POLR3B;PROM1;PRPF31;PRPF4;PRPF6;PRPF8;PTPN11;RAB3GAP2;RAD21;ROR2;SIN3A;SMC1A;SMC3;SNRNP200;UBA1;ZBTB16
					Exophthalmos	0.00205247	26	BRAF;CLP1;CREBBP;CTBP1;EP300;FGFR1;FIG4;FLNA;FLNB;INSR;JAG1;KAT6B;LRP2;NBAS;NIPBL;NSD2;PCLO;PHGDH;POLD1;PPARG;PTPN11;ROR2;SEC24D;SOS1;SOS2;TTC37
					Memory impairment	0.00206231	44	ABCA1;ANK3;AR;ATF4;BRCA1;CAPN1;CDK5;CNR1;CREB1;CREBBP;CRK;DNMT1;EHMT1;EIF2AK2;EIF2AK4;EIF4E;EPHB2;FMR1;HDAC1;HDAC4;KAT5;MAPK1;MAPK14;MAPK8;MGEA5;NCAM1;NEFM;NGF;NOTCH3;NUP43;PCNA;PPARG;PTEN;PTPRZ1;RBBP4;RPS6KB1;SIRT1;SOD1;SPAST;TTC3;VCP;VPS13A;VPS35;XPR1
					Beckwith-Wiedemann Syndrome	0.00206268	17	AMER1;CTCF;DNMT1;ELN;GNAS;GPC3;GTF2I;HRAS;IGF1R;IGF2R;NSD1;PCNA;PLXNA2;SMAD3;SMS;SPTBN1;TP53
					Blepharophimosis	0.00206268	17	ATR;BAZ1B;BCOR;CLIP2;CUL4B;DCHS1;ELN;GJA1;GTF2I;HSPG2;KAT6B;KMT2A;MED12;ORC1;RFC2;SMAD4;TXNL4A
					Hip Dislocation, Congenital	0.00206268	17	AP3B1;ATR;CENPE;ESR1;FBN1;FLNA;HNRNPK;HSPG2;IARS2;KAT6B;KMT2D;LONP1;NIN;PCNT;PPP2R5D;SNRPB;VDR
					Idiopathic Pulmonary Fibrosis	0.00206319	55	ABCA3;ATF4;CAV1;CCND1;CDKN1A;CREBBP;DNMT1;DSP;EGFR;FBN1;FBN2;FN1;GLI2;GLI3;GSK3B;HDAC9;HIST1H2AH;HIST1H4A;HIST1H4B;HIST1H4C;HIST1H4D;HIST1H4E;HIST1H4H;HIST1H4I;HIST1H4K;HLA-A;HLA-C;HSPA4;IGF1R;ITGB8;JAG1;KRT8;LEF1;MMRN1;NCOA2;PCNA;PIK3CA;PIK3CB;PKD1;PRC1;PRKD1;PTCH1;PTEN;PTK2;SART3;SDC1;SHH;SMAD2;SMG1;SPHK1;STAT3;STK3;TAGLN;TP53;VIM
					Diabetic Nephropathy	0.00206834	90	ABCA1;ACTN4;ADNP;AKT1;ATM;ATP5B;BCR;CAV1;CD44;CDC42;CDH2;CNR1;CREB1;CRMP1;CTBP1;CTNNB1;CUL5;EGF;EGFR;EHMT1;EP300;ESR1;FN1;GJA1;GPX1;GSK3B;HDAC2;HDAC4;HDAC5;HIF1A;HSPA4;HSPG2;IDE;INPPL1;INSR;IQGAP1;IRS2;JAG1;JAK1;JAK2;JUN;KMT2A;LAMB2;LRP5;LRP6;MAPK1;MAPK14;MAPK8;MIA3;MMRN1;MTHFD1L;MTOR;MYH9;NCK1;NEDD4L;NOS2;NOTCH3;PCNA;PHLPP1;PIK3CA;PIK3CB;PIK3R1;PKD1;PPARG;PTBP1;PTEN;RELA;ROCK1;RPS19;SCAF4;SIRT1;…
					Seminoma	0.0021184	38	APEX1;AR;AURKA;BRAF;CBX5;CD44;CDK2;DDX1;DICER1;DNMT1;EEF1A1;EGFR;EOMES;ESR1;GJA1;HDAC9;HMGA1;HRAS;IARS;KDM1A;KDM3A;MDM2;MLH1;MSH2;NOTCH1;NOTCH2;PATZ1;POLB;PROM1;PTEN;PTPN13;RAD17;RB1;RNF20;RPS27A;SART3;SMAD4;TP53
					Malignant Pleural Mesothelioma	0.00215604	46	ACACA;AKT1;BIRC5;BMS1;CCAR1;CD44;CDH2;CRK;CUL1;DDX46;DHX16;DNMT1;EFNB2;EGF;EGFR;EPHB2;FGFR1;FUS;GAS5;HIF1A;HLA-C;IRS1;JUN;MAPK1;MAPK14;MAPK8;MCL1;MDM2;MTA2;MTOR;MYC;PARK7;PIK3CA;PIK3CB;PLXNA1;PROM1;SETD2;SETDB1;SP1;SPHK1;STAT1;STAT3;THBS1;TP53;VIM;ZEB1
					Leukemia, Myeloid, Chronic, Atypical, BCR-ABL Negative	0.0021747	11	ABL1;ASXL1;BCR;CALR;CBL;JAK2;PAFAH1B1;PCM1;SF3B1;TP53BP1;YWHAE
					Tubular Aggregate Myopathy	0.0021747	11	CDK2;CHD7;CREBBP;EGFR;ESR1;MYC;NCOA1;PCNA;SRC;TBC1D9;VIM
					Highly variable clinical phenotype	0.0021747	36	ATRX;BUB1B;CBL;CHD7;DHTKD1;DYNC1H1;FTL;GJA1;GNAS;HSD17B4;KIF5A;NDUFA1;NDUFB3;NDUFB9;NDUFS1;NDUFS4;NIPBL;NOP10;NOTCH1;OPA1;PNPLA6;POLG;POLR3A;POLR3B;PPARG;RAD21;SIN3A;SMS;STAT1;SYNE1;SYNE2;TBK1;TSC2;VHL;ZFYVE26;ZNF423
					Highly variable phenotype and severity	0.0021747	36	ATRX;BUB1B;CBL;CHD7;DHTKD1;DYNC1H1;FTL;GJA1;GNAS;HSD17B4;KIF5A;NDUFA1;NDUFB3;NDUFB9;NDUFS1;NDUFS4;NIPBL;NOP10;NOTCH1;OPA1;PNPLA6;POLG;POLR3A;POLR3B;PPARG;RAD21;SIN3A;SMS;STAT1;SYNE1;SYNE2;TBK1;TSC2;VHL;ZFYVE26;ZNF423
					Highly variable phenotype, even within families	0.0021747	36	ATRX;BUB1B;CBL;CHD7;DHTKD1;DYNC1H1;FTL;GJA1;GNAS;HSD17B4;KIF5A;NDUFA1;NDUFB3;NDUFB9;NDUFS1;NDUFS4;NIPBL;NOP10;NOTCH1;OPA1;PNPLA6;POLG;POLR3A;POLR3B;PPARG;RAD21;SIN3A;SMS;STAT1;SYNE1;SYNE2;TBK1;TSC2;VHL;ZFYVE26;ZNF423
					Phenotypic variability	0.0021747	36	ATRX;BUB1B;CBL;CHD7;DHTKD1;DYNC1H1;FTL;GJA1;GNAS;HSD17B4;KIF5A;NDUFA1;NDUFB3;NDUFB9;NDUFS1;NDUFS4;NIPBL;NOP10;NOTCH1;OPA1;PNPLA6;POLG;POLR3A;POLR3B;PPARG;RAD21;SIN3A;SMS;STAT1;SYNE1;SYNE2;TBK1;TSC2;VHL;ZFYVE26;ZNF423
					Cancer of Nasopharynx	0.0021747	19	ADAMTS9;ANXA2;CCND1;CDH1;EGFR;FLNA;GJA1;HLA-A;MDC1;MDM2;PIK3CA;PIK3CB;PLK1;RELA;SMAD3;STAT3;TP53;WNK1;YBX1
					Lipoma	0.0021747	19	AKT1;AP2S1;APC;CAV1;CDK4;FGFR1;HMGA1;KNTC1;MDM2;MFN2;PIK3CA;PPARG;PTEN;RB1;SDC1;SEC23B;STAT5B;TBC1D9;TP53
					Chronic active hepatitis	0.00218271	16	ACACA;ALMS1;AR;BMS1;DOCK11;EIF2AK2;ERBB2;ESR1;HLA-A;HLA-C;MDM2;NOTCH3;NR3C1;PCNA;STAT1;TP53
					Delayed speech and language development	0.00218271	29	AFF2;CBL;CREBBP;DHTKD1;EFTUD2;EP300;FGFR1;FLII;FLNA;HERC2;HUWE1;IFT172;IGF1R;KAT6B;KDM5C;KMT2A;LEMD3;LRPPRC;MEIS2;NF1;NIPBL;PEX1;PIK3R1;PTEN;RAI1;SF3B4;SIN3A;SPTBN2;UBE3A
					Language Delay	0.00218271	29	AFF2;CBL;CREBBP;DHTKD1;EFTUD2;EP300;FGFR1;FLII;FLNA;HERC2;HUWE1;IFT172;IGF1R;KAT6B;KDM5C;KMT2A;LEMD3;LRPPRC;MEIS2;NF1;NIPBL;PEX1;PIK3R1;PTEN;RAI1;SF3B4;SIN3A;SPTBN2;UBE3A
					Speech impairment	0.00218271	29	AFF2;CBL;CREBBP;DHTKD1;EFTUD2;EP300;FGFR1;FLII;FLNA;HERC2;HUWE1;IFT172;IGF1R;KAT6B;KDM5C;KMT2A;LEMD3;LRPPRC;MEIS2;NF1;NIPBL;PEX1;PIK3R1;PTEN;RAI1;SF3B4;SIN3A;SPTBN2;UBE3A
					Lupus Erythematosus, Discoid	0.00228506	44	ANXA2;APC;AR;BCR;CALR;CBL;CD44;CDKN1A;CREBBP;DHX9;DNER;DNMT1;EGFR;EIF2AK2;EPHB2;ERBB2;ESR1;FLII;GSTP1;HDAC9;HLA-C;HSP90AA1;MAPK1;MTOR;NCL;PARP1;PBX1;PCNA;PHGDH;PHRF1;RPS19;SIRT1;SNRNP70;SNRPA;SSB;STAT1;STAT3;TP53BP1;TYRO3;VDR;WDTC1;XRCC5;XRCC6;ZNF423
					Carcinoma, Signet Ring Cell	0.00229772	9	APC;BRAF;CDH1;DOCK11;EML4;ESR1;MAPK14;PTEN;SMAD4
					Richter's syndrome	0.00229772	9	ATM;CCND1;LRP4;MLH1;MYC;NOTCH1;PLCG1;SF3B1;TP53
					MYELOPROLIFERATIVE SYNDROME, TRANSIENT	0.00229783	15	CCND1;CDK2;CREBBP;CTCF;CTNNB1;DLL1;EGFR;ESR1;MYC;NCOA1;PCNA;SRC;TBC1D9;VIM;YY1
					CARCINOMA OF VULVA	0.00232441	12	CCNB1;CCND1;CD44;EGF;EGFR;JUP;PCNA;PTEN;RB1;ROCK1;THBS1;TP53
					HTLV-I Infections	0.00232441	12	AKT1;ATF7IP;HLA-A;HLA-C;LRP1;PCNA;RPSA;TBC1D9;THBS1;TP53;TXN;VDR
					Mitral regurgitation, mild	0.00232441	12	BAZ1B;CBL;CLIP2;DCHS1;ELN;FBN1;FBN2;FLNA;GTF2I;POLG;RFC2;SMAD3
					Panhypopituitarism	0.00232441	12	CREBBP;EIF4E;FGFR1;GLI2;GLI3;KMT2B;KMT2D;OTX2;PTCH1;RBM28;SHH;WDR11
					Rhinovirus infection	0.00232441	12	ABCA1;CRK;EGFR;EIF4G1;EIF4G3;MAPK1;MAPK14;NGF;NOS2;RELA;SRSF3;WNK1
					DNA Damage	0.0023364	22	APEX1;ATM;ATR;BRCA1;BRCA2;CCND1;CDKN1A;CHEK1;GPX1;GSTP1;JAK2;MDM2;MLH1;MTR;PARP1;POLB;RAD51;RFC1;STAT3;TOPBP1;TP53;XRCC6
					Bronchogenic Carcinoma	0.00235996	14	AKT1;CDKN1A;EGFR;EIF4G2;FANCD2;GEMIN4;GPX1;GSTP1;HRAS;MDM2;PSMD2;SOD1;TP53;VCP
					Intestinal Cancer	0.00235996	14	APC;CDKN1A;DCLK1;ERBB2;GPX1;HLTF;HMGA1;MLH1;MYC;PRDX1;PTEN;SMAD4;SPHK1;TP53
					Impaired cognition	0.00235996	102	ABCA1;AKT1;AMPH;ANK3;ANKRD11;ATP13A2;ATR;BRAF;BRCA1;CENPE;CLIP2;CNR1;CREB1;CREBBP;CRMP1;CTNND2;DCLK1;EFTUD2;EGF;EP300;EPHB2;ESR1;FBN1;FGD1;FLNA;FMR1;FYN;GJA1;GNAS;GRIA2;GSK3B;GTF2I;HDAC3;HDAC6;HDAC9;HLA-C;HRAS;HTR2C;HTT;IDE;INSR;IRS1;JARID2;KIF1A;KLC1;LRP1;LRP2;MAP2;MAPK1;MAPK8;MAPK8IP2;MGEA5;MPDU1;MTOR;MTR;NCL;NF1;NGF;NOS2;NOTCH3;NPC2;NR3C1;OCRL;PARK7;PCNT;PEX1;PEX5;PIK3CA;PIK3CB;POLG;PPARG;PRKD…
					Generalized hirsutism	0.00237643	13	ARID1A;CAV1;GNAS;HSPG2;INSR;NIPBL;NOTCH2;PPARG;RAB3GAP2;RAD21;SMARCA4;SMC1A;SMC3
					Polycystic Kidney - body part	0.00237643	13	BIRC6;BUB1B;CFTR;CPT2;ETFA;PEX5;PKD1;PRKD1;PROM1;STAT3;TSC2;VHL;ZNF423
					Lens Opacities	0.00244507	48	AKT1;ALMS1;BCOR;BUB1;BUB1B;CASK;CPT2;CREBBP;DKC1;EP300;FBN1;FIG4;FLNB;FTL;GJA1;GNAS;HLA-A;HSPG2;IARS2;IFT140;IFT172;JAG1;LONP1;LRP5;MYH9;NF2;NOTCH1;OCRL;OTX2;PEX1;PEX5;PHGDH;PIK3CA;PIK3R1;POLG;PROM1;PRPF31;PRPF4;PRPF6;PRPF8;PTCH1;PTEN;RAB3GAP2;RB1;SNRNP200;VCAN;ZBTB20;ZNF592
					Tauopathies	0.00253601	29	ADNP;CDK5;CRK;GRK2;GSK3B;HDAC6;HSP90AA1;HSPA4;HSPA8;HSPH1;HTT;IRS1;MAP2;MAPK1;MAPK14;MAPK8;NGF;NPEPPS;NUP214;PARK7;PCNA;SIRT1;SMARCA1;SOD1;SP1;SRSF2;SYNJ1;TP53;UBB
					Turner Syndrome	0.00253601	29	ACACA;AKT1;AR;BRCA1;CDK4;DROSHA;EIF4E;EIF4ENIF1;ESR1;FMR1;H2AFX;HLA-A;HLA-C;INPPL1;MAP3K1;NOS2;NR3C1;RAD21;RAN;RPS2;RPS4Y1;SOD1;SOS1;SOS2;SSRP1;TP53;USP9X;VDR;XPO5
					Secondary malignant neoplasm of bone	0.00255341	52	ABL1;AKT1;AR;BRCA2;CD44;CDH1;CTTN;DDR1;DPYSL3;EGF;EGFR;EML4;EPHB2;ERBB2;ESR1;EZR;FASN;FGFR1;FN1;FUS;GJA1;GLI2;GPX1;HIF1A;IGF1R;MAPK1;MCL1;MMRN1;NOTCH1;NOTCH3;NRIP1;PBRM1;PIK3CA;PRKDC;PROM1;PTEN;PTK2;RUNX2;SETD2;SETDB1;SHH;SMAD3;SMAD4;SRC;STAT3;TOP3A;TP53;TRIAP1;VCAN;VDR;VIM;ZEB1
					Carcinoma, Large Cell	0.00258466	17	AKT1;BRCA1;BRCA2;CD44;EGFR;EML4;ERBB2;FGFR1;FN1;HMGA1;HRAS;PPARG;RAD51;RRM1;TP53;TTF1;USP7
					Knee joint valgus deformity	0.00258466	17	ATP7A;ATRX;BAZ1B;CLIP2;ELN;FLNA;GTF2I;HSPG2;IARS2;LONP1;MEGF8;NOTCH2;OCRL;ORC1;RFC2;SERPINH1;ZBTB20
					Leukopenia	0.00261473	39	ABCC4;AP3B1;ASXL1;BRCA2;CDC42;CTNNB1;DKC1;ESR1;FANCA;FANCC;FANCD2;FANCG;FANCI;FASN;GSTP1;HRAS;IMPDH2;LEF1;LYST;MCM2;MDM2;MSH6;MTHFD1;MTR;NCAM1;NOS2;NOTCH2;PARP1;RAD51;RPL35A;RRM1;SSB;STAT1;STAT3;STAT5B;TBC1D9;TP53;UBE2T;VPS13B
					Anaplastic large B-cell lymphoma	0.00271656	8	EGFR;EML4;INSR;NPM1;PIK3CA;PIK3CB;PTPN11;ROR2
					Hypoplastic myelodysplasia	0.00271656	8	ATRX;DKC1;FANCG;JAK2;RPS14;RPS19;SF3B1;SRP72
					Spina Bifida Occulta	0.00271656	8	CREBBP;CUL7;EP300;FLNB;PTCH1;PTPN11;RFC1;RUNX2
					Nodule	0.00271656	25	ADCY6;APC;AR;ATP1A1;AURKA;BRAF;CD44;CDH1;EGFR;ESR1;FANCA;GNAS;HMGXB3;JAG1;MAP3K4;NAT10;NCAM1;NOTCH1;PROM1;RB1CC1;RUNX2;SNRPF;TP53;VCAN;VIM
					Prominent eyes	0.00271656	25	BRAF;CLP1;CREBBP;CTBP1;EP300;FGFR1;FIG4;FLNA;FLNB;INSR;JAG1;KAT6B;LRP2;NBAS;NIPBL;NSD2;PCLO;PHGDH;POLD1;PTPN11;ROR2;SEC24D;SOS1;SOS2;TTC37
					Prominent globes	0.00271656	25	BRAF;CLP1;CREBBP;CTBP1;EP300;FGFR1;FIG4;FLNA;FLNB;INSR;JAG1;KAT6B;LRP2;NBAS;NIPBL;NSD2;PCLO;PHGDH;POLD1;PTPN11;ROR2;SEC24D;SOS1;SOS2;TTC37
					Protruding eyes	0.00271656	25	BRAF;CLP1;CREBBP;CTBP1;EP300;FGFR1;FIG4;FLNA;FLNB;INSR;JAG1;KAT6B;LRP2;NBAS;NIPBL;NSD2;PCLO;PHGDH;POLD1;PTPN11;ROR2;SEC24D;SOS1;SOS2;TTC37
					Multiple, subcutaneous nodules	0.00277266	16	AKT1;APC;CDK4;CTNNB1;FUS;GNAS;INSR;LEMD3;MDM2;NOTCH3;OCRL;PIK3CA;PTEN;SALL1;SEC23B;TSC2
					Paraparesis, Spastic	0.00277266	16	ATF7IP;GBA2;GJA1;HSPD1;KIF1A;KIF1C;MFN2;OPA1;POLG;SPAST;SPG11;TECPR2;THBS1;TSHZ1;WNK1;ZFYVE26
					Subcutaneous nodule	0.00277266	16	AKT1;APC;CDK4;CTNNB1;FUS;GNAS;INSR;LEMD3;MDM2;NOTCH3;OCRL;PIK3CA;PTEN;SALL1;SEC23B;TSC2
					Angiofibroma	0.00277266	10	AURKA;CDKN1A;ESR1;MDM2;MTOR;NCOA2;RPS6;TIMP2;TSC2;TSHZ1
					Cardiac Lymphoma	0.00277266	10	BCR;BRAF;CCND1;CKS1B;MDM2;MYC;NCAM1;PTEN;RB1;TP53
					Oligodontia	0.00277266	10	ANKRD11;BCOR;DSP;FGFR1;FLNA;GLI3;HNRNPK;LRP6;POLR3A;POLR3B
					Pituitary carcinoma	0.00277266	10	CCND1;CDK2;CDK4;EGFR;ERBB2;MSH6;NME1;PTEN;TIMP2;TP53
					Familial Alzheimer Disease (FAD)	0.00278414	26	ABCA1;AKT1;APBB1;BRCA2;CCND1;CREB1;DDR1;DOCK3;FANCD2;GSK3B;IDE;MED1;MTHFD1;NCAM1;NGF;NOTCH1;OGDH;PIK3CA;PIK3CB;PKD1;RNPS1;SMAD4;SOD1;SORL1;TP53;VIM
					Abnormal mental state	0.00285154	6	FMR1;GBA2;HRAS;KIAA1109;SPG11;ZFYVE26
					Adenosquamous cell lung cancer	0.00285154	6	AKT1;BRAF;EGFR;ERBB2;KIF5B;PIK3CA
					Breast Fibrocystic Change, Proliferative Type	0.00285154	6	ERBB2;ESR1;PPP2R1A;PTPRG;TIMELESS;TP53
					Common wart	0.00285154	6	AKT1;CDKN1A;HSPA4;MDM2;PCNA;TP53
					Elfin facies	0.00285154	6	BAZ1B;CLIP2;ELN;GTF2I;INSR;RFC2
					Gastric adenoma	0.00285154	6	APC;APEX1;ERBB2;GNAS;LRPPRC;TP53
					Malignant Female Reproductive System Neoplasm	0.00285154	6	BRCA1;BRCA2;ESR1;JAK1;NBR1;TP53
					Pelvic kidney	0.00285154	6	BAZ1B;CLIP2;ELN;FGFR1;GTF2I;RFC2
					Shawl scrotum	0.00285154	6	ATRX;CREBBP;EFNB1;EP300;FGD1;ORC1
					Triangular head shape	0.00285154	6	C2CD3;EFTUD2;FGFR1;GLI3;PTCH1;RB1
					Trigonocephaly	0.00285154	6	C2CD3;EFTUD2;FGFR1;GLI3;PTCH1;RB1
					Wedge shaped head	0.00285154	6	C2CD3;EFTUD2;FGFR1;GLI3;PTCH1;RB1
					Retroviridae Infections	0.00289754	20	ABL1;AURKA;CCND1;EGFR;EZR;GJA1;HLA-C;MSH3;MYC;NUP153;PARP1;PBX1;PDZD8;PTEN;SMAD4;TBC1D9;TIMP2;TNPO3;TP53;ZNF217
					Motor Neuron Disease	0.00289754	31	ALS2;AR;ATP7A;COL17A1;DCTN1;DYNC1H1;FIG4;FUS;GSTP1;HDAC6;HLA-A;KIF1B;LSM2;MFN2;MGEA5;NEFM;PARK7;PNPLA6;RAN;RPS6;SCAF11;SETX;SIRT1;SLC1A2;SOD1;SOS1;SPAST;TBK1;TP53;VCP;VIM
					Heart Diseases	0.00291801	57	ABCA1;ANK2;APEX1;AR;ARHGEF12;BRAF;BSN;CALM1;CALM2;CALM3;CHD7;CNR1;DSP;EGFR;EPHB2;EPRS;ERBB2;ESR1;GJA1;GRK2;HDAC1;HDAC3;HIF1A;HTT;JAK2;JUP;LCK;MAP1S;MAPK1;MTOR;MYC;MYLK;NF1;NOS2;NOTCH1;NOTCH3;NRIP1;PIK3CA;PIK3CB;PKP2;PPARG;PPP2CA;PRDM16;PSMA2;PTPN11;PTTG1;RUNX2;SCAP;SETD2;SF3B1;SIRT1;SREBF2;STAT3;SYNE1;VCL;XRCC6;ZNF592
					Human papilloma virus infection	0.00291801	15	ASAP1;BRAF;CAV1;CCND1;CDKN1A;EGFR;ERBB2;FGFR1;HLA-C;MDM2;MIB1;MKI67;PIK3CA;STAT3;TP53
					SVEINSSON CHORIORETINAL ATROPHY	0.00291801	15	AR;ASXL1;BRCA1;EGF;EGFR;EPHB2;ERBB2;HSP90AA1;MAPK1;MLH1;MSH2;ODC1;PAFAH1B1;SF3B1;YWHAE
					Chronic Neutrophilic Leukemia	0.00292657	7	ABL1;ASXL1;BCR;CALR;JAK1;JAK2;KMT2A
					Ductal Carcinoma In Situ with Microinvasion	0.00292657	7	DOCK3;HLA-C;MED1;PIK3CA;PKD1;PRPF31;TP53
					Macroencephaly	0.00292657	7	AKT1;HERC1;MTOR;PIK3CA;PIK3CB;PTEN;TSC2
					Micronodular cirrhosis	0.00292657	7	APC;AXIN1;CTNNB1;IGF2R;PIK3CA;POLG;TP53
					Stage 0 Breast Carcinoma	0.00292657	7	BRCA1;BRCA2;EGFR;ERBB2;MIB1;MKI67;TP53
					Tracheomalacia	0.00292657	7	DCHS1;FLNB;HRAS;LTBP4;ORC4;RAB3GAP2;SNRPB
					Triphalangeal thumb	0.00292657	7	GLI3;PARP1;RPL11;RPS19;SALL1;SF3B4;SHH
					Broad nasal tip	0.00301141	11	AGL;BCOR;CASK;ELN;FLNB;IGF1R;KAT6A;KIF11;LRP2;PTPRF;RAB3GAP2
					Chronic eosinophilic leukemia	0.00301141	11	ABL1;BCR;CCDC88C;CDK5RAP2;FGFR1;JAK2;NOS2;PCM1;PTEN;STAT3;STAT5B
					Tongue Neoplasms	0.00301141	11	BRAF;BRCA1;ERBB2;HIF1A;HRAS;NOTCH1;PARP1;PIK3C2A;PIK3CA;TP53;VHL
					Cerebrovascular accident	0.00301623	130	ABCA1;AKAP12;AKT1;AP3B1;AP3D1;APEX1;AR;ARVCF;BAZ1B;CAD;CALM1;CALM2;CALM3;CAPN1;CCDC88A;CCT2;CDK5;CELSR1;CLIP2;CNR1;COL4A2;COX5B;CTBP1;DIP2C;DMXL2;DOCK1;EGF;EIF2AK2;ELN;ESR1;F8;FARP1;FBN2;FLNA;GJA1;GOLGB1;GPX1;GRIA2;GRK2;GTF2I;HDAC1;HDAC2;HDAC4;HDAC9;HEATR5B;HIF1A;HLA-A;HLA-C;HSPA4;IGF1R;JAG1;JAK2;KALRN;KIF1B;KLC1;LAMA1;LARS;LRP1;LRP5;LRP6;LSAMP;LTA4H;MFN2;MKI67;MMRN1;MTHFD1;MTR;MYH9;NCOR2;NEDD4L;…
					Liposarcoma, Myxoid	0.00302964	14	AKT1;CDK4;EWSR1;FUS;HSP90AA1;IGF1R;LRP1;MDM2;MTOR;PTBP1;RPSA;SRRM2;TAF15;YBX1
					Neck Neoplasms	0.00302964	14	BRAF;CCND1;CDC20;DST;EGFR;ERBB2;HRAS;PCNA;PIK3CA;PLK1;RNF213;SLU7;STAT3;TP53
					Papillomavirus Infections	0.00302964	14	APEX1;BRAF;CDKN1A;EGFR;ERBB2;ESR1;GSTP1;HLA-A;HLA-C;ITGA6;MDM2;MLH1;SDC1;TP53
					Rous Sarcoma	0.00302964	14	BRCA1;CAV1;CEBPZ;CFTR;EGF;GPX1;LCK;PBX1;PIK3CA;PIK3CB;PNP;RPS27A;SRC;TNPO3
					Synophrys	0.00302964	14	CDON;COL4A3BP;CUL4B;FGFR1;FLII;KMT2A;NIPBL;NOTCH2;PACS1;RAD21;RAI1;SMC1A;SMC3;ZBTB20
					Cardiac Arrest	0.00306114	36	ADCY6;AKT1;AR;ATR;BRCA1;C5orf42;CALM1;CALM2;CALM3;CAPN1;CCND1;CDC7;CDKN1A;EGFR;ERBB2;ERBIN;GMNN;GSTP1;H2AFZ;HBS1L;HDAC4;HLA-A;LDHB;MCM2;NOS2;PAK1;PHLPP1;PKP2;RAN;RBL2;RNPS1;SOD1;SPTBN2;STAT1;TP53;WDTC1
					Skin carcinoma	0.00308519	21	AKT1;BCR;BIRC5;BRAF;CCND1;CTNNB1;EGFR;GLI2;GSTP1;HRAS;MDM2;NR3C1;PIK3CA;PIK3CB;PLEKHM2;PTCH1;SASH1;SNW1;THBS1;TP53;VDR
					Myopathy	0.00309311	66	ACACA;AGL;AKT1;AMPH;AR;ATF7IP;ATP7A;CHD7;CLP1;COL4A2;CPT2;DDX5;DNA2;EIF2AK4;EIF3A;ETFA;FBN1;FLNA;FLNB;FLNC;GSN;HLA-C;HNRNPA1;HNRNPA2B1;HRAS;HSPG2;INSR;KIF21A;KMT2D;LTBP4;MEGF10;NCAM1;NOTCH3;OBSL1;OPA1;PABPN1;PFKM;PIK3R4;PLEC;POLA1;POLG;PPARG;PRPF6;PTBP1;PTEN;RPS19;SHH;SMAD4;SMARCA4;SMCHD1;SOD1;SPTAN1;SPTB;THBS1;TNPO3;TRAPPC11;TXN;UBA1;UBB;UTRN;VCP;VDR;VPS13A;WASHC5;WDTC1;ZBTB20
					Spinal Muscular Atrophy	0.00309912	40	AKT1;AR;ATP7A;CARM1;CDK5;COPA;CREB1;CRK;DYNC1H1;EGF;EXOSC8;FUS;GARS;GEMIN4;H2AFX;HDAC2;HDAC4;HNRNPA1;HNRNPR;IGF1R;KIF1B;LSM2;MAP1B;MAPK1;MAPK14;NCL;NCOR2;PLS3;PTBP1;PTEN;RPL9;SCAF11;SLU7;SOD1;SRRM2;SRSF1;STAT5B;TP53;UBA1;VIM
					Endometrial Stromal Sarcoma	0.00309912	13	ARID1A;BCOR;CAV1;CCND1;ESR1;HDAC1;HDAC2;JAG1;MALAT1;PPP4C;TP53;VIM;YWHAE
					Leukocyte adhesion deficiency type 1	0.00309912	13	AKT1;COL17A1;EGFR;EPHB2;HDAC1;MAPK1;NOTCH1;PIK3CA;PIK3CB;SOS1;SP1;TP53;VIM
					Narrow forehead	0.00309912	13	ATRX;BRAF;CCDC88A;DCHS1;ELN;HERC2;KAT6A;MEIS2;NBAS;PPP2R5D;SERPINH1;SLC12A6;SMC1A
					Abnormality of cardiovascular system morphology	0.00309912	12	ARID1A;DAAM1;ELN;FGFR1;FLII;FLNA;HDAC4;PIK3CA;RAI1;RB1;SIN3A;SMARCA4
					Acute Myeloid Leukemia Arising from Previous Myelodysplastic Syndrome	0.00309912	12	ASXL1;CTNNA1;DNMT1;KMT2A;MSH2;NUP98;PAFAH1B1;PRDM16;SF3B1;TBC1D9;TP53;YWHAE
					Extrahepatic Cholangiocarcinoma	0.00313054	17	APC;BRAF;CDH1;CKS1B;CRK;EGF;EGFR;ERBB2;GSTP1;MAPK1;MAPK14;PIK3CA;PTEN;SKP2;SMAD4;TP53;TP53BP1
					Protruding ears	0.00313054	17	ANKRD11;BAZ1B;BLM;CLIP2;CUL7;ELN;FGFR1;FMR1;GTF2I;KIF11;KMT2D;OBSL1;OCRL;PTPN11;RB1;RFC2;TXNL4A
					Xeroderma Pigmentosum	0.00316845	26	AKT1;ATR;BRAF;BRCA1;CDK4;CHEK1;CSNK2A1;DDB1;GLI3;HRAS;MAPK8;MYC;NPM1;ODC1;PCNA;PRKDC;PTCH1;PTEN;RPA1;SHH;SIRT1;STAT3;TP53;UBE3B;USP7;WDTC1
					Carcinoid Tumor	0.00318334	39	AKT1;APC;BRAF;BRCA2;CD44;CDKN1A;CFTR;CTNNB1;EGF;EGFR;ERBB2;GNAS;HLA-A;HSP90AA1;INTS2;JUN;MAGED2;MAP2;MKI67;MLH1;MSH2;MYC;NF1;NGF;NME1;NOC2L;NOTCH1;PCNA;PIK3CA;PIK3CB;PTEN;SF3B6;SLCO5A1;SMAD4;SMS;TBC1D9;THBS1;TP53;TTF1
					Hyperthyroidism	0.00325981	22	AKT1;ANXA2;BRCA1;EPHA3;FLNB;FN1;GNAS;GPX1;HLA-A;HSPA4;MAGI3;PDE3B;PIK3CA;PPARG;PRRC2A;PTEN;RELA;RPS19;SOD1;VDR;VIM;WNK1
					Dissecting aneurysm of the thoracic aorta	0.0032757	38	AKT1;ATF7IP;ATM;ATP2B4;BRAF;CDH2;CRK;CTNNB1;DNMT1;DYNC2H1;EGFR;ELN;EML4;FBN1;FLNA;FYN;HDAC1;HDAC2;HDAC9;HSPD1;IGF2R;LONP1;MAPK1;MAPK14;MTOR;NOS2;PCNA;PKD1;PPARG;PRDM16;PRKD1;SMAD2;SMARCA4;SOD1;THBS1;TP53;TSC2;VHL
					Hypoplastic toenails	0.00344331	9	BAZ1B;CLIP2;CPT2;ELN;FGFR1;GTF2I;HRAS;INPPL1;RFC2
					Odontogenic Tumors	0.00344331	9	AMBN;APC;BRAF;CTNNB1;EWSR1;NOS2;PTCH1;SHH;VIM
					Ovarian Diseases	0.00344331	9	AR;BRCA1;BRCA2;CCND1;EGFR;ERBB2;ESR1;FMR1;NBR1
					Carcinoma, Neuroendocrine	0.00355512	18	APC;AR;BRAF;CAV1;CD44;CDKN1A;EGF;EGFR;ERBB2;FN1;GPC3;GRIA2;MAP2;NCAM1;PIK3CA;RB1;SHH;TTF1
					Laryngeal neoplasm	0.00355865	24	APEX1;BIRC5;BRCA1;CCND1;CD44;CDH1;CDH2;CDKN1A;CTNNB1;ERBB2;FANCG;GNAS;GSTP1;HLA-A;INTS2;LIG3;LZTS1;MDM2;PCNA;POLB;PROM1;RB1;STAT3;TP53
					Well Differentiated Oligodendroglioma	0.00360391	34	ACLY;APC;ARHGAP35;ATRX;AURKA;BIRC5;BRAF;CAV1;CDH1;CDK2;CDK4;CIC;CREB1;CSE1L;EGFR;HNRNPA1;LRIG1;MDM2;MIB1;MKI67;MSH6;NES;NOTCH1;NOTCH2;PARP1;PCNA;PDE3B;PTEN;RAC1;RASA1;SMARCA2;SMARCA4;THBS1;TP53
					Absent reflex	0.00365216	25	AARS;ADCY6;CDK5;COX6A1;DST;FIG4;JAG1;KARS;KIF1A;KIF1B;LAMB2;LYST;MARS;MFN2;OCRL;PEX1;PEX5;PNPLA6;POLG;RAI1;SBF1;SLC12A6;TECPR2;UBA1;VPS13A
					Absent tendon reflex	0.00365216	25	AARS;ADCY6;CDK5;COX6A1;DST;FIG4;JAG1;KARS;KIF1A;KIF1B;LAMB2;LYST;MARS;MFN2;OCRL;PEX1;PEX5;PNPLA6;POLG;RAI1;SBF1;SLC12A6;TECPR2;UBA1;VPS13A
					Reflex, Deep Tendon, Absent	0.00365216	25	AARS;ADCY6;CDK5;COX6A1;DST;FIG4;JAG1;KARS;KIF1A;KIF1B;LAMB2;LYST;MARS;MFN2;OCRL;PEX1;PEX5;PNPLA6;POLG;RAI1;SBF1;SLC12A6;TECPR2;UBA1;VPS13A
					Rheumatic Fever	0.00370728	15	ATM;BCR;CDK4;HLA-A;HLA-C;HUWE1;IGF1R;MDM2;NOTCH1;NPM1;PARP1;PTEN;SHH;TP53;WDTC1
					Premature aging syndrome	0.00370885	21	ASPM;ATM;BLM;BRCA1;BUB1B;CAV1;CDKN1A;CREBBP;DKC1;HDAC2;HSPA9;NCOR2;POLG;RAD51;SIRT1;SOD1;SRSF5;TERF2;TOP3A;TP53;VDR
					Malignant neoplasm of larynx	0.00371872	26	AURKA;BRCA1;BRCA2;CAPN1;CCND1;CD44;EGFR;EIF4E;EPHA7;ERBB2;GPX1;GSTP1;HIF1A;IGF1R;KMT2C;LONP1;MCL1;MDM2;NME1;PLK2;PRKD1;PROM1;PTPN11;STAT3;TOPBP1;TP53
					Congenital Heart Defects	0.00375467	49	ARID1A;AXIN1;BAG6;BRAF;CD44;CHD7;CREBBP;DNMT1;DSP;EGFR;ELN;FANCA;FANCC;FANCD2;GJA1;GNG5;GRIP1;HIF1A;JAG1;JARID2;LEF1;MAML3;MED12;MED13;MED13L;MEGF8;MTHFD1;MTHFD2;MTR;MYLK;NF1;NIPBL;NOTCH1;OPA1;PEX5;PKD1;PRRC2A;PTEN;PTPN11;RAI1;RFC1;SALL4;SH3PXD2B;SMAD2;SMARCA1;SOD1;SOS1;TBC1D9;ZBTB16
					Familial lichen amyloidosis	0.00376155	27	AR;AURKA;CCND1;CDH1;DDR1;DNMT1;EGF;EGFR;ERBB2;GNAS;GSTP1;IGF1R;MAPK8;MIB1;MKI67;NEDD4L;NOS2;NPEPPS;ODC1;PHB;PSMB5;PTEN;SMAD4;STAT3;TP53;VCP;VDR
					Osteoporosis	0.0038538	75	ACTG1;ANXA2;AR;ATP7A;CALM1;CCND1;CCT2;CD44;CHD7;CNR1;CTR9;DICER1;DKC1;ELN;ERBB2;ESR1;FGFR1;FLNB;FYN;GNAS;GPX1;GSN;HIF1A;HSD17B4;HSPG2;IGF1R;IRS1;IRS2;JAG1;KDM4B;KIFAP3;LRP1;LRP4;LRP5;LRP6;MAP3K1;MAPK1;MAPK14;MYC;NCOA3;NOP10;NOTCH2;NR3C1;NRIP1;NSD1;PARK7;PBX1;PCNA;PLEKHG1;PLS3;PLXNA2;PNP;POGK;POLD1;PPARG;PSMA2;PTPN11;PTPRF;ROR2;RPL29;RUNX2;SIRT1;SLC9A3R1;SMARCA1;SMS;SPTBN1;STAT1;THSD7A;TIMP2;TLN1;…
					Marinesco-Sjogren syndrome	0.00390333	19	ABCA1;APC;BRAF;CTNNB1;CTNND2;EGFR;FASN;IFT140;MLH1;MSH2;MSH6;NAV3;PARP1;PIK3CA;POLE;PROM1;PTEN;SLCO5A1;TP53
					Adult onset	0.00390333	22	AKT1;AR;DCTN1;DNMT1;EEF2;FLNC;FMR1;GNAS;GSN;MN1;NF2;NOTCH3;PABPN1;PARK7;PIK3CA;POLG;PTEN;SYNE1;TAF1;TBK1;WASHC5;XPR1
					Nevus	0.00390333	22	ACO1;AKT1;BRAF;CCND1;CDK4;CDKN1A;EGF;EGFR;ERBB2;HRAS;KLHL9;LEMD3;LRP2;MDM2;MYC;NOS2;PARP1;PPARG;PTCH1;PTEN;TP53;TRIM37
					Stereotyped Behavior	0.00391651	17	ADNP;ATM;BCR;COL4A3BP;CREBBP;CTBP1;EGFR;EP300;FLII;NOTCH1;NPC2;NSD2;OCRL;RAI1;SF3B1;TP53;VCP
					neurofibroma	0.00391651	17	AR;ARID1B;AURKA;CD44;EGF;EGFR;EPHB2;FN1;MAPK1;MDM2;NES;NF1;NF2;PTEN;STAT3;TOP2A;TP53
					Metastatic Renal Cell Cancer	0.00391651	14	AKT1;AURKA;EOMES;EZR;HMGA1;MTOR;NCL;NME1;PIK3CA;PIK3CB;PTEN;STAT3;TP53;VHL
					Turcot syndrome (disorder)	0.00391651	14	APC;ARID1A;BRAF;CTNNB1;HIF1A;IGF2R;MLH1;MSH2;MSH3;MSH6;NF1;PIK3CA;PTEN;TP53
					Hyperplasia of nose	0.00391651	10	ATR;BLM;CENPE;CUL4B;EP300;KAT6B;MED12;NIN;PCNT;ZNF592
					Hypertrophy of nose	0.00391651	10	ATR;BLM;CENPE;CUL4B;EP300;KAT6B;MED12;NIN;PCNT;ZNF592
					Large nose	0.00391651	10	ATR;BLM;CENPE;CUL4B;EP300;KAT6B;MED12;NIN;PCNT;ZNF592
					Radial aplasia/hypoplasia	0.00391651	10	BRCA2;FANCA;FANCC;FANCD2;FANCG;FANCI;FGFR1;RAD51;UBE2T;ZBTB16
					TUBEROUS SCLEROSIS 2 (disorder)	0.00391651	10	AKT1;BRAF;CCND1;EIF2AK2;MTOR;PKD1;PTEN;RPS6;TP53;TSC2
					Arthritis, Psoriatic	0.00395665	35	ADAMTS9;AKAP13;AKT1;BRAF;CCND1;CFTR;CNR1;EGF;ESR1;FBXL19;HLA-A;HLA-C;IRS1;JAG1;KAT5;KIF5A;MAGI1;MTOR;NGF;NOS2;PIK3CA;PIK3CB;PLCL2;PPARG;PTTG1;RELA;RFC1;RFC2;RPS6KB1;RUNX2;TIMP2;TP53;VDR;VIM;WNK1
					Cerebral Ischemia	0.00398742	39	ADGRB2;ATM;BAZ1B;CALM1;CALM2;CALM3;CAPN1;CLIP2;CREB1;ELN;GTF2I;H2AFX;HIF1A;HSPA4;JAK2;JUN;KAT5;KIAA1147;KIDINS220;MAPK14;NOS2;NOTCH3;NUP214;ODC1;PHGDH;PIK3CA;PIK3CB;PPARG;RAC1;RFC2;RPL13A;SETD2;SHH;SIRT1;SLC1A2;SOD1;SP1;TP53;VDR
					Congenital anomaly of the kidney	0.00410988	13	CFTR;CREBBP;EP300;FBN1;KMT2B;KMT2D;LRP4;NOTCH2;NSD2;RAI1;SHH;SMARCAL1;TBC1D1
					Aggressive Non-Hodgkin Lymphoma	0.00415526	11	ATM;AURKA;CD44;EIF4A2;EIF4E;EIF4G1;ESPL1;MYC;NCAM1;TP53;WDTC1
					Barrett's Adenocarcinoma	0.00415526	11	BRAF;CRK;EGFR;EPHB2;ERBB2;MAPK1;MAPK14;MIB1;MKI67;RAD51;TP53
					Increased chromosomal breakage	0.00415526	11	ATM;BLM;BRCA2;FANCA;FANCC;FANCD2;FANCG;FANCI;POLA1;RAD51;UBE2T
					Irregular hyperpigmentation	0.00415526	11	AKT1;BRCA2;FANCA;FANCC;FANCD2;FANCG;FANCI;HRAS;PTEN;RAD51;UBE2T
					Anxiety	0.00420396	69	ACACA;ANK3;APC;AR;ATF7IP;ATM;BAZ1B;BMS1;BRCA1;BRCA2;CCND1;CHD7;CLIP2;CNR1;CREB1;CTNND2;DCTN1;DLL1;ELN;EP300;ESR1;EXOSC6;F8;FGD1;FGFR1;FIG4;FLII;FMR1;FUS;FYN;GLI2;GNAS;GRIA2;GTF2I;HNRNPA1;HSPG2;HTR2C;HTT;IGF1R;MAGED1;MCL1;MLH1;MSH2;MSH6;NF2;NGF;NIPBL;NR3C1;OCRL;PARK7;PIK3CA;PLXNA2;RAD21;RAI1;RFC2;RPS4Y1;SIRT1;SLC1A2;SMC1A;SMC3;SOD1;TBK1;TP53;TSC2;UNC13A;UNC13B;VCP;VPS13A;YY1
					Hereditary hemochromatosis	0.00421257	37	ABL1;ACO1;AKT1;APC;ATAD2;BCR;CALR;CD44;CTNNB1;CUL3;DKC1;EGFR;ERBB2;FN1;GLI2;GLI3;GPC3;GSTP1;HDAC1;HIF1A;HLA-A;HLA-C;IFT172;KAT2B;MAML3;MSH3;NEO1;NF1;PIK3CA;PIK3CB;PTCH1;RAC1;RPS6KB1;SDC1;SHH;TP53;ZEB1
					Acute monocytic/monoblastic leukemia	0.00421257	8	ANXA2;CREBBP;EIF4E;KAT6A;KMT2A;NME1;NOS2;VDR
					Aplasia/Hypoplasia of the abdominal wall musculature	0.00421257	8	ATP7A;BRAF;FLNB;GPC3;KAT6B;PTPN11;SOS1;SOS2
					Carcinoma of ampulla of Vater	0.00421257	8	APC;CD44;EGFR;ERBB2;MIB1;MKI67;MSH2;TP53
					Fallopian Tube Carcinoma	0.00421257	8	ACTN4;BRCA1;BRCA2;EGFR;ERBB2;NBR1;NF2;TP53
					Long palpebral fissure	0.00421257	8	ACTG1;ANKRD11;BRAF;CLP1;HNRNPK;KMT2D;PCLO;ROR2
					Myelodysplastic-Myeloproliferative Diseases	0.00421257	8	ABL1;ASXL1;BCR;CBL;JAK2;PAFAH1B1;SF3B1;YWHAE
					Pancreatic Intraductal Papillary-Mucinous Neoplasm	0.00421257	8	EGFR;GNAS;PIK3CA;PIK3CB;PTEN;SMARCA4;VIM;ZEB1
					Pyridoxine-responsive sideroblastic anemia	0.00421257	8	BRCA2;FANCA;FANCC;FANCD2;FANCG;FANCI;RAD51;UBE2T
					T-cell adult acute lymphoblastic leukemia	0.00421257	8	ABL1;ATF7IP;KAT5;NOTCH1;NUP214;PTEN;THBS1;TXN
					Chromosome 8, trisomy	0.00422096	16	ABL1;ASXL1;BCR;CCND1;ERBB2;EWSR1;JAK2;KMT2A;MYC;NCAM1;PAFAH1B1;PBX1;RARA;SF3B1;U2AF1;YWHAE
					Chubby cheeks	0.00422096	16	AGL;ATP7A;BRAF;CCDC88A;CDK5;ELN;FBN1;GNAS;HRAS;HSPG2;KIF1A;NOTCH2;OCRL;PCLO;PCNT;PIK3CA
					Fibroadenoma	0.00422096	16	AR;DAXX;DNMT1;EIF4E;ERBB2;ESR1;GJA1;IARS;MED12;MYC;NF1;PTEN;RARA;RB1;TP53;VDR
					Full cheeks	0.00422096	16	AGL;ATP7A;BRAF;CCDC88A;CDK5;ELN;FBN1;GNAS;HRAS;HSPG2;KIF1A;NOTCH2;OCRL;PCLO;PCNT;PIK3CA
					Hyperplasia of cheeks	0.00422096	16	AGL;ATP7A;BRAF;CCDC88A;CDK5;ELN;FBN1;GNAS;HRAS;HSPG2;KIF1A;NOTCH2;OCRL;PCLO;PCNT;PIK3CA
					Hypertrophy of cheeks	0.00422096	16	AGL;ATP7A;BRAF;CCDC88A;CDK5;ELN;FBN1;GNAS;HRAS;HSPG2;KIF1A;NOTCH2;OCRL;PCLO;PCNT;PIK3CA
					Puffy cheeks	0.00422096	16	AGL;ATP7A;BRAF;CCDC88A;CDK5;ELN;FBN1;GNAS;HRAS;HSPG2;KIF1A;NOTCH2;OCRL;PCLO;PCNT;PIK3CA
					Immune System Diseases	0.00425728	29	AKT1;ASXL1;CTSC;EGFR;EIF2AK4;EPHB2;ESR1;HLA-C;HSPD1;HTT;KIF3A;LRBA;MAPK1;NUP85;PAFAH1B1;PER1;PIK3CA;PIK3CB;PNP;SDC1;SF3B1;SOD1;STAT1;STAT3;STAT5B;TIMP2;VDR;WDTC1;YWHAE
					Respiratory Failure	0.00425728	29	ABCA3;CFTR;CPT2;DCTN1;EGFR;EML4;EXOSC8;FBN1;FIG4;FLNA;FLNC;FUS;HADHA;HNRNPA1;HRAS;NDUFA1;NDUFB3;NDUFB9;NDUFS1;NDUFS4;NPC2;POLB;PTEN;RUNX2;SOD1;TBK1;TTF1;UNC13A;VCP
					Hyperkyphosis	0.00426616	28	AKT1;ALMS1;ATP7A;BAZ1B;CLIP2;CTBP1;CUL4B;ELN;GNAS;GTF2I;HERC2;HSPG2;NOTCH3;NSD2;OCRL;PIK3CA;POLD1;PTCH1;PTEN;RAB3GAP2;RFC2;ROR2;RUNX2;SEC24D;SNRPB;UBA1;WASHC5;ZBTB20
					Lymphoid leukemia	0.00427778	36	ABL1;ATF4;ATM;BCR;BUB1;CCND1;CD44;CDK2;DLL1;EIF2AK2;EPHA3;GPM6A;GRB2;HSP90AA1;JAK2;KDM2B;KMT2A;LCK;MLH1;MYC;MYO6;NOTCH1;NOTCH3;NR3C1;NUP98;ODC1;PBX1;PTPN11;RARA;RPS14;SIRT1;TBC1D9;TP53;TP53BP2;WDTC1;YY1
					Adenovirus Infections	0.00433336	21	AKT1;BIRC5;CFTR;CHEK1;CREBBP;EGF;EGFR;EIF4E;FN1;HBS1L;HIF1A;HNRNPUL1;MAGI1;MAP4;MDM2;MYO5A;MYO6;NR3C1;PCNA;TP53;VIM
					M5b Acute differentiated monocytic leukemia	0.00454894	22	CALM1;CALM2;CALM3;CDKN1A;CREBBP;EP300;EPS15;KAT6A;KMT2A;NCOA2;NF1;NME1;NPM1;PPARG;RELA;RPTOR;SNAP91;TBC1D9;TIMP2;TP53;VDR;WNK1
					Inadequate arch length for tooth size	0.0046054	15	ATR;BCOR;CREBBP;EP300;FBN1;FGFR1;GJA1;GRIP1;MED12;NOTCH3;POLD1;ROR2;SMS;TECPR2;TRIM37
					Tooth Crowding	0.0046054	15	ATR;BCOR;CREBBP;EP300;FBN1;FGFR1;GJA1;GRIP1;MED12;NOTCH3;POLD1;ROR2;SMS;TECPR2;TRIM37
					Tooth mass arch size discrepancy	0.0046054	15	ATR;BCOR;CREBBP;EP300;FBN1;FGFR1;GJA1;GRIP1;MED12;NOTCH3;POLD1;ROR2;SMS;TECPR2;TRIM37
					Tooth size discrepancy	0.0046054	15	ATR;BCOR;CREBBP;EP300;FBN1;FGFR1;GJA1;GRIP1;MED12;NOTCH3;POLD1;ROR2;SMS;TECPR2;TRIM37
					Turner Syndrome, Male	0.0046054	15	AR;ARHGEF2;BRAF;CBL;EPHB2;HRAS;KAT6B;MAPK1;NF1;PTPN11;PTPRU;SOS1;SOS2;STAT3;STAT5B
					Broad cranium shape	0.00468134	23	ATP7A;BUB1B;EFNB1;FBN1;FBN2;FGFR1;FLII;GJA1;HCFC1;LRP5;NBAS;NIPBL;PCLO;RAB3GAP2;RAD21;RAI1;SLC12A6;SMC1A;SMC3;TECPR2;UBE3A;WASHC5;ZBTB20
					Motor neuron atrophy	0.00468134	23	ALS2;APEX1;AR;ATP7A;CCDC88A;CDK5;DCTN1;EEF1A1;FIG4;FUS;GARS;HECW1;HIF1A;KIF1A;NES;PIK3CA;PIK3CB;PNPLA6;PPIA;SLC1A2;SOD1;SPG11;VCP
					Wide skull shape	0.00468134	23	ATP7A;BUB1B;EFNB1;FBN1;FBN2;FGFR1;FLII;GJA1;HCFC1;LRP5;NBAS;NIPBL;PCLO;RAB3GAP2;RAD21;RAI1;SLC12A6;SMC1A;SMC3;TECPR2;UBE3A;WASHC5;ZBTB20
					Mycobacterium Infections	0.00475356	17	ANXA2;ARHGEF2;CFTR;FN1;HSPD1;HSPE1;LTA4H;MAPK1;NCAM1;NOS2;PIK3CA;PIK3CB;PTEN;RPSA;STAT1;STAT3;VDR
					Speech Delay	0.00484445	30	AFF2;CBL;CREBBP;DHTKD1;EFTUD2;EP300;FGFR1;FLII;FLNA;HERC2;HUWE1;IFT172;IGF1R;KAT6B;KDM5C;KMT2A;LEMD3;LRPPRC;MEIS2;NF1;NIPBL;NSD2;PEX1;PIK3R1;PTEN;RAI1;SF3B4;SIN3A;SPTBN2;UBE3A
					Aneurysm	0.00488816	26	AKT1;ATM;ATP7A;ELN;FBN1;FN1;LRP1;LTBP4;MARS;MMRN1;MPRIP;NOTCH1;PKD1;PKP2;PTEN;RAC1;RELA;SMAD2;SMAD3;STAT1;TIMP2;TJP1;TP53;VHL;VIM;WNK1
					Decreased platelet count	0.00488816	26	ABL1;ACTN1;AP3B1;ATRX;BCR;BRCA2;DKC1;FANCA;FANCC;FANCD2;FANCG;FANCI;FLNA;JAK2;LRBA;LYST;MYH9;NIPBL;NOP10;OCRL;PHGDH;RAD51;RPS19;SMARCAL1;UBE2T;XPR1
					Renal fibrosis	0.00488816	35	ATM;ATP5B;CABIN1;CD44;CNR1;CRK;DDR1;EGFR;EZR;FN1;GJA1;GLI2;GLI3;HIF1A;IGF2R;MAPK1;MAPK14;MAPK8;PIK3CA;PIK3CB;PPP2CA;PTBP1;PTEN;SIRT1;SMAD2;SMAD3;SMAD4;SPHK1;SRRM2;STAT1;STAT3;THBS1;TP53;VDR;VIM
					Abnormality of the metaphyses	0.00488816	14	ATP7A;CUL7;FLNA;GJA1;HSPG2;IFT140;IFT172;INPPL1;LEMD3;NOTCH3;OBSL1;PCNT;SEC24D;VDR
					Congenital arteriovenous malformation	0.00488816	14	AKT1;FN1;MAP2;MDM2;NOTCH1;NOTCH3;PIK3CA;PIK3R4;PTEN;RASA1;SMAD4;STAT3;THBS1;VHL
					Adenoma, Villous	0.00488816	7	APC;BRAF;GNAS;MLH1;MSH2;MSH6;TP53
					Fissured tongue	0.00488816	7	AKT1;HLA-C;KDM5C;PIK3CA;PTEN;RAB3GAP2;SEC23B
					Histiocytoma, Benign Fibrous	0.00488816	7	CREB1;EWSR1;FUS;MCM2;MIB1;MKI67;TP53
					Mixed Connective Tissue Disease	0.00488816	7	COL17A1;HNRNPC;LSM2;NCAM1;PTBP1;SNRNP70;SNRPA
					Nevi and Melanomas	0.00488816	7	APAF1;BRAF;CCND1;EIF4E;PTEN;SKP2;TP53
					Papillary and follicular adenocarcinoma	0.00488816	7	AKT1;BRAF;EGF;HRAS;PIK3CA;TP53;VDR
					Uterine Carcinosarcoma	0.00488816	7	DICER1;EGFR;ERBB2;NES;PROM1;SMAD2;TP53
					Uterine Corpus Carcinosarcoma	0.00488816	7	DICER1;EGFR;ERBB2;NES;PROM1;SMAD2;TP53
					Aarskog syndrome	0.00488816	5	ARHGEF2;CDC42;FGD1;GLI3;SOS1
					Bronchomalacia	0.00488816	5	FGFR1;FLNB;HRAS;LTBP4;ORC4
					Disorder of lymph node	0.00488816	5	MDM2;MIB1;MKI67;TP53;U2AF2
					Familial ependymoma	0.00488816	5	EGFR;NF2;PIK3CA;PIK3CB;TP53
					Metaplastic breast carcinoma	0.00488816	5	BRCA1;EGFR;ERBB2;NR3C1;TP53
					Oral mucosal blistering	0.00488816	5	COL17A1;DSP;ITGA6;JUP;PLEC
					Paraparesis	0.00488816	5	ATP13A2;GJA1;HSPD1;NF1;SPAST
					Refractory anemia with ring sideroblasts associated with marked thrombocytosis	0.00488816	5	ASXL1;CDK13;JAK2;RARS;SF3B1
					SHORT syndrome	0.00488816	5	AKT1;IGF1R;PIK3CA;PIK3CB;PIK3R1
					Short 4th metacarpal	0.00488816	5	DCHS1;FLNA;GLI3;GNAS;PTCH1
					Wallerian Degeneration	0.00488816	5	CCAR2;NEFM;NF1;SIRT1;SRSF3
					high-grade childhood cerebral astrocytoma	0.00488816	5	BRAF;EGFR;H3F3A;H3F3B;TP53
					Heparin-induced thrombocytopenia	0.00492611	9	AMER1;ATM;MYC;PBRM1;PKD1;PTCH1;SETD2;TP53;VHL
					High grade serous carcinoma	0.00492611	9	BRAF;BRCA1;BRCA2;ESR1;PARP1;PPP2R1A;RSF1;TOP2A;TP53
					Mucinous Neoplasm	0.00492611	9	APC;BRAF;EGFR;GNAS;HIF1A;LONP1;PIK3CA;PTEN;SMARCA4
					Narrow palate	0.00492611	9	CPT2;CREBBP;EP300;FBN1;HERC2;HRAS;MED12;MEGF8;RUNX2
					Steroid resistant nephrotic syndrome of childhood	0.00492611	9	ACTN4;CRB2;FAT1;NUP107;NUP205;NUP93;SMARCAL1;TBC1D9;XPO5
					Thymic Carcinoma	0.00492611	9	CCND1;CDK2;EGFR;ERBB2;HRAS;HSP90AA1;IGF1R;NGF;TP53
					hearing impairment	0.00492611	54	ACTG1;AKT1;ARID1A;BCOR;BRAF;CHD7;COL4A3BP;CREBBP;DNMT1;EP300;EXOSC8;FANCA;FANCC;FANCD2;FIG4;FLNA;FMR1;GJA1;GNAS;GPC3;GSTP1;KARS;KAT6B;KMT2D;LRP4;MED12;MYH9;MYO6;NOTCH2;NSD2;OPA1;ORC1;PCLO;PIK3CA;POLA1;PPARG;PTEN;PTPN11;RAI1;ROR2;RUNX2;SALL1;SALL4;SF3B4;SGO2;SH3PXD2B;SIN3A;SMAD4;SMARCA4;SOD1;SOS1;SRP72;STAT1;ZBTB20
					Chromosome Aberrations	0.00505588	21	APEX1;AR;ATM;BRAF;BRCA1;CCND1;CDKN1A;CFTR;EFNB1;EGFR;FGFR1;GLI3;GSTP1;JAK2;KMT2A;MTR;NPM1;RAD51;RASA1;RFC1;TP53
					Adenomatous polyp of colon	0.00513165	16	APC;CCND1;CD44;GSTP1;HRAS;NME1;NOS2;NPM1;ODC1;PARP1;PTEN;RXRA;SMAD4;STAT3;TP53;VDR
					Autosomal dominant retinitis pigmentosa	0.00513165	16	CDK5;CUL3;HK1;HSP90AA1;LONP1;MAP3K1;PHF5A;PKN1;PRPF31;PRPF4;PRPF6;PRPF8;SLU7;SNRNP200;SRSF2;TIMP2
					Distal amyotrophy	0.00513165	16	ABCA1;AGL;ATP7A;CCT5;DCTN1;GARS;KIF1B;KIF1C;MFN2;PNPLA6;POLG;SACS;SOD1;VCP;ZBTB20;ZFYVE26
					Narrow face	0.00513165	16	ATP7A;ATR;BAZ1B;BCOR;BLM;CENPE;CHD7;CLIP2;ELN;FBN1;FMR1;GTF2I;MED12;PCNT;RFC2;SIN3A
					Thin face	0.00513165	16	ATP7A;ATR;BAZ1B;BCOR;BLM;CENPE;CHD7;CLIP2;ELN;FBN1;FMR1;GTF2I;MED12;PCNT;RFC2;SIN3A
					secondary acute myeloid leukemia	0.00513165	16	ABL1;ASXL1;AURKB;BCOR;CBL;JAK2;KMT2A;MAPK8;NPM1;PAFAH1B1;PER1;SF3B1;TBC1D9;TP53;U2AF1;YWHAE
					Sparse eyebrow	0.0051492	13	DSP;FIG4;HDAC4;JUP;KANK2;KMT2D;MEGF8;RPL21;RPS28;SIN3A;SNRPE;SOS1;SOS2
					Glaucoma	0.00515848	53	ABCA1;ARHGEF12;ATR;BCOR;BIRC6;BUB1;BUB1B;CAV1;CDC7;CDKN1A;CENPE;CREBBP;CRMP1;DMXL1;DNMT1;ELN;EP300;FBN1;FN1;GJA1;GSTP1;IFT140;IFT172;MMRN1;MYLK;NCAM1;NOS2;NR3C1;OCRL;OPA1;PCNT;PEX1;PEX5;PIK3R1;PRDX6;PROM1;PRPF31;PRPF4;PRPF6;PRPF8;PTCH1;RPS19;SALL1;SMAD4;SNRNP200;SRBD1;TBK1;THBS1;TP53;TXN;USP9X;UTRN;VCAN
					Choriocarcinoma	0.00521016	49	APC;BRAF;CAV1;CCNB1;CD44;CFTR;CUL1;CUL7;DNMT1;EGF;EGFR;EPHA3;ESR1;EZR;F8;FGFR1;HIF1A;HLA-A;HLA-C;HSPA4;IGF2BP1;INSR;JAG1;JAK2;KRT8;MALAT1;MCL1;MDM2;MGAT3;MSH3;NAT10;ODC1;PAK1;PIK3CA;PIK3CB;PPARG;RFC2;RXRA;SRSF1;STAT1;STAT3;SUGP1;TIMP2;TP53;TP53BP2;USP7;VDR;WDR48;WDTC1
					Hemangioma	0.00521518	22	AKT1;CCND1;CTBP1;DPM1;EPHB2;HIF1A;HMGA1;HRAS;IGF2R;JAG1;KIF1B;MAPK1;MTOR;NSD2;PCNA;PROM1;PTEN;SETD2;THBS1;TIMP2;TSC2;VHL
					Hyperinsulinism	0.00527185	56	ABCA1;ACACA;ACLY;ADGRV1;AKT1;ALMS1;ARHGEF12;BMS1;CAV1;CCND1;CDK4;CNR1;DYNC1H1;EHMT1;ERBB2;ESR1;FANCC;FAT1;FBN1;GPX1;GRK2;HERC2;HIF1A;HLA-C;HRAS;HTR2C;IARS;IDE;IFT140;IFT172;IGF1R;INSR;IRS1;IRS2;JAK2;MAPK14;MAPK8;MYLK;NPC2;NR3C1;PIK3CA;PIK3CB;PPARG;PROM1;PRPF31;PRPF4;PRPF6;PRPF8;PTEN;PTPRD;SMAD3;SNRNP200;SP1;SREBF1;STAT1;STAT3
					Meningioma, benign, no ICD-O subtype	0.00527185	39	AKT1;AP1B1;AP2B1;APC;ATM;BRCA2;CCND1;CDH1;CKS2;DNMT1;EGF;ESR1;FGFR1;GPX1;GRB2;HLA-A;IGF1R;JAK1;KMT2A;MDM2;MGEA5;MIB1;MKI67;MSH3;MTOR;MYC;NF1;NF2;NR3C1;ODC1;PCNA;PTEN;RAC1;RB1;STAT3;TIMP2;TNKS;TP53;VHL
					Anal carcinoma	0.00527185	6	APC;EGFR;MCM7;MTOR;SMAD4;TP53
					Gastrointestinal hamartomatous polyps	0.00527185	6	AKT1;PIK3CA;PTEN;SEC23B;SMAD4;TP53
					Nodular melanoma	0.00527185	6	APAF1;BRAF;CD44;HIF1A;MDM2;MYC
					Ph-Like Acute Lymphoblastic Leukemia	0.00527185	6	ABL1;ATF7IP;BCR;JAK1;JAK2;TP53
					Psychotic episodes	0.00527185	6	ATP13A2;HSPA4;HSPA8;HTR2C;PARK7;PREP
					Pure Red-Cell Aplasia	0.00527185	6	BCR;HLA-A;RPS17;RPS19;RPS24;STAT3
					Refractory anemia with excess blasts II	0.00527185	6	ASXL1;PAFAH1B1;RARS;SF3B1;SRSF2;YWHAE
					Reticulocytopenia	0.00527185	6	FANCA;FANCC;FANCD2;RPS17;RPS19;RPS24
					Skin tag	0.00527185	6	AKT1;MED12;PIK3CA;PTCH1;PTEN;TSC2
					Symmetrical dyschromatosis of extremities	0.00527185	6	ABL1;ADAR;CHAF1A;CTR9;PIK3R4;RAB3GAP2
					Abscess	0.00527185	10	APC;FN1;GJA1;HDLBP;HIF1A;HLA-C;HSPD1;NES;SETD2;STAT3
					Monoclonal Gammapathies	0.00527185	10	HIF1A;HRAS;LRPPRC;MLH1;MYC;NCAM1;RB1;SDC1;TP53;WDTC1
					Peripheral axonal neuropathy	0.00527185	10	AARS;ABCA1;CCT5;KIF1A;KIF1B;MARS;MFN2;OPA1;PNPLA6;SLC12A6
					Therapy-Related Leukemia	0.00527185	10	APC;BCR;CREBBP;EIF4E;FN1;KMT2A;MLH1;MSH2;TOP2B;TP53
					Brachycephaly	0.00528232	23	ATP7A;BUB1B;EFNB1;FBN1;FBN2;FGFR1;FLII;GJA1;HCFC1;LRP5;NBAS;NIPBL;PCLO;RAB3GAP2;RAD21;RAI1;SLC12A6;SMC1A;SMC3;TECPR2;UBE3A;WASHC5;ZBTB20
					Mitral Valve Insufficiency	0.00529797	12	BAZ1B;CBL;CLIP2;DCHS1;ELN;FBN1;FBN2;FLNA;GTF2I;POLG;RFC2;SMAD3
					Bronchioloalveolar Adenocarcinoma	0.00536212	19	AKT1;ATR;AURKB;BRAF;CAV1;CCND1;EGFR;EIF4E;EPHB2;ERBB2;FGFR1;KIF5B;MAPK1;MTOR;PIK3CA;PTEN;RAD51;RBBP6;TP53
					Generalized osteopenia	0.00537241	24	BRAF;CCND1;CD44;CHD7;DCHS1;ELN;ESR1;FBN2;FGFR1;GLI2;GNAS;HRAS;HSD17B4;IARS2;LRP5;NOTCH2;OTX2;PLS3;SEC24D;SERPINH1;SLC9A3R1;SMARCAL1;STAT1;STAT3
					Follicular neoplasm	0.00537241	11	BRAF;BUB1B;HRAS;MCL1;PCNA;PPARG;PRDX1;PRDX6;PTCH1;PTEN;TP53
					Gingivitis	0.00537241	11	ACACA;ALMS1;ATM;BMS1;CTSC;ESR1;HSPD1;LYST;NOS2;SMC3;STAT3
					stage, ovarian epithelial cancer	0.00537241	11	BRCA1;BRCA2;MDM2;MIB1;MKI67;NBR1;PIK3CA;SHH;SP1;TIMP2;TP53
					Mild Mental Retardation	0.00541441	25	AFF2;AGL;AP3B1;ARVCF;ATRX;BCOR;CTNND2;DHTKD1;EP300;FBN1;FLNA;FMR1;HDAC6;HUWE1;KIF11;LEMD3;LRP5;NF1;POLR3B;PTPN11;RAB3GAP2;RAI1;SEC24C;SMAD3;TRIO
					Leukoplakia	0.00555384	15	ATM;BRCA1;CTTN;EGFR;GSTP1;MCL1;MDM2;MLH1;MSH2;NOS2;NOTCH1;PRKDC;PTBP1;SRRM2;TP53
					Parathyroid Neoplasms	0.00555384	15	APC;ATRX;CCND1;CTNNB1;EGFR;ESR1;HDAC1;LRP5;MDM2;MKI67;MYC;RAD51;SMAD3;TP53;VDR
					Thin hypoplastic alae nasi	0.00555384	15	ANKRD11;BCR;CLP1;FLNB;GJA1;GRIP1;HDAC4;HNRNPK;MAPK1;ORC4;PCNT;PIK3R1;PLEC;SIN3A;TXNL4A
					Ewing Sarcoma/Peripheral Primitive Neuroectodermal Tumor	0.0055792	17	BRCA2;CAV1;CCND1;CDK4;CIC;DHX9;EWSR1;FLII;IGF1R;MYC;PARP1;PIK3CA;PIK3CB;PTBP1;SRRM2;STAG2;TP53
					Gynecomastia	0.0055792	17	AKT1;ALMS1;AR;BRCA2;CHD7;CUL4B;FGFR1;FMR1;INSR;MAP3K1;PIK3CA;PNPLA6;POLR3B;PTEN;RBM28;RNF216;ZBTB20
					Memory Loss	0.0055792	17	ABCA1;CREB1;DNMT1;EGFR;FASTKD2;FMR1;FUS;MTOR;NGF;NOTCH3;RBBP4;SOD1;SPAST;STAT3;VCP;VPS13A;XPR1
					Liver Cirrhosis	0.0056285	102	ABCA1;ABCC4;ADAR;AKT1;APC;APEX1;AR;AURKB;AXIN1;BCL9;BCR;CALR;CAV1;CDH1;CDKN1A;CKS1B;CKS2;CNR1;CTNNB1;DCLK1;DDR1;DDX5;DENND4A;DKC1;DNA2;DNMT1;EGF;EGFR;EIF2AK2;ELN;ERBB2;ESR1;F8;FBN1;FBN2;FN1;GLI2;GMNN;GPC3;GPX1;GSK3B;GSTP1;HIF1A;HLA-A;HLA-C;HSPG2;IGF1R;IGF2R;JAG1;JAK1;JAK2;KIF1B;KRT8;LTBP4;MCM2;MDM2;MLH1;MMRN1;MSH2;MSH6;MTR;MYC;NCAM1;NGF;NME1;NOS2;NOTCH3;NPC2;NPM1;NUP98;PAPSS1;PCNA;PPARG;PPP2CA;PR…
					Attention deficit hyperactivity disorder	0.00568925	65	ADGRL3;AKT1;ARVCF;BAZ1B;CHD7;CLIP2;CNR1;CREBBP;CTNNA2;DCLK1;DHTKD1;DOCK3;ELFN1;ELN;ERBB2;FGD1;FLII;FLNC;FMR1;FN1;GIT1;GJA1;GSK3B;GTF2I;HDAC5;HERC2;HK1;HTR2C;IPO11;KALRN;LAMB2;MAP1B;MED12;MLH1;MSH2;MSH6;NCAM1;NCAN;NF1;NF2;NGF;NIPBL;NOS2;NSD1;OCRL;PER1;PIK3CA;PIK3CB;PTEN;PTPRD;RAD21;RAI1;RFC2;SEC24C;SHH;SIN3A;SLC12A6;SMC1A;SMC3;TSC2;UBE3A;UPF3B;VPS13A;VWA8;ZMYM2
					Uveal melanoma	0.0058228	39	AKT1;APC;ASAP1;BRAF;BRCA1;BRCA2;CCND1;CD44;CDK2;CDK4;EGF;EGFR;EPHB2;FANCD2;FGFR1;HIF1A;HLA-A;HLA-C;HSP90AA1;LZTS1;MAPK1;MDM2;MYC;NF1;NME1;NOTCH1;PCNA;PIK3CA;PIK3CB;PTEN;RAD51;RPL13A;SETD2;SF3B1;SLU7;TBC1D9;TP53;VCAN;VIM
					Human immunodeficiency virus (HIV) II infection category B1	0.00606477	72	ABCA1;ABCC4;ACTG1;APEX1;BIRC5;BRAF;CCNB1;CDC42;CDK9;CLIP2;CREB1;CUL5;DCAF1;EIF2AK2;EPHB2;FLNA;FLNB;FN1;GCN1;GLI2;GLI3;HDAC6;HLA-A;HLA-C;HNRNPA1;HRAS;HSPA4;ILF2;IPO7;JUN;LCK;MAP2;MAPK1;MAPK14;MYH9;NCAM1;NCL;NES;NR3C1;NUP214;PARP1;PDZD8;PHGDH;PLXNA2;PPARG;PPIA;PROM1;PTEN;RAC1;RELA;SCAF11;SHC1;SIRT1;SKP2;SMARCA5;SOD1;SPEN;SRSF2;STAT1;STAT5B;TBC1D9;TBK1;THBS1;TIAM1;TNPO3;TP53;UBA1;UBA2;UBL5;VDR;WNK1;…
					Aortic Aneurysm, Thoracic	0.00606477	14	EGF;ELN;ERBB2;FBN1;FBN2;FN1;GPX1;HIF1A;HSPA8;NOTCH1;SMAD2;SMAD3;SMARCA4;TSHZ1
					Hypocholesterolemia	0.00606477	14	ABCA1;AKT1;BRAF;CAV1;CCT5;CD44;CDC42;EFNB2;EGF;FASN;MAPK8;PIK3CA;PIK3CB;PTK2
					Isolated somatotropin deficiency	0.00606477	14	ALMS1;FLNB;GLI2;GLI3;GNAS;HERC2;IARS2;IFT172;NR3C1;OTX2;PNPLA6;SIN3A;STAT5B;WASHC5
					Marginal Zone B-Cell Lymphoma	0.00606477	14	AKT1;ATM;CCND1;CDH1;DSP;GSTP1;LONP1;MCL1;MDM2;MLH1;MUM1;MYC;NOS2;TP53
					Metaplasia	0.00606477	14	APC;CDH1;CTNNB1;EGF;EGFR;ESR1;GSTP1;IGF1R;MKI67;PTPN11;SHH;SMARCA2;TIMP2;TP53
					Congenital deafness	0.00608044	43	ADGRV1;AKT1;ARID1A;BCOR;BRAF;CHD7;COL4A3BP;CREBBP;EP300;EXOSC8;FANCA;FANCC;FANCD2;FIG4;FLNA;FMR1;GAS1;GNAS;GPC3;KARS;KAT6B;KCNQ3;KMT2D;LRP4;MED12;MYH9;NOTCH2;NSD2;ORC1;PCLO;PIK3CA;POLA1;PTEN;RAI1;ROR2;RUNX2;SALL1;SF3B4;SIN3A;SMAD4;SMARCA4;SRP72;ZBTB20
					Teratocarcinoma	0.00616986	23	ADAR;APC2;ARHGEF2;CDKN1A;EGF;EPHB2;FBXW11;H2AFX;HDAC2;HLA-A;HRAS;INTS2;KDM5A;KDM5B;MAPK1;NCAM1;NPEPPS;PARP1;PPP4C;RARA;RPSA;TP53;TRRAP
					Acquired cubitus valgus	0.0061943	8	BRAF;CBL;GJA1;NF1;PEX1;PEX5;PTPN11;SOS1
					Enlarged thorax	0.0061943	8	BRAF;CUL7;FBN1;KAT6B;OBSL1;PTPN11;SOS1;SOS2
					Gastric lymphoma	0.0061943	8	ATM;CDH1;JAK2;MLH1;MSH6;MYC;PCNA;TP53
					Plasmablastic lymphoma	0.0061943	8	HLA-C;MTOR;MUM1;MYC;NCAM1;NOTCH1;SDC1;TBC1D9
					Progressive macrocephaly	0.0061943	8	AKT1;NDUFA1;NDUFB3;NDUFB9;NDUFS1;NDUFS4;PIK3CA;PTEN
					Pulmonary Sclerosing Hemangioma	0.0061943	8	AR;ARHGEF2;CTNNB1;EGFR;ERBB2;MAPK1;RPSA;TP53
					Skin toxicity	0.0061943	8	CCND1;EGF;EGFR;FANCD2;GSTP1;LIG3;MLH1;TP53
					Cardiac Arrhythmia	0.00620409	27	ANK2;BRAF;CPT2;CREBBP;EGF;ELN;EP300;GJA1;GPC3;HRAS;JUP;KAT6B;LIG3;PKP2;PTPN11;RPL11;RPL26;RPL35A;RPS17;RPS19;RPS24;RPS28;RPS29;RPS7;SOS1;SOS2;SYNE2
					Malignant neoplasm of tongue	0.00620409	16	BRCA1;CAV1;CCND1;EGF;EZR;FAM168A;HIF1A;NOTCH1;PFDN5;PIK3CA;PTEN;SHH;SP1;TP53;VHL;ZEB1
					Microphthalmos	0.00621226	37	ATF4;ATR;BCOR;BRAF;BUB1;BUB1B;CDK2;CDK4;CHD7;FANCA;FANCC;FANCD2;FGFR1;GJA1;GLI2;GLI3;GRIP1;HDAC6;HRAS;LRP5;LRP6;NOTCH1;OCRL;OTX2;PCNA;PHGDH;PIK3CA;PTCH1;RAB3GAP2;RB1;SHH;SIN3A;SMCHD1;TENM3;TP53;ZEB1;ZNF592
					Machado-Joseph Disease	0.00639275	19	AR;ATM;CDK5;CUL1;EIF4G2;FUS;GEMIN4;HSP90AA1;HSPA4;HTT;PSMD2;PTPN13;SKP1;SOD1;SPTBN2;TP53;TSHZ1;UBB;VCP
					Cervical Squamous Intraepithelial Neoplasia	0.00652588	13	ANXA2;APC;BUB1;EGFR;FN1;HRAS;KDM4B;LAMB2;MLH1;MYC;PCNA;TP53;WDHD1
					pediatric acute myeloblastic leukemia	0.00670731	20	ABCA3;AFDN;ATM;BCR;BIRC5;CREBBP;HDAC1;KAT6B;KDM5A;KMT2A;MDM2;NCAM1;NPM1;NSD1;NUP98;PRDM16;PTPN11;STAT3;TBC1D9;TP53
					Hydrocephalus	0.00670731	38	BRAF;BUB1B;CC2D2A;CDC42;CENPF;CTNND1;DLG5;FGFR1;FLNA;GLI2;GPC3;GRIP1;HDAC6;HRAS;IFT122;KIF1A;KMT2D;MED12;NES;NF1;NOTCH1;NOTCH2;OGDH;PAFAH1B1;PCM1;PIK3CA;PPP2R1A;PPP2R5D;PTCH1;PTEN;SEC24D;SF3B4;SHH;SIN3A;TP53;VHL;WASHC5;ZBTB20
					Abnormal skeletal development	0.00682148	17	AKT1;DCHS1;FLNA;GJA1;GNAS;HSPG2;IFT140;IFT172;LEMD3;NOTCH2;PEX1;PEX5;PTEN;RUNX2;SEC23A;SEC24D;SF3B4
					herpes	0.00692965	15	APC;COL17A1;DST;ERBB2;ESR1;HLA-A;HLA-C;MYH9;MYLK;PCNA;PTEN;STAT1;TP53;URI1;USP7
					Hydronephrosis	0.00692965	21	ATP7A;ATRX;BCOR;BRAF;CHD7;CPT2;EGF;EPHA7;FGFR1;FLNA;GPC3;ITGA6;KAT6B;LTBP4;PEX1;PEX5;PLEC;RBM10;ROR2;SHH;WASHC5
					Tetralogy of Fallot	0.00692965	21	ARVCF;BRAF;CHD7;DICER1;EGF;ELN;FBN1;FIG4;GJA1;HIF1A;JAG1;JARID2;NOTCH1;PBX1;PTPN11;RASA1;RXRA;SALL1;SEC24C;SF3B4;WASHC5
					Rotavirus Infections	0.00694652	12	CRK;EIF4G1;HSPA8;JUN;MAPK1;MAPK14;MAPK8;MMRN1;NUP155;SMAD3;STAT1;TP53
					Chronic Obstructive Airway Disease	0.00695038	119	ABCA1;ABCC4;AKAP12;AKT1;ANXA2;APAF1;APC;APEX1;ATF4;ATM;AURKA;BARD1;BCR;BLM;BRCA1;BRCA2;CAV1;CCND1;CDC6;CDH1;CDK4;CDK5;CDK7;CFTR;CHEK1;CREBBP;CSTF1;CTNNB1;CUL3;DDX1;EGF;EGFR;ELN;ERBB2;ESR1;EZR;FANCA;FN1;GPX1;GSK3B;GSTP1;HADHA;HDAC2;HDAC3;HIF1A;HLA-A;HLA-C;HSD17B4;HSPA4;HSPD1;IGF1R;IGF2R;INSR;IRS1;JUN;KMT2A;LIG3;LRP5;LRP6;LTBP4;MAML3;MAP1B;MAPK14;MDM2;MIB1;MLH1;MMRN1;MPDU1;MSH2;MSH3;MSH6;MTHFD1;MTH…
					Gastrinoma	0.00696295	9	APC;CD44;CDH1;EGF;EGFR;ERBB2;IGF1R;SMAD4;TP53
					Hammer Toe	0.00696295	9	AARS;BCOR;FBN1;GARS;HSD17B4;KIF1B;MFN2;SACS;VCP
					Overfolded helix	0.00696295	9	ARVCF;BCOR;CHD7;CPT2;EFTUD2;HSPG2;LONP1;SALL1;SEC24C
					Papillary adenocarcinoma	0.00696295	9	AKT1;BRAF;EGFR;ERBB2;HRAS;MLH1;MSH3;PIK3CA;PTEN
					Plagiocephaly, Nonsynostotic	0.00696295	9	DYNC1H1;EFNB1;FGFR1;HERC2;HRAS;KAT6A;MED12;PPP2R1A;ZBTB20
					Steroid-resistant nephrotic syndrome	0.00696295	9	ACTN4;CRB2;FAT1;NUP107;NUP205;NUP93;SMARCAL1;TBC1D9;XPO5
					Mental Retardation, X-Linked	0.00717654	26	AFF2;AR;ATR;ATRX;BRWD3;CALR;CASK;CHD3;CUL4B;FGD1;FMR1;HCFC1;HUWE1;KDM5C;KIAA1109;MED12;OCRL;PJA1;SMARCA1;SMARCA2;SMARCA4;SMS;UPF3B;WNK3;ZMYM2;ZMYM3
					Abnormally-shaped vertebrae	0.00717654	11	AKT1;CTBP1;FGFR1;FLII;FLNA;LRP5;NSD2;PTEN;RAI1;SEC24D;VDR
					Atypical Ductal Breast Hyperplasia	0.00717654	11	AKT1;AP2S1;BRCA1;BRCA2;CCND1;EPHA3;ERBB2;ESR1;INTS2;PIK3CA;TP53
					EAR, PATELLA, SHORT STATURE SYNDROME	0.00717654	11	ATR;CDC45;CDC6;GMNN;INSR;MCM2;MTOR;MYH9;ORC1;ORC3;ORC4
					Hyperpigmentation	0.00717654	11	APC;BRAF;DKC1;HRAS;LEMD3;MYO5A;NOP10;RBM28;RPL27A;SEC23A;TNPO3
					Parkinson Disease, Familial, Type 1	0.00717654	11	CRK;CRMP1;DNAJC13;EIF4G1;EPHB2;GSK3B;MAPK1;MAPK14;MAPK8;UTRN;VPS35
					Endometrial adenocarcinoma	0.00717861	25	APC;AR;BIRC5;CAV1;CDKN1A;DLL1;EGF;EGFR;EIF4E;EPHB2;ERBB2;ESR1;FASN;HIF1A;INTS2;MAPK1;MDM2;MSH2;NOTCH1;PCNA;PTEN;RARA;RB1;STAT3;TP53
					Deafness	0.00719043	51	AKT1;ARID1A;BCOR;BRAF;CHD7;COL4A3BP;CREBBP;EP300;EXOSC8;FANCA;FANCC;FANCD2;FIG4;FLNA;FMR1;GJA1;GNAS;GPC3;GSTP1;JAG1;KARS;KAT6B;KMT2D;LRP4;MED12;MYH9;MYO6;NOTCH2;NSD2;OPA1;ORC1;PCLO;PIK3CA;POLA1;POLD1;PPARG;PTEN;PTPN11;RAI1;ROR2;RUNX2;SALL1;SF3B4;SGO2;SIN3A;SMAD4;SMARCA4;SOD1;SOS1;SRP72;ZBTB20
					Acute biphenotypic leukemia	0.00720334	10	ABL1;BCR;DLL1;KAT6A;KMT2A;KMT2B;KMT2D;NCOA2;NUP98;YY1
					Flat back of the head	0.00720334	10	DPM1;INPPL1;KIF11;LEMD3;PEX1;PEX5;PTCH1;UBE3A;VDR;ZNF592
					Flat occiput	0.00720334	10	DPM1;INPPL1;KIF11;LEMD3;PEX1;PEX5;PTCH1;UBE3A;VDR;ZNF592
					Noncancerous mole	0.00720334	10	AKT1;BRAF;HRAS;PIK3CA;PTCH1;PTEN;PTPN11;RBM28;SEC23B;SMARCAL1
					Human T-cell lymphotropic virus 1 infection	0.00761635	16	AKT1;ATF7IP;CCNB1;HLA-C;IARS;LRP1;MAGI1;PCNA;PIK3CA;PIK3CB;RPSA;SERPINH1;TAX1BP1;THBS1;TP53;TXN
					Dilated ventricles (finding)	0.00765336	30	ANKRD11;APC2;BUB1B;CLP1;COL4A2;CPT2;CTBP1;DKC1;FIG4;FLII;HERC2;HRAS;HSD17B4;KANK1;KIF1A;KMT2D;NSD2;OCRL;PAFAH1B1;PIK3CA;PPP2R1A;PPP2R5D;PTCH1;RAI1;SETD2;SLC12A6;SMC1A;TRIM37;VPS13A;XPR1
					Epstein-Barr Virus Infections	0.00767686	34	APC;ARID1A;ATM;ATR;BCR;CCND1;CD44;CDH1;CRK;EGFR;ERBB2;HLA-A;HLA-C;ITGA6;JAG1;MAPK1;MAPK14;MAPK8;MDM2;MLH1;MYC;NME1;PIK3CA;PIK3R1;PTPRD;RELA;SF3B6;SMARCA1;STAT3;TBC1D9;TP53;VIM;WNK1;ZEB1
					Borderline ovarian tumour	0.00771446	7	AR;BRCA1;BRCA2;DNMT1;ERBB2;NCOA3;TP53
					Carcinoma of extrahepatic bile duct	0.00771446	7	APC;CCND1;MIB1;MKI67;MLH1;MSH2;TP53
					Fibrolamellar hepatocellular carcinoma	0.00771446	7	APC;CCND1;CDH1;EGFR;ERBB2;TP53;TPT1
					Maturation defect	0.00771446	7	DHX16;LSM2;NCOA1;NCOA2;PRPF8;RPS19;SRC
					Pulmonary Valve Stenosis	0.00771446	7	BRAF;ELN;JAG1;NF1;PTPN11;SOS1;STAT3
					Subependymal Giant Cell Astrocytoma	0.00771446	7	BRAF;DPYSL3;HIF1A;MTOR;MYC;TP53;TSC2
					breast cancer (non-specific) premenopausal	0.00771446	7	BRCA1;CCND1;CD44;ESR1;RSF1;TP53;VDR
					Hepatitis, Chronic	0.00778164	29	ANXA2;ATP7A;AURKB;BCR;CALR;CDH1;CKS1B;CKS2;DNMT1;FN1;GPX1;GSTP1;MDM2;MKI67;MYC;NCAM1;NGF;NNT;NOTCH3;PLK1;PLXNA2;SMAD2;SMAD3;SOD1;STAT1;STAT3;TERF1;TP53;VDR
					Prolactinoma	0.0078545	20	CCND1;CDH1;CDKN1A;EGFR;ERBB2;ESR1;FLNA;GNAS;LRPPRC;MIB1;MKI67;MSH6;MYC;NCAM1;NGF;PCNA;PPARG;PTTG1;STAT5B;TP53
					Developmental delay (disorder)	0.00795559	36	AHDC1;APC;ARID2;CD44;CENPE;CHD8;CUL4B;DICER1;EFNB1;FMR1;HDAC4;HERC2;HSPA4;IGF1R;LEMD3;LRP5;MACF1;NDUFA1;NF1;NGF;OTX2;PAFAH1B1;PHGDH;POGZ;PTCH1;PTEN;RAB3GAP2;RAI1;SALL4;SF3B6;UBE3A;UBE3B;USP9X;WDTC1;YWHAE;ZBTB20
					Abnormality of earlobe	0.00802332	4	BCR;CUL4B;GLI3;MAPK1
					Acinar cell carcinoma of pancreas	0.00802332	4	APC;BRCA1;BRCA2;TP53
					Acute Myeloid Leukemia with Myelodysplasia-Related Changes	0.00802332	4	ASXL1;KMT2A;TP53;U2AF1
					Adenoid Cystic Breast Carcinoma	0.00802332	4	ESR1;PIK3CA;PTEN;TP53
					Axillary freckling	0.00802332	4	MLH1;MSH2;MSH6;NF1
					Brenner Tumor	0.00802332	4	EGFR;MYC;PIK3CA;TP53
					Carcinoma of apocrine gland	0.00802332	4	AR;CDH1;ERBB2;ESR1
					Chromosomal breakage induced by crosslinking agents	0.00802332	4	BRCA2;FANCA;FANCC;FANCD2
					Curly eyelashes	0.00802332	4	NIPBL;RAD21;SMC1A;SMC3
					Esophageal Small Cell Neuroendocrine Carcinoma	0.00802332	4	BRCA2;PAK1;PARP1;PTEN
					Familial meningioma	0.00802332	4	MN1;NF1;NF2;PTEN
					Grade III Chondrosarcoma	0.00802332	4	CDK4;HIF1A;MDM2;MYC
					Hemangioma of liver	0.00802332	4	HIF1A;NPM1;SETD2;VHL
					Intracortical osteosarcoma	0.00802332	4	CDK4;ERBB2;STAT3;TP53
					Leukemia, Prolymphocytic, B-Cell	0.00802332	4	BRAF;CCND1;RB1;TP53
					Medullary carcinoma of breast	0.00802332	4	BRCA1;ERBB2;ESR1;TP53
					Mesenchymal Glioblastoma	0.00802332	4	EGF;HDAC4;NF1;TP53
					Metastatic Endometrial Carcinoma	0.00802332	4	EGF;EGFR;PIK3CA;PIK3CB
					NEUROFIBROMATOSIS, TYPE 1-LIKE SYNDROME	0.00802332	4	EPHB2;MAPK1;NF1;RASA1
					Papillary transitional cell carcinoma	0.00802332	4	EGF;ERBB2;HRAS;TP53
					Pectus excavatum inferiorly	0.00802332	4	BRAF;NF1;PTPN11;SOS1
					Schimke immunoosseous dysplasia	0.00802332	4	ELN;SMARCA2;SMARCA4;SMARCAL1
					Serous cystadenocarcinoma ovary	0.00802332	4	AKT1;ESR1;PIK3CA;PIK3CB
					Thyroid Gland Spindle Cell Tumor with Thymus-Like Differentiation	0.00802332	4	EPHA3;ESR1;EWSR1;NGF
					Carcinoma, Pancreatic Ductal	0.00802332	17	ACTN4;APEX1;ATM;ATR;BRCA2;CHEK1;CTNND1;HIF1A;JAG1;MDM2;NOTCH1;NOTCH3;PCNA;PPARG;SMAD4;THBS1;TP53
					Basal cell carcinoma	0.00808754	25	BRCA1;BRCA2;DICER1;EGFR;ERBB2;GLI2;GPX1;GSTP1;HRAS;IGF1R;MCL1;MLH1;MSH2;MSH3;MSH6;NDUFA1;PARP1;PIK3CA;PTCH1;RASA1;RB1;STAT3;TP53;TP53BP1;VDR
					Stevens-Johnson Syndrome	0.00810613	13	CAV1;CTNNB1;CUL1;EGFR;EP300;HLA-A;HLA-C;HSPG2;NOS2;PARP1;RB1;RBX1;VCP
					Chagas Disease	0.00810739	24	ADGRL1;ADGRL2;APC;CALR;CCND1;HLA-A;HLA-C;HSP90AA1;HSPA4;HSPD1;KRT8;NGF;NOS2;ODC1;PIK3CA;PIK3CB;PPARG;STAT1;TBK1;TCP1;THBS1;TP53;VIM;WDTC1
					Noonan Syndrome	0.00833861	15	AR;ARHGEF2;BRAF;CBL;EPHB2;HRAS;KAT6B;MAPK1;NF1;PTPN11;PTPRU;SOS1;SOS2;STAT3;STAT5B
					Cockayne Syndrome	0.00849527	18	APEX1;ATR;BLM;CHEK1;FEN1;HSPA9;MAPK8;NEFM;POLD1;SIRT1;SMARCA1;SMARCA2;SMARCA4;TBC1D9;TERF1;TP53;USP7;XAB2
					Growth Disorders	0.00849527	18	ATP7A;ATRX;BSN;BUB1B;CBL;CFTR;FGD1;HIST1H1D;IGF1R;JAK2;NF1;NR3C1;NSD1;PIK3CA;PPARG;PTPN11;RAI1;SH3PXD2B
					Umbilical hernia	0.00849527	18	ATP7A;ATRX;CHD7;EFNB1;FGD1;GPC3;HDAC4;HSPG2;INSR;LRP2;LTBP4;MED12;NOTCH2;NOTCH3;PTCH1;ROR2;SALL1;SMAD3
					Polycystic Kidney, Autosomal Dominant	0.00867984	29	ADCY6;CDK4;CFTR;CREB1;CRK;DNER;EGF;EGFR;ERBB2;ESR1;EXOC4;FBN1;HLA-A;HSP90AA1;ITGA6;JUN;MAPK1;MAPK14;MTOR;MYC;NF1;PCNA;PKD1;PPARG;PRKD1;RPS19;SMAD2;STAT3;TSC2
					Myeloid neoplasm	0.00877594	12	ABL1;BCR;CLTC;JAK2;KDM5A;KMT2A;NPM1;NUP98;PLK2;PTPN11;SRSF2;U2AF1
					Primary Carcinoma	0.00877594	12	BRAF;CCND1;EGFR;ERBB2;LPCAT1;MLH1;NME1;ODC1;SMAD4;THBS1;TP53;ZNF217
					Adrenal Gland Neoplasms	0.00886352	19	ACACA;ATM;BMS1;CD44;CDC42;CDKN1A;CTNNB1;GNAS;IGF1R;MSH2;MYC;NF1;NR3C1;PRKACB;RB1;SMAD2;TERF1;TP53;VHL
					Hearing Loss, Partial	0.00892917	48	AKT1;ARID1A;BCOR;BRAF;CHD7;COL4A3BP;CREBBP;EP300;EXOSC8;FANCA;FANCC;FANCD2;FIG4;FLNA;FMR1;GJA1;GNAS;GPC3;GSTP1;KARS;KAT6B;KMT2D;LRP4;MED12;MYH9;MYO6;NOTCH2;NSD2;ORC1;PCLO;PIK3CA;POLA1;PPARG;PTEN;PTPN11;RAI1;ROR2;RUNX2;SALL1;SF3B4;SGO2;SIN3A;SMAD4;SMARCA4;SOD1;SOS1;SRP72;ZBTB20
					AMYOTROPHIC LATERAL SCLEROSIS 2, JUVENILE (disorder)	0.00892917	8	ALS2;FUS;PTBP1;SETX;SOD1;SOS1;SPG11;SRRM2
					Cervical dysplasia	0.00892917	8	CDC6;EGFR;ESR1;MCM5;PTEN;RPS19;STAT3;TP53
					Congenital anomaly of neck	0.00892917	8	BAZ1B;CLIP2;ELN;FIG4;GTF2I;PPARG;PTCH1;RFC2
					Deformity of neck	0.00892917	8	BAZ1B;CLIP2;ELN;FIG4;GTF2I;PPARG;PTCH1;RFC2
					Hemangioma, Cavernous	0.00892917	8	AKT1;BRAF;HRAS;NOTCH1;PIK3CA;PTEN;SEC23B;SMAD4
					Lichen Sclerosus et Atrophicus	0.00892917	8	CCND1;MIB1;MKI67;MMRN1;PCNA;SMAD3;THBS1;TP53
					Malformation of the neck	0.00892917	8	BAZ1B;CLIP2;ELN;FIG4;GTF2I;PPARG;PTCH1;RFC2
					Neonatal Systemic lupus erythematosus	0.00892917	8	CALR;HLA-C;PHGDH;PTBP1;SNRNP70;SPTAN1;SRRM2;SSB
					Perianal Squamous Intraepithelial Neoplasia	0.00892917	8	CD44;CDKN1A;COL17A1;EGF;NOTCH1;PCNA;PTTG1;TP53
					Severe depression	0.00892917	8	ASXL1;CALM2;ESR1;HTR2C;MTR;PAFAH1B1;SF3B1;YWHAE
					Autism Spectrum Disorders	0.00892917	74	ADNP;AFF2;ANK3;ANKRD11;APC;AR;CACNA1H;CAPRIN1;CASK;CDH2;CHD2;CHD7;CHD8;CTNND2;CYFIP1;EGF;EHMT1;EIF4E;EPHB2;FMR1;GLI3;GSTP1;GTF2I;HERC2;HLA-A;HRAS;HTR2C;IRS2;JARID2;JMJD1C;LRP2;MAPK1;MIB1;MKI67;MPDZ;MTOR;NBEA;NDUFS1;NEO1;NGF;NOS2;NOTCH1;NR3C1;PAFAH1B1;PARK7;PIK3CA;PIK3CB;PLCB1;POGZ;PPP2R5D;PTBP1;PTEN;RAI1;RANBP1;RFC1;SETD1A;SETD2;SIN3A;SLU7;SMARCA2;SND1;SNRNP70;SRRM2;SYNE1;TCF20;TET1;TET3;TRIO;TSC…
					Hypertrophic disorder of skin, unspecified	0.00892917	16	AKAP13;BRAF;CDC42;CDK2;CRK;HDAC2;HDAC4;LRPPRC;MAPK1;MAPK14;PIK3CA;PIK3CB;PRKD1;PTPN11;PTTG1;RACK1
					Stereotypic Movement Disorder	0.00892917	16	ADNP;ATM;BCR;COL4A3BP;CREBBP;CTBP1;EP300;FLII;NOTCH1;NPC2;NSD2;OCRL;RAI1;SF3B1;TP53;VCP
					Adams Oliver syndrome	0.00892917	6	CDC42;DOCK6;EGF;NOTCH1;RAC1;SMAD3
					Alobar Holoprosencephaly	0.00892917	6	CDON;DLL1;GAS1;GLI2;PTCH1;SHH
					Autosomal Recessive Parkinsonism	0.00892917	6	ATP13A2;KARS;PARK7;PTEN;SYNJ1;VPS13C
					Benign symmetrical lipomatosis	0.00892917	6	MFN2;MTOR;PIK3CA;PIK3CB;PNPLA6;PTEN
					Chromosome 10, monosomy 10q	0.00892917	6	DOCK1;EGFR;PHLDB1;PIK3CA;PTEN;SHH
					Congenital dislocation of radial head	0.00892917	6	ATR;CREBBP;EP300;FLNA;NIPBL;NOTCH2
					Familial primary pulmonary hypertension	0.00892917	6	CAV1;EIF2AK4;HDAC1;HDAC4;HDAC5;SRC
					Hand polydactyly	0.00892917	6	BLM;EFNB1;PIK3CA;PNPLA6;PTEN;SHH
					Idiopathic scoliosis	0.00892917	6	CALM1;CALM2;CALM3;CHD7;ESR1;HSPG2
					Pineal Gland Neoplasm	0.00892917	6	APC2;CDK2;EGF;NPEPPS;RB1;TP53
					Semilobar Holoprosencephaly	0.00892917	6	CDON;DLL1;GAS1;GLI2;PTCH1;SHH
					Trichoepithelioma	0.00892917	6	BRAF;HIF1A;HRAS;MTOR;PTCH1;SETD2
					Skin Erosion	0.00893975	20	ASXL1;ATM;ATP2C1;BRCA1;CD44;CDKN1A;DSP;H2AFX;HSP90AA1;JUP;PAFAH1B1;PLEC;PPIA;SF3B1;SIRT1;TERF2;TP53;TYRO3;VIM;YWHAE
					Obsessive-Compulsive Disorder	0.00911809	21	ADNP;AFF2;BAZ1B;CDH2;CHD7;CLIP2;ELN;ESR1;FMR1;GTF2I;HTT;MED12;MEIS2;NIPBL;OCRL;PBX1;RAD21;RFC2;SMC1A;SMC3;UBE3A
					Babinski Reflex	0.0091197	25	ATP13A2;CAV1;CCT5;FTL;HSPD1;KDM5C;KIF1A;KIF1C;KIF5A;MFN2;NDUFA1;NDUFB3;NDUFB9;NDUFS1;NDUFS4;OPA1;PNPLA6;POLR3A;POLR3B;SACS;SETX;SPAST;VCP;WASHC5;ZFYVE26
					Malignant Squamous Cell Neoplasm	0.0091197	25	AR;BLM;CCND1;CDK2;DKC1;EGF;EGFR;EIF4E;FANCD2;FGFR1;GPX1;IGF1R;INTS2;LZTS1;MDM2;MLH1;MSH2;MTOR;NOTCH1;PIK3CA;PIK3CB;PTEN;TBC1D9;TP53;USP1
					Comedone	0.0091197	11	ATM;BRCA1;CCND1;EGF;EGFR;ERBB2;ESR1;MYC;NME1;PARP1;TP53
					Facial asymmetry	0.0091197	11	ATR;CHD7;EFNB1;GNAS;HRAS;NBAS;PIK3CA;PPP2R1A;SIN3A;SLC12A6;SMS
					Cirrhosis	0.00916036	58	ABCC4;AKT1;APC;APEX1;AURKB;AXIN1;BCL9;CALR;CAV1;CDH1;CDKN1A;CKS1B;CKS2;CTNNB1;DCLK1;DDR1;DDX5;DENND4A;DNA2;DNMT1;EGF;EGFR;ERBB2;ESR1;FBN2;FN1;GLI2;GMNN;GPX1;GSTP1;HIF1A;HLA-A;HLA-C;HSPG2;IGF1R;JAG1;KRT8;MCM2;MDM2;MLH1;MMRN1;MSH6;NGF;NOS2;NOTCH3;NPC2;PAPSS1;PCNA;RAC1;RB1;SCAF1;SMARCA2;STAT1;STAT3;TBC1D9;TP53;VIM;ZEB1
					Lung diseases	0.00917172	52	ABCA3;AP3B1;APC;CD44;CDK9;CDKN1A;CFTR;COPA;CREB1;CTNND2;CTSC;EGF;EGFR;ELN;EZR;FLNB;FN1;GPX1;GSTP1;HDAC3;HIF1A;HNRNPA2B1;HSPD1;IGF1R;IGF2R;INSR;JUN;LCK;MAPK8;MARS;MMRN1;MTOR;MYLK;NR3C1;PPARG;PRKDC;PTCH1;PTEN;PTK2;RPL32;SHH;SIRT1;SLC9A3R1;STAT3;STAT5B;TP53;TSC2;VCAN;VDR;VIM;XRCC6;YY1
					Pituitary Adenoma	0.00917799	47	AKT1;APC;BRAF;CCND1;CD44;CDH1;CDK4;CTNNB1;DDR1;DKC1;DNMT1;EGF;EGFR;ESR1;FN1;FYN;GNAS;GRK2;GSK3B;GSTP1;HIF1A;HMGA1;LRPPRC;MALAT1;MIB1;MKI67;MSH6;MTOR;MYC;NCAM1;NES;NR3C1;PIK3CA;PIK3CB;PPARG;PROM1;PTEN;PTPRF;PTTG1;RARS;RB1;SMAD3;SOD1;ST8SIA4;TIMP2;TP53;TSC2
					Gastrointestinal Neoplasms	0.00918874	23	AKT1;APC;BLM;BRCA2;CALR;CBL;CD44;CREB1;CTNNB1;EGF;EGFR;EPHB2;ERBB2;EWSR1;GSTP1;HRAS;MLH1;MSH2;PTEN;RAD21;SHH;SMAD4;TP53
					Asthma	0.00919771	161	ABCA1;ACSL3;AHNAK;AKAP13;ALMS1;ANXA2;APC;AR;ARFGEF1;ARHGEF2;ATM;ATP5A1;AURKB;BIRC5;BRD8;CALM1;CALM2;CALM3;CARM1;CAV1;CD44;CDH1;CDKN1A;CFTR;CHEK1;CREB1;CREBBP;CRK;CTNNA1;CTNNAL1;CTNND1;CTTN;CYFIP2;DDX1;DLL1;DNER;DNMT1;DOCK1;EGF;EGFR;EIF2AK2;EIF4E;ELN;EPHB2;ESR1;EZR;FLNC;FMR1;FN1;FYN;GNAS;GPX1;GRK2;GSN;GSTP1;HDAC1;HDAC2;HDAC6;HDAC9;HIF1A;HIST1H4A;HIST1H4B;HIST1H4C;HIST1H4D;HIST1H4E;HIST1H4H;HIST1H4…
					Pneumonitis	0.00930171	43	ABCA1;ABCA3;APC;APEX1;ARHGEF2;ATM;CAV1;CD44;CFTR;CREBBP;CRK;ELN;EPG5;GEMIN4;HIF1A;HSPA4;IGF2R;JUN;LRPPRC;MAPK1;MAPK14;MAPK8;MCL1;MTOR;NBR1;NEO1;NR3C1;PARP1;PHLPP2;PLXNC1;PPARG;RAD51;RPS19;SCAF11;SIRT1;STAT3;TAGLN;TIMELESS;TP53;TTF1;TXN;VDR;XPR1
					Congenital clubfoot	0.00930171	30	APAF1;ATRX;CTBP1;DCHS1;DST;FLNA;FLNB;FRAS1;GLI3;GPC3;GRIP1;HRAS;HSD17B4;HSPG2;KAT6B;KDM5C;MEGF8;NCOR2;NSD2;ORC1;PEX1;PEX5;PI4KA;PLXND1;RAB3GAP2;RBM10;REV3L;SF3B4;SMS;ZNF592
					Obesity	0.00930171	240	ABCA1;ABL1;ACACA;ACLY;ADAMTS9;ADCY3;ADGRV1;ADNP;AKT1;ALMS1;APC;APC2;AR;ASAP1;ASPM;ATF4;ATM;ATP2B1;ATP5A1;ATP5E;BAZ1B;BMS1;BRAF;BRCA1;CAD;CALM1;CALM2;CALM3;CALR;CAPN1;CAV1;CCAR2;CCND1;CD44;CDH2;CDK4;CDK5;CDKN1A;CHEK1;CLIP2;CMAS;CNR1;COX7C;CPT2;CREB1;CREBBP;CRK;CTBP1;CTNNB1;CUL4B;DDR1;DICER1;DLL1;DNMT1;EFNB1;EGFR;EHMT1;EIF2AK2;ELN;EP300;EPHB2;ERBB2;ESR1;FASN;FAT1;FGFR1;FLII;FLNA;FN1;FTL;FYN;GJA1;GN…
					Abnormal dermatoglyphic pattern	0.00930171	9	BRAF;HRAS;KAT6B;KMT2D;PTPN11;RAB3GAP2;RB1;SOS1;SOS2
					Depressed cheekbone	0.00930171	9	BAZ1B;BLM;BRAF;CLIP2;ELN;GTF2I;RFC2;RUNX2;SF3B4
					Flattening of the zygomatic bone	0.00930171	9	BAZ1B;BLM;BRAF;CLIP2;ELN;GTF2I;RFC2;RUNX2;SF3B4
					Hypoplasia of the zygomatic bone	0.00930171	9	BAZ1B;BLM;BRAF;CLIP2;ELN;GTF2I;RFC2;RUNX2;SF3B4
					Hypoplasia of thumb	0.00930171	9	FANCA;FANCC;FANCD2;FBN1;FLNA;NSD2;RPS19;SIN3A;UBE2T
					Hypotrophic cheekbone	0.00930171	9	BAZ1B;BLM;BRAF;CLIP2;ELN;GTF2I;RFC2;RUNX2;SF3B4
					Liposarcoma, well differentiated	0.00930171	9	AKT1;CDK4;EGFR;JUN;KNTC1;MDM2;PTEN;TP53;TYRO3
					Oestrogen deficiency	0.00930171	9	AKT1;BRCA1;ESR1;HIF1A;MYC;PPP2CA;RB1;RBBP4;TJP1
					Refractory anemia, without ringed sideroblasts, without excess blasts	0.00930171	9	AR;ASXL1;CBL;JAK2;PAFAH1B1;RARS;SF3B1;TP53;YWHAE
					Small cheekbone	0.00930171	9	BAZ1B;BLM;BRAF;CLIP2;ELN;GTF2I;RFC2;RUNX2;SF3B4
					Spastic gait	0.00930171	9	CCT5;HSPD1;KIF1A;KIF5A;SPAST;TECPR2;VCP;WASHC5;ZFYVE26
					Bowen's Disease	0.00930807	10	CD44;CDKN1A;COL17A1;EGF;MAPK1;NOTCH1;PCNA;PTTG1;STAT3;TP53
					Lymphocytic infiltration	0.00930807	10	APAF1;BRAF;BRCA1;CCND1;ERBB2;ESR1;HLA-C;PCNA;POLE;TP53
					Pyruvate Carboxylase Deficiency Disease	0.00930807	10	AR;EGFR;EPHB2;ERBB2;HLA-A;NPEPPS;OGDH;PRDX4;SDC1;TBC1D9
					Small testicle	0.00935466	17	ATRX;CFTR;CHD7;CUL4B;CUL7;DKC1;FBN1;FGFR1;FMR1;GLI2;GLI3;HSPG2;MAP3K1;OTX2;PHGDH;POLR3B;USP9Y
					Absent frontal sinuses	0.00941327	5	ATRX;FLNA;NOTCH2;RUNX2;TRIM37
					Aplasia of frontal sinus	0.00941327	5	ATRX;FLNA;NOTCH2;RUNX2;TRIM37
					Atypical polypoid adenomyoma	0.00941327	5	CCND1;CDKN1A;CTNNB1;MLH1;PCNA
					Benign neoplasm of liver	0.00941327	5	MIB1;MKI67;PCNA;STAT3;TBC1D9
					Cystadenofibroma	0.00941327	5	ARID1A;CKS1B;PCNA;PIK3CA;SKP2
					Exencephaly	0.00941327	5	CECR2;GTF2I;HSPG2;KDM2B;TP53
					Jaw Keratocyst	0.00941327	5	CCND1;GLI2;PCNA;PTCH1;TP53
					Kidney Medullary Carcinoma	0.00941327	5	ABL1;CCND1;MTOR;PTEN;VCL
					Liver Diseases, Parasitic	0.00941327	5	GNAS;KMT2C;ROBO2;SMAD4;TP53
					Melanoma, Experimental	0.00941327	5	CALR;FASN;HIF1A;PXN;SETD2
					Mixed Tumor, Mullerian	0.00941327	5	AKT1;MDM2;NBR1;PROM1;ZEB1
					Overfriendliness	0.00941327	5	BAZ1B;CLIP2;ELN;GTF2I;RFC2
					Splanchnic vein thrombosis	0.00941327	5	ABL1;BCR;CALR;JAK2;SP1
					Syringomyelia	0.00941327	5	ABCA1;HEATR6;NOTCH3;RUNX2;VDR
					stage, pancreatic cancer	0.00941327	5	EGFR;EPHB2;MAPK1;PIK3CA;PIK3CB
					Hypothyroidism	0.00962256	35	AKT1;ALMS1;ANXA2;BRAF;CALM1;CALM2;CALM3;CAV1;CDON;CHD7;FMR1;GNAS;GPX1;HLA-A;HLA-C;JAG1;LRBA;LRP1;MAGI3;MARS;MED12;NCAM1;NCOA2;NCOR1;NCOR2;NEFM;PCNA;PDE3B;PER1;PIK3CA;PTEN;SALL1;STAT1;TSC2;TTF1
					Progressive disorder	0.00962382	32	AKT1;DNMT1;DPM1;FIG4;FTL;GNAS;HK1;HSPD1;KIF1A;KIF1C;KIF5A;LEMD3;LRBA;MARS;NDUFS4;PABPN1;PCLO;PCNA;PNPLA6;POLG;POLR3A;POLR3B;SBF1;SETX;SLC12A6;SPAST;SYNJ1;TBK1;VPS13A;WASHC5;XPR1;ZFYVE26
					Nystagmus	0.00969334	62	AARS;ALMS1;AP3B1;ARID1A;ATM;ATP5A1;BRAF;BUB1B;CASK;CAV1;CHD7;CLP1;CTBP1;DPM1;EEF2;EFNB1;FGFR1;FMR1;GNAS;HSD17B4;HSPD1;IARS2;IFT140;IFT172;KIAA0556;LAMB2;LYST;MPDU1;MYO5A;NDUFA1;NDUFB3;NDUFB9;NDUFS1;NDUFS4;NIPBL;NSD2;OCRL;OPA1;OTX2;PEX1;PEX5;PHGDH;PLXNA2;PNPLA6;POLG;PROM1;PRPF31;PRPF4;PRPF6;PRPF8;RARS;RNF216;SACS;SIN3A;SMARCA4;SNRNP200;SPAST;SYNE1;UBE3A;VHL;ZNF423;ZNF592
					Acute monocytic leukemia	0.00969698	18	CD44;CREBBP;EP300;EPS15;KAT6A;KMT2A;MCL1;NCAM1;NF1;NME1;NPM1;PTPN11;RELA;RPTOR;TIMP2;TP53;VDR;WNK1
					Palmoplantar Keratosis	0.00980033	15	AKT1;BRAF;CFTR;CTSC;DSP;GJA1;JUP;KANK2;PIK3CA;PLEC;POMP;PTEN;RARA;SASH1;SEC23B
					Abetalipoproteinemia	0.00980033	13	ABL1;BCR;CBL;GRB2;HADHA;HIF1A;KMT2A;MAP3K1;NPM1;PIK3C2A;PPARG;PTPN11;VPS13A
					Cardiovascular Abnormalities	0.00980033	13	AKT1;DDX18;DSP;ELN;FBN1;NF1;NOS2;PAFAH1B1;PIK3CA;PKD1;PTEN;TIAM1;YWHAE
					Right Ventricular Hypertrophy	0.00980033	13	AKT1;CDKN1A;ELN;GRK2;HDAC1;HDAC5;MED13;MTOR;NOTCH1;NOTCH3;PPARG;PPIA;PTEN
					Neurogenic Muscular Atrophy	0.0099143	31	AARS;AR;ATM;DCTN1;DHTKD1;FIG4;FLNA;FUS;GNAS;HNRNPA1;HNRNPA2B1;HSPG2;INSR;KIF1A;NDUFA1;NDUFB3;NDUFB9;NDUFS1;NDUFS4;OGDH;PFKM;PLEC;POLG;RBM28;SLC12A6;SMCHD1;SOD1;TBK1;UNC13A;VCP;VPS13A
					Neurogenic muscle atrophy, especially in the lower limbs	0.0099143	31	AARS;AR;ATM;DCTN1;DHTKD1;FIG4;FLNA;FUS;GNAS;HNRNPA1;HNRNPA2B1;HSPG2;INSR;KIF1A;NDUFA1;NDUFB3;NDUFB9;NDUFS1;NDUFS4;OGDH;PFKM;PLEC;POLG;RBM28;SLC12A6;SMCHD1;SOD1;TBK1;UNC13A;VCP;VPS13A
					Skeletal muscle atrophy	0.0099143	31	AARS;AR;ATM;DCTN1;DHTKD1;FIG4;FLNA;FUS;GNAS;HNRNPA1;HNRNPA2B1;HSPG2;INSR;KIF1A;NDUFA1;NDUFB3;NDUFB9;NDUFS1;NDUFS4;OGDH;PFKM;PLEC;POLG;RBM28;SLC12A6;SMCHD1;SOD1;TBK1;UNC13A;VCP;VPS13A
					Testicular Germ Cell Tumor	0.0102263	20	AKT1;AR;ATF7IP;CCND1;CDKN1A;DNMT1;ESR1;GCNT1;GNAS;GPC3;GSTP1;HSD17B4;JUP;MLH1;MSH2;PIK3CA;PIK3CB;PTEN;TP53;TRO
					Primary Myelofibrosis	0.0102535	30	ABL1;AKT1;ASXL1;BCR;BRCA2;CALR;CBL;FN1;HDAC6;HDAC9;JAK1;JAK2;JARID2;LDHB;LEF1;MMRN1;MTOR;NPM1;NR3C1;PAFAH1B1;PTK2;RARS;SF3B1;SRSF2;STAT3;STAT5B;THBS1;TP53;YWHAE;ZMYM2
					Dental caries	0.0102874	24	AMBN;AP3B1;ARVCF;ATR;BCOR;BCORL1;CAV1;CFTR;COL17A1;DKC1;EP300;GJA1;KIF1A;MPPED2;NOP10;PLEC;RBM28;RUNX2;SEC23A;SEC24C;SMAD4;TIMP2;TP53;VDR
					Congenital anomaly of face	0.0103646	23	ACSL3;ANKRD11;ATP7A;C2CD3;CASK;CAV1;CRK;ELN;ETFA;FGFR1;FLNA;HDAC4;HSD17B4;IGF1R;INSR;LRP2;PAFAH1B1;PEX5;POLE;PPARG;PTPN11;VPS13B;YWHAE
					Sensorineural Hearing Loss (disorder)	0.0103978	62	ACTG1;ATP1A1;ATRX;BAZ1B;BCOR;BRAF;CASK;CEP250;CLIP2;DCHS1;DIAPH1;DNMT1;EFNB1;ELN;FASTKD2;FGFR1;FLNA;GTF2I;HSD17B4;IARS2;IFT140;IFT172;IMMT;KMT2D;LONP1;LRP2;LRP4;LRP5;MED12;MTR;MYH9;MYO6;NDUFA1;NDUFB3;NDUFB9;NDUFS1;NDUFS4;NF2;NIPBL;OGDH;OPA1;PCNT;PEX1;PEX5;PIK3R1;PNPLA6;POLD1;POLG;PROM1;PRPF31;PRPF4;PRPF6;PRPF8;PTPN11;RAD21;RFC2;SMC1A;SMC3;SMCHD1;SNRNP200;VHL;VPS13B
					Cerebellar Dysmetria	0.0105291	16	BAZ1B;CAV1;CLIP2;ELN;FMR1;GTF2I;KIF1A;KIF1C;POLR3A;POLR3B;RARS;RFC2;SACS;SPTBN2;SYNE1;TECPR2
					Hepatitis A	0.0106758	35	APC;BRCA1;CDKN1A;CRNKL1;ESR1;F8;GSTP1;HLA-A;HLA-C;HNRNPA1;HNRNPA2B1;HSPG2;IGF2R;IRS1;JUN;KIF1B;LEF1;MDM2;MLH1;MYC;NCAM1;NOS2;PARP1;PCNA;PROM1;ROBO1;SIRT1;SMARCAL1;SON;STAT3;TBCA;TIMELESS;TP53;TXN;VCAN
					Abnormality of pelvic girdle bone morphology	0.0107171	12	BAZ1B;CLIP2;ELN;FLNB;GTF2I;HSPG2;IFT140;IFT172;LRP5;ORC1;RFC2;VCP
					Generalized hypotonia	0.0107171	12	BUB1B;CASK;CTBP1;HERC2;MED12;MYO5A;NSD2;POGZ;PPP2R5D;RAI1;SERPINH1;SLC12A6
					Giant Cell Tumors	0.0107171	12	AR;BRAF;CCND1;EWSR1;GJA1;MDM2;MIB1;MKI67;SRC;TP53;VIM;ZNF687
					Hoarseness	0.0107171	12	BAZ1B;CLIP2;ELN;FBN1;FLII;FLNA;FLNC;GTF2I;HRAS;LEMD3;RAI1;RFC2
					Malformed pinnae	0.0107171	12	BCOR;CHD7;FGD1;GJA1;GRIP1;KIF1A;PEX1;PEX5;POGZ;RAI1;SALL1;SIN3A
					West Syndrome	0.0111001	17	ARFGEF2;BRWD3;FLNA;HLA-A;HLA-C;HSD17B4;MTOR;NF1;NR3C1;PAFAH1B1;PLCB1;PTCH1;SOS1;SPTAN1;SPTBN2;TSC2;WDTC1
					Dysgraphia	0.0112119	7	BAZ1B;CLIP2;ELN;GTF2I;RFC2;VCP;VPS13A
					Horseshoe Kidney	0.0112119	7	CHD7;DKC1;FANCA;FANCC;FANCD2;HRAS;RBM10
					Human T-cell lymphotrophic virus, type I [HTLV-I]	0.0112119	7	ATF7IP;RELA;ST8SIA4;THBS1;TP53;TXN;WNK1
					Intestinal Polyposis	0.0112119	7	APC;CTNNB1;GNAS;HMGA1;PARP1;PTEN;SMAD4
					Mental handicap	0.0112119	7	FMR1;GBA2;HRAS;KIAA1109;SMS;SPG11;ZFYVE26
					Thymoma, type C	0.0112119	7	CDK2;EGFR;ERBB2;HRAS;HSP90AA1;IGF1R;TP53
					Verrucous carcinoma	0.0112119	7	CCND1;CDH1;EGFR;HSPA4;MAPK1;MDM2;TP53
					Vulval intraepithelial neoplasia	0.0112119	7	AKT1;CCNB1;CCND1;MIB1;MKI67;PIK3CA;TP53
					Adrenal Cortical Adenoma	0.0114708	18	ACACA;ATM;BMS1;CCNB1;CDKN1A;CTNNB1;EGFR;ENC1;ESR1;GAS5;HRAS;MALAT1;MTOR;NCAM1;NR3C1;PRKACB;RPS6KB1;TP53
					Enterovirus Infections	0.0114708	18	CALM1;CALM2;CALM3;CAV1;CSTF2;DDX46;DHX16;GBF1;HLA-A;HLA-C;HNRNPC;HNRNPD;NBR1;NUP214;PI4KB;SOD1;VIM;WDTC1
					Cerebellar Ataxia	0.0114995	78	AARS;AKT1;ATM;CALM1;CALM2;CALM3;CAPN1;CCND1;CHD2;CHEK1;CPS1;DMXL2;DNMT1;DPM1;EIF2S2;FASTKD2;FMR1;FN1;FTL;FYN;GBA2;GJA1;HSPA4;IFT140;KIAA0556;KIF1C;KMT2D;LIG3;LRPPRC;MPDU1;MYO5A;NDUFA1;NDUFB3;NDUFB9;NDUFS1;NDUFS4;NF2;NME1;NPC2;NSD2;OGDH;OPA1;PCNA;PEX1;PEX5;PIK3CA;PNP;PNPLA6;POLD1;POLG;POLR3A;POLR3B;PRKDC;PTEN;RAD17;RAD51;RNF216;RPL27A;SACS;SEC23B;SETX;SMAD2;SNX14;SPAST;SPTBN1;SPTBN2;SYNE1;TERF2;TO…
					Hyperparathyroidism	0.0115525	11	AP2S1;APC;CCND1;CDKN1A;CTNNB1;EGFR;GNAS;HRAS;OCRL;PLCB3;VDR
					Weakness of lower limb	0.0115525	11	CAV1;DCTN1;DYNC1H1;HSPD1;IMMT;KIF1A;KIF5A;NF1;SPAST;WASHC5;ZFYVE26
					Alcoholic Intoxication, Chronic	0.0118621	101	ABL1;ACTN4;ADCY3;AGO2;ANAPC1;ANK2;AP2B1;AR;ARFGEF2;BRAF;BUB1;CACNA1H;CDK5RAP2;CENPE;CFTR;CNR1;COL4A2;CREB1;CRK;CSRNP3;CTNNA2;DICER1;DST;EGF;EGFR;EHBP1;EP300;ERC1;FBN2;FLNA;FN1;FYN;GEMIN4;GLI2;GNAS;GSTP1;HDAC2;HLA-A;HLA-C;HMGA1;HNRNPA2B1;HTR2C;HTT;IGF1R;IPO11;KANK1;LEF1;LRP2;LRPPRC;MAPK1;MAPK14;MCM5;MPDZ;MSH2;MYO6;NCAM1;NEFM;NF1;NGF;NRDC;OSTC;PAPSS1;PCLO;PER1;PHF3;PIK3CA;PIK3CB;PIK3R1;PKD1;PPARG;P…
					Degenerative polyarthritis	0.0118621	124	ABCA1;ACO1;ACTN1;ADAMTS9;ANXA2;AR;ARHGAP32;ASPM;AURKA;BAG6;CALM1;CALR;CAV1;CCNB1;CD44;CDH2;CDKN1A;CNR1;CRK;CTNNB1;DDR1;DNMT1;EEF2;EFNB2;EGF;EPHB2;ERBB2;ESR1;ETFA;EZR;F8;FGFR1;FN1;FTL;GAS5;GJA1;GNL3;GPX1;GSTP1;HADHA;HDAC1;HDAC4;HIF1A;HLA-A;HMGB2;HNRNPD;HNRNPK;HSP90AA1;HSPA4;IMMT;IPO8;JAG1;JUN;LRP1;LRP5;LRP6;LRPPRC;MAP3K4;MAPK1;MAPK14;MAPK8;MDM2;MSH2;MSH3;MSH6;MYC;NCOA3;NCOR2;NGF;NOS2;NOTCH1;NOTCH3…
					helicobacter pylori infection	0.0118621	43	AKT1;AMPH;APC;APEX1;CALR;CAV1;CD44;CDC42;CDH1;CTCF;DNMT1;EGF;EGFR;ERBB2;GJA1;GSTP1;HLA-A;HLA-C;HSPA4;HSPD1;JAG1;JAK2;JUN;LONP1;MDM2;NOS2;ODC1;PARP1;PHGDH;PIK3CA;PIK3CB;PPARG;PTPN11;RAC1;RAD51;RELA;SHH;SMAD4;STAT3;TBC1D9;THBS1;TP53;WNK1
					Congenital pectus carinatum	0.0118621	15	ATP7A;BRAF;FBN1;FBN2;FLNB;HRAS;HSPG2;KAT6B;MEGF8;ORC1;PTPN11;RAB3GAP2;SMS;SOS1;SOS2
					MYOTONIC DYSTROPHY 1	0.0118621	15	BRCA1;BUB1;CTCF;ERBB2;ESR1;FEN1;GSK3B;HNRNPC;HSPD1;INSR;MORF4L1;MSH3;PTBP1;SPEN;SRRM2
					Narrow thorax	0.0118621	15	ATP7A;BCOR;DCHS1;FLNA;FLNB;HSPG2;IFT140;IFT172;INPPL1;RPS19;RUNX2;SEC23A;SERPINH1;UBA1;ZBTB20
					Pharyngeal Neoplasms	0.0118621	15	APEX1;CDH1;CDH2;CDKN1A;CTNNB1;ERBB2;FANCG;GSTP1;LIG3;LZTS1;MDM2;PCNA;PIK3CA;POLB;TP53
					Philadelphia chromosome-positive acute lymphoblastic leukemia	0.0118621	15	ABL1;AKT1;BCR;CDK2;CDK4;HSP90AA1;JAK2;MTOR;PIK3CA;PIK3CB;PTEN;RASA1;SRC;STAT5B;TP53
					Chondrosarcoma	0.0119495	41	AKT1;BIRC5;CCND1;CD44;CDK2;CDK4;CDKN1A;CRK;EGFR;EPHB2;ERBB2;EWSR1;FGFR1;GLI2;GPC3;HIF1A;HSP90AA1;HSPG2;KDM1A;MAP2;MAPK1;MAPK14;MAPK8;MIB1;MKI67;MTOR;MYC;NBR1;NCOA2;PIK3CA;PIK3CB;PPARG;PPFIBP1;PTCH1;RB1;RUNX2;TAF15;TP53;TP53BP1;VCAN;WDTC1
[truncated: 580 more rows]

## Sheet: S6D. All enrichments (dneuron)
Supplmental Table S6D. Full list of enriched diseases or symptoms from DisGeNet in dNeuron-specific CLIP targets and gene set obtained from network-based diffusion.
[truncated: 2,044 more rows]

[truncated: 2 more sheets: S6E. All enrichments (vNPC), S6F. All enrichments (vneuron)]
