# Supplementary material for: Identification of FMR1-regulated molecular networks in human neurodevelopment
Source: HighWire-hosted journal article supplement (doi:10.1101/gr.251405.119), 2020-03-01
Supplement: Supplemental_Table_S7.xlsx [file Supplemental_Table_S7.xlsx]

## Sheet: S7
Supplemental Table S7. Primers and oligos
all the primers and oligos were from IDT DNA
primer	Sequence (5’-3’)	Note
sgE3B-F	CACCGTATTATAACCTACAGGAGGT	pFMR1-sgE3B
sgE3B-R	AAACACCTCCTGTAGGTTATAATAC
ssODN-FMRP KO	GACTTTATGGCAGGGAAAACTCACCTCAACTTCATCACTTTCATTTATATCTTTATTATAACCTACAGGAATCTGACATCATGAAATGGAATCTGCCTATCAGGCTGCCAGCTGTAAATAAGCAAACATACAATTATTTA	ssODN donor for FMRP-KO
HA-L-F	GCTTGGTACCGAGCTCGGATCCACATGCACATACCCACTACTT	Construction of FLAG donor plasmid
HA-L-R	GTCATCCTTGTAATCGATGTCATGATCTTTATAGTCACCGTCATGGTCTTTGTAATCGGGTACTCCATTCACGAGTGGTTGCTGACCAT
HA-R-F	ACATCGATTACAAGGATGACGATGACAAGTAAACTGCATAATTCTGAAGTTATATTTCCTATACCAT
HA-R-R	TAGATGCATGCTCGAGCGGCCAGGCATATCCTACTAACTTTCGACC
Red-F	TGGATGCAGTGAGATGACCAG	Genotyping and sequencing FLAG cells
Red-R	TCTGCCCTGAAGTGCTAAGT
Green-F	CCGATTACAAAGACCATGACGG
Green-R	GCAGAACTTCAGTTTTTACGGCT
FMRP KO-F	AGAGGGGTCAGCCTTAACCA	PCR and sequencing KO cells
FMRP KO-R	TGGCTATTTGAGCAGTACTCAGAG
3’-adapter	AGATCGGAAGAGCACACGTCTGAAAAAAAAAA/iAzideN/AAAAAAAAAAAA/3Bio/	CLIP; underlined are barcodes
ireCLIP-RT	/5phos/GNNNNNNNNNNAGATCGGAAGAGCGTCGTGTAG/iSp18/GGATCC/iSp18/TTCAGACGTGTGCTCTTC
Elute-R	TTCAGACGTGTGCTCTTCCGATCT
PCR1-F	CTACACGACGCTCTTCCG
PCR1-R	ACGTGTGCTCTTCCGATCT
seqF	AATGATACGGCGACCACCGAGATCTACACACACTCTTTCCCTACACGACGCTCTTCCGATCT
seqR-AR002	CAAGCAGAAGACGGCATACGAGATACATCGGTGACTGGAGTTCAGACGTGTGCTCTTCCGATCT
seqR-AR004	CAAGCAGAAGACGGCATACGAGATTGGTCAGTGACTGGAGTTCAGACGTGTGCTCTTCCGATCT
seqR-AR005	CAAGCAGAAGACGGCATACGAGATCACTGTGTGACTGGAGTTCAGACGTGTGCTCTTCCGATCT
seqR-AR006	CAAGCAGAAGACGGCATACGAGATATTGGCGTGACTGGAGTTCAGACGTGTGCTCTTCCGATCT
seqR-AR007	CAAGCAGAAGACGGCATACGAGATGATCTGGTGACTGGAGTTCAGACGTGTGCTCTTCCGATCT
seqR-AR012	CAAGCAGAAGACGGCATACGAGATTACAAGGTGACTGGAGTTCAGACGTGTGCTCTTCCGATCT
seqR-AR013	CAAGCAGAAGACGGCATACGAGATTTGACTGTGACTGGAGTTCAGACGTGTGCTCTTCCGATCT
seqR-AR014	CAAGCAGAAGACGGCATACGAGATGGAACTGTGACTGGAGTTCAGACGTGTGCTCTTCCGATCT
seqR-AR015	CAAGCAGAAGACGGCATACGAGATTGACATGTGACTGGAGTTCAGACGTGTGCTCTTCCGATCT
seqR-AR016	CAAGCAGAAGACGGCATACGAGATGGACGGGTGACTGGAGTTCAGACGTGTGCTCTTCCGATCT
seqR-AR018	CAAGCAGAAGACGGCATACGAGATGCGGACGTGACTGGAGTTCAGACGTGTGCTCTTCCGATCT
seqR-AR019	CAAGCAGAAGACGGCATACGAGATTTTCACGTGACTGGAGTTCAGACGTGTGCTCTTCCGATCT
sgE17A off 1F	TGGGCATTTGGGTTAGCGT	assaying off targets in FMRP-FLAG cells (Fig. S1E)
sgE17A off 1R	GGAAGGGGAAGGATTCGACG
sgE17A off 2F	TCTATCCTTTCCCACTCAGTCCA
sgE17A off 2R	GTTGCTTTGAGTGACACTGCT
sgE17A off 3F	CACGCTCCCCTAGTGAATGG
sgE17A off 3R	ATGTGTTGAAGCTGTAAAAATGA
sgE17A off 4F	TCTTCTCTCTCCCTCGCTCC
sgE17A off 4R	GTTTACAGCCTGGGGTCCTC
sgE17A off 5F	ACTCACTATACTGTACTGTTTTGAA
sgE17A off 5R	GCCCTCCTATGTGCTCGTTT
sgE3B off 1F	CAATTGCCCATACTGGTGCT	assaying off targets in FMRP-KO cells (Fig. S5C)
sgE3B off 1R	TATGGGGATGGGATGTGGGT
sgE3B off 2F	TTATCCATCAGTGGGCACTCTC
sgE3B off 2R	TGGTTTACAGATCGGTTGGCT
sgE3B off 3F	TGGGATCACCACAGAGCTAGT
sgE3B off 3R	TTCATCACTGTACCCCGTGC
sgE3B off 4F	CTCAACAGGGCTGAGGACAG
sgE3B off 4R	AGCAGCCCAGTCAAGAACTC
sgE3B off 5F	TGATGGGCAGAAAGCCAACT
sgE3B off 5R	CACACTGGCTAGAAGGAGCA
GAPDH-qF	CAAATTCCATGGCACCGTCA
GAPDH-qR	TTGGAGGGATCTCGCTCCTGG
PPIA-qF1	GTTCTTCGACATTGCCGTCG
PPIA-qR1	GAAGTCACCACCCTGACACA
NUP188-qF1	GCACAGCACAGACACCTAGT
NUP188-qR1	TCAGGCAGGAAGTTGTAGCG
NUP205-qF1	GTGTCCCACAGAGCCTCTTC
NUP205-qR1	ACAAGACAACCTGGCGTTGA
STON2-qF1	GGCTGACTCAACTGACAATTCCT
STON2-qR1	CCATTCATGGCTGGACTGCT
ZNF423-qF1	AGGAAGGCATCAACCACGAG
ZNF423-qR1	GCCTGGACGAAGACTGTGAA
NFX1-qF1	ATGCTGGCAAGCCAGTTTTG
NFX1-qR1	CTCATGGACTCTAGCGCAGG
CTNNB1-qF1	GCTGGGACCTTGCATAACCT
CTNNB1-qR1	TCCACTGGTGAACCAAGCAT
PRKDC-qF1	GCGGCTTACCTGAGTGATCC
PRKDC-qR1	TCAGTACGATTAGCGCCCTT
EIF4G1-qF1	CTGTGCAAAAGCATGGGTCC
EIF4G1-qR1	TCCACCTTCTGTTCAGCGAC
CREBBP-qF1	CGTGTCACAGGGACAGGTG
CREBBP-qR1	GTGACTGTGTCACTGGAGGG
AP2A1-qF1	AACAACGGGGTCCTGTTCGAG
AP2A1-qR1	ATAGAAGAGATACATGCGGCCCAG
PIK3CA-qF1	CTTGTTCCAATCCCAGGTGGA
PIK3CA-qR1	TTAGCACCCTTTCGGCCTTT
UPF1-qF1	AGACTGACTCTGACATGCGG
UPF1-qR1	CAGGGACCTTGATGACGTGG
BACH2-qF1	TCACAAGGTTGCCCCACAAA
BACH2-qR1	TGCCGTTCACACCATGTAAT
PLEKHA8-qF1	ACTATCTGAGCGGTTGGCAG
PLEKHA8-qR1	CCTTTGCAACCTTTCCAGGC
SEC24C-qF1	CCGGACAAGCACTGGTATCC
SEC24C-qR1	ATTGAGCCGATCGTCATGCT
SMC4-qF1	TCGAAGTAGGGGGAAAGTCCT
SMC4-qR1	GGCTCCTAAGTCCCCCAATC
CLSPN-qF1	TGAACGAGAGCAGTGGCTTC
CLSPN-qR1	TAGGGCGACTGGCATTCTTC
LATS2-qF1	GCAGGATGCGACCAGGAGAT
LATS2-qR1	TTCCTGGGGAGGTCTGCTTA
POGK-qF1	AAGGGAAAGGGAAAGCAAATGG
POGK-qR1	CAGCGCATCCACACTTTCAG
PTPRM-qF1	GTTGTGCACTGCTTGAACGG
PTPRM-qR1	CCTCAGTGTCTTCACAGCGT
PIK3CB-qF	CCCTGACTTCTCCCCTTGTTT
PIK3CB-qR	CTCCCATATGCATGGCTCCTT
TTC3P1-qF	AAAAACGTGCGTGTGCTCAA
TTC3P1-qR	CCAGAAGGTGCAGGCTACTC
GTPBP1-qF	CATCACCAAGCTCCTCCAGAC
GTPBP1-qR	CCCCTCGTCTCGTTTCGTCA
SPATA13-qF1	GCTTCGTCAGATTGCGAGTG
SPATA13-qR1	TTCTCACAGTGTCTGTGGCG
GALNT1-qF1	AACATGACAGGAGAACAGTGGT
GALNT1-qR1	AGCTTCCAGTTGAACCCACC
AEBP1-qF1	ATTACTTTGGGCCTCCTCCG
AEBP1-qR1	CCTCCTTTTTGGGTTTCTTCAGC
KIF3B-qF1	TAACCAGACTGGAGAACCAGC
KIF3B-qR1	TATCGGGCCTCTGGACGAAT
CTNNA1-qF1	GCAGCCAAAAGACAACAGGAAT
CTNNA1-qR1	GGCCTTATAGGCTGCGACAT
DGKK-qF1	GCCATCATCTGTGAAGTGTGC
DGKK-qR1	ACCCATTGATGGGGCATGTT
ATP10D-qF1	GTGGTCCGACACCCTCTTTC
ATP10D-qR1	AGACTTGCTCCATCTGGGGA
ARHGAP39-qF1	GCTTCCTGCAGGTCTTCGT
ARHGAP39-qR1	CATCTCCTTGCGGGTGTTCT
SMG8-qF1	TCCTCTCAAGGTAGAGGGCT
SMG8-qR1	CTGGCTGAACCTGAGGCATT
AXL-qF1	CAAGAGCGATGTGTGGTCCT
AXL-qR1	TTTCCCTGGCGCAGATAGTC
ABCC1	AGAGCCCAAAGTGGAATCCG
ABCC1	TCTCTGGGTTTGAAGTCGGC
FLNB-qF1	CGAGCTGACGACACGGATTC
FLNB-qR1	GCTCCACCAAGCCTGTCTTATT
SMS-qF	CCCTTCATACTTGGAATTGTGGG
SMS-qR	CAGGAAGGCTATTTGCAGCAC
CHD7-qF2	TGATGAGTCTTTTTGGCGAGG
CHD7-qR2	CTGGATTTTCCGGGTAACCAC
DNM2-qF	TGCCAACAGTGACCTCTTCC
DNM2-qR	GTCTTCTGCTGGGCACTCC
EIF2AK1-qF	GTGATAGCCATGACTCCCCG
EIF2AK1-qR	TGAAGCAACGCAAAGATGCC
SDK1-qF	TGTTGCTCTCGGGTTTTCGAT
SDK1-qR	CGCTCCGTACAGATCAAGGT
RPS3-qF	TGTTGCTCAGACAGGGTGTG
RPS3-qR	TTCCACAATGCTCACGTGGT
RPL27-qF	CACCTAATGCCCACAAGGTACT
RPL27-qR	AAACTTGACCTTGGCCTCCC
RPL27A-qF	AGAGCTTCTGCCCAACTGTC
RPL27A-qR	TTTGTAGTAGCCCGATCGCA
RPS24-qF	GATCGCCATCATGAACGACAC
RPS24-qR	TCTGTCTTAGGCACTGTCGC
RPL26-qF	TGAAGTTCAGGTTGTACGTGGA
RPL26-qR	CATTAGCCTTTTCCCGCTGC
RPS18-qF	ATACAGCCAGGTCCTAGCCA
RPS18-qR	AAGTGACGCAGCCCTCTATG
RPL21-qF	AAAAGGAATGCCCCACAAGT
RPL21-qR	TCTTGCCCTTAACTTGTTTGTTTAC
RPL39-qF	GTGTGTTCTTGACTCCGCTG
RPL39-qR	TCCTTTTGGAGTTGTACCTGAT
RPS17-qF	AAGCGAATTCAGAGAGGCCC
RPS17-qR	AGGCTGAGACCTCAGGAACA
RPS21-qF	GCCTCGAAATGCAGAACGAC
RPS21-qR	TGTGACCTTGTCAACCTCGG
RPS27A-qF	CCAAGATCCAGGATAAGGAAGGAAT
RPS27A-qR	GCACCACCACGAAGTCTCAA
COX7C-qF	GTGCCGCCATTTCATCTGTC
COX7C-qR	TGGCAAATTCTTCCCAGGGC
TOMM7-qF	GCTGGGGCTTTATCCCTCTT
TOMM7-qR	CCCCAAAGTAGGCTCAAAACAG
UQCRB-qF	CCGTTTCAGCATCAGGCAAG
UQCRB-qR	TCATCTCGCATTAACCCCAGT
NCOA2-qF	GGTGGCTCCTAGTGGTATGC
NCOA2-qR	TGCTGACTTATTCCGTAGTTTGGA
RPL12-qF	GCACCGATCCTTAGCCAGAG
RPL12-qR	GCTTAACTGGCTGGGCATTC
